# Supplementary material
Source: Research Square preprint supplement (doi:10.21203/rs.3.rs-8902045/v1)
Supplement: Supplementary file 1 [file 07c3168939e6a81d2a0463bf.xlsx]

## Sheet: Legend
Sheet	Legend
hPANCAN-ABE	human PanCancer base editing library sgRNAs for ABE
hPANCAN-CBE	human PanCancer base editing library sgRNAs for CBE
Group	Group detail in hPANCAN-BE screens
sgRNA_count_ABE	Count for each sgRNA in hPANCAN-ABE screen
Rank_ABE	Rank for 128 functional metastasis SNVs in hPANCAN-ABE screens
Score_ABE	β Score for each SNV in hPANCAN-ABE screens
sgRNA_count_CBE	Count for each sgRNA in hPANCAN-CBE screen
Rank_CBE	Rank for 141 functional metastasis SNVs in hPANCAN-CBE screens
Score_CBE	β Score for each SNV in hPANCAN-CBE screens

## Sheet: hPANCAN-ABE
ID	Sequence	SNV
ZSCAN31_6:28329674_A>G_6	GCTTCAACAGAGGAACAGT	ZSCAN31_c.10A>G_p.T4A
ZSCAN31_6:28329674_A>G_5	CTTCAACAGAGGAACAGTA	ZSCAN31_c.10A>G_p.T4A
ZSCAN31_6:28329674_A>G_4	TTCAACAGAGGAACAGTAC	ZSCAN31_c.10A>G_p.T4A
ZSCAN31_6:28329674_A>G_3	TCAACAGAGGAACAGTACG	ZSCAN31_c.10A>G_p.T4A
ZSCAN31_6:28329674_A>G_2	CAACAGAGGAACAGTACGA	ZSCAN31_c.10A>G_p.T4A
ZRANB1_10:124972080_A>G_6	CTTGCTATTTTCTGACTGA	ZRANB1_c.1118A>G_p.Y373C
ZRANB1_10:124972080_A>G_5	TTGCTATTTTCTGACTGAC	ZRANB1_c.1118A>G_p.Y373C
ZRANB1_10:124972080_A>G_4	TGCTATTTTCTGACTGACC	ZRANB1_c.1118A>G_p.Y373C
ZRANB1_10:124972080_A>G_3	GCTATTTTCTGACTGACCT	ZRANB1_c.1118A>G_p.Y373C
ZRANB1_10:124972080_A>G_2	CTATTTTCTGACTGACCTT	ZRANB1_c.1118A>G_p.Y373C
ZNF850_19:36748689_T>C_6	TCATAGAGCTTCTCACCAG	ZNF850_c.2351T>C_p.L784P
ZNF850_19:36748689_T>C_5	CATAGAGCTTCTCACCAGT	ZNF850_c.2351T>C_p.L784P
ZNF850_19:36748689_T>C_4	ATAGAGCTTCTCACCAGTG	ZNF850_c.2351T>C_p.L784P
ZNF850_19:36748689_T>C_3	TAGAGCTTCTCACCAGTGT	ZNF850_c.2351T>C_p.L784P
ZNF850_19:36748689_T>C_2	AGAGCTTCTCACCAGTGTG	ZNF850_c.2351T>C_p.L784P
ZNF8_19:58294962_T>C_6	TGCAGGAAAAGGCAAGTGG	ZNF8_c.1154T>C_p.F385S
ZNF8_19:58294962_T>C_5	GCAGGAAAAGGCAAGTGGT	ZNF8_c.1154T>C_p.F385S
ZNF8_19:58294962_T>C_4	CAGGAAAAGGCAAGTGGTC	ZNF8_c.1154T>C_p.F385S
ZNF8_19:58294962_T>C_3	AGGAAAAGGCAAGTGGTCC	ZNF8_c.1154T>C_p.F385S
ZNF8_19:58294962_T>C_2	GGAAAAGGCAAGTGGTCCG	ZNF8_c.1154T>C_p.F385S
ZNF775_7:150397239_T>C_6	AGCCCCAGCCAGGCCCACT	ZNF775_c.758T>C_p.L253P
ZNF775_7:150397239_T>C_5	GCCCCAGCCAGGCCCACTC	ZNF775_c.758T>C_p.L253P
ZNF775_7:150397239_T>C_4	CCCCAGCCAGGCCCACTCG	ZNF775_c.758T>C_p.L253P
ZNF775_7:150397239_T>C_3	CCCAGCCAGGCCCACTCGG	ZNF775_c.758T>C_p.L253P
ZNF775_7:150397239_T>C_2	CCAGCCAGGCCCACTCGGG	ZNF775_c.758T>C_p.L253P
ZNF714_19:21117935_T>C_6	TTGTAGAGTTTCTCTCCAG	ZNF714_c.1271T>C_p.L424P
ZNF714_19:21117935_T>C_5	TGTAGAGTTTCTCTCCAGT	ZNF714_c.1271T>C_p.L424P
ZNF714_19:21117935_T>C_4	GTAGAGTTTCTCTCCAGTA	ZNF714_c.1271T>C_p.L424P
ZNF714_19:21117935_T>C_3	TAGAGTTTCTCTCCAGTAT	ZNF714_c.1271T>C_p.L424P
ZNF714_19:21117935_T>C_2	AGAGTTTCTCTCCAGTATG	ZNF714_c.1271T>C_p.L424P
ZNF708_19:21293717_A>G_6	ACTGGAAAGAAACCCTACA	ZNF708_c.1249A>G_p.K417E
ZNF708_19:21293717_A>G_5	CTGGAAAGAAACCCTACAA	ZNF708_c.1249A>G_p.K417E
ZNF708_19:21293717_A>G_4	TGGAAAGAAACCCTACAAA	ZNF708_c.1249A>G_p.K417E
ZNF708_19:21293717_A>G_3	GGAAAGAAACCCTACAAAT	ZNF708_c.1249A>G_p.K417E
ZNF708_19:21293717_A>G_2	GAAAGAAACCCTACAAATG	ZNF708_c.1249A>G_p.K417E
ZNF708_19:21293447_A>G_6	AAATGTAAAGAATGTGGCA	ZNF708_c.1519A>G_p.K507E
ZNF708_19:21293447_A>G_5	AATGTAAAGAATGTGGCAA	ZNF708_c.1519A>G_p.K507E
ZNF708_19:21293447_A>G_4	ATGTAAAGAATGTGGCAAA	ZNF708_c.1519A>G_p.K507E
ZNF708_19:21293447_A>G_3	TGTAAAGAATGTGGCAAAG	ZNF708_c.1519A>G_p.K507E
ZNF708_19:21293447_A>G_2	GTAAAGAATGTGGCAAAGC	ZNF708_c.1519A>G_p.K507E
ZNF681_19:23744037_T>C_6	TGTAGGATTTCTCTCCAGT	ZNF681_c.1513T>C_p.S505P
ZNF681_19:23744037_T>C_5	GTAGGATTTCTCTCCAGTA	ZNF681_c.1513T>C_p.S505P
ZNF681_19:23744037_T>C_4	TAGGATTTCTCTCCAGTAT	ZNF681_c.1513T>C_p.S505P
ZNF681_19:23744037_T>C_3	AGGATTTCTCTCCAGTATG	ZNF681_c.1513T>C_p.S505P
ZNF681_19:23744037_T>C_2	GGATTTCTCTCCAGTATGA	ZNF681_c.1513T>C_p.S505P
ZNF571_19:37565967_T>C_6	TGAATAAGGCATGACAGGT	ZNF571_c.461T>C_p.L154P
ZNF571_19:37565967_T>C_5	GAATAAGGCATGACAGGTA	ZNF571_c.461T>C_p.L154P
ZNF571_19:37565967_T>C_4	AATAAGGCATGACAGGTAG	ZNF571_c.461T>C_p.L154P
ZNF571_19:37565967_T>C_3	ATAAGGCATGACAGGTAGC	ZNF571_c.461T>C_p.L154P
ZNF571_19:37565967_T>C_2	TAAGGCATGACAGGTAGCT	ZNF571_c.461T>C_p.L154P
ZNF516_18:76442816_A>G_6	AGATTCACATCCGGAGCCA	ZNF516_c.239A>G_p.H80R
ZNF516_18:76442816_A>G_5	GATTCACATCCGGAGCCAC	ZNF516_c.239A>G_p.H80R
ZNF516_18:76442816_A>G_4	ATTCACATCCGGAGCCACC	ZNF516_c.239A>G_p.H80R
ZNF516_18:76442816_A>G_3	TTCACATCCGGAGCCACCG	ZNF516_c.239A>G_p.H80R
ZNF516_18:76442816_A>G_2	TCACATCCGGAGCCACCGC	ZNF516_c.239A>G_p.H80R
ZNF492_19:22663895_T>C_6	TTTCACATCCACATTTTTT	ZNF492_c.226T>C_p.C76R
ZNF492_19:22663895_T>C_5	TTCACATCCACATTTTTTA	ZNF492_c.226T>C_p.C76R
ZNF492_19:22663895_T>C_4	TCACATCCACATTTTTTAT	ZNF492_c.226T>C_p.C76R
ZNF492_19:22663895_T>C_3	CACATCCACATTTTTTATA	ZNF492_c.226T>C_p.C76R
ZNF492_19:22663895_T>C_2	ACATCCACATTTTTTATAT	ZNF492_c.226T>C_p.C76R
ZNF462_9:106928234_A>G_6	AGCAGGAAGCTGAATGTCC	ZNF462_c.4322A>G_p.E1441G
ZNF462_9:106928234_A>G_5	GCAGGAAGCTGAATGTCCA	ZNF462_c.4322A>G_p.E1441G
ZNF462_9:106928234_A>G_4	CAGGAAGCTGAATGTCCAG	ZNF462_c.4322A>G_p.E1441G
ZNF462_9:106928234_A>G_3	AGGAAGCTGAATGTCCAGA	ZNF462_c.4322A>G_p.E1441G
ZNF462_9:106928234_A>G_2	GGAAGCTGAATGTCCAGAG	ZNF462_c.4322A>G_p.E1441G
ZNF430_19:21057507_T>C_6	TTGTAGAATTTCTCTCCAG	ZNF430_c.1199T>C_p.F400S
ZNF430_19:21057507_T>C_5	TGTAGAATTTCTCTCCAGT	ZNF430_c.1199T>C_p.F400S
ZNF430_19:21057507_T>C_4	GTAGAATTTCTCTCCAGTA	ZNF430_c.1199T>C_p.F400S
ZNF430_19:21057507_T>C_3	TAGAATTTCTCTCCAGTAT	ZNF430_c.1199T>C_p.F400S
ZNF430_19:21057507_T>C_2	AGAATTTCTCTCCAGTATG	ZNF430_c.1199T>C_p.F400S
ZNF430_19:21057506_T>C_6	TGTAGAATTTCTCTCCAGT	ZNF430_c.1198T>C_p.F400L
ZNF430_19:21057506_T>C_5	GTAGAATTTCTCTCCAGTA	ZNF430_c.1198T>C_p.F400L
ZNF430_19:21057506_T>C_4	TAGAATTTCTCTCCAGTAT	ZNF430_c.1198T>C_p.F400L
ZNF430_19:21057506_T>C_3	AGAATTTCTCTCCAGTATG	ZNF430_c.1198T>C_p.F400L
ZNF430_19:21057506_T>C_2	GAATTTCTCTCCAGTATGA	ZNF430_c.1198T>C_p.F400L
ZNF429_19:21536979_A>G_6	ATACTGAAGAGAAACCCTA	ZNF429_c.926A>G_p.E309G
ZNF429_19:21536979_A>G_5	TACTGAAGAGAAACCCTAC	ZNF429_c.926A>G_p.E309G
ZNF429_19:21536979_A>G_4	ACTGAAGAGAAACCCTACA	ZNF429_c.926A>G_p.E309G
ZNF429_19:21536979_A>G_3	CTGAAGAGAAACCCTACAA	ZNF429_c.926A>G_p.E309G
ZNF429_19:21536979_A>G_2	TGAAGAGAAACCCTACAAA	ZNF429_c.926A>G_p.E309G
ZNF182_X:47977708_A>G_6	GACAAGAAAACAATTATCA	ZNF182_c.379A>G_p.K127E
ZNF182_X:47977708_A>G_5	ACAAGAAAACAATTATCAC	ZNF182_c.379A>G_p.K127E
ZNF182_X:47977708_A>G_4	CAAGAAAACAATTATCACC	ZNF182_c.379A>G_p.K127E
ZNF182_X:47977708_A>G_3	AAGAAAACAATTATCACCA	ZNF182_c.379A>G_p.K127E
ZNF182_X:47977708_A>G_2	AGAAAACAATTATCACCAA	ZNF182_c.379A>G_p.K127E
ZNF135_19:58068096_A>G_6	CCCCTCATTCAGCATCAGA	ZNF135_c.1684A>G_p.I562V
ZNF135_19:58068096_A>G_5	CCCTCATTCAGCATCAGAG	ZNF135_c.1684A>G_p.I562V
ZNF135_19:58068096_A>G_4	CCTCATTCAGCATCAGAGG	ZNF135_c.1684A>G_p.I562V
ZNF135_19:58068096_A>G_3	CTCATTCAGCATCAGAGGA	ZNF135_c.1684A>G_p.I562V
ZNF135_19:58068096_A>G_2	TCATTCAGCATCAGAGGAT	ZNF135_c.1684A>G_p.I562V
ZMPSTE24_1:40281519_A>G_6	AAAGCTAAAGTTAAAGTGA	ZMPSTE24_c.946A>G_p.K316E
ZMPSTE24_1:40281519_A>G_5	AAGCTAAAGTTAAAGTGAG	ZMPSTE24_c.946A>G_p.K316E
ZMPSTE24_1:40281519_A>G_4	AGCTAAAGTTAAAGTGAGT	ZMPSTE24_c.946A>G_p.K316E
ZMPSTE24_1:40281519_A>G_3	GCTAAAGTTAAAGTGAGTT	ZMPSTE24_c.946A>G_p.K316E
ZMPSTE24_1:40281519_A>G_2	CTAAAGTTAAAGTGAGTTA	ZMPSTE24_c.946A>G_p.K316E
ZIC3_X:137569951_A>G_6	TCTTCCACTCCACCCGCTA	ZIC3_c.1285A>G_p.T429A
ZIC3_X:137569951_A>G_5	CTTCCACTCCACCCGCTAT	ZIC3_c.1285A>G_p.T429A
ZIC3_X:137569951_A>G_4	TTCCACTCCACCCGCTATA	ZIC3_c.1285A>G_p.T429A
ZIC3_X:137569951_A>G_3	TCCACTCCACCCGCTATAG	ZIC3_c.1285A>G_p.T429A
ZIC3_X:137569951_A>G_2	CCACTCCACCCGCTATAGC	ZIC3_c.1285A>G_p.T429A
ZFPM2_8:105444330_T>C_6	TCTCTGACTGTGTGTCCCC	ZFPM2_c.250T>C_p.S84P
ZFPM2_8:105444330_T>C_5	CTCTGACTGTGTGTCCCCA	ZFPM2_c.250T>C_p.S84P
ZFPM2_8:105444330_T>C_4	TCTGACTGTGTGTCCCCAT	ZFPM2_c.250T>C_p.S84P
ZFPM2_8:105444330_T>C_3	CTGACTGTGTGTCCCCATC	ZFPM2_c.250T>C_p.S84P
ZFPM2_8:105444330_T>C_2	TGACTGTGTGTCCCCATCT	ZFPM2_c.250T>C_p.S84P
ZACN_17:76081755_A>G_6	CTGCTCAGTAAGCCCTGCT	ZACN_c.880A>G_p.I294V
ZACN_17:76081755_A>G_5	TGCTCAGTAAGCCCTGCTC	ZACN_c.880A>G_p.I294V
ZACN_17:76081755_A>G_4	GCTCAGTAAGCCCTGCTCC	ZACN_c.880A>G_p.I294V
ZACN_17:76081755_A>G_3	CTCAGTAAGCCCTGCTCCC	ZACN_c.880A>G_p.I294V
ZACN_17:76081755_A>G_2	TCAGTAAGCCCTGCTCCCT	ZACN_c.880A>G_p.I294V
XIRP2_2:167246620_T>C_6	AACTGAACATTTCCTCTCT	XIRP2_c.5228T>C_p.V1743A
XIRP2_2:167246620_T>C_5	ACTGAACATTTCCTCTCTC	XIRP2_c.5228T>C_p.V1743A
XIRP2_2:167246620_T>C_4	CTGAACATTTCCTCTCTCA	XIRP2_c.5228T>C_p.V1743A
XIRP2_2:167246620_T>C_3	TGAACATTTCCTCTCTCAG	XIRP2_c.5228T>C_p.V1743A
XIRP2_2:167246620_T>C_2	GAACATTTCCTCTCTCAGA	XIRP2_c.5228T>C_p.V1743A
WRN_8:31157494_A>G_6	AAGATTATTGCTGATGTTA	WRN_c.3946A>G_p.I1316V
WRN_8:31157494_A>G_5	AGATTATTGCTGATGTTAT	WRN_c.3946A>G_p.I1316V
WRN_8:31157494_A>G_4	GATTATTGCTGATGTTATC	WRN_c.3946A>G_p.I1316V
WRN_8:31157494_A>G_3	ATTATTGCTGATGTTATCC	WRN_c.3946A>G_p.I1316V
WRN_8:31157494_A>G_2	TTATTGCTGATGTTATCCG	WRN_c.3946A>G_p.I1316V
WNK2_9:93293052_A>G_6	GTGGGCATGAAGGTCCCCA	WNK2_c.5698A>G_p.M1900V
WNK2_9:93293052_A>G_5	TGGGCATGAAGGTCCCCAC	WNK2_c.5698A>G_p.M1900V
WNK2_9:93293052_A>G_4	GGGCATGAAGGTCCCCACG	WNK2_c.5698A>G_p.M1900V
WNK2_9:93293052_A>G_3	GGCATGAAGGTCCCCACGA	WNK2_c.5698A>G_p.M1900V
WNK2_9:93293052_A>G_2	GCATGAAGGTCCCCACGAT	WNK2_c.5698A>G_p.M1900V
WDR60_7:158876636_A>G_6	AGAAAGATGAAGACTCTGA	WDR60_c.518A>G_p.D173G
WDR60_7:158876636_A>G_5	GAAAGATGAAGACTCTGAA	WDR60_c.518A>G_p.D173G
WDR60_7:158876636_A>G_4	AAAGATGAAGACTCTGAAA	WDR60_c.518A>G_p.D173G
WDR60_7:158876636_A>G_3	AAGATGAAGACTCTGAAAG	WDR60_c.518A>G_p.D173G
WDR60_7:158876636_A>G_2	AGATGAAGACTCTGAAAGA	WDR60_c.518A>G_p.D173G
WDR45B_17:82616023_A>G_6	CCAGCAATTTGTGCAGACG	WDR45B_c.931A>G_p.I311V
WDR45B_17:82616023_A>G_5	CAGCAATTTGTGCAGACGG	WDR45B_c.931A>G_p.I311V
WDR45B_17:82616023_A>G_4	AGCAATTTGTGCAGACGGC	WDR45B_c.931A>G_p.I311V
WDR45B_17:82616023_A>G_3	GCAATTTGTGCAGACGGCA	WDR45B_c.931A>G_p.I311V
WDR45B_17:82616023_A>G_2	CAATTTGTGCAGACGGCAG	WDR45B_c.931A>G_p.I311V
VWDE_7:12380623_A>G_6	GCTACAAAAAACTCAGTGG	VWDE_c.652A>G_p.K218E
VWDE_7:12380623_A>G_5	CTACAAAAAACTCAGTGGG	VWDE_c.652A>G_p.K218E
VWDE_7:12380623_A>G_4	TACAAAAAACTCAGTGGGA	VWDE_c.652A>G_p.K218E
VWDE_7:12380623_A>G_3	ACAAAAAACTCAGTGGGAT	VWDE_c.652A>G_p.K218E
VWDE_7:12380623_A>G_2	CAAAAAACTCAGTGGGATT	VWDE_c.652A>G_p.K218E
VWDE_7:12370204_A>G_6	AAAAACACATAAACCTGAC	VWDE_c.2102A>G_p.H701R
VWDE_7:12370204_A>G_5	AAAACACATAAACCTGACT	VWDE_c.2102A>G_p.H701R
VWDE_7:12370204_A>G_4	AAACACATAAACCTGACTA	VWDE_c.2102A>G_p.H701R
VWDE_7:12370204_A>G_3	AACACATAAACCTGACTAA	VWDE_c.2102A>G_p.H701R
VWDE_7:12370204_A>G_2	ACACATAAACCTGACTAAA	VWDE_c.2102A>G_p.H701R
VPS33B_15:91017857_A>G_6	TCATTGAGGCAGATCTCAT	VPS33B_c.125A>G_p.E42G
VPS33B_15:91017857_A>G_5	CATTGAGGCAGATCTCATG	VPS33B_c.125A>G_p.E42G
VPS33B_15:91017857_A>G_4	ATTGAGGCAGATCTCATGA	VPS33B_c.125A>G_p.E42G
VPS33B_15:91017857_A>G_3	TTGAGGCAGATCTCATGAG	VPS33B_c.125A>G_p.E42G
VPS33B_15:91017857_A>G_2	TGAGGCAGATCTCATGAGC	VPS33B_c.125A>G_p.E42G
VPS13B_8:99720928_A>G_6	CCAGGGATGATGTTATGGA	VPS13B_c.7006A>G_p.M2336V
VPS13B_8:99720928_A>G_5	CAGGGATGATGTTATGGAG	VPS13B_c.7006A>G_p.M2336V
VPS13B_8:99720928_A>G_4	AGGGATGATGTTATGGAGA	VPS13B_c.7006A>G_p.M2336V
VPS13B_8:99720928_A>G_3	GGGATGATGTTATGGAGAT	VPS13B_c.7006A>G_p.M2336V
VPS13B_8:99720928_A>G_2	GGATGATGTTATGGAGATA	VPS13B_c.7006A>G_p.M2336V
VEZF1_17:57982768_A>G_6	CTTACCATGTGAGGTCTCA	VEZF1_c.659A>G_p.H220R
VEZF1_17:57982768_A>G_5	TTACCATGTGAGGTCTCAT	VEZF1_c.659A>G_p.H220R
VEZF1_17:57982768_A>G_4	TACCATGTGAGGTCTCATG	VEZF1_c.659A>G_p.H220R
VEZF1_17:57982768_A>G_3	ACCATGTGAGGTCTCATGA	VEZF1_c.659A>G_p.H220R
VEZF1_17:57982768_A>G_2	CCATGTGAGGTCTCATGAA	VEZF1_c.659A>G_p.H220R
USP6NL_10:11532189_A>G_6	CTGATTATCTCACAAAGGG	USP6NL_c.44A>G_p.Y15C
USP6NL_10:11532189_A>G_5	TGATTATCTCACAAAGGGT	USP6NL_c.44A>G_p.Y15C
USP6NL_10:11532189_A>G_4	GATTATCTCACAAAGGGTA	USP6NL_c.44A>G_p.Y15C
USP6NL_10:11532189_A>G_3	ATTATCTCACAAAGGGTAA	USP6NL_c.44A>G_p.Y15C
USP6NL_10:11532189_A>G_2	TTATCTCACAAAGGGTAAA	USP6NL_c.44A>G_p.Y15C
USF3_3:113661110_A>G_6	CTTGCAATCTTGTGACTCC	USF3_c.572A>G_p.N191S
USF3_3:113661110_A>G_5	TTGCAATCTTGTGACTCCT	USF3_c.572A>G_p.N191S
USF3_3:113661110_A>G_4	TGCAATCTTGTGACTCCTG	USF3_c.572A>G_p.N191S
USF3_3:113661110_A>G_3	GCAATCTTGTGACTCCTGT	USF3_c.572A>G_p.N191S
USF3_3:113661110_A>G_2	CAATCTTGTGACTCCTGTA	USF3_c.572A>G_p.N191S
UGT2B11_4:69200588_A>G_6	CAGCCCATGACCTCACCTG	UGT2B11_c.1442A>G_p.H481R
UGT2B11_4:69200588_A>G_5	AGCCCATGACCTCACCTGG	UGT2B11_c.1442A>G_p.H481R
UGT2B11_4:69200588_A>G_4	GCCCATGACCTCACCTGGT	UGT2B11_c.1442A>G_p.H481R
UGT2B11_4:69200588_A>G_3	CCCATGACCTCACCTGGTT	UGT2B11_c.1442A>G_p.H481R
UGT2B11_4:69200588_A>G_2	CCATGACCTCACCTGGTTC	UGT2B11_c.1442A>G_p.H481R
UBR1_15:42998185_A>G_6	GTTATAATATAAGACATGC	UBR1_c.3740A>G_p.N1247S
UBR1_15:42998185_A>G_5	TTATAATATAAGACATGCT	UBR1_c.3740A>G_p.N1247S
UBR1_15:42998185_A>G_4	TATAATATAAGACATGCTA	UBR1_c.3740A>G_p.N1247S
UBR1_15:42998185_A>G_3	ATAATATAAGACATGCTAA	UBR1_c.3740A>G_p.N1247S
UBR1_15:42998185_A>G_2	TAATATAAGACATGCTAAA	UBR1_c.3740A>G_p.N1247S
UBAP2_9:33923284_A>G_6	ATGACGACCTGACCCAGGG	UBAP2_c.2906A>G_p.D969G
UBAP2_9:33923284_A>G_5	TGACGACCTGACCCAGGGG	UBAP2_c.2906A>G_p.D969G
UBAP2_9:33923284_A>G_4	GACGACCTGACCCAGGGGA	UBAP2_c.2906A>G_p.D969G
UBAP2_9:33923284_A>G_3	ACGACCTGACCCAGGGGAC	UBAP2_c.2906A>G_p.D969G
UBAP2_9:33923284_A>G_2	CGACCTGACCCAGGGGACA	UBAP2_c.2906A>G_p.D969G
TUBGCP6_22:50220746_A>G_6	TCAGACATGGCTCCCACCC	TUBGCP6_c.3613A>G_p.M1205V
TUBGCP6_22:50220746_A>G_5	CAGACATGGCTCCCACCCG	TUBGCP6_c.3613A>G_p.M1205V
TUBGCP6_22:50220746_A>G_4	AGACATGGCTCCCACCCGG	TUBGCP6_c.3613A>G_p.M1205V
TUBGCP6_22:50220746_A>G_3	GACATGGCTCCCACCCGGC	TUBGCP6_c.3613A>G_p.M1205V
TUBGCP6_22:50220746_A>G_2	ACATGGCTCCCACCCGGCC	TUBGCP6_c.3613A>G_p.M1205V
TUBB8_10:48078_A>G_6	AGGGACACTACACCGAAGG	TUBB8_c.314A>G_p.H105R
TUBB8_10:48078_A>G_5	GGGACACTACACCGAAGGC	TUBB8_c.314A>G_p.H105R
TUBB8_10:48078_A>G_4	GGACACTACACCGAAGGCG	TUBB8_c.314A>G_p.H105R
TUBB8_10:48078_A>G_3	GACACTACACCGAAGGCGC	TUBB8_c.314A>G_p.H105R
TUBB8_10:48078_A>G_2	ACACTACACCGAAGGCGCG	TUBB8_c.314A>G_p.H105R
TTLL4_2:218738277_A>G_6	TCTGCCATCTCAGGGAAGA	TTLL4_c.601A>G_p.I201V
TTLL4_2:218738277_A>G_5	CTGCCATCTCAGGGAAGAT	TTLL4_c.601A>G_p.I201V
TTLL4_2:218738277_A>G_4	TGCCATCTCAGGGAAGATC	TTLL4_c.601A>G_p.I201V
TTLL4_2:218738277_A>G_3	GCCATCTCAGGGAAGATCC	TTLL4_c.601A>G_p.I201V
TTLL4_2:218738277_A>G_2	CCATCTCAGGGAAGATCCC	TTLL4_c.601A>G_p.I201V
TTC3_21:37090282_A>G_6	AAATAGAAAATGTAAGTGT	TTC3_c.476A>G_p.E159G
TTC3_21:37090282_A>G_5	AATAGAAAATGTAAGTGTT	TTC3_c.476A>G_p.E159G
TTC3_21:37090282_A>G_4	ATAGAAAATGTAAGTGTTA	TTC3_c.476A>G_p.E159G
TTC3_21:37090282_A>G_3	TAGAAAATGTAAGTGTTAA	TTC3_c.476A>G_p.E159G
TTC3_21:37090282_A>G_2	AGAAAATGTAAGTGTTAAA	TTC3_c.476A>G_p.E159G
TRIM63_1:26058455_T>C_6	TTGTGGACTTGTCCAGCTG	TRIM63_c.766T>C_p.S256P
TRIM63_1:26058455_T>C_5	TGTGGACTTGTCCAGCTGC	TRIM63_c.766T>C_p.S256P
TRIM63_1:26058455_T>C_4	GTGGACTTGTCCAGCTGCT	TRIM63_c.766T>C_p.S256P
TRIM63_1:26058455_T>C_3	TGGACTTGTCCAGCTGCTC	TRIM63_c.766T>C_p.S256P
TRIM63_1:26058455_T>C_2	GGACTTGTCCAGCTGCTCC	TRIM63_c.766T>C_p.S256P
TRIM48_11:55268368_T>C_6	ACCTGTATAATATGTCTCC	TRIM48_c.574T>C_p.Y192H
TRIM48_11:55268368_T>C_5	CCTGTATAATATGTCTCCA	TRIM48_c.574T>C_p.Y192H
TRIM48_11:55268368_T>C_4	CTGTATAATATGTCTCCAA	TRIM48_c.574T>C_p.Y192H
TRIM48_11:55268368_T>C_3	TGTATAATATGTCTCCAAA	TRIM48_c.574T>C_p.Y192H
TRIM48_11:55268368_T>C_2	GTATAATATGTCTCCAAAA	TRIM48_c.574T>C_p.Y192H
TRIM48_11:55264986_T>C_6	CAGTCTATGGTGACCGGGT	TRIM48_c.131T>C_p.I44T
TRIM48_11:55264986_T>C_5	AGTCTATGGTGACCGGGTC	TRIM48_c.131T>C_p.I44T
TRIM48_11:55264986_T>C_4	GTCTATGGTGACCGGGTCT	TRIM48_c.131T>C_p.I44T
TRIM48_11:55264986_T>C_3	TCTATGGTGACCGGGTCTA	TRIM48_c.131T>C_p.I44T
TRIM48_11:55264986_T>C_2	CTATGGTGACCGGGTCTAT	TRIM48_c.131T>C_p.I44T
TRIM11_1:228406495_T>C_6	CCGTGAAGTAGTCGAGGCA	TRIM11_c.67T>C_p.F23L
TRIM11_1:228406495_T>C_5	CGTGAAGTAGTCGAGGCAG	TRIM11_c.67T>C_p.F23L
TRIM11_1:228406495_T>C_4	GTGAAGTAGTCGAGGCAGA	TRIM11_c.67T>C_p.F23L
TRIM11_1:228406495_T>C_3	TGAAGTAGTCGAGGCAGAT	TRIM11_c.67T>C_p.F23L
TRIM11_1:228406495_T>C_2	GAAGTAGTCGAGGCAGATG	TRIM11_c.67T>C_p.F23L
TRAM2_6:52505675_A>G_6	CTGGCCATTGGCTTTGGAC	TRAM2_c.799A>G_p.I267V
TRAM2_6:52505675_A>G_5	TGGCCATTGGCTTTGGACT	TRAM2_c.799A>G_p.I267V
TRAM2_6:52505675_A>G_4	GGCCATTGGCTTTGGACTG	TRAM2_c.799A>G_p.I267V
TRAM2_6:52505675_A>G_3	GCCATTGGCTTTGGACTGG	TRAM2_c.799A>G_p.I267V
TRAM2_6:52505675_A>G_2	CCATTGGCTTTGGACTGGC	TRAM2_c.799A>G_p.I267V
TPMT_6:18130687_A>G_6	AGTTATATCTACTTACAGA	TPMT_c.719A>G_p.Y240C
TPMT_6:18130687_A>G_5	GTTATATCTACTTACAGAA	TPMT_c.719A>G_p.Y240C
TPMT_6:18130687_A>G_4	TTATATCTACTTACAGAAA	TPMT_c.719A>G_p.Y240C
TPMT_6:18130687_A>G_3	TATATCTACTTACAGAAAA	TPMT_c.719A>G_p.Y240C
TPMT_6:18130687_A>G_2	ATATCTACTTACAGAAAAG	TPMT_c.719A>G_p.Y240C
TP53_17:7675238_A>G_6	TCCTACAGTACTCCCCTGC	TP53_c.341A>G_p.K114R
TP53_17:7675238_A>G_5	CCTACAGTACTCCCCTGCC	TP53_c.341A>G_p.K114R
TP53_17:7675238_A>G_4	CTACAGTACTCCCCTGCCC	TP53_c.341A>G_p.K114R
TP53_17:7675238_A>G_3	TACAGTACTCCCCTGCCCT	TP53_c.341A>G_p.K114R
TP53_17:7675238_A>G_2	ACAGTACTCCCCTGCCCTC	TP53_c.341A>G_p.K114R
TP53_17:7675217_A>G_6	TCAACAAGATGTTTTGCCA	TP53_c.395A>G_p.K132R
TP53_17:7675217_A>G_5	CAACAAGATGTTTTGCCAA	TP53_c.395A>G_p.K132R
TP53_17:7675217_A>G_4	AACAAGATGTTTTGCCAAC	TP53_c.395A>G_p.K132R
TP53_17:7675217_A>G_3	ACAAGATGTTTTGCCAACT	TP53_c.395A>G_p.K132R
TP53_17:7675217_A>G_2	CAAGATGTTTTGCCAACTG	TP53_c.395A>G_p.K132R
TP53_17:7675125_T>C_6	GCTTGTAGATGGCCATGGC	TP53_c.487T>C_p.Y163H
TP53_17:7675125_T>C_5	CTTGTAGATGGCCATGGCG	TP53_c.487T>C_p.Y163H
TP53_17:7675125_T>C_4	TTGTAGATGGCCATGGCGC	TP53_c.487T>C_p.Y163H
TP53_17:7675125_T>C_3	TGTAGATGGCCATGGCGCG	TP53_c.487T>C_p.Y163H
TP53_17:7675125_T>C_2	GTAGATGGCCATGGCGCGG	TP53_c.487T>C_p.Y163H
TP53_17:7675124_A>G_6	CCATCTACAAGCAGTCACA	TP53_c.488A>G	c.371A>G_p.Y163C	p.Y124C
TP53_17:7675124_A>G_5	CATCTACAAGCAGTCACAG	TP53_c.488A>G	c.371A>G_p.Y163C	p.Y124C
TP53_17:7675124_A>G_4	ATCTACAAGCAGTCACAGC	TP53_c.488A>G	c.371A>G_p.Y163C	p.Y124C
TP53_17:7675124_A>G_3	TCTACAAGCAGTCACAGCA	TP53_c.488A>G	c.371A>G_p.Y163C	p.Y124C
TP53_17:7675124_A>G_2	CTACAAGCAGTCACAGCAC	TP53_c.488A>G	c.371A>G_p.Y163C	p.Y124C
TP53_17:7675109_A>G_6	CACAGCACATGACGGAGGT	TP53_c.503A>G_p.H168R
TP53_17:7675109_A>G_5	ACAGCACATGACGGAGGTT	TP53_c.503A>G_p.H168R
TP53_17:7675109_A>G_4	CAGCACATGACGGAGGTTG	TP53_c.503A>G_p.H168R
TP53_17:7675109_A>G_3	AGCACATGACGGAGGTTGT	TP53_c.503A>G_p.H168R
TP53_17:7675109_A>G_2	GCACATGACGGAGGTTGTG	TP53_c.503A>G_p.H168R
TP53_17:7675076_A>G_6	CCCACCATGAGCGCTGCTC	TP53_c.536A>G	c.419A>G_p.H179R	p.H140R
TP53_17:7675076_A>G_5	CCACCATGAGCGCTGCTCA	TP53_c.536A>G	c.419A>G_p.H179R	p.H140R
TP53_17:7675076_A>G_4	CACCATGAGCGCTGCTCAG	TP53_c.536A>G	c.419A>G_p.H179R	p.H140R
TP53_17:7675076_A>G_3	ACCATGAGCGCTGCTCAGA	TP53_c.536A>G	c.419A>G_p.H179R	p.H140R
TP53_17:7675076_A>G_2	CCATGAGCGCTGCTCAGAT	TP53_c.536A>G	c.419A>G_p.H179R	p.H140R
TP53_17:7674953_A>G_6	CTCAGCATCTTATCCGAGT	TP53_c.578A>G	c.461A>G_p.H193R	p.H154R
TP53_17:7674953_A>G_5	TCAGCATCTTATCCGAGTG	TP53_c.578A>G	c.461A>G_p.H193R	p.H154R
TP53_17:7674953_A>G_4	CAGCATCTTATCCGAGTGG	TP53_c.578A>G	c.461A>G_p.H193R	p.H154R
TP53_17:7674953_A>G_3	AGCATCTTATCCGAGTGGA	TP53_c.578A>G	c.461A>G_p.H193R	p.H154R
TP53_17:7674953_A>G_2	GCATCTTATCCGAGTGGAA	TP53_c.578A>G	c.461A>G_p.H193R	p.H154R
TP53_17:7674947_T>C_6	ACTCGGATAAGATGCTGAG	TP53_c.467T>C_p.I156T
TP53_17:7674947_T>C_5	CTCGGATAAGATGCTGAGG	TP53_c.467T>C_p.I156T
TP53_17:7674947_T>C_4	TCGGATAAGATGCTGAGGA	TP53_c.467T>C_p.I156T
TP53_17:7674947_T>C_3	CGGATAAGATGCTGAGGAG	TP53_c.467T>C_p.I156T
TP53_17:7674947_T>C_2	GGATAAGATGCTGAGGAGG	TP53_c.467T>C_p.I156T
TP53_17:7674917_A>G_6	TGGAGTATTTGGATGACAG	TP53_c.614A>G_p.Y205C
TP53_17:7674917_A>G_5	GGAGTATTTGGATGACAGA	TP53_c.614A>G_p.Y205C
TP53_17:7674917_A>G_4	GAGTATTTGGATGACAGAA	TP53_c.614A>G_p.Y205C
TP53_17:7674917_A>G_3	AGTATTTGGATGACAGAAA	TP53_c.614A>G_p.Y205C
TP53_17:7674917_A>G_2	GTATTTGGATGACAGAAAC	TP53_c.614A>G_p.Y205C
TP53_17:7674890_A>G_6	TTCGACATAGTGTGGTGGT	TP53_c.641A>G	c.524A>G_p.H214R	p.H175R
TP53_17:7674890_A>G_5	TCGACATAGTGTGGTGGTG	TP53_c.641A>G	c.524A>G_p.H214R	p.H175R
TP53_17:7674890_A>G_4	CGACATAGTGTGGTGGTGC	TP53_c.641A>G	c.524A>G_p.H214R	p.H175R
TP53_17:7674890_A>G_3	GACATAGTGTGGTGGTGCC	TP53_c.641A>G	c.524A>G_p.H214R	p.H175R
TP53_17:7674890_A>G_2	ACATAGTGTGGTGGTGCCC	TP53_c.641A>G	c.524A>G_p.H214R	p.H175R
TP53_17:7674888_A>G_6	CGACATAGTGTGGTGGTGC	TP53_c.643A>G_p.S215G
TP53_17:7674888_A>G_5	GACATAGTGTGGTGGTGCC	TP53_c.643A>G_p.S215G
TP53_17:7674888_A>G_4	ACATAGTGTGGTGGTGCCC	TP53_c.643A>G_p.S215G
TP53_17:7674888_A>G_3	CATAGTGTGGTGGTGCCCT	TP53_c.643A>G_p.S215G
TP53_17:7674888_A>G_2	ATAGTGTGGTGGTGCCCTA	TP53_c.643A>G_p.S215G
TP53_17:7674872_A>G_6	TGCCCTATGAGCCGCCTGA	TP53_c.659A>G	c.542A>G_p.Y220C	p.Y181C
TP53_17:7674872_A>G_5	GCCCTATGAGCCGCCTGAG	TP53_c.659A>G	c.542A>G_p.Y220C	p.Y181C
TP53_17:7674872_A>G_4	CCCTATGAGCCGCCTGAGG	TP53_c.659A>G	c.542A>G_p.Y220C	p.Y181C
TP53_17:7674872_A>G_3	CCTATGAGCCGCCTGAGGT	TP53_c.659A>G	c.542A>G_p.Y220C	p.Y181C
TP53_17:7674872_A>G_2	CTATGAGCCGCCTGAGGTC	TP53_c.659A>G	c.542A>G_p.Y220C	p.Y181C
TP53_17:7674263_T>C_6	AGTTGTAGTGGATGGTGGT	TP53_c.583T>C_p.Y195H
TP53_17:7674263_T>C_5	GTTGTAGTGGATGGTGGTA	TP53_c.583T>C_p.Y195H
TP53_17:7674263_T>C_4	TTGTAGTGGATGGTGGTAC	TP53_c.583T>C_p.Y195H
TP53_17:7674263_T>C_3	TGTAGTGGATGGTGGTACA	TP53_c.583T>C_p.Y195H
TP53_17:7674263_T>C_2	GTAGTGGATGGTGGTACAG	TP53_c.583T>C_p.Y195H
TP53_17:7674262_A>G_6	TCCACTACAACTACATGTG	TP53_c.701A>G	c.584A>G_p.Y234C	p.Y195C
TP53_17:7674262_A>G_5	CCACTACAACTACATGTGT	TP53_c.701A>G	c.584A>G_p.Y234C	p.Y195C
TP53_17:7674262_A>G_4	CACTACAACTACATGTGTA	TP53_c.701A>G	c.584A>G_p.Y234C	p.Y195C
TP53_17:7674262_A>G_3	ACTACAACTACATGTGTAA	TP53_c.701A>G	c.584A>G_p.Y234C	p.Y195C
TP53_17:7674262_A>G_2	CTACAACTACATGTGTAAC	TP53_c.701A>G	c.584A>G_p.Y234C	p.Y195C
TP53_17:7674256_A>G_6	ACAACTACATGTGTAACAG	TP53_c.707A>G	c.590A>G_p.Y236C	p.Y197C
TP53_17:7674256_A>G_5	CAACTACATGTGTAACAGT	TP53_c.707A>G	c.590A>G_p.Y236C	p.Y197C
TP53_17:7674256_A>G_4	AACTACATGTGTAACAGTT	TP53_c.707A>G	c.590A>G_p.Y236C	p.Y197C
TP53_17:7674256_A>G_3	ACTACATGTGTAACAGTTC	TP53_c.707A>G	c.590A>G_p.Y236C	p.Y197C
TP53_17:7674256_A>G_2	CTACATGTGTAACAGTTCC	TP53_c.707A>G	c.590A>G_p.Y236C	p.Y197C
TP53_17:7674251_T>C_6	TGTTACACATGTAGTTGTA	TP53_c.712T>C_p.C238R
TP53_17:7674251_T>C_5	GTTACACATGTAGTTGTAG	TP53_c.712T>C_p.C238R
TP53_17:7674251_T>C_4	TTACACATGTAGTTGTAGT	TP53_c.712T>C_p.C238R
TP53_17:7674251_T>C_3	TACACATGTAGTTGTAGTG	TP53_c.712T>C_p.C238R
TP53_17:7674251_T>C_2	ACACATGTAGTTGTAGTGG	TP53_c.712T>C_p.C238R
TP53_17:7674227_A>G_6	GGCGGCATGAACCGGAGGC	TP53_c.736A>G_p.M246V
TP53_17:7674227_A>G_5	GCGGCATGAACCGGAGGCC	TP53_c.736A>G_p.M246V
TP53_17:7674227_A>G_4	CGGCATGAACCGGAGGCCC	TP53_c.736A>G_p.M246V
TP53_17:7674227_A>G_3	GGCATGAACCGGAGGCCCA	TP53_c.736A>G_p.M246V
TP53_17:7674227_A>G_2	GCATGAACCGGAGGCCCAT	TP53_c.736A>G_p.M246V
TP53_17:7674226_T>C_6	CGGTTCATGCCGCCCATGC	TP53_c.737T>C_p.M246T
TP53_17:7674226_T>C_5	GGTTCATGCCGCCCATGCA	TP53_c.737T>C_p.M246T
TP53_17:7674226_T>C_4	GTTCATGCCGCCCATGCAG	TP53_c.737T>C_p.M246T
TP53_17:7674226_T>C_3	TTCATGCCGCCCATGCAGG	TP53_c.737T>C_p.M246T
TP53_17:7674226_T>C_2	TCATGCCGCCCATGCAGGA	TP53_c.737T>C_p.M246T
TP53_17:7674223_A>G_6	GCATGAACCGGAGGCCCAT	TP53_c.740A>G_p.N247S
TP53_17:7674223_A>G_5	CATGAACCGGAGGCCCATC	TP53_c.740A>G_p.N247S
TP53_17:7674223_A>G_4	ATGAACCGGAGGCCCATCC	TP53_c.740A>G_p.N247S
TP53_17:7674223_A>G_3	TGAACCGGAGGCCCATCCT	TP53_c.740A>G_p.N247S
TP53_17:7674223_A>G_2	GAACCGGAGGCCCATCCTC	TP53_c.740A>G_p.N247S
TP53_17:7674218_A>G_6	AACCGGAGGCCCATCCTCA	TP53_c.745A>G_p.R249G
TP53_17:7674218_A>G_5	ACCGGAGGCCCATCCTCAC	TP53_c.745A>G_p.R249G
TP53_17:7674218_A>G_4	CCGGAGGCCCATCCTCACC	TP53_c.745A>G_p.R249G
TP53_17:7674218_A>G_3	CGGAGGCCCATCCTCACCA	TP53_c.745A>G_p.R249G
TP53_17:7674218_A>G_2	GGAGGCCCATCCTCACCAT	TP53_c.745A>G_p.R249G
TP53_17:7674208_T>C_6	ATGGTGAGGATGGGCCTCC	TP53_c.755T>C_p.L252P
TP53_17:7674208_T>C_5	TGGTGAGGATGGGCCTCCG	TP53_c.755T>C_p.L252P
TP53_17:7674208_T>C_4	GGTGAGGATGGGCCTCCGG	TP53_c.755T>C_p.L252P
TP53_17:7674208_T>C_3	GTGAGGATGGGCCTCCGGT	TP53_c.755T>C_p.L252P
TP53_17:7674208_T>C_2	TGAGGATGGGCCTCCGGTT	TP53_c.755T>C_p.L252P
TP53_17:7674190_A>G_6	CACTGGAAGACTCCAGGTC	TP53_c.773A>G_p.E258G
TP53_17:7674190_A>G_5	ACTGGAAGACTCCAGGTCA	TP53_c.773A>G_p.E258G
TP53_17:7674190_A>G_4	CTGGAAGACTCCAGGTCAG	TP53_c.773A>G_p.E258G
TP53_17:7674190_A>G_3	TGGAAGACTCCAGGTCAGG	TP53_c.773A>G_p.E258G
TP53_17:7674190_A>G_2	GGAAGACTCCAGGTCAGGA	TP53_c.773A>G_p.E258G
TP53_17:7673799_T>C_6	GCACAAACACGCACCTCAA	TP53_c.821T>C_p.V274A
TP53_17:7673799_T>C_5	CACAAACACGCACCTCAAA	TP53_c.821T>C_p.V274A
TP53_17:7673799_T>C_4	ACAAACACGCACCTCAAAG	TP53_c.821T>C_p.V274A
TP53_17:7673799_T>C_3	CAAACACGCACCTCAAAGC	TP53_c.821T>C_p.V274A
TP53_17:7673799_T>C_2	AAACACGCACCTCAAAGCT	TP53_c.821T>C_p.V274A
TP53_17:7673797_T>C_6	AGGCACAAACACGCACCTC	TP53_c.823T>C	c.706T>C_p.C275R	p.C236R
TP53_17:7673797_T>C_5	GGCACAAACACGCACCTCA	TP53_c.823T>C	c.706T>C_p.C275R	p.C236R
TP53_17:7673797_T>C_4	GCACAAACACGCACCTCAA	TP53_c.823T>C	c.706T>C_p.C275R	p.C236R
TP53_17:7673797_T>C_3	CACAAACACGCACCTCAAA	TP53_c.823T>C	c.706T>C_p.C275R	p.C236R
TP53_17:7673797_T>C_2	ACAAACACGCACCTCAAAG	TP53_c.823T>C	c.706T>C_p.C275R	p.C236R
TP53_17:7673782_A>G_6	CCTGGGAGAGACCGGCGCA	TP53_c.721A>G	c.838A>G_p.R241G	p.R280G
TP53_17:7673782_A>G_5	CTGGGAGAGACCGGCGCAC	TP53_c.721A>G	c.838A>G_p.R241G	p.R280G
TP53_17:7673782_A>G_4	TGGGAGAGACCGGCGCACA	TP53_c.721A>G	c.838A>G_p.R241G	p.R280G
TP53_17:7673782_A>G_3	GGGAGAGACCGGCGCACAG	TP53_c.721A>G	c.838A>G_p.R241G	p.R280G
TP53_17:7673782_A>G_2	GGAGAGACCGGCGCACAGA	TP53_c.721A>G	c.838A>G_p.R241G	p.R280G
TP53_17:7673778_A>G_6	GGAGAGACCGGCGCACAGA	TP53_c.725A>G_p.D242G
TP53_17:7673778_A>G_5	GAGAGACCGGCGCACAGAG	TP53_c.725A>G_p.D242G
TP53_17:7673778_A>G_4	AGAGACCGGCGCACAGAGG	TP53_c.725A>G_p.D242G
TP53_17:7673778_A>G_3	GAGACCGGCGCACAGAGGA	TP53_c.725A>G_p.D242G
TP53_17:7673778_A>G_2	AGACCGGCGCACAGAGGAA	TP53_c.725A>G_p.D242G
TP53_17:7673766_A>G_6	GCACAGAGGAAGAGAATCT	TP53_c.854A>G_p.E285G
TP53_17:7673766_A>G_5	CACAGAGGAAGAGAATCTC	TP53_c.854A>G_p.E285G
TP53_17:7673766_A>G_4	ACAGAGGAAGAGAATCTCC	TP53_c.854A>G_p.E285G
TP53_17:7673766_A>G_3	CAGAGGAAGAGAATCTCCG	TP53_c.854A>G_p.E285G
TP53_17:7673766_A>G_2	AGAGGAAGAGAATCTCCGC	TP53_c.854A>G_p.E285G
TOB1_17:50863809_A>G_6	TTGAACAAGCATCCAAAGA	TOB1_c.209A>G_p.Q70R
TOB1_17:50863809_A>G_5	TGAACAAGCATCCAAAGAG	TOB1_c.209A>G_p.Q70R
TOB1_17:50863809_A>G_4	GAACAAGCATCCAAAGAGA	TOB1_c.209A>G_p.Q70R
TOB1_17:50863809_A>G_3	AACAAGCATCCAAAGAGAG	TOB1_c.209A>G_p.Q70R
TOB1_17:50863809_A>G_2	ACAAGCATCCAAAGAGAGT	TOB1_c.209A>G_p.Q70R
TMEM225B_7:99604462_A>G_6	TAGGCTACCTGATTATACT	TMEM225B_c.74A>G_p.Y25C
TMEM225B_7:99604462_A>G_5	AGGCTACCTGATTATACTG	TMEM225B_c.74A>G_p.Y25C
TMEM225B_7:99604462_A>G_4	GGCTACCTGATTATACTGG	TMEM225B_c.74A>G_p.Y25C
TMEM225B_7:99604462_A>G_3	GCTACCTGATTATACTGGT	TMEM225B_c.74A>G_p.Y25C
TMEM225B_7:99604462_A>G_2	CTACCTGATTATACTGGTG	TMEM225B_c.74A>G_p.Y25C
TMEM192_4:165079755_A>G_6	AAGGAGACACCATTGAATA	TMEM192_c.719A>G_p.D240G
TMEM192_4:165079755_A>G_5	AGGAGACACCATTGAATAC	TMEM192_c.719A>G_p.D240G
TMEM192_4:165079755_A>G_4	GGAGACACCATTGAATACC	TMEM192_c.719A>G_p.D240G
TMEM192_4:165079755_A>G_3	GAGACACCATTGAATACCT	TMEM192_c.719A>G_p.D240G
TMEM192_4:165079755_A>G_2	AGACACCATTGAATACCTG	TMEM192_c.719A>G_p.D240G
TMEM156_4:39032310_A>G_6	GACATGACAAAAACAGCCC	TMEM156_c.4A>G_p.T2A
TMEM156_4:39032310_A>G_5	ACATGACAAAAACAGCCCT	TMEM156_c.4A>G_p.T2A
TMEM156_4:39032310_A>G_4	CATGACAAAAACAGCCCTC	TMEM156_c.4A>G_p.T2A
TMEM156_4:39032310_A>G_3	ATGACAAAAACAGCCCTCC	TMEM156_c.4A>G_p.T2A
TMEM156_4:39032310_A>G_2	TGACAAAAACAGCCCTCCT	TMEM156_c.4A>G_p.T2A
TMEM132C_12:128415385_A>G_6	GACTTCAGGAAGGGCAACG	TMEM132C_c.739A>G_p.R247G
TMEM132C_12:128415385_A>G_5	ACTTCAGGAAGGGCAACGC	TMEM132C_c.739A>G_p.R247G
TMEM132C_12:128415385_A>G_4	CTTCAGGAAGGGCAACGCC	TMEM132C_c.739A>G_p.R247G
TMEM132C_12:128415385_A>G_3	TTCAGGAAGGGCAACGCCA	TMEM132C_c.739A>G_p.R247G
TMEM132C_12:128415385_A>G_2	TCAGGAAGGGCAACGCCAT	TMEM132C_c.739A>G_p.R247G
TIMP2_17:78924994_T>C_6	GGGTGCACCGGGGAGCAGC	TIMP2_c.95T>C_p.V32A
TIMP2_17:78924994_T>C_5	GGTGCACCGGGGAGCAGCT	TIMP2_c.95T>C_p.V32A
TIMP2_17:78924994_T>C_4	GTGCACCGGGGAGCAGCTG	TIMP2_c.95T>C_p.V32A
TIMP2_17:78924994_T>C_3	TGCACCGGGGAGCAGCTGC	TIMP2_c.95T>C_p.V32A
TIMP2_17:78924994_T>C_2	GCACCGGGGAGCAGCTGCA	TIMP2_c.95T>C_p.V32A
TIA1_2:70214430_A>G_6	CACAACAAATTGGCCAGTA	TIA1_c.953A>G_p.Q318R
TIA1_2:70214430_A>G_5	ACAACAAATTGGCCAGTAT	TIA1_c.953A>G_p.Q318R
TIA1_2:70214430_A>G_4	CAACAAATTGGCCAGTATA	TIA1_c.953A>G_p.Q318R
TIA1_2:70214430_A>G_3	AACAAATTGGCCAGTATAT	TIA1_c.953A>G_p.Q318R
TIA1_2:70214430_A>G_2	ACAAATTGGCCAGTATATG	TIA1_c.953A>G_p.Q318R
TGFBRAP1_2:105307884_A>G_6	GTTTGCATCATCTCTGTCA	TGFBRAP1_c.418A>G_p.I140V
TGFBRAP1_2:105307884_A>G_5	TTTGCATCATCTCTGTCAA	TGFBRAP1_c.418A>G_p.I140V
TGFBRAP1_2:105307884_A>G_4	TTGCATCATCTCTGTCAAA	TGFBRAP1_c.418A>G_p.I140V
TGFBRAP1_2:105307884_A>G_3	TGCATCATCTCTGTCAAAC	TGFBRAP1_c.418A>G_p.I140V
TGFBRAP1_2:105307884_A>G_2	GCATCATCTCTGTCAAACG	TGFBRAP1_c.418A>G_p.I140V
TEX37_2:88529418_A>G_6	TGCCATATAGTCAAGGTCC	TEX37_c.487A>G_p.I163V
TEX37_2:88529418_A>G_5	GCCATATAGTCAAGGTCCC	TEX37_c.487A>G_p.I163V
TEX37_2:88529418_A>G_4	CCATATAGTCAAGGTCCCC	TEX37_c.487A>G_p.I163V
TEX37_2:88529418_A>G_3	CATATAGTCAAGGTCCCCA	TEX37_c.487A>G_p.I163V
TEX37_2:88529418_A>G_2	ATATAGTCAAGGTCCCCAT	TEX37_c.487A>G_p.I163V
TET1_10:68646045_A>G_6	CCAACAAGCCTTGTCACAT	TET1_c.3316A>G_p.S1106G
TET1_10:68646045_A>G_5	CAACAAGCCTTGTCACATG	TET1_c.3316A>G_p.S1106G
TET1_10:68646045_A>G_4	AACAAGCCTTGTCACATGT	TET1_c.3316A>G_p.S1106G
TET1_10:68646045_A>G_3	ACAAGCCTTGTCACATGTA	TET1_c.3316A>G_p.S1106G
TET1_10:68646045_A>G_2	CAAGCCTTGTCACATGTAA	TET1_c.3316A>G_p.S1106G
TESC_12:117046656_A>G_6	TCGAGGAGCTGCTGTCGGG	TESC_c.422A>G_p.E141G
TESC_12:117046656_A>G_5	CGAGGAGCTGCTGTCGGGA	TESC_c.422A>G_p.E141G
TESC_12:117046656_A>G_4	GAGGAGCTGCTGTCGGGAA	TESC_c.422A>G_p.E141G
TESC_12:117046656_A>G_3	AGGAGCTGCTGTCGGGAAA	TESC_c.422A>G_p.E141G
TESC_12:117046656_A>G_2	GGAGCTGCTGTCGGGAAAC	TESC_c.422A>G_p.E141G
TDRD15_2:21138931_A>G_6	TTTTATAGCATATGTATTA	TDRD15_c.1464A>G_p.I488M
TDRD15_2:21138931_A>G_5	TTTATAGCATATGTATTAA	TDRD15_c.1464A>G_p.I488M
TDRD15_2:21138931_A>G_4	TTATAGCATATGTATTAAA	TDRD15_c.1464A>G_p.I488M
TDRD15_2:21138931_A>G_3	TATAGCATATGTATTAAAC	TDRD15_c.1464A>G_p.I488M
TDRD15_2:21138931_A>G_2	ATAGCATATGTATTAAACC	TDRD15_c.1464A>G_p.I488M
TAF4B_18:26285883_A>G_6	TCCAGAAAAGCGTGGTTGC	TAF4B_c.974A>G_p.K325R
TAF4B_18:26285883_A>G_5	CCAGAAAAGCGTGGTTGCC	TAF4B_c.974A>G_p.K325R
TAF4B_18:26285883_A>G_4	CAGAAAAGCGTGGTTGCCT	TAF4B_c.974A>G_p.K325R
TAF4B_18:26285883_A>G_3	AGAAAAGCGTGGTTGCCTT	TAF4B_c.974A>G_p.K325R
TAF4B_18:26285883_A>G_2	GAAAAGCGTGGTTGCCTTA	TAF4B_c.974A>G_p.K325R
TACR1_2:75049611_T>C_6	CTTTGTACACACTGCCCTG	TACR1_c.1045T>C_p.Y349H
TACR1_2:75049611_T>C_5	TTTGTACACACTGCCCTGG	TACR1_c.1045T>C_p.Y349H
TACR1_2:75049611_T>C_4	TTGTACACACTGCCCTGGG	TACR1_c.1045T>C_p.Y349H
TACR1_2:75049611_T>C_3	TGTACACACTGCCCTGGGT	TACR1_c.1045T>C_p.Y349H
TACR1_2:75049611_T>C_2	GTACACACTGCCCTGGGTC	TACR1_c.1045T>C_p.Y349H
SYNJ1_21:32695194_A>G_6	GAAATCAGAACAATTTATG	SYNJ1_c.685A>G_p.R229G
SYNJ1_21:32695194_A>G_5	AAATCAGAACAATTTATGC	SYNJ1_c.685A>G_p.R229G
SYNJ1_21:32695194_A>G_4	AATCAGAACAATTTATGCT	SYNJ1_c.685A>G_p.R229G
SYNJ1_21:32695194_A>G_3	ATCAGAACAATTTATGCTG	SYNJ1_c.685A>G_p.R229G
SYNJ1_21:32695194_A>G_2	TCAGAACAATTTATGCTGC	SYNJ1_c.685A>G_p.R229G
SYNDIG1_20:24584863_A>G_6	GCGACTACTCAAGCGACAC	SYNDIG1_c.488A>G_p.Y163C
SYNDIG1_20:24584863_A>G_5	CGACTACTCAAGCGACACA	SYNDIG1_c.488A>G_p.Y163C
SYNDIG1_20:24584863_A>G_4	GACTACTCAAGCGACACAG	SYNDIG1_c.488A>G_p.Y163C
SYNDIG1_20:24584863_A>G_3	ACTACTCAAGCGACACAGA	SYNDIG1_c.488A>G_p.Y163C
SYNDIG1_20:24584863_A>G_2	CTACTCAAGCGACACAGAG	SYNDIG1_c.488A>G_p.Y163C
SULT1A2_16:28592475_A>G_6	CAATCCAAGCCTCCACTGA	SULT1A2_c.464A>G_p.Q155R
SULT1A2_16:28592475_A>G_5	AATCCAAGCCTCCACTGAG	SULT1A2_c.464A>G_p.Q155R
SULT1A2_16:28592475_A>G_4	ATCCAAGCCTCCACTGAGG	SULT1A2_c.464A>G_p.Q155R
SULT1A2_16:28592475_A>G_3	TCCAAGCCTCCACTGAGGA	SULT1A2_c.464A>G_p.Q155R
SULT1A2_16:28592475_A>G_2	CCAAGCCTCCACTGAGGAG	SULT1A2_c.464A>G_p.Q155R
STX11_6:144187022_A>G_6	CGCAGTACAACGCGCTCAC	STX11_c.395A>G_p.Y132C
STX11_6:144187022_A>G_5	GCAGTACAACGCGCTCACC	STX11_c.395A>G_p.Y132C
STX11_6:144187022_A>G_4	CAGTACAACGCGCTCACCC	STX11_c.395A>G_p.Y132C
STX11_6:144187022_A>G_3	AGTACAACGCGCTCACCCT	STX11_c.395A>G_p.Y132C
STX11_6:144187022_A>G_2	GTACAACGCGCTCACCCTC	STX11_c.395A>G_p.Y132C
STRIP1_1:110045049_A>G_6	AGGCCAATCCACGAAAGCA	STRIP1_c.1387A>G_p.I463V
STRIP1_1:110045049_A>G_5	GGCCAATCCACGAAAGCAT	STRIP1_c.1387A>G_p.I463V
STRIP1_1:110045049_A>G_4	GCCAATCCACGAAAGCATC	STRIP1_c.1387A>G_p.I463V
STRIP1_1:110045049_A>G_3	CCAATCCACGAAAGCATCA	STRIP1_c.1387A>G_p.I463V
STRIP1_1:110045049_A>G_2	CAATCCACGAAAGCATCAA	STRIP1_c.1387A>G_p.I463V
STKLD1_9:133401744_T>C_6	TGGTGCACCAGCGCTGCTC	STKLD1_c.1205T>C_p.V402A
STKLD1_9:133401744_T>C_5	GGTGCACCAGCGCTGCTCA	STKLD1_c.1205T>C_p.V402A
STKLD1_9:133401744_T>C_4	GTGCACCAGCGCTGCTCAA	STKLD1_c.1205T>C_p.V402A
STKLD1_9:133401744_T>C_3	TGCACCAGCGCTGCTCAAG	STKLD1_c.1205T>C_p.V402A
STKLD1_9:133401744_T>C_2	GCACCAGCGCTGCTCAAGC	STKLD1_c.1205T>C_p.V402A
STAB1_3:52519271_T>C_6	AGGTATATGCTGCCCTGGG	STAB1_c.5042T>C_p.I1681T
STAB1_3:52519271_T>C_5	GGTATATGCTGCCCTGGGG	STAB1_c.5042T>C_p.I1681T
STAB1_3:52519271_T>C_4	GTATATGCTGCCCTGGGGG	STAB1_c.5042T>C_p.I1681T
STAB1_3:52519271_T>C_3	TATATGCTGCCCTGGGGGC	STAB1_c.5042T>C_p.I1681T
STAB1_3:52519271_T>C_2	ATATGCTGCCCTGGGGGCG	STAB1_c.5042T>C_p.I1681T
ST5_11:8726078_T>C_6	CCCACAATATCTTCATAGG	ST5_c.1472T>C_p.I491T
ST5_11:8726078_T>C_5	CCACAATATCTTCATAGGC	ST5_c.1472T>C_p.I491T
ST5_11:8726078_T>C_4	CACAATATCTTCATAGGCA	ST5_c.1472T>C_p.I491T
ST5_11:8726078_T>C_3	ACAATATCTTCATAGGCAT	ST5_c.1472T>C_p.I491T
ST5_11:8726078_T>C_2	CAATATCTTCATAGGCATT	ST5_c.1472T>C_p.I491T
ST3GAL3_1:43898252_A>G_6	AAAGCCATCTTGTCAGTCA	ST3GAL3_c.622A>G_p.I208V
ST3GAL3_1:43898252_A>G_5	AAGCCATCTTGTCAGTCAC	ST3GAL3_c.622A>G_p.I208V
ST3GAL3_1:43898252_A>G_4	AGCCATCTTGTCAGTCACC	ST3GAL3_c.622A>G_p.I208V
ST3GAL3_1:43898252_A>G_3	GCCATCTTGTCAGTCACCA	ST3GAL3_c.622A>G_p.I208V
ST3GAL3_1:43898252_A>G_2	CCATCTTGTCAGTCACCAA	ST3GAL3_c.622A>G_p.I208V
SRBD1_2:45488246_A>G_6	TTGAGAAGTGCAGGTAAGA	SRBD1_c.1960A>G_p.S654G
SRBD1_2:45488246_A>G_5	TGAGAAGTGCAGGTAAGAA	SRBD1_c.1960A>G_p.S654G
SRBD1_2:45488246_A>G_4	GAGAAGTGCAGGTAAGAAA	SRBD1_c.1960A>G_p.S654G
SRBD1_2:45488246_A>G_3	AGAAGTGCAGGTAAGAAAC	SRBD1_c.1960A>G_p.S654G
SRBD1_2:45488246_A>G_2	GAAGTGCAGGTAAGAAACT	SRBD1_c.1960A>G_p.S654G
SQLE_8:125020817_T>C_6	AAATAAAGAAAACAGGCTT	SQLE_c.1478T>C_p.L493P
SQLE_8:125020817_T>C_5	AATAAAGAAAACAGGCTTT	SQLE_c.1478T>C_p.L493P
SQLE_8:125020817_T>C_4	ATAAAGAAAACAGGCTTTT	SQLE_c.1478T>C_p.L493P
SQLE_8:125020817_T>C_3	TAAAGAAAACAGGCTTTTC	SQLE_c.1478T>C_p.L493P
SQLE_8:125020817_T>C_2	AAAGAAAACAGGCTTTTCT	SQLE_c.1478T>C_p.L493P
SPATA4_4:176192708_A>G_6	CCCAACATGCTGACCAATG	SPATA4_c.607A>G_p.M203V
SPATA4_4:176192708_A>G_5	CCAACATGCTGACCAATGA	SPATA4_c.607A>G_p.M203V
SPATA4_4:176192708_A>G_4	CAACATGCTGACCAATGAA	SPATA4_c.607A>G_p.M203V
SPATA4_4:176192708_A>G_3	AACATGCTGACCAATGAAC	SPATA4_c.607A>G_p.M203V
SPATA4_4:176192708_A>G_2	ACATGCTGACCAATGAACT	SPATA4_c.607A>G_p.M203V
SPAG11A_8:7860362_A>G_6	CTCACCAGGAGGCTCGAGG	SPAG11A_c.230A>G_p.Q77R
SPAG11A_8:7860362_A>G_5	TCACCAGGAGGCTCGAGGA	SPAG11A_c.230A>G_p.Q77R
SPAG11A_8:7860362_A>G_4	CACCAGGAGGCTCGAGGAC	SPAG11A_c.230A>G_p.Q77R
SPAG11A_8:7860362_A>G_3	ACCAGGAGGCTCGAGGACC	SPAG11A_c.230A>G_p.Q77R
SPAG11A_8:7860362_A>G_2	CCAGGAGGCTCGAGGACCC	SPAG11A_c.230A>G_p.Q77R
SNX16_8:81839722_A>G_6	TCTACTAGACCAAGAGACA	SNX16_c.265A>G_p.R89G
SNX16_8:81839722_A>G_5	CTACTAGACCAAGAGACAC	SNX16_c.265A>G_p.R89G
SNX16_8:81839722_A>G_4	TACTAGACCAAGAGACACT	SNX16_c.265A>G_p.R89G
SNX16_8:81839722_A>G_3	ACTAGACCAAGAGACACTG	SNX16_c.265A>G_p.R89G
SNX16_8:81839722_A>G_2	CTAGACCAAGAGACACTGA	SNX16_c.265A>G_p.R89G
SNRPB_20:2467647_A>G_6	CACATGAATTTGATCCTCT	SNRPB_c.115A>G_p.N39D
SNRPB_20:2467647_A>G_5	ACATGAATTTGATCCTCTG	SNRPB_c.115A>G_p.N39D
SNRPB_20:2467647_A>G_4	CATGAATTTGATCCTCTGT	SNRPB_c.115A>G_p.N39D
SNRPB_20:2467647_A>G_3	ATGAATTTGATCCTCTGTG	SNRPB_c.115A>G_p.N39D
SNRPB_20:2467647_A>G_2	TGAATTTGATCCTCTGTGA	SNRPB_c.115A>G_p.N39D
SNCAIP_5:122403851_A>G_6	CGCAAAACGAAGACAGATC	SNCAIP_c.257A>G_p.N86S
SNCAIP_5:122403851_A>G_5	GCAAAACGAAGACAGATCA	SNCAIP_c.257A>G_p.N86S
SNCAIP_5:122403851_A>G_4	CAAAACGAAGACAGATCAG	SNCAIP_c.257A>G_p.N86S
SNCAIP_5:122403851_A>G_3	AAAACGAAGACAGATCAGG	SNCAIP_c.257A>G_p.N86S
SNCAIP_5:122403851_A>G_2	AAACGAAGACAGATCAGGT	SNCAIP_c.257A>G_p.N86S
SMOC1_14:69977962_A>G_6	GGAAGGAAAGGTGAGTGGA	SMOC1_c.523A>G_p.K175E
SMOC1_14:69977962_A>G_5	GAAGGAAAGGTGAGTGGAG	SMOC1_c.523A>G_p.K175E
SMOC1_14:69977962_A>G_4	AAGGAAAGGTGAGTGGAGT	SMOC1_c.523A>G_p.K175E
SMOC1_14:69977962_A>G_3	AGGAAAGGTGAGTGGAGTT	SMOC1_c.523A>G_p.K175E
SMOC1_14:69977962_A>G_2	GGAAAGGTGAGTGGAGTTT	SMOC1_c.523A>G_p.K175E
SMARCA4_19:10984254_T>C_6	CCGGCGAGGGACCCGGGCT	SMARCA4_c.103T>C_p.S35P
SMARCA4_19:10984254_T>C_5	CGGCGAGGGACCCGGGCTA	SMARCA4_c.103T>C_p.S35P
SMARCA4_19:10984254_T>C_4	GGCGAGGGACCCGGGCTAG	SMARCA4_c.103T>C_p.S35P
SMARCA4_19:10984254_T>C_3	GCGAGGGACCCGGGCTAGG	SMARCA4_c.103T>C_p.S35P
SMARCA4_19:10984254_T>C_2	CGAGGGACCCGGGCTAGGG	SMARCA4_c.103T>C_p.S35P
SMAD7_18:48950022_A>G_6	GACTGCAGGCTGGGCCCGG	SMAD7_c.403A>G_p.R135G
SMAD7_18:48950022_A>G_5	ACTGCAGGCTGGGCCCGGG	SMAD7_c.403A>G_p.R135G
SMAD7_18:48950022_A>G_4	CTGCAGGCTGGGCCCGGGG	SMAD7_c.403A>G_p.R135G
SMAD7_18:48950022_A>G_3	TGCAGGCTGGGCCCGGGGG	SMAD7_c.403A>G_p.R135G
SMAD7_18:48950022_A>G_2	GCAGGCTGGGCCCGGGGGC	SMAD7_c.403A>G_p.R135G
SLC35E4_22:30636640_T>C_6	GGCTTGACATGCTGGCTCC	SLC35E4_c.190T>C_p.S64P
SLC35E4_22:30636640_T>C_5	GCTTGACATGCTGGCTCCC	SLC35E4_c.190T>C_p.S64P
SLC35E4_22:30636640_T>C_4	CTTGACATGCTGGCTCCCG	SLC35E4_c.190T>C_p.S64P
SLC35E4_22:30636640_T>C_3	TTGACATGCTGGCTCCCGC	SLC35E4_c.190T>C_p.S64P
SLC35E4_22:30636640_T>C_2	TGACATGCTGGCTCCCGCC	SLC35E4_c.190T>C_p.S64P
SLC35A3_1:100017772_A>G_6	TTATCAACATTGATCTCCT	SLC35A3_c.970A>G_p.T324A
SLC35A3_1:100017772_A>G_5	TATCAACATTGATCTCCTA	SLC35A3_c.970A>G_p.T324A
SLC35A3_1:100017772_A>G_4	ATCAACATTGATCTCCTAT	SLC35A3_c.970A>G_p.T324A
SLC35A3_1:100017772_A>G_3	TCAACATTGATCTCCTATT	SLC35A3_c.970A>G_p.T324A
SLC35A3_1:100017772_A>G_2	CAACATTGATCTCCTATTT	SLC35A3_c.970A>G_p.T324A
SLC30A8_8:117146968_A>G_6	TCCAACAGAAACCGGTGAA	SLC30A8_c.86A>G_p.Q29R
SLC30A8_8:117146968_A>G_5	CCAACAGAAACCGGTGAAT	SLC30A8_c.86A>G_p.Q29R
SLC30A8_8:117146968_A>G_4	CAACAGAAACCGGTGAATA	SLC30A8_c.86A>G_p.Q29R
SLC30A8_8:117146968_A>G_3	AACAGAAACCGGTGAATAA	SLC30A8_c.86A>G_p.Q29R
SLC30A8_8:117146968_A>G_2	ACAGAAACCGGTGAATAAA	SLC30A8_c.86A>G_p.Q29R
SLC26A5_7:103413020_T>C_6	GTCTGGAGGTTCCAAGAAA	SLC26A5_c.385T>C_p.S129P
SLC26A5_7:103413020_T>C_5	TCTGGAGGTTCCAAGAAAA	SLC26A5_c.385T>C_p.S129P
SLC26A5_7:103413020_T>C_4	CTGGAGGTTCCAAGAAAAC	SLC26A5_c.385T>C_p.S129P
SLC26A5_7:103413020_T>C_3	TGGAGGTTCCAAGAAAACA	SLC26A5_c.385T>C_p.S129P
SLC26A5_7:103413020_T>C_2	GGAGGTTCCAAGAAAACAA	SLC26A5_c.385T>C_p.S129P
SLC25A40_7:87836344_A>G_6	CGCTTAATTAAAATTGCTC	SLC25A40_c.922A>G_p.I308V
SLC25A40_7:87836344_A>G_5	GCTTAATTAAAATTGCTCC	SLC25A40_c.922A>G_p.I308V
SLC25A40_7:87836344_A>G_4	CTTAATTAAAATTGCTCCT	SLC25A40_c.922A>G_p.I308V
SLC25A40_7:87836344_A>G_3	TTAATTAAAATTGCTCCTG	SLC25A40_c.922A>G_p.I308V
SLC25A40_7:87836344_A>G_2	TAATTAAAATTGCTCCTGC	SLC25A40_c.922A>G_p.I308V
SLC1A2_11:35265555_A>G_6	CTGCACACAACTCTGTCAT	SLC1A2_c.1625A>G_p.H542R
SLC1A2_11:35265555_A>G_5	TGCACACAACTCTGTCATA	SLC1A2_c.1625A>G_p.H542R
SLC1A2_11:35265555_A>G_4	GCACACAACTCTGTCATAG	SLC1A2_c.1625A>G_p.H542R
SLC1A2_11:35265555_A>G_3	CACACAACTCTGTCATAGT	SLC1A2_c.1625A>G_p.H542R
SLC1A2_11:35265555_A>G_2	ACACAACTCTGTCATAGTA	SLC1A2_c.1625A>G_p.H542R
SIRT6_19:4179182_A>G_6	TGGTGCAGCTGGAGCGCGT	SIRT6_c.299A>G_p.Q100R
SIRT6_19:4179182_A>G_5	GGTGCAGCTGGAGCGCGTG	SIRT6_c.299A>G_p.Q100R
SIRT6_19:4179182_A>G_4	GTGCAGCTGGAGCGCGTGG	SIRT6_c.299A>G_p.Q100R
SIRT6_19:4179182_A>G_3	TGCAGCTGGAGCGCGTGGG	SIRT6_c.299A>G_p.Q100R
SIRT6_19:4179182_A>G_2	GCAGCTGGAGCGCGTGGGC	SIRT6_c.299A>G_p.Q100R
SIPA1L3_19:38082466_A>G_6	TCGTCCATCTTTCGGAAGC	SIPA1L3_c.901A>G_p.I301V
SIPA1L3_19:38082466_A>G_5	CGTCCATCTTTCGGAAGCT	SIPA1L3_c.901A>G_p.I301V
SIPA1L3_19:38082466_A>G_4	GTCCATCTTTCGGAAGCTA	SIPA1L3_c.901A>G_p.I301V
SIPA1L3_19:38082466_A>G_3	TCCATCTTTCGGAAGCTAA	SIPA1L3_c.901A>G_p.I301V
SIPA1L3_19:38082466_A>G_2	CCATCTTTCGGAAGCTAAG	SIPA1L3_c.901A>G_p.I301V
SIGLEC11_19:49959787_A>G_6	TTTCACATGACAACACGTC	SIGLEC11_c.779A>G_p.H260R
SIGLEC11_19:49959787_A>G_5	TTCACATGACAACACGTCA	SIGLEC11_c.779A>G_p.H260R
SIGLEC11_19:49959787_A>G_4	TCACATGACAACACGTCAG	SIGLEC11_c.779A>G_p.H260R
SIGLEC11_19:49959787_A>G_3	CACATGACAACACGTCAGG	SIGLEC11_c.779A>G_p.H260R
SIGLEC11_19:49959787_A>G_2	ACATGACAACACGTCAGGT	SIGLEC11_c.779A>G_p.H260R
SIGLEC10_19:51416048_A>G_6	CTGCAGAACAGAGTCCTCT	SIGLEC10_c.874A>G_p.N292D
SIGLEC10_19:51416048_A>G_5	TGCAGAACAGAGTCCTCTC	SIGLEC10_c.874A>G_p.N292D
SIGLEC10_19:51416048_A>G_4	GCAGAACAGAGTCCTCTCC	SIGLEC10_c.874A>G_p.N292D
SIGLEC10_19:51416048_A>G_3	CAGAACAGAGTCCTCTCCT	SIGLEC10_c.874A>G_p.N292D
SIGLEC10_19:51416048_A>G_2	AGAACAGAGTCCTCTCCTC	SIGLEC10_c.874A>G_p.N292D
SHANK2_11:70485795_A>G_6	AGTAGCAGCGACCACCACC	SHANK2_c.2734A>G_p.S912G
SHANK2_11:70485795_A>G_5	GTAGCAGCGACCACCACCT	SHANK2_c.2734A>G_p.S912G
SHANK2_11:70485795_A>G_4	TAGCAGCGACCACCACCTC	SHANK2_c.2734A>G_p.S912G
SHANK2_11:70485795_A>G_3	AGCAGCGACCACCACCTCG	SHANK2_c.2734A>G_p.S912G
SHANK2_11:70485795_A>G_2	GCAGCGACCACCACCTCGA	SHANK2_c.2734A>G_p.S912G
SHANK1_19:50686810_T>C_6	GCTCGTACTCTGTGGGCAA	SHANK1_c.2392T>C_p.Y798H
SHANK1_19:50686810_T>C_5	CTCGTACTCTGTGGGCAAA	SHANK1_c.2392T>C_p.Y798H
SHANK1_19:50686810_T>C_4	TCGTACTCTGTGGGCAAAG	SHANK1_c.2392T>C_p.Y798H
SHANK1_19:50686810_T>C_3	CGTACTCTGTGGGCAAAGA	SHANK1_c.2392T>C_p.Y798H
SHANK1_19:50686810_T>C_2	GTACTCTGTGGGCAAAGAA	SHANK1_c.2392T>C_p.Y798H
SH3BP2_4:2829879_A>G_6	ATGGCCACTGCCACCTCCA	SH3BP2_c.1144A>G_p.T382A
SH3BP2_4:2829879_A>G_5	TGGCCACTGCCACCTCCAG	SH3BP2_c.1144A>G_p.T382A
SH3BP2_4:2829879_A>G_4	GGCCACTGCCACCTCCAGA	SH3BP2_c.1144A>G_p.T382A
SH3BP2_4:2829879_A>G_3	GCCACTGCCACCTCCAGAA	SH3BP2_c.1144A>G_p.T382A
SH3BP2_4:2829879_A>G_2	CCACTGCCACCTCCAGAAA	SH3BP2_c.1144A>G_p.T382A
SGIP1_1:66694463_A>G_6	TTTATGACAAACTGCCCTC	SGIP1_c.998A>G_p.D333G
SGIP1_1:66694463_A>G_5	TTATGACAAACTGCCCTCG	SGIP1_c.998A>G_p.D333G
SGIP1_1:66694463_A>G_4	TATGACAAACTGCCCTCGT	SGIP1_c.998A>G_p.D333G
SGIP1_1:66694463_A>G_3	ATGACAAACTGCCCTCGTT	SGIP1_c.998A>G_p.D333G
SGIP1_1:66694463_A>G_2	TGACAAACTGCCCTCGTTT	SGIP1_c.998A>G_p.D333G
SF3B1_2:197402110_A>G_6	CAGCAGAAAGTTCGGACCA	SF3B1_c.2098A>G_p.K700E
SF3B1_2:197402110_A>G_5	AGCAGAAAGTTCGGACCAT	SF3B1_c.2098A>G_p.K700E
SF3B1_2:197402110_A>G_4	GCAGAAAGTTCGGACCATC	SF3B1_c.2098A>G_p.K700E
SF3B1_2:197402110_A>G_3	CAGAAAGTTCGGACCATCA	SF3B1_c.2098A>G_p.K700E
SF3B1_2:197402110_A>G_2	AGAAAGTTCGGACCATCAG	SF3B1_c.2098A>G_p.K700E
SERPINA9_14:94469341_A>G_6	TCTCCAACCCCTCCATTGC	SERPINA9_c.554A>G_p.N185S
SERPINA9_14:94469341_A>G_5	CTCCAACCCCTCCATTGCC	SERPINA9_c.554A>G_p.N185S
SERPINA9_14:94469341_A>G_4	TCCAACCCCTCCATTGCCC	SERPINA9_c.554A>G_p.N185S
SERPINA9_14:94469341_A>G_3	CCAACCCCTCCATTGCCCA	SERPINA9_c.554A>G_p.N185S
SERPINA9_14:94469341_A>G_2	CAACCCCTCCATTGCCCAG	SERPINA9_c.554A>G_p.N185S
SERGEF_11:17992966_T>C_6	GCAAGAACACACATTGCTT	SERGEF_c.650T>C_p.V217A
SERGEF_11:17992966_T>C_5	CAAGAACACACATTGCTTT	SERGEF_c.650T>C_p.V217A
SERGEF_11:17992966_T>C_4	AAGAACACACATTGCTTTA	SERGEF_c.650T>C_p.V217A
SERGEF_11:17992966_T>C_3	AGAACACACATTGCTTTAG	SERGEF_c.650T>C_p.V217A
SERGEF_11:17992966_T>C_2	GAACACACATTGCTTTAGA	SERGEF_c.650T>C_p.V217A
SEC14L2_22:30406347_A>G_6	GCCAGAAGCTTCGACCTGC	SEC14L2_c.136A>G_p.S46G
SEC14L2_22:30406347_A>G_5	CCAGAAGCTTCGACCTGCA	SEC14L2_c.136A>G_p.S46G
SEC14L2_22:30406347_A>G_4	CAGAAGCTTCGACCTGCAG	SEC14L2_c.136A>G_p.S46G
SEC14L2_22:30406347_A>G_3	AGAAGCTTCGACCTGCAGA	SEC14L2_c.136A>G_p.S46G
SEC14L2_22:30406347_A>G_2	GAAGCTTCGACCTGCAGAA	SEC14L2_c.136A>G_p.S46G
SDK2_17:73419194_A>G_6	CACCAGAATGGAATTCTCA	SDK2_c.2158A>G_p.N720D
SDK2_17:73419194_A>G_5	ACCAGAATGGAATTCTCAA	SDK2_c.2158A>G_p.N720D
SDK2_17:73419194_A>G_4	CCAGAATGGAATTCTCAAG	SDK2_c.2158A>G_p.N720D
SDK2_17:73419194_A>G_3	CAGAATGGAATTCTCAAGG	SDK2_c.2158A>G_p.N720D
SDK2_17:73419194_A>G_2	AGAATGGAATTCTCAAGGG	SDK2_c.2158A>G_p.N720D
SDK1_7:4077036_T>C_6	GACGAGAGTCGTTCCTGCC	SDK1_c.3049T>C_p.S1017P
SDK1_7:4077036_T>C_5	ACGAGAGTCGTTCCTGCCG	SDK1_c.3049T>C_p.S1017P
SDK1_7:4077036_T>C_4	CGAGAGTCGTTCCTGCCGT	SDK1_c.3049T>C_p.S1017P
SDK1_7:4077036_T>C_3	GAGAGTCGTTCCTGCCGTA	SDK1_c.3049T>C_p.S1017P
SDK1_7:4077036_T>C_2	AGAGTCGTTCCTGCCGTAC	SDK1_c.3049T>C_p.S1017P
SDHD_11:112094849_T>C_6	TTCTGCAAGGCATCCCCAT	SDHD_c.359T>C_p.L120S
SDHD_11:112094849_T>C_5	TCTGCAAGGCATCCCCATG	SDHD_c.359T>C_p.L120S
SDHD_11:112094849_T>C_4	CTGCAAGGCATCCCCATGA	SDHD_c.359T>C_p.L120S
SDHD_11:112094849_T>C_3	TGCAAGGCATCCCCATGAA	SDHD_c.359T>C_p.L120S
SDHD_11:112094849_T>C_2	GCAAGGCATCCCCATGAAC	SDHD_c.359T>C_p.L120S
SDC4_20:45348351_T>C_6	CGAAGAACAGCAGCAGCGC	SDC4_c.34T>C_p.F12L
SDC4_20:45348351_T>C_5	GAAGAACAGCAGCAGCGCG	SDC4_c.34T>C_p.F12L
SDC4_20:45348351_T>C_4	AAGAACAGCAGCAGCGCGA	SDC4_c.34T>C_p.F12L
SDC4_20:45348351_T>C_3	AGAACAGCAGCAGCGCGAA	SDC4_c.34T>C_p.F12L
SDC4_20:45348351_T>C_2	GAACAGCAGCAGCGCGAAC	SDC4_c.34T>C_p.F12L
SCUBE2_11:9053709_A>G_6	TGTGTGAACACAGTGGGCA	SCUBE2_c.1258A>G_p.N420D
SCUBE2_11:9053709_A>G_5	GTGTGAACACAGTGGGCAG	SCUBE2_c.1258A>G_p.N420D
SCUBE2_11:9053709_A>G_4	TGTGAACACAGTGGGCAGC	SCUBE2_c.1258A>G_p.N420D
SCUBE2_11:9053709_A>G_3	GTGAACACAGTGGGCAGCT	SCUBE2_c.1258A>G_p.N420D
SCUBE2_11:9053709_A>G_2	TGAACACAGTGGGCAGCTA	SCUBE2_c.1258A>G_p.N420D
SCNN1D_1:1287738_A>G_6	GCCGGCATCAGGGTCATGG	SCNN1D_c.1465A>G_p.I489V
SCNN1D_1:1287738_A>G_5	CCGGCATCAGGGTCATGGT	SCNN1D_c.1465A>G_p.I489V
SCNN1D_1:1287738_A>G_4	CGGCATCAGGGTCATGGTT	SCNN1D_c.1465A>G_p.I489V
SCNN1D_1:1287738_A>G_3	GGCATCAGGGTCATGGTTC	SCNN1D_c.1465A>G_p.I489V
SCNN1D_1:1287738_A>G_2	GCATCAGGGTCATGGTTCA	SCNN1D_c.1465A>G_p.I489V
SCIN_7:12629177_A>G_6	ACTGCTACATCATACTCTA	SCIN_c.1274A>G_p.Y425C
SCIN_7:12629177_A>G_5	CTGCTACATCATACTCTAC	SCIN_c.1274A>G_p.Y425C
SCIN_7:12629177_A>G_4	TGCTACATCATACTCTACA	SCIN_c.1274A>G_p.Y425C
SCIN_7:12629177_A>G_3	GCTACATCATACTCTACAC	SCIN_c.1274A>G_p.Y425C
SCIN_7:12629177_A>G_2	CTACATCATACTCTACACC	SCIN_c.1274A>G_p.Y425C
SAMSN1_21:14486016_T>C_6	TATAGCAACCAGAGTCCCT	SAMSN1_c.1222T>C_p.C408R
SAMSN1_21:14486016_T>C_5	ATAGCAACCAGAGTCCCTT	SAMSN1_c.1222T>C_p.C408R
SAMSN1_21:14486016_T>C_4	TAGCAACCAGAGTCCCTTG	SAMSN1_c.1222T>C_p.C408R
SAMSN1_21:14486016_T>C_3	AGCAACCAGAGTCCCTTGG	SAMSN1_c.1222T>C_p.C408R
SAMSN1_21:14486016_T>C_2	GCAACCAGAGTCCCTTGGG	SAMSN1_c.1222T>C_p.C408R
RYR3_15:33819770_A>G_6	AAGACGACCCTTTGTACAC	RYR3_c.10721A>G_p.D3574G
RYR3_15:33819770_A>G_5	AGACGACCCTTTGTACACC	RYR3_c.10721A>G_p.D3574G
RYR3_15:33819770_A>G_4	GACGACCCTTTGTACACCT	RYR3_c.10721A>G_p.D3574G
RYR3_15:33819770_A>G_3	ACGACCCTTTGTACACCTC	RYR3_c.10721A>G_p.D3574G
RYR3_15:33819770_A>G_2	CGACCCTTTGTACACCTCC	RYR3_c.10721A>G_p.D3574G
RUBCN_3:197681227_A>G_6	TTCTCCAAGGACCTGCTCA	RUBCN_c.2332A>G_p.K778E
RUBCN_3:197681227_A>G_5	TCTCCAAGGACCTGCTCAT	RUBCN_c.2332A>G_p.K778E
RUBCN_3:197681227_A>G_4	CTCCAAGGACCTGCTCATT	RUBCN_c.2332A>G_p.K778E
RUBCN_3:197681227_A>G_3	TCCAAGGACCTGCTCATTA	RUBCN_c.2332A>G_p.K778E
RUBCN_3:197681227_A>G_2	CCAAGGACCTGCTCATTAA	RUBCN_c.2332A>G_p.K778E
RTTN_18:70059940_T>C_6	CTGCACATTGCTGAAAGAA	RTTN_c.4850T>C_p.M1617T
RTTN_18:70059940_T>C_5	TGCACATTGCTGAAAGAAG	RTTN_c.4850T>C_p.M1617T
RTTN_18:70059940_T>C_4	GCACATTGCTGAAAGAAGA	RTTN_c.4850T>C_p.M1617T
RTTN_18:70059940_T>C_3	CACATTGCTGAAAGAAGAG	RTTN_c.4850T>C_p.M1617T
RTTN_18:70059940_T>C_2	ACATTGCTGAAAGAAGAGA	RTTN_c.4850T>C_p.M1617T
RSPH10B_7:5958010_T>C_6	TCGTATATATTTCCAGATT	RSPH10B_c.677T>C_p.I226T
RSPH10B_7:5958010_T>C_5	CGTATATATTTCCAGATTT	RSPH10B_c.677T>C_p.I226T
RSPH10B_7:5958010_T>C_4	GTATATATTTCCAGATTTA	RSPH10B_c.677T>C_p.I226T
RSPH10B_7:5958010_T>C_3	TATATATTTCCAGATTTAT	RSPH10B_c.677T>C_p.I226T
RSPH10B_7:5958010_T>C_2	ATATATTTCCAGATTTATA	RSPH10B_c.677T>C_p.I226T
RPTOR_17:80925458_A>G_6	CCCGCTATTTTGCCCAGCC	RPTOR_c.2897A>G_p.Y966C
RPTOR_17:80925458_A>G_5	CCGCTATTTTGCCCAGCCC	RPTOR_c.2897A>G_p.Y966C
RPTOR_17:80925458_A>G_4	CGCTATTTTGCCCAGCCCG	RPTOR_c.2897A>G_p.Y966C
RPTOR_17:80925458_A>G_3	GCTATTTTGCCCAGCCCGT	RPTOR_c.2897A>G_p.Y966C
RPTOR_17:80925458_A>G_2	CTATTTTGCCCAGCCCGTC	RPTOR_c.2897A>G_p.Y966C
ROS1_6:117310183_A>G_6	TCTATAAAAATGATTACTA	ROS1_c.6332A>G_p.K2111R
ROS1_6:117310183_A>G_5	CTATAAAAATGATTACTAT	ROS1_c.6332A>G_p.K2111R
ROS1_6:117310183_A>G_4	TATAAAAATGATTACTATA	ROS1_c.6332A>G_p.K2111R
ROS1_6:117310183_A>G_3	ATAAAAATGATTACTATAG	ROS1_c.6332A>G_p.K2111R
ROS1_6:117310183_A>G_2	TAAAAATGATTACTATAGA	ROS1_c.6332A>G_p.K2111R
RNF213_17:80383800_A>G_6	CCCCGGAAAAGTGTGGTCC	RNF213_c.14194A>G_p.K4732E
RNF213_17:80383800_A>G_5	CCCGGAAAAGTGTGGTCCA	RNF213_c.14194A>G_p.K4732E
RNF213_17:80383800_A>G_4	CCGGAAAAGTGTGGTCCAT	RNF213_c.14194A>G_p.K4732E
RNF213_17:80383800_A>G_3	CGGAAAAGTGTGGTCCATT	RNF213_c.14194A>G_p.K4732E
RNF213_17:80383800_A>G_2	GGAAAAGTGTGGTCCATTG	RNF213_c.14194A>G_p.K4732E
RNF17_13:24793315_A>G_6	TGTGATAATTGAAGAAATT	RNF17_c.1209A>G_p.I403M
RNF17_13:24793315_A>G_5	GTGATAATTGAAGAAATTA	RNF17_c.1209A>G_p.I403M
RNF17_13:24793315_A>G_4	TGATAATTGAAGAAATTAT	RNF17_c.1209A>G_p.I403M
RNF17_13:24793315_A>G_3	GATAATTGAAGAAATTATT	RNF17_c.1209A>G_p.I403M
RNF17_13:24793315_A>G_2	ATAATTGAAGAAATTATTG	RNF17_c.1209A>G_p.I403M
RNF150_4:140967819_T>C_6	AGGCTTACTATCTCCTTCC	RNF150_c.539T>C_p.V180A
RNF150_4:140967819_T>C_5	GGCTTACTATCTCCTTCCC	RNF150_c.539T>C_p.V180A
RNF150_4:140967819_T>C_4	GCTTACTATCTCCTTCCCT	RNF150_c.539T>C_p.V180A
RNF150_4:140967819_T>C_3	CTTACTATCTCCTTCCCTT	RNF150_c.539T>C_p.V180A
RNF150_4:140967819_T>C_2	TTACTATCTCCTTCCCTTT	RNF150_c.539T>C_p.V180A
RNF148_7:122701954_A>G_6	CATACAAACCCCAAGATGT	RNF148_c.797A>G_p.K266R
RNF148_7:122701954_A>G_5	ATACAAACCCCAAGATGTA	RNF148_c.797A>G_p.K266R
RNF148_7:122701954_A>G_4	TACAAACCCCAAGATGTAG	RNF148_c.797A>G_p.K266R
RNF148_7:122701954_A>G_3	ACAAACCCCAAGATGTAGT	RNF148_c.797A>G_p.K266R
RNF148_7:122701954_A>G_2	CAAACCCCAAGATGTAGTA	RNF148_c.797A>G_p.K266R
RLIM_X:74591904_T>C_6	AACTTGAACTGGAACTGGA	RLIM_c.1411T>C_p.S471P
RLIM_X:74591904_T>C_5	ACTTGAACTGGAACTGGAA	RLIM_c.1411T>C_p.S471P
RLIM_X:74591904_T>C_4	CTTGAACTGGAACTGGAAC	RLIM_c.1411T>C_p.S471P
RLIM_X:74591904_T>C_3	TTGAACTGGAACTGGAACT	RLIM_c.1411T>C_p.S471P
RLIM_X:74591904_T>C_2	TGAACTGGAACTGGAACTC	RLIM_c.1411T>C_p.S471P
RIOX2_3:97967460_T>C_6	GAGATTAAACTTTCAAAGA	RIOX2_c.134T>C_p.L45S
RIOX2_3:97967460_T>C_5	AGATTAAACTTTCAAAGAG	RIOX2_c.134T>C_p.L45S
RIOX2_3:97967460_T>C_4	GATTAAACTTTCAAAGAGA	RIOX2_c.134T>C_p.L45S
RIOX2_3:97967460_T>C_3	ATTAAACTTTCAAAGAGAC	RIOX2_c.134T>C_p.L45S
RIOX2_3:97967460_T>C_2	TTAAACTTTCAAAGAGACT	RIOX2_c.134T>C_p.L45S
RINT1_7:105550110_T>C_6	TCATCCAGAAATTCAGTAT	RINT1_c.1052T>C_p.L351P
RINT1_7:105550110_T>C_5	CATCCAGAAATTCAGTATG	RINT1_c.1052T>C_p.L351P
RINT1_7:105550110_T>C_4	ATCCAGAAATTCAGTATGG	RINT1_c.1052T>C_p.L351P
RINT1_7:105550110_T>C_3	TCCAGAAATTCAGTATGGT	RINT1_c.1052T>C_p.L351P
RINT1_7:105550110_T>C_2	CCAGAAATTCAGTATGGTT	RINT1_c.1052T>C_p.L351P
RIMS2_8:103885512_A>G_6	CATTCCAAAGAATATATTG	RIMS2_c.913A>G_p.K305E
RIMS2_8:103885512_A>G_5	ATTCCAAAGAATATATTGT	RIMS2_c.913A>G_p.K305E
RIMS2_8:103885512_A>G_4	TTCCAAAGAATATATTGTA	RIMS2_c.913A>G_p.K305E
RIMS2_8:103885512_A>G_3	TCCAAAGAATATATTGTAG	RIMS2_c.913A>G_p.K305E
RIMS2_8:103885512_A>G_2	CCAAAGAATATATTGTAGA	RIMS2_c.913A>G_p.K305E
RGS8_1:182646916_T>C_6	ATGTTTACCTAGAGATACA	RGS8_c.416T>C_p.V139A
RGS8_1:182646916_T>C_5	TGTTTACCTAGAGATACAA	RGS8_c.416T>C_p.V139A
RGS8_1:182646916_T>C_4	GTTTACCTAGAGATACAAA	RGS8_c.416T>C_p.V139A
RGS8_1:182646916_T>C_3	TTTACCTAGAGATACAAAC	RGS8_c.416T>C_p.V139A
RGS8_1:182646916_T>C_2	TTACCTAGAGATACAAACA	RGS8_c.416T>C_p.V139A
RGS20_8:53954242_A>G_6	GCTAATAAAAACATTATTG	RGS20_c.910A>G_p.K304E
RGS20_8:53954242_A>G_5	CTAATAAAAACATTATTGA	RGS20_c.910A>G_p.K304E
RGS20_8:53954242_A>G_4	TAATAAAAACATTATTGAA	RGS20_c.910A>G_p.K304E
RGS20_8:53954242_A>G_3	AATAAAAACATTATTGAAG	RGS20_c.910A>G_p.K304E
RGS20_8:53954242_A>G_2	ATAAAAACATTATTGAAGA	RGS20_c.910A>G_p.K304E
REPS1_6:138912919_A>G_6	CAGTGGATGCCGATGGCCT	REPS1_c.1736A>G_p.D579G
REPS1_6:138912919_A>G_5	AGTGGATGCCGATGGCCTC	REPS1_c.1736A>G_p.D579G
REPS1_6:138912919_A>G_4	GTGGATGCCGATGGCCTCA	REPS1_c.1736A>G_p.D579G
REPS1_6:138912919_A>G_3	TGGATGCCGATGGCCTCAT	REPS1_c.1736A>G_p.D579G
REPS1_6:138912919_A>G_2	GGATGCCGATGGCCTCATA	REPS1_c.1736A>G_p.D579G
RDH8_19:10021323_T>C_6	TCAGCCATAGAAACCTGCG	RDH8_c.665T>C_p.M222T
RDH8_19:10021323_T>C_5	CAGCCATAGAAACCTGCGC	RDH8_c.665T>C_p.M222T
RDH8_19:10021323_T>C_4	AGCCATAGAAACCTGCGCC	RDH8_c.665T>C_p.M222T
RDH8_19:10021323_T>C_3	GCCATAGAAACCTGCGCCA	RDH8_c.665T>C_p.M222T
RDH8_19:10021323_T>C_2	CCATAGAAACCTGCGCCAG	RDH8_c.665T>C_p.M222T
RDH13_19:55045304_A>G_6	GGGCCCATCTTCTGGCTGC	RDH13_c.766A>G_p.I256V
RDH13_19:55045304_A>G_5	GGCCCATCTTCTGGCTGCT	RDH13_c.766A>G_p.I256V
RDH13_19:55045304_A>G_4	GCCCATCTTCTGGCTGCTG	RDH13_c.766A>G_p.I256V
RDH13_19:55045304_A>G_3	CCCATCTTCTGGCTGCTGG	RDH13_c.766A>G_p.I256V
RDH13_19:55045304_A>G_2	CCATCTTCTGGCTGCTGGT	RDH13_c.766A>G_p.I256V
RBMX2_X:130412384_A>G_6	AAAAAAAAGAAAGAAAAAG	RBMX2_c.505A>G_p.K169E
RBMX2_X:130412384_A>G_5	AAAAAAAGAAAGAAAAAGA	RBMX2_c.505A>G_p.K169E
RBMX2_X:130412384_A>G_4	AAAAAAGAAAGAAAAAGAG	RBMX2_c.505A>G_p.K169E
RBMX2_X:130412384_A>G_3	AAAAAGAAAGAAAAAGAGA	RBMX2_c.505A>G_p.K169E
RBMX2_X:130412384_A>G_2	AAAAGAAAGAAAAAGAGAA	RBMX2_c.505A>G_p.K169E
RAVER2_1:64777766_A>G_6	TCTTTTACATCAGAAGAGT	RAVER2_c.460A>G_p.T154A
RAVER2_1:64777766_A>G_5	CTTTTACATCAGAAGAGTT	RAVER2_c.460A>G_p.T154A
RAVER2_1:64777766_A>G_4	TTTTACATCAGAAGAGTTT	RAVER2_c.460A>G_p.T154A
RAVER2_1:64777766_A>G_3	TTTACATCAGAAGAGTTTG	RAVER2_c.460A>G_p.T154A
RAVER2_1:64777766_A>G_2	TTACATCAGAAGAGTTTGA	RAVER2_c.460A>G_p.T154A
RASGRP3_2:33527308_A>G_6	GTGAACATTGTGAAAATGC	RASGRP3_c.979A>G_p.I327V
RASGRP3_2:33527308_A>G_5	TGAACATTGTGAAAATGCA	RASGRP3_c.979A>G_p.I327V
RASGRP3_2:33527308_A>G_4	GAACATTGTGAAAATGCAC	RASGRP3_c.979A>G_p.I327V
RASGRP3_2:33527308_A>G_3	AACATTGTGAAAATGCACC	RASGRP3_c.979A>G_p.I327V
RASGRP3_2:33527308_A>G_2	ACATTGTGAAAATGCACCA	RASGRP3_c.979A>G_p.I327V
RASEF_9:82997016_T>C_6	ACCTCAATCATATCTACCC	RASEF_c.1916T>C_p.I639T
RASEF_9:82997016_T>C_5	CCTCAATCATATCTACCCA	RASEF_c.1916T>C_p.I639T
RASEF_9:82997016_T>C_4	CTCAATCATATCTACCCAT	RASEF_c.1916T>C_p.I639T
RASEF_9:82997016_T>C_3	TCAATCATATCTACCCATT	RASEF_c.1916T>C_p.I639T
RASEF_9:82997016_T>C_2	CAATCATATCTACCCATTC	RASEF_c.1916T>C_p.I639T
RALGAPB_20:38517509_T>C_6	CTAGAAATACCTTAAAAAA	RALGAPB_c.1055T>C_p.I352T
RALGAPB_20:38517509_T>C_5	TAGAAATACCTTAAAAAAA	RALGAPB_c.1055T>C_p.I352T
RALGAPB_20:38517509_T>C_4	AGAAATACCTTAAAAAAAA	RALGAPB_c.1055T>C_p.I352T
RALGAPB_20:38517509_T>C_3	GAAATACCTTAAAAAAAAA	RALGAPB_c.1055T>C_p.I352T
RALGAPB_20:38517509_T>C_2	AAATACCTTAAAAAAAAAA	RALGAPB_c.1055T>C_p.I352T
RAD21_8:116858403_A>G_6	GAGATAACCATGAGAGAAG	RAD21_c.430A>G_p.T144A
RAD21_8:116858403_A>G_5	AGATAACCATGAGAGAAGA	RAD21_c.430A>G_p.T144A
RAD21_8:116858403_A>G_4	GATAACCATGAGAGAAGAA	RAD21_c.430A>G_p.T144A
RAD21_8:116858403_A>G_3	ATAACCATGAGAGAAGAAG	RAD21_c.430A>G_p.T144A
RAD21_8:116858403_A>G_2	TAACCATGAGAGAAGAAGT	RAD21_c.430A>G_p.T144A
RAB11FIP3_16:426707_A>G_6	CGGTCTACGGGGCAGAGCA	RAB11FIP3_c.701A>G_p.Y234C
RAB11FIP3_16:426707_A>G_5	GGTCTACGGGGCAGAGCAG	RAB11FIP3_c.701A>G_p.Y234C
RAB11FIP3_16:426707_A>G_4	GTCTACGGGGCAGAGCAGG	RAB11FIP3_c.701A>G_p.Y234C
RAB11FIP3_16:426707_A>G_3	TCTACGGGGCAGAGCAGGT	RAB11FIP3_c.701A>G_p.Y234C
RAB11FIP3_16:426707_A>G_2	CTACGGGGCAGAGCAGGTA	RAB11FIP3_c.701A>G_p.Y234C
PYGO1_15:55546331_A>G_6	GCCTGCACCACAGAAAAAA	PYGO1_c.952A>G_p.T318A
PYGO1_15:55546331_A>G_5	CCTGCACCACAGAAAAAAG	PYGO1_c.952A>G_p.T318A
PYGO1_15:55546331_A>G_4	CTGCACCACAGAAAAAAGC	PYGO1_c.952A>G_p.T318A
PYGO1_15:55546331_A>G_3	TGCACCACAGAAAAAAGCA	PYGO1_c.952A>G_p.T318A
PYGO1_15:55546331_A>G_2	GCACCACAGAAAAAAGCAA	PYGO1_c.952A>G_p.T318A
PTPRT_20:42677985_A>G_6	CCAACTATAAGCTGTGGCA	PTPRT_c.1034A>G_p.Y345C
PTPRT_20:42677985_A>G_5	CAACTATAAGCTGTGGCAT	PTPRT_c.1034A>G_p.Y345C
PTPRT_20:42677985_A>G_4	AACTATAAGCTGTGGCATC	PTPRT_c.1034A>G_p.Y345C
PTPRT_20:42677985_A>G_3	ACTATAAGCTGTGGCATCT	PTPRT_c.1034A>G_p.Y345C
PTPRT_20:42677985_A>G_2	CTATAAGCTGTGGCATCTG	PTPRT_c.1034A>G_p.Y345C
PTPRM_18:8253253_A>G_6	AGCGATACCAGCAGCCTGG	PTPRM_c.2593A>G_p.T865A
PTPRM_18:8253253_A>G_5	GCGATACCAGCAGCCTGGT	PTPRM_c.2593A>G_p.T865A
PTPRM_18:8253253_A>G_4	CGATACCAGCAGCCTGGTG	PTPRM_c.2593A>G_p.T865A
PTPRM_18:8253253_A>G_3	GATACCAGCAGCCTGGTGC	PTPRM_c.2593A>G_p.T865A
PTPRM_18:8253253_A>G_2	ATACCAGCAGCCTGGTGCA	PTPRM_c.2593A>G_p.T865A
PTPN9_15:75517329_A>G_6	TTATCTATGACATGTGTGG	PTPN9_c.458A>G_p.Y153C
PTPN9_15:75517329_A>G_5	TATCTATGACATGTGTGGT	PTPN9_c.458A>G_p.Y153C
PTPN9_15:75517329_A>G_4	ATCTATGACATGTGTGGTT	PTPN9_c.458A>G_p.Y153C
PTPN9_15:75517329_A>G_3	TCTATGACATGTGTGGTTC	PTPN9_c.458A>G_p.Y153C
PTPN9_15:75517329_A>G_2	CTATGACATGTGTGGTTCT	PTPN9_c.458A>G_p.Y153C
PSPC1_13:19703273_A>G_6	GCACCAATGAGTGGTGTAG	PSPC1_c.1474A>G_p.M492V
PSPC1_13:19703273_A>G_5	CACCAATGAGTGGTGTAGG	PSPC1_c.1474A>G_p.M492V
PSPC1_13:19703273_A>G_4	ACCAATGAGTGGTGTAGGT	PSPC1_c.1474A>G_p.M492V
PSPC1_13:19703273_A>G_3	CCAATGAGTGGTGTAGGTC	PSPC1_c.1474A>G_p.M492V
PSPC1_13:19703273_A>G_2	CAATGAGTGGTGTAGGTCC	PSPC1_c.1474A>G_p.M492V
PSMB6_17:4798325_T>C_6	AGGCGGATCACTCCTCCAC	PSMB6_c.623T>C_p.I208T
PSMB6_17:4798325_T>C_5	GGCGGATCACTCCTCCACT	PSMB6_c.623T>C_p.I208T
PSMB6_17:4798325_T>C_4	GCGGATCACTCCTCCACTG	PSMB6_c.623T>C_p.I208T
PSMB6_17:4798325_T>C_3	CGGATCACTCCTCCACTGG	PSMB6_c.623T>C_p.I208T
PSMB6_17:4798325_T>C_2	GGATCACTCCTCCACTGGA	PSMB6_c.623T>C_p.I208T
PSG1_19:42871847_A>G_6	CAAAGTATACTGCAGGACC	PSG1_c.629A>G_p.Y210C
PSG1_19:42871847_A>G_5	AAAGTATACTGCAGGACCC	PSG1_c.629A>G_p.Y210C
PSG1_19:42871847_A>G_4	AAGTATACTGCAGGACCCT	PSG1_c.629A>G_p.Y210C
PSG1_19:42871847_A>G_3	AGTATACTGCAGGACCCTA	PSG1_c.629A>G_p.Y210C
PSG1_19:42871847_A>G_2	GTATACTGCAGGACCCTAT	PSG1_c.629A>G_p.Y210C
PSD2_5:139813560_A>G_6	AGGGGGACATGGGGGCAGC	PSD2_c.623A>G_p.D208G
PSD2_5:139813560_A>G_5	GGGGGACATGGGGGCAGCT	PSD2_c.623A>G_p.D208G
PSD2_5:139813560_A>G_4	GGGGACATGGGGGCAGCTG	PSD2_c.623A>G_p.D208G
PSD2_5:139813560_A>G_3	GGGACATGGGGGCAGCTGG	PSD2_c.623A>G_p.D208G
PSD2_5:139813560_A>G_2	GGACATGGGGGCAGCTGGT	PSD2_c.623A>G_p.D208G
PRSS3_9:33798545_A>G_6	GAGTGTAAAGCCTCCTACC	PRSS3_c.685A>G_p.K229E
PRSS3_9:33798545_A>G_5	AGTGTAAAGCCTCCTACCC	PRSS3_c.685A>G_p.K229E
PRSS3_9:33798545_A>G_4	GTGTAAAGCCTCCTACCCT	PRSS3_c.685A>G_p.K229E
PRSS3_9:33798545_A>G_3	TGTAAAGCCTCCTACCCTG	PRSS3_c.685A>G_p.K229E
PRSS3_9:33798545_A>G_2	GTAAAGCCTCCTACCCTGG	PRSS3_c.685A>G_p.K229E
PROX1_1:214011573_A>G_6	TCCGTGAGTTTTACTACAT	PROX1_c.1886A>G_p.E629G
PROX1_1:214011573_A>G_5	CCGTGAGTTTTACTACATT	PROX1_c.1886A>G_p.E629G
PROX1_1:214011573_A>G_4	CGTGAGTTTTACTACATTC	PROX1_c.1886A>G_p.E629G
PROX1_1:214011573_A>G_3	GTGAGTTTTACTACATTCA	PROX1_c.1886A>G_p.E629G
PROX1_1:214011573_A>G_2	TGAGTTTTACTACATTCAG	PROX1_c.1886A>G_p.E629G
PRICKLE2_3:64157352_T>C_6	CCATTGATCTGGCCTCCGC	PRICKLE2_c.410T>C_p.I137T
PRICKLE2_3:64157352_T>C_5	CATTGATCTGGCCTCCGCA	PRICKLE2_c.410T>C_p.I137T
PRICKLE2_3:64157352_T>C_4	ATTGATCTGGCCTCCGCAC	PRICKLE2_c.410T>C_p.I137T
PRICKLE2_3:64157352_T>C_3	TTGATCTGGCCTCCGCACT	PRICKLE2_c.410T>C_p.I137T
PRICKLE2_3:64157352_T>C_2	TGATCTGGCCTCCGCACTG	PRICKLE2_c.410T>C_p.I137T
PRB2_12:11393924_T>C_6	GAGGAGATGGGGGACCTTG	PRB2_c.154T>C_p.S52P
PRB2_12:11393924_T>C_5	AGGAGATGGGGGACCTTGA	PRB2_c.154T>C_p.S52P
PRB2_12:11393924_T>C_4	GGAGATGGGGGACCTTGAG	PRB2_c.154T>C_p.S52P
PRB2_12:11393924_T>C_3	GAGATGGGGGACCTTGAGG	PRB2_c.154T>C_p.S52P
PRB2_12:11393924_T>C_2	AGATGGGGGACCTTGAGGT	PRB2_c.154T>C_p.S52P
PPP6R3_11:68591656_A>G_6	AGATATATGGGAGGAAAAG	PPP6R3_c.1866A>G_p.I622M
PPP6R3_11:68591656_A>G_5	GATATATGGGAGGAAAAGC	PPP6R3_c.1866A>G_p.I622M
PPP6R3_11:68591656_A>G_4	ATATATGGGAGGAAAAGCA	PPP6R3_c.1866A>G_p.I622M
PPP6R3_11:68591656_A>G_3	TATATGGGAGGAAAAGCAC	PPP6R3_c.1866A>G_p.I622M
PPP6R3_11:68591656_A>G_2	ATATGGGAGGAAAAGCACA	PPP6R3_c.1866A>G_p.I622M
PPP6C_9:125153694_A>G_6	CCTGATATCAAAACACTGG	PPP6C_c.619A>G_p.I207V
PPP6C_9:125153694_A>G_5	CTGATATCAAAACACTGGA	PPP6C_c.619A>G_p.I207V
PPP6C_9:125153694_A>G_4	TGATATCAAAACACTGGAT	PPP6C_c.619A>G_p.I207V
PPP6C_9:125153694_A>G_3	GATATCAAAACACTGGATC	PPP6C_c.619A>G_p.I207V
PPP6C_9:125153694_A>G_2	ATATCAAAACACTGGATCA	PPP6C_c.619A>G_p.I207V
PPP1R3A_7:113879984_T>C_6	TTTGGAACAAGTCAGTACA	PPP1R3A_c.1108T>C_p.F370L
PPP1R3A_7:113879984_T>C_5	TTGGAACAAGTCAGTACAT	PPP1R3A_c.1108T>C_p.F370L
PPP1R3A_7:113879984_T>C_4	TGGAACAAGTCAGTACATA	PPP1R3A_c.1108T>C_p.F370L
PPP1R3A_7:113879984_T>C_3	GGAACAAGTCAGTACATAT	PPP1R3A_c.1108T>C_p.F370L
PPP1R3A_7:113879984_T>C_2	GAACAAGTCAGTACATATT	PPP1R3A_c.1108T>C_p.F370L
PPM1E_17:58756130_T>C_6	GCTCGGACTCGGGTTCGGG	PPM1E_c.133T>C_p.S45P
PPM1E_17:58756130_T>C_5	CTCGGACTCGGGTTCGGGT	PPM1E_c.133T>C_p.S45P
PPM1E_17:58756130_T>C_4	TCGGACTCGGGTTCGGGTT	PPM1E_c.133T>C_p.S45P
PPM1E_17:58756130_T>C_3	CGGACTCGGGTTCGGGTTC	PPM1E_c.133T>C_p.S45P
PPM1E_17:58756130_T>C_2	GGACTCGGGTTCGGGTTCG	PPM1E_c.133T>C_p.S45P
PPM1B_2:44201300_T>C_6	ATTTCCACTCTCCATCCTT	PPM1B_c.101T>C_p.V34A
PPM1B_2:44201300_T>C_5	TTTCCACTCTCCATCCTTG	PPM1B_c.101T>C_p.V34A
PPM1B_2:44201300_T>C_4	TTCCACTCTCCATCCTTGC	PPM1B_c.101T>C_p.V34A
PPM1B_2:44201300_T>C_3	TCCACTCTCCATCCTTGCA	PPM1B_c.101T>C_p.V34A
PPM1B_2:44201300_T>C_2	CCACTCTCCATCCTTGCAT	PPM1B_c.101T>C_p.V34A
PPAN_19:10110001_A>G_6	CAGGACATCAGCGAGCTGC	PPAN_c.679A>G_p.I227V
PPAN_19:10110001_A>G_5	AGGACATCAGCGAGCTGCT	PPAN_c.679A>G_p.I227V
PPAN_19:10110001_A>G_4	GGACATCAGCGAGCTGCTG	PPAN_c.679A>G_p.I227V
PPAN_19:10110001_A>G_3	GACATCAGCGAGCTGCTGG	PPAN_c.679A>G_p.I227V
PPAN_19:10110001_A>G_2	ACATCAGCGAGCTGCTGGC	PPAN_c.679A>G_p.I227V
POLN_4:2170729_A>G_6	AGGAACAGTCTCCCCAGAA	POLN_c.1504A>G_p.S502G
POLN_4:2170729_A>G_5	GGAACAGTCTCCCCAGAAC	POLN_c.1504A>G_p.S502G
POLN_4:2170729_A>G_4	GAACAGTCTCCCCAGAACG	POLN_c.1504A>G_p.S502G
POLN_4:2170729_A>G_3	AACAGTCTCCCCAGAACGG	POLN_c.1504A>G_p.S502G
POLN_4:2170729_A>G_2	ACAGTCTCCCCAGAACGGG	POLN_c.1504A>G_p.S502G
PNISR_6:99400851_A>G_6	GATTTTAAGTTCAGTAGTC	PNISR_c.2107A>G_p.K703E
PNISR_6:99400851_A>G_5	ATTTTAAGTTCAGTAGTCA	PNISR_c.2107A>G_p.K703E
PNISR_6:99400851_A>G_4	TTTTAAGTTCAGTAGTCAG	PNISR_c.2107A>G_p.K703E
PNISR_6:99400851_A>G_3	TTTAAGTTCAGTAGTCAGG	PNISR_c.2107A>G_p.K703E
PNISR_6:99400851_A>G_2	TTAAGTTCAGTAGTCAGGA	PNISR_c.2107A>G_p.K703E
PLTP_20:45899654_T>C_6	TGCAGCATGGTCTTCAGAG	PLTP_c.1250T>C_p.M417T
PLTP_20:45899654_T>C_5	GCAGCATGGTCTTCAGAGG	PLTP_c.1250T>C_p.M417T
PLTP_20:45899654_T>C_4	CAGCATGGTCTTCAGAGGG	PLTP_c.1250T>C_p.M417T
PLTP_20:45899654_T>C_3	AGCATGGTCTTCAGAGGGG	PLTP_c.1250T>C_p.M417T
PLTP_20:45899654_T>C_2	GCATGGTCTTCAGAGGGGC	PLTP_c.1250T>C_p.M417T
PLOD1_1:11970709_A>G_6	CCGACTATTGACATCCACA	PLOD1_c.1795A>G_p.I599V
PLOD1_1:11970709_A>G_5	CGACTATTGACATCCACAT	PLOD1_c.1795A>G_p.I599V
PLOD1_1:11970709_A>G_4	GACTATTGACATCCACATG	PLOD1_c.1795A>G_p.I599V
PLOD1_1:11970709_A>G_3	ACTATTGACATCCACATGA	PLOD1_c.1795A>G_p.I599V
PLOD1_1:11970709_A>G_2	CTATTGACATCCACATGAA	PLOD1_c.1795A>G_p.I599V
PLCL1_2:198085250_A>G_6	AGAAGCAAATCCGACTCTG	PLCL1_c.1733A>G_p.Q578R
PLCL1_2:198085250_A>G_5	GAAGCAAATCCGACTCTGT	PLCL1_c.1733A>G_p.Q578R
PLCL1_2:198085250_A>G_4	AAGCAAATCCGACTCTGTA	PLCL1_c.1733A>G_p.Q578R
PLCL1_2:198085250_A>G_3	AGCAAATCCGACTCTGTAG	PLCL1_c.1733A>G_p.Q578R
PLCL1_2:198085250_A>G_2	GCAAATCCGACTCTGTAGG	PLCL1_c.1733A>G_p.Q578R
PLBD1_12:14511337_A>G_6	GTCTTGACAAAGGCACTCT	PLBD1_c.1109A>G_p.D370G
PLBD1_12:14511337_A>G_5	TCTTGACAAAGGCACTCTG	PLBD1_c.1109A>G_p.D370G
PLBD1_12:14511337_A>G_4	CTTGACAAAGGCACTCTGT	PLBD1_c.1109A>G_p.D370G
PLBD1_12:14511337_A>G_3	TTGACAAAGGCACTCTGTA	PLBD1_c.1109A>G_p.D370G
PLBD1_12:14511337_A>G_2	TGACAAAGGCACTCTGTAC	PLBD1_c.1109A>G_p.D370G
PLA2G15_16:68245512_A>G_6	TCGCGGACCCAGCGCTCCC	PLA2G15_c.86A>G_p.D29G
PLA2G15_16:68245512_A>G_5	CGCGGACCCAGCGCTCCCG	PLA2G15_c.86A>G_p.D29G
PLA2G15_16:68245512_A>G_4	GCGGACCCAGCGCTCCCGG	PLA2G15_c.86A>G_p.D29G
PLA2G15_16:68245512_A>G_3	CGGACCCAGCGCTCCCGGC	PLA2G15_c.86A>G_p.D29G
PLA2G15_16:68245512_A>G_2	GGACCCAGCGCTCCCGGCC	PLA2G15_c.86A>G_p.D29G
PILRB_7:100358821_A>G_6	GTTCCCAACGTGAGAATAT	PILRB_c.196A>G_p.N66D
PILRB_7:100358821_A>G_5	TTCCCAACGTGAGAATATC	PILRB_c.196A>G_p.N66D
PILRB_7:100358821_A>G_4	TCCCAACGTGAGAATATCC	PILRB_c.196A>G_p.N66D
PILRB_7:100358821_A>G_3	CCCAACGTGAGAATATCCT	PILRB_c.196A>G_p.N66D
PILRB_7:100358821_A>G_2	CCAACGTGAGAATATCCTG	PILRB_c.196A>G_p.N66D
PIK3CA_3:179234297_A>G_6	ATGCACATCATGGTGGCTG	PIK3CA_c.3140A>G_p.H1047R
PIK3CA_3:179234297_A>G_5	TGCACATCATGGTGGCTGG	PIK3CA_c.3140A>G_p.H1047R
PIK3CA_3:179234297_A>G_4	GCACATCATGGTGGCTGGA	PIK3CA_c.3140A>G_p.H1047R
PIK3CA_3:179234297_A>G_3	CACATCATGGTGGCTGGAC	PIK3CA_c.3140A>G_p.H1047R
PIK3CA_3:179234297_A>G_2	ACATCATGGTGGCTGGACA	PIK3CA_c.3140A>G_p.H1047R
PIK3CA_3:179234264_T>C_6	TACTCCAAAGCCTCTTGCT	PIK3CA_c.3107T>C_p.L1036S
PIK3CA_3:179234264_T>C_5	ACTCCAAAGCCTCTTGCTC	PIK3CA_c.3107T>C_p.L1036S
PIK3CA_3:179234264_T>C_4	CTCCAAAGCCTCTTGCTCA	PIK3CA_c.3107T>C_p.L1036S
PIK3CA_3:179234264_T>C_3	TCCAAAGCCTCTTGCTCAG	PIK3CA_c.3107T>C_p.L1036S
PIK3CA_3:179234264_T>C_2	CCAAAGCCTCTTGCTCAGT	PIK3CA_c.3107T>C_p.L1036S
PIK3CA_3:179218304_A>G_6	TCACTGAGCAGGAGAAAGA	PIK3CA_c.1634A>G_p.E545G
PIK3CA_3:179218304_A>G_5	CACTGAGCAGGAGAAAGAT	PIK3CA_c.1634A>G_p.E545G
PIK3CA_3:179218304_A>G_4	ACTGAGCAGGAGAAAGATT	PIK3CA_c.1634A>G_p.E545G
PIK3CA_3:179218304_A>G_3	CTGAGCAGGAGAAAGATTT	PIK3CA_c.1634A>G_p.E545G
PIK3CA_3:179218304_A>G_2	TGAGCAGGAGAAAGATTTT	PIK3CA_c.1634A>G_p.E545G
PIK3CA_3:179210192_T>C_6	ATGGACAGTGTTCCTTAAA	PIK3CA_c.1258T>C_p.C420R
PIK3CA_3:179210192_T>C_5	TGGACAGTGTTCCTTAAAA	PIK3CA_c.1258T>C_p.C420R
PIK3CA_3:179210192_T>C_4	GGACAGTGTTCCTTAAAAA	PIK3CA_c.1258T>C_p.C420R
PIK3CA_3:179210192_T>C_3	GACAGTGTTCCTTAAAAAA	PIK3CA_c.1258T>C_p.C420R
PIK3CA_3:179210192_T>C_2	ACAGTGTTCCTTAAAAAAC	PIK3CA_c.1258T>C_p.C420R
PIK3CA_3:179199156_A>G_6	GAAGAAAAGATCCTCAATC	PIK3CA_c.331A>G_p.K111E
PIK3CA_3:179199156_A>G_5	AAGAAAAGATCCTCAATCG	PIK3CA_c.331A>G_p.K111E
PIK3CA_3:179199156_A>G_4	AGAAAAGATCCTCAATCGA	PIK3CA_c.331A>G_p.K111E
PIK3CA_3:179199156_A>G_3	GAAAAGATCCTCAATCGAG	PIK3CA_c.331A>G_p.K111E
PIK3CA_3:179199156_A>G_2	AAAAGATCCTCAATCGAGA	PIK3CA_c.331A>G_p.K111E
PIK3C2G_12:18424009_A>G_6	CCTTGCAGAGCATCCAGGT	PIK3C2G_c.2474A>G_p.Q825R
PIK3C2G_12:18424009_A>G_5	CTTGCAGAGCATCCAGGTT	PIK3C2G_c.2474A>G_p.Q825R
PIK3C2G_12:18424009_A>G_4	TTGCAGAGCATCCAGGTTG	PIK3C2G_c.2474A>G_p.Q825R
PIK3C2G_12:18424009_A>G_3	TGCAGAGCATCCAGGTTGC	PIK3C2G_c.2474A>G_p.Q825R
PIK3C2G_12:18424009_A>G_2	GCAGAGCATCCAGGTTGCC	PIK3C2G_c.2474A>G_p.Q825R
PGM5_9:68378229_A>G_6	AATGGCATCTTGTCGACAC	PGM5_c.292A>G_p.I98V
PGM5_9:68378229_A>G_5	ATGGCATCTTGTCGACACC	PGM5_c.292A>G_p.I98V
PGM5_9:68378229_A>G_4	TGGCATCTTGTCGACACCT	PGM5_c.292A>G_p.I98V
PGM5_9:68378229_A>G_3	GGCATCTTGTCGACACCTG	PGM5_c.292A>G_p.I98V
PGM5_9:68378229_A>G_2	GCATCTTGTCGACACCTGC	PGM5_c.292A>G_p.I98V
PELO_5:52801563_A>G_6	CTTTCTATGGACTCAAGCA	PELO_c.881A>G_p.Y294C
PELO_5:52801563_A>G_5	TTTCTATGGACTCAAGCAG	PELO_c.881A>G_p.Y294C
PELO_5:52801563_A>G_4	TTCTATGGACTCAAGCAGG	PELO_c.881A>G_p.Y294C
PELO_5:52801563_A>G_3	TCTATGGACTCAAGCAGGT	PELO_c.881A>G_p.Y294C
PELO_5:52801563_A>G_2	CTATGGACTCAAGCAGGTG	PELO_c.881A>G_p.Y294C
PDS5A_4:39976531_T>C_6	CTCACGACGCCACAGAGGG	PDS5A_c.47T>C_p.V16A
PDS5A_4:39976531_T>C_5	TCACGACGCCACAGAGGGC	PDS5A_c.47T>C_p.V16A
PDS5A_4:39976531_T>C_4	CACGACGCCACAGAGGGCA	PDS5A_c.47T>C_p.V16A
PDS5A_4:39976531_T>C_3	ACGACGCCACAGAGGGCAG	PDS5A_c.47T>C_p.V16A
PDS5A_4:39976531_T>C_2	CGACGCCACAGAGGGCAGT	PDS5A_c.47T>C_p.V16A
PDPR_16:70144440_A>G_6	TCTCCAACCGACCAGCAGG	PDPR_c.1774A>G_p.T592A
PDPR_16:70144440_A>G_5	CTCCAACCGACCAGCAGGT	PDPR_c.1774A>G_p.T592A
PDPR_16:70144440_A>G_4	TCCAACCGACCAGCAGGTC	PDPR_c.1774A>G_p.T592A
PDPR_16:70144440_A>G_3	CCAACCGACCAGCAGGTCC	PDPR_c.1774A>G_p.T592A
PDPR_16:70144440_A>G_2	CAACCGACCAGCAGGTCCA	PDPR_c.1774A>G_p.T592A
PCF11_11:83168551_A>G_6	ATACAAATCAGCGACTTAC	PCF11_c.2216A>G_p.N739S
PCF11_11:83168551_A>G_5	TACAAATCAGCGACTTACA	PCF11_c.2216A>G_p.N739S
PCF11_11:83168551_A>G_4	ACAAATCAGCGACTTACAG	PCF11_c.2216A>G_p.N739S
PCF11_11:83168551_A>G_3	CAAATCAGCGACTTACAGC	PCF11_c.2216A>G_p.N739S
PCF11_11:83168551_A>G_2	AAATCAGCGACTTACAGCT	PCF11_c.2216A>G_p.N739S
PCDHGC3_5:141476274_A>G_6	TCGCGAACCTTGGTTTGGA	PCDHGC3_c.158A>G_p.N53S
PCDHGC3_5:141476274_A>G_5	CGCGAACCTTGGTTTGGAT	PCDHGC3_c.158A>G_p.N53S
PCDHGC3_5:141476274_A>G_4	GCGAACCTTGGTTTGGATC	PCDHGC3_c.158A>G_p.N53S
PCDHGC3_5:141476274_A>G_3	CGAACCTTGGTTTGGATCT	PCDHGC3_c.158A>G_p.N53S
PCDHGC3_5:141476274_A>G_2	GAACCTTGGTTTGGATCTC	PCDHGC3_c.158A>G_p.N53S
PCDHGB1_5:141352320_A>G_6	AGTTTTACCTGGTTGTGGC	PCDHGB1_c.2060A>G_p.Y687C
PCDHGB1_5:141352320_A>G_5	GTTTTACCTGGTTGTGGCC	PCDHGB1_c.2060A>G_p.Y687C
PCDHGB1_5:141352320_A>G_4	TTTTACCTGGTTGTGGCCT	PCDHGB1_c.2060A>G_p.Y687C
PCDHGB1_5:141352320_A>G_3	TTTACCTGGTTGTGGCCTT	PCDHGB1_c.2060A>G_p.Y687C
PCDHGB1_5:141352320_A>G_2	TTACCTGGTTGTGGCCTTG	PCDHGB1_c.2060A>G_p.Y687C
PCDHGA11_5:141421579_T>C_6	CTCCGTAAATCTTCAAGGT	PCDHGA11_c.352T>C_p.Y118H
PCDHGA11_5:141421579_T>C_5	TCCGTAAATCTTCAAGGTG	PCDHGA11_c.352T>C_p.Y118H
PCDHGA11_5:141421579_T>C_4	CCGTAAATCTTCAAGGTGT	PCDHGA11_c.352T>C_p.Y118H
PCDHGA11_5:141421579_T>C_3	CGTAAATCTTCAAGGTGTC	PCDHGA11_c.352T>C_p.Y118H
PCDHGA11_5:141421579_T>C_2	GTAAATCTTCAAGGTGTCT	PCDHGA11_c.352T>C_p.Y118H
PCDHGA1_5:141331916_A>G_6	CACTGGACAGAGAACTTAT	PCDHGA1_c.1232A>G_p.D411G
PCDHGA1_5:141331916_A>G_5	ACTGGACAGAGAACTTATC	PCDHGA1_c.1232A>G_p.D411G
PCDHGA1_5:141331916_A>G_4	CTGGACAGAGAACTTATCT	PCDHGA1_c.1232A>G_p.D411G
PCDHGA1_5:141331916_A>G_3	TGGACAGAGAACTTATCTC	PCDHGA1_c.1232A>G_p.D411G
PCDHGA1_5:141331916_A>G_2	GGACAGAGAACTTATCTCT	PCDHGA1_c.1232A>G_p.D411G
PCDH17_13:57634297_T>C_6	GGGAGCACGATCACTGGCG	PCDH17_c.1751T>C_p.V584A
PCDH17_13:57634297_T>C_5	GGAGCACGATCACTGGCGC	PCDH17_c.1751T>C_p.V584A
PCDH17_13:57634297_T>C_4	GAGCACGATCACTGGCGCG	PCDH17_c.1751T>C_p.V584A
PCDH17_13:57634297_T>C_3	AGCACGATCACTGGCGCGT	PCDH17_c.1751T>C_p.V584A
PCDH17_13:57634297_T>C_2	GCACGATCACTGGCGCGTT	PCDH17_c.1751T>C_p.V584A
PARP4_13:24447125_A>G_6	AATGGCAGCAACTCAATCC	PARP4_c.3176A>G_p.Q1059R
PARP4_13:24447125_A>G_5	ATGGCAGCAACTCAATCCA	PARP4_c.3176A>G_p.Q1059R
PARP4_13:24447125_A>G_4	TGGCAGCAACTCAATCCAG	PARP4_c.3176A>G_p.Q1059R
PARP4_13:24447125_A>G_3	GGCAGCAACTCAATCCAGA	PARP4_c.3176A>G_p.Q1059R
PARP4_13:24447125_A>G_2	GCAGCAACTCAATCCAGAT	PARP4_c.3176A>G_p.Q1059R
PALB2_16:23634870_A>G_6	TTATTCAAGTGAAAGGTAA	PALB2_c.1676A>G_p.Q559R
PALB2_16:23634870_A>G_5	TATTCAAGTGAAAGGTAAA	PALB2_c.1676A>G_p.Q559R
PALB2_16:23634870_A>G_4	ATTCAAGTGAAAGGTAAAT	PALB2_c.1676A>G_p.Q559R
PALB2_16:23634870_A>G_3	TTCAAGTGAAAGGTAAATC	PALB2_c.1676A>G_p.Q559R
PALB2_16:23634870_A>G_2	TCAAGTGAAAGGTAAATCA	PALB2_c.1676A>G_p.Q559R
PABPC5_X:91436371_A>G_6	CCATCGATGGAAAAGTCCT	PABPC5_c.794A>G_p.D265G
PABPC5_X:91436371_A>G_5	CATCGATGGAAAAGTCCTC	PABPC5_c.794A>G_p.D265G
PABPC5_X:91436371_A>G_4	ATCGATGGAAAAGTCCTCT	PABPC5_c.794A>G_p.D265G
PABPC5_X:91436371_A>G_3	TCGATGGAAAAGTCCTCTA	PABPC5_c.794A>G_p.D265G
PABPC5_X:91436371_A>G_2	CGATGGAAAAGTCCTCTAT	PABPC5_c.794A>G_p.D265G
PABPC4L_4:134200938_A>G_6	CTGTTCAGGAAGTTCAGCA	PABPC4L_c.82A>G_p.R28G
PABPC4L_4:134200938_A>G_5	TGTTCAGGAAGTTCAGCAC	PABPC4L_c.82A>G_p.R28G
PABPC4L_4:134200938_A>G_4	GTTCAGGAAGTTCAGCACT	PABPC4L_c.82A>G_p.R28G
PABPC4L_4:134200938_A>G_3	TTCAGGAAGTTCAGCACTG	PABPC4L_c.82A>G_p.R28G
PABPC4L_4:134200938_A>G_2	TCAGGAAGTTCAGCACTGT	PABPC4L_c.82A>G_p.R28G
PABPC3_13:25097541_T>C_6	GGGCGGATAGCACTGGGCT	PABPC3_c.1343T>C_p.I448T
PABPC3_13:25097541_T>C_5	GGCGGATAGCACTGGGCTT	PABPC3_c.1343T>C_p.I448T
PABPC3_13:25097541_T>C_4	GCGGATAGCACTGGGCTTA	PABPC3_c.1343T>C_p.I448T
PABPC3_13:25097541_T>C_3	CGGATAGCACTGGGCTTAT	PABPC3_c.1343T>C_p.I448T
PABPC3_13:25097541_T>C_2	GGATAGCACTGGGCTTATT	PABPC3_c.1343T>C_p.I448T
PABPC3_13:25097447_T>C_6	GAGGATAGTATGCAGCATG	PABPC3_c.1249T>C_p.Y417H
PABPC3_13:25097447_T>C_5	AGGATAGTATGCAGCATGG	PABPC3_c.1249T>C_p.Y417H
PABPC3_13:25097447_T>C_4	GGATAGTATGCAGCATGGT	PABPC3_c.1249T>C_p.Y417H
PABPC3_13:25097447_T>C_3	GATAGTATGCAGCATGGTT	PABPC3_c.1249T>C_p.Y417H
PABPC3_13:25097447_T>C_2	ATAGTATGCAGCATGGTTC	PABPC3_c.1249T>C_p.Y417H
PABPC3_13:25097327_T>C_6	TGAGGTAAGCCTGGCGCTC	PABPC3_c.1129T>C_p.Y377H
PABPC3_13:25097327_T>C_5	GAGGTAAGCCTGGCGCTCT	PABPC3_c.1129T>C_p.Y377H
PABPC3_13:25097327_T>C_4	AGGTAAGCCTGGCGCTCTT	PABPC3_c.1129T>C_p.Y377H
PABPC3_13:25097327_T>C_3	GGTAAGCCTGGCGCTCTTC	PABPC3_c.1129T>C_p.Y377H
PABPC3_13:25097327_T>C_2	GTAAGCCTGGCGCTCTTCT	PABPC3_c.1129T>C_p.Y377H
PABPC3_13:25097313_A>G_6	GCAAAGAAGAGCGCCAGGC	PABPC3_c.1115A>G_p.E372G
PABPC3_13:25097313_A>G_5	CAAAGAAGAGCGCCAGGCT	PABPC3_c.1115A>G_p.E372G
PABPC3_13:25097313_A>G_4	AAAGAAGAGCGCCAGGCTT	PABPC3_c.1115A>G_p.E372G
PABPC3_13:25097313_A>G_3	AAGAAGAGCGCCAGGCTTA	PABPC3_c.1115A>G_p.E372G
PABPC3_13:25097313_A>G_2	AGAAGAGCGCCAGGCTTAC	PABPC3_c.1115A>G_p.E372G
PABPC3_13:25096529_A>G_6	TCCATTAATAATAAAGCAC	PABPC3_c.331A>G_p.N111D
PABPC3_13:25096529_A>G_5	CCATTAATAATAAAGCACT	PABPC3_c.331A>G_p.N111D
PABPC3_13:25096529_A>G_4	CATTAATAATAAAGCACTG	PABPC3_c.331A>G_p.N111D
PABPC3_13:25096529_A>G_3	ATTAATAATAAAGCACTGT	PABPC3_c.331A>G_p.N111D
PABPC3_13:25096529_A>G_2	TTAATAATAAAGCACTGTA	PABPC3_c.331A>G_p.N111D
OXCT2_1:39769817_A>G_6	AGAAAGAGCTGACGCTGAG	OXCT2_c.1439A>G_p.E480G
OXCT2_1:39769817_A>G_5	GAAAGAGCTGACGCTGAGG	OXCT2_c.1439A>G_p.E480G
OXCT2_1:39769817_A>G_4	AAAGAGCTGACGCTGAGGG	OXCT2_c.1439A>G_p.E480G
OXCT2_1:39769817_A>G_3	AAGAGCTGACGCTGAGGGA	OXCT2_c.1439A>G_p.E480G
OXCT2_1:39769817_A>G_2	AGAGCTGACGCTGAGGGAG	OXCT2_c.1439A>G_p.E480G
OSBPL11_3:125567549_T>C_6	CATTCAATTCGTCTAATTA	OSBPL11_c.713T>C_p.I238T
OSBPL11_3:125567549_T>C_5	ATTCAATTCGTCTAATTAA	OSBPL11_c.713T>C_p.I238T
OSBPL11_3:125567549_T>C_4	TTCAATTCGTCTAATTAAG	OSBPL11_c.713T>C_p.I238T
OSBPL11_3:125567549_T>C_3	TCAATTCGTCTAATTAAGT	OSBPL11_c.713T>C_p.I238T
OSBPL11_3:125567549_T>C_2	CAATTCGTCTAATTAAGTC	OSBPL11_c.713T>C_p.I238T
ORC1_1:52396282_A>G_6	GGAATGAGAAGAAATTCAG	ORC1_c.485A>G_p.E162G
ORC1_1:52396282_A>G_5	GAATGAGAAGAAATTCAGG	ORC1_c.485A>G_p.E162G
ORC1_1:52396282_A>G_4	AATGAGAAGAAATTCAGGC	ORC1_c.485A>G_p.E162G
ORC1_1:52396282_A>G_3	ATGAGAAGAAATTCAGGCC	ORC1_c.485A>G_p.E162G
ORC1_1:52396282_A>G_2	TGAGAAGAAATTCAGGCCA	ORC1_c.485A>G_p.E162G
ORC1_1:52374893_T>C_6	CAGAGGAATTTCTTAAAGG	ORC1_c.2308T>C_p.S770P
ORC1_1:52374893_T>C_5	AGAGGAATTTCTTAAAGGA	ORC1_c.2308T>C_p.S770P
ORC1_1:52374893_T>C_4	GAGGAATTTCTTAAAGGAA	ORC1_c.2308T>C_p.S770P
ORC1_1:52374893_T>C_3	AGGAATTTCTTAAAGGAAA	ORC1_c.2308T>C_p.S770P
ORC1_1:52374893_T>C_2	GGAATTTCTTAAAGGAAAC	ORC1_c.2308T>C_p.S770P
OR8B4_11:124424720_T>C_6	GGATTTATCCCAATTAAGG	OR8B4_c.152T>C_p.I51T
OR8B4_11:124424720_T>C_5	GATTTATCCCAATTAAGGT	OR8B4_c.152T>C_p.I51T
OR8B4_11:124424720_T>C_4	ATTTATCCCAATTAAGGTG	OR8B4_c.152T>C_p.I51T
OR8B4_11:124424720_T>C_3	TTTATCCCAATTAAGGTGA	OR8B4_c.152T>C_p.I51T
OR8B4_11:124424720_T>C_2	TTATCCCAATTAAGGTGAT	OR8B4_c.152T>C_p.I51T
OR7D4_19:9214767_A>G_6	AACTGCAGCCCGTCCTCTT	OR7D4_c.71A>G_p.Q24R
OR7D4_19:9214767_A>G_5	ACTGCAGCCCGTCCTCTTT	OR7D4_c.71A>G_p.Q24R
OR7D4_19:9214767_A>G_4	CTGCAGCCCGTCCTCTTTG	OR7D4_c.71A>G_p.Q24R
OR7D4_19:9214767_A>G_3	TGCAGCCCGTCCTCTTTGG	OR7D4_c.71A>G_p.Q24R
OR7D4_19:9214767_A>G_2	GCAGCCCGTCCTCTTTGGG	OR7D4_c.71A>G_p.Q24R
OR6C74_12:55247916_T>C_6	ACTAATACCAGTGTAACCA	OR6C74_c.629T>C_p.V210A
OR6C74_12:55247916_T>C_5	CTAATACCAGTGTAACCAG	OR6C74_c.629T>C_p.V210A
OR6C74_12:55247916_T>C_4	TAATACCAGTGTAACCAGG	OR6C74_c.629T>C_p.V210A
OR6C74_12:55247916_T>C_3	AATACCAGTGTAACCAGGA	OR6C74_c.629T>C_p.V210A
OR6C74_12:55247916_T>C_2	ATACCAGTGTAACCAGGAG	OR6C74_c.629T>C_p.V210A
OR5B3_11:58403279_T>C_6	AATACAATAATTCCCAGGT	OR5B3_c.131T>C_p.I44T
OR5B3_11:58403279_T>C_5	ATACAATAATTCCCAGGTT	OR5B3_c.131T>C_p.I44T
OR5B3_11:58403279_T>C_4	TACAATAATTCCCAGGTTT	OR5B3_c.131T>C_p.I44T
OR5B3_11:58403279_T>C_3	ACAATAATTCCCAGGTTTC	OR5B3_c.131T>C_p.I44T
OR5B3_11:58403279_T>C_2	CAATAATTCCCAGGTTTCC	OR5B3_c.131T>C_p.I44T
OR5AS1_11:56031287_A>G_6	TAATTTATAGTTTCAGAAA	OR5AS1_c.869A>G_p.Y290C
OR5AS1_11:56031287_A>G_5	AATTTATAGTTTCAGAAAC	OR5AS1_c.869A>G_p.Y290C
OR5AS1_11:56031287_A>G_4	ATTTATAGTTTCAGAAACA	OR5AS1_c.869A>G_p.Y290C
OR5AS1_11:56031287_A>G_3	TTTATAGTTTCAGAAACAA	OR5AS1_c.869A>G_p.Y290C
OR5AS1_11:56031287_A>G_2	TTATAGTTTCAGAAACAAG	OR5AS1_c.869A>G_p.Y290C
OR56A4_11:6002971_T>C_6	CAGTGGAGTCATTGCTGGG	OR56A4_c.178T>C_p.S60P
OR56A4_11:6002971_T>C_5	AGTGGAGTCATTGCTGGGA	OR56A4_c.178T>C_p.S60P
OR56A4_11:6002971_T>C_4	GTGGAGTCATTGCTGGGAG	OR56A4_c.178T>C_p.S60P
OR56A4_11:6002971_T>C_3	TGGAGTCATTGCTGGGAGA	OR56A4_c.178T>C_p.S60P
OR56A4_11:6002971_T>C_2	GGAGTCATTGCTGGGAGAT	OR56A4_c.178T>C_p.S60P
OR52M1_11:4545543_T>C_6	ATGGCAAGGAAGATGCCTG	OR52M1_c.353T>C_p.L118P
OR52M1_11:4545543_T>C_5	TGGCAAGGAAGATGCCTGA	OR52M1_c.353T>C_p.L118P
OR52M1_11:4545543_T>C_4	GGCAAGGAAGATGCCTGAC	OR52M1_c.353T>C_p.L118P
OR52M1_11:4545543_T>C_3	GCAAGGAAGATGCCTGACT	OR52M1_c.353T>C_p.L118P
OR52M1_11:4545543_T>C_2	CAAGGAAGATGCCTGACTC	OR52M1_c.353T>C_p.L118P
OR4N4_15:22095363_T>C_6	TTCATCAATGGAAAGATCA	OR4N4_c.842T>C_p.L281S
OR4N4_15:22095363_T>C_5	TCATCAATGGAAAGATCAC	OR4N4_c.842T>C_p.L281S
OR4N4_15:22095363_T>C_4	CATCAATGGAAAGATCACT	OR4N4_c.842T>C_p.L281S
OR4N4_15:22095363_T>C_3	ATCAATGGAAAGATCACTG	OR4N4_c.842T>C_p.L281S
OR4N4_15:22095363_T>C_2	TCAATGGAAAGATCACTGT	OR4N4_c.842T>C_p.L281S
OR2T3_1:248473897_T>C_6	CACAGAAAAAACTCAGGAT	OR2T3_c.547T>C_p.F183L
OR2T3_1:248473897_T>C_5	ACAGAAAAAACTCAGGATT	OR2T3_c.547T>C_p.F183L
OR2T3_1:248473897_T>C_4	CAGAAAAAACTCAGGATTT	OR2T3_c.547T>C_p.F183L
OR2T3_1:248473897_T>C_3	AGAAAAAACTCAGGATTTT	OR2T3_c.547T>C_p.F183L
OR2T3_1:248473897_T>C_2	GAAAAAACTCAGGATTTTC	OR2T3_c.547T>C_p.F183L
OR2T27_1:248650394_T>C_6	AACTGCATGGTGACGGGGG	OR2T27_c.491T>C_p.M164T
OR2T27_1:248650394_T>C_5	ACTGCATGGTGACGGGGGT	OR2T27_c.491T>C_p.M164T
OR2T27_1:248650394_T>C_4	CTGCATGGTGACGGGGGTG	OR2T27_c.491T>C_p.M164T
OR2T27_1:248650394_T>C_3	TGCATGGTGACGGGGGTGA	OR2T27_c.491T>C_p.M164T
OR2T27_1:248650394_T>C_2	GCATGGTGACGGGGGTGAG	OR2T27_c.491T>C_p.M164T
OR13C4_9:104526360_T>C_6	CCCCATAAAACATGGAAAC	OR13C4_c.850T>C_p.Y284H
OR13C4_9:104526360_T>C_5	CCCATAAAACATGGAAACA	OR13C4_c.850T>C_p.Y284H
OR13C4_9:104526360_T>C_4	CCATAAAACATGGAAACAA	OR13C4_c.850T>C_p.Y284H
OR13C4_9:104526360_T>C_3	CATAAAACATGGAAACAAG	OR13C4_c.850T>C_p.Y284H
OR13C4_9:104526360_T>C_2	ATAAAACATGGAAACAAGC	OR13C4_c.850T>C_p.Y284H
OR10S1_11:123976802_T>C_6	GGGTTGAGCATTGGAGTTA	OR10S1_c.890T>C_p.L297P
OR10S1_11:123976802_T>C_5	GGTTGAGCATTGGAGTTAC	OR10S1_c.890T>C_p.L297P
OR10S1_11:123976802_T>C_4	GTTGAGCATTGGAGTTACG	OR10S1_c.890T>C_p.L297P
OR10S1_11:123976802_T>C_3	TTGAGCATTGGAGTTACGA	OR10S1_c.890T>C_p.L297P
OR10S1_11:123976802_T>C_2	TGAGCATTGGAGTTACGAT	OR10S1_c.890T>C_p.L297P
NUP210L_1:154060553_A>G_6	AAGCAGAAAGCTCTGTTGA	NUP210L_c.2837A>G_p.E946G
NUP210L_1:154060553_A>G_5	AGCAGAAAGCTCTGTTGAG	NUP210L_c.2837A>G_p.E946G
NUP210L_1:154060553_A>G_4	GCAGAAAGCTCTGTTGAGG	NUP210L_c.2837A>G_p.E946G
NUP210L_1:154060553_A>G_3	CAGAAAGCTCTGTTGAGGT	NUP210L_c.2837A>G_p.E946G
NUP210L_1:154060553_A>G_2	AGAAAGCTCTGTTGAGGTG	NUP210L_c.2837A>G_p.E946G
NSUN6_10:18585978_T>C_6	AGTTTAACCGCCTTTGTTC	NSUN6_c.893T>C_p.V298A
NSUN6_10:18585978_T>C_5	GTTTAACCGCCTTTGTTCC	NSUN6_c.893T>C_p.V298A
NSUN6_10:18585978_T>C_4	TTTAACCGCCTTTGTTCCA	NSUN6_c.893T>C_p.V298A
NSUN6_10:18585978_T>C_3	TTAACCGCCTTTGTTCCAT	NSUN6_c.893T>C_p.V298A
NSUN6_10:18585978_T>C_2	TAACCGCCTTTGTTCCATC	NSUN6_c.893T>C_p.V298A
NRAS_1:114713908_A>G_6	CTGGACAAGAAGAGTACAG	NRAS_c.182A>G_p.Q61R
NRAS_1:114713908_A>G_5	TGGACAAGAAGAGTACAGT	NRAS_c.182A>G_p.Q61R
NRAS_1:114713908_A>G_4	GGACAAGAAGAGTACAGTG	NRAS_c.182A>G_p.Q61R
NRAS_1:114713908_A>G_3	GACAAGAAGAGTACAGTGC	NRAS_c.182A>G_p.Q61R
NRAS_1:114713908_A>G_2	ACAAGAAGAGTACAGTGCC	NRAS_c.182A>G_p.Q61R
NRAP_10:113622137_T>C_6	GCCCCAATGAGCTTCCCTC	NRAP_c.2501T>C_p.I834T
NRAP_10:113622137_T>C_5	CCCCAATGAGCTTCCCTCT	NRAP_c.2501T>C_p.I834T
NRAP_10:113622137_T>C_4	CCCAATGAGCTTCCCTCTG	NRAP_c.2501T>C_p.I834T
NRAP_10:113622137_T>C_3	CCAATGAGCTTCCCTCTGG	NRAP_c.2501T>C_p.I834T
NRAP_10:113622137_T>C_2	CAATGAGCTTCCCTCTGGA	NRAP_c.2501T>C_p.I834T
non-targeting_control_075	CGCGTCAAGCGACGCGATT	non-targeting_control_075
non-targeting_control_074	GACGCGTTATGCGCGATTA	non-targeting_control_074
non-targeting_control_073	ATACGCCGCGCGGTCGAAA	non-targeting_control_073
non-targeting_control_072	TCGTACGACCGGACGTCTA	non-targeting_control_072
non-targeting_control_071	CCTGCGTCGACCGTAACGC	non-targeting_control_071
non-targeting_control_070	CACTTACGCTCGTCGGTAA	non-targeting_control_070
non-targeting_control_069	GGGATTCGTCGATCGATGT	non-targeting_control_069
non-targeting_control_068	AGCGGCTCGTACGCGAAAG	non-targeting_control_068
non-targeting_control_067	CCTTCGAACGATCGGCGTA	non-targeting_control_067
non-targeting_control_066	AGCCGCCGAACGACGTATA	non-targeting_control_066
non-targeting_control_065	AGCGACGTTCGTCCGATAG	non-targeting_control_065
non-targeting_control_064	AGGGGTCGTACGCGAATAC	non-targeting_control_064
non-targeting_control_063	TACGTATACGTTTCGCGCA	non-targeting_control_063
non-targeting_control_062	AAAACGAGCGGAACGCGAT	non-targeting_control_062
non-targeting_control_061	GTCCGCAATTTGCGACGAT	non-targeting_control_061
non-targeting_control_060	TACGCTAGACTACGCTCGT	non-targeting_control_060
non-targeting_control_059	CCTGCCCGTACGTCGCGAT	non-targeting_control_059
non-targeting_control_058	TACGTCCGACTATCGTACG	non-targeting_control_058
non-targeting_control_057	GACTCCGCTCGTACGATTA	non-targeting_control_057
non-targeting_control_056	ATATCGCGGCGTCGTTACA	non-targeting_control_056
non-targeting_control_055	GAGTTGGTCGAACCGTCGC	non-targeting_control_055
non-targeting_control_054	GGGGTTTCATACGCGCGCA	non-targeting_control_054
non-targeting_control_053	ATCGCAATATCTCGCGACA	non-targeting_control_053
non-targeting_control_052	CCCGAATCGTCGTCGCATT	non-targeting_control_052
non-targeting_control_051	GGACGCGATCGAGCGTATA	non-targeting_control_051
non-targeting_control_050	GAATAATTCGCGCCGTACG	non-targeting_control_050
non-targeting_control_049	CAGCGGTCCGAAACGTAAG	non-targeting_control_049
non-targeting_control_048	CCAACCGGTCAATCGTACG	non-targeting_control_048
non-targeting_control_047	AATCGATCAAGCGCGCGAC	non-targeting_control_047
non-targeting_control_046	GCTATAGCGCGCGAATCGG	non-targeting_control_046
non-targeting_control_045	ACACAACGCGGTCCGCGTA	non-targeting_control_045
non-targeting_control_044	GTCGATAGGTCGGATACGC	non-targeting_control_044
non-targeting_control_043	AGCGCTTATTACGCGCAGT	non-targeting_control_043
non-targeting_control_042	ATCATCGACGCGTACGCTT	non-targeting_control_042
non-targeting_control_041	CAACGATAACGTCCGATTA	non-targeting_control_041
non-targeting_control_040	TCTCGCAAGCGCGCCAATA	non-targeting_control_040
non-targeting_control_039	CTTAGTCCGCGCGTTATAC	non-targeting_control_039
non-targeting_control_038	CATGTTAGTTACGCGACGG	non-targeting_control_038
non-targeting_control_037	CATCGCGTCGTCGATATTC	non-targeting_control_037
non-targeting_control_036	CGACTCGGCGCCGCGACAT	non-targeting_control_036
non-targeting_control_035	GAACAACGCGCCGTTGTAC	non-targeting_control_035
non-targeting_control_034	ATTCGCGCGCGATCCGATA	non-targeting_control_034
non-targeting_control_033	AGGTCGTACGGCGGATAAC	non-targeting_control_033
non-targeting_control_032	CCCGTCGCGGTATGATCGG	non-targeting_control_032
non-targeting_control_031	TAGATAAGCATCGCGCGTA	non-targeting_control_031
non-targeting_control_030	ATCGCCGTTAACGGTCGTT	non-targeting_control_030
non-targeting_control_029	AGTGAAGACGATCGCGCGT	non-targeting_control_029
non-targeting_control_028	CCAAGTCGTCCGGCGATTC	non-targeting_control_028
non-targeting_control_027	GGACCGTTAACGATACGCG	non-targeting_control_027
non-targeting_control_026	GTAAGTATCGCGCGCCGAA	non-targeting_control_026
non-targeting_control_025	CACGTCGATAACTCGACGG	non-targeting_control_025
non-targeting_control_024	TTCCGTTTACGTCGTCGTT	non-targeting_control_024
non-targeting_control_023	AATCGTCGCGACGTATAAG	non-targeting_control_023
non-targeting_control_022	GTCGACTGACGTATACGAT	non-targeting_control_022
non-targeting_control_021	AAGCTATTTATCGCGTCGT	non-targeting_control_021
non-targeting_control_020	CCTCGCGGTCGATCGACCT	non-targeting_control_020
non-targeting_control_019	CCCGTATCCTTTCGACGCG	non-targeting_control_019
non-targeting_control_018	CCGATGCGTACGTCGCGCT	non-targeting_control_018
non-targeting_control_017	TATCGCGACCGAACGAACG	non-targeting_control_017
non-targeting_control_016	GCGTATCCGATCACGCGTC	non-targeting_control_016
non-targeting_control_015	ACAACGCGTCGCGATAGTG	non-targeting_control_015
non-targeting_control_014	GGACGACGGGTCGTTACGA	non-targeting_control_014
non-targeting_control_013	GCTCGCACTACACGTCGAA	non-targeting_control_013
non-targeting_control_012	GTTATCGCCGGCCTAACGC	non-targeting_control_012
non-targeting_control_011	AATACTCGATCGACGACTA	non-targeting_control_011
non-targeting_control_010	CTGTCGCAAGGACCGACAT	non-targeting_control_010
non-targeting_control_009	AGGGACGTAATCCCGATCG	non-targeting_control_009
non-targeting_control_008	CTCCGATTATACCGATCGG	non-targeting_control_008
non-targeting_control_007	CGTTCCGGTCGTCGACCGT	non-targeting_control_007
non-targeting_control_006	CCTGCTAGCGTATCGGATC	non-targeting_control_006
non-targeting_control_005	GTCGATGTTCGATCGAACG	non-targeting_control_005
non-targeting_control_004	AACGCACTATCGTGCGCGA	non-targeting_control_004
non-targeting_control_003	CGCGATTATACGCGCTAAC	non-targeting_control_003
non-targeting_control_002	TGATTCCGTCGCGCGCATC	non-targeting_control_002
non-targeting_control_001	GCCGTAACGCTATCCGGTC	non-targeting_control_001
NLRP6_11:280990_A>G_6	CAGTGTACCTGCTTTTCAT	NLRP6_c.1256A>G_p.Y419C
NLRP6_11:280990_A>G_5	AGTGTACCTGCTTTTCATC	NLRP6_c.1256A>G_p.Y419C
NLRP6_11:280990_A>G_4	GTGTACCTGCTTTTCATCA	NLRP6_c.1256A>G_p.Y419C
NLRP6_11:280990_A>G_3	TGTACCTGCTTTTCATCAC	NLRP6_c.1256A>G_p.Y419C
NLRP6_11:280990_A>G_2	GTACCTGCTTTTCATCACC	NLRP6_c.1256A>G_p.Y419C
NLN_5:65758706_A>G_6	ACAAGAACTGAGGAGCTCA	NLN_c.181A>G_p.T61A
NLN_5:65758706_A>G_5	CAAGAACTGAGGAGCTCAT	NLN_c.181A>G_p.T61A
NLN_5:65758706_A>G_4	AAGAACTGAGGAGCTCATT	NLN_c.181A>G_p.T61A
NLN_5:65758706_A>G_3	AGAACTGAGGAGCTCATTG	NLN_c.181A>G_p.T61A
NLN_5:65758706_A>G_2	GAACTGAGGAGCTCATTGT	NLN_c.181A>G_p.T61A
NKAIN1_1:31188096_T>C_6	ATGCCCAGGATGACTGCCA	NKAIN1_c.146T>C_p.L49P
NKAIN1_1:31188096_T>C_5	TGCCCAGGATGACTGCCAT	NKAIN1_c.146T>C_p.L49P
NKAIN1_1:31188096_T>C_4	GCCCAGGATGACTGCCATG	NKAIN1_c.146T>C_p.L49P
NKAIN1_1:31188096_T>C_3	CCCAGGATGACTGCCATGA	NKAIN1_c.146T>C_p.L49P
NKAIN1_1:31188096_T>C_2	CCAGGATGACTGCCATGAT	NKAIN1_c.146T>C_p.L49P
NINJ2_12:566028_T>C_6	TGTAGTAGTGAGAGGATGG	NINJ2_c.322T>C_p.Y108H
NINJ2_12:566028_T>C_5	GTAGTAGTGAGAGGATGGT	NINJ2_c.322T>C_p.Y108H
NINJ2_12:566028_T>C_4	TAGTAGTGAGAGGATGGTC	NINJ2_c.322T>C_p.Y108H
NINJ2_12:566028_T>C_3	AGTAGTGAGAGGATGGTCC	NINJ2_c.322T>C_p.Y108H
NINJ2_12:566028_T>C_2	GTAGTGAGAGGATGGTCCC	NINJ2_c.322T>C_p.Y108H
NFE2L3_7:26185635_T>C_6	CTACTAAAAATATCATGAT	NFE2L3_c.1937T>C_p.F646S
NFE2L3_7:26185635_T>C_5	TACTAAAAATATCATGATA	NFE2L3_c.1937T>C_p.F646S
NFE2L3_7:26185635_T>C_4	ACTAAAAATATCATGATAA	NFE2L3_c.1937T>C_p.F646S
NFE2L3_7:26185635_T>C_3	CTAAAAATATCATGATAAA	NFE2L3_c.1937T>C_p.F646S
NFE2L3_7:26185635_T>C_2	TAAAAATATCATGATAAAG	NFE2L3_c.1937T>C_p.F646S
NFE2L2_2:177234231_A>G_6	ATATAGATCTTGGAGTAAG	NFE2L2_c.38A>G_p.D13G
NFE2L2_2:177234231_A>G_5	TATAGATCTTGGAGTAAGT	NFE2L2_c.38A>G_p.D13G
NFE2L2_2:177234231_A>G_4	ATAGATCTTGGAGTAAGTC	NFE2L2_c.38A>G_p.D13G
NFE2L2_2:177234231_A>G_3	TAGATCTTGGAGTAAGTCG	NFE2L2_c.38A>G_p.D13G
NFE2L2_2:177234231_A>G_2	AGATCTTGGAGTAAGTCGA	NFE2L2_c.38A>G_p.D13G
NFE2L2_2:177234150_A>G_6	TTGAAAAGGAAAGACAAGA	NFE2L2_c.167A>G_p.K56R
NFE2L2_2:177234150_A>G_5	TGAAAAGGAAAGACAAGAA	NFE2L2_c.167A>G_p.K56R
NFE2L2_2:177234150_A>G_4	GAAAAGGAAAGACAAGAAC	NFE2L2_c.167A>G_p.K56R
NFE2L2_2:177234150_A>G_3	AAAAGGAAAGACAAGAACA	NFE2L2_c.167A>G_p.K56R
NFE2L2_2:177234150_A>G_2	AAAGGAAAGACAAGAACAA	NFE2L2_c.167A>G_p.K56R
NFE2L2_2:177234072_A>G_6	CAGGTGAATTTCTCCCAAT	NFE2L2_c.197A>G_p.E66G
NFE2L2_2:177234072_A>G_5	AGGTGAATTTCTCCCAATT	NFE2L2_c.197A>G_p.E66G
NFE2L2_2:177234072_A>G_4	GGTGAATTTCTCCCAATTC	NFE2L2_c.197A>G_p.E66G
NFE2L2_2:177234072_A>G_3	GTGAATTTCTCCCAATTCA	NFE2L2_c.197A>G_p.E66G
NFE2L2_2:177234072_A>G_2	TGAATTTCTCCCAATTCAG	NFE2L2_c.197A>G_p.E66G
NFATC2_20:51432241_A>G_6	CCGGTCAGTCAAGGTCAGA	NFATC2_c.2548A>G_p.S850G
NFATC2_20:51432241_A>G_5	CGGTCAGTCAAGGTCAGAG	NFATC2_c.2548A>G_p.S850G
NFATC2_20:51432241_A>G_4	GGTCAGTCAAGGTCAGAGG	NFATC2_c.2548A>G_p.S850G
NFATC2_20:51432241_A>G_3	GTCAGTCAAGGTCAGAGGC	NFATC2_c.2548A>G_p.S850G
NFATC2_20:51432241_A>G_2	TCAGTCAAGGTCAGAGGCT	NFATC2_c.2548A>G_p.S850G
NEUROD6_7:31338353_T>C_6	ACCTGAACATGGCACCCTG	NEUROD6_c.916T>C_p.F306L
NEUROD6_7:31338353_T>C_5	CCTGAACATGGCACCCTGC	NEUROD6_c.916T>C_p.F306L
NEUROD6_7:31338353_T>C_4	CTGAACATGGCACCCTGCC	NEUROD6_c.916T>C_p.F306L
NEUROD6_7:31338353_T>C_3	TGAACATGGCACCCTGCCC	NEUROD6_c.916T>C_p.F306L
NEUROD6_7:31338353_T>C_2	GAACATGGCACCCTGCCCA	NEUROD6_c.916T>C_p.F306L
NELL2_12:44522067_A>G_6	TCCATCAAAATGGGGAAAC	NELL2_c.2258A>G_p.Q753R
NELL2_12:44522067_A>G_5	CCATCAAAATGGGGAAACT	NELL2_c.2258A>G_p.Q753R
NELL2_12:44522067_A>G_4	CATCAAAATGGGGAAACTT	NELL2_c.2258A>G_p.Q753R
NELL2_12:44522067_A>G_3	ATCAAAATGGGGAAACTTT	NELL2_c.2258A>G_p.Q753R
NELL2_12:44522067_A>G_2	TCAAAATGGGGAAACTTTG	NELL2_c.2258A>G_p.Q753R
NECAP2_1:16440771_A>G_6	GAGGAGAGCGGGTACGAGT	NECAP2_c.10A>G_p.S4G
NECAP2_1:16440771_A>G_5	AGGAGAGCGGGTACGAGTC	NECAP2_c.10A>G_p.S4G
NECAP2_1:16440771_A>G_4	GGAGAGCGGGTACGAGTCG	NECAP2_c.10A>G_p.S4G
NECAP2_1:16440771_A>G_3	GAGAGCGGGTACGAGTCGG	NECAP2_c.10A>G_p.S4G
NECAP2_1:16440771_A>G_2	AGAGCGGGTACGAGTCGGT	NECAP2_c.10A>G_p.S4G
NDUFB8_10:100526512_A>G_6	GTGGATACATCCCCCACAC	NDUFB8_c.355A>G_p.T119A
NDUFB8_10:100526512_A>G_5	TGGATACATCCCCCACACC	NDUFB8_c.355A>G_p.T119A
NDUFB8_10:100526512_A>G_4	GGATACATCCCCCACACCT	NDUFB8_c.355A>G_p.T119A
NDUFB8_10:100526512_A>G_3	GATACATCCCCCACACCTG	NDUFB8_c.355A>G_p.T119A
NDUFB8_10:100526512_A>G_2	ATACATCCCCCACACCTGT	NDUFB8_c.355A>G_p.T119A
NCR2_6:41336200_A>G_6	TGGTGTAAGGAGGCTTCAG	NCR2_c.166A>G_p.K56E
NCR2_6:41336200_A>G_5	GGTGTAAGGAGGCTTCAGC	NCR2_c.166A>G_p.K56E
NCR2_6:41336200_A>G_4	GTGTAAGGAGGCTTCAGCA	NCR2_c.166A>G_p.K56E
NCR2_6:41336200_A>G_3	TGTAAGGAGGCTTCAGCAC	NCR2_c.166A>G_p.K56E
NCR2_6:41336200_A>G_2	GTAAGGAGGCTTCAGCACT	NCR2_c.166A>G_p.K56E
NCOA7_6:125889721_T>C_6	ATGTCTATTCCCCCTGGTT	NCOA7_c.1667T>C_p.I556T
NCOA7_6:125889721_T>C_5	TGTCTATTCCCCCTGGTTC	NCOA7_c.1667T>C_p.I556T
NCOA7_6:125889721_T>C_4	GTCTATTCCCCCTGGTTCA	NCOA7_c.1667T>C_p.I556T
NCOA7_6:125889721_T>C_3	TCTATTCCCCCTGGTTCAA	NCOA7_c.1667T>C_p.I556T
NCOA7_6:125889721_T>C_2	CTATTCCCCCTGGTTCAAT	NCOA7_c.1667T>C_p.I556T
NBPF3_1:21483357_T>C_6	TCTGGAAGGCCAGGTGGTG	NBPF3_c.1873T>C_p.F625L
NBPF3_1:21483357_T>C_5	CTGGAAGGCCAGGTGGTGC	NBPF3_c.1873T>C_p.F625L
NBPF3_1:21483357_T>C_4	TGGAAGGCCAGGTGGTGCC	NBPF3_c.1873T>C_p.F625L
NBPF3_1:21483357_T>C_3	GGAAGGCCAGGTGGTGCCT	NBPF3_c.1873T>C_p.F625L
NBPF3_1:21483357_T>C_2	GAAGGCCAGGTGGTGCCTT	NBPF3_c.1873T>C_p.F625L
NBN_8:89980789_A>G_6	TAAACAATTGGACAGAAGA	NBN_c.425A>G_p.N142S
NBN_8:89980789_A>G_5	AAACAATTGGACAGAAGAA	NBN_c.425A>G_p.N142S
NBN_8:89980789_A>G_4	AACAATTGGACAGAAGAAT	NBN_c.425A>G_p.N142S
NBN_8:89980789_A>G_3	ACAATTGGACAGAAGAATG	NBN_c.425A>G_p.N142S
NBN_8:89980789_A>G_2	CAATTGGACAGAAGAATGC	NBN_c.425A>G_p.N142S
NAGK_2:71068558_A>G_6	ACGCGCACAGGGAGTCAGC	NAGK_c.13A>G_p.T5A
NAGK_2:71068558_A>G_5	CGCGCACAGGGAGTCAGCT	NAGK_c.13A>G_p.T5A
NAGK_2:71068558_A>G_4	GCGCACAGGGAGTCAGCTG	NAGK_c.13A>G_p.T5A
NAGK_2:71068558_A>G_3	CGCACAGGGAGTCAGCTGG	NAGK_c.13A>G_p.T5A
NAGK_2:71068558_A>G_2	GCACAGGGAGTCAGCTGGC	NAGK_c.13A>G_p.T5A
MYO7B_2:127629678_A>G_6	AGGGGGACCTGTTGGTCCT	MYO7B_c.4580A>G_p.D1527G
MYO7B_2:127629678_A>G_5	GGGGGACCTGTTGGTCCTC	MYO7B_c.4580A>G_p.D1527G
MYO7B_2:127629678_A>G_4	GGGGACCTGTTGGTCCTCA	MYO7B_c.4580A>G_p.D1527G
MYO7B_2:127629678_A>G_3	GGGACCTGTTGGTCCTCAC	MYO7B_c.4580A>G_p.D1527G
MYO7B_2:127629678_A>G_2	GGACCTGTTGGTCCTCACA	MYO7B_c.4580A>G_p.D1527G
MYO5C_15:52244549_T>C_6	TACCAAACTGGTACTGATT	MYO5C_c.2197T>C_p.F733L
MYO5C_15:52244549_T>C_5	ACCAAACTGGTACTGATTA	MYO5C_c.2197T>C_p.F733L
MYO5C_15:52244549_T>C_4	CCAAACTGGTACTGATTAG	MYO5C_c.2197T>C_p.F733L
MYO5C_15:52244549_T>C_3	CAAACTGGTACTGATTAGA	MYO5C_c.2197T>C_p.F733L
MYO5C_15:52244549_T>C_2	AAACTGGTACTGATTAGAA	MYO5C_c.2197T>C_p.F733L
MYO18A_17:29092383_T>C_6	AGGTGCAGGTCTTCGATCT	MYO18A_c.5147T>C_p.L1716P
MYO18A_17:29092383_T>C_5	GGTGCAGGTCTTCGATCTC	MYO18A_c.5147T>C_p.L1716P
MYO18A_17:29092383_T>C_4	GTGCAGGTCTTCGATCTCC	MYO18A_c.5147T>C_p.L1716P
MYO18A_17:29092383_T>C_3	TGCAGGTCTTCGATCTCCA	MYO18A_c.5147T>C_p.L1716P
MYO18A_17:29092383_T>C_2	GCAGGTCTTCGATCTCCAC	MYO18A_c.5147T>C_p.L1716P
MYH4_17:10459384_A>G_6	TCACCAACGAGAAACTGCA	MYH4_c.1454A>G_p.N485S
MYH4_17:10459384_A>G_5	CACCAACGAGAAACTGCAA	MYH4_c.1454A>G_p.N485S
MYH4_17:10459384_A>G_4	ACCAACGAGAAACTGCAAC	MYH4_c.1454A>G_p.N485S
MYH4_17:10459384_A>G_3	CCAACGAGAAACTGCAACA	MYH4_c.1454A>G_p.N485S
MYH4_17:10459384_A>G_2	CAACGAGAAACTGCAACAG	MYH4_c.1454A>G_p.N485S
MYH1_17:10508389_T>C_6	CCAACAAAGAGGAGAGCCA	MYH1_c.1871T>C_p.F624S
MYH1_17:10508389_T>C_5	CAACAAAGAGGAGAGCCAG	MYH1_c.1871T>C_p.F624S
MYH1_17:10508389_T>C_4	AACAAAGAGGAGAGCCAGA	MYH1_c.1871T>C_p.F624S
MYH1_17:10508389_T>C_3	ACAAAGAGGAGAGCCAGAG	MYH1_c.1871T>C_p.F624S
MYH1_17:10508389_T>C_2	CAAAGAGGAGAGCCAGAGT	MYH1_c.1871T>C_p.F624S
MYBPH_1:203171424_A>G_6	GCGTGGAAGACCTGGAGGC	MYBPH_c.752A>G_p.E251G
MYBPH_1:203171424_A>G_5	CGTGGAAGACCTGGAGGCC	MYBPH_c.752A>G_p.E251G
MYBPH_1:203171424_A>G_4	GTGGAAGACCTGGAGGCCA	MYBPH_c.752A>G_p.E251G
MYBPH_1:203171424_A>G_3	TGGAAGACCTGGAGGCCAA	MYBPH_c.752A>G_p.E251G
MYBPH_1:203171424_A>G_2	GGAAGACCTGGAGGCCAAG	MYBPH_c.752A>G_p.E251G
MUSK_9:110800834_A>G_6	ATGGCAACATCCTCTCCTG	MUSK_c.2456A>G_p.N819S
MUSK_9:110800834_A>G_5	TGGCAACATCCTCTCCTGC	MUSK_c.2456A>G_p.N819S
MUSK_9:110800834_A>G_4	GGCAACATCCTCTCCTGCC	MUSK_c.2456A>G_p.N819S
MUSK_9:110800834_A>G_3	GCAACATCCTCTCCTGCCC	MUSK_c.2456A>G_p.N819S
MUSK_9:110800834_A>G_2	CAACATCCTCTCCTGCCCT	MUSK_c.2456A>G_p.N819S
MUSK_9:110787824_T>C_6	TTCACAATGTTAGGGTTGT	MUSK_c.1913T>C_p.I638T
MUSK_9:110787824_T>C_5	TCACAATGTTAGGGTTGTC	MUSK_c.1913T>C_p.I638T
MUSK_9:110787824_T>C_4	CACAATGTTAGGGTTGTCA	MUSK_c.1913T>C_p.I638T
MUSK_9:110787824_T>C_3	ACAATGTTAGGGTTGTCAA	MUSK_c.1913T>C_p.I638T
MUSK_9:110787824_T>C_2	CAATGTTAGGGTTGTCAAA	MUSK_c.1913T>C_p.I638T
MUC6_11:1016754_T>C_6	GTCACCAAGGAGGTGGAGA	MUC6_c.6047T>C_p.L2016S
MUC6_11:1016754_T>C_5	TCACCAAGGAGGTGGAGAA	MUC6_c.6047T>C_p.L2016S
MUC6_11:1016754_T>C_4	CACCAAGGAGGTGGAGAAA	MUC6_c.6047T>C_p.L2016S
MUC6_11:1016754_T>C_3	ACCAAGGAGGTGGAGAAAG	MUC6_c.6047T>C_p.L2016S
MUC6_11:1016754_T>C_2	CCAAGGAGGTGGAGAAAGG	MUC6_c.6047T>C_p.L2016S
MUC5B_11:1233822_T>C_6	GCTCCCAGGCAGCTTAGCT	MUC5B_c.2351T>C_p.L784P
MUC5B_11:1233822_T>C_5	CTCCCAGGCAGCTTAGCTT	MUC5B_c.2351T>C_p.L784P
MUC5B_11:1233822_T>C_4	TCCCAGGCAGCTTAGCTTC	MUC5B_c.2351T>C_p.L784P
MUC5B_11:1233822_T>C_3	CCCAGGCAGCTTAGCTTCC	MUC5B_c.2351T>C_p.L784P
MUC5B_11:1233822_T>C_2	CCAGGCAGCTTAGCTTCCC	MUC5B_c.2351T>C_p.L784P
MUC4_3:195785122_T>C_6	GTGGATACTGAGGAAGTTT	MUC4_c.6458T>C_p.V2153A
MUC4_3:195785122_T>C_5	TGGATACTGAGGAAGTTTC	MUC4_c.6458T>C_p.V2153A
MUC4_3:195785122_T>C_4	GGATACTGAGGAAGTTTCG	MUC4_c.6458T>C_p.V2153A
MUC4_3:195785122_T>C_3	GATACTGAGGAAGTTTCGG	MUC4_c.6458T>C_p.V2153A
MUC4_3:195785122_T>C_2	ATACTGAGGAAGTTTCGGT	MUC4_c.6458T>C_p.V2153A
MUC4_3:195785102_T>C_6	GAAGAGAGGTGGCGTGACC	MUC4_c.6478T>C_p.S2160P
MUC4_3:195785102_T>C_5	AAGAGAGGTGGCGTGACCT	MUC4_c.6478T>C_p.S2160P
MUC4_3:195785102_T>C_4	AGAGAGGTGGCGTGACCTG	MUC4_c.6478T>C_p.S2160P
MUC4_3:195785102_T>C_3	GAGAGGTGGCGTGACCTGT	MUC4_c.6478T>C_p.S2160P
MUC4_3:195785102_T>C_2	AGAGGTGGCGTGACCTGTG	MUC4_c.6478T>C_p.S2160P
MUC4_3:195780212_A>G_6	GGTGACACCACCCCTCTTC	MUC4_c.11368A>G_p.T3790A
MUC4_3:195780212_A>G_5	GTGACACCACCCCTCTTCC	MUC4_c.11368A>G_p.T3790A
MUC4_3:195780212_A>G_4	TGACACCACCCCTCTTCCT	MUC4_c.11368A>G_p.T3790A
MUC4_3:195780212_A>G_3	GACACCACCCCTCTTCCTG	MUC4_c.11368A>G_p.T3790A
MUC4_3:195780212_A>G_2	ACACCACCCCTCTTCCTGT	MUC4_c.11368A>G_p.T3790A
MUC4_3:195778877_A>G_6	GTATCCACAGGTCACGCCA	MUC4_c.12703A>G_p.T4235A
MUC4_3:195778877_A>G_5	TATCCACAGGTCACGCCAC	MUC4_c.12703A>G_p.T4235A
MUC4_3:195778877_A>G_4	ATCCACAGGTCACGCCACC	MUC4_c.12703A>G_p.T4235A
MUC4_3:195778877_A>G_3	TCCACAGGTCACGCCACCC	MUC4_c.12703A>G_p.T4235A
MUC4_3:195778877_A>G_2	CCACAGGTCACGCCACCCC	MUC4_c.12703A>G_p.T4235A
MUC16_19:8966014_A>G_6	TCTTCCACAGCTGCATCAG	MUC16_c.10756A>G_p.T3586A
MUC16_19:8966014_A>G_5	CTTCCACAGCTGCATCAGA	MUC16_c.10756A>G_p.T3586A
MUC16_19:8966014_A>G_4	TTCCACAGCTGCATCAGAT	MUC16_c.10756A>G_p.T3586A
MUC16_19:8966014_A>G_3	TCCACAGCTGCATCAGATT	MUC16_c.10756A>G_p.T3586A
MUC16_19:8966014_A>G_2	CCACAGCTGCATCAGATTC	MUC16_c.10756A>G_p.T3586A
MUC16_19:8888770_A>G_6	ACCCACAGCATCACTGAGC	MUC16_c.40729A>G_p.S13577G
MUC16_19:8888770_A>G_5	CCCACAGCATCACTGAGCT	MUC16_c.40729A>G_p.S13577G
MUC16_19:8888770_A>G_4	CCACAGCATCACTGAGCTG	MUC16_c.40729A>G_p.S13577G
MUC16_19:8888770_A>G_3	CACAGCATCACTGAGCTGG	MUC16_c.40729A>G_p.S13577G
MUC16_19:8888770_A>G_2	ACAGCATCACTGAGCTGGG	MUC16_c.40729A>G_p.S13577G
MUC16_19:8888719_A>G_6	TATGTCAATGGTGAGTAGT	MUC16_c.40780A>G_p.N13594D
MUC16_19:8888719_A>G_5	ATGTCAATGGTGAGTAGTT	MUC16_c.40780A>G_p.N13594D
MUC16_19:8888719_A>G_4	TGTCAATGGTGAGTAGTTG	MUC16_c.40780A>G_p.N13594D
MUC16_19:8888719_A>G_3	GTCAATGGTGAGTAGTTGT	MUC16_c.40780A>G_p.N13594D
MUC16_19:8888719_A>G_2	TCAATGGTGAGTAGTTGTG	MUC16_c.40780A>G_p.N13594D
MTMR9_8:11295213_A>G_6	CTGGGTACCATCATCATAA	MTMR9_c.202A>G_p.T68A
MTMR9_8:11295213_A>G_5	TGGGTACCATCATCATAAA	MTMR9_c.202A>G_p.T68A
MTMR9_8:11295213_A>G_4	GGGTACCATCATCATAAAA	MTMR9_c.202A>G_p.T68A
MTMR9_8:11295213_A>G_3	GGTACCATCATCATAAAAT	MTMR9_c.202A>G_p.T68A
MTMR9_8:11295213_A>G_2	GTACCATCATCATAAAATG	MTMR9_c.202A>G_p.T68A
MTERF3_8:96239555_T>C_6	CAAAATATTTCATCAGGAA	MTERF3_c.1190T>C_p.I397T
MTERF3_8:96239555_T>C_5	AAAATATTTCATCAGGAAT	MTERF3_c.1190T>C_p.I397T
MTERF3_8:96239555_T>C_4	AAATATTTCATCAGGAATA	MTERF3_c.1190T>C_p.I397T
MTERF3_8:96239555_T>C_3	AATATTTCATCAGGAATAG	MTERF3_c.1190T>C_p.I397T
MTERF3_8:96239555_T>C_2	ATATTTCATCAGGAATAGA	MTERF3_c.1190T>C_p.I397T
MSN_X:65736881_A>G_6	TGATGGAGAGGCTGAAGCA	MSN_c.1046A>G_p.E349G
MSN_X:65736881_A>G_5	GATGGAGAGGCTGAAGCAG	MSN_c.1046A>G_p.E349G
MSN_X:65736881_A>G_4	ATGGAGAGGCTGAAGCAGA	MSN_c.1046A>G_p.E349G
MSN_X:65736881_A>G_3	TGGAGAGGCTGAAGCAGAT	MSN_c.1046A>G_p.E349G
MSN_X:65736881_A>G_2	GGAGAGGCTGAAGCAGATC	MSN_c.1046A>G_p.E349G
MOV10_1:112674980_T>C_6	CCCCGAACGACCAGGAAAC	MOV10_c.68T>C_p.V23A
MOV10_1:112674980_T>C_5	CCCGAACGACCAGGAAACT	MOV10_c.68T>C_p.V23A
MOV10_1:112674980_T>C_4	CCGAACGACCAGGAAACTC	MOV10_c.68T>C_p.V23A
MOV10_1:112674980_T>C_3	CGAACGACCAGGAAACTCT	MOV10_c.68T>C_p.V23A
MOV10_1:112674980_T>C_2	GAACGACCAGGAAACTCTC	MOV10_c.68T>C_p.V23A
MORC1_3:108979647_A>G_6	CGATGGAAGATGTGAATCT	MORC1_c.2345A>G_p.E782G
MORC1_3:108979647_A>G_5	GATGGAAGATGTGAATCTA	MORC1_c.2345A>G_p.E782G
MORC1_3:108979647_A>G_4	ATGGAAGATGTGAATCTAA	MORC1_c.2345A>G_p.E782G
MORC1_3:108979647_A>G_3	TGGAAGATGTGAATCTAAG	MORC1_c.2345A>G_p.E782G
MORC1_3:108979647_A>G_2	GGAAGATGTGAATCTAAGT	MORC1_c.2345A>G_p.E782G
MMRN2_10:86936757_A>G_6	TTCCTGATGTTTAAGACCT	MMRN2_c.2836A>G_p.M946V
MMRN2_10:86936757_A>G_5	TCCTGATGTTTAAGACCTG	MMRN2_c.2836A>G_p.M946V
MMRN2_10:86936757_A>G_4	CCTGATGTTTAAGACCTGA	MMRN2_c.2836A>G_p.M946V
MMRN2_10:86936757_A>G_3	CTGATGTTTAAGACCTGAA	MMRN2_c.2836A>G_p.M946V
MMRN2_10:86936757_A>G_2	TGATGTTTAAGACCTGAAC	MMRN2_c.2836A>G_p.M946V
MMP19_12:55839498_A>G_6	CTCTCTATGGTCAGTCCCT	MMP19_c.764A>G_p.Y255C
MMP19_12:55839498_A>G_5	TCTCTATGGTCAGTCCCTC	MMP19_c.764A>G_p.Y255C
MMP19_12:55839498_A>G_4	CTCTATGGTCAGTCCCTCC	MMP19_c.764A>G_p.Y255C
MMP19_12:55839498_A>G_3	TCTATGGTCAGTCCCTCCC	MMP19_c.764A>G_p.Y255C
MMP19_12:55839498_A>G_2	CTATGGTCAGTCCCTCCCC	MMP19_c.764A>G_p.Y255C
MLH3_14:75048299_A>G_6	AGCAAAATGACAGAGCCAT	MLH3_c.1357A>G_p.M453V
MLH3_14:75048299_A>G_5	GCAAAATGACAGAGCCATC	MLH3_c.1357A>G_p.M453V
MLH3_14:75048299_A>G_4	CAAAATGACAGAGCCATCT	MLH3_c.1357A>G_p.M453V
MLH3_14:75048299_A>G_3	AAAATGACAGAGCCATCTT	MLH3_c.1357A>G_p.M453V
MLH3_14:75048299_A>G_2	AAATGACAGAGCCATCTTT	MLH3_c.1357A>G_p.M453V
MED13L_12:115963462_A>G_6	GCCAGGAATTCTCAGCGGG	MED13L_c.6445A>G_p.N2149D
MED13L_12:115963462_A>G_5	CCAGGAATTCTCAGCGGGT	MED13L_c.6445A>G_p.N2149D
MED13L_12:115963462_A>G_4	CAGGAATTCTCAGCGGGTT	MED13L_c.6445A>G_p.N2149D
MED13L_12:115963462_A>G_3	AGGAATTCTCAGCGGGTTC	MED13L_c.6445A>G_p.N2149D
MED13L_12:115963462_A>G_2	GGAATTCTCAGCGGGTTCC	MED13L_c.6445A>G_p.N2149D
MBP_18:77017200_A>G_6	AAGCGCACAGCGGACCCGA	MBP_c.208A>G_p.T70A
MBP_18:77017200_A>G_5	AGCGCACAGCGGACCCGAA	MBP_c.208A>G_p.T70A
MBP_18:77017200_A>G_4	GCGCACAGCGGACCCGAAG	MBP_c.208A>G_p.T70A
MBP_18:77017200_A>G_3	CGCACAGCGGACCCGAAGA	MBP_c.208A>G_p.T70A
MBP_18:77017200_A>G_2	GCACAGCGGACCCGAAGAA	MBP_c.208A>G_p.T70A
MAVS_20:3854650_A>G_6	AGACCTATAAGTATATCTG	MAVS_c.26A>G_p.Y9C
MAVS_20:3854650_A>G_5	GACCTATAAGTATATCTGC	MAVS_c.26A>G_p.Y9C
MAVS_20:3854650_A>G_4	ACCTATAAGTATATCTGCC	MAVS_c.26A>G_p.Y9C
MAVS_20:3854650_A>G_3	CCTATAAGTATATCTGCCG	MAVS_c.26A>G_p.Y9C
MAVS_20:3854650_A>G_2	CTATAAGTATATCTGCCGC	MAVS_c.26A>G_p.Y9C
MARK3_14:103451971_T>C_6	TTGCATATTCCATGATTAG	MARK3_c.400T>C_p.Y134H
MARK3_14:103451971_T>C_5	TGCATATTCCATGATTAGG	MARK3_c.400T>C_p.Y134H
MARK3_14:103451971_T>C_4	GCATATTCCATGATTAGGT	MARK3_c.400T>C_p.Y134H
MARK3_14:103451971_T>C_3	CATATTCCATGATTAGGTA	MARK3_c.400T>C_p.Y134H
MARK3_14:103451971_T>C_2	ATATTCCATGATTAGGTAG	MARK3_c.400T>C_p.Y134H
MAPKBP1_15:41816952_A>G_6	TGATCCATGTGCTGGATGC	MAPKBP1_c.1646A>G_p.H549R
MAPKBP1_15:41816952_A>G_5	GATCCATGTGCTGGATGCC	MAPKBP1_c.1646A>G_p.H549R
MAPKBP1_15:41816952_A>G_4	ATCCATGTGCTGGATGCCG	MAPKBP1_c.1646A>G_p.H549R
MAPKBP1_15:41816952_A>G_3	TCCATGTGCTGGATGCCGG	MAPKBP1_c.1646A>G_p.H549R
MAPKBP1_15:41816952_A>G_2	CCATGTGCTGGATGCCGGG	MAPKBP1_c.1646A>G_p.H549R
MAP3K19_2:134987175_A>G_6	TGCATAAAACCAGCATAAA	MAP3K19_c.1697A>G_p.K566R
MAP3K19_2:134987175_A>G_5	GCATAAAACCAGCATAAAA	MAP3K19_c.1697A>G_p.K566R
MAP3K19_2:134987175_A>G_4	CATAAAACCAGCATAAAAA	MAP3K19_c.1697A>G_p.K566R
MAP3K19_2:134987175_A>G_3	ATAAAACCAGCATAAAAAC	MAP3K19_c.1697A>G_p.K566R
MAP3K19_2:134987175_A>G_2	TAAAACCAGCATAAAAACA	MAP3K19_c.1697A>G_p.K566R
MAP2K6_17:69519400_A>G_6	CCATTCACTGTCACCTTTT	MAP2K6_c.334A>G_p.T112A
MAP2K6_17:69519400_A>G_5	CATTCACTGTCACCTTTTA	MAP2K6_c.334A>G_p.T112A
MAP2K6_17:69519400_A>G_4	ATTCACTGTCACCTTTTAT	MAP2K6_c.334A>G_p.T112A
MAP2K6_17:69519400_A>G_3	TTCACTGTCACCTTTTATG	MAP2K6_c.334A>G_p.T112A
MAP2K6_17:69519400_A>G_2	TCACTGTCACCTTTTATGG	MAP2K6_c.334A>G_p.T112A
MAMDC2_9:70225757_T>C_6	GCTTCAAAAATTATCTGAA	MAMDC2_c.1919T>C_p.F640S
MAMDC2_9:70225757_T>C_5	CTTCAAAAATTATCTGAAA	MAMDC2_c.1919T>C_p.F640S
MAMDC2_9:70225757_T>C_4	TTCAAAAATTATCTGAAAG	MAMDC2_c.1919T>C_p.F640S
MAMDC2_9:70225757_T>C_3	TCAAAAATTATCTGAAAGA	MAMDC2_c.1919T>C_p.F640S
MAMDC2_9:70225757_T>C_2	CAAAAATTATCTGAAAGAA	MAMDC2_c.1919T>C_p.F640S
MAGEB2_X:30219146_A>G_6	CTGATGAGGAATCCCTGCT	MAGEB2_c.566A>G_p.E189G
MAGEB2_X:30219146_A>G_5	TGATGAGGAATCCCTGCTC	MAGEB2_c.566A>G_p.E189G
MAGEB2_X:30219146_A>G_4	GATGAGGAATCCCTGCTCA	MAGEB2_c.566A>G_p.E189G
MAGEB2_X:30219146_A>G_3	ATGAGGAATCCCTGCTCAG	MAGEB2_c.566A>G_p.E189G
MAGEB2_X:30219146_A>G_2	TGAGGAATCCCTGCTCAGT	MAGEB2_c.566A>G_p.E189G
MAGEA3_X:152701773_A>G_6	GGGAAGAGTGAGTCTGAGC	MAGEA3_c.941A>G_p.E314G
MAGEA3_X:152701773_A>G_5	GGAAGAGTGAGTCTGAGCA	MAGEA3_c.941A>G_p.E314G
MAGEA3_X:152701773_A>G_4	GAAGAGTGAGTCTGAGCAC	MAGEA3_c.941A>G_p.E314G
MAGEA3_X:152701773_A>G_3	AAGAGTGAGTCTGAGCACG	MAGEA3_c.941A>G_p.E314G
MAGEA3_X:152701773_A>G_2	AGAGTGAGTCTGAGCACGA	MAGEA3_c.941A>G_p.E314G
MACF1_1:39333274_T>C_6	TTTAACATTTCCTTTTTGT	MACF1_c.2006T>C_p.M669T
MACF1_1:39333274_T>C_5	TTAACATTTCCTTTTTGTC	MACF1_c.2006T>C_p.M669T
MACF1_1:39333274_T>C_4	TAACATTTCCTTTTTGTCC	MACF1_c.2006T>C_p.M669T
MACF1_1:39333274_T>C_3	AACATTTCCTTTTTGTCCA	MACF1_c.2006T>C_p.M669T
MACF1_1:39333274_T>C_2	ACATTTCCTTTTTGTCCAG	MACF1_c.2006T>C_p.M669T
LYST_1:235709200_T>C_6	GACTCTAGAGCCTGCCGAT	LYST_c.10034T>C_p.L3345P
LYST_1:235709200_T>C_5	ACTCTAGAGCCTGCCGATG	LYST_c.10034T>C_p.L3345P
LYST_1:235709200_T>C_4	CTCTAGAGCCTGCCGATGG	LYST_c.10034T>C_p.L3345P
LYST_1:235709200_T>C_3	TCTAGAGCCTGCCGATGGA	LYST_c.10034T>C_p.L3345P
LYST_1:235709200_T>C_2	CTAGAGCCTGCCGATGGAT	LYST_c.10034T>C_p.L3345P
LRRTM2_5:138873392_A>G_6	CAAGTTACCATGTGGGAGA	LRRTM2_c.1169A>G_p.Y390C
LRRTM2_5:138873392_A>G_5	AAGTTACCATGTGGGAGAC	LRRTM2_c.1169A>G_p.Y390C
LRRTM2_5:138873392_A>G_4	AGTTACCATGTGGGAGACA	LRRTM2_c.1169A>G_p.Y390C
LRRTM2_5:138873392_A>G_3	GTTACCATGTGGGAGACAA	LRRTM2_c.1169A>G_p.Y390C
LRRTM2_5:138873392_A>G_2	TTACCATGTGGGAGACAAA	LRRTM2_c.1169A>G_p.Y390C
LRRC75A_17:16443909_T>C_6	GTTGCCATTGAGTGCCAGT	LRRC75A_c.598T>C_p.W200R
LRRC75A_17:16443909_T>C_5	TTGCCATTGAGTGCCAGTG	LRRC75A_c.598T>C_p.W200R
LRRC75A_17:16443909_T>C_4	TGCCATTGAGTGCCAGTGT	LRRC75A_c.598T>C_p.W200R
LRRC75A_17:16443909_T>C_3	GCCATTGAGTGCCAGTGTG	LRRC75A_c.598T>C_p.W200R
LRRC75A_17:16443909_T>C_2	CCATTGAGTGCCAGTGTGG	LRRC75A_c.598T>C_p.W200R
LRRC4_7:128030132_T>C_6	GAGGGCACCCGGTTGAAGG	LRRC4_c.509T>C_p.V170A
LRRC4_7:128030132_T>C_5	AGGGCACCCGGTTGAAGGC	LRRC4_c.509T>C_p.V170A
LRRC4_7:128030132_T>C_4	GGGCACCCGGTTGAAGGCG	LRRC4_c.509T>C_p.V170A
LRRC4_7:128030132_T>C_3	GGCACCCGGTTGAAGGCGT	LRRC4_c.509T>C_p.V170A
LRRC4_7:128030132_T>C_2	GCACCCGGTTGAAGGCGTA	LRRC4_c.509T>C_p.V170A
LRP6_12:12150837_A>G_6	GCAGCCAGGTAATTGAGAG	LRP6_c.2993A>G_p.Q998R
LRP6_12:12150837_A>G_5	CAGCCAGGTAATTGAGAGC	LRP6_c.2993A>G_p.Q998R
LRP6_12:12150837_A>G_4	AGCCAGGTAATTGAGAGCT	LRP6_c.2993A>G_p.Q998R
LRP6_12:12150837_A>G_3	GCCAGGTAATTGAGAGCTT	LRP6_c.2993A>G_p.Q998R
LRP6_12:12150837_A>G_2	CCAGGTAATTGAGAGCTTG	LRP6_c.2993A>G_p.Q998R
LONRF3_X:118986949_T>C_6	GGACTGATGGTGAAAAGAA	LONRF3_c.160T>C_p.S54P
LONRF3_X:118986949_T>C_5	GACTGATGGTGAAAAGAAA	LONRF3_c.160T>C_p.S54P
LONRF3_X:118986949_T>C_4	ACTGATGGTGAAAAGAAAC	LONRF3_c.160T>C_p.S54P
LONRF3_X:118986949_T>C_3	CTGATGGTGAAAAGAAACT	LONRF3_c.160T>C_p.S54P
LONRF3_X:118986949_T>C_2	TGATGGTGAAAAGAAACTA	LONRF3_c.160T>C_p.S54P
LMO7_13:75621805_T>C_6	GAGCACATATCAGTTGCCT	LMO7_c.112T>C_p.C38R
LMO7_13:75621805_T>C_5	AGCACATATCAGTTGCCTC	LMO7_c.112T>C_p.C38R
LMO7_13:75621805_T>C_4	GCACATATCAGTTGCCTCC	LMO7_c.112T>C_p.C38R
LMO7_13:75621805_T>C_3	CACATATCAGTTGCCTCCA	LMO7_c.112T>C_p.C38R
LMO7_13:75621805_T>C_2	ACATATCAGTTGCCTCCAA	LMO7_c.112T>C_p.C38R
LILRA2_19:54574988_T>C_6	ACACATAGGGAGAGTTCGA	LILRA2_c.610T>C_p.Y204H
LILRA2_19:54574988_T>C_5	CACATAGGGAGAGTTCGAG	LILRA2_c.610T>C_p.Y204H
LILRA2_19:54574988_T>C_4	ACATAGGGAGAGTTCGAGT	LILRA2_c.610T>C_p.Y204H
LILRA2_19:54574988_T>C_3	CATAGGGAGAGTTCGAGTC	LILRA2_c.610T>C_p.Y204H
LILRA2_19:54574988_T>C_2	ATAGGGAGAGTTCGAGTCA	LILRA2_c.610T>C_p.Y204H
LEO1_15:51953198_A>G_6	ACCACAATCATCTTTTTAT	LEO1_c.1406A>G_p.N469S
LEO1_15:51953198_A>G_5	CCACAATCATCTTTTTATA	LEO1_c.1406A>G_p.N469S
LEO1_15:51953198_A>G_4	CACAATCATCTTTTTATAA	LEO1_c.1406A>G_p.N469S
LEO1_15:51953198_A>G_3	ACAATCATCTTTTTATAAG	LEO1_c.1406A>G_p.N469S
LEO1_15:51953198_A>G_2	CAATCATCTTTTTATAAGA	LEO1_c.1406A>G_p.N469S
LENG9_19:54462586_T>C_6	TTGGTCACTTCTGCTTGTA	LENG9_c.941T>C_p.V314A
LENG9_19:54462586_T>C_5	TGGTCACTTCTGCTTGTAG	LENG9_c.941T>C_p.V314A
LENG9_19:54462586_T>C_4	GGTCACTTCTGCTTGTAGC	LENG9_c.941T>C_p.V314A
LENG9_19:54462586_T>C_3	GTCACTTCTGCTTGTAGCC	LENG9_c.941T>C_p.V314A
LENG9_19:54462586_T>C_2	TCACTTCTGCTTGTAGCCC	LENG9_c.941T>C_p.V314A
LDB2_4:16595857_T>C_6	CGGGGGATGAGGGTCCTGC	LDB2_c.254T>C_p.I85T
LDB2_4:16595857_T>C_5	GGGGGATGAGGGTCCTGCC	LDB2_c.254T>C_p.I85T
LDB2_4:16595857_T>C_4	GGGGATGAGGGTCCTGCCG	LDB2_c.254T>C_p.I85T
LDB2_4:16595857_T>C_3	GGGATGAGGGTCCTGCCGA	LDB2_c.254T>C_p.I85T
LDB2_4:16595857_T>C_2	GGATGAGGGTCCTGCCGAT	LDB2_c.254T>C_p.I85T
LARS_5:146142923_A>G_6	TTCCAAATCATCTTTCATA	LARS_c.2039A>G_p.N680S
LARS_5:146142923_A>G_5	TCCAAATCATCTTTCATAT	LARS_c.2039A>G_p.N680S
LARS_5:146142923_A>G_4	CCAAATCATCTTTCATATT	LARS_c.2039A>G_p.N680S
LARS_5:146142923_A>G_3	CAAATCATCTTTCATATTA	LARS_c.2039A>G_p.N680S
LARS_5:146142923_A>G_2	AAATCATCTTTCATATTAC	LARS_c.2039A>G_p.N680S
LAMB1_7:107986051_T>C_6	TCTTCTATTTTGAAAGCAG	LAMB1_c.647T>C_p.I216T
LAMB1_7:107986051_T>C_5	CTTCTATTTTGAAAGCAGG	LAMB1_c.647T>C_p.I216T
LAMB1_7:107986051_T>C_4	TTCTATTTTGAAAGCAGGA	LAMB1_c.647T>C_p.I216T
LAMB1_7:107986051_T>C_3	TCTATTTTGAAAGCAGGAT	LAMB1_c.647T>C_p.I216T
LAMB1_7:107986051_T>C_2	CTATTTTGAAAGCAGGATC	LAMB1_c.647T>C_p.I216T
LAMA2_6:129492326_T>C_6	CTTGCAAAGTCCATGGGGC	LAMA2_c.8087T>C_p.F2696S
LAMA2_6:129492326_T>C_5	TTGCAAAGTCCATGGGGCT	LAMA2_c.8087T>C_p.F2696S
LAMA2_6:129492326_T>C_4	TGCAAAGTCCATGGGGCTA	LAMA2_c.8087T>C_p.F2696S
LAMA2_6:129492326_T>C_3	GCAAAGTCCATGGGGCTAA	LAMA2_c.8087T>C_p.F2696S
LAMA2_6:129492326_T>C_2	CAAAGTCCATGGGGCTAAT	LAMA2_c.8087T>C_p.F2696S
KRT71_12:52548775_A>G_6	TACGCCAATAAGGTGGAAC	KRT71_c.739A>G_p.N247D
KRT71_12:52548775_A>G_5	ACGCCAATAAGGTGGAACT	KRT71_c.739A>G_p.N247D
KRT71_12:52548775_A>G_4	CGCCAATAAGGTGGAACTG	KRT71_c.739A>G_p.N247D
KRT71_12:52548775_A>G_3	GCCAATAAGGTGGAACTGC	KRT71_c.739A>G_p.N247D
KRT71_12:52548775_A>G_2	CCAATAAGGTGGAACTGCA	KRT71_c.739A>G_p.N247D
KRT6A_12:52488072_A>G_6	GTCAACATCTGTAAGTACC	KRT6A_c.1456A>G_p.I486V
KRT6A_12:52488072_A>G_5	TCAACATCTGTAAGTACCT	KRT6A_c.1456A>G_p.I486V
KRT6A_12:52488072_A>G_4	CAACATCTGTAAGTACCTT	KRT6A_c.1456A>G_p.I486V
KRT6A_12:52488072_A>G_3	AACATCTGTAAGTACCTTT	KRT6A_c.1456A>G_p.I486V
KRT6A_12:52488072_A>G_2	ACATCTGTAAGTACCTTTG	KRT6A_c.1456A>G_p.I486V
KRT26_17:40770101_A>G_6	CAATATACAGCTGGGGGGA	KRT26_c.703A>G_p.T235A
KRT26_17:40770101_A>G_5	AATATACAGCTGGGGGGAA	KRT26_c.703A>G_p.T235A
KRT26_17:40770101_A>G_4	ATATACAGCTGGGGGGAAC	KRT26_c.703A>G_p.T235A
KRT26_17:40770101_A>G_3	TATACAGCTGGGGGGAACG	KRT26_c.703A>G_p.T235A
KRT26_17:40770101_A>G_2	ATACAGCTGGGGGGAACGT	KRT26_c.703A>G_p.T235A
KRAS_12:25227342_A>G_6	CAGGTCAAGAGGAGTACAG	KRAS_c.182A>G_p.Q61R
KRAS_12:25227342_A>G_5	AGGTCAAGAGGAGTACAGT	KRAS_c.182A>G_p.Q61R
KRAS_12:25227342_A>G_4	GGTCAAGAGGAGTACAGTG	KRAS_c.182A>G_p.Q61R
KRAS_12:25227342_A>G_3	GTCAAGAGGAGTACAGTGC	KRAS_c.182A>G_p.Q61R
KRAS_12:25227342_A>G_2	TCAAGAGGAGTACAGTGCA	KRAS_c.182A>G_p.Q61R
KNG1_3:186725143_A>G_6	TCCTATATCAACGCAGAGC	KNG1_c.447A>G_p.I149M
KNG1_3:186725143_A>G_5	CCTATATCAACGCAGAGCC	KNG1_c.447A>G_p.I149M
KNG1_3:186725143_A>G_4	CTATATCAACGCAGAGCCC	KNG1_c.447A>G_p.I149M
KNG1_3:186725143_A>G_3	TATATCAACGCAGAGCCCA	KNG1_c.447A>G_p.I149M
KNG1_3:186725143_A>G_2	ATATCAACGCAGAGCCCAG	KNG1_c.447A>G_p.I149M
KMT2A_11:118478164_A>G_6	AAGCCCAAGTTTGGTGGTC	KMT2A_c.3532A>G_p.K1178E
KMT2A_11:118478164_A>G_5	AGCCCAAGTTTGGTGGTCG	KMT2A_c.3532A>G_p.K1178E
KMT2A_11:118478164_A>G_4	GCCCAAGTTTGGTGGTCGC	KMT2A_c.3532A>G_p.K1178E
KMT2A_11:118478164_A>G_3	CCCAAGTTTGGTGGTCGCA	KMT2A_c.3532A>G_p.K1178E
KMT2A_11:118478164_A>G_2	CCAAGTTTGGTGGTCGCAA	KMT2A_c.3532A>G_p.K1178E
KMT2A_11:118474039_A>G_6	CAAAATACTTATAAAGAAA	KMT2A_c.2880A>G_p.I960M
KMT2A_11:118474039_A>G_5	AAAATACTTATAAAGAAAG	KMT2A_c.2880A>G_p.I960M
KMT2A_11:118474039_A>G_4	AAATACTTATAAAGAAAGG	KMT2A_c.2880A>G_p.I960M
KMT2A_11:118474039_A>G_3	AATACTTATAAAGAAAGGG	KMT2A_c.2880A>G_p.I960M
KMT2A_11:118474039_A>G_2	ATACTTATAAAGAAAGGGA	KMT2A_c.2880A>G_p.I960M
KLHL29_2:23562398_A>G_6	CCGGCTACAGCTCCTGCTC	KLHL29_c.202A>G_p.T68A
KLHL29_2:23562398_A>G_5	CGGCTACAGCTCCTGCTCC	KLHL29_c.202A>G_p.T68A
KLHL29_2:23562398_A>G_4	GGCTACAGCTCCTGCTCCC	KLHL29_c.202A>G_p.T68A
KLHL29_2:23562398_A>G_3	GCTACAGCTCCTGCTCCCT	KLHL29_c.202A>G_p.T68A
KLHL29_2:23562398_A>G_2	CTACAGCTCCTGCTCCCTG	KLHL29_c.202A>G_p.T68A
KLHL10_17:41845735_T>C_6	TCCCATAAAGTGTTGTGGC	KLHL10_c.1294T>C_p.Y432H
KLHL10_17:41845735_T>C_5	CCCATAAAGTGTTGTGGCG	KLHL10_c.1294T>C_p.Y432H
KLHL10_17:41845735_T>C_4	CCATAAAGTGTTGTGGCGC	KLHL10_c.1294T>C_p.Y432H
KLHL10_17:41845735_T>C_3	CATAAAGTGTTGTGGCGCT	KLHL10_c.1294T>C_p.Y432H
KLHL10_17:41845735_T>C_2	ATAAAGTGTTGTGGCGCTT	KLHL10_c.1294T>C_p.Y432H
KIT_4:54723676_T>C_6	GACAAAAATACCAATCTAT	KIT_c.1324T>C_p.F442L
KIT_4:54723676_T>C_5	ACAAAAATACCAATCTATT	KIT_c.1324T>C_p.F442L
KIT_4:54723676_T>C_4	CAAAAATACCAATCTATTG	KIT_c.1324T>C_p.F442L
KIT_4:54723676_T>C_3	AAAAATACCAATCTATTGT	KIT_c.1324T>C_p.F442L
KIT_4:54723676_T>C_2	AAAATACCAATCTATTGTG	KIT_c.1324T>C_p.F442L
KIF19_17:74352924_A>G_6	TGCAGAACAGCGCCCTCCC	KIF19_c.2084A>G_p.N695S
KIF19_17:74352924_A>G_5	GCAGAACAGCGCCCTCCCT	KIF19_c.2084A>G_p.N695S
KIF19_17:74352924_A>G_4	CAGAACAGCGCCCTCCCTC	KIF19_c.2084A>G_p.N695S
KIF19_17:74352924_A>G_3	AGAACAGCGCCCTCCCTCC	KIF19_c.2084A>G_p.N695S
KIF19_17:74352924_A>G_2	GAACAGCGCCCTCCCTCCC	KIF19_c.2084A>G_p.N695S
KIF19_17:74343071_A>G_6	CCTGGCATCTATGTTCAGA	KIF19_c.367A>G_p.I123V
KIF19_17:74343071_A>G_5	CTGGCATCTATGTTCAGAC	KIF19_c.367A>G_p.I123V
KIF19_17:74343071_A>G_4	TGGCATCTATGTTCAGACC	KIF19_c.367A>G_p.I123V
KIF19_17:74343071_A>G_3	GGCATCTATGTTCAGACCC	KIF19_c.367A>G_p.I123V
KIF19_17:74343071_A>G_2	GCATCTATGTTCAGACCCT	KIF19_c.367A>G_p.I123V
KIAA1217_10:24542979_A>G_6	TATAAAACTGAGATCATAA	KIAA1217_c.3709A>G_p.T1237A
KIAA1217_10:24542979_A>G_5	ATAAAACTGAGATCATAAT	KIAA1217_c.3709A>G_p.T1237A
KIAA1217_10:24542979_A>G_4	TAAAACTGAGATCATAATG	KIAA1217_c.3709A>G_p.T1237A
KIAA1217_10:24542979_A>G_3	AAAACTGAGATCATAATGA	KIAA1217_c.3709A>G_p.T1237A
KIAA1217_10:24542979_A>G_2	AAACTGAGATCATAATGAA	KIAA1217_c.3709A>G_p.T1237A
KIAA0753_17:6579814_T>C_6	TCCTGAAGTTCAGCAGCCA	KIAA0753_c.2837T>C_p.L946P
KIAA0753_17:6579814_T>C_5	CCTGAAGTTCAGCAGCCAC	KIAA0753_c.2837T>C_p.L946P
KIAA0753_17:6579814_T>C_4	CTGAAGTTCAGCAGCCACA	KIAA0753_c.2837T>C_p.L946P
KIAA0753_17:6579814_T>C_3	TGAAGTTCAGCAGCCACAG	KIAA0753_c.2837T>C_p.L946P
KIAA0753_17:6579814_T>C_2	GAAGTTCAGCAGCCACAGC	KIAA0753_c.2837T>C_p.L946P
KIAA0040_1:175160797_A>G_6	AAGAAGAAGAAGAAGGATG	KIAA0040_c.217A>G_p.K73E
KIAA0040_1:175160797_A>G_5	AGAAGAAGAAGAAGGATGA	KIAA0040_c.217A>G_p.K73E
KIAA0040_1:175160797_A>G_4	GAAGAAGAAGAAGGATGAA	KIAA0040_c.217A>G_p.K73E
KIAA0040_1:175160797_A>G_3	AAGAAGAAGAAGGATGAAG	KIAA0040_c.217A>G_p.K73E
KIAA0040_1:175160797_A>G_2	AGAAGAAGAAGGATGAAGA	KIAA0040_c.217A>G_p.K73E
KEAP1_19:10499835_A>G_6	GGCATCATGAACGAGCTGC	KEAP1_c.199A>G_p.M67V
KEAP1_19:10499835_A>G_5	GCATCATGAACGAGCTGCG	KEAP1_c.199A>G_p.M67V
KEAP1_19:10499835_A>G_4	CATCATGAACGAGCTGCGG	KEAP1_c.199A>G_p.M67V
KEAP1_19:10499835_A>G_3	ATCATGAACGAGCTGCGGC	KEAP1_c.199A>G_p.M67V
KEAP1_19:10499835_A>G_2	TCATGAACGAGCTGCGGCT	KEAP1_c.199A>G_p.M67V
KEAP1_19:10499610_A>G_6	GCCTACACGGCCTCCATCT	KEAP1_c.424A>G_p.T142A
KEAP1_19:10499610_A>G_5	CCTACACGGCCTCCATCTC	KEAP1_c.424A>G_p.T142A
KEAP1_19:10499610_A>G_4	CTACACGGCCTCCATCTCC	KEAP1_c.424A>G_p.T142A
KEAP1_19:10499610_A>G_3	TACACGGCCTCCATCTCCA	KEAP1_c.424A>G_p.T142A
KEAP1_19:10499610_A>G_2	ACACGGCCTCCATCTCCAT	KEAP1_c.424A>G_p.T142A
KEAP1_19:10489851_A>G_6	GCAGGTATGAGCCAGAGCG	KEAP1_c.1328A>G_p.Y443C
KEAP1_19:10489851_A>G_5	CAGGTATGAGCCAGAGCGG	KEAP1_c.1328A>G_p.Y443C
KEAP1_19:10489851_A>G_4	AGGTATGAGCCAGAGCGGG	KEAP1_c.1328A>G_p.Y443C
KEAP1_19:10489851_A>G_3	GGTATGAGCCAGAGCGGGA	KEAP1_c.1328A>G_p.Y443C
KEAP1_19:10489851_A>G_2	GTATGAGCCAGAGCGGGAT	KEAP1_c.1328A>G_p.Y443C
KDR_4:55106779_T>C_6	CTTCACAAGGGTATGGGTT	KDR_c.1444T>C_p.C482R
KDR_4:55106779_T>C_5	TTCACAAGGGTATGGGTTT	KDR_c.1444T>C_p.C482R
KDR_4:55106779_T>C_4	TCACAAGGGTATGGGTTTG	KDR_c.1444T>C_p.C482R
KDR_4:55106779_T>C_3	CACAAGGGTATGGGTTTGT	KDR_c.1444T>C_p.C482R
KDR_4:55106779_T>C_2	ACAAGGGTATGGGTTTGTC	KDR_c.1444T>C_p.C482R
KCNC1_11:17772155_T>C_6	ACGCCCAAGGCCAGGAAGA	KCNC1_c.1061T>C_p.L354S
KCNC1_11:17772155_T>C_5	CGCCCAAGGCCAGGAAGAT	KCNC1_c.1061T>C_p.L354S
KCNC1_11:17772155_T>C_4	GCCCAAGGCCAGGAAGATG	KCNC1_c.1061T>C_p.L354S
KCNC1_11:17772155_T>C_3	CCCAAGGCCAGGAAGATGA	KCNC1_c.1061T>C_p.L354S
KCNC1_11:17772155_T>C_2	CCAAGGCCAGGAAGATGAT	KCNC1_c.1061T>C_p.L354S
KAT2A_17:42114555_A>G_6	AGGTCTACCCGGGGCTCAG	KAT2A_c.2069A>G_p.Y690C
KAT2A_17:42114555_A>G_5	GGTCTACCCGGGGCTCAGC	KAT2A_c.2069A>G_p.Y690C
KAT2A_17:42114555_A>G_4	GTCTACCCGGGGCTCAGCT	KAT2A_c.2069A>G_p.Y690C
KAT2A_17:42114555_A>G_3	TCTACCCGGGGCTCAGCTG	KAT2A_c.2069A>G_p.Y690C
KAT2A_17:42114555_A>G_2	CTACCCGGGGCTCAGCTGC	KAT2A_c.2069A>G_p.Y690C
JAKMIP1_4:6064956_A>G_6	ACTCAGAAACGTTGTCCGA	JAKMIP1_c.1355A>G_p.E452G
JAKMIP1_4:6064956_A>G_5	CTCAGAAACGTTGTCCGAA	JAKMIP1_c.1355A>G_p.E452G
JAKMIP1_4:6064956_A>G_4	TCAGAAACGTTGTCCGAAA	JAKMIP1_c.1355A>G_p.E452G
JAKMIP1_4:6064956_A>G_3	CAGAAACGTTGTCCGAAAC	JAKMIP1_c.1355A>G_p.E452G
JAKMIP1_4:6064956_A>G_2	AGAAACGTTGTCCGAAACA	JAKMIP1_c.1355A>G_p.E452G
JAK2_9:5050714_T>C_6	ACTTTTATCCATCCGTGCA	JAK2_c.497T>C_p.I166T
JAK2_9:5050714_T>C_5	CTTTTATCCATCCGTGCAC	JAK2_c.497T>C_p.I166T
JAK2_9:5050714_T>C_4	TTTTATCCATCCGTGCACA	JAK2_c.497T>C_p.I166T
JAK2_9:5050714_T>C_3	TTTATCCATCCGTGCACAA	JAK2_c.497T>C_p.I166T
JAK2_9:5050714_T>C_2	TTATCCATCCGTGCACAAA	JAK2_c.497T>C_p.I166T
JAK1_1:64869359_A>G_6	CACACTATGCCATGATGAA	JAK1_c.599A>G_p.Y200C
JAK1_1:64869359_A>G_5	ACACTATGCCATGATGAAG	JAK1_c.599A>G_p.Y200C
JAK1_1:64869359_A>G_4	CACTATGCCATGATGAAGA	JAK1_c.599A>G_p.Y200C
JAK1_1:64869359_A>G_3	ACTATGCCATGATGAAGAA	JAK1_c.599A>G_p.Y200C
JAK1_1:64869359_A>G_2	CTATGCCATGATGAAGAAG	JAK1_c.599A>G_p.Y200C
JAK1_1:64839716_T>C_6	GGCTTCAGAGATTTAACAG	JAK1_c.2729T>C_p.L910P
JAK1_1:64839716_T>C_5	GCTTCAGAGATTTAACAGC	JAK1_c.2729T>C_p.L910P
JAK1_1:64839716_T>C_4	CTTCAGAGATTTAACAGCC	JAK1_c.2729T>C_p.L910P
JAK1_1:64839716_T>C_3	TTCAGAGATTTAACAGCCA	JAK1_c.2729T>C_p.L910P
JAK1_1:64839716_T>C_2	TCAGAGATTTAACAGCCAC	JAK1_c.2729T>C_p.L910P
ITGAX_16:31372472_T>C_6	GCCAGCATAGGCCGCAGGT	ITGAX_c.2255T>C_p.M752T
ITGAX_16:31372472_T>C_5	CCAGCATAGGCCGCAGGTT	ITGAX_c.2255T>C_p.M752T
ITGAX_16:31372472_T>C_4	CAGCATAGGCCGCAGGTTT	ITGAX_c.2255T>C_p.M752T
ITGAX_16:31372472_T>C_3	AGCATAGGCCGCAGGTTTC	ITGAX_c.2255T>C_p.M752T
ITGAX_16:31372472_T>C_2	GCATAGGCCGCAGGTTTCT	ITGAX_c.2255T>C_p.M752T
ISOC1_5:129105239_A>G_6	TACCCTAAAGGTCTTGGGA	ISOC1_c.484A>G_p.K162E
ISOC1_5:129105239_A>G_5	ACCCTAAAGGTCTTGGGAG	ISOC1_c.484A>G_p.K162E
ISOC1_5:129105239_A>G_4	CCCTAAAGGTCTTGGGAGC	ISOC1_c.484A>G_p.K162E
ISOC1_5:129105239_A>G_3	CCTAAAGGTCTTGGGAGCA	ISOC1_c.484A>G_p.K162E
ISOC1_5:129105239_A>G_2	CTAAAGGTCTTGGGAGCAC	ISOC1_c.484A>G_p.K162E
HSPG2_1:21831768_A>G_6	GCCACCATCCGCCATCCCA	HSPG2_c.11236A>G_p.I3746V
HSPG2_1:21831768_A>G_5	CCACCATCCGCCATCCCAC	HSPG2_c.11236A>G_p.I3746V
HSPG2_1:21831768_A>G_4	CACCATCCGCCATCCCACA	HSPG2_c.11236A>G_p.I3746V
HSPG2_1:21831768_A>G_3	ACCATCCGCCATCCCACAC	HSPG2_c.11236A>G_p.I3746V
HSPG2_1:21831768_A>G_2	CCATCCGCCATCCCACACC	HSPG2_c.11236A>G_p.I3746V
HSD17B4_5:119493940_A>G_6	CAGAGTATCCAAGGTAAAG	HSD17B4_c.937A>G_p.I313V
HSD17B4_5:119493940_A>G_5	AGAGTATCCAAGGTAAAGA	HSD17B4_c.937A>G_p.I313V
HSD17B4_5:119493940_A>G_4	GAGTATCCAAGGTAAAGAG	HSD17B4_c.937A>G_p.I313V
HSD17B4_5:119493940_A>G_3	AGTATCCAAGGTAAAGAGA	HSD17B4_c.937A>G_p.I313V
HSD17B4_5:119493940_A>G_2	GTATCCAAGGTAAAGAGAG	HSD17B4_c.937A>G_p.I313V
HPD_12:121847089_A>G_6	CCATCAATGAGCCAGCGCC	HPD_c.722A>G_p.N241S
HPD_12:121847089_A>G_5	CATCAATGAGCCAGCGCCT	HPD_c.722A>G_p.N241S
HPD_12:121847089_A>G_4	ATCAATGAGCCAGCGCCTG	HPD_c.722A>G_p.N241S
HPD_12:121847089_A>G_3	TCAATGAGCCAGCGCCTGG	HPD_c.722A>G_p.N241S
HPD_12:121847089_A>G_2	CAATGAGCCAGCGCCTGGC	HPD_c.722A>G_p.N241S
HOXA1_7:27094484_T>C_6	CCGGGGAAGGAACGCAGGG	HOXA1_c.964T>C_p.S322P
HOXA1_7:27094484_T>C_5	CGGGGAAGGAACGCAGGGC	HOXA1_c.964T>C_p.S322P
HOXA1_7:27094484_T>C_4	GGGGAAGGAACGCAGGGCG	HOXA1_c.964T>C_p.S322P
HOXA1_7:27094484_T>C_3	GGGAAGGAACGCAGGGCGA	HOXA1_c.964T>C_p.S322P
HOXA1_7:27094484_T>C_2	GGAAGGAACGCAGGGCGAA	HOXA1_c.964T>C_p.S322P
HNRNPM_19:8466341_T>C_6	GTGCCTATTCCACGACTTT	HNRNPM_c.737T>C_p.I246T
HNRNPM_19:8466341_T>C_5	TGCCTATTCCACGACTTTT	HNRNPM_c.737T>C_p.I246T
HNRNPM_19:8466341_T>C_4	GCCTATTCCACGACTTTTT	HNRNPM_c.737T>C_p.I246T
HNRNPM_19:8466341_T>C_3	CCTATTCCACGACTTTTTC	HNRNPM_c.737T>C_p.I246T
HNRNPM_19:8466341_T>C_2	CTATTCCACGACTTTTTCC	HNRNPM_c.737T>C_p.I246T
HMGCS2_1:119764193_A>G_6	AACTGGATGGAGTCCAGTT	HMGCS2_c.538A>G_p.M180V
HMGCS2_1:119764193_A>G_5	ACTGGATGGAGTCCAGTTC	HMGCS2_c.538A>G_p.M180V
HMGCS2_1:119764193_A>G_4	CTGGATGGAGTCCAGTTCC	HMGCS2_c.538A>G_p.M180V
HMGCS2_1:119764193_A>G_3	TGGATGGAGTCCAGTTCCT	HMGCS2_c.538A>G_p.M180V
HMGCS2_1:119764193_A>G_2	GGATGGAGTCCAGTTCCTG	HMGCS2_c.538A>G_p.M180V
HMGCR_5:75356374_A>G_6	ACAAGTATAGCTGGACGCA	HMGCR_c.1912A>G_p.I638V
HMGCR_5:75356374_A>G_5	CAAGTATAGCTGGACGCAA	HMGCR_c.1912A>G_p.I638V
HMGCR_5:75356374_A>G_4	AAGTATAGCTGGACGCAAC	HMGCR_c.1912A>G_p.I638V
HMGCR_5:75356374_A>G_3	AGTATAGCTGGACGCAACC	HMGCR_c.1912A>G_p.I638V
HMGCR_5:75356374_A>G_2	GTATAGCTGGACGCAACCT	HMGCR_c.1912A>G_p.I638V
HLA-B_6:31356206_A>G_6	CTCCGCAGATACCTGGAGA	HLA-B_c.580A>G_p.R194G
HLA-B_6:31356206_A>G_5	TCCGCAGATACCTGGAGAA	HLA-B_c.580A>G_p.R194G
HLA-B_6:31356206_A>G_4	CCGCAGATACCTGGAGAAC	HLA-B_c.580A>G_p.R194G
HLA-B_6:31356206_A>G_3	CGCAGATACCTGGAGAACG	HLA-B_c.580A>G_p.R194G
HLA-B_6:31356206_A>G_2	GCAGATACCTGGAGAACGG	HLA-B_c.580A>G_p.R194G
HIVEP1_6:12122272_T>C_6	ACAGACAGAAGAAACACTT	HIVEP1_c.2477T>C_p.L826P
HIVEP1_6:12122272_T>C_5	CAGACAGAAGAAACACTTG	HIVEP1_c.2477T>C_p.L826P
HIVEP1_6:12122272_T>C_4	AGACAGAAGAAACACTTGC	HIVEP1_c.2477T>C_p.L826P
HIVEP1_6:12122272_T>C_3	GACAGAAGAAACACTTGCT	HIVEP1_c.2477T>C_p.L826P
HIVEP1_6:12122272_T>C_2	ACAGAAGAAACACTTGCTT	HIVEP1_c.2477T>C_p.L826P
HIST1H2BK_6:27146669_A>G_6	GTGTACAAGGTGCTGAAGC	HIST1H2BK_c.130A>G_p.K44E
HIST1H2BK_6:27146669_A>G_5	TGTACAAGGTGCTGAAGCA	HIST1H2BK_c.130A>G_p.K44E
HIST1H2BK_6:27146669_A>G_4	GTACAAGGTGCTGAAGCAG	HIST1H2BK_c.130A>G_p.K44E
HIST1H2BK_6:27146669_A>G_3	TACAAGGTGCTGAAGCAGG	HIST1H2BK_c.130A>G_p.K44E
HIST1H2BK_6:27146669_A>G_2	ACAAGGTGCTGAAGCAGGT	HIST1H2BK_c.130A>G_p.K44E
HIPK2_7:139716796_A>G_6	TACCTTACGAGCAGACCAT	HIPK2_c.239A>G_p.Y80C
HIPK2_7:139716796_A>G_5	ACCTTACGAGCAGACCATC	HIPK2_c.239A>G_p.Y80C
HIPK2_7:139716796_A>G_4	CCTTACGAGCAGACCATCG	HIPK2_c.239A>G_p.Y80C
HIPK2_7:139716796_A>G_3	CTTACGAGCAGACCATCGT	HIPK2_c.239A>G_p.Y80C
HIPK2_7:139716796_A>G_2	TTACGAGCAGACCATCGTC	HIPK2_c.239A>G_p.Y80C
HEXA_15:72375770_A>G_6	AGCGCTATCGTGACCTGCT	HEXA_c.203A>G_p.Y68C
HEXA_15:72375770_A>G_5	GCGCTATCGTGACCTGCTT	HEXA_c.203A>G_p.Y68C
HEXA_15:72375770_A>G_4	CGCTATCGTGACCTGCTTT	HEXA_c.203A>G_p.Y68C
HEXA_15:72375770_A>G_3	GCTATCGTGACCTGCTTTT	HEXA_c.203A>G_p.Y68C
HEXA_15:72375770_A>G_2	CTATCGTGACCTGCTTTTC	HEXA_c.203A>G_p.Y68C
HERC2_15:28130205_A>G_6	ATCGCCATCGCCACTGGCT	HERC2_c.12760A>G_p.I4254V
HERC2_15:28130205_A>G_5	TCGCCATCGCCACTGGCTC	HERC2_c.12760A>G_p.I4254V
HERC2_15:28130205_A>G_4	CGCCATCGCCACTGGCTCC	HERC2_c.12760A>G_p.I4254V
HERC2_15:28130205_A>G_3	GCCATCGCCACTGGCTCCC	HERC2_c.12760A>G_p.I4254V
HERC2_15:28130205_A>G_2	CCATCGCCACTGGCTCCCT	HERC2_c.12760A>G_p.I4254V
HENMT1_1:108655662_A>G_6	CTCTTAAGGCTGCTAAAAG	HENMT1_c.187A>G_p.R63G
HENMT1_1:108655662_A>G_5	TCTTAAGGCTGCTAAAAGT	HENMT1_c.187A>G_p.R63G
HENMT1_1:108655662_A>G_4	CTTAAGGCTGCTAAAAGTC	HENMT1_c.187A>G_p.R63G
HENMT1_1:108655662_A>G_3	TTAAGGCTGCTAAAAGTCA	HENMT1_c.187A>G_p.R63G
HENMT1_1:108655662_A>G_2	TAAGGCTGCTAAAAGTCAA	HENMT1_c.187A>G_p.R63G
HELZ2_20:63568433_A>G_6	AGACCTACACGCTGGCCAT	HELZ2_c.1655A>G_p.Y552C
HELZ2_20:63568433_A>G_5	GACCTACACGCTGGCCATG	HELZ2_c.1655A>G_p.Y552C
HELZ2_20:63568433_A>G_4	ACCTACACGCTGGCCATGG	HELZ2_c.1655A>G_p.Y552C
HELZ2_20:63568433_A>G_3	CCTACACGCTGGCCATGGC	HELZ2_c.1655A>G_p.Y552C
HELZ2_20:63568433_A>G_2	CTACACGCTGGCCATGGCC	HELZ2_c.1655A>G_p.Y552C
HECTD3_1:45006998_A>G_6	GCTATGACCAGTGGTGGGA	HECTD3_c.1574A>G_p.D525G
HECTD3_1:45006998_A>G_5	CTATGACCAGTGGTGGGAG	HECTD3_c.1574A>G_p.D525G
HECTD3_1:45006998_A>G_4	TATGACCAGTGGTGGGAGT	HECTD3_c.1574A>G_p.D525G
HECTD3_1:45006998_A>G_3	ATGACCAGTGGTGGGAGTG	HECTD3_c.1574A>G_p.D525G
HECTD3_1:45006998_A>G_2	TGACCAGTGGTGGGAGTGT	HECTD3_c.1574A>G_p.D525G
GSE1_16:85654837_A>G_6	ACCGTGACCGAGGACTACC	GSE1_c.643A>G_p.T215A
GSE1_16:85654837_A>G_5	CCGTGACCGAGGACTACCT	GSE1_c.643A>G_p.T215A
GSE1_16:85654837_A>G_4	CGTGACCGAGGACTACCTG	GSE1_c.643A>G_p.T215A
GSE1_16:85654837_A>G_3	GTGACCGAGGACTACCTGA	GSE1_c.643A>G_p.T215A
GSE1_16:85654837_A>G_2	TGACCGAGGACTACCTGAG	GSE1_c.643A>G_p.T215A
GRM4_6:34061997_A>G_6	GAAGATACCACGGGAGCCC	GRM4_c.768A>G_p.I256M
GRM4_6:34061997_A>G_5	AAGATACCACGGGAGCCCA	GRM4_c.768A>G_p.I256M
GRM4_6:34061997_A>G_4	AGATACCACGGGAGCCCAA	GRM4_c.768A>G_p.I256M
GRM4_6:34061997_A>G_3	GATACCACGGGAGCCCAAG	GRM4_c.768A>G_p.I256M
GRM4_6:34061997_A>G_2	ATACCACGGGAGCCCAAGG	GRM4_c.768A>G_p.I256M
GRIN3A_9:101687046_A>G_6	CCCAGAATAATTCCAAGTT	GRIN3A_c.854A>G_p.N285S
GRIN3A_9:101687046_A>G_5	CCAGAATAATTCCAAGTTC	GRIN3A_c.854A>G_p.N285S
GRIN3A_9:101687046_A>G_4	CAGAATAATTCCAAGTTCC	GRIN3A_c.854A>G_p.N285S
GRIN3A_9:101687046_A>G_3	AGAATAATTCCAAGTTCCA	GRIN3A_c.854A>G_p.N285S
GRIN3A_9:101687046_A>G_2	GAATAATTCCAAGTTCCAC	GRIN3A_c.854A>G_p.N285S
GOLGA1_9:124881244_T>C_6	GCTTTTATAAGATGAAAAG	GOLGA1_c.2150T>C_p.I717T
GOLGA1_9:124881244_T>C_5	CTTTTATAAGATGAAAAGC	GOLGA1_c.2150T>C_p.I717T
GOLGA1_9:124881244_T>C_4	TTTTATAAGATGAAAAGCC	GOLGA1_c.2150T>C_p.I717T
GOLGA1_9:124881244_T>C_3	TTTATAAGATGAAAAGCCT	GOLGA1_c.2150T>C_p.I717T
GOLGA1_9:124881244_T>C_2	TTATAAGATGAAAAGCCTG	GOLGA1_c.2150T>C_p.I717T
GNG4_1:235583819_A>G_6	TGTCTAATAACAGCACCAC	GNG4_c.20A>G_p.N7S
GNG4_1:235583819_A>G_5	GTCTAATAACAGCACCACT	GNG4_c.20A>G_p.N7S
GNG4_1:235583819_A>G_4	TCTAATAACAGCACCACTA	GNG4_c.20A>G_p.N7S
GNG4_1:235583819_A>G_3	CTAATAACAGCACCACTAG	GNG4_c.20A>G_p.N7S
GNG4_1:235583819_A>G_2	TAATAACAGCACCACTAGC	GNG4_c.20A>G_p.N7S
GLE1_9:128523695_A>G_6	CCCTCTATGCTCTGCAGGA	GLE1_c.746A>G_p.Y249C
GLE1_9:128523695_A>G_5	CCTCTATGCTCTGCAGGAG	GLE1_c.746A>G_p.Y249C
GLE1_9:128523695_A>G_4	CTCTATGCTCTGCAGGAGG	GLE1_c.746A>G_p.Y249C
GLE1_9:128523695_A>G_3	TCTATGCTCTGCAGGAGGA	GLE1_c.746A>G_p.Y249C
GLE1_9:128523695_A>G_2	CTATGCTCTGCAGGAGGAG	GLE1_c.746A>G_p.Y249C
GLCE_15:69256054_A>G_6	AGCAGAAAGCACCCCCTGT	GLCE_c.248A>G_p.K83R
GLCE_15:69256054_A>G_5	GCAGAAAGCACCCCCTGTT	GLCE_c.248A>G_p.K83R
GLCE_15:69256054_A>G_4	CAGAAAGCACCCCCTGTTG	GLCE_c.248A>G_p.K83R
GLCE_15:69256054_A>G_3	AGAAAGCACCCCCTGTTGT	GLCE_c.248A>G_p.K83R
GLCE_15:69256054_A>G_2	GAAAGCACCCCCTGTTGTT	GLCE_c.248A>G_p.K83R
GDF3_12:7690380_T>C_6	AACCCGAAATTTTTCCGGG	GDF3_c.593T>C_p.F198S
GDF3_12:7690380_T>C_5	ACCCGAAATTTTTCCGGGG	GDF3_c.593T>C_p.F198S
GDF3_12:7690380_T>C_4	CCCGAAATTTTTCCGGGGG	GDF3_c.593T>C_p.F198S
GDF3_12:7690380_T>C_3	CCGAAATTTTTCCGGGGGT	GDF3_c.593T>C_p.F198S
GDF3_12:7690380_T>C_2	CGAAATTTTTCCGGGGGTT	GDF3_c.593T>C_p.F198S
GATA3_10:8074003_A>G_6	TCCAGCATGGTCACCGCCA	GATA3_c.1315A>G_p.M439V
GATA3_10:8074003_A>G_5	CCAGCATGGTCACCGCCAT	GATA3_c.1315A>G_p.M439V
GATA3_10:8074003_A>G_4	CAGCATGGTCACCGCCATG	GATA3_c.1315A>G_p.M439V
GATA3_10:8074003_A>G_3	AGCATGGTCACCGCCATGG	GATA3_c.1315A>G_p.M439V
GATA3_10:8074003_A>G_2	GCATGGTCACCGCCATGGG	GATA3_c.1315A>G_p.M439V
GANC_15:42314082_A>G_6	ACAGACATTGGAGAAAAAT	GANC_c.1060A>G_p.I354V
GANC_15:42314082_A>G_5	CAGACATTGGAGAAAAATA	GANC_c.1060A>G_p.I354V
GANC_15:42314082_A>G_4	AGACATTGGAGAAAAATAG	GANC_c.1060A>G_p.I354V
GANC_15:42314082_A>G_3	GACATTGGAGAAAAATAGC	GANC_c.1060A>G_p.I354V
GANC_15:42314082_A>G_2	ACATTGGAGAAAAATAGCT	GANC_c.1060A>G_p.I354V
GALNT6_12:51364277_T>C_6	GTGACGATGTCTGGGCTCA	GALNT6_c.893T>C_p.I298T
GALNT6_12:51364277_T>C_5	TGACGATGTCTGGGCTCAC	GALNT6_c.893T>C_p.I298T
GALNT6_12:51364277_T>C_4	GACGATGTCTGGGCTCACC	GALNT6_c.893T>C_p.I298T
GALNT6_12:51364277_T>C_3	ACGATGTCTGGGCTCACCA	GALNT6_c.893T>C_p.I298T
GALNT6_12:51364277_T>C_2	CGATGTCTGGGCTCACCAC	GALNT6_c.893T>C_p.I298T
GAGE12J_X:49323219_A>G_6	CGACCTATTATTGGCCTAG	GAGE12J_c.26A>G_p.Y9C
GAGE12J_X:49323219_A>G_5	GACCTATTATTGGCCTAGA	GAGE12J_c.26A>G_p.Y9C
GAGE12J_X:49323219_A>G_4	ACCTATTATTGGCCTAGAC	GAGE12J_c.26A>G_p.Y9C
GAGE12J_X:49323219_A>G_3	CCTATTATTGGCCTAGACC	GAGE12J_c.26A>G_p.Y9C
GAGE12J_X:49323219_A>G_2	CTATTATTGGCCTAGACCA	GAGE12J_c.26A>G_p.Y9C
GABBR2_9:98290624_A>G_6	ACAGACATGTGCCACCCTC	GABBR2_c.2786A>G_p.H929R
GABBR2_9:98290624_A>G_5	CAGACATGTGCCACCCTCC	GABBR2_c.2786A>G_p.H929R
GABBR2_9:98290624_A>G_4	AGACATGTGCCACCCTCCT	GABBR2_c.2786A>G_p.H929R
GABBR2_9:98290624_A>G_3	GACATGTGCCACCCTCCTT	GABBR2_c.2786A>G_p.H929R
GABBR2_9:98290624_A>G_2	ACATGTGCCACCCTCCTTC	GABBR2_c.2786A>G_p.H929R
GABBR1_6:29630506_A>G_6	TCCCGGAGCATCTGTAGTC	GABBR1_c.427A>G_p.S143G
GABBR1_6:29630506_A>G_5	CCCGGAGCATCTGTAGTCA	GABBR1_c.427A>G_p.S143G
GABBR1_6:29630506_A>G_4	CCGGAGCATCTGTAGTCAG	GABBR1_c.427A>G_p.S143G
GABBR1_6:29630506_A>G_3	CGGAGCATCTGTAGTCAGG	GABBR1_c.427A>G_p.S143G
GABBR1_6:29630506_A>G_2	GGAGCATCTGTAGTCAGGG	GABBR1_c.427A>G_p.S143G
FSIP2_2:185790497_A>G_6	AAGGACATATCTTCCGTTC	FSIP2_c.3361A>G_p.I1121V
FSIP2_2:185790497_A>G_5	AGGACATATCTTCCGTTCC	FSIP2_c.3361A>G_p.I1121V
FSIP2_2:185790497_A>G_4	GGACATATCTTCCGTTCCT	FSIP2_c.3361A>G_p.I1121V
FSIP2_2:185790497_A>G_3	GACATATCTTCCGTTCCTT	FSIP2_c.3361A>G_p.I1121V
FSIP2_2:185790497_A>G_2	ACATATCTTCCGTTCCTTT	FSIP2_c.3361A>G_p.I1121V
FRYL_4:48534661_A>G_6	TCCAGTATGCAGCAATCAT	FRYL_c.6589A>G_p.M2197V
FRYL_4:48534661_A>G_5	CCAGTATGCAGCAATCATT	FRYL_c.6589A>G_p.M2197V
FRYL_4:48534661_A>G_4	CAGTATGCAGCAATCATTA	FRYL_c.6589A>G_p.M2197V
FRYL_4:48534661_A>G_3	AGTATGCAGCAATCATTAC	FRYL_c.6589A>G_p.M2197V
FRYL_4:48534661_A>G_2	GTATGCAGCAATCATTACT	FRYL_c.6589A>G_p.M2197V
FRG1_4:189957470_A>G_6	GCAAAAAGTAAAACAGCAG	FRG1_c.505A>G_p.S169G
FRG1_4:189957470_A>G_5	CAAAAAGTAAAACAGCAGG	FRG1_c.505A>G_p.S169G
FRG1_4:189957470_A>G_4	AAAAAGTAAAACAGCAGGA	FRG1_c.505A>G_p.S169G
FRG1_4:189957470_A>G_3	AAAAGTAAAACAGCAGGAG	FRG1_c.505A>G_p.S169G
FRG1_4:189957470_A>G_2	AAAGTAAAACAGCAGGAGA	FRG1_c.505A>G_p.S169G
FOLH1_11:49183180_A>G_6	CATCCAATTGGATACTATG	FOLH1_c.889A>G_p.I297V
FOLH1_11:49183180_A>G_5	ATCCAATTGGATACTATGA	FOLH1_c.889A>G_p.I297V
FOLH1_11:49183180_A>G_4	TCCAATTGGATACTATGAT	FOLH1_c.889A>G_p.I297V
FOLH1_11:49183180_A>G_3	CCAATTGGATACTATGATG	FOLH1_c.889A>G_p.I297V
FOLH1_11:49183180_A>G_2	CAATTGGATACTATGATGC	FOLH1_c.889A>G_p.I297V
FNIP1_5:131672427_T>C_6	CAAAGCAAGTTCTTAATTT	FNIP1_c.2017T>C_p.C673R
FNIP1_5:131672427_T>C_5	AAAGCAAGTTCTTAATTTA	FNIP1_c.2017T>C_p.C673R
FNIP1_5:131672427_T>C_4	AAGCAAGTTCTTAATTTAT	FNIP1_c.2017T>C_p.C673R
FNIP1_5:131672427_T>C_3	AGCAAGTTCTTAATTTATC	FNIP1_c.2017T>C_p.C673R
FNIP1_5:131672427_T>C_2	GCAAGTTCTTAATTTATCT	FNIP1_c.2017T>C_p.C673R
FLT1_13:28431199_T>C_6	AAGTATAAAGTCCTTTGTC	FLT1_c.925T>C_p.Y309H
FLT1_13:28431199_T>C_5	AGTATAAAGTCCTTTGTCT	FLT1_c.925T>C_p.Y309H
FLT1_13:28431199_T>C_4	GTATAAAGTCCTTTGTCTT	FLT1_c.925T>C_p.Y309H
FLT1_13:28431199_T>C_3	TATAAAGTCCTTTGTCTTT	FLT1_c.925T>C_p.Y309H
FLT1_13:28431199_T>C_2	ATAAAGTCCTTTGTCTTTG	FLT1_c.925T>C_p.Y309H
FLNB_3:58146877_A>G_6	TTGACAATAAAGATGGGAC	FLNB_c.5705A>G_p.N1902S
FLNB_3:58146877_A>G_5	TGACAATAAAGATGGGACA	FLNB_c.5705A>G_p.N1902S
FLNB_3:58146877_A>G_4	GACAATAAAGATGGGACAT	FLNB_c.5705A>G_p.N1902S
FLNB_3:58146877_A>G_3	ACAATAAAGATGGGACATG	FLNB_c.5705A>G_p.N1902S
FLNB_3:58146877_A>G_2	CAATAAAGATGGGACATGC	FLNB_c.5705A>G_p.N1902S
FLNB_3:58123517_A>G_6	TTCAGAACAACAAAGATGG	FLNB_c.3551A>G_p.N1184S
FLNB_3:58123517_A>G_5	TCAGAACAACAAAGATGGC	FLNB_c.3551A>G_p.N1184S
FLNB_3:58123517_A>G_4	CAGAACAACAAAGATGGCA	FLNB_c.3551A>G_p.N1184S
FLNB_3:58123517_A>G_3	AGAACAACAAAGATGGCAC	FLNB_c.3551A>G_p.N1184S
FLNB_3:58123517_A>G_2	GAACAACAAAGATGGCACC	FLNB_c.3551A>G_p.N1184S
FLII_17:18247994_A>G_6	CAGATCAACTACAAGCTCT	FLII_c.2230A>G_p.N744D
FLII_17:18247994_A>G_5	AGATCAACTACAAGCTCTC	FLII_c.2230A>G_p.N744D
FLII_17:18247994_A>G_4	GATCAACTACAAGCTCTCC	FLII_c.2230A>G_p.N744D
FLII_17:18247994_A>G_3	ATCAACTACAAGCTCTCCG	FLII_c.2230A>G_p.N744D
FLII_17:18247994_A>G_2	TCAACTACAAGCTCTCCGT	FLII_c.2230A>G_p.N744D
FKBP1A_20:1370040_A>G_6	CCAGACATGTGCACATGAA	FKBP1A_c.283A>G_p.M95V
FKBP1A_20:1370040_A>G_5	CAGACATGTGCACATGAAT	FKBP1A_c.283A>G_p.M95V
FKBP1A_20:1370040_A>G_4	AGACATGTGCACATGAATC	FKBP1A_c.283A>G_p.M95V
FKBP1A_20:1370040_A>G_3	GACATGTGCACATGAATCC	FKBP1A_c.283A>G_p.M95V
FKBP1A_20:1370040_A>G_2	ACATGTGCACATGAATCCA	FKBP1A_c.283A>G_p.M95V
FGG_4:154611895_T>C_6	TCTATCATATCTGTAATAT	FGG_c.311T>C_p.M104T
FGG_4:154611895_T>C_5	CTATCATATCTGTAATATA	FGG_c.311T>C_p.M104T
FGG_4:154611895_T>C_4	TATCATATCTGTAATATAG	FGG_c.311T>C_p.M104T
FGG_4:154611895_T>C_3	ATCATATCTGTAATATAGG	FGG_c.311T>C_p.M104T
FGG_4:154611895_T>C_2	TCATATCTGTAATATAGGA	FGG_c.311T>C_p.M104T
FERMT1_20:6079471_A>G_6	ACAAATATCAAACAGTGGA	FERMT1_c.1825A>G_p.I609V
FERMT1_20:6079471_A>G_5	CAAATATCAAACAGTGGAA	FERMT1_c.1825A>G_p.I609V
FERMT1_20:6079471_A>G_4	AAATATCAAACAGTGGAAT	FERMT1_c.1825A>G_p.I609V
FERMT1_20:6079471_A>G_3	AATATCAAACAGTGGAATG	FERMT1_c.1825A>G_p.I609V
FERMT1_20:6079471_A>G_2	ATATCAAACAGTGGAATGT	FERMT1_c.1825A>G_p.I609V
FCRLA_1:161711297_A>G_6	CCACTGACTCAGGTGACCT	FCRLA_c.391A>G_p.T131A
FCRLA_1:161711297_A>G_5	CACTGACTCAGGTGACCTT	FCRLA_c.391A>G_p.T131A
FCRLA_1:161711297_A>G_4	ACTGACTCAGGTGACCTTC	FCRLA_c.391A>G_p.T131A
FCRLA_1:161711297_A>G_3	CTGACTCAGGTGACCTTCT	FCRLA_c.391A>G_p.T131A
FCRLA_1:161711297_A>G_2	TGACTCAGGTGACCTTCTA	FCRLA_c.391A>G_p.T131A
FAT3_11:92355141_T>C_6	GCCCGCACAGTAAGGTTAT	FAT3_c.3029T>C_p.V1010A
FAT3_11:92355141_T>C_5	CCCGCACAGTAAGGTTATA	FAT3_c.3029T>C_p.V1010A
FAT3_11:92355141_T>C_4	CCGCACAGTAAGGTTATAG	FAT3_c.3029T>C_p.V1010A
FAT3_11:92355141_T>C_3	CGCACAGTAAGGTTATAGA	FAT3_c.3029T>C_p.V1010A
FAT3_11:92355141_T>C_2	GCACAGTAAGGTTATAGAA	FAT3_c.3029T>C_p.V1010A
FASN_17:82093615_T>C_6	AAGAAGAAGGAGAGCCGGT	FASN_c.437T>C_p.F146S
FASN_17:82093615_T>C_5	AGAAGAAGGAGAGCCGGTT	FASN_c.437T>C_p.F146S
FASN_17:82093615_T>C_4	GAAGAAGGAGAGCCGGTTG	FASN_c.437T>C_p.F146S
FASN_17:82093615_T>C_3	AAGAAGGAGAGCCGGTTGG	FASN_c.437T>C_p.F146S
FASN_17:82093615_T>C_2	AGAAGGAGAGCCGGTTGGC	FASN_c.437T>C_p.F146S
FAM47A_X:34130351_A>G_6	ACCAAAAGTTTAAGAAAGT	FAM47A_c.1928A>G_p.K643R
FAM47A_X:34130351_A>G_5	CCAAAAGTTTAAGAAAGTA	FAM47A_c.1928A>G_p.K643R
FAM47A_X:34130351_A>G_4	CAAAAGTTTAAGAAAGTAA	FAM47A_c.1928A>G_p.K643R
FAM47A_X:34130351_A>G_3	AAAAGTTTAAGAAAGTAAA	FAM47A_c.1928A>G_p.K643R
FAM47A_X:34130351_A>G_2	AAAGTTTAAGAAAGTAAAG	FAM47A_c.1928A>G_p.K643R
FAM214A_15:52593700_A>G_6	CTCGGCATTGTTGATGGTT	FAM214A_c.2707A>G_p.I903V
FAM214A_15:52593700_A>G_5	TCGGCATTGTTGATGGTTT	FAM214A_c.2707A>G_p.I903V
FAM214A_15:52593700_A>G_4	CGGCATTGTTGATGGTTTT	FAM214A_c.2707A>G_p.I903V
FAM214A_15:52593700_A>G_3	GGCATTGTTGATGGTTTTA	FAM214A_c.2707A>G_p.I903V
FAM214A_15:52593700_A>G_2	GCATTGTTGATGGTTTTAC	FAM214A_c.2707A>G_p.I903V
FAM186A_12:50363339_T>C_6	TTCATTATTTCACTCAGCT	FAM186A_c.218T>C_p.I73T
FAM186A_12:50363339_T>C_5	TCATTATTTCACTCAGCTG	FAM186A_c.218T>C_p.I73T
FAM186A_12:50363339_T>C_4	CATTATTTCACTCAGCTGC	FAM186A_c.218T>C_p.I73T
FAM186A_12:50363339_T>C_3	ATTATTTCACTCAGCTGCA	FAM186A_c.218T>C_p.I73T
FAM186A_12:50363339_T>C_2	TTATTTCACTCAGCTGCAT	FAM186A_c.218T>C_p.I73T
FAM160B1_10:114861518_A>G_6	TAAAATATCATGCTTCCTC	FAM160B1_c.2276A>G_p.Y759C
FAM160B1_10:114861518_A>G_5	AAAATATCATGCTTCCTCC	FAM160B1_c.2276A>G_p.Y759C
FAM160B1_10:114861518_A>G_4	AAATATCATGCTTCCTCCA	FAM160B1_c.2276A>G_p.Y759C
FAM160B1_10:114861518_A>G_3	AATATCATGCTTCCTCCAC	FAM160B1_c.2276A>G_p.Y759C
FAM160B1_10:114861518_A>G_2	ATATCATGCTTCCTCCACA	FAM160B1_c.2276A>G_p.Y759C
FAM135A_6:70523972_A>G_6	GTGCTCAGAGTCATCTACA	FAM135A_c.1109A>G_p.Q370R
FAM135A_6:70523972_A>G_5	TGCTCAGAGTCATCTACAG	FAM135A_c.1109A>G_p.Q370R
FAM135A_6:70523972_A>G_4	GCTCAGAGTCATCTACAGA	FAM135A_c.1109A>G_p.Q370R
FAM135A_6:70523972_A>G_3	CTCAGAGTCATCTACAGAT	FAM135A_c.1109A>G_p.Q370R
FAM135A_6:70523972_A>G_2	TCAGAGTCATCTACAGATG	FAM135A_c.1109A>G_p.Q370R
EVX2_2:176083697_A>G_6	TCTCCAATTTGTCCAACTC	EVX2_c.80A>G_p.N27S
EVX2_2:176083697_A>G_5	CTCCAATTTGTCCAACTCG	EVX2_c.80A>G_p.N27S
EVX2_2:176083697_A>G_4	TCCAATTTGTCCAACTCGG	EVX2_c.80A>G_p.N27S
EVX2_2:176083697_A>G_3	CCAATTTGTCCAACTCGGC	EVX2_c.80A>G_p.N27S
EVX2_2:176083697_A>G_2	CAATTTGTCCAACTCGGCT	EVX2_c.80A>G_p.N27S
ESYT3_3:138470911_T>C_6	TCCAGCATTCCCAGAGCAC	ESYT3_c.1625T>C_p.M542T
ESYT3_3:138470911_T>C_5	CCAGCATTCCCAGAGCACA	ESYT3_c.1625T>C_p.M542T
ESYT3_3:138470911_T>C_4	CAGCATTCCCAGAGCACAC	ESYT3_c.1625T>C_p.M542T
ESYT3_3:138470911_T>C_3	AGCATTCCCAGAGCACACT	ESYT3_c.1625T>C_p.M542T
ESYT3_3:138470911_T>C_2	GCATTCCCAGAGCACACTC	ESYT3_c.1625T>C_p.M542T
ESRRA_11:64307451_A>G_6	ACCACTATGGTGTGGCATC	ESRRA_c.272A>G_p.Y91C
ESRRA_11:64307451_A>G_5	CCACTATGGTGTGGCATCC	ESRRA_c.272A>G_p.Y91C
ESRRA_11:64307451_A>G_4	CACTATGGTGTGGCATCCT	ESRRA_c.272A>G_p.Y91C
ESRRA_11:64307451_A>G_3	ACTATGGTGTGGCATCCTG	ESRRA_c.272A>G_p.Y91C
ESRRA_11:64307451_A>G_2	CTATGGTGTGGCATCCTGT	ESRRA_c.272A>G_p.Y91C
ESR1_6:152098791_A>G_6	TCTATGACCTGCTGCTGGA	ESR1_c.1613A>G_p.D538G
ESR1_6:152098791_A>G_5	CTATGACCTGCTGCTGGAG	ESR1_c.1613A>G_p.D538G
ESR1_6:152098791_A>G_4	TATGACCTGCTGCTGGAGA	ESR1_c.1613A>G_p.D538G
ESR1_6:152098791_A>G_3	ATGACCTGCTGCTGGAGAT	ESR1_c.1613A>G_p.D538G
ESR1_6:152098791_A>G_2	TGACCTGCTGCTGGAGATG	ESR1_c.1613A>G_p.D538G
ESR1_6:152098788_A>G_6	CCCTCTATGACCTGCTGCT	ESR1_c.1610A>G_p.Y537C
ESR1_6:152098788_A>G_5	CCTCTATGACCTGCTGCTG	ESR1_c.1610A>G_p.Y537C
ESR1_6:152098788_A>G_4	CTCTATGACCTGCTGCTGG	ESR1_c.1610A>G_p.Y537C
ESR1_6:152098788_A>G_3	TCTATGACCTGCTGCTGGA	ESR1_c.1610A>G_p.Y537C
ESR1_6:152098788_A>G_2	CTATGACCTGCTGCTGGAG	ESR1_c.1610A>G_p.Y537C
ESR1_6:151944320_A>G_6	CTAAGAAGAACAGCCTGGC	ESR1_c.908A>G_p.K303R
ESR1_6:151944320_A>G_5	TAAGAAGAACAGCCTGGCC	ESR1_c.908A>G_p.K303R
ESR1_6:151944320_A>G_4	AAGAAGAACAGCCTGGCCT	ESR1_c.908A>G_p.K303R
ESR1_6:151944320_A>G_3	AGAAGAACAGCCTGGCCTT	ESR1_c.908A>G_p.K303R
ESR1_6:151944320_A>G_2	GAAGAACAGCCTGGCCTTG	ESR1_c.908A>G_p.K303R
ESPNL_2:238100673_A>G_6	TGGCCGAGCTGTGCTGGCT	ESPNL_c.254A>G_p.E85G
ESPNL_2:238100673_A>G_5	GGCCGAGCTGTGCTGGCTG	ESPNL_c.254A>G_p.E85G
ESPNL_2:238100673_A>G_4	GCCGAGCTGTGCTGGCTGG	ESPNL_c.254A>G_p.E85G
ESPNL_2:238100673_A>G_3	CCGAGCTGTGCTGGCTGGT	ESPNL_c.254A>G_p.E85G
ESPNL_2:238100673_A>G_2	CGAGCTGTGCTGGCTGGTC	ESPNL_c.254A>G_p.E85G
ERICH6B_13:45596602_A>G_6	ATCTGGAGGAGGAAGAGTA	ERICH6B_c.404A>G_p.E135G
ERICH6B_13:45596602_A>G_5	TCTGGAGGAGGAAGAGTAT	ERICH6B_c.404A>G_p.E135G
ERICH6B_13:45596602_A>G_4	CTGGAGGAGGAAGAGTATC	ERICH6B_c.404A>G_p.E135G
ERICH6B_13:45596602_A>G_3	TGGAGGAGGAAGAGTATCT	ERICH6B_c.404A>G_p.E135G
ERICH6B_13:45596602_A>G_2	GGAGGAGGAAGAGTATCTG	ERICH6B_c.404A>G_p.E135G
ERICH6B_13:45596593_A>G_6	AGGAAGAGTATCTGGGGAA	ERICH6B_c.413A>G_p.E138G
ERICH6B_13:45596593_A>G_5	GGAAGAGTATCTGGGGAAG	ERICH6B_c.413A>G_p.E138G
ERICH6B_13:45596593_A>G_4	GAAGAGTATCTGGGGAAGG	ERICH6B_c.413A>G_p.E138G
ERICH6B_13:45596593_A>G_3	AAGAGTATCTGGGGAAGGA	ERICH6B_c.413A>G_p.E138G
ERICH6B_13:45596593_A>G_2	AGAGTATCTGGGGAAGGAA	ERICH6B_c.413A>G_p.E138G
ERICH6B_13:45596591_T>C_6	CCAGATACTCTTCCTCCTC	ERICH6B_c.415T>C_p.Y139H
ERICH6B_13:45596591_T>C_5	CAGATACTCTTCCTCCTCC	ERICH6B_c.415T>C_p.Y139H
ERICH6B_13:45596591_T>C_4	AGATACTCTTCCTCCTCCA	ERICH6B_c.415T>C_p.Y139H
ERICH6B_13:45596591_T>C_3	GATACTCTTCCTCCTCCAG	ERICH6B_c.415T>C_p.Y139H
[truncated: 1,454 more rows]

## Sheet: hPANCAN-CBE
ID	Sequence	SNV
ZSCAN18_19:58090111_C>T_6	CGTTTCCGGGAATTTGTCT	ZSCAN18_c.325C>T_p.R109W
ZSCAN18_19:58090111_C>T_5	GTTTCCGGGAATTTGTCTA	ZSCAN18_c.325C>T_p.R109W
ZSCAN18_19:58090111_C>T_4	TTTCCGGGAATTTGTCTAC	ZSCAN18_c.325C>T_p.R109W
ZSCAN18_19:58090111_C>T_3	TTCCGGGAATTTGTCTACC	ZSCAN18_c.325C>T_p.R109W
ZSCAN18_19:58090111_C>T_2	TCCGGGAATTTGTCTACCA	ZSCAN18_c.325C>T_p.R109W
ZRANB1_10:124942729_C>T_6	AATCTTCGTATAGCATGGA	ZRANB1_c.236C>T_p.S79L
ZRANB1_10:124942729_C>T_5	ATCTTCGTATAGCATGGAA	ZRANB1_c.236C>T_p.S79L
ZRANB1_10:124942729_C>T_4	TCTTCGTATAGCATGGAAA	ZRANB1_c.236C>T_p.S79L
ZRANB1_10:124942729_C>T_3	CTTCGTATAGCATGGAAAA	ZRANB1_c.236C>T_p.S79L
ZRANB1_10:124942729_C>T_2	TTCGTATAGCATGGAAAAT	ZRANB1_c.236C>T_p.S79L
ZNF853_7:6622925_C>T_6	CCCGCGCGGAGCAGGCCGC	ZNF853_c.1934C>T_p.A645V
ZNF853_7:6622925_C>T_5	CCGCGCGGAGCAGGCCGCT	ZNF853_c.1934C>T_p.A645V
ZNF853_7:6622925_C>T_4	CGCGCGGAGCAGGCCGCTA	ZNF853_c.1934C>T_p.A645V
ZNF853_7:6622925_C>T_3	GCGCGGAGCAGGCCGCTAC	ZNF853_c.1934C>T_p.A645V
ZNF853_7:6622925_C>T_2	CGCGGAGCAGGCCGCTACA	ZNF853_c.1934C>T_p.A645V
ZNF814_19:57874431_G>A_6	CTTTTCCCAGTGTGAACTC	ZNF814_c.959G>A_p.G320E
ZNF814_19:57874431_G>A_5	TTTTCCCAGTGTGAACTCT	ZNF814_c.959G>A_p.G320E
ZNF814_19:57874431_G>A_4	TTTCCCAGTGTGAACTCTC	ZNF814_c.959G>A_p.G320E
ZNF814_19:57874431_G>A_3	TTCCCAGTGTGAACTCTCT	ZNF814_c.959G>A_p.G320E
ZNF814_19:57874431_G>A_2	TCCCAGTGTGAACTCTCTG	ZNF814_c.959G>A_p.G320E
ZNF814_19:57874425_G>A_6	TAAGGTCTTTTCCCAGTGT	ZNF814_c.965G>A_p.R322K
ZNF814_19:57874425_G>A_5	AAGGTCTTTTCCCAGTGTG	ZNF814_c.965G>A_p.R322K
ZNF814_19:57874425_G>A_4	AGGTCTTTTCCCAGTGTGA	ZNF814_c.965G>A_p.R322K
ZNF814_19:57874425_G>A_3	GGTCTTTTCCCAGTGTGAA	ZNF814_c.965G>A_p.R322K
ZNF814_19:57874425_G>A_2	GTCTTTTCCCAGTGTGAAC	ZNF814_c.965G>A_p.R322K
ZNF814_19:57874380_C>T_6	AATATGCTAGCTTCAGTAA	ZNF814_c.1010C>T_p.A337V
ZNF814_19:57874380_C>T_5	ATATGCTAGCTTCAGTAAT	ZNF814_c.1010C>T_p.A337V
ZNF814_19:57874380_C>T_4	TATGCTAGCTTCAGTAATC	ZNF814_c.1010C>T_p.A337V
ZNF814_19:57874380_C>T_3	ATGCTAGCTTCAGTAATCA	ZNF814_c.1010C>T_p.A337V
ZNF814_19:57874380_C>T_2	TGCTAGCTTCAGTAATCAT	ZNF814_c.1010C>T_p.A337V
ZNF799_19:12391038_G>A_6	CTTTCCCACATTTGCATTT	ZNF799_c.1360G>A_p.G454R
ZNF799_19:12391038_G>A_5	TTTCCCACATTTGCATTTA	ZNF799_c.1360G>A_p.G454R
ZNF799_19:12391038_G>A_4	TTCCCACATTTGCATTTAT	ZNF799_c.1360G>A_p.G454R
ZNF799_19:12391038_G>A_3	TCCCACATTTGCATTTATA	ZNF799_c.1360G>A_p.G454R
ZNF799_19:12391038_G>A_2	CCCACATTTGCATTTATAG	ZNF799_c.1360G>A_p.G454R
ZNF786_7:149072021_C>T_6	TTCCGCCGGAAGCTGTGTC	ZNF786_c.751C>T_p.R251W
ZNF786_7:149072021_C>T_5	TCCGCCGGAAGCTGTGTCT	ZNF786_c.751C>T_p.R251W
ZNF786_7:149072021_C>T_4	CCGCCGGAAGCTGTGTCTG	ZNF786_c.751C>T_p.R251W
ZNF786_7:149072021_C>T_3	CGCCGGAAGCTGTGTCTGC	ZNF786_c.751C>T_p.R251W
ZNF786_7:149072021_C>T_2	GCCGGAAGCTGTGTCTGCT	ZNF786_c.751C>T_p.R251W
ZNF785_16:30585484_G>A_6	CATTCCCACTCCTCGGGAG	ZNF785_c.128G>A_p.W43*
ZNF785_16:30585484_G>A_5	ATTCCCACTCCTCGGGAGA	ZNF785_c.128G>A_p.W43*
ZNF785_16:30585484_G>A_4	TTCCCACTCCTCGGGAGAG	ZNF785_c.128G>A_p.W43*
ZNF785_16:30585484_G>A_3	TCCCACTCCTCGGGAGAGA	ZNF785_c.128G>A_p.W43*
ZNF785_16:30585484_G>A_2	CCCACTCCTCGGGAGAGAA	ZNF785_c.128G>A_p.W43*
ZNF729_19:22315888_G>A_6	CATTTGCAGGGTTTCTCTC	ZNF729_c.2471G>A_p.C824Y
ZNF729_19:22315888_G>A_5	ATTTGCAGGGTTTCTCTCC	ZNF729_c.2471G>A_p.C824Y
ZNF729_19:22315888_G>A_4	TTTGCAGGGTTTCTCTCCA	ZNF729_c.2471G>A_p.C824Y
ZNF729_19:22315888_G>A_3	TTGCAGGGTTTCTCTCCAG	ZNF729_c.2471G>A_p.C824Y
ZNF729_19:22315888_G>A_2	TGCAGGGTTTCTCTCCAGT	ZNF729_c.2471G>A_p.C824Y
ZNF716_7:57469426_G>A_6	TAGGGTCTCTCTCCAGTAT	ZNF716_c.965G>A_p.R322K
ZNF716_7:57469426_G>A_5	AGGGTCTCTCTCCAGTATG	ZNF716_c.965G>A_p.R322K
ZNF716_7:57469426_G>A_4	GGGTCTCTCTCCAGTATGA	ZNF716_c.965G>A_p.R322K
ZNF716_7:57469426_G>A_3	GGTCTCTCTCCAGTATGAA	ZNF716_c.965G>A_p.R322K
ZNF716_7:57469426_G>A_2	GTCTCTCTCCAGTATGAAT	ZNF716_c.965G>A_p.R322K
ZNF711_X:85265232_C>T_6	AAGATTCTTCTCAAGAAGA	ZNF711_c.893C>T_p.S298F
ZNF711_X:85265232_C>T_5	AGATTCTTCTCAAGAAGAA	ZNF711_c.893C>T_p.S298F
ZNF711_X:85265232_C>T_4	GATTCTTCTCAAGAAGAAG	ZNF711_c.893C>T_p.S298F
ZNF711_X:85265232_C>T_3	ATTCTTCTCAAGAAGAAGA	ZNF711_c.893C>T_p.S298F
ZNF711_X:85265232_C>T_2	TTCTTCTCAAGAAGAAGAT	ZNF711_c.893C>T_p.S298F
ZNF7_8:144842300_C>T_6	ACAGTCCAAGCCTTGTTGC	ZNF7_c.1226C>T_p.P409L
ZNF7_8:144842300_C>T_5	CAGTCCAAGCCTTGTTGCA	ZNF7_c.1226C>T_p.P409L
ZNF7_8:144842300_C>T_4	AGTCCAAGCCTTGTTGCAC	ZNF7_c.1226C>T_p.P409L
ZNF7_8:144842300_C>T_3	GTCCAAGCCTTGTTGCACA	ZNF7_c.1226C>T_p.P409L
ZNF7_8:144842300_C>T_2	TCCAAGCCTTGTTGCACAT	ZNF7_c.1226C>T_p.P409L
ZNF677_19:53237724_G>A_6	GACTTGCAAGATTTGAATT	ZNF677_c.1003G>A_p.A335T
ZNF677_19:53237724_G>A_5	ACTTGCAAGATTTGAATTT	ZNF677_c.1003G>A_p.A335T
ZNF677_19:53237724_G>A_4	CTTGCAAGATTTGAATTTT	ZNF677_c.1003G>A_p.A335T
ZNF677_19:53237724_G>A_3	TTGCAAGATTTGAATTTTG	ZNF677_c.1003G>A_p.A335T
ZNF677_19:53237724_G>A_2	TGCAAGATTTGAATTTTGA	ZNF677_c.1003G>A_p.A335T
ZNF668_16:31064345_C>T_6	GCAGCGCGCCACGCTGCCA	ZNF668_c.184C>T_p.R62C
ZNF668_16:31064345_C>T_5	CAGCGCGCCACGCTGCCAC	ZNF668_c.184C>T_p.R62C
ZNF668_16:31064345_C>T_4	AGCGCGCCACGCTGCCACA	ZNF668_c.184C>T_p.R62C
ZNF668_16:31064345_C>T_3	GCGCGCCACGCTGCCACAC	ZNF668_c.184C>T_p.R62C
ZNF668_16:31064345_C>T_2	CGCGCCACGCTGCCACACA	ZNF668_c.184C>T_p.R62C
ZNF668_16:31061489_C>T_6	GCATGACGGTGGAGCATGT	ZNF668_c.1508C>T_p.T503M
ZNF668_16:31061489_C>T_5	CATGACGGTGGAGCATGTG	ZNF668_c.1508C>T_p.T503M
ZNF668_16:31061489_C>T_4	ATGACGGTGGAGCATGTGG	ZNF668_c.1508C>T_p.T503M
ZNF668_16:31061489_C>T_3	TGACGGTGGAGCATGTGGA	ZNF668_c.1508C>T_p.T503M
ZNF668_16:31061489_C>T_2	GACGGTGGAGCATGTGGAA	ZNF668_c.1508C>T_p.T503M
ZNF625_19:12147778_G>A_6	TCACATCTACATCCTCAAA	ZNF625_c.28G>A_p.D10N
ZNF625_19:12147778_G>A_5	CACATCTACATCCTCAAAG	ZNF625_c.28G>A_p.D10N
ZNF625_19:12147778_G>A_4	ACATCTACATCCTCAAAGA	ZNF625_c.28G>A_p.D10N
ZNF625_19:12147778_G>A_3	CATCTACATCCTCAAAGAC	ZNF625_c.28G>A_p.D10N
ZNF625_19:12147778_G>A_2	ATCTACATCCTCAAAGACC	ZNF625_c.28G>A_p.D10N
ZNF618_9:114002010_G>A_6	AGATTCCGCATTCGTAAGA	ZNF618_c.448G>A_p.G150R
ZNF618_9:114002010_G>A_5	GATTCCGCATTCGTAAGAC	ZNF618_c.448G>A_p.G150R
ZNF618_9:114002010_G>A_4	ATTCCGCATTCGTAAGACC	ZNF618_c.448G>A_p.G150R
ZNF618_9:114002010_G>A_3	TTCCGCATTCGTAAGACCC	ZNF618_c.448G>A_p.G150R
ZNF618_9:114002010_G>A_2	TCCGCATTCGTAAGACCCT	ZNF618_c.448G>A_p.G150R
ZNF609_15:64499759_G>A_6	CTGCCCCCTCACTTGGAGT	ZNF609_c.340G>A_p.G114R
ZNF609_15:64499759_G>A_5	TGCCCCCTCACTTGGAGTG	ZNF609_c.340G>A_p.G114R
ZNF609_15:64499759_G>A_4	GCCCCCTCACTTGGAGTGA	ZNF609_c.340G>A_p.G114R
ZNF609_15:64499759_G>A_3	CCCCCTCACTTGGAGTGAA	ZNF609_c.340G>A_p.G114R
ZNF609_15:64499759_G>A_2	CCCCTCACTTGGAGTGAAC	ZNF609_c.340G>A_p.G114R
ZNF597_16:3436450_C>T_6	CATAAGCGAACTCACATAA	ZNF597_c.1249C>T_p.R417*
ZNF597_16:3436450_C>T_5	ATAAGCGAACTCACATAAA	ZNF597_c.1249C>T_p.R417*
ZNF597_16:3436450_C>T_4	TAAGCGAACTCACATAAAA	ZNF597_c.1249C>T_p.R417*
ZNF597_16:3436450_C>T_3	AAGCGAACTCACATAAAAA	ZNF597_c.1249C>T_p.R417*
ZNF597_16:3436450_C>T_2	AGCGAACTCACATAAAAAA	ZNF597_c.1249C>T_p.R417*
ZNF470_19:56574450_G>A_6	ATTCAGCCACTCCCATTCA	ZNF470_c.117G>A_p.W39*
ZNF470_19:56574450_G>A_5	TTCAGCCACTCCCATTCAT	ZNF470_c.117G>A_p.W39*
ZNF470_19:56574450_G>A_4	TCAGCCACTCCCATTCATC	ZNF470_c.117G>A_p.W39*
ZNF470_19:56574450_G>A_3	CAGCCACTCCCATTCATCT	ZNF470_c.117G>A_p.W39*
ZNF470_19:56574450_G>A_2	AGCCACTCCCATTCATCTT	ZNF470_c.117G>A_p.W39*
ZNF469_16:88435140_G>A_6	TTTGAGCCCTGGGCAGGCG	ZNF469_c.7586G>A_p.G2529D
ZNF469_16:88435140_G>A_5	TTGAGCCCTGGGCAGGCGG	ZNF469_c.7586G>A_p.G2529D
ZNF469_16:88435140_G>A_4	TGAGCCCTGGGCAGGCGGT	ZNF469_c.7586G>A_p.G2529D
ZNF469_16:88435140_G>A_3	GAGCCCTGGGCAGGCGGTG	ZNF469_c.7586G>A_p.G2529D
ZNF469_16:88435140_G>A_2	AGCCCTGGGCAGGCGGTGG	ZNF469_c.7586G>A_p.G2529D
ZNF423_16:49638328_C>T_6	GCCAGACGGAGGAGCTGGA	ZNF423_c.824C>T_p.T275M
ZNF423_16:49638328_C>T_5	CCAGACGGAGGAGCTGGAG	ZNF423_c.824C>T_p.T275M
ZNF423_16:49638328_C>T_4	CAGACGGAGGAGCTGGAGA	ZNF423_c.824C>T_p.T275M
ZNF423_16:49638328_C>T_3	AGACGGAGGAGCTGGAGAA	ZNF423_c.824C>T_p.T275M
ZNF423_16:49638328_C>T_2	GACGGAGGAGCTGGAGAAG	ZNF423_c.824C>T_p.T275M
ZNF423_16:49636933_C>T_6	ACCTGGCGGTGAAGCACAG	ZNF423_c.2219C>T_p.A740V
ZNF423_16:49636933_C>T_5	CCTGGCGGTGAAGCACAGC	ZNF423_c.2219C>T_p.A740V
ZNF423_16:49636933_C>T_4	CTGGCGGTGAAGCACAGCA	ZNF423_c.2219C>T_p.A740V
ZNF423_16:49636933_C>T_3	TGGCGGTGAAGCACAGCAA	ZNF423_c.2219C>T_p.A740V
ZNF423_16:49636933_C>T_2	GGCGGTGAAGCACAGCAAT	ZNF423_c.2219C>T_p.A740V
ZNF398_7:149179697_G>A_6	GGGGACCTGGTGGGTTGGG	ZNF398_c.1825G>A_p.G609S
ZNF398_7:149179697_G>A_5	GGGACCTGGTGGGTTGGGT	ZNF398_c.1825G>A_p.G609S
ZNF398_7:149179697_G>A_4	GGACCTGGTGGGTTGGGTG	ZNF398_c.1825G>A_p.G609S
ZNF398_7:149179697_G>A_3	GACCTGGTGGGTTGGGTGG	ZNF398_c.1825G>A_p.G609S
ZNF398_7:149179697_G>A_2	ACCTGGTGGGTTGGGTGGC	ZNF398_c.1825G>A_p.G609S
ZNF398_7:149178903_C>T_6	TGTTCTCATGCCACCACTG	ZNF398_c.1031C>T_p.S344L
ZNF398_7:149178903_C>T_5	GTTCTCATGCCACCACTGT	ZNF398_c.1031C>T_p.S344L
ZNF398_7:149178903_C>T_4	TTCTCATGCCACCACTGTG	ZNF398_c.1031C>T_p.S344L
ZNF398_7:149178903_C>T_3	TCTCATGCCACCACTGTGG	ZNF398_c.1031C>T_p.S344L
ZNF398_7:149178903_C>T_2	CTCATGCCACCACTGTGGC	ZNF398_c.1031C>T_p.S344L
ZNF385B_2:179544828_C>T_6	TTAACACAGTGAGTAAATT	ZNF385B_c.395C>T_p.T132I
ZNF385B_2:179544828_C>T_5	TAACACAGTGAGTAAATTC	ZNF385B_c.395C>T_p.T132I
ZNF385B_2:179544828_C>T_4	AACACAGTGAGTAAATTCA	ZNF385B_c.395C>T_p.T132I
ZNF385B_2:179544828_C>T_3	ACACAGTGAGTAAATTCAT	ZNF385B_c.395C>T_p.T132I
ZNF385B_2:179544828_C>T_2	CACAGTGAGTAAATTCATT	ZNF385B_c.395C>T_p.T132I
ZNF384_12:6678696_C>T_6	TGTTCTCAGAGGTGGAGAA	ZNF384_c.319C>T_p.Q107*
ZNF384_12:6678696_C>T_5	GTTCTCAGAGGTGGAGAAG	ZNF384_c.319C>T_p.Q107*
ZNF384_12:6678696_C>T_4	TTCTCAGAGGTGGAGAAGA	ZNF384_c.319C>T_p.Q107*
ZNF384_12:6678696_C>T_3	TCTCAGAGGTGGAGAAGAG	ZNF384_c.319C>T_p.Q107*
ZNF384_12:6678696_C>T_2	CTCAGAGGTGGAGAAGAGA	ZNF384_c.319C>T_p.Q107*
ZNF365_10:62655628_C>T_6	TCAATTCAAGGTCATTTTT	ZNF365_c.388C>T_p.Q130*
ZNF365_10:62655628_C>T_5	CAATTCAAGGTCATTTTTG	ZNF365_c.388C>T_p.Q130*
ZNF365_10:62655628_C>T_4	AATTCAAGGTCATTTTTGG	ZNF365_c.388C>T_p.Q130*
ZNF365_10:62655628_C>T_3	ATTCAAGGTCATTTTTGGT	ZNF365_c.388C>T_p.Q130*
ZNF365_10:62655628_C>T_2	TTCAAGGTCATTTTTGGTT	ZNF365_c.388C>T_p.Q130*
ZNF341_20:33781374_C>T_6	CCTGCCCACACTGCCAGAA	ZNF341_c.1706C>T_p.P569L
ZNF341_20:33781374_C>T_5	CTGCCCACACTGCCAGAAG	ZNF341_c.1706C>T_p.P569L
ZNF341_20:33781374_C>T_4	TGCCCACACTGCCAGAAGG	ZNF341_c.1706C>T_p.P569L
ZNF341_20:33781374_C>T_3	GCCCACACTGCCAGAAGGT	ZNF341_c.1706C>T_p.P569L
ZNF341_20:33781374_C>T_2	CCCACACTGCCAGAAGGTG	ZNF341_c.1706C>T_p.P569L
ZNF329_19:58129346_C>T_6	CTTTAACTCTGGAGAAACC	ZNF329_c.158C>T_p.T53I
ZNF329_19:58129346_C>T_5	TTTAACTCTGGAGAAACCA	ZNF329_c.158C>T_p.T53I
ZNF329_19:58129346_C>T_4	TTAACTCTGGAGAAACCAG	ZNF329_c.158C>T_p.T53I
ZNF329_19:58129346_C>T_3	TAACTCTGGAGAAACCAGG	ZNF329_c.158C>T_p.T53I
ZNF329_19:58129346_C>T_2	AACTCTGGAGAAACCAGGG	ZNF329_c.158C>T_p.T53I
ZNF285_19:44386848_C>T_6	ATTTTGCGTATAGCTCTGT	ZNF285_c.1418C>T_p.A473V
ZNF285_19:44386848_C>T_5	TTTTGCGTATAGCTCTGTT	ZNF285_c.1418C>T_p.A473V
ZNF285_19:44386848_C>T_4	TTTGCGTATAGCTCTGTTC	ZNF285_c.1418C>T_p.A473V
ZNF285_19:44386848_C>T_3	TTGCGTATAGCTCTGTTCT	ZNF285_c.1418C>T_p.A473V
ZNF285_19:44386848_C>T_2	TGCGTATAGCTCTGTTCTT	ZNF285_c.1418C>T_p.A473V
ZNF285_19:44386492_G>A_6	TCTGCTCATGTAGTCTTTG	ZNF285_c.1774G>A_p.E592K
ZNF285_19:44386492_G>A_5	CTGCTCATGTAGTCTTTGA	ZNF285_c.1774G>A_p.E592K
ZNF285_19:44386492_G>A_4	TGCTCATGTAGTCTTTGAT	ZNF285_c.1774G>A_p.E592K
ZNF285_19:44386492_G>A_3	GCTCATGTAGTCTTTGATG	ZNF285_c.1774G>A_p.E592K
ZNF285_19:44386492_G>A_2	CTCATGTAGTCTTTGATGA	ZNF285_c.1774G>A_p.E592K
ZNF280C_X:130246876_C>T_6	CAAGTTCAAAACCAGCCAT	ZNF280C_c.161C>T_p.S54L
ZNF280C_X:130246876_C>T_5	AAGTTCAAAACCAGCCATT	ZNF280C_c.161C>T_p.S54L
ZNF280C_X:130246876_C>T_4	AGTTCAAAACCAGCCATTT	ZNF280C_c.161C>T_p.S54L
ZNF280C_X:130246876_C>T_3	GTTCAAAACCAGCCATTTC	ZNF280C_c.161C>T_p.S54L
ZNF280C_X:130246876_C>T_2	TTCAAAACCAGCCATTTCA	ZNF280C_c.161C>T_p.S54L
ZNF280C_X:130216091_G>A_6	GAAGCTCGAATAGTAACCT	ZNF280C_c.1538G>A_p.R513Q
ZNF280C_X:130216091_G>A_5	AAGCTCGAATAGTAACCTA	ZNF280C_c.1538G>A_p.R513Q
ZNF280C_X:130216091_G>A_4	AGCTCGAATAGTAACCTAT	ZNF280C_c.1538G>A_p.R513Q
ZNF280C_X:130216091_G>A_3	GCTCGAATAGTAACCTATA	ZNF280C_c.1538G>A_p.R513Q
ZNF280C_X:130216091_G>A_2	CTCGAATAGTAACCTATAA	ZNF280C_c.1538G>A_p.R513Q
ZNF266_19:9413990_C>T_6	AACTTACTGAACATTTAAA	ZNF266_c.935C>T_p.T312I
ZNF266_19:9413990_C>T_5	ACTTACTGAACATTTAAAA	ZNF266_c.935C>T_p.T312I
ZNF266_19:9413990_C>T_4	CTTACTGAACATTTAAAAA	ZNF266_c.935C>T_p.T312I
ZNF266_19:9413990_C>T_3	TTACTGAACATTTAAAAAC	ZNF266_c.935C>T_p.T312I
ZNF266_19:9413990_C>T_2	TACTGAACATTTAAAAACT	ZNF266_c.935C>T_p.T312I
ZNF232_17:5109674_C>T_6	ACTCTACCAGTCAAGAGAT	ZNF232_c.218C>T_p.T73I
ZNF232_17:5109674_C>T_5	CTCTACCAGTCAAGAGATC	ZNF232_c.218C>T_p.T73I
ZNF232_17:5109674_C>T_4	TCTACCAGTCAAGAGATCT	ZNF232_c.218C>T_p.T73I
ZNF232_17:5109674_C>T_3	CTACCAGTCAAGAGATCTT	ZNF232_c.218C>T_p.T73I
ZNF232_17:5109674_C>T_2	TACCAGTCAAGAGATCTTC	ZNF232_c.218C>T_p.T73I
ZNF226_19:44172935_G>A_6	TGTCTTCGGGTTGCTGTCG	ZNF226_c.218G>A_p.R73Q
ZNF226_19:44172935_G>A_5	GTCTTCGGGTTGCTGTCGT	ZNF226_c.218G>A_p.R73Q
ZNF226_19:44172935_G>A_4	TCTTCGGGTTGCTGTCGTC	ZNF226_c.218G>A_p.R73Q
ZNF226_19:44172935_G>A_3	CTTCGGGTTGCTGTCGTCA	ZNF226_c.218G>A_p.R73Q
ZNF226_19:44172935_G>A_2	TTCGGGTTGCTGTCGTCAT	ZNF226_c.218G>A_p.R73Q
ZNF217_20:53582478_C>T_6	ACAGAACCTCCCAAGGAAA	ZNF217_c.349C>T_p.P117S
ZNF217_20:53582478_C>T_5	CAGAACCTCCCAAGGAAAA	ZNF217_c.349C>T_p.P117S
ZNF217_20:53582478_C>T_4	AGAACCTCCCAAGGAAAAG	ZNF217_c.349C>T_p.P117S
ZNF217_20:53582478_C>T_3	GAACCTCCCAAGGAAAAGA	ZNF217_c.349C>T_p.P117S
ZNF217_20:53582478_C>T_2	AACCTCCCAAGGAAAAGAA	ZNF217_c.349C>T_p.P117S
ZNF212_7:149250681_G>A_6	TGGACACCTGGAATCACCA	ZNF212_c.415G>A_p.V139M
ZNF212_7:149250681_G>A_5	GGACACCTGGAATCACCAA	ZNF212_c.415G>A_p.V139M
ZNF212_7:149250681_G>A_4	GACACCTGGAATCACCAAT	ZNF212_c.415G>A_p.V139M
ZNF212_7:149250681_G>A_3	ACACCTGGAATCACCAATG	ZNF212_c.415G>A_p.V139M
ZNF212_7:149250681_G>A_2	CACCTGGAATCACCAATGG	ZNF212_c.415G>A_p.V139M
ZNF114_19:48286355_G>A_6	TTCTCTCGACCATGAGTGT	ZNF114_c.731G>A_p.R244Q
ZNF114_19:48286355_G>A_5	TCTCTCGACCATGAGTGTT	ZNF114_c.731G>A_p.R244Q
ZNF114_19:48286355_G>A_4	CTCTCGACCATGAGTGTTG	ZNF114_c.731G>A_p.R244Q
ZNF114_19:48286355_G>A_3	TCTCGACCATGAGTGTTGT	ZNF114_c.731G>A_p.R244Q
ZNF114_19:48286355_G>A_2	CTCGACCATGAGTGTTGTG	ZNF114_c.731G>A_p.R244Q
ZIC1_3:147410756_G>A_6	ATGTAGCGGAAGAAGGCGC	ZIC1_c.644G>A_p.R215H
ZIC1_3:147410756_G>A_5	TGTAGCGGAAGAAGGCGCC	ZIC1_c.644G>A_p.R215H
ZIC1_3:147410756_G>A_4	GTAGCGGAAGAAGGCGCCG	ZIC1_c.644G>A_p.R215H
ZIC1_3:147410756_G>A_3	TAGCGGAAGAAGGCGCCGG	ZIC1_c.644G>A_p.R215H
ZIC1_3:147410756_G>A_2	AGCGGAAGAAGGCGCCGGC	ZIC1_c.644G>A_p.R215H
ZGRF1_4:112584138_G>A_6	ATCGATCAGCTTTGGGTCC	ZGRF1_c.4138G>A_p.D1380N
ZGRF1_4:112584138_G>A_5	TCGATCAGCTTTGGGTCCA	ZGRF1_c.4138G>A_p.D1380N
ZGRF1_4:112584138_G>A_4	CGATCAGCTTTGGGTCCAT	ZGRF1_c.4138G>A_p.D1380N
ZGRF1_4:112584138_G>A_3	GATCAGCTTTGGGTCCATC	ZGRF1_c.4138G>A_p.D1380N
ZGRF1_4:112584138_G>A_2	ATCAGCTTTGGGTCCATCA	ZGRF1_c.4138G>A_p.D1380N
ZFYVE26_14:67793738_C>T_6	CCATGTCTGGCCGGAATGA	ZFYVE26_c.2423C>T_p.S808F
ZFYVE26_14:67793738_C>T_5	CATGTCTGGCCGGAATGAG	ZFYVE26_c.2423C>T_p.S808F
ZFYVE26_14:67793738_C>T_4	ATGTCTGGCCGGAATGAGC	ZFYVE26_c.2423C>T_p.S808F
ZFYVE26_14:67793738_C>T_3	TGTCTGGCCGGAATGAGCT	ZFYVE26_c.2423C>T_p.S808F
ZFYVE26_14:67793738_C>T_2	GTCTGGCCGGAATGAGCTG	ZFYVE26_c.2423C>T_p.S808F
ZFR_5:32390376_C>T_6	GATGATCGCCGCCGAATGC	ZFR_c.2041C>T_p.R681C
ZFR_5:32390376_C>T_5	ATGATCGCCGCCGAATGCC	ZFR_c.2041C>T_p.R681C
ZFR_5:32390376_C>T_4	TGATCGCCGCCGAATGCCA	ZFR_c.2041C>T_p.R681C
ZFR_5:32390376_C>T_3	GATCGCCGCCGAATGCCAG	ZFR_c.2041C>T_p.R681C
ZFR_5:32390376_C>T_2	ATCGCCGCCGAATGCCAGA	ZFR_c.2041C>T_p.R681C
ZFP91_11:58579613_C>T_6	AGAGTCCGCGACTCCTGTG	ZFP91_c.332C>T_p.P111L
ZFP91_11:58579613_C>T_5	GAGTCCGCGACTCCTGTGA	ZFP91_c.332C>T_p.P111L
ZFP91_11:58579613_C>T_4	AGTCCGCGACTCCTGTGAG	ZFP91_c.332C>T_p.P111L
ZFP91_11:58579613_C>T_3	GTCCGCGACTCCTGTGAGT	ZFP91_c.332C>T_p.P111L
ZFP91_11:58579613_C>T_2	TCCGCGACTCCTGTGAGTA	ZFP91_c.332C>T_p.P111L
ZFP42_4:188003253_G>A_6	TTCTTGCCTGTCATGTACT	ZFP42_c.446G>A_p.G149D
ZFP42_4:188003253_G>A_5	TCTTGCCTGTCATGTACTC	ZFP42_c.446G>A_p.G149D
ZFP42_4:188003253_G>A_4	CTTGCCTGTCATGTACTCA	ZFP42_c.446G>A_p.G149D
ZFP42_4:188003253_G>A_3	TTGCCTGTCATGTACTCAG	ZFP42_c.446G>A_p.G149D
ZFP42_4:188003253_G>A_2	TGCCTGTCATGTACTCAGA	ZFP42_c.446G>A_p.G149D
ZFHX4_8:76855596_C>T_6	ATGACCCGGATGACAACGC	ZFHX4_c.8675C>T_p.P2892L
ZFHX4_8:76855596_C>T_5	TGACCCGGATGACAACGCC	ZFHX4_c.8675C>T_p.P2892L
ZFHX4_8:76855596_C>T_4	GACCCGGATGACAACGCCG	ZFHX4_c.8675C>T_p.P2892L
ZFHX4_8:76855596_C>T_3	ACCCGGATGACAACGCCGA	ZFHX4_c.8675C>T_p.P2892L
ZFHX4_8:76855596_C>T_2	CCCGGATGACAACGCCGAC	ZFHX4_c.8675C>T_p.P2892L
ZFHX2_14:23525582_C>T_6	GTGATCCAGTACAATGAAG	ZFHX2_c.4360C>T_p.Q1454*
ZFHX2_14:23525582_C>T_5	TGATCCAGTACAATGAAGG	ZFHX2_c.4360C>T_p.Q1454*
ZFHX2_14:23525582_C>T_4	GATCCAGTACAATGAAGGG	ZFHX2_c.4360C>T_p.Q1454*
ZFHX2_14:23525582_C>T_3	ATCCAGTACAATGAAGGGA	ZFHX2_c.4360C>T_p.Q1454*
ZFHX2_14:23525582_C>T_2	TCCAGTACAATGAAGGGAA	ZFHX2_c.4360C>T_p.Q1454*
ZDHHC6_10:112442194_C>T_6	TATCATCGGGTAAGTGAAA	ZDHHC6_c.517C>T_p.R173W
ZDHHC6_10:112442194_C>T_5	ATCATCGGGTAAGTGAAAA	ZDHHC6_c.517C>T_p.R173W
ZDHHC6_10:112442194_C>T_4	TCATCGGGTAAGTGAAAAT	ZDHHC6_c.517C>T_p.R173W
ZDHHC6_10:112442194_C>T_3	CATCGGGTAAGTGAAAATG	ZDHHC6_c.517C>T_p.R173W
ZDHHC6_10:112442194_C>T_2	ATCGGGTAAGTGAAAATGA	ZDHHC6_c.517C>T_p.R173W
ZDBF2_2:206309756_C>T_6	GTGAACCGGATGGTTTTGA	ZDBF2_c.5228C>T_p.P1743L
ZDBF2_2:206309756_C>T_5	TGAACCGGATGGTTTTGAG	ZDBF2_c.5228C>T_p.P1743L
ZDBF2_2:206309756_C>T_4	GAACCGGATGGTTTTGAGA	ZDBF2_c.5228C>T_p.P1743L
ZDBF2_2:206309756_C>T_3	AACCGGATGGTTTTGAGAT	ZDBF2_c.5228C>T_p.P1743L
ZDBF2_2:206309756_C>T_2	ACCGGATGGTTTTGAGATG	ZDBF2_c.5228C>T_p.P1743L
ZCWPW1_7:100416359_C>T_6	CCTGCACCCTCTAAGAAGA	ZCWPW1_c.577C>T_p.P193S
ZCWPW1_7:100416359_C>T_5	CTGCACCCTCTAAGAAGAA	ZCWPW1_c.577C>T_p.P193S
ZCWPW1_7:100416359_C>T_4	TGCACCCTCTAAGAAGAAA	ZCWPW1_c.577C>T_p.P193S
ZCWPW1_7:100416359_C>T_3	GCACCCTCTAAGAAGAAAT	ZCWPW1_c.577C>T_p.P193S
ZCWPW1_7:100416359_C>T_2	CACCCTCTAAGAAGAAATC	ZCWPW1_c.577C>T_p.P193S
ZC3H7B_22:41346161_G>A_6	GCTTGGCGATGGTGAGGCT	ZC3H7B_c.1618G>A_p.A540T
ZC3H7B_22:41346161_G>A_5	CTTGGCGATGGTGAGGCTG	ZC3H7B_c.1618G>A_p.A540T
ZC3H7B_22:41346161_G>A_4	TTGGCGATGGTGAGGCTGC	ZC3H7B_c.1618G>A_p.A540T
ZC3H7B_22:41346161_G>A_3	TGGCGATGGTGAGGCTGCC	ZC3H7B_c.1618G>A_p.A540T
ZC3H7B_22:41346161_G>A_2	GGCGATGGTGAGGCTGCCG	ZC3H7B_c.1618G>A_p.A540T
ZC3H12D_6:149474408_C>T_6	GGCAGCCGCCCGGGTGCCC	ZC3H12D_c.136C>T_p.R46C
ZC3H12D_6:149474408_C>T_5	GCAGCCGCCCGGGTGCCCT	ZC3H12D_c.136C>T_p.R46C
ZC3H12D_6:149474408_C>T_4	CAGCCGCCCGGGTGCCCTG	ZC3H12D_c.136C>T_p.R46C
ZC3H12D_6:149474408_C>T_3	AGCCGCCCGGGTGCCCTGG	ZC3H12D_c.136C>T_p.R46C
ZC3H12D_6:149474408_C>T_2	GCCGCCCGGGTGCCCTGGA	ZC3H12D_c.136C>T_p.R46C
ZBTB5_9:37441422_G>A_6	AAACTCCGATCACTGCTTT	ZBTB5_c.1130G>A_p.R377Q
ZBTB5_9:37441422_G>A_5	AACTCCGATCACTGCTTTC	ZBTB5_c.1130G>A_p.R377Q
ZBTB5_9:37441422_G>A_4	ACTCCGATCACTGCTTTCA	ZBTB5_c.1130G>A_p.R377Q
ZBTB5_9:37441422_G>A_3	CTCCGATCACTGCTTTCAG	ZBTB5_c.1130G>A_p.R377Q
ZBTB5_9:37441422_G>A_2	TCCGATCACTGCTTTCAGG	ZBTB5_c.1130G>A_p.R377Q
YLPM1_14:74798566_G>A_6	TTCTCCCGACTGCTTCCAG	YLPM1_c.3269G>A_p.R1090Q
YLPM1_14:74798566_G>A_5	TCTCCCGACTGCTTCCAGG	YLPM1_c.3269G>A_p.R1090Q
YLPM1_14:74798566_G>A_4	CTCCCGACTGCTTCCAGGC	YLPM1_c.3269G>A_p.R1090Q
YLPM1_14:74798566_G>A_3	TCCCGACTGCTTCCAGGCC	YLPM1_c.3269G>A_p.R1090Q
YLPM1_14:74798566_G>A_2	CCCGACTGCTTCCAGGCCT	YLPM1_c.3269G>A_p.R1090Q
XPNPEP3_22:40926377_C>T_6	TCCTTTCTGCAGACTGTCC	XPNPEP3_c.1466C>T_p.S489F
XPNPEP3_22:40926377_C>T_5	CCTTTCTGCAGACTGTCCC	XPNPEP3_c.1466C>T_p.S489F
XPNPEP3_22:40926377_C>T_4	CTTTCTGCAGACTGTCCCA	XPNPEP3_c.1466C>T_p.S489F
XPNPEP3_22:40926377_C>T_3	TTTCTGCAGACTGTCCCAA	XPNPEP3_c.1466C>T_p.S489F
XPNPEP3_22:40926377_C>T_2	TTCTGCAGACTGTCCCAAA	XPNPEP3_c.1466C>T_p.S489F
XKR6_8:11200676_G>A_6	CCCTCACGCCTGGGCCACC	XKR6_c.664G>A_p.V222M
XKR6_8:11200676_G>A_5	CCTCACGCCTGGGCCACCG	XKR6_c.664G>A_p.V222M
XKR6_8:11200676_G>A_4	CTCACGCCTGGGCCACCGC	XKR6_c.664G>A_p.V222M
XKR6_8:11200676_G>A_3	TCACGCCTGGGCCACCGCG	XKR6_c.664G>A_p.V222M
XKR6_8:11200676_G>A_2	CACGCCTGGGCCACCGCGG	XKR6_c.664G>A_p.V222M
WWP2_16:69939081_G>A_6	AGGTACCGGTGACAAACTG	WWP2_c.2398G>A_p.G800S
WWP2_16:69939081_G>A_5	GGTACCGGTGACAAACTGC	WWP2_c.2398G>A_p.G800S
WWP2_16:69939081_G>A_4	GTACCGGTGACAAACTGCA	WWP2_c.2398G>A_p.G800S
WWP2_16:69939081_G>A_3	TACCGGTGACAAACTGCAG	WWP2_c.2398G>A_p.G800S
WWP2_16:69939081_G>A_2	ACCGGTGACAAACTGCAGC	WWP2_c.2398G>A_p.G800S
WNK2_9:93290009_G>A_6	ACGGCCCCTCGAGTGGGGG	WNK2_c.5009G>A_p.G1670E
WNK2_9:93290009_G>A_5	CGGCCCCTCGAGTGGGGGC	WNK2_c.5009G>A_p.G1670E
WNK2_9:93290009_G>A_4	GGCCCCTCGAGTGGGGGCC	WNK2_c.5009G>A_p.G1670E
WNK2_9:93290009_G>A_3	GCCCCTCGAGTGGGGGCCA	WNK2_c.5009G>A_p.G1670E
WNK2_9:93290009_G>A_2	CCCCTCGAGTGGGGGCCAG	WNK2_c.5009G>A_p.G1670E
WDR88_19:33132425_G>A_6	CCTGGTCGCCCCAGATCAA	WDR88_c.256G>A_p.D86N
WDR88_19:33132425_G>A_5	CTGGTCGCCCCAGATCAAT	WDR88_c.256G>A_p.D86N
WDR88_19:33132425_G>A_4	TGGTCGCCCCAGATCAATT	WDR88_c.256G>A_p.D86N
WDR88_19:33132425_G>A_3	GGTCGCCCCAGATCAATTT	WDR88_c.256G>A_p.D86N
WDR88_19:33132425_G>A_2	GTCGCCCCAGATCAATTTC	WDR88_c.256G>A_p.D86N
WDR81_17:1726467_G>A_6	ATGGAGCGGAAGATAGAGG	WDR81_c.1508G>A_p.R503H
WDR81_17:1726467_G>A_5	TGGAGCGGAAGATAGAGGG	WDR81_c.1508G>A_p.R503H
WDR81_17:1726467_G>A_4	GGAGCGGAAGATAGAGGGA	WDR81_c.1508G>A_p.R503H
WDR81_17:1726467_G>A_3	GAGCGGAAGATAGAGGGAT	WDR81_c.1508G>A_p.R503H
WDR81_17:1726467_G>A_2	AGCGGAAGATAGAGGGATC	WDR81_c.1508G>A_p.R503H
WDR72_15:53615733_C>T_6	AAGCTTCAGGGTCCTATTT	WDR72_c.2473C>T_p.Q825*
WDR72_15:53615733_C>T_5	AGCTTCAGGGTCCTATTTC	WDR72_c.2473C>T_p.Q825*
WDR72_15:53615733_C>T_4	GCTTCAGGGTCCTATTTCT	WDR72_c.2473C>T_p.Q825*
WDR72_15:53615733_C>T_3	CTTCAGGGTCCTATTTCTT	WDR72_c.2473C>T_p.Q825*
WDR72_15:53615733_C>T_2	TTCAGGGTCCTATTTCTTT	WDR72_c.2473C>T_p.Q825*
WDR64_1:241671162_G>A_6	AAAATTCGCCTTTTTCTAG	WDR64_c.365G>A_p.R122Q
WDR64_1:241671162_G>A_5	AAATTCGCCTTTTTCTAGA	WDR64_c.365G>A_p.R122Q
WDR64_1:241671162_G>A_4	AATTCGCCTTTTTCTAGAC	WDR64_c.365G>A_p.R122Q
WDR64_1:241671162_G>A_3	ATTCGCCTTTTTCTAGACA	WDR64_c.365G>A_p.R122Q
WDR64_1:241671162_G>A_2	TTCGCCTTTTTCTAGACAC	WDR64_c.365G>A_p.R122Q
WDR59_16:74887745_C>T_6	GCTTTACCTCTTCTGGTTC	WDR59_c.2357C>T_p.T786I
WDR59_16:74887745_C>T_5	CTTTACCTCTTCTGGTTCC	WDR59_c.2357C>T_p.T786I
WDR59_16:74887745_C>T_4	TTTACCTCTTCTGGTTCCT	WDR59_c.2357C>T_p.T786I
WDR59_16:74887745_C>T_3	TTACCTCTTCTGGTTCCTG	WDR59_c.2357C>T_p.T786I
WDR59_16:74887745_C>T_2	TACCTCTTCTGGTTCCTGC	WDR59_c.2357C>T_p.T786I
WDR34_9:128635196_G>A_6	CCTTCCCGTCGGTGGCCAC	WDR34_c.877G>A_p.G293R
WDR34_9:128635196_G>A_5	CTTCCCGTCGGTGGCCACA	WDR34_c.877G>A_p.G293R
WDR34_9:128635196_G>A_4	TTCCCGTCGGTGGCCACAC	WDR34_c.877G>A_p.G293R
WDR34_9:128635196_G>A_3	TCCCGTCGGTGGCCACACT	WDR34_c.877G>A_p.G293R
WDR34_9:128635196_G>A_2	CCCGTCGGTGGCCACACTC	WDR34_c.877G>A_p.G293R
WDFY3_4:84739084_G>A_6	GTCATGCGGGCTTCTGCTT	WDFY3_c.6500G>A_p.R2167H
WDFY3_4:84739084_G>A_5	TCATGCGGGCTTCTGCTTC	WDFY3_c.6500G>A_p.R2167H
WDFY3_4:84739084_G>A_4	CATGCGGGCTTCTGCTTCC	WDFY3_c.6500G>A_p.R2167H
WDFY3_4:84739084_G>A_3	ATGCGGGCTTCTGCTTCCA	WDFY3_c.6500G>A_p.R2167H
WDFY3_4:84739084_G>A_2	TGCGGGCTTCTGCTTCCAG	WDFY3_c.6500G>A_p.R2167H
VWDE_7:12383539_G>A_6	TACGAACACAATCACCTCC	VWDE_c.538G>A_p.V180I
VWDE_7:12383539_G>A_5	ACGAACACAATCACCTCCT	VWDE_c.538G>A_p.V180I
VWDE_7:12383539_G>A_4	CGAACACAATCACCTCCTG	VWDE_c.538G>A_p.V180I
VWDE_7:12383539_G>A_3	GAACACAATCACCTCCTGT	VWDE_c.538G>A_p.V180I
VWDE_7:12383539_G>A_2	AACACAATCACCTCCTGTT	VWDE_c.538G>A_p.V180I
VWA5A_11:124124258_G>A_6	TAACTTCTCCATCTGTAAA	VWA5A_c.1186G>A_p.E396K
VWA5A_11:124124258_G>A_5	AACTTCTCCATCTGTAAAG	VWA5A_c.1186G>A_p.E396K
VWA5A_11:124124258_G>A_4	ACTTCTCCATCTGTAAAGA	VWA5A_c.1186G>A_p.E396K
VWA5A_11:124124258_G>A_3	CTTCTCCATCTGTAAAGAC	VWA5A_c.1186G>A_p.E396K
VWA5A_11:124124258_G>A_2	TTCTCCATCTGTAAAGACA	VWA5A_c.1186G>A_p.E396K
VWA5A_11:124123720_G>A_6	GGCCTGCATAAGCTTCACT	VWA5A_c.1080G>A_p.M360I
VWA5A_11:124123720_G>A_5	GCCTGCATAAGCTTCACTC	VWA5A_c.1080G>A_p.M360I
VWA5A_11:124123720_G>A_4	CCTGCATAAGCTTCACTCT	VWA5A_c.1080G>A_p.M360I
VWA5A_11:124123720_G>A_3	CTGCATAAGCTTCACTCTC	VWA5A_c.1080G>A_p.M360I
VWA5A_11:124123720_G>A_2	TGCATAAGCTTCACTCTCC	VWA5A_c.1080G>A_p.M360I
VWA3A_16:22140211_C>T_6	AAATGGCGTCCACTCAGTA	VWA3A_c.2350C>T_p.R784C
VWA3A_16:22140211_C>T_5	AATGGCGTCCACTCAGTAG	VWA3A_c.2350C>T_p.R784C
VWA3A_16:22140211_C>T_4	ATGGCGTCCACTCAGTAGC	VWA3A_c.2350C>T_p.R784C
VWA3A_16:22140211_C>T_3	TGGCGTCCACTCAGTAGCA	VWA3A_c.2350C>T_p.R784C
VWA3A_16:22140211_C>T_2	GGCGTCCACTCAGTAGCAG	VWA3A_c.2350C>T_p.R784C
VTI1A_10:112815369_G>A_6	TTCTGACAGAAAAAGTGAT	VTI1A_c.640G>A_p.V214I
VTI1A_10:112815369_G>A_5	TCTGACAGAAAAAGTGATC	VTI1A_c.640G>A_p.V214I
VTI1A_10:112815369_G>A_4	CTGACAGAAAAAGTGATCG	VTI1A_c.640G>A_p.V214I
VTI1A_10:112815369_G>A_3	TGACAGAAAAAGTGATCGC	VTI1A_c.640G>A_p.V214I
VTI1A_10:112815369_G>A_2	GACAGAAAAAGTGATCGCC	VTI1A_c.640G>A_p.V214I
VSTM1_19:54058715_G>A_6	CATCTTCGTAGCCCAGACA	VSTM1_c.52G>A_p.E18K
VSTM1_19:54058715_G>A_5	ATCTTCGTAGCCCAGACAC	VSTM1_c.52G>A_p.E18K
VSTM1_19:54058715_G>A_4	TCTTCGTAGCCCAGACACA	VSTM1_c.52G>A_p.E18K
VSTM1_19:54058715_G>A_3	CTTCGTAGCCCAGACACAG	VSTM1_c.52G>A_p.E18K
VSTM1_19:54058715_G>A_2	TTCGTAGCCCAGACACAGC	VSTM1_c.52G>A_p.E18K
VSIG4_X:66033827_G>A_6	ATGGGACGGCCTGAAGAGG	VSIG4_c.59G>A_p.R20H
VSIG4_X:66033827_G>A_5	TGGGACGGCCTGAAGAGGC	VSIG4_c.59G>A_p.R20H
VSIG4_X:66033827_G>A_4	GGGACGGCCTGAAGAGGCG	VSIG4_c.59G>A_p.R20H
VSIG4_X:66033827_G>A_3	GGACGGCCTGAAGAGGCGG	VSIG4_c.59G>A_p.R20H
VSIG4_X:66033827_G>A_2	GACGGCCTGAAGAGGCGGA	VSIG4_c.59G>A_p.R20H
VRK3_19:49988475_G>A_6	GGAGGTCGCTGCGGCGGGA	VRK3_c.1114G>A_p.D372N
VRK3_19:49988475_G>A_5	GAGGTCGCTGCGGCGGGAG	VRK3_c.1114G>A_p.D372N
VRK3_19:49988475_G>A_4	AGGTCGCTGCGGCGGGAGG	VRK3_c.1114G>A_p.D372N
VRK3_19:49988475_G>A_3	GGTCGCTGCGGCGGGAGGG	VRK3_c.1114G>A_p.D372N
VRK3_19:49988475_G>A_2	GTCGCTGCGGCGGGAGGGC	VRK3_c.1114G>A_p.D372N
VPS51_11:65108556_G>A_6	TCACCACCACCCTGCTCCT	VPS51_c.1085G>A_p.G362D
VPS51_11:65108556_G>A_5	CACCACCACCCTGCTCCTG	VPS51_c.1085G>A_p.G362D
VPS51_11:65108556_G>A_4	ACCACCACCCTGCTCCTGC	VPS51_c.1085G>A_p.G362D
VPS51_11:65108556_G>A_3	CCACCACCCTGCTCCTGCG	VPS51_c.1085G>A_p.G362D
VPS51_11:65108556_G>A_2	CACCACCCTGCTCCTGCGC	VPS51_c.1085G>A_p.G362D
VPS16_20:2864371_C>T_6	TGTTCACGGTGTTGCTGCA	VPS16_c.1727C>T_p.T576M
VPS16_20:2864371_C>T_5	GTTCACGGTGTTGCTGCAC	VPS16_c.1727C>T_p.T576M
VPS16_20:2864371_C>T_4	TTCACGGTGTTGCTGCACC	VPS16_c.1727C>T_p.T576M
VPS16_20:2864371_C>T_3	TCACGGTGTTGCTGCACCT	VPS16_c.1727C>T_p.T576M
VPS16_20:2864371_C>T_2	CACGGTGTTGCTGCACCTG	VPS16_c.1727C>T_p.T576M
VPS13D_1:12400259_G>A_6	CGGTCTCGATGACCTCATT	VPS13D_c.11713G>A_p.E3905K
VPS13D_1:12400259_G>A_5	GGTCTCGATGACCTCATTC	VPS13D_c.11713G>A_p.E3905K
VPS13D_1:12400259_G>A_4	GTCTCGATGACCTCATTCT	VPS13D_c.11713G>A_p.E3905K
VPS13D_1:12400259_G>A_3	TCTCGATGACCTCATTCTC	VPS13D_c.11713G>A_p.E3905K
VPS13D_1:12400259_G>A_2	CTCGATGACCTCATTCTCA	VPS13D_c.11713G>A_p.E3905K
VPS13B_8:99859402_G>A_6	TCAGCCCCTCATACGGAAG	VPS13B_c.11041G>A_p.G3681R
VPS13B_8:99859402_G>A_5	CAGCCCCTCATACGGAAGC	VPS13B_c.11041G>A_p.G3681R
VPS13B_8:99859402_G>A_4	AGCCCCTCATACGGAAGCC	VPS13B_c.11041G>A_p.G3681R
VPS13B_8:99859402_G>A_3	GCCCCTCATACGGAAGCCT	VPS13B_c.11041G>A_p.G3681R
VPS13B_8:99859402_G>A_2	CCCCTCATACGGAAGCCTG	VPS13B_c.11041G>A_p.G3681R
VHL_3:10142131_C>T_6	GCGAGCCGCAGCCCTACCC	VHL_c.284C>T_p.P95L
VHL_3:10142131_C>T_5	CGAGCCGCAGCCCTACCCA	VHL_c.284C>T_p.P95L
VHL_3:10142131_C>T_4	GAGCCGCAGCCCTACCCAA	VHL_c.284C>T_p.P95L
VHL_3:10142131_C>T_3	AGCCGCAGCCCTACCCAAC	VHL_c.284C>T_p.P95L
VHL_3:10142131_C>T_2	GCCGCAGCCCTACCCAACG	VHL_c.284C>T_p.P95L
VCAN_5:83537795_G>A_6	CTTCTTCCTCTGAAACATA	VCAN_c.4792G>A_p.E1598K
VCAN_5:83537795_G>A_5	TTCTTCCTCTGAAACATAT	VCAN_c.4792G>A_p.E1598K
VCAN_5:83537795_G>A_4	TCTTCCTCTGAAACATATG	VCAN_c.4792G>A_p.E1598K
VCAN_5:83537795_G>A_3	CTTCCTCTGAAACATATGC	VCAN_c.4792G>A_p.E1598K
VCAN_5:83537795_G>A_2	TTCCTCTGAAACATATGCT	VCAN_c.4792G>A_p.E1598K
UTRN_6:144514728_C>T_6	AATGCCCGTGGAAGCTCAA	UTRN_c.5152C>T_p.R1718C
UTRN_6:144514728_C>T_5	ATGCCCGTGGAAGCTCAAG	UTRN_c.5152C>T_p.R1718C
UTRN_6:144514728_C>T_4	TGCCCGTGGAAGCTCAAGC	UTRN_c.5152C>T_p.R1718C
UTRN_6:144514728_C>T_3	GCCCGTGGAAGCTCAAGCA	UTRN_c.5152C>T_p.R1718C
UTRN_6:144514728_C>T_2	CCCGTGGAAGCTCAAGCAG	UTRN_c.5152C>T_p.R1718C
UTRN_6:144482366_G>A_6	TTTCCTCGAATTCTATTAC	UTRN_c.3665G>A_p.R1222Q
UTRN_6:144482366_G>A_5	TTCCTCGAATTCTATTACA	UTRN_c.3665G>A_p.R1222Q
UTRN_6:144482366_G>A_4	TCCTCGAATTCTATTACAA	UTRN_c.3665G>A_p.R1222Q
UTRN_6:144482366_G>A_3	CCTCGAATTCTATTACAAA	UTRN_c.3665G>A_p.R1222Q
UTRN_6:144482366_G>A_2	CTCGAATTCTATTACAAAG	UTRN_c.3665G>A_p.R1222Q
USP35_11:78208884_C>T_6	AACTTCCTCTCCGCATCCT	USP35_c.1513C>T_p.L505F
USP35_11:78208884_C>T_5	ACTTCCTCTCCGCATCCTG	USP35_c.1513C>T_p.L505F
USP35_11:78208884_C>T_4	CTTCCTCTCCGCATCCTGG	USP35_c.1513C>T_p.L505F
USP35_11:78208884_C>T_3	TTCCTCTCCGCATCCTGGA	USP35_c.1513C>T_p.L505F
USP35_11:78208884_C>T_2	TCCTCTCCGCATCCTGGAC	USP35_c.1513C>T_p.L505F
USP32_17:60208181_C>T_6	CCTGTACGGTATGGACTAA	USP32_c.2803C>T_p.R935W
USP32_17:60208181_C>T_5	CTGTACGGTATGGACTAAG	USP32_c.2803C>T_p.R935W
USP32_17:60208181_C>T_4	TGTACGGTATGGACTAAGA	USP32_c.2803C>T_p.R935W
USP32_17:60208181_C>T_3	GTACGGTATGGACTAAGAC	USP32_c.2803C>T_p.R935W
USP32_17:60208181_C>T_2	TACGGTATGGACTAAGACT	USP32_c.2803C>T_p.R935W
USP25_21:15825037_C>T_6	ACCTCACGGTATTACAACA	USP25_c.1280C>T_p.T427M
USP25_21:15825037_C>T_5	CCTCACGGTATTACAACAA	USP25_c.1280C>T_p.T427M
USP25_21:15825037_C>T_4	CTCACGGTATTACAACAAA	USP25_c.1280C>T_p.T427M
USP25_21:15825037_C>T_3	TCACGGTATTACAACAAAG	USP25_c.1280C>T_p.T427M
USP25_21:15825037_C>T_2	CACGGTATTACAACAAAGG	USP25_c.1280C>T_p.T427M
USP19_3:49108494_C>T_6	TGGCCCCCACGCGGACAGC	USP19_c.3884C>T_p.P1295L
USP19_3:49108494_C>T_5	GGCCCCCACGCGGACAGCC	USP19_c.3884C>T_p.P1295L
USP19_3:49108494_C>T_4	GCCCCCACGCGGACAGCCC	USP19_c.3884C>T_p.P1295L
USP19_3:49108494_C>T_3	CCCCCACGCGGACAGCCCC	USP19_c.3884C>T_p.P1295L
USP19_3:49108494_C>T_2	CCCCACGCGGACAGCCCCT	USP19_c.3884C>T_p.P1295L
USH2A_1:216246767_G>A_6	CGAAGACCTGTTACCCCTA	USH2A_c.2627G>A_p.G876D
USH2A_1:216246767_G>A_5	GAAGACCTGTTACCCCTAA	USH2A_c.2627G>A_p.G876D
USH2A_1:216246767_G>A_4	AAGACCTGTTACCCCTAAT	USH2A_c.2627G>A_p.G876D
USH2A_1:216246767_G>A_3	AGACCTGTTACCCCTAATT	USH2A_c.2627G>A_p.G876D
USH2A_1:216246767_G>A_2	GACCTGTTACCCCTAATTT	USH2A_c.2627G>A_p.G876D
UPP1_7:48107370_G>A_6	TCCAGACGGCCTTGCCCTG	UPP1_c.656G>A_p.R219H
UPP1_7:48107370_G>A_5	CCAGACGGCCTTGCCCTGA	UPP1_c.656G>A_p.R219H
UPP1_7:48107370_G>A_4	CAGACGGCCTTGCCCTGAG	UPP1_c.656G>A_p.R219H
UPP1_7:48107370_G>A_3	AGACGGCCTTGCCCTGAGG	UPP1_c.656G>A_p.R219H
UPP1_7:48107370_G>A_2	GACGGCCTTGCCCTGAGGC	UPP1_c.656G>A_p.R219H
UPK3BL1_7:102639134_G>A_6	TGCAGGCGAGTGTCGCTGG	UPK3BL1_c.551G>A_p.R184H
UPK3BL1_7:102639134_G>A_5	GCAGGCGAGTGTCGCTGGA	UPK3BL1_c.551G>A_p.R184H
UPK3BL1_7:102639134_G>A_4	CAGGCGAGTGTCGCTGGAC	UPK3BL1_c.551G>A_p.R184H
UPK3BL1_7:102639134_G>A_3	AGGCGAGTGTCGCTGGACC	UPK3BL1_c.551G>A_p.R184H
UPK3BL1_7:102639134_G>A_2	GGCGAGTGTCGCTGGACCA	UPK3BL1_c.551G>A_p.R184H
UPK3A_22:45293225_G>A_6	TGCCTCCGCTCCGCCGGCC	UPK3A_c.616G>A_p.G206R
UPK3A_22:45293225_G>A_5	GCCTCCGCTCCGCCGGCCT	UPK3A_c.616G>A_p.G206R
UPK3A_22:45293225_G>A_4	CCTCCGCTCCGCCGGCCTG	UPK3A_c.616G>A_p.G206R
UPK3A_22:45293225_G>A_3	CTCCGCTCCGCCGGCCTGG	UPK3A_c.616G>A_p.G206R
UPK3A_22:45293225_G>A_2	TCCGCTCCGCCGGCCTGGC	UPK3A_c.616G>A_p.G206R
UNKL_16:1390670_G>A_6	CACCCTCGGCCGGCGAGTC	UNKL_c.1048G>A_p.E350K
UNKL_16:1390670_G>A_5	ACCCTCGGCCGGCGAGTCT	UNKL_c.1048G>A_p.E350K
UNKL_16:1390670_G>A_4	CCCTCGGCCGGCGAGTCTC	UNKL_c.1048G>A_p.E350K
UNKL_16:1390670_G>A_3	CCTCGGCCGGCGAGTCTCT	UNKL_c.1048G>A_p.E350K
UNKL_16:1390670_G>A_2	CTCGGCCGGCGAGTCTCTC	UNKL_c.1048G>A_p.E350K
UNC5C_4:95278306_G>A_6	AGACTTCCTGTTCCAAAGA	UNC5C_c.547G>A_p.E183K
UNC5C_4:95278306_G>A_5	GACTTCCTGTTCCAAAGAC	UNC5C_c.547G>A_p.E183K
UNC5C_4:95278306_G>A_4	ACTTCCTGTTCCAAAGACA	UNC5C_c.547G>A_p.E183K
UNC5C_4:95278306_G>A_3	CTTCCTGTTCCAAAGACAC	UNC5C_c.547G>A_p.E183K
UNC5C_4:95278306_G>A_2	TTCCTGTTCCAAAGACACT	UNC5C_c.547G>A_p.E183K
UNC45B_17:35180623_C>T_6	CATGATCAGCTGCGGCAGG	UNC45B_c.2326C>T_p.Q776*
UNC45B_17:35180623_C>T_5	ATGATCAGCTGCGGCAGGC	UNC45B_c.2326C>T_p.Q776*
UNC45B_17:35180623_C>T_4	TGATCAGCTGCGGCAGGCG	UNC45B_c.2326C>T_p.Q776*
UNC45B_17:35180623_C>T_3	GATCAGCTGCGGCAGGCGG	UNC45B_c.2326C>T_p.Q776*
UNC45B_17:35180623_C>T_2	ATCAGCTGCGGCAGGCGGC	UNC45B_c.2326C>T_p.Q776*
UNC13B_9:35353171_G>A_6	CACATTCCTCCTCTTCATT	UNC13B_c.1645G>A_p.E549K
UNC13B_9:35353171_G>A_5	ACATTCCTCCTCTTCATTC	UNC13B_c.1645G>A_p.E549K
UNC13B_9:35353171_G>A_4	CATTCCTCCTCTTCATTCA	UNC13B_c.1645G>A_p.E549K
UNC13B_9:35353171_G>A_3	ATTCCTCCTCTTCATTCAG	UNC13B_c.1645G>A_p.E549K
UNC13B_9:35353171_G>A_2	TTCCTCCTCTTCATTCAGG	UNC13B_c.1645G>A_p.E549K
UNC13B_9:35351873_G>A_6	TGGTTCCTCTCTGAGGGCT	UNC13B_c.347G>A_p.R116K
UNC13B_9:35351873_G>A_5	GGTTCCTCTCTGAGGGCTC	UNC13B_c.347G>A_p.R116K
UNC13B_9:35351873_G>A_4	GTTCCTCTCTGAGGGCTCC	UNC13B_c.347G>A_p.R116K
UNC13B_9:35351873_G>A_3	TTCCTCTCTGAGGGCTCCT	UNC13B_c.347G>A_p.R116K
UNC13B_9:35351873_G>A_2	TCCTCTCTGAGGGCTCCTG	UNC13B_c.347G>A_p.R116K
UNC13A_19:17647402_G>A_6	TTGTTGCGCTCCCGGATCT	UNC13A_c.1907G>A_p.R636H
UNC13A_19:17647402_G>A_5	TGTTGCGCTCCCGGATCTT	UNC13A_c.1907G>A_p.R636H
UNC13A_19:17647402_G>A_4	GTTGCGCTCCCGGATCTTC	UNC13A_c.1907G>A_p.R636H
UNC13A_19:17647402_G>A_3	TTGCGCTCCCGGATCTTCA	UNC13A_c.1907G>A_p.R636H
UNC13A_19:17647402_G>A_2	TGCGCTCCCGGATCTTCAT	UNC13A_c.1907G>A_p.R636H
UMPS_3:124730614_G>A_6	AGAAGACGCGGTCGAGACA	UMPS_c.143G>A_p.R48H
UMPS_3:124730614_G>A_5	GAAGACGCGGTCGAGACAC	UMPS_c.143G>A_p.R48H
UMPS_3:124730614_G>A_4	AAGACGCGGTCGAGACACG	UMPS_c.143G>A_p.R48H
UMPS_3:124730614_G>A_3	AGACGCGGTCGAGACACGA	UMPS_c.143G>A_p.R48H
UMPS_3:124730614_G>A_2	GACGCGGTCGAGACACGAT	UMPS_c.143G>A_p.R48H
UMODL1_21:42084218_C>T_6	GGGGGGCGCTACTGCATGG	UMODL1_c.454C>T_p.R152C
UMODL1_21:42084218_C>T_5	GGGGGCGCTACTGCATGGC	UMODL1_c.454C>T_p.R152C
UMODL1_21:42084218_C>T_4	GGGGCGCTACTGCATGGCC	UMODL1_c.454C>T_p.R152C
UMODL1_21:42084218_C>T_3	GGGCGCTACTGCATGGCCC	UMODL1_c.454C>T_p.R152C
UMODL1_21:42084218_C>T_2	GGCGCTACTGCATGGCCCC	UMODL1_c.454C>T_p.R152C
UHRF1BP1_6:34855674_C>T_6	AGATGGCGTTTGACTATTA	UHRF1BP1_c.1091C>T_p.A364V
UHRF1BP1_6:34855674_C>T_5	GATGGCGTTTGACTATTAC	UHRF1BP1_c.1091C>T_p.A364V
UHRF1BP1_6:34855674_C>T_4	ATGGCGTTTGACTATTACC	UHRF1BP1_c.1091C>T_p.A364V
UHRF1BP1_6:34855674_C>T_3	TGGCGTTTGACTATTACCC	UHRF1BP1_c.1091C>T_p.A364V
UHRF1BP1_6:34855674_C>T_2	GGCGTTTGACTATTACCCT	UHRF1BP1_c.1091C>T_p.A364V
UGT2B7_4:69112551_C>T_6	GTCATGCGCCACAAAGGAG	UGT2B7_c.1405C>T_p.R469C
UGT2B7_4:69112551_C>T_5	TCATGCGCCACAAAGGAGC	UGT2B7_c.1405C>T_p.R469C
UGT2B7_4:69112551_C>T_4	CATGCGCCACAAAGGAGCT	UGT2B7_c.1405C>T_p.R469C
UGT2B7_4:69112551_C>T_3	ATGCGCCACAAAGGAGCTA	UGT2B7_c.1405C>T_p.R469C
UGT2B7_4:69112551_C>T_2	TGCGCCACAAAGGAGCTAA	UGT2B7_c.1405C>T_p.R469C
UBR5_8:102329176_G>A_6	ATGTTGCTCGTGGATGATG	UBR5_c.1240G>A_p.A414T
UBR5_8:102329176_G>A_5	TGTTGCTCGTGGATGATGT	UBR5_c.1240G>A_p.A414T
UBR5_8:102329176_G>A_4	GTTGCTCGTGGATGATGTA	UBR5_c.1240G>A_p.A414T
UBR5_8:102329176_G>A_3	TTGCTCGTGGATGATGTAA	UBR5_c.1240G>A_p.A414T
UBR5_8:102329176_G>A_2	TGCTCGTGGATGATGTAAT	UBR5_c.1240G>A_p.A414T
UBR5_8:102293713_C>T_6	GTCCAACTGCACCATTTAC	UBR5_c.4481C>T_p.T1494I
UBR5_8:102293713_C>T_5	TCCAACTGCACCATTTACC	UBR5_c.4481C>T_p.T1494I
UBR5_8:102293713_C>T_4	CCAACTGCACCATTTACCC	UBR5_c.4481C>T_p.T1494I
UBR5_8:102293713_C>T_3	CAACTGCACCATTTACCCT	UBR5_c.4481C>T_p.T1494I
UBR5_8:102293713_C>T_2	AACTGCACCATTTACCCTG	UBR5_c.4481C>T_p.T1494I
UBR2_6:42635436_C>T_6	ATTACACGTCAAGTAGGAC	UBR2_c.1564C>T_p.R522C
UBR2_6:42635436_C>T_5	TTACACGTCAAGTAGGACA	UBR2_c.1564C>T_p.R522C
UBR2_6:42635436_C>T_4	TACACGTCAAGTAGGACAA	UBR2_c.1564C>T_p.R522C
UBR2_6:42635436_C>T_3	ACACGTCAAGTAGGACAAC	UBR2_c.1564C>T_p.R522C
UBR2_6:42635436_C>T_2	CACGTCAAGTAGGACAACA	UBR2_c.1564C>T_p.R522C
UBQLN2_X:56564933_G>A_6	CAGCAACGGTGTTCCCAGT	UBQLN2_c.1060G>A_p.V354I
UBQLN2_X:56564933_G>A_5	AGCAACGGTGTTCCCAGTA	UBQLN2_c.1060G>A_p.V354I
UBQLN2_X:56564933_G>A_4	GCAACGGTGTTCCCAGTAG	UBQLN2_c.1060G>A_p.V354I
UBQLN2_X:56564933_G>A_3	CAACGGTGTTCCCAGTAGC	UBQLN2_c.1060G>A_p.V354I
UBQLN2_X:56564933_G>A_2	AACGGTGTTCCCAGTAGCA	UBQLN2_c.1060G>A_p.V354I
UBE3B_12:109503101_C>T_6	TCGACTCTGCAGAAGTCCA	UBE3B_c.1361C>T_p.S454F
UBE3B_12:109503101_C>T_5	CGACTCTGCAGAAGTCCAG	UBE3B_c.1361C>T_p.S454F
UBE3B_12:109503101_C>T_4	GACTCTGCAGAAGTCCAGA	UBE3B_c.1361C>T_p.S454F
UBE3B_12:109503101_C>T_3	ACTCTGCAGAAGTCCAGAA	UBE3B_c.1361C>T_p.S454F
UBE3B_12:109503101_C>T_2	CTCTGCAGAAGTCCAGAAG	UBE3B_c.1361C>T_p.S454F
UBAP1_9:34179136_C>T_6	GGCGTTCGCTCTCCCTAGG	UBAP1_c.122C>T_p.S41L
UBAP1_9:34179136_C>T_5	GCGTTCGCTCTCCCTAGGG	UBAP1_c.122C>T_p.S41L
UBAP1_9:34179136_C>T_4	CGTTCGCTCTCCCTAGGGG	UBAP1_c.122C>T_p.S41L
UBAP1_9:34179136_C>T_3	GTTCGCTCTCCCTAGGGGC	UBAP1_c.122C>T_p.S41L
UBAP1_9:34179136_C>T_2	TTCGCTCTCCCTAGGGGCT	UBAP1_c.122C>T_p.S41L
UBA1_X:47203200_C>T_6	GGCAAGCAGAAGTATTTCC	UBA1_c.1405C>T_p.Q469*
UBA1_X:47203200_C>T_5	GCAAGCAGAAGTATTTCCT	UBA1_c.1405C>T_p.Q469*
UBA1_X:47203200_C>T_4	CAAGCAGAAGTATTTCCTG	UBA1_c.1405C>T_p.Q469*
UBA1_X:47203200_C>T_3	AAGCAGAAGTATTTCCTGG	UBA1_c.1405C>T_p.Q469*
UBA1_X:47203200_C>T_2	AGCAGAAGTATTTCCTGGT	UBA1_c.1405C>T_p.Q469*
U2AF1_21:43104346_C>T_6	GGTGCTCTCGGTTGCACAA	U2AF1_c.101C>T_p.S34F
U2AF1_21:43104346_C>T_5	GTGCTCTCGGTTGCACAAT	U2AF1_c.101C>T_p.S34F
U2AF1_21:43104346_C>T_4	TGCTCTCGGTTGCACAATA	U2AF1_c.101C>T_p.S34F
U2AF1_21:43104346_C>T_3	GCTCTCGGTTGCACAATAA	U2AF1_c.101C>T_p.S34F
U2AF1_21:43104346_C>T_2	CTCTCGGTTGCACAATAAA	U2AF1_c.101C>T_p.S34F
TYW1_7:67067402_C>T_6	TGTTGGCGGTAAGTAAAAA	TYW1_c.1273C>T_p.R425W
TYW1_7:67067402_C>T_5	GTTGGCGGTAAGTAAAAAT	TYW1_c.1273C>T_p.R425W
TYW1_7:67067402_C>T_4	TTGGCGGTAAGTAAAAATG	TYW1_c.1273C>T_p.R425W
TYW1_7:67067402_C>T_3	TGGCGGTAAGTAAAAATGA	TYW1_c.1273C>T_p.R425W
TYW1_7:67067402_C>T_2	GGCGGTAAGTAAAAATGAA	TYW1_c.1273C>T_p.R425W
TXLNG_X:16839866_C>T_6	ATTTGGCGTACCAAATGGG	TXLNG_c.1198C>T_p.R400C
TXLNG_X:16839866_C>T_5	TTTGGCGTACCAAATGGGA	TXLNG_c.1198C>T_p.R400C
TXLNG_X:16839866_C>T_4	TTGGCGTACCAAATGGGAA	TXLNG_c.1198C>T_p.R400C
TXLNG_X:16839866_C>T_3	TGGCGTACCAAATGGGAAA	TXLNG_c.1198C>T_p.R400C
TXLNG_X:16839866_C>T_2	GGCGTACCAAATGGGAAAA	TXLNG_c.1198C>T_p.R400C
TWF2_3:52231515_G>A_6	GCGTGGCCGCGTACAGCAT	TWF2_c.307G>A_p.A103T
TWF2_3:52231515_G>A_5	CGTGGCCGCGTACAGCATC	TWF2_c.307G>A_p.A103T
TWF2_3:52231515_G>A_4	GTGGCCGCGTACAGCATCT	TWF2_c.307G>A_p.A103T
TWF2_3:52231515_G>A_3	TGGCCGCGTACAGCATCTT	TWF2_c.307G>A_p.A103T
TWF2_3:52231515_G>A_2	GGCCGCGTACAGCATCTTC	TWF2_c.307G>A_p.A103T
TULP1_6:35509705_C>T_6	CCAGTGCGAGGAAGAGCCC	TULP1_c.647C>T_p.A216V
TULP1_6:35509705_C>T_5	CAGTGCGAGGAAGAGCCCA	TULP1_c.647C>T_p.A216V
TULP1_6:35509705_C>T_4	AGTGCGAGGAAGAGCCCAG	TULP1_c.647C>T_p.A216V
TULP1_6:35509705_C>T_3	GTGCGAGGAAGAGCCCAGC	TULP1_c.647C>T_p.A216V
TULP1_6:35509705_C>T_2	TGCGAGGAAGAGCCCAGCA	TULP1_c.647C>T_p.A216V
TUBB2B_6:3225745_C>T_6	TCGACTCGGTCCTGGATGT	TUBB2B_c.344C>T_p.S115L
TUBB2B_6:3225745_C>T_5	CGACTCGGTCCTGGATGTG	TUBB2B_c.344C>T_p.S115L
TUBB2B_6:3225745_C>T_4	GACTCGGTCCTGGATGTGG	TUBB2B_c.344C>T_p.S115L
TUBB2B_6:3225745_C>T_3	ACTCGGTCCTGGATGTGGT	TUBB2B_c.344C>T_p.S115L
TUBB2B_6:3225745_C>T_2	CTCGGTCCTGGATGTGGTG	TUBB2B_c.344C>T_p.S115L
TUBA4A_2:219250849_G>A_6	GCTGCTCGTGGTATGCCTT	TUBA4A_c.850G>A_p.E284K
TUBA4A_2:219250849_G>A_5	CTGCTCGTGGTATGCCTTT	TUBA4A_c.850G>A_p.E284K
TUBA4A_2:219250849_G>A_4	TGCTCGTGGTATGCCTTTT	TUBA4A_c.850G>A_p.E284K
TUBA4A_2:219250849_G>A_3	GCTCGTGGTATGCCTTTTC	TUBA4A_c.850G>A_p.E284K
TUBA4A_2:219250849_G>A_2	CTCGTGGTATGCCTTTTCT	TUBA4A_c.850G>A_p.E284K
TTYH1_19:54422373_C>T_6	CCCCTGCAGGTGGCTGAAA	TTYH1_c.601C>T_p.Q201*
TTYH1_19:54422373_C>T_5	CCCTGCAGGTGGCTGAAAA	TTYH1_c.601C>T_p.Q201*
TTYH1_19:54422373_C>T_4	CCTGCAGGTGGCTGAAAAT	TTYH1_c.601C>T_p.Q201*
TTYH1_19:54422373_C>T_3	CTGCAGGTGGCTGAAAATG	TTYH1_c.601C>T_p.Q201*
TTYH1_19:54422373_C>T_2	TGCAGGTGGCTGAAAATGT	TTYH1_c.601C>T_p.Q201*
TTN_2:178773874_C>T_6	CCAGCCCTTGGCCTCTCCA	TTN_c.7294C>T_p.L2432F
TTN_2:178773874_C>T_5	CAGCCCTTGGCCTCTCCAC	TTN_c.7294C>T_p.L2432F
TTN_2:178773874_C>T_4	AGCCCTTGGCCTCTCCACC	TTN_c.7294C>T_p.L2432F
TTN_2:178773874_C>T_3	GCCCTTGGCCTCTCCACCA	TTN_c.7294C>T_p.L2432F
TTN_2:178773874_C>T_2	CCCTTGGCCTCTCCACCAG	TTN_c.7294C>T_p.L2432F
TTN_2:178751070_C>T_6	CCCTTTCTAATCAAATGGA	TTN_c.11330C>T_p.S3777F
TTN_2:178751070_C>T_5	CCTTTCTAATCAAATGGAT	TTN_c.11330C>T_p.S3777F
TTN_2:178751070_C>T_4	CTTTCTAATCAAATGGATC	TTN_c.11330C>T_p.S3777F
TTN_2:178751070_C>T_3	TTTCTAATCAAATGGATCA	TTN_c.11330C>T_p.S3777F
TTN_2:178751070_C>T_2	TTCTAATCAAATGGATCAA	TTN_c.11330C>T_p.S3777F
TTN_2:178731197_C>T_6	AACCTGCAACAATCACCGA	TTN_c.17468C>T_p.A5823V
TTN_2:178731197_C>T_5	ACCTGCAACAATCACCGAG	TTN_c.17468C>T_p.A5823V
TTN_2:178731197_C>T_4	CCTGCAACAATCACCGAGG	TTN_c.17468C>T_p.A5823V
TTN_2:178731197_C>T_3	CTGCAACAATCACCGAGGA	TTN_c.17468C>T_p.A5823V
TTN_2:178731197_C>T_2	TGCAACAATCACCGAGGAA	TTN_c.17468C>T_p.A5823V
TTN_2:178672253_G>A_6	TTTCTTCAAGGACAGTTCT	TTN_c.34945G>A_p.E11649K
TTN_2:178672253_G>A_5	TTCTTCAAGGACAGTTCTC	TTN_c.34945G>A_p.E11649K
TTN_2:178672253_G>A_4	TCTTCAAGGACAGTTCTCC	TTN_c.34945G>A_p.E11649K
TTN_2:178672253_G>A_3	CTTCAAGGACAGTTCTCCC	TTN_c.34945G>A_p.E11649K
TTN_2:178672253_G>A_2	TTCAAGGACAGTTCTCCCT	TTN_c.34945G>A_p.E11649K
TTN_2:178599760_C>T_6	CATTCCCGACACTAACCTG	TTN_c.56141C>T_p.P18714L
TTN_2:178599760_C>T_5	ATTCCCGACACTAACCTGG	TTN_c.56141C>T_p.P18714L
TTN_2:178599760_C>T_4	TTCCCGACACTAACCTGGT	TTN_c.56141C>T_p.P18714L
TTN_2:178599760_C>T_3	TCCCGACACTAACCTGGTT	TTN_c.56141C>T_p.P18714L
TTN_2:178599760_C>T_2	CCCGACACTAACCTGGTTT	TTN_c.56141C>T_p.P18714L
TTN_2:178594237_C>T_6	GCACCCCCAACGCTTCACC	TTN_c.58156C>T_p.P19386S
TTN_2:178594237_C>T_5	CACCCCCAACGCTTCACCT	TTN_c.58156C>T_p.P19386S
TTN_2:178594237_C>T_4	ACCCCCAACGCTTCACCTC	TTN_c.58156C>T_p.P19386S
TTN_2:178594237_C>T_3	CCCCCAACGCTTCACCTCG	TTN_c.58156C>T_p.P19386S
TTN_2:178594237_C>T_2	CCCCAACGCTTCACCTCGA	TTN_c.58156C>T_p.P19386S
TTN_2:178588628_G>A_6	GATATTCATGGTCTGGGAG	TTN_c.63097G>A_p.E21033K
TTN_2:178588628_G>A_5	ATATTCATGGTCTGGGAGG	TTN_c.63097G>A_p.E21033K
TTN_2:178588628_G>A_4	TATTCATGGTCTGGGAGGA	TTN_c.63097G>A_p.E21033K
TTN_2:178588628_G>A_3	ATTCATGGTCTGGGAGGAG	TTN_c.63097G>A_p.E21033K
TTN_2:178588628_G>A_2	TTCATGGTCTGGGAGGAGA	TTN_c.63097G>A_p.E21033K
TTN_2:178554459_G>A_6	CAAATGCGTTCTTGGCTAC	TTN_c.88888G>A_p.A29630T
TTN_2:178554459_G>A_5	AAATGCGTTCTTGGCTACA	TTN_c.88888G>A_p.A29630T
TTN_2:178554459_G>A_4	AATGCGTTCTTGGCTACAA	TTN_c.88888G>A_p.A29630T
TTN_2:178554459_G>A_3	ATGCGTTCTTGGCTACAAC	TTN_c.88888G>A_p.A29630T
TTN_2:178554459_G>A_2	TGCGTTCTTGGCTACAACG	TTN_c.88888G>A_p.A29630T
TTC9_14:70642337_G>A_6	TCTTGTCCTTGTAGCACTG	TTC9_c.208G>A_p.D70N
TTC9_14:70642337_G>A_5	CTTGTCCTTGTAGCACTGC	TTC9_c.208G>A_p.D70N
TTC9_14:70642337_G>A_4	TTGTCCTTGTAGCACTGCG	TTC9_c.208G>A_p.D70N
TTC9_14:70642337_G>A_3	TGTCCTTGTAGCACTGCGC	TTC9_c.208G>A_p.D70N
TTC9_14:70642337_G>A_2	GTCCTTGTAGCACTGCGCC	TTC9_c.208G>A_p.D70N
TSNARE1_8:142344424_C>T_6	CCTCATCACCCACCATTGG	TSNARE1_c.287C>T_p.S96L
TSNARE1_8:142344424_C>T_5	CTCATCACCCACCATTGGC	TSNARE1_c.287C>T_p.S96L
TSNARE1_8:142344424_C>T_4	TCATCACCCACCATTGGCC	TSNARE1_c.287C>T_p.S96L
TSNARE1_8:142344424_C>T_3	CATCACCCACCATTGGCCC	TSNARE1_c.287C>T_p.S96L
TSNARE1_8:142344424_C>T_2	ATCACCCACCATTGGCCCG	TSNARE1_c.287C>T_p.S96L
TSKS_19:49747400_G>A_6	GCAGGGCAGAATTCTGCTT	TSKS_c.652G>A_p.A218T
TSKS_19:49747400_G>A_5	CAGGGCAGAATTCTGCTTC	TSKS_c.652G>A_p.A218T
TSKS_19:49747400_G>A_4	AGGGCAGAATTCTGCTTCA	TSKS_c.652G>A_p.A218T
TSKS_19:49747400_G>A_3	GGGCAGAATTCTGCTTCAA	TSKS_c.652G>A_p.A218T
TSKS_19:49747400_G>A_2	GGCAGAATTCTGCTTCAAG	TSKS_c.652G>A_p.A218T
TSC1_9:132896440_G>A_6	TTATTACGAAATAACTCTC	TSC1_c.3290G>A_p.R1097H
TSC1_9:132896440_G>A_5	TATTACGAAATAACTCTCG	TSC1_c.3290G>A_p.R1097H
TSC1_9:132896440_G>A_4	ATTACGAAATAACTCTCGA	TSC1_c.3290G>A_p.R1097H
TSC1_9:132896440_G>A_3	TTACGAAATAACTCTCGAG	TSC1_c.3290G>A_p.R1097H
TSC1_9:132896440_G>A_2	TACGAAATAACTCTCGAGC	TSC1_c.3290G>A_p.R1097H
TRRAP_7:98976604_C>T_6	CAATCCCCATCCGACCCTG	TRRAP_c.8060C>T_p.P2687L
TRRAP_7:98976604_C>T_5	AATCCCCATCCGACCCTGC	TRRAP_c.8060C>T_p.P2687L
TRRAP_7:98976604_C>T_4	ATCCCCATCCGACCCTGCG	TRRAP_c.8060C>T_p.P2687L
TRRAP_7:98976604_C>T_3	TCCCCATCCGACCCTGCGT	TRRAP_c.8060C>T_p.P2687L
TRRAP_7:98976604_C>T_2	CCCCATCCGACCCTGCGTC	TRRAP_c.8060C>T_p.P2687L
TRPV2_17:16422739_G>A_6	AATAGTCATCTGTGCACTG	TRPV2_c.475G>A_p.D159N
TRPV2_17:16422739_G>A_5	ATAGTCATCTGTGCACTGG	TRPV2_c.475G>A_p.D159N
TRPV2_17:16422739_G>A_4	TAGTCATCTGTGCACTGGG	TRPV2_c.475G>A_p.D159N
TRPV2_17:16422739_G>A_3	AGTCATCTGTGCACTGGGC	TRPV2_c.475G>A_p.D159N
TRPV2_17:16422739_G>A_2	GTCATCTGTGCACTGGGCA	TRPV2_c.475G>A_p.D159N
TRPV1_17:3583408_C>T_6	AAAAAACTGGAGACTATTT	TRPV1_c.1406C>T_p.T469I
TRPV1_17:3583408_C>T_5	AAAAACTGGAGACTATTTC	TRPV1_c.1406C>T_p.T469I
TRPV1_17:3583408_C>T_4	AAAACTGGAGACTATTTCC	TRPV1_c.1406C>T_p.T469I
TRPV1_17:3583408_C>T_3	AAACTGGAGACTATTTCCG	TRPV1_c.1406C>T_p.T469I
TRPV1_17:3583408_C>T_2	AACTGGAGACTATTTCCGA	TRPV1_c.1406C>T_p.T469I
TRPM6_9:74782688_G>A_6	CTATTTCTCCAGCATAGAC	TRPM6_c.3085G>A_p.E1029K
TRPM6_9:74782688_G>A_5	TATTTCTCCAGCATAGACT	TRPM6_c.3085G>A_p.E1029K
TRPM6_9:74782688_G>A_4	ATTTCTCCAGCATAGACTT	TRPM6_c.3085G>A_p.E1029K
TRPM6_9:74782688_G>A_3	TTTCTCCAGCATAGACTTC	TRPM6_c.3085G>A_p.E1029K
TRPM6_9:74782688_G>A_2	TTCTCCAGCATAGACTTCT	TRPM6_c.3085G>A_p.E1029K
TRPM3_9:70827891_G>A_6	TGTCTTCGAAGTTTCACCT	TRPM3_c.929G>A_p.R310Q
TRPM3_9:70827891_G>A_5	GTCTTCGAAGTTTCACCTC	TRPM3_c.929G>A_p.R310Q
TRPM3_9:70827891_G>A_4	TCTTCGAAGTTTCACCTCT	TRPM3_c.929G>A_p.R310Q
TRPM3_9:70827891_G>A_3	CTTCGAAGTTTCACCTCTG	TRPM3_c.929G>A_p.R310Q
TRPM3_9:70827891_G>A_2	TTCGAAGTTTCACCTCTGC	TRPM3_c.929G>A_p.R310Q
TRPM2_21:44418088_C>T_6	CTCCGGCCAAGAGGCACAA	TRPM2_c.3308C>T_p.A1103V
TRPM2_21:44418088_C>T_5	TCCGGCCAAGAGGCACAAG	TRPM2_c.3308C>T_p.A1103V
TRPM2_21:44418088_C>T_4	CCGGCCAAGAGGCACAAGC	TRPM2_c.3308C>T_p.A1103V
TRPM2_21:44418088_C>T_3	CGGCCAAGAGGCACAAGCA	TRPM2_c.3308C>T_p.A1103V
TRPM2_21:44418088_C>T_2	GGCCAAGAGGCACAAGCAG	TRPM2_c.3308C>T_p.A1103V
TRPC4AP_20:35005699_G>A_6	ACCTTTCATATCCACCTGG	TRPC4AP_c.1932G>A_p.M644I
TRPC4AP_20:35005699_G>A_5	CCTTTCATATCCACCTGGT	TRPC4AP_c.1932G>A_p.M644I
TRPC4AP_20:35005699_G>A_4	CTTTCATATCCACCTGGTT	TRPC4AP_c.1932G>A_p.M644I
TRPC4AP_20:35005699_G>A_3	TTTCATATCCACCTGGTTT	TRPC4AP_c.1932G>A_p.M644I
TRPC4AP_20:35005699_G>A_2	TTCATATCCACCTGGTTTT	TRPC4AP_c.1932G>A_p.M644I
TRPC4_13:37783242_C>T_6	TCTCGCCATCAGAAAAAGC	TRPC4_c.92C>T_p.P31L
TRPC4_13:37783242_C>T_5	CTCGCCATCAGAAAAAGCC	TRPC4_c.92C>T_p.P31L
TRPC4_13:37783242_C>T_4	TCGCCATCAGAAAAAGCCT	TRPC4_c.92C>T_p.P31L
TRPC4_13:37783242_C>T_3	CGCCATCAGAAAAAGCCTA	TRPC4_c.92C>T_p.P31L
TRPC4_13:37783242_C>T_2	GCCATCAGAAAAAGCCTAC	TRPC4_c.92C>T_p.P31L
TRPA1_8:72023102_C>T_6	ATCTTACTTTTCTCCTGGA	TRPA1_c.3164C>T_p.T1055I
TRPA1_8:72023102_C>T_5	TCTTACTTTTCTCCTGGAA	TRPA1_c.3164C>T_p.T1055I
TRPA1_8:72023102_C>T_4	CTTACTTTTCTCCTGGAAA	TRPA1_c.3164C>T_p.T1055I
TRPA1_8:72023102_C>T_3	TTACTTTTCTCCTGGAAAA	TRPA1_c.3164C>T_p.T1055I
TRPA1_8:72023102_C>T_2	TACTTTTCTCCTGGAAAAA	TRPA1_c.3164C>T_p.T1055I
TRMT12_8:124451565_C>T_6	ACGTGACCCAGTGTATGTT	TRMT12_c.638C>T_p.T213I
TRMT12_8:124451565_C>T_5	CGTGACCCAGTGTATGTTC	TRMT12_c.638C>T_p.T213I
TRMT12_8:124451565_C>T_4	GTGACCCAGTGTATGTTCT	TRMT12_c.638C>T_p.T213I
TRMT12_8:124451565_C>T_3	TGACCCAGTGTATGTTCTC	TRMT12_c.638C>T_p.T213I
TRMT12_8:124451565_C>T_2	GACCCAGTGTATGTTCTCC	TRMT12_c.638C>T_p.T213I
TRIT1_1:39841913_C>T_6	TATCAGCGCACATAAAATC	TRIT1_c.1235C>T_p.A412V
TRIT1_1:39841913_C>T_5	ATCAGCGCACATAAAATCC	TRIT1_c.1235C>T_p.A412V
TRIT1_1:39841913_C>T_4	TCAGCGCACATAAAATCCA	TRIT1_c.1235C>T_p.A412V
TRIT1_1:39841913_C>T_3	CAGCGCACATAAAATCCAA	TRIT1_c.1235C>T_p.A412V
TRIT1_1:39841913_C>T_2	AGCGCACATAAAATCCAAA	TRIT1_c.1235C>T_p.A412V
TRIP12_2:229792973_G>A_6	AAGTACCTCTAACTACAAG	TRIP12_c.3106G>A_p.G1036R
TRIP12_2:229792973_G>A_5	AGTACCTCTAACTACAAGG	TRIP12_c.3106G>A_p.G1036R
TRIP12_2:229792973_G>A_4	GTACCTCTAACTACAAGGT	TRIP12_c.3106G>A_p.G1036R
TRIP12_2:229792973_G>A_3	TACCTCTAACTACAAGGTA	TRIP12_c.3106G>A_p.G1036R
TRIP12_2:229792973_G>A_2	ACCTCTAACTACAAGGTAT	TRIP12_c.3106G>A_p.G1036R
TRIM64B_11:89870878_G>A_6	AATTGGCATCTGCAGTCCT	TRIM64B_c.1093G>A_p.A365T
TRIM64B_11:89870878_G>A_5	ATTGGCATCTGCAGTCCTG	TRIM64B_c.1093G>A_p.A365T
TRIM64B_11:89870878_G>A_4	TTGGCATCTGCAGTCCTGG	TRIM64B_c.1093G>A_p.A365T
TRIM64B_11:89870878_G>A_3	TGGCATCTGCAGTCCTGGA	TRIM64B_c.1093G>A_p.A365T
TRIM64B_11:89870878_G>A_2	GGCATCTGCAGTCCTGGAA	TRIM64B_c.1093G>A_p.A365T
TRIM44_11:35726045_C>T_6	CCACAGCTCATGTGACTGA	TRIM44_c.869C>T_p.A290V
TRIM44_11:35726045_C>T_5	CACAGCTCATGTGACTGAG	TRIM44_c.869C>T_p.A290V
TRIM44_11:35726045_C>T_4	ACAGCTCATGTGACTGAGA	TRIM44_c.869C>T_p.A290V
TRIM44_11:35726045_C>T_3	CAGCTCATGTGACTGAGAT	TRIM44_c.869C>T_p.A290V
TRIM44_11:35726045_C>T_2	AGCTCATGTGACTGAGATA	TRIM44_c.869C>T_p.A290V
TRIM39_6:30340291_G>A_6	AGCCTCCGAACTTTCTAGG	TRIM39_c.823G>A_p.G275R
TRIM39_6:30340291_G>A_5	GCCTCCGAACTTTCTAGGA	TRIM39_c.823G>A_p.G275R
TRIM39_6:30340291_G>A_4	CCTCCGAACTTTCTAGGAA	TRIM39_c.823G>A_p.G275R
TRIM39_6:30340291_G>A_3	CTCCGAACTTTCTAGGAAT	TRIM39_c.823G>A_p.G275R
TRIM39_6:30340291_G>A_2	TCCGAACTTTCTAGGAATA	TRIM39_c.823G>A_p.G275R
TREML2_6:41198337_G>A_6	CCTCCACGCGGTTTTTGTA	TREML2_c.148G>A_p.V50M
TREML2_6:41198337_G>A_5	CTCCACGCGGTTTTTGTAG	TREML2_c.148G>A_p.V50M
TREML2_6:41198337_G>A_4	TCCACGCGGTTTTTGTAGC	TREML2_c.148G>A_p.V50M
TREML2_6:41198337_G>A_3	CCACGCGGTTTTTGTAGCC	TREML2_c.148G>A_p.V50M
TREML2_6:41198337_G>A_2	CACGCGGTTTTTGTAGCCC	TREML2_c.148G>A_p.V50M
TREML2_6:41192834_G>A_6	CATAGACCATGATCAGCAT	TREML2_c.853G>A_p.V285I
TREML2_6:41192834_G>A_5	ATAGACCATGATCAGCATC	TREML2_c.853G>A_p.V285I
TREML2_6:41192834_G>A_4	TAGACCATGATCAGCATCA	TREML2_c.853G>A_p.V285I
TREML2_6:41192834_G>A_3	AGACCATGATCAGCATCAG	TREML2_c.853G>A_p.V285I
TREML2_6:41192834_G>A_2	GACCATGATCAGCATCAGC	TREML2_c.853G>A_p.V285I
TRDN_6:123548466_G>A_6	CAGTATCTTCGTCACCATC	TRDN_c.379G>A_p.D127N
TRDN_6:123548466_G>A_5	AGTATCTTCGTCACCATCA	TRDN_c.379G>A_p.D127N
TRDN_6:123548466_G>A_4	GTATCTTCGTCACCATCAT	TRDN_c.379G>A_p.D127N
TRDN_6:123548466_G>A_3	TATCTTCGTCACCATCATC	TRDN_c.379G>A_p.D127N
TRDN_6:123548466_G>A_2	ATCTTCGTCACCATCATCA	TRDN_c.379G>A_p.D127N
TRAPPC9_8:139885915_G>A_6	CCAGGACGAGCTGGTTCAG	TRAPPC9_c.3313G>A_p.V1105I
TRAPPC9_8:139885915_G>A_5	CAGGACGAGCTGGTTCAGG	TRAPPC9_c.3313G>A_p.V1105I
TRAPPC9_8:139885915_G>A_4	AGGACGAGCTGGTTCAGGA	TRAPPC9_c.3313G>A_p.V1105I
TRAPPC9_8:139885915_G>A_3	GGACGAGCTGGTTCAGGAG	TRAPPC9_c.3313G>A_p.V1105I
TRAPPC9_8:139885915_G>A_2	GACGAGCTGGTTCAGGAGT	TRAPPC9_c.3313G>A_p.V1105I
TRANK1_3:36855325_C>T_6	GGGACACGGCCCAGAGCAT	TRANK1_c.4265C>T_p.T1422M
TRANK1_3:36855325_C>T_5	GGACACGGCCCAGAGCATC	TRANK1_c.4265C>T_p.T1422M
TRANK1_3:36855325_C>T_4	GACACGGCCCAGAGCATCA	TRANK1_c.4265C>T_p.T1422M
TRANK1_3:36855325_C>T_3	ACACGGCCCAGAGCATCAT	TRANK1_c.4265C>T_p.T1422M
TRANK1_3:36855325_C>T_2	CACGGCCCAGAGCATCATG	TRANK1_c.4265C>T_p.T1422M
TRANK1_3:36855293_C>T_6	GCCTTCCGCTTCAGCGATC	TRANK1_c.4297C>T_p.R1433C
TRANK1_3:36855293_C>T_5	CCTTCCGCTTCAGCGATCT	TRANK1_c.4297C>T_p.R1433C
TRANK1_3:36855293_C>T_4	CTTCCGCTTCAGCGATCTG	TRANK1_c.4297C>T_p.R1433C
TRANK1_3:36855293_C>T_3	TTCCGCTTCAGCGATCTGC	TRANK1_c.4297C>T_p.R1433C
TRANK1_3:36855293_C>T_2	TCCGCTTCAGCGATCTGCG	TRANK1_c.4297C>T_p.R1433C
TRAM1_8:70583317_G>A_6	CCAGAACAGCGATTCTAAG	TRAM1_c.898G>A_p.V300I
TRAM1_8:70583317_G>A_5	CAGAACAGCGATTCTAAGA	TRAM1_c.898G>A_p.V300I
TRAM1_8:70583317_G>A_4	AGAACAGCGATTCTAAGAA	TRAM1_c.898G>A_p.V300I
TRAM1_8:70583317_G>A_3	GAACAGCGATTCTAAGAAA	TRAM1_c.898G>A_p.V300I
TRAM1_8:70583317_G>A_2	AACAGCGATTCTAAGAAAT	TRAM1_c.898G>A_p.V300I
TRAF4_17:28744189_G>A_6	GGCTCGCGCATGGGCTTCC	TRAF4_c.77G>A_p.R26H
TRAF4_17:28744189_G>A_5	GCTCGCGCATGGGCTTCCC	TRAF4_c.77G>A_p.R26H
TRAF4_17:28744189_G>A_4	CTCGCGCATGGGCTTCCCG	TRAF4_c.77G>A_p.R26H
TRAF4_17:28744189_G>A_3	TCGCGCATGGGCTTCCCGC	TRAF4_c.77G>A_p.R26H
TRAF4_17:28744189_G>A_2	CGCGCATGGGCTTCCCGCA	TRAF4_c.77G>A_p.R26H
TPSD1_16:1258152_C>T_6	TCCATACGGGCCACAGCTT	TPSD1_c.614C>T_p.T205M
TPSD1_16:1258152_C>T_5	CCATACGGGCCACAGCTTT	TPSD1_c.614C>T_p.T205M
TPSD1_16:1258152_C>T_4	CATACGGGCCACAGCTTTC	TPSD1_c.614C>T_p.T205M
TPSD1_16:1258152_C>T_3	ATACGGGCCACAGCTTTCA	TPSD1_c.614C>T_p.T205M
TPSD1_16:1258152_C>T_2	TACGGGCCACAGCTTTCAA	TPSD1_c.614C>T_p.T205M
TPCN2_11:69081405_C>T_6	GGAGGCCGGAGATGGTGGG	TPCN2_c.1595C>T_p.P532L
TPCN2_11:69081405_C>T_5	GAGGCCGGAGATGGTGGGC	TPCN2_c.1595C>T_p.P532L
TPCN2_11:69081405_C>T_4	AGGCCGGAGATGGTGGGCC	TPCN2_c.1595C>T_p.P532L
TPCN2_11:69081405_C>T_3	GGCCGGAGATGGTGGGCCT	TPCN2_c.1595C>T_p.P532L
TPCN2_11:69081405_C>T_2	GCCGGAGATGGTGGGCCTG	TPCN2_c.1595C>T_p.P532L
TPCN2_11:69078770_G>A_6	CACGCTCAGCAGGCAGCAC	TPCN2_c.1387G>A_p.E463K
TPCN2_11:69078770_G>A_5	ACGCTCAGCAGGCAGCACA	TPCN2_c.1387G>A_p.E463K
TPCN2_11:69078770_G>A_4	CGCTCAGCAGGCAGCACAT	TPCN2_c.1387G>A_p.E463K
TPCN2_11:69078770_G>A_3	GCTCAGCAGGCAGCACATC	TPCN2_c.1387G>A_p.E463K
TPCN2_11:69078770_G>A_2	CTCAGCAGGCAGCACATCT	TPCN2_c.1387G>A_p.E463K
TP53_17:7676257_C>T_6	CCGTCCCAAGCAATGGATG	TP53_c.112C>T_p.Q38*
TP53_17:7676257_C>T_5	CGTCCCAAGCAATGGATGA	TP53_c.112C>T_p.Q38*
TP53_17:7676257_C>T_4	GTCCCAAGCAATGGATGAT	TP53_c.112C>T_p.Q38*
TP53_17:7676257_C>T_3	TCCCAAGCAATGGATGATT	TP53_c.112C>T_p.Q38*
TP53_17:7676257_C>T_2	CCCAAGCAATGGATGATTT	TP53_c.112C>T_p.Q38*
TP53_17:7676096_G>A_6	CAGGGGCCAGGAGGGGGCT	TP53_c.156G>A_p.W52*
TP53_17:7676096_G>A_5	AGGGGCCAGGAGGGGGCTG	TP53_c.156G>A_p.W52*
TP53_17:7676096_G>A_4	GGGGCCAGGAGGGGGCTGG	TP53_c.156G>A_p.W52*
TP53_17:7676096_G>A_3	GGGCCAGGAGGGGGCTGGT	TP53_c.156G>A_p.W52*
TP53_17:7676096_G>A_2	GGCCAGGAGGGGGCTGGTG	TP53_c.156G>A_p.W52*
TP53_17:7676071_C>T_6	CCTTCCCAGAAAACCTACC	TP53_c.298C>T_p.Q100*
TP53_17:7676071_C>T_5	CTTCCCAGAAAACCTACCA	TP53_c.298C>T_p.Q100*
TP53_17:7676071_C>T_4	TTCCCAGAAAACCTACCAG	TP53_c.298C>T_p.Q100*
TP53_17:7676071_C>T_3	TCCCAGAAAACCTACCAGG	TP53_c.298C>T_p.Q100*
TP53_17:7676071_C>T_2	CCCAGAAAACCTACCAGGG	TP53_c.298C>T_p.Q100*
TP53_17:7676059_C>T_6	ACCTACCAGGGCAGCTACG	TP53_c.310C>T_p.Q104*
TP53_17:7676059_C>T_5	CCTACCAGGGCAGCTACGG	TP53_c.310C>T_p.Q104*
TP53_17:7676059_C>T_4	CTACCAGGGCAGCTACGGT	TP53_c.310C>T_p.Q104*
TP53_17:7676059_C>T_3	TACCAGGGCAGCTACGGTT	TP53_c.310C>T_p.Q104*
TP53_17:7676059_C>T_2	ACCAGGGCAGCTACGGTTT	TP53_c.310C>T_p.Q104*
TP53_17:7675232_C>T_6	AGTACTCCCCTGCCCTCAA	TP53_c.380C>T	c.263C>T_p.S127F	p.S88F
TP53_17:7675232_C>T_5	GTACTCCCCTGCCCTCAAC	TP53_c.380C>T	c.263C>T_p.S127F	p.S88F
TP53_17:7675232_C>T_4	TACTCCCCTGCCCTCAACA	TP53_c.380C>T	c.263C>T_p.S127F	p.S88F
TP53_17:7675232_C>T_3	ACTCCCCTGCCCTCAACAA	TP53_c.380C>T	c.263C>T_p.S127F	p.S88F
TP53_17:7675232_C>T_2	CTCCCCTGCCCTCAACAAG	TP53_c.380C>T	c.263C>T_p.S127F	p.S88F
TP53_17:7675208_G>A_6	AGTTGGCAAAACATCTTGT	TP53_c.404G>A_p.C135Y
TP53_17:7675208_G>A_5	GTTGGCAAAACATCTTGTT	TP53_c.404G>A_p.C135Y
TP53_17:7675208_G>A_4	TTGGCAAAACATCTTGTTG	TP53_c.404G>A_p.C135Y
TP53_17:7675208_G>A_3	TGGCAAAACATCTTGTTGA	TP53_c.404G>A_p.C135Y
TP53_17:7675208_G>A_2	GGCAAAACATCTTGTTGAG	TP53_c.404G>A_p.C135Y
TP53_17:7675190_G>A_6	ACAGGGCAGGTCTTGGCCA	TP53_c.422G>A	c.305G>A_p.C141Y	p.C102Y
TP53_17:7675190_G>A_5	CAGGGCAGGTCTTGGCCAG	TP53_c.422G>A	c.305G>A_p.C141Y	p.C102Y
TP53_17:7675190_G>A_4	AGGGCAGGTCTTGGCCAGT	TP53_c.422G>A	c.305G>A_p.C141Y	p.C102Y
TP53_17:7675190_G>A_3	GGGCAGGTCTTGGCCAGTT	TP53_c.422G>A	c.305G>A_p.C141Y	p.C102Y
TP53_17:7675190_G>A_2	GGCAGGTCTTGGCCAGTTG	TP53_c.422G>A	c.305G>A_p.C141Y	p.C102Y
TP53_17:7675185_G>A_6	GCTGCACAGGGCAGGTCTT	TP53_c.427G>A_p.V143M
TP53_17:7675185_G>A_5	CTGCACAGGGCAGGTCTTG	TP53_c.427G>A_p.V143M
TP53_17:7675185_G>A_4	TGCACAGGGCAGGTCTTGG	TP53_c.427G>A_p.V143M
TP53_17:7675185_G>A_3	GCACAGGGCAGGTCTTGGC	TP53_c.427G>A_p.V143M
TP53_17:7675185_G>A_2	CACAGGGCAGGTCTTGGCC	TP53_c.427G>A_p.V143M
TP53_17:7675182_C>T_6	CCTGTGCAGCTGTGGGTTG	TP53_c.430C>T_p.Q144*
TP53_17:7675182_C>T_5	CTGTGCAGCTGTGGGTTGA	TP53_c.430C>T_p.Q144*
TP53_17:7675182_C>T_4	TGTGCAGCTGTGGGTTGAT	TP53_c.430C>T_p.Q144*
TP53_17:7675182_C>T_3	GTGCAGCTGTGGGTTGATT	TP53_c.430C>T_p.Q144*
TP53_17:7675182_C>T_2	TGCAGCTGTGGGTTGATTC	TP53_c.430C>T_p.Q144*
TP53_17:7675174_G>A_6	ATCAACCCACAGCTGCACA	TP53_c.438G>A	c.321G>A_p.W146*	p.W107*
TP53_17:7675174_G>A_5	TCAACCCACAGCTGCACAG	TP53_c.438G>A	c.321G>A_p.W146*	p.W107*
TP53_17:7675174_G>A_4	CAACCCACAGCTGCACAGG	TP53_c.438G>A	c.321G>A_p.W146*	p.W107*
TP53_17:7675174_G>A_3	AACCCACAGCTGCACAGGG	TP53_c.438G>A	c.321G>A_p.W146*	p.W107*
TP53_17:7675174_G>A_2	ACCCACAGCTGCACAGGGC	TP53_c.438G>A	c.321G>A_p.W146*	p.W107*
TP53_17:7675161_C>T_6	TCCACACCCCCGCCCGGCA	TP53_c.451C>T_p.P151S
TP53_17:7675161_C>T_5	CCACACCCCCGCCCGGCAC	TP53_c.451C>T_p.P151S
TP53_17:7675161_C>T_4	CACACCCCCGCCCGGCACC	TP53_c.451C>T_p.P151S
TP53_17:7675161_C>T_3	ACACCCCCGCCCGGCACCC	TP53_c.451C>T_p.P151S
TP53_17:7675161_C>T_2	CACCCCCGCCCGGCACCCG	TP53_c.451C>T_p.P151S
TP53_17:7675157_C>T_6	CACCCCCGCCCGGCACCCG	TP53_c.455C>T_p.P152L
TP53_17:7675157_C>T_5	ACCCCCGCCCGGCACCCGC	TP53_c.455C>T_p.P152L
TP53_17:7675157_C>T_4	CCCCCGCCCGGCACCCGCG	TP53_c.455C>T_p.P152L
TP53_17:7675157_C>T_3	CCCCGCCCGGCACCCGCGT	TP53_c.455C>T_p.P152L
TP53_17:7675157_C>T_2	CCCGCCCGGCACCCGCGTC	TP53_c.455C>T_p.P152L
TP53_17:7675154_C>T_6	CCCCGCCCGGCACCCGCGT	TP53_c.458C>T_p.P153L
TP53_17:7675154_C>T_5	CCCGCCCGGCACCCGCGTC	TP53_c.458C>T_p.P153L
TP53_17:7675154_C>T_4	CCGCCCGGCACCCGCGTCC	TP53_c.458C>T_p.P153L
TP53_17:7675154_C>T_3	CGCCCGGCACCCGCGTCCG	TP53_c.458C>T_p.P153L
TP53_17:7675154_C>T_2	GCCCGGCACCCGCGTCCGC	TP53_c.458C>T_p.P153L
TP53_17:7675139_G>A_6	ATGGCGCGGACGCGGGTGC	TP53_c.473G>A_p.R158H
TP53_17:7675139_G>A_5	TGGCGCGGACGCGGGTGCC	TP53_c.473G>A_p.R158H
TP53_17:7675139_G>A_4	GGCGCGGACGCGGGTGCCG	TP53_c.473G>A_p.R158H
TP53_17:7675139_G>A_3	GCGCGGACGCGGGTGCCGG	TP53_c.473G>A_p.R158H
TP53_17:7675139_G>A_2	CGCGGACGCGGGTGCCGGG	TP53_c.473G>A_p.R158H
TP53_17:7675136_C>T_6	TCCGCGCCATGGCCATCTA	TP53_c.476C>T_p.A159V
TP53_17:7675136_C>T_5	CCGCGCCATGGCCATCTAC	TP53_c.476C>T_p.A159V
TP53_17:7675136_C>T_4	CGCGCCATGGCCATCTACA	TP53_c.476C>T_p.A159V
TP53_17:7675136_C>T_3	GCGCCATGGCCATCTACAA	TP53_c.476C>T_p.A159V
TP53_17:7675136_C>T_2	CGCCATGGCCATCTACAAG	TP53_c.476C>T_p.A159V
TP53_17:7675131_G>A_6	AGATGGCCATGGCGCGGAC	TP53_c.481G>A_p.A161T
TP53_17:7675131_G>A_5	GATGGCCATGGCGCGGACG	TP53_c.481G>A_p.A161T
TP53_17:7675131_G>A_4	ATGGCCATGGCGCGGACGC	TP53_c.481G>A_p.A161T
TP53_17:7675131_G>A_3	TGGCCATGGCGCGGACGCG	TP53_c.481G>A_p.A161T
TP53_17:7675131_G>A_2	GGCCATGGCGCGGACGCGG	TP53_c.481G>A_p.A161T
TP53_17:7675098_G>A_6	TCACAACCTCCGTCATGTG	TP53_c.514G>A_p.V172I
TP53_17:7675098_G>A_5	CACAACCTCCGTCATGTGC	TP53_c.514G>A_p.V172I
TP53_17:7675098_G>A_4	ACAACCTCCGTCATGTGCT	TP53_c.514G>A_p.V172I
TP53_17:7675098_G>A_3	CAACCTCCGTCATGTGCTG	TP53_c.514G>A_p.V172I
TP53_17:7675098_G>A_2	AACCTCCGTCATGTGCTGT	TP53_c.514G>A_p.V172I
TP53_17:7675088_G>A_6	GGGCAGCGCCTCACAACCT	TP53_c.524G>A	c.407G>A_p.R175H	p.R136H
TP53_17:7675088_G>A_5	GGCAGCGCCTCACAACCTC	TP53_c.524G>A	c.407G>A_p.R175H	p.R136H
TP53_17:7675088_G>A_4	GCAGCGCCTCACAACCTCC	TP53_c.524G>A	c.407G>A_p.R175H	p.R136H
TP53_17:7675088_G>A_3	CAGCGCCTCACAACCTCCG	TP53_c.524G>A	c.407G>A_p.R175H	p.R136H
TP53_17:7675088_G>A_2	AGCGCCTCACAACCTCCGT	TP53_c.524G>A	c.407G>A_p.R175H	p.R136H
TP53_17:7675085_G>A_6	TGGGGGCAGCGCCTCACAA	TP53_c.527G>A	c.410G>A_p.C176Y	p.C137Y
TP53_17:7675085_G>A_5	GGGGGCAGCGCCTCACAAC	TP53_c.527G>A	c.410G>A_p.C176Y	p.C137Y
TP53_17:7675085_G>A_4	GGGGCAGCGCCTCACAACC	TP53_c.527G>A	c.410G>A_p.C176Y	p.C137Y
TP53_17:7675085_G>A_3	GGGCAGCGCCTCACAACCT	TP53_c.527G>A	c.410G>A_p.C176Y	p.C137Y
TP53_17:7675085_G>A_2	GGCAGCGCCTCACAACCTC	TP53_c.527G>A	c.410G>A_p.C176Y	p.C137Y
TP53_17:7675077_C>T_6	CCCCACCATGAGCGCTGCT	TP53_c.535C>T	c.418C>T_p.H179Y	p.H140Y
TP53_17:7675077_C>T_5	CCCACCATGAGCGCTGCTC	TP53_c.535C>T	c.418C>T_p.H179Y	p.H140Y
TP53_17:7675077_C>T_4	CCACCATGAGCGCTGCTCA	TP53_c.535C>T	c.418C>T_p.H179Y	p.H140Y
TP53_17:7675077_C>T_3	CACCATGAGCGCTGCTCAG	TP53_c.535C>T	c.418C>T_p.H179Y	p.H140Y
TP53_17:7675077_C>T_2	ACCATGAGCGCTGCTCAGA	TP53_c.535C>T	c.418C>T_p.H179Y	p.H140Y
TP53_17:7674962_C>T_6	TGGCCCCTCCTCAGCATCT	TP53_c.569C>T	c.452C>T_p.P190L	p.P151L
TP53_17:7674962_C>T_5	GGCCCCTCCTCAGCATCTT	TP53_c.569C>T	c.452C>T_p.P190L	p.P151L
TP53_17:7674962_C>T_4	GCCCCTCCTCAGCATCTTA	TP53_c.569C>T	c.452C>T_p.P190L	p.P151L
TP53_17:7674962_C>T_3	CCCCTCCTCAGCATCTTAT	TP53_c.569C>T	c.452C>T_p.P190L	p.P151L
TP53_17:7674962_C>T_2	CCCTCCTCAGCATCTTATC	TP53_c.569C>T	c.452C>T_p.P190L	p.P151L
TP53_17:7674957_C>T_6	CCTCCTCAGCATCTTATCC	TP53_c.574C>T	c.457C>T_p.Q192*	p.Q153*
TP53_17:7674957_C>T_5	CTCCTCAGCATCTTATCCG	TP53_c.574C>T	c.457C>T_p.Q192*	p.Q153*
TP53_17:7674957_C>T_4	TCCTCAGCATCTTATCCGA	TP53_c.574C>T	c.457C>T_p.Q192*	p.Q153*
TP53_17:7674957_C>T_3	CCTCAGCATCTTATCCGAG	TP53_c.574C>T	c.457C>T_p.Q192*	p.Q153*
TP53_17:7674957_C>T_2	CTCAGCATCTTATCCGAGT	TP53_c.574C>T	c.457C>T_p.Q192*	p.Q153*
TP53_17:7674954_C>T_6	CCTCAGCATCTTATCCGAG	TP53_c.577C>T_p.H193Y
TP53_17:7674954_C>T_5	CTCAGCATCTTATCCGAGT	TP53_c.577C>T_p.H193Y
TP53_17:7674954_C>T_4	TCAGCATCTTATCCGAGTG	TP53_c.577C>T_p.H193Y
TP53_17:7674954_C>T_3	CAGCATCTTATCCGAGTGG	TP53_c.577C>T_p.H193Y
TP53_17:7674954_C>T_2	AGCATCTTATCCGAGTGGA	TP53_c.577C>T_p.H193Y
TP53_17:7674945_C>T_6	CTTATCCGAGTGGAAGGAA	TP53_c.586C>T	c.469C>T_p.R196*	p.R157*
TP53_17:7674945_C>T_5	TTATCCGAGTGGAAGGAAA	TP53_c.586C>T	c.469C>T_p.R196*	p.R157*
TP53_17:7674945_C>T_4	TATCCGAGTGGAAGGAAAT	TP53_c.586C>T	c.469C>T_p.R196*	p.R157*
TP53_17:7674945_C>T_3	ATCCGAGTGGAAGGAAATT	TP53_c.586C>T	c.469C>T_p.R196*	p.R157*
TP53_17:7674945_C>T_2	TCCGAGTGGAAGGAAATTT	TP53_c.586C>T	c.469C>T_p.R196*	p.R157*
TP53_17:7674894_C>T_6	ACTTTTCGACATAGTGTGG	TP53_c.637C>T	c.520C>T_p.R213*	p.R174*
TP53_17:7674894_C>T_5	CTTTTCGACATAGTGTGGT	TP53_c.637C>T	c.520C>T_p.R213*	p.R174*
TP53_17:7674894_C>T_4	TTTTCGACATAGTGTGGTG	TP53_c.637C>T	c.520C>T_p.R213*	p.R174*
TP53_17:7674894_C>T_3	TTTCGACATAGTGTGGTGG	TP53_c.637C>T	c.520C>T_p.R213*	p.R174*
TP53_17:7674894_C>T_2	TTCGACATAGTGTGGTGGT	TP53_c.637C>T	c.520C>T_p.R213*	p.R174*
TP53_17:7674893_G>A_6	CTATGTCGAAAAGTGTTTC	TP53_c.638G>A	c.521G>A_p.R213Q	p.R174Q
TP53_17:7674893_G>A_5	TATGTCGAAAAGTGTTTCT	TP53_c.638G>A	c.521G>A_p.R213Q	p.R174Q
TP53_17:7674893_G>A_4	ATGTCGAAAAGTGTTTCTG	TP53_c.638G>A	c.521G>A_p.R213Q	p.R174Q
TP53_17:7674893_G>A_3	TGTCGAAAAGTGTTTCTGT	TP53_c.638G>A	c.521G>A_p.R213Q	p.R174Q
TP53_17:7674893_G>A_2	GTCGAAAAGTGTTTCTGTC	TP53_c.638G>A	c.521G>A_p.R213Q	p.R174Q
TP53_17:7674885_G>A_6	CCACCACACTATGTCGAAA	TP53_c.646G>A	c.529G>A_p.V216M	p.V177M
TP53_17:7674885_G>A_5	CACCACACTATGTCGAAAA	TP53_c.646G>A	c.529G>A_p.V216M	p.V177M
TP53_17:7674885_G>A_4	ACCACACTATGTCGAAAAG	TP53_c.646G>A	c.529G>A_p.V216M	p.V177M
TP53_17:7674885_G>A_3	CCACACTATGTCGAAAAGT	TP53_c.646G>A	c.529G>A_p.V216M	p.V177M
TP53_17:7674885_G>A_2	CACACTATGTCGAAAAGTG	TP53_c.646G>A	c.529G>A_p.V216M	p.V177M
TP53_17:7674252_G>A_6	GTTACACATGTAGTTGTAG	TP53_c.711G>A	c.594G>A_p.M237I	p.M198I
TP53_17:7674252_G>A_5	TTACACATGTAGTTGTAGT	TP53_c.711G>A	c.594G>A_p.M237I	p.M198I
TP53_17:7674252_G>A_4	TACACATGTAGTTGTAGTG	TP53_c.711G>A	c.594G>A_p.M237I	p.M198I
TP53_17:7674252_G>A_3	ACACATGTAGTTGTAGTGG	TP53_c.711G>A	c.594G>A_p.M237I	p.M198I
TP53_17:7674252_G>A_2	CACATGTAGTTGTAGTGGA	TP53_c.711G>A	c.594G>A_p.M237I	p.M198I
TP53_17:7674250_G>A_6	CTGTTACACATGTAGTTGT	TP53_c.713G>A	c.596G>A_p.C238Y	p.C199Y
TP53_17:7674250_G>A_5	TGTTACACATGTAGTTGTA	TP53_c.713G>A	c.596G>A_p.C238Y	p.C199Y
TP53_17:7674250_G>A_4	GTTACACATGTAGTTGTAG	TP53_c.713G>A	c.596G>A_p.C238Y	p.C199Y
TP53_17:7674250_G>A_3	TTACACATGTAGTTGTAGT	TP53_c.713G>A	c.596G>A_p.C238Y	p.C199Y
TP53_17:7674250_G>A_2	TACACATGTAGTTGTAGTG	TP53_c.713G>A	c.596G>A_p.C238Y	p.C199Y
TP53_17:7674241_C>T_6	ACAGTTCCTGCATGGGCGG	TP53_c.722C>T	c.605C>T_p.S241F	p.S202F
TP53_17:7674241_C>T_5	CAGTTCCTGCATGGGCGGC	TP53_c.722C>T	c.605C>T_p.S241F	p.S202F
TP53_17:7674241_C>T_4	AGTTCCTGCATGGGCGGCA	TP53_c.722C>T	c.605C>T_p.S241F	p.S202F
TP53_17:7674241_C>T_3	GTTCCTGCATGGGCGGCAT	TP53_c.722C>T	c.605C>T_p.S241F	p.S202F
TP53_17:7674241_C>T_2	TTCCTGCATGGGCGGCATG	TP53_c.722C>T	c.605C>T_p.S241F	p.S202F
TP53_17:7674238_G>A_6	CCCATGCAGGAACTGTTAC	TP53_c.725G>A_p.C242Y
TP53_17:7674238_G>A_5	CCATGCAGGAACTGTTACA	TP53_c.725G>A_p.C242Y
TP53_17:7674238_G>A_4	CATGCAGGAACTGTTACAC	TP53_c.725G>A_p.C242Y
TP53_17:7674238_G>A_3	ATGCAGGAACTGTTACACA	TP53_c.725G>A_p.C242Y
TP53_17:7674238_G>A_2	TGCAGGAACTGTTACACAT	TP53_c.725G>A_p.C242Y
TP53_17:7674234_G>A_6	GCCGCCCATGCAGGAACTG	TP53_c.729G>A_p.M243I
TP53_17:7674234_G>A_5	CCGCCCATGCAGGAACTGT	TP53_c.729G>A_p.M243I
TP53_17:7674234_G>A_4	CGCCCATGCAGGAACTGTT	TP53_c.729G>A_p.M243I
TP53_17:7674234_G>A_3	GCCCATGCAGGAACTGTTA	TP53_c.729G>A_p.M243I
TP53_17:7674234_G>A_2	CCCATGCAGGAACTGTTAC	TP53_c.729G>A_p.M243I
TP53_17:7674232_G>A_6	ATGCCGCCCATGCAGGAAC	TP53_c.614G>A_p.G205D
TP53_17:7674232_G>A_5	TGCCGCCCATGCAGGAACT	TP53_c.614G>A_p.G205D
TP53_17:7674232_G>A_4	GCCGCCCATGCAGGAACTG	TP53_c.614G>A_p.G205D
TP53_17:7674232_G>A_3	CCGCCCATGCAGGAACTGT	TP53_c.614G>A_p.G205D
TP53_17:7674232_G>A_2	CGCCCATGCAGGAACTGTT	TP53_c.614G>A_p.G205D
TP53_17:7674230_G>A_6	TCATGCCGCCCATGCAGGA	TP53_c.733G>A	c.616G>A_p.G245S	p.G206S
TP53_17:7674230_G>A_5	CATGCCGCCCATGCAGGAA	TP53_c.733G>A	c.616G>A_p.G245S	p.G206S
TP53_17:7674230_G>A_4	ATGCCGCCCATGCAGGAAC	TP53_c.733G>A	c.616G>A_p.G245S	p.G206S
TP53_17:7674230_G>A_3	TGCCGCCCATGCAGGAACT	TP53_c.733G>A	c.616G>A_p.G245S	p.G206S
TP53_17:7674230_G>A_2	GCCGCCCATGCAGGAACTG	TP53_c.733G>A	c.616G>A_p.G245S	p.G206S
TP53_17:7674229_G>A_6	TTCATGCCGCCCATGCAGG	TP53_c.734G>A	c.617G>A_p.G245D	p.G206D
TP53_17:7674229_G>A_5	TCATGCCGCCCATGCAGGA	TP53_c.734G>A	c.617G>A_p.G245D	p.G206D
TP53_17:7674229_G>A_4	CATGCCGCCCATGCAGGAA	TP53_c.734G>A	c.617G>A_p.G245D	p.G206D
TP53_17:7674229_G>A_3	ATGCCGCCCATGCAGGAAC	TP53_c.734G>A	c.617G>A_p.G245D	p.G206D
TP53_17:7674229_G>A_2	TGCCGCCCATGCAGGAACT	TP53_c.734G>A	c.617G>A_p.G245D	p.G206D
TP53_17:7674221_C>T_6	ATGAACCGGAGGCCCATCC	TP53_c.742C>T	c.625C>T_p.R248W	p.R209W
TP53_17:7674221_C>T_5	TGAACCGGAGGCCCATCCT	TP53_c.742C>T	c.625C>T_p.R248W	p.R209W
TP53_17:7674221_C>T_4	GAACCGGAGGCCCATCCTC	TP53_c.742C>T	c.625C>T_p.R248W	p.R209W
TP53_17:7674221_C>T_3	AACCGGAGGCCCATCCTCA	TP53_c.742C>T	c.625C>T_p.R248W	p.R209W
TP53_17:7674221_C>T_2	ACCGGAGGCCCATCCTCAC	TP53_c.742C>T	c.625C>T_p.R248W	p.R209W
TP53_17:7674220_G>A_6	GGCCTCCGGTTCATGCCGC	TP53_c.743G>A	c.626G>A_p.R248Q	p.R209Q
TP53_17:7674220_G>A_5	GCCTCCGGTTCATGCCGCC	TP53_c.743G>A	c.626G>A_p.R248Q	p.R209Q
TP53_17:7674220_G>A_4	CCTCCGGTTCATGCCGCCC	TP53_c.743G>A	c.626G>A_p.R248Q	p.R209Q
TP53_17:7674220_G>A_3	CTCCGGTTCATGCCGCCCA	TP53_c.743G>A	c.626G>A_p.R248Q	p.R209Q
TP53_17:7674220_G>A_2	TCCGGTTCATGCCGCCCAT	TP53_c.743G>A	c.626G>A_p.R248Q	p.R209Q
TP53_17:7674209_C>T_6	CCCATCCTCACCATCATCA	TP53_c.754C>T_p.L252F
TP53_17:7674209_C>T_5	CCATCCTCACCATCATCAC	TP53_c.754C>T_p.L252F
TP53_17:7674209_C>T_4	CATCCTCACCATCATCACA	TP53_c.754C>T_p.L252F
TP53_17:7674209_C>T_3	ATCCTCACCATCATCACAC	TP53_c.754C>T_p.L252F
TP53_17:7674209_C>T_2	TCCTCACCATCATCACACT	TP53_c.754C>T_p.L252F
TP53_17:7673821_C>T_6	CTGGGACGGAACAGCTTTG	TP53_c.682C>T_p.R228W
TP53_17:7673821_C>T_5	TGGGACGGAACAGCTTTGA	TP53_c.682C>T_p.R228W
TP53_17:7673821_C>T_4	GGGACGGAACAGCTTTGAG	TP53_c.682C>T_p.R228W
TP53_17:7673821_C>T_3	GGACGGAACAGCTTTGAGG	TP53_c.682C>T_p.R228W
TP53_17:7673821_C>T_2	GACGGAACAGCTTTGAGGT	TP53_c.682C>T_p.R228W
TP53_17:7673820_G>A_6	CTGTTCCGTCCCAGTAGAT	TP53_c.800G>A_p.R267Q
TP53_17:7673820_G>A_5	TGTTCCGTCCCAGTAGATT	TP53_c.800G>A_p.R267Q
TP53_17:7673820_G>A_4	GTTCCGTCCCAGTAGATTA	TP53_c.800G>A_p.R267Q
TP53_17:7673820_G>A_3	TTCCGTCCCAGTAGATTAC	TP53_c.800G>A_p.R267Q
TP53_17:7673820_G>A_2	TCCGTCCCAGTAGATTACC	TP53_c.800G>A_p.R267Q
TP53_17:7673806_G>A_6	CACGCACCTCAAAGCTGTT	TP53_c.814G>A_p.V272M
TP53_17:7673806_G>A_5	ACGCACCTCAAAGCTGTTC	TP53_c.814G>A_p.V272M
TP53_17:7673806_G>A_4	CGCACCTCAAAGCTGTTCC	TP53_c.814G>A_p.V272M
TP53_17:7673806_G>A_3	GCACCTCAAAGCTGTTCCG	TP53_c.814G>A_p.V272M
TP53_17:7673806_G>A_2	CACCTCAAAGCTGTTCCGT	TP53_c.814G>A_p.V272M
TP53_17:7673803_C>T_6	GAGGTGCGTGTTTGTGCCT	TP53_c.817C>T	c.700C>T_p.R273C	p.R234C
TP53_17:7673803_C>T_5	AGGTGCGTGTTTGTGCCTG	TP53_c.817C>T	c.700C>T_p.R273C	p.R234C
TP53_17:7673803_C>T_4	GGTGCGTGTTTGTGCCTGT	TP53_c.817C>T	c.700C>T_p.R273C	p.R234C
TP53_17:7673803_C>T_3	GTGCGTGTTTGTGCCTGTC	TP53_c.817C>T	c.700C>T_p.R273C	p.R234C
TP53_17:7673803_C>T_2	TGCGTGTTTGTGCCTGTCC	TP53_c.817C>T	c.700C>T_p.R273C	p.R234C
TP53_17:7673802_G>A_6	CAAACACGCACCTCAAAGC	TP53_c.818G>A	c.701G>A_p.R273H	p.R234H
TP53_17:7673802_G>A_5	AAACACGCACCTCAAAGCT	TP53_c.818G>A	c.701G>A_p.R273H	p.R234H
TP53_17:7673802_G>A_4	AACACGCACCTCAAAGCTG	TP53_c.818G>A	c.701G>A_p.R273H	p.R234H
TP53_17:7673802_G>A_3	ACACGCACCTCAAAGCTGT	TP53_c.818G>A	c.701G>A_p.R273H	p.R234H
TP53_17:7673802_G>A_2	CACGCACCTCAAAGCTGTT	TP53_c.818G>A	c.701G>A_p.R273H	p.R234H
TP53_17:7673796_G>A_6	CAGGCACAAACACGCACCT	TP53_c.824G>A_p.C275Y
TP53_17:7673796_G>A_5	AGGCACAAACACGCACCTC	TP53_c.824G>A_p.C275Y
TP53_17:7673796_G>A_4	GGCACAAACACGCACCTCA	TP53_c.824G>A_p.C275Y
TP53_17:7673796_G>A_3	GCACAAACACGCACCTCAA	TP53_c.824G>A_p.C275Y
TP53_17:7673796_G>A_2	CACAAACACGCACCTCAAA	TP53_c.824G>A_p.C275Y
TP53_17:7673788_C>T_6	GCCTGTCCTGGGAGAGACC	TP53_c.832C>T	c.715C>T_p.P278S	p.P239S
TP53_17:7673788_C>T_5	CCTGTCCTGGGAGAGACCG	TP53_c.832C>T	c.715C>T_p.P278S	p.P239S
TP53_17:7673788_C>T_4	CTGTCCTGGGAGAGACCGG	TP53_c.832C>T	c.715C>T_p.P278S	p.P239S
TP53_17:7673788_C>T_3	TGTCCTGGGAGAGACCGGC	TP53_c.832C>T	c.715C>T_p.P278S	p.P239S
TP53_17:7673788_C>T_2	GTCCTGGGAGAGACCGGCG	TP53_c.832C>T	c.715C>T_p.P278S	p.P239S
TP53_17:7673787_C>T_6	CCTGTCCTGGGAGAGACCG	TP53_c.833C>T_p.P278L
TP53_17:7673787_C>T_5	CTGTCCTGGGAGAGACCGG	TP53_c.833C>T_p.P278L
TP53_17:7673787_C>T_4	TGTCCTGGGAGAGACCGGC	TP53_c.833C>T_p.P278L
TP53_17:7673787_C>T_3	GTCCTGGGAGAGACCGGCG	TP53_c.833C>T_p.P278L
TP53_17:7673787_C>T_2	TCCTGGGAGAGACCGGCGC	TP53_c.833C>T_p.P278L
TP53_17:7673781_G>A_6	CGGTCTCTCCCAGGACAGG	TP53_c.722G>A_p.R241K
TP53_17:7673781_G>A_5	GGTCTCTCCCAGGACAGGC	TP53_c.722G>A_p.R241K
TP53_17:7673781_G>A_4	GTCTCTCCCAGGACAGGCA	TP53_c.722G>A_p.R241K
TP53_17:7673781_G>A_3	TCTCTCCCAGGACAGGCAC	TP53_c.722G>A_p.R241K
TP53_17:7673781_G>A_2	CTCTCCCAGGACAGGCACA	TP53_c.722G>A_p.R241K
TP53_17:7673776_C>T_6	AGAGACCGGCGCACAGAGG	TP53_c.844C>T	c.727C>T_p.R282W	p.R243W
TP53_17:7673776_C>T_5	GAGACCGGCGCACAGAGGA	TP53_c.844C>T	c.727C>T_p.R282W	p.R243W
TP53_17:7673776_C>T_4	AGACCGGCGCACAGAGGAA	TP53_c.844C>T	c.727C>T_p.R282W	p.R243W
TP53_17:7673776_C>T_3	GACCGGCGCACAGAGGAAG	TP53_c.844C>T	c.727C>T_p.R282W	p.R243W
TP53_17:7673776_C>T_2	ACCGGCGCACAGAGGAAGA	TP53_c.844C>T	c.727C>T_p.R282W	p.R243W
TP53_17:7673767_G>A_6	CTTCCTCTGTGCGCCGGTC	TP53_c.853G>A	c.736G>A_p.E285K	p.E246K
TP53_17:7673767_G>A_5	TTCCTCTGTGCGCCGGTCT	TP53_c.853G>A	c.736G>A_p.E285K	p.E246K
TP53_17:7673767_G>A_4	TCCTCTGTGCGCCGGTCTC	TP53_c.853G>A	c.736G>A_p.E285K	p.E246K
TP53_17:7673767_G>A_3	CCTCTGTGCGCCGGTCTCT	TP53_c.853G>A	c.736G>A_p.E285K	p.E246K
TP53_17:7673767_G>A_2	CTCTGTGCGCCGGTCTCTC	TP53_c.853G>A	c.736G>A_p.E285K	p.E246K
TP53_17:7673764_G>A_6	TCTCTTCCTCTGTGCGCCG	TP53_c.856G>A	c.739G>A_p.E286K	p.E247K
TP53_17:7673764_G>A_5	CTCTTCCTCTGTGCGCCGG	TP53_c.856G>A	c.739G>A_p.E286K	p.E247K
TP53_17:7673764_G>A_4	TCTTCCTCTGTGCGCCGGT	TP53_c.856G>A	c.739G>A_p.E286K	p.E247K
TP53_17:7673764_G>A_3	CTTCCTCTGTGCGCCGGTC	TP53_c.856G>A	c.739G>A_p.E286K	p.E247K
TP53_17:7673764_G>A_2	TTCCTCTGTGCGCCGGTCT	TP53_c.856G>A	c.739G>A_p.E286K	p.E247K
TP53_17:7673704_C>T_6	ACTAAGCGAGGTAAGCAAG	TP53_c.916C>T	c.799C>T_p.R306*	p.R267*
TP53_17:7673704_C>T_5	CTAAGCGAGGTAAGCAAGC	TP53_c.916C>T	c.799C>T_p.R306*	p.R267*
TP53_17:7673704_C>T_4	TAAGCGAGGTAAGCAAGCA	TP53_c.916C>T	c.799C>T_p.R306*	p.R267*
TP53_17:7673704_C>T_3	AAGCGAGGTAAGCAAGCAG	TP53_c.916C>T	c.799C>T_p.R306*	p.R267*
TP53_17:7673704_C>T_2	AGCGAGGTAAGCAAGCAGG	TP53_c.916C>T	c.799C>T_p.R306*	p.R267*
TP53_17:7673579_C>T_6	TCTCCCCAGCCAAAGAAGA	TP53_c.949C>T_p.Q317*
TP53_17:7673579_C>T_5	CTCCCCAGCCAAAGAAGAA	TP53_c.949C>T_p.Q317*
TP53_17:7673579_C>T_4	TCCCCAGCCAAAGAAGAAA	TP53_c.949C>T_p.Q317*
TP53_17:7673579_C>T_3	CCCCAGCCAAAGAAGAAAC	TP53_c.949C>T_p.Q317*
TP53_17:7673579_C>T_2	CCCAGCCAAAGAAGAAACC	TP53_c.949C>T_p.Q317*
TP53_17:7673537_C>T_6	ACCCTTCAGGTACTAAGTC	TP53_c.991C>T_p.Q331*
TP53_17:7673537_C>T_5	CCCTTCAGGTACTAAGTCT	TP53_c.991C>T_p.Q331*
TP53_17:7673537_C>T_4	CCTTCAGGTACTAAGTCTT	TP53_c.991C>T_p.Q331*
TP53_17:7673537_C>T_3	CTTCAGGTACTAAGTCTTG	TP53_c.991C>T_p.Q331*
TP53_17:7673537_C>T_2	TTCAGGTACTAAGTCTTGG	TP53_c.991C>T_p.Q331*
TP53_17:7670700_C>T_6	CGTGAGCGCTTCGAGATGT	TP53_c.1009C>T	c.892C>T_p.R337C	p.R298C
TP53_17:7670700_C>T_5	GTGAGCGCTTCGAGATGTT	TP53_c.1009C>T	c.892C>T_p.R337C	p.R298C
TP53_17:7670700_C>T_4	TGAGCGCTTCGAGATGTTC	TP53_c.1009C>T	c.892C>T_p.R337C	p.R298C
TP53_17:7670700_C>T_3	GAGCGCTTCGAGATGTTCC	TP53_c.1009C>T	c.892C>T_p.R337C	p.R298C
TP53_17:7670700_C>T_2	AGCGCTTCGAGATGTTCCG	TP53_c.1009C>T	c.892C>T_p.R337C	p.R298C
TP53_17:7670699_G>A_6	TCGAAGCGCTCACGCCCAC	TP53_c.1010G>A_p.R337H
TP53_17:7670699_G>A_5	CGAAGCGCTCACGCCCACG	TP53_c.1010G>A_p.R337H
TP53_17:7670699_G>A_4	GAAGCGCTCACGCCCACGG	TP53_c.1010G>A_p.R337H
TP53_17:7670699_G>A_3	AAGCGCTCACGCCCACGGA	TP53_c.1010G>A_p.R337H
TP53_17:7670699_G>A_2	AGCGCTCACGCCCACGGAT	TP53_c.1010G>A_p.R337H
TP53_17:7670685_C>T_6	ATGTTCCGAGAGCTGAATG	TP53_c.1024C>T	c.907C>T_p.R342*	p.R303*
TP53_17:7670685_C>T_5	TGTTCCGAGAGCTGAATGA	TP53_c.1024C>T	c.907C>T_p.R342*	p.R303*
TP53_17:7670685_C>T_4	GTTCCGAGAGCTGAATGAG	TP53_c.1024C>T	c.907C>T_p.R342*	p.R303*
TP53_17:7670685_C>T_3	TTCCGAGAGCTGAATGAGG	TP53_c.1024C>T	c.907C>T_p.R342*	p.R303*
TP53_17:7670685_C>T_2	TCCGAGAGCTGAATGAGGC	TP53_c.1024C>T	c.907C>T_p.R342*	p.R303*
TNS1_2:217836199_G>A_6	TTCTCCCGAGCCTGTACCC	TNS1_c.2645G>A_p.R882Q
TNS1_2:217836199_G>A_5	TCTCCCGAGCCTGTACCCC	TNS1_c.2645G>A_p.R882Q
TNS1_2:217836199_G>A_4	CTCCCGAGCCTGTACCCCT	TNS1_c.2645G>A_p.R882Q
TNS1_2:217836199_G>A_3	TCCCGAGCCTGTACCCCTG	TNS1_c.2645G>A_p.R882Q
TNS1_2:217836199_G>A_2	CCCGAGCCTGTACCCCTGG	TNS1_c.2645G>A_p.R882Q
TNPO3_7:128997499_G>A_6	GTTCCCCCAGTCGGTACCA	TNPO3_c.1048G>A_p.G350R
TNPO3_7:128997499_G>A_5	TTCCCCCAGTCGGTACCAA	TNPO3_c.1048G>A_p.G350R
TNPO3_7:128997499_G>A_4	TCCCCCAGTCGGTACCAAA	TNPO3_c.1048G>A_p.G350R
TNPO3_7:128997499_G>A_3	CCCCCAGTCGGTACCAAAA	TNPO3_c.1048G>A_p.G350R
TNPO3_7:128997499_G>A_2	CCCCAGTCGGTACCAAAAG	TNPO3_c.1048G>A_p.G350R
TNNI3K_1:74353291_G>A_6	CTAGGTCAATGCTCTTGCC	TNNI3K_c.958G>A_p.D320N
TNNI3K_1:74353291_G>A_5	TAGGTCAATGCTCTTGCCA	TNNI3K_c.958G>A_p.D320N
TNNI3K_1:74353291_G>A_4	AGGTCAATGCTCTTGCCAT	TNNI3K_c.958G>A_p.D320N
TNNI3K_1:74353291_G>A_3	GGTCAATGCTCTTGCCATA	TNNI3K_c.958G>A_p.D320N
TNNI3K_1:74353291_G>A_2	GTCAATGCTCTTGCCATAG	TNNI3K_c.958G>A_p.D320N
TNFSF14_19:6667443_C>T_6	GACGGACCTGCAGGCTCCT	TNFSF14_c.226C>T_p.P76S
TNFSF14_19:6667443_C>T_5	ACGGACCTGCAGGCTCCTG	TNFSF14_c.226C>T_p.P76S
TNFSF14_19:6667443_C>T_4	CGGACCTGCAGGCTCCTGG	TNFSF14_c.226C>T_p.P76S
TNFSF14_19:6667443_C>T_3	GGACCTGCAGGCTCCTGGG	TNFSF14_c.226C>T_p.P76S
TNFSF14_19:6667443_C>T_2	GACCTGCAGGCTCCTGGGA	TNFSF14_c.226C>T_p.P76S
TNFAIP3_6:137880131_C>T_6	CCATTCCGTGCCTGGGGAG	TNFAIP3_c.1967C>T_p.P656L
TNFAIP3_6:137880131_C>T_5	CATTCCGTGCCTGGGGAGG	TNFAIP3_c.1967C>T_p.P656L
TNFAIP3_6:137880131_C>T_4	ATTCCGTGCCTGGGGAGGG	TNFAIP3_c.1967C>T_p.P656L
TNFAIP3_6:137880131_C>T_3	TTCCGTGCCTGGGGAGGGA	TNFAIP3_c.1967C>T_p.P656L
TNFAIP3_6:137880131_C>T_2	TCCGTGCCTGGGGAGGGAA	TNFAIP3_c.1967C>T_p.P656L
TNC_9:115087162_G>A_6	CCTGGACATTCGGGCTCAG	TNC_c.569G>A_p.C190Y
TNC_9:115087162_G>A_5	CTGGACATTCGGGCTCAGA	TNC_c.569G>A_p.C190Y
TNC_9:115087162_G>A_4	TGGACATTCGGGCTCAGAG	TNC_c.569G>A_p.C190Y
TNC_9:115087162_G>A_3	GGACATTCGGGCTCAGAGC	TNC_c.569G>A_p.C190Y
TNC_9:115087162_G>A_2	GACATTCGGGCTCAGAGCA	TNC_c.569G>A_p.C190Y
TNC_9:115086950_G>A_6	ATGTGCCGTGCTCCTCACT	TNC_c.781G>A_p.G261S
TNC_9:115086950_G>A_5	TGTGCCGTGCTCCTCACTG	TNC_c.781G>A_p.G261S
TNC_9:115086950_G>A_4	GTGCCGTGCTCCTCACTGC	TNC_c.781G>A_p.G261S
TNC_9:115086950_G>A_3	TGCCGTGCTCCTCACTGCA	TNC_c.781G>A_p.G261S
TNC_9:115086950_G>A_2	GCCGTGCTCCTCACTGCAG	TNC_c.781G>A_p.G261S
TMPRSS2_21:41479260_G>A_6	CTATTCCTTGGCTAGAGTA	TMPRSS2_c.706G>A_p.G236R
TMPRSS2_21:41479260_G>A_5	TATTCCTTGGCTAGAGTAA	TMPRSS2_c.706G>A_p.G236R
TMPRSS2_21:41479260_G>A_4	ATTCCTTGGCTAGAGTAAA	TMPRSS2_c.706G>A_p.G236R
TMPRSS2_21:41479260_G>A_3	TTCCTTGGCTAGAGTAAAA	TMPRSS2_c.706G>A_p.G236R
TMPRSS2_21:41479260_G>A_2	TCCTTGGCTAGAGTAAAAA	TMPRSS2_c.706G>A_p.G236R
TMPO_12:98527997_C>T_6	GTGAATCCTGGTCCTATTG	TMPO_c.391C>T_p.P131S
TMPO_12:98527997_C>T_5	TGAATCCTGGTCCTATTGT	TMPO_c.391C>T_p.P131S
TMPO_12:98527997_C>T_4	GAATCCTGGTCCTATTGTG	TMPO_c.391C>T_p.P131S
TMPO_12:98527997_C>T_3	AATCCTGGTCCTATTGTGG	TMPO_c.391C>T_p.P131S
TMPO_12:98527997_C>T_2	ATCCTGGTCCTATTGTGGG	TMPO_c.391C>T_p.P131S
TMIE_3:46705859_C>T_6	GACATGCGCCTGTGGCACG	TMIE_c.163C>T_p.R55C
TMIE_3:46705859_C>T_5	ACATGCGCCTGTGGCACGT	TMIE_c.163C>T_p.R55C
TMIE_3:46705859_C>T_4	CATGCGCCTGTGGCACGTG	TMIE_c.163C>T_p.R55C
TMIE_3:46705859_C>T_3	ATGCGCCTGTGGCACGTGG	TMIE_c.163C>T_p.R55C
TMIE_3:46705859_C>T_2	TGCGCCTGTGGCACGTGGT	TMIE_c.163C>T_p.R55C
TMF1_3:69048113_G>A_6	CACTTTCAGATACTTTCAA	TMF1_c.592G>A_p.E198K
TMF1_3:69048113_G>A_5	ACTTTCAGATACTTTCAAA	TMF1_c.592G>A_p.E198K
TMF1_3:69048113_G>A_4	CTTTCAGATACTTTCAAAC	TMF1_c.592G>A_p.E198K
TMF1_3:69048113_G>A_3	TTTCAGATACTTTCAAACT	TMF1_c.592G>A_p.E198K
TMF1_3:69048113_G>A_2	TTCAGATACTTTCAAACTT	TMF1_c.592G>A_p.E198K
TMEM94_17:75497116_C>T_6	TAGTTCCTTTCTTGCCTGG	TMEM94_c.3355C>T_p.L1119F
TMEM94_17:75497116_C>T_5	AGTTCCTTTCTTGCCTGGT	TMEM94_c.3355C>T_p.L1119F
TMEM94_17:75497116_C>T_4	GTTCCTTTCTTGCCTGGTC	TMEM94_c.3355C>T_p.L1119F
TMEM94_17:75497116_C>T_3	TTCCTTTCTTGCCTGGTCC	TMEM94_c.3355C>T_p.L1119F
TMEM94_17:75497116_C>T_2	TCCTTTCTTGCCTGGTCCA	TMEM94_c.3355C>T_p.L1119F
TMEM94_17:75488876_C>T_6	CTTTTCCGTGTCCTTGAGA	TMEM94_c.760C>T_p.R254C
TMEM94_17:75488876_C>T_5	TTTTCCGTGTCCTTGAGAC	TMEM94_c.760C>T_p.R254C
TMEM94_17:75488876_C>T_4	TTTCCGTGTCCTTGAGACC	TMEM94_c.760C>T_p.R254C
TMEM94_17:75488876_C>T_3	TTCCGTGTCCTTGAGACCC	TMEM94_c.760C>T_p.R254C
TMEM94_17:75488876_C>T_2	TCCGTGTCCTTGAGACCCC	TMEM94_c.760C>T_p.R254C
TMEM270_7:73865083_C>T_6	GAGGCCCGGGGGTCCTGTA	TMEM270_c.163C>T_p.R55W
TMEM270_7:73865083_C>T_5	AGGCCCGGGGGTCCTGTAA	TMEM270_c.163C>T_p.R55W
TMEM270_7:73865083_C>T_4	GGCCCGGGGGTCCTGTAAC	TMEM270_c.163C>T_p.R55W
TMEM270_7:73865083_C>T_3	GCCCGGGGGTCCTGTAACT	TMEM270_c.163C>T_p.R55W
TMEM270_7:73865083_C>T_2	CCCGGGGGTCCTGTAACTG	TMEM270_c.163C>T_p.R55W
TMEM269_1:42793624_G>A_6	TGAAGACGGCAAAGTCATT	TMEM269_c.289G>A_p.V97I
TMEM269_1:42793624_G>A_5	GAAGACGGCAAAGTCATTC	TMEM269_c.289G>A_p.V97I
TMEM269_1:42793624_G>A_4	AAGACGGCAAAGTCATTCA	TMEM269_c.289G>A_p.V97I
TMEM269_1:42793624_G>A_3	AGACGGCAAAGTCATTCAG	TMEM269_c.289G>A_p.V97I
TMEM269_1:42793624_G>A_2	GACGGCAAAGTCATTCAGC	TMEM269_c.289G>A_p.V97I
TMEM200C_18:5891138_C>T_6	CTTCCCCGCGCTGTCCGCG	TMEM200C_c.926C>T_p.P309L
TMEM200C_18:5891138_C>T_5	TTCCCCGCGCTGTCCGCGG	TMEM200C_c.926C>T_p.P309L
TMEM200C_18:5891138_C>T_4	TCCCCGCGCTGTCCGCGGG	TMEM200C_c.926C>T_p.P309L
TMEM200C_18:5891138_C>T_3	CCCCGCGCTGTCCGCGGGA	TMEM200C_c.926C>T_p.P309L
TMEM200C_18:5891138_C>T_2	CCCGCGCTGTCCGCGGGAG	TMEM200C_c.926C>T_p.P309L
TMEM169_2:216100384_C>T_6	GCTGCCCGGGACATGGAGA	TMEM169_c.736C>T_p.R246W
TMEM169_2:216100384_C>T_5	CTGCCCGGGACATGGAGAA	TMEM169_c.736C>T_p.R246W
TMEM169_2:216100384_C>T_4	TGCCCGGGACATGGAGAAA	TMEM169_c.736C>T_p.R246W
TMEM169_2:216100384_C>T_3	GCCCGGGACATGGAGAAAG	TMEM169_c.736C>T_p.R246W
TMEM169_2:216100384_C>T_2	CCCGGGACATGGAGAAAGG	TMEM169_c.736C>T_p.R246W
TMEM161A_19:19121562_G>A_6	GTGCGTCCCGGTGGGTCTG	TMEM161A_c.763G>A_p.D255N
TMEM161A_19:19121562_G>A_5	TGCGTCCCGGTGGGTCTGG	TMEM161A_c.763G>A_p.D255N
TMEM161A_19:19121562_G>A_4	GCGTCCCGGTGGGTCTGGG	TMEM161A_c.763G>A_p.D255N
TMEM161A_19:19121562_G>A_3	CGTCCCGGTGGGTCTGGGC	TMEM161A_c.763G>A_p.D255N
TMEM161A_19:19121562_G>A_2	GTCCCGGTGGGTCTGGGCC	TMEM161A_c.763G>A_p.D255N
TMEM131_2:97888086_C>T_6	CCCATACGATTTGAGCCAC	TMEM131_c.325C>T_p.R109*
TMEM131_2:97888086_C>T_5	CCATACGATTTGAGCCACC	TMEM131_c.325C>T_p.R109*
TMEM131_2:97888086_C>T_4	CATACGATTTGAGCCACCA	TMEM131_c.325C>T_p.R109*
TMEM131_2:97888086_C>T_3	ATACGATTTGAGCCACCAA	TMEM131_c.325C>T_p.R109*
TMEM131_2:97888086_C>T_2	TACGATTTGAGCCACCAAT	TMEM131_c.325C>T_p.R109*
TMEM121B_22:17119525_G>A_6	GAGCACCGTAGCCCCCTCT	TMEM121B_c.1603G>A_p.G535S
TMEM121B_22:17119525_G>A_5	AGCACCGTAGCCCCCTCTG	TMEM121B_c.1603G>A_p.G535S
TMEM121B_22:17119525_G>A_4	GCACCGTAGCCCCCTCTGG	TMEM121B_c.1603G>A_p.G535S
TMEM121B_22:17119525_G>A_3	CACCGTAGCCCCCTCTGGC	TMEM121B_c.1603G>A_p.G535S
TMEM121B_22:17119525_G>A_2	ACCGTAGCCCCCTCTGGCC	TMEM121B_c.1603G>A_p.G535S
TMEM117_12:44299627_C>T_6	TTACAACGGACTGGATCAG	TMEM117_c.656C>T_p.T219M
TMEM117_12:44299627_C>T_5	TACAACGGACTGGATCAGC	TMEM117_c.656C>T_p.T219M
TMEM117_12:44299627_C>T_4	ACAACGGACTGGATCAGCT	TMEM117_c.656C>T_p.T219M
TMEM117_12:44299627_C>T_3	CAACGGACTGGATCAGCTG	TMEM117_c.656C>T_p.T219M
TMEM117_12:44299627_C>T_2	AACGGACTGGATCAGCTGG	TMEM117_c.656C>T_p.T219M
TMCO6_5:140642646_G>A_6	CTTCCTCAGCCTGTAGAAG	TMCO6_c.664G>A_p.E222K
TMCO6_5:140642646_G>A_5	TTCCTCAGCCTGTAGAAGC	TMCO6_c.664G>A_p.E222K
TMCO6_5:140642646_G>A_4	TCCTCAGCCTGTAGAAGCT	TMCO6_c.664G>A_p.E222K
TMCO6_5:140642646_G>A_3	CCTCAGCCTGTAGAAGCTG	TMCO6_c.664G>A_p.E222K
TMCO6_5:140642646_G>A_2	CTCAGCCTGTAGAAGCTGG	TMCO6_c.664G>A_p.E222K
TMCC3_12:94581985_G>A_6	TTATTCCGGATCAGGTTGG	TMCC3_c.632G>A_p.R211Q
TMCC3_12:94581985_G>A_5	TATTCCGGATCAGGTTGGC	TMCC3_c.632G>A_p.R211Q
TMCC3_12:94581985_G>A_4	ATTCCGGATCAGGTTGGCA	TMCC3_c.632G>A_p.R211Q
TMCC3_12:94581985_G>A_3	TTCCGGATCAGGTTGGCAA	TMCC3_c.632G>A_p.R211Q
TMCC3_12:94581985_G>A_2	TCCGGATCAGGTTGGCAAA	TMCC3_c.632G>A_p.R211Q
TMC3_15:81332730_G>A_6	AATCTTCATTCCACGACTT	TMC3_c.2992G>A_p.E998K
TMC3_15:81332730_G>A_5	ATCTTCATTCCACGACTTG	TMC3_c.2992G>A_p.E998K
TMC3_15:81332730_G>A_4	TCTTCATTCCACGACTTGT	TMC3_c.2992G>A_p.E998K
TMC3_15:81332730_G>A_3	CTTCATTCCACGACTTGTA	TMC3_c.2992G>A_p.E998K
TMC3_15:81332730_G>A_2	TTCATTCCACGACTTGTAG	TMC3_c.2992G>A_p.E998K
TLR9_3:52222707_C>T_6	CTCTACCACGAGCACTCAT	TLR9_c.1609C>T_p.H537Y
TLR9_3:52222707_C>T_5	TCTACCACGAGCACTCATT	TLR9_c.1609C>T_p.H537Y
TLR9_3:52222707_C>T_4	CTACCACGAGCACTCATTC	TLR9_c.1609C>T_p.H537Y
TLR9_3:52222707_C>T_3	TACCACGAGCACTCATTCA	TLR9_c.1609C>T_p.H537Y
TLR9_3:52222707_C>T_2	ACCACGAGCACTCATTCAC	TLR9_c.1609C>T_p.H537Y
TLR6_4:38828375_G>A_6	TACTATCTGTGAAAACGTT	TLR6_c.1099G>A_p.D367N
TLR6_4:38828375_G>A_5	ACTATCTGTGAAAACGTTC	TLR6_c.1099G>A_p.D367N
TLR6_4:38828375_G>A_4	CTATCTGTGAAAACGTTCT	TLR6_c.1099G>A_p.D367N
TLR6_4:38828375_G>A_3	TATCTGTGAAAACGTTCTG	TLR6_c.1099G>A_p.D367N
TLR6_4:38828375_G>A_2	ATCTGTGAAAACGTTCTGG	TLR6_c.1099G>A_p.D367N
TLE6_19:2994076_C>T_6	TGCCGGCGGGGACAAAAGT	TLE6_c.1595C>T_p.A532V
TLE6_19:2994076_C>T_5	GCCGGCGGGGACAAAAGTG	TLE6_c.1595C>T_p.A532V
TLE6_19:2994076_C>T_4	CCGGCGGGGACAAAAGTGT	TLE6_c.1595C>T_p.A532V
TLE6_19:2994076_C>T_3	CGGCGGGGACAAAAGTGTT	TLE6_c.1595C>T_p.A532V
TLE6_19:2994076_C>T_2	GGCGGGGACAAAAGTGTTC	TLE6_c.1595C>T_p.A532V
TJP3_19:3736181_C>T_6	GACACGCGTGTGGTCCGCT	TJP3_c.1171C>T_p.R391C
TJP3_19:3736181_C>T_5	ACACGCGTGTGGTCCGCTT	TJP3_c.1171C>T_p.R391C
TJP3_19:3736181_C>T_4	CACGCGTGTGGTCCGCTTC	TJP3_c.1171C>T_p.R391C
TJP3_19:3736181_C>T_3	ACGCGTGTGGTCCGCTTCC	TJP3_c.1171C>T_p.R391C
TJP3_19:3736181_C>T_2	CGCGTGTGGTCCGCTTCCT	TJP3_c.1171C>T_p.R391C
THBS2_6:169232674_C>T_6	CCAAGACGGAAAAGCAAGT	THBS2_c.1922C>T_p.T641M
THBS2_6:169232674_C>T_5	CAAGACGGAAAAGCAAGTA	THBS2_c.1922C>T_p.T641M
THBS2_6:169232674_C>T_4	AAGACGGAAAAGCAAGTAC	THBS2_c.1922C>T_p.T641M
THBS2_6:169232674_C>T_3	AGACGGAAAAGCAAGTACG	THBS2_c.1922C>T_p.T641M
THBS2_6:169232674_C>T_2	GACGGAAAAGCAAGTACGC	THBS2_c.1922C>T_p.T641M
THAP4_2:241634016_G>A_6	GGGAGTCCAGTTATCCCTC	THAP4_c.141G>A_p.W47*
THAP4_2:241634016_G>A_5	GGAGTCCAGTTATCCCTCT	THAP4_c.141G>A_p.W47*
THAP4_2:241634016_G>A_4	GAGTCCAGTTATCCCTCTG	THAP4_c.141G>A_p.W47*
THAP4_2:241634016_G>A_3	AGTCCAGTTATCCCTCTGA	THAP4_c.141G>A_p.W47*
THAP4_2:241634016_G>A_2	GTCCAGTTATCCCTCTGAA	THAP4_c.141G>A_p.W47*
TGM7_15:43287412_G>A_6	AGTCCTCGCCCCAGTTCCC	TGM7_c.733G>A_p.E245K
TGM7_15:43287412_G>A_5	GTCCTCGCCCCAGTTCCCC	TGM7_c.733G>A_p.E245K
TGM7_15:43287412_G>A_4	TCCTCGCCCCAGTTCCCCT	TGM7_c.733G>A_p.E245K
TGM7_15:43287412_G>A_3	CCTCGCCCCAGTTCCCCTG	TGM7_c.733G>A_p.E245K
TGM7_15:43287412_G>A_2	CTCGCCCCAGTTCCCCTGC	TGM7_c.733G>A_p.E245K
TGFBR2_3:30672165_C>T_6	GCCTTCCACGCCAAGGGCA	TGFBR2_c.1057C>T_p.H353Y
TGFBR2_3:30672165_C>T_5	CCTTCCACGCCAAGGGCAA	TGFBR2_c.1057C>T_p.H353Y
TGFBR2_3:30672165_C>T_4	CTTCCACGCCAAGGGCAAC	TGFBR2_c.1057C>T_p.H353Y
TGFBR2_3:30672165_C>T_3	TTCCACGCCAAGGGCAACC	TGFBR2_c.1057C>T_p.H353Y
TGFBR2_3:30672165_C>T_2	TCCACGCCAAGGGCAACCT	TGFBR2_c.1057C>T_p.H353Y
TGFBI_5:136059137_G>A_6	GGATTTCATCACCAATGTG	TGFBI_c.1726G>A_p.E576K
TGFBI_5:136059137_G>A_5	GATTTCATCACCAATGTGG	TGFBI_c.1726G>A_p.E576K
TGFBI_5:136059137_G>A_4	ATTTCATCACCAATGTGGT	TGFBI_c.1726G>A_p.E576K
TGFBI_5:136059137_G>A_3	TTTCATCACCAATGTGGTA	TGFBI_c.1726G>A_p.E576K
TGFBI_5:136059137_G>A_2	TTCATCACCAATGTGGTAT	TGFBI_c.1726G>A_p.E576K
TGFB1_19:41352959_G>A_6	GATAGTCCCGCGGCCGGCC	TGFB1_c.86G>A_p.G29E
TGFB1_19:41352959_G>A_5	ATAGTCCCGCGGCCGGCCG	TGFB1_c.86G>A_p.G29E
TGFB1_19:41352959_G>A_4	TAGTCCCGCGGCCGGCCGG	TGFB1_c.86G>A_p.G29E
TGFB1_19:41352959_G>A_3	AGTCCCGCGGCCGGCCGGC	TGFB1_c.86G>A_p.G29E
TGFB1_19:41352959_G>A_2	GTCCCGCGGCCGGCCGGCC	TGFB1_c.86G>A_p.G29E
TFR2_7:100641503_C>T_6	ATGGAGCGGCTTTGGGGTC	TFR2_c.7C>T_p.R3W
TFR2_7:100641503_C>T_5	TGGAGCGGCTTTGGGGTCT	TFR2_c.7C>T_p.R3W
TFR2_7:100641503_C>T_4	GGAGCGGCTTTGGGGTCTA	TFR2_c.7C>T_p.R3W
TFR2_7:100641503_C>T_3	GAGCGGCTTTGGGGTCTAT	TFR2_c.7C>T_p.R3W
TFR2_7:100641503_C>T_2	AGCGGCTTTGGGGTCTATT	TFR2_c.7C>T_p.R3W
TEX264_3:51703919_G>A_6	AAGGGCCCCTCGCCCTCCA	TEX264_c.845G>A_p.G282E
TEX264_3:51703919_G>A_5	AGGGCCCCTCGCCCTCCAA	TEX264_c.845G>A_p.G282E
TEX264_3:51703919_G>A_4	GGGCCCCTCGCCCTCCAAG	TEX264_c.845G>A_p.G282E
TEX264_3:51703919_G>A_3	GGCCCCTCGCCCTCCAAGT	TEX264_c.845G>A_p.G282E
TEX264_3:51703919_G>A_2	GCCCCTCGCCCTCCAAGTC	TEX264_c.845G>A_p.G282E
TEX2_17:64154876_G>A_6	CTCCCCCGCTGGGCTCTGG	TEX2_c.2917G>A_p.G973R
TEX2_17:64154876_G>A_5	TCCCCCGCTGGGCTCTGGG	TEX2_c.2917G>A_p.G973R
TEX2_17:64154876_G>A_4	CCCCCGCTGGGCTCTGGGG	TEX2_c.2917G>A_p.G973R
TEX2_17:64154876_G>A_3	CCCCGCTGGGCTCTGGGGC	TEX2_c.2917G>A_p.G973R
TEX2_17:64154876_G>A_2	CCCGCTGGGCTCTGGGGCA	TEX2_c.2917G>A_p.G973R
TEX14_17:58599079_G>A_6	CTTCATCTAATATCTGCTC	TEX14_c.2284G>A_p.D762N
TEX14_17:58599079_G>A_5	TTCATCTAATATCTGCTCG	TEX14_c.2284G>A_p.D762N
TEX14_17:58599079_G>A_4	TCATCTAATATCTGCTCGA	TEX14_c.2284G>A_p.D762N
TEX14_17:58599079_G>A_3	CATCTAATATCTGCTCGAT	TEX14_c.2284G>A_p.D762N
TEX14_17:58599079_G>A_2	ATCTAATATCTGCTCGATA	TEX14_c.2284G>A_p.D762N
TESK1_9:35605717_C>T_6	GAGGCCCGGGCCGGGGCCG	TESK1_c.98C>T_p.P33L
TESK1_9:35605717_C>T_5	AGGCCCGGGCCGGGGCCGC	TESK1_c.98C>T_p.P33L
TESK1_9:35605717_C>T_4	GGCCCGGGCCGGGGCCGCC	TESK1_c.98C>T_p.P33L
TESK1_9:35605717_C>T_3	GCCCGGGCCGGGGCCGCCC	TESK1_c.98C>T_p.P33L
TESK1_9:35605717_C>T_2	CCCGGGCCGGGGCCGCCCC	TESK1_c.98C>T_p.P33L
TENM4_11:78729415_G>A_6	TGTAGACGTCTGTCTTGTC	TENM4_c.3367G>A_p.V1123I
TENM4_11:78729415_G>A_5	GTAGACGTCTGTCTTGTCC	TENM4_c.3367G>A_p.V1123I
TENM4_11:78729415_G>A_4	TAGACGTCTGTCTTGTCCC	TENM4_c.3367G>A_p.V1123I
TENM4_11:78729415_G>A_3	AGACGTCTGTCTTGTCCCA	TENM4_c.3367G>A_p.V1123I
TENM4_11:78729415_G>A_2	GACGTCTGTCTTGTCCCAA	TENM4_c.3367G>A_p.V1123I
TENM1_X:124453429_G>A_6	TCTCATCAATTTTGCGAAT	TENM1_c.4012G>A_p.D1338N
TENM1_X:124453429_G>A_5	CTCATCAATTTTGCGAATC	TENM1_c.4012G>A_p.D1338N
TENM1_X:124453429_G>A_4	TCATCAATTTTGCGAATCA	TENM1_c.4012G>A_p.D1338N
TENM1_X:124453429_G>A_3	CATCAATTTTGCGAATCAT	TENM1_c.4012G>A_p.D1338N
TENM1_X:124453429_G>A_2	ATCAATTTTGCGAATCATA	TENM1_c.4012G>A_p.D1338N
TECTA_11:121137522_G>A_6	ATCCCTCAGAGCAGCTATC	TECTA_c.3043G>A_p.E1015K
TECTA_11:121137522_G>A_5	TCCCTCAGAGCAGCTATCC	TECTA_c.3043G>A_p.E1015K
TECTA_11:121137522_G>A_4	CCCTCAGAGCAGCTATCCA	TECTA_c.3043G>A_p.E1015K
TECTA_11:121137522_G>A_3	CCTCAGAGCAGCTATCCAC	TECTA_c.3043G>A_p.E1015K
TECTA_11:121137522_G>A_2	CTCAGAGCAGCTATCCACG	TECTA_c.3043G>A_p.E1015K
TECPR2_14:102497608_G>A_6	CCCACACGGTCCTGGTGCT	TECPR2_c.3970G>A_p.V1324M
TECPR2_14:102497608_G>A_5	CCACACGGTCCTGGTGCTC	TECPR2_c.3970G>A_p.V1324M
TECPR2_14:102497608_G>A_4	CACACGGTCCTGGTGCTCA	TECPR2_c.3970G>A_p.V1324M
TECPR2_14:102497608_G>A_3	ACACGGTCCTGGTGCTCAG	TECPR2_c.3970G>A_p.V1324M
TECPR2_14:102497608_G>A_2	CACGGTCCTGGTGCTCAGC	TECPR2_c.3970G>A_p.V1324M
TECPR2_14:102452462_C>T_6	CAGTCGCGGCCCTCCACGG	TECPR2_c.3475C>T_p.R1159W
TECPR2_14:102452462_C>T_5	AGTCGCGGCCCTCCACGGT	TECPR2_c.3475C>T_p.R1159W
TECPR2_14:102452462_C>T_4	GTCGCGGCCCTCCACGGTG	TECPR2_c.3475C>T_p.R1159W
TECPR2_14:102452462_C>T_3	TCGCGGCCCTCCACGGTGC	TECPR2_c.3475C>T_p.R1159W
TECPR2_14:102452462_C>T_2	CGCGGCCCTCCACGGTGCA	TECPR2_c.3475C>T_p.R1159W
TDRD15_2:21140121_G>A_6	AAGTCTCTGAATGCTTTTC	TDRD15_c.2654G>A_p.R885K
TDRD15_2:21140121_G>A_5	AGTCTCTGAATGCTTTTCT	TDRD15_c.2654G>A_p.R885K
TDRD15_2:21140121_G>A_4	GTCTCTGAATGCTTTTCTT	TDRD15_c.2654G>A_p.R885K
TDRD15_2:21140121_G>A_3	TCTCTGAATGCTTTTCTTG	TDRD15_c.2654G>A_p.R885K
TDRD15_2:21140121_G>A_2	CTCTGAATGCTTTTCTTGT	TDRD15_c.2654G>A_p.R885K
TCTN1_12:110641147_C>T_6	TTTCTTCAGGTAAGGTTGA	TCTN1_c.1102C>T_p.Q368*
TCTN1_12:110641147_C>T_5	TTCTTCAGGTAAGGTTGAT	TCTN1_c.1102C>T_p.Q368*
TCTN1_12:110641147_C>T_4	TCTTCAGGTAAGGTTGATC	TCTN1_c.1102C>T_p.Q368*
TCTN1_12:110641147_C>T_3	CTTCAGGTAAGGTTGATCA	TCTN1_c.1102C>T_p.Q368*
TCTN1_12:110641147_C>T_2	TTCAGGTAAGGTTGATCAA	TCTN1_c.1102C>T_p.Q368*
TCTE3_6:169743171_G>A_6	AGTATGCGGTCTGCCAATT	TCTE3_c.395G>A_p.R132H
TCTE3_6:169743171_G>A_5	GTATGCGGTCTGCCAATTC	TCTE3_c.395G>A_p.R132H
TCTE3_6:169743171_G>A_4	TATGCGGTCTGCCAATTCA	TCTE3_c.395G>A_p.R132H
TCTE3_6:169743171_G>A_3	ATGCGGTCTGCCAATTCAA	TCTE3_c.395G>A_p.R132H
TCTE3_6:169743171_G>A_2	TGCGGTCTGCCAATTCAAG	TCTE3_c.395G>A_p.R132H
TCP10L2_6:167179083_G>A_6	GCGTGGCGGCCTGGGAAGC	TCP10L2_c.730G>A_p.A244T
TCP10L2_6:167179083_G>A_5	CGTGGCGGCCTGGGAAGCC	TCP10L2_c.730G>A_p.A244T
TCP10L2_6:167179083_G>A_4	GTGGCGGCCTGGGAAGCCT	TCP10L2_c.730G>A_p.A244T
TCP10L2_6:167179083_G>A_3	TGGCGGCCTGGGAAGCCTG	TCP10L2_c.730G>A_p.A244T
TCP10L2_6:167179083_G>A_2	GGCGGCCTGGGAAGCCTGC	TCP10L2_c.730G>A_p.A244T
TCOF1_5:150364219_G>A_6	CTTCCTCCTCTTCCGAGCT	TCOF1_c.271G>A_p.E91K
TCOF1_5:150364219_G>A_5	TTCCTCCTCTTCCGAGCTC	TCOF1_c.271G>A_p.E91K
TCOF1_5:150364219_G>A_4	TCCTCCTCTTCCGAGCTCT	TCOF1_c.271G>A_p.E91K
TCOF1_5:150364219_G>A_3	CCTCCTCTTCCGAGCTCTC	TCOF1_c.271G>A_p.E91K
TCOF1_5:150364219_G>A_2	CTCCTCTTCCGAGCTCTCC	TCOF1_c.271G>A_p.E91K
TCF7L2_10:113165574_C>T_6	TGCGTTCGCTACATACAAG	TCF7L2_c.1411C>T_p.R471C
TCF7L2_10:113165574_C>T_5	GCGTTCGCTACATACAAGG	TCF7L2_c.1411C>T_p.R471C
TCF7L2_10:113165574_C>T_4	CGTTCGCTACATACAAGGT	TCF7L2_c.1411C>T_p.R471C
TCF7L2_10:113165574_C>T_3	GTTCGCTACATACAAGGTG	TCF7L2_c.1411C>T_p.R471C
TCF7L2_10:113165574_C>T_2	TTCGCTACATACAAGGTGA	TCF7L2_c.1411C>T_p.R471C
TC2N_14:91813747_G>A_6	CAGCAACTCTTTATAAATT	TC2N_c.23G>A_p.S8N
TC2N_14:91813747_G>A_5	AGCAACTCTTTATAAATTC	TC2N_c.23G>A_p.S8N
TC2N_14:91813747_G>A_4	GCAACTCTTTATAAATTCT	TC2N_c.23G>A_p.S8N
TC2N_14:91813747_G>A_3	CAACTCTTTATAAATTCTG	TC2N_c.23G>A_p.S8N
TC2N_14:91813747_G>A_2	AACTCTTTATAAATTCTGT	TC2N_c.23G>A_p.S8N
TBXT_6:166158359_C>T_6	CAAGGCCGCCTCATAGCCT	TBXT_c.1264C>T_p.R422C
TBXT_6:166158359_C>T_5	AAGGCCGCCTCATAGCCTC	TBXT_c.1264C>T_p.R422C
TBXT_6:166158359_C>T_4	AGGCCGCCTCATAGCCTCA	TBXT_c.1264C>T_p.R422C
TBXT_6:166158359_C>T_3	GGCCGCCTCATAGCCTCAT	TBXT_c.1264C>T_p.R422C
TBXT_6:166158359_C>T_2	GCCGCCTCATAGCCTCATG	TBXT_c.1264C>T_p.R422C
TBX6_16:30086675_G>A_6	TGGAGTCGCAGGGACCACC	TBX6_c.934G>A_p.D312N
TBX6_16:30086675_G>A_5	GGAGTCGCAGGGACCACCT	TBX6_c.934G>A_p.D312N
TBX6_16:30086675_G>A_4	GAGTCGCAGGGACCACCTG	TBX6_c.934G>A_p.D312N
TBX6_16:30086675_G>A_3	AGTCGCAGGGACCACCTGG	TBX6_c.934G>A_p.D312N
TBX6_16:30086675_G>A_2	GTCGCAGGGACCACCTGGT	TBX6_c.934G>A_p.D312N
TBX22_X:80022283_C>T_6	TGAGCTCTCGGGCGCGTGC	TBX22_c.14C>T_p.S5F
TBX22_X:80022283_C>T_5	GAGCTCTCGGGCGCGTGCC	TBX22_c.14C>T_p.S5F
TBX22_X:80022283_C>T_4	AGCTCTCGGGCGCGTGCCT	TBX22_c.14C>T_p.S5F
TBX22_X:80022283_C>T_3	GCTCTCGGGCGCGTGCCTT	TBX22_c.14C>T_p.S5F
TBX22_X:80022283_C>T_2	CTCTCGGGCGCGTGCCTTC	TBX22_c.14C>T_p.S5F
TBX19_1:168281166_G>A_6	GAAGCTCACTCTCCACCAC	TBX19_c.76G>A_p.E26K
TBX19_1:168281166_G>A_5	AAGCTCACTCTCCACCACA	TBX19_c.76G>A_p.E26K
TBX19_1:168281166_G>A_4	AGCTCACTCTCCACCACAT	TBX19_c.76G>A_p.E26K
TBX19_1:168281166_G>A_3	GCTCACTCTCCACCACATT	TBX19_c.76G>A_p.E26K
TBX19_1:168281166_G>A_2	CTCACTCTCCACCACATTG	TBX19_c.76G>A_p.E26K
TBR1_2:161423686_C>T_6	ACACGGCCACGGACTTCGC	TBR1_c.1508C>T_p.A503V
TBR1_2:161423686_C>T_5	CACGGCCACGGACTTCGCG	TBR1_c.1508C>T_p.A503V
TBR1_2:161423686_C>T_4	ACGGCCACGGACTTCGCGG	TBR1_c.1508C>T_p.A503V
TBR1_2:161423686_C>T_3	CGGCCACGGACTTCGCGGG	TBR1_c.1508C>T_p.A503V
TBR1_2:161423686_C>T_2	GGCCACGGACTTCGCGGGC	TBR1_c.1508C>T_p.A503V
TBC1D10A_22:30293948_C>T_6	GTGCTGCGTGTCTGGGACA	TBC1D10A_c.889C>T_p.R297C
TBC1D10A_22:30293948_C>T_5	TGCTGCGTGTCTGGGACAT	TBC1D10A_c.889C>T_p.R297C
TBC1D10A_22:30293948_C>T_4	GCTGCGTGTCTGGGACATG	TBC1D10A_c.889C>T_p.R297C
TBC1D10A_22:30293948_C>T_3	CTGCGTGTCTGGGACATGT	TBC1D10A_c.889C>T_p.R297C
TBC1D10A_22:30293948_C>T_2	TGCGTGTCTGGGACATGTT	TBC1D10A_c.889C>T_p.R297C
TAS2R13_12:10908536_G>A_6	ACAGCTCAGAAATCCATGA	TAS2R13_c.763G>A_p.E255K
TAS2R13_12:10908536_G>A_5	CAGCTCAGAAATCCATGAT	TAS2R13_c.763G>A_p.E255K
TAS2R13_12:10908536_G>A_4	AGCTCAGAAATCCATGATA	TAS2R13_c.763G>A_p.E255K
TAS2R13_12:10908536_G>A_3	GCTCAGAAATCCATGATAT	TAS2R13_c.763G>A_p.E255K
TAS2R13_12:10908536_G>A_2	CTCAGAAATCCATGATATG	TAS2R13_c.763G>A_p.E255K
TAS1R1_1:6574641_C>T_6	GCTATGCGGCCAGCAGCGA	TAS1R1_c.509C>T_p.A170V
TAS1R1_1:6574641_C>T_5	CTATGCGGCCAGCAGCGAG	TAS1R1_c.509C>T_p.A170V
TAS1R1_1:6574641_C>T_4	TATGCGGCCAGCAGCGAGA	TAS1R1_c.509C>T_p.A170V
TAS1R1_1:6574641_C>T_3	ATGCGGCCAGCAGCGAGAC	TAS1R1_c.509C>T_p.A170V
TAS1R1_1:6574641_C>T_2	TGCGGCCAGCAGCGAGACG	TAS1R1_c.509C>T_p.A170V
TANC2_17:63194056_C>T_6	ATGACTCGTCTGGGTTTCC	TANC2_c.277C>T_p.R93C
TANC2_17:63194056_C>T_5	TGACTCGTCTGGGTTTCCT	TANC2_c.277C>T_p.R93C
TANC2_17:63194056_C>T_4	GACTCGTCTGGGTTTCCTC	TANC2_c.277C>T_p.R93C
TANC2_17:63194056_C>T_3	ACTCGTCTGGGTTTCCTCC	TANC2_c.277C>T_p.R93C
TANC2_17:63194056_C>T_2	CTCGTCTGGGTTTCCTCCT	TANC2_c.277C>T_p.R93C
TANC1_2:159194416_G>A_6	TCATGCCGTTCTCTGACGT	TANC1_c.2902G>A_p.G968S
TANC1_2:159194416_G>A_5	CATGCCGTTCTCTGACGTT	TANC1_c.2902G>A_p.G968S
TANC1_2:159194416_G>A_4	ATGCCGTTCTCTGACGTTC	TANC1_c.2902G>A_p.G968S
TANC1_2:159194416_G>A_3	TGCCGTTCTCTGACGTTCC	TANC1_c.2902G>A_p.G968S
TANC1_2:159194416_G>A_2	GCCGTTCTCTGACGTTCCG	TANC1_c.2902G>A_p.G968S
TAB2_6:149378480_C>T_6	ACTGGTCGTAATACTCCTA	TAB2_c.565C>T_p.R189C
TAB2_6:149378480_C>T_5	CTGGTCGTAATACTCCTAC	TAB2_c.565C>T_p.R189C
TAB2_6:149378480_C>T_4	TGGTCGTAATACTCCTACA	TAB2_c.565C>T_p.R189C
TAB2_6:149378480_C>T_3	GGTCGTAATACTCCTACAT	TAB2_c.565C>T_p.R189C
TAB2_6:149378480_C>T_2	GTCGTAATACTCCTACATC	TAB2_c.565C>T_p.R189C
TAB1_22:39419626_C>T_6	GACCTTCTCAGGTAGGTGC	TAB1_c.772C>T_p.L258F
TAB1_22:39419626_C>T_5	ACCTTCTCAGGTAGGTGCC	TAB1_c.772C>T_p.L258F
TAB1_22:39419626_C>T_4	CCTTCTCAGGTAGGTGCCA	TAB1_c.772C>T_p.L258F
TAB1_22:39419626_C>T_3	CTTCTCAGGTAGGTGCCAG	TAB1_c.772C>T_p.L258F
TAB1_22:39419626_C>T_2	TTCTCAGGTAGGTGCCAGC	TAB1_c.772C>T_p.L258F
SZT2_1:43446396_G>A_6	CCTGCCCCATTGGGATTCG	SZT2_c.8881G>A_p.G2961R
SZT2_1:43446396_G>A_5	CTGCCCCATTGGGATTCGG	SZT2_c.8881G>A_p.G2961R
SZT2_1:43446396_G>A_4	TGCCCCATTGGGATTCGGG	SZT2_c.8881G>A_p.G2961R
SZT2_1:43446396_G>A_3	GCCCCATTGGGATTCGGGA	SZT2_c.8881G>A_p.G2961R
SZT2_1:43446396_G>A_2	CCCCATTGGGATTCGGGAA	SZT2_c.8881G>A_p.G2961R
SYTL1_1:27353471_G>A_6	CTGAGGCGTGTGCCCCCCA	SYTL1_c.1532G>A_p.R511H
SYTL1_1:27353471_G>A_5	TGAGGCGTGTGCCCCCCAG	SYTL1_c.1532G>A_p.R511H
SYTL1_1:27353471_G>A_4	GAGGCGTGTGCCCCCCAGC	SYTL1_c.1532G>A_p.R511H
SYTL1_1:27353471_G>A_3	AGGCGTGTGCCCCCCAGCT	SYTL1_c.1532G>A_p.R511H
SYTL1_1:27353471_G>A_2	GGCGTGTGCCCCCCAGCTG	SYTL1_c.1532G>A_p.R511H
SYT5_19:55175201_C>T_6	GCCTGGCGGGAGCTGCAGG	SYT5_c.679C>T_p.R227W
SYT5_19:55175201_C>T_5	CCTGGCGGGAGCTGCAGGC	SYT5_c.679C>T_p.R227W
SYT5_19:55175201_C>T_4	CTGGCGGGAGCTGCAGGCG	SYT5_c.679C>T_p.R227W
SYT5_19:55175201_C>T_3	TGGCGGGAGCTGCAGGCGG	SYT5_c.679C>T_p.R227W
SYT5_19:55175201_C>T_2	GGCGGGAGCTGCAGGCGGC	SYT5_c.679C>T_p.R227W
SYT4_18:43274205_C>T_6	TTGGAGCAGATGATAAAAA	SYT4_c.224C>T_p.A75V
SYT4_18:43274205_C>T_5	TGGAGCAGATGATAAAAAT	SYT4_c.224C>T_p.A75V
SYT4_18:43274205_C>T_4	GGAGCAGATGATAAAAATG	SYT4_c.224C>T_p.A75V
SYT4_18:43274205_C>T_3	GAGCAGATGATAAAAATGA	SYT4_c.224C>T_p.A75V
SYT4_18:43274205_C>T_2	AGCAGATGATAAAAATGAA	SYT4_c.224C>T_p.A75V
SYNJ1_21:32694296_G>A_6	CTGAGTCATCTAAGTACAC	SYNJ1_c.838G>A_p.D280N
SYNJ1_21:32694296_G>A_5	TGAGTCATCTAAGTACACA	SYNJ1_c.838G>A_p.D280N
SYNJ1_21:32694296_G>A_4	GAGTCATCTAAGTACACAA	SYNJ1_c.838G>A_p.D280N
SYNJ1_21:32694296_G>A_3	AGTCATCTAAGTACACAAC	SYNJ1_c.838G>A_p.D280N
SYNJ1_21:32694296_G>A_2	GTCATCTAAGTACACAACC	SYNJ1_c.838G>A_p.D280N
SYNE2_14:64141967_G>A_6	GCTTTACGAGACGGCAATT	SYNE2_c.15185G>A_p.R5062H
SYNE2_14:64141967_G>A_5	CTTTACGAGACGGCAATTT	SYNE2_c.15185G>A_p.R5062H
SYNE2_14:64141967_G>A_4	TTTACGAGACGGCAATTTC	SYNE2_c.15185G>A_p.R5062H
SYNE2_14:64141967_G>A_3	TTACGAGACGGCAATTTCT	SYNE2_c.15185G>A_p.R5062H
SYNE2_14:64141967_G>A_2	TACGAGACGGCAATTTCTC	SYNE2_c.15185G>A_p.R5062H
SYNE1_6:152505273_C>T_6	TCCAACCGAGAAAATTTGG	SYNE1_c.706C>T_p.R236*
SYNE1_6:152505273_C>T_5	CCAACCGAGAAAATTTGGA	SYNE1_c.706C>T_p.R236*
SYNE1_6:152505273_C>T_4	CAACCGAGAAAATTTGGAG	SYNE1_c.706C>T_p.R236*
SYNE1_6:152505273_C>T_3	AACCGAGAAAATTTGGAGG	SYNE1_c.706C>T_p.R236*
SYNE1_6:152505273_C>T_2	ACCGAGAAAATTTGGAGGA	SYNE1_c.706C>T_p.R236*
SUPT7L_2:27662183_C>T_6	AATCTGCAAAGGTGAGTTG	SUPT7L_c.10C>T_p.Q4*
SUPT7L_2:27662183_C>T_5	ATCTGCAAAGGTGAGTTGA	SUPT7L_c.10C>T_p.Q4*
SUPT7L_2:27662183_C>T_4	TCTGCAAAGGTGAGTTGAA	SUPT7L_c.10C>T_p.Q4*
SUPT7L_2:27662183_C>T_3	CTGCAAAGGTGAGTTGAAA	SUPT7L_c.10C>T_p.Q4*
SUPT7L_2:27662183_C>T_2	TGCAAAGGTGAGTTGAAAC	SUPT7L_c.10C>T_p.Q4*
SUPT6H_17:28675448_C>T_6	AAAAAACCTAAGTGGCGGA	SUPT6H_c.586C>T_p.P196S
SUPT6H_17:28675448_C>T_5	AAAAACCTAAGTGGCGGAA	SUPT6H_c.586C>T_p.P196S
SUPT6H_17:28675448_C>T_4	AAAACCTAAGTGGCGGAAA	SUPT6H_c.586C>T_p.P196S
SUPT6H_17:28675448_C>T_3	AAACCTAAGTGGCGGAAAA	SUPT6H_c.586C>T_p.P196S
SUPT6H_17:28675448_C>T_2	AACCTAAGTGGCGGAAAAA	SUPT6H_c.586C>T_p.P196S
STRBP_9:123136129_C>T_6	AAGTGGCAAAGGCGAGTGC	STRBP_c.1685C>T_p.A562V
STRBP_9:123136129_C>T_5	AGTGGCAAAGGCGAGTGCA	STRBP_c.1685C>T_p.A562V
STRBP_9:123136129_C>T_4	GTGGCAAAGGCGAGTGCAG	STRBP_c.1685C>T_p.A562V
STRBP_9:123136129_C>T_3	TGGCAAAGGCGAGTGCAGC	STRBP_c.1685C>T_p.A562V
STRBP_9:123136129_C>T_2	GGCAAAGGCGAGTGCAGCT	STRBP_c.1685C>T_p.A562V
STK36_2:218680655_G>A_6	GCACCTCTGGCCTCTCCTC	STK36_c.1189G>A_p.E397K
STK36_2:218680655_G>A_5	CACCTCTGGCCTCTCCTCT	STK36_c.1189G>A_p.E397K
STK36_2:218680655_G>A_4	ACCTCTGGCCTCTCCTCTG	STK36_c.1189G>A_p.E397K
STK36_2:218680655_G>A_3	CCTCTGGCCTCTCCTCTGG	STK36_c.1189G>A_p.E397K
STK36_2:218680655_G>A_2	CTCTGGCCTCTCCTCTGGG	STK36_c.1189G>A_p.E397K
STK32A_5:147375134_G>A_6	CAAAATCATTTCCTCAAGT	STK32A_c.948G>A_p.M316I
STK32A_5:147375134_G>A_5	AAAATCATTTCCTCAAGTT	STK32A_c.948G>A_p.M316I
STK32A_5:147375134_G>A_4	AAATCATTTCCTCAAGTTC	STK32A_c.948G>A_p.M316I
STK32A_5:147375134_G>A_3	AATCATTTCCTCAAGTTCA	STK32A_c.948G>A_p.M316I
STK32A_5:147375134_G>A_2	ATCATTTCCTCAAGTTCAA	STK32A_c.948G>A_p.M316I
STK31_7:23781503_C>T_6	ATTTATCATGAGAGAGAGG	STK31_c.2050C>T_p.H684Y
STK31_7:23781503_C>T_5	TTTATCATGAGAGAGAGGA	STK31_c.2050C>T_p.H684Y
STK31_7:23781503_C>T_4	TTATCATGAGAGAGAGGAA	STK31_c.2050C>T_p.H684Y
STK31_7:23781503_C>T_3	TATCATGAGAGAGAGGAAT	STK31_c.2050C>T_p.H684Y
STK31_7:23781503_C>T_2	ATCATGAGAGAGAGGAATA	STK31_c.2050C>T_p.H684Y
STK11_19:1220641_C>T_6	GCTTTCCAGCCGCCCGAGA	STK11_c.658C>T_p.Q220*
STK11_19:1220641_C>T_5	CTTTCCAGCCGCCCGAGAT	STK11_c.658C>T_p.Q220*
STK11_19:1220641_C>T_4	TTTCCAGCCGCCCGAGATT	STK11_c.658C>T_p.Q220*
STK11_19:1220641_C>T_3	TTCCAGCCGCCCGAGATTG	STK11_c.658C>T_p.Q220*
STK11_19:1220641_C>T_2	TCCAGCCGCCCGAGATTGC	STK11_c.658C>T_p.Q220*
STK11_19:1220630_C>T_6	AGGGCTCCCCGGCTTTCCA	STK11_c.647C>T_p.S216F
STK11_19:1220630_C>T_5	GGGCTCCCCGGCTTTCCAG	STK11_c.647C>T_p.S216F
STK11_19:1220630_C>T_4	GGCTCCCCGGCTTTCCAGC	STK11_c.647C>T_p.S216F
STK11_19:1220630_C>T_3	GCTCCCCGGCTTTCCAGCC	STK11_c.647C>T_p.S216F
STK11_19:1220630_C>T_2	CTCCCCGGCTTTCCAGCCG	STK11_c.647C>T_p.S216F
STK11_19:1218424_C>T_6	GAAATTCAACTACTGAGGA	STK11_c.298C>T_p.Q100*
STK11_19:1218424_C>T_5	AAATTCAACTACTGAGGAG	STK11_c.298C>T_p.Q100*
STK11_19:1218424_C>T_4	AATTCAACTACTGAGGAGG	STK11_c.298C>T_p.Q100*
STK11_19:1218424_C>T_3	ATTCAACTACTGAGGAGGT	STK11_c.298C>T_p.Q100*
STK11_19:1218424_C>T_2	TTCAACTACTGAGGAGGTT	STK11_c.298C>T_p.Q100*
STARD9_15:42693672_G>A_6	CAGGCACAAAGCTGTTGCC	STARD9_c.12094G>A_p.V4032M
STARD9_15:42693672_G>A_5	AGGCACAAAGCTGTTGCCC	STARD9_c.12094G>A_p.V4032M
STARD9_15:42693672_G>A_4	GGCACAAAGCTGTTGCCCA	STARD9_c.12094G>A_p.V4032M
STARD9_15:42693672_G>A_3	GCACAAAGCTGTTGCCCAG	STARD9_c.12094G>A_p.V4032M
STARD9_15:42693672_G>A_2	CACAAAGCTGTTGCCCAGC	STARD9_c.12094G>A_p.V4032M
STARD4_5:111499899_G>A_6	GCTTTTCGTAAATCACCAT	STARD4_c.605G>A_p.R202Q
STARD4_5:111499899_G>A_5	CTTTTCGTAAATCACCATA	STARD4_c.605G>A_p.R202Q
STARD4_5:111499899_G>A_4	TTTTCGTAAATCACCATAG	STARD4_c.605G>A_p.R202Q
STARD4_5:111499899_G>A_3	TTTCGTAAATCACCATAGA	STARD4_c.605G>A_p.R202Q
STARD4_5:111499899_G>A_2	TTCGTAAATCACCATAGAA	STARD4_c.605G>A_p.R202Q
STARD3_17:39658739_G>A_6	CAGCAACCTGGGCGGCAAG	STARD3_c.565G>A_p.V189I
STARD3_17:39658739_G>A_5	AGCAACCTGGGCGGCAAGA	STARD3_c.565G>A_p.V189I
STARD3_17:39658739_G>A_4	GCAACCTGGGCGGCAAGAT	STARD3_c.565G>A_p.V189I
STARD3_17:39658739_G>A_3	CAACCTGGGCGGCAAGATA	STARD3_c.565G>A_p.V189I
STARD3_17:39658739_G>A_2	AACCTGGGCGGCAAGATAC	STARD3_c.565G>A_p.V189I
ST8SIA6_10:17453589_C>T_6	GGAGCCCGGCGACCGCGGT	ST8SIA6_c.170C>T_p.P57L
ST8SIA6_10:17453589_C>T_5	GAGCCCGGCGACCGCGGTA	ST8SIA6_c.170C>T_p.P57L
ST8SIA6_10:17453589_C>T_4	AGCCCGGCGACCGCGGTAC	ST8SIA6_c.170C>T_p.P57L
ST8SIA6_10:17453589_C>T_3	GCCCGGCGACCGCGGTACC	ST8SIA6_c.170C>T_p.P57L
ST8SIA6_10:17453589_C>T_2	CCCGGCGACCGCGGTACCG	ST8SIA6_c.170C>T_p.P57L
ST6GAL2_2:106843148_G>A_6	AGGCGCCGCCAGCCCAGCG	ST6GAL2_c.830G>A_p.R277Q
ST6GAL2_2:106843148_G>A_5	GGCGCCGCCAGCCCAGCGC	ST6GAL2_c.830G>A_p.R277Q
ST6GAL2_2:106843148_G>A_4	GCGCCGCCAGCCCAGCGCA	ST6GAL2_c.830G>A_p.R277Q
ST6GAL2_2:106843148_G>A_3	CGCCGCCAGCCCAGCGCAG	ST6GAL2_c.830G>A_p.R277Q
ST6GAL2_2:106843148_G>A_2	GCCGCCAGCCCAGCGCAGA	ST6GAL2_c.830G>A_p.R277Q
SSTR4_20:23035958_C>T_6	TACCGGCGGCCCAGCGTGG	SSTR4_c.475C>T_p.R159W
SSTR4_20:23035958_C>T_5	ACCGGCGGCCCAGCGTGGC	SSTR4_c.475C>T_p.R159W
SSTR4_20:23035958_C>T_4	CCGGCGGCCCAGCGTGGCC	SSTR4_c.475C>T_p.R159W
SSTR4_20:23035958_C>T_3	CGGCGGCCCAGCGTGGCCA	SSTR4_c.475C>T_p.R159W
SSTR4_20:23035958_C>T_2	GGCGGCCCAGCGTGGCCAA	SSTR4_c.475C>T_p.R159W
SSTR3_22:37206794_G>A_6	TCCTGGCTGCGCACACGGC	SSTR3_c.1010G>A_p.S337N
SSTR3_22:37206794_G>A_5	CCTGGCTGCGCACACGGCG	SSTR3_c.1010G>A_p.S337N
SSTR3_22:37206794_G>A_4	CTGGCTGCGCACACGGCGG	SSTR3_c.1010G>A_p.S337N
SSTR3_22:37206794_G>A_3	TGGCTGCGCACACGGCGGG	SSTR3_c.1010G>A_p.S337N
SSTR3_22:37206794_G>A_2	GGCTGCGCACACGGCGGGA	SSTR3_c.1010G>A_p.S337N
SSTR1_14:38210140_C>T_6	AAGATGCGCATGGTGGCCC	SSTR1_c.751C>T_p.R251C
SSTR1_14:38210140_C>T_5	AGATGCGCATGGTGGCCCT	SSTR1_c.751C>T_p.R251C
SSTR1_14:38210140_C>T_4	GATGCGCATGGTGGCCCTC	SSTR1_c.751C>T_p.R251C
SSTR1_14:38210140_C>T_3	ATGCGCATGGTGGCCCTCA	SSTR1_c.751C>T_p.R251C
SSTR1_14:38210140_C>T_2	TGCGCATGGTGGCCCTCAA	SSTR1_c.751C>T_p.R251C
SSPO_7:149821122_G>A_6	CCGTACCGGAAGCGGCTCT	SSPO_c.12560G>A_p.R4187Q
SSPO_7:149821122_G>A_5	CGTACCGGAAGCGGCTCTG	SSPO_c.12560G>A_p.R4187Q
SSPO_7:149821122_G>A_4	GTACCGGAAGCGGCTCTGC	SSPO_c.12560G>A_p.R4187Q
SSPO_7:149821122_G>A_3	TACCGGAAGCGGCTCTGCT	SSPO_c.12560G>A_p.R4187Q
SSPO_7:149821122_G>A_2	ACCGGAAGCGGCTCTGCTG	SSPO_c.12560G>A_p.R4187Q
SSC5D_19:55493744_G>A_6	GCGCCCCTCCGCAGCCCAG	SSC5D_c.1045G>A_p.G349R
SSC5D_19:55493744_G>A_5	CGCCCCTCCGCAGCCCAGC	SSC5D_c.1045G>A_p.G349R
SSC5D_19:55493744_G>A_4	GCCCCTCCGCAGCCCAGCT	SSC5D_c.1045G>A_p.G349R
SSC5D_19:55493744_G>A_3	CCCCTCCGCAGCCCAGCTC	SSC5D_c.1045G>A_p.G349R
SSC5D_19:55493744_G>A_2	CCCTCCGCAGCCCAGCTCT	SSC5D_c.1045G>A_p.G349R
SRSF9_12:120464051_G>A_6	GCACATCAGCATAACAGAC	SRSF9_c.421G>A_p.D141N
SRSF9_12:120464051_G>A_5	CACATCAGCATAACAGACA	SRSF9_c.421G>A_p.D141N
SRSF9_12:120464051_G>A_4	ACATCAGCATAACAGACAT	SRSF9_c.421G>A_p.D141N
SRSF9_12:120464051_G>A_3	CATCAGCATAACAGACATC	SRSF9_c.421G>A_p.D141N
SRSF9_12:120464051_G>A_2	ATCAGCATAACAGACATCC	SRSF9_c.421G>A_p.D141N
SRRM1_1:24669568_G>A_6	TAGGTTCCGGAGTCCTGGA	SRRM1_c.2185G>A_p.E729K
SRRM1_1:24669568_G>A_5	AGGTTCCGGAGTCCTGGAG	SRRM1_c.2185G>A_p.E729K
SRRM1_1:24669568_G>A_4	GGTTCCGGAGTCCTGGAGA	SRRM1_c.2185G>A_p.E729K
SRRM1_1:24669568_G>A_3	GTTCCGGAGTCCTGGAGAC	SRRM1_c.2185G>A_p.E729K
SRRM1_1:24669568_G>A_2	TTCCGGAGTCCTGGAGACT	SRRM1_c.2185G>A_p.E729K
SRPRA_11:126264228_G>A_6	ACAATGCCATCAATGAGCC	SRPRA_c.1751G>A_p.G584D
SRPRA_11:126264228_G>A_5	CAATGCCATCAATGAGCCG	SRPRA_c.1751G>A_p.G584D
SRPRA_11:126264228_G>A_4	AATGCCATCAATGAGCCGA	SRPRA_c.1751G>A_p.G584D
SRPRA_11:126264228_G>A_3	ATGCCATCAATGAGCCGAG	SRPRA_c.1751G>A_p.G584D
SRPRA_11:126264228_G>A_2	TGCCATCAATGAGCCGAGG	SRPRA_c.1751G>A_p.G584D
SRPK3_X:153783800_C>T_6	CGCAAACGGAAACAGCAGA	SRPK3_c.823C>T_p.R275W
SRPK3_X:153783800_C>T_5	GCAAACGGAAACAGCAGAA	SRPK3_c.823C>T_p.R275W
SRPK3_X:153783800_C>T_4	CAAACGGAAACAGCAGAAG	SRPK3_c.823C>T_p.R275W
SRPK3_X:153783800_C>T_3	AAACGGAAACAGCAGAAGC	SRPK3_c.823C>T_p.R275W
SRPK3_X:153783800_C>T_2	AACGGAAACAGCAGAAGCG	SRPK3_c.823C>T_p.R275W
SRPK1_6:35869590_C>T_6	GTAGGTCAGTCATTCAGTG	SRPK1_c.1303C>T_p.Q435*
SRPK1_6:35869590_C>T_5	TAGGTCAGTCATTCAGTGA	SRPK1_c.1303C>T_p.Q435*
SRPK1_6:35869590_C>T_4	AGGTCAGTCATTCAGTGAA	SRPK1_c.1303C>T_p.Q435*
SRPK1_6:35869590_C>T_3	GGTCAGTCATTCAGTGAAC	SRPK1_c.1303C>T_p.Q435*
SRPK1_6:35869590_C>T_2	GTCAGTCATTCAGTGAACA	SRPK1_c.1303C>T_p.Q435*
SRGAP2_1:206393546_G>A_6	GCTTGACGCTGAAAAGGAA	SRGAP2_c.704G>A_p.R235H
SRGAP2_1:206393546_G>A_5	CTTGACGCTGAAAAGGAAA	SRGAP2_c.704G>A_p.R235H
SRGAP2_1:206393546_G>A_4	TTGACGCTGAAAAGGAAAC	SRGAP2_c.704G>A_p.R235H
SRGAP2_1:206393546_G>A_3	TGACGCTGAAAAGGAAACA	SRGAP2_c.704G>A_p.R235H
SRGAP2_1:206393546_G>A_2	GACGCTGAAAAGGAAACAG	SRGAP2_c.704G>A_p.R235H
SRGAP1_12:64062977_G>A_6	TGTACTCCGCAGACAGATA	SRGAP1_c.862G>A_p.E288K
SRGAP1_12:64062977_G>A_5	GTACTCCGCAGACAGATAT	SRGAP1_c.862G>A_p.E288K
SRGAP1_12:64062977_G>A_4	TACTCCGCAGACAGATATG	SRGAP1_c.862G>A_p.E288K
SRGAP1_12:64062977_G>A_3	ACTCCGCAGACAGATATGT	SRGAP1_c.862G>A_p.E288K
SRGAP1_12:64062977_G>A_2	CTCCGCAGACAGATATGTT	SRGAP1_c.862G>A_p.E288K
SREBF1_17:17818280_G>A_6	GCAGTGCGCAGACTTAGGT	SREBF1_c.1253G>A_p.R418H
SREBF1_17:17818280_G>A_5	CAGTGCGCAGACTTAGGTT	SREBF1_c.1253G>A_p.R418H
SREBF1_17:17818280_G>A_4	AGTGCGCAGACTTAGGTTC	SREBF1_c.1253G>A_p.R418H
SREBF1_17:17818280_G>A_3	GTGCGCAGACTTAGGTTCT	SREBF1_c.1253G>A_p.R418H
SREBF1_17:17818280_G>A_2	TGCGCAGACTTAGGTTCTC	SREBF1_c.1253G>A_p.R418H
SRC_20:37403359_C>T_6	CAGTACCAGCCCGGGGAGA	SRC_c.1591C>T_p.Q531*
SRC_20:37403359_C>T_5	AGTACCAGCCCGGGGAGAA	SRC_c.1591C>T_p.Q531*
SRC_20:37403359_C>T_4	GTACCAGCCCGGGGAGAAC	SRC_c.1591C>T_p.Q531*
SRC_20:37403359_C>T_3	TACCAGCCCGGGGAGAACC	SRC_c.1591C>T_p.Q531*
SRC_20:37403359_C>T_2	ACCAGCCCGGGGAGAACCT	SRC_c.1591C>T_p.Q531*
SPTY2D1_11:18615591_C>T_6	CTGTGTCCAAAAAGGCACC	SPTY2D1_c.683C>T_p.S228F
SPTY2D1_11:18615591_C>T_5	TGTGTCCAAAAAGGCACCC	SPTY2D1_c.683C>T_p.S228F
SPTY2D1_11:18615591_C>T_4	GTGTCCAAAAAGGCACCCT	SPTY2D1_c.683C>T_p.S228F
SPTY2D1_11:18615591_C>T_3	TGTCCAAAAAGGCACCCTC	SPTY2D1_c.683C>T_p.S228F
SPTY2D1_11:18615591_C>T_2	GTCCAAAAAGGCACCCTCT	SPTY2D1_c.683C>T_p.S228F
SPTBN2_11:66699027_C>T_6	GACAACCGGGAGCAGCAGC	SPTBN2_c.3832C>T_p.R1278W
SPTBN2_11:66699027_C>T_5	ACAACCGGGAGCAGCAGCA	SPTBN2_c.3832C>T_p.R1278W
SPTBN2_11:66699027_C>T_4	CAACCGGGAGCAGCAGCAT	SPTBN2_c.3832C>T_p.R1278W
SPTBN2_11:66699027_C>T_3	AACCGGGAGCAGCAGCATT	SPTBN2_c.3832C>T_p.R1278W
SPTBN2_11:66699027_C>T_2	ACCGGGAGCAGCAGCATTT	SPTBN2_c.3832C>T_p.R1278W
SPTB_14:64799856_G>A_6	TCTGCTCGATCCAGGTGAG	SPTB_c.955G>A_p.E319K
SPTB_14:64799856_G>A_5	CTGCTCGATCCAGGTGAGC	SPTB_c.955G>A_p.E319K
SPTB_14:64799856_G>A_4	TGCTCGATCCAGGTGAGCA	SPTB_c.955G>A_p.E319K
SPTB_14:64799856_G>A_3	GCTCGATCCAGGTGAGCAG	SPTB_c.955G>A_p.E319K
SPTB_14:64799856_G>A_2	CTCGATCCAGGTGAGCAGG	SPTB_c.955G>A_p.E319K
SPIRE1_18:12449678_C>T_6	GCCCCTCGGAGTACTGCCC	SPIRE1_c.2231C>T_p.S744L
SPIRE1_18:12449678_C>T_5	CCCCTCGGAGTACTGCCCT	SPIRE1_c.2231C>T_p.S744L
SPIRE1_18:12449678_C>T_4	CCCTCGGAGTACTGCCCTT	SPIRE1_c.2231C>T_p.S744L
SPIRE1_18:12449678_C>T_3	CCTCGGAGTACTGCCCTTC	SPIRE1_c.2231C>T_p.S744L
SPIRE1_18:12449678_C>T_2	CTCGGAGTACTGCCCTTCA	SPIRE1_c.2231C>T_p.S744L
SPIN4_X:63350669_G>A_6	TGCCTTCCTTCCAGCCGTG	SPIN4_c.151G>A_p.E51K
SPIN4_X:63350669_G>A_5	GCCTTCCTTCCAGCCGTGT	SPIN4_c.151G>A_p.E51K
SPIN4_X:63350669_G>A_4	CCTTCCTTCCAGCCGTGTT	SPIN4_c.151G>A_p.E51K
SPIN4_X:63350669_G>A_3	CTTCCTTCCAGCCGTGTTG	SPIN4_c.151G>A_p.E51K
SPIN4_X:63350669_G>A_2	TTCCTTCCAGCCGTGTTGA	SPIN4_c.151G>A_p.E51K
SPICE1_3:113494073_G>A_6	ACAGCTCTTTTGCTGCAGC	SPICE1_c.361G>A_p.E121K
SPICE1_3:113494073_G>A_5	CAGCTCTTTTGCTGCAGCT	SPICE1_c.361G>A_p.E121K
SPICE1_3:113494073_G>A_4	AGCTCTTTTGCTGCAGCTA	SPICE1_c.361G>A_p.E121K
SPICE1_3:113494073_G>A_3	GCTCTTTTGCTGCAGCTAT	SPICE1_c.361G>A_p.E121K
SPICE1_3:113494073_G>A_2	CTCTTTTGCTGCAGCTATT	SPICE1_c.361G>A_p.E121K
SPI1_11:47358915_C>T_6	AGAGCCCCCCACTGGAGGT	SPI1_c.425C>T_p.P142L
SPI1_11:47358915_C>T_5	GAGCCCCCCACTGGAGGTG	SPI1_c.425C>T_p.P142L
SPI1_11:47358915_C>T_4	AGCCCCCCACTGGAGGTGT	SPI1_c.425C>T_p.P142L
SPI1_11:47358915_C>T_3	GCCCCCCACTGGAGGTGTC	SPI1_c.425C>T_p.P142L
SPI1_11:47358915_C>T_2	CCCCCCACTGGAGGTGTCT	SPI1_c.425C>T_p.P142L
SPDL1_5:169593417_G>A_6	GATCTACTTGGTGCTTCAG	SPDL1_c.400G>A_p.V134I
SPDL1_5:169593417_G>A_5	ATCTACTTGGTGCTTCAGC	SPDL1_c.400G>A_p.V134I
SPDL1_5:169593417_G>A_4	TCTACTTGGTGCTTCAGCT	SPDL1_c.400G>A_p.V134I
SPDL1_5:169593417_G>A_3	CTACTTGGTGCTTCAGCTG	SPDL1_c.400G>A_p.V134I
SPDL1_5:169593417_G>A_2	TACTTGGTGCTTCAGCTGC	SPDL1_c.400G>A_p.V134I
SPATA31D1_9:81991420_G>A_6	GTGAGACTTGATTTAGACT	SPATA31D1_c.950G>A_p.S317N
SPATA31D1_9:81991420_G>A_5	TGAGACTTGATTTAGACTG	SPATA31D1_c.950G>A_p.S317N
SPATA31D1_9:81991420_G>A_4	GAGACTTGATTTAGACTGA	SPATA31D1_c.950G>A_p.S317N
SPATA31D1_9:81991420_G>A_3	AGACTTGATTTAGACTGAG	SPATA31D1_c.950G>A_p.S317N
SPATA31D1_9:81991420_G>A_2	GACTTGATTTAGACTGAGT	SPATA31D1_c.950G>A_p.S317N
SPATA12_3:57073945_G>A_6	AAATATCTCTGACAGGTCT	SPATA12_c.251G>A_p.R84K
SPATA12_3:57073945_G>A_5	AATATCTCTGACAGGTCTC	SPATA12_c.251G>A_p.R84K
SPATA12_3:57073945_G>A_4	ATATCTCTGACAGGTCTCA	SPATA12_c.251G>A_p.R84K
SPATA12_3:57073945_G>A_3	TATCTCTGACAGGTCTCAC	SPATA12_c.251G>A_p.R84K
SPATA12_3:57073945_G>A_2	ATCTCTGACAGGTCTCACT	SPATA12_c.251G>A_p.R84K
SP2_17:47927744_G>A_6	ACTGGGCGCACTCGAAGCG	SP2_c.1762G>A_p.A588T
SP2_17:47927744_G>A_5	CTGGGCGCACTCGAAGCGT	SP2_c.1762G>A_p.A588T
SP2_17:47927744_G>A_4	TGGGCGCACTCGAAGCGTT	SP2_c.1762G>A_p.A588T
SP2_17:47927744_G>A_3	GGGCGCACTCGAAGCGTTT	SP2_c.1762G>A_p.A588T
SP2_17:47927744_G>A_2	GGCGCACTCGAAGCGTTTG	SP2_c.1762G>A_p.A588T
SP140_2:230237086_G>A_6	TGCGACCATCCTAAGAAAC	SP140_c.63G>A_p.M21I
SP140_2:230237086_G>A_5	GCGACCATCCTAAGAAACA	SP140_c.63G>A_p.M21I
SP140_2:230237086_G>A_4	CGACCATCCTAAGAAACAA	SP140_c.63G>A_p.M21I
SP140_2:230237086_G>A_3	GACCATCCTAAGAAACAAA	SP140_c.63G>A_p.M21I
SP140_2:230237086_G>A_2	ACCATCCTAAGAAACAAAG	SP140_c.63G>A_p.M21I
SOX17_8:54458320_G>A_6	TTGGCTCGGCCCGCGGCCC	SOX17_c.182G>A_p.R61Q
SOX17_8:54458320_G>A_5	TGGCTCGGCCCGCGGCCCC	SOX17_c.182G>A_p.R61Q
SOX17_8:54458320_G>A_4	GGCTCGGCCCGCGGCCCCG	SOX17_c.182G>A_p.R61Q
SOX17_8:54458320_G>A_3	GCTCGGCCCGCGGCCCCGG	SOX17_c.182G>A_p.R61Q
SOX17_8:54458320_G>A_2	CTCGGCCCGCGGCCCCGGC	SOX17_c.182G>A_p.R61Q
SOWAHC_2:109614784_G>A_6	CGGTCACCTGGATTCGCGG	SOWAHC_c.295G>A_p.V99M
SOWAHC_2:109614784_G>A_5	GGTCACCTGGATTCGCGGC	SOWAHC_c.295G>A_p.V99M
SOWAHC_2:109614784_G>A_4	GTCACCTGGATTCGCGGCG	SOWAHC_c.295G>A_p.V99M
SOWAHC_2:109614784_G>A_3	TCACCTGGATTCGCGGCGG	SOWAHC_c.295G>A_p.V99M
SOWAHC_2:109614784_G>A_2	CACCTGGATTCGCGGCGGG	SOWAHC_c.295G>A_p.V99M
SORCS3_10:105214446_C>T_6	AGGTATCGGCGGATTGTGT	SORCS3_c.2380C>T_p.R794W
SORCS3_10:105214446_C>T_5	GGTATCGGCGGATTGTGTC	SORCS3_c.2380C>T_p.R794W
SORCS3_10:105214446_C>T_4	GTATCGGCGGATTGTGTCC	SORCS3_c.2380C>T_p.R794W
SORCS3_10:105214446_C>T_3	TATCGGCGGATTGTGTCCA	SORCS3_c.2380C>T_p.R794W
SORCS3_10:105214446_C>T_2	ATCGGCGGATTGTGTCCAA	SORCS3_c.2380C>T_p.R794W
SORCS1_10:106577553_G>A_6	GCTACTCTCCTAAGAGAAA	SORCS1_c.3374G>A_p.R1125K
SORCS1_10:106577553_G>A_5	CTACTCTCCTAAGAGAAAA	SORCS1_c.3374G>A_p.R1125K
SORCS1_10:106577553_G>A_4	TACTCTCCTAAGAGAAAAC	SORCS1_c.3374G>A_p.R1125K
SORCS1_10:106577553_G>A_3	ACTCTCCTAAGAGAAAACG	SORCS1_c.3374G>A_p.R1125K
SORCS1_10:106577553_G>A_2	CTCTCCTAAGAGAAAACGT	SORCS1_c.3374G>A_p.R1125K
SOCS3_17:78358614_C>T_6	GTCCCCCCAGAAGAGCCTA	SOCS3_c.482C>T_p.P161L
SOCS3_17:78358614_C>T_5	TCCCCCCAGAAGAGCCTAT	SOCS3_c.482C>T_p.P161L
SOCS3_17:78358614_C>T_4	CCCCCCAGAAGAGCCTATT	SOCS3_c.482C>T_p.P161L
SOCS3_17:78358614_C>T_3	CCCCCAGAAGAGCCTATTA	SOCS3_c.482C>T_p.P161L
SOCS3_17:78358614_C>T_2	CCCCAGAAGAGCCTATTAC	SOCS3_c.482C>T_p.P161L
SOCS2_12:93572971_C>T_6	CGGGGTCGGCGGAGGAGCC	SOCS2_c.74C>T_p.S25L
SOCS2_12:93572971_C>T_5	GGGGTCGGCGGAGGAGCCA	SOCS2_c.74C>T_p.S25L
SOCS2_12:93572971_C>T_4	GGGTCGGCGGAGGAGCCAT	SOCS2_c.74C>T_p.S25L
SOCS2_12:93572971_C>T_3	GGTCGGCGGAGGAGCCATC	SOCS2_c.74C>T_p.S25L
SOCS2_12:93572971_C>T_2	GTCGGCGGAGGAGCCATCC	SOCS2_c.74C>T_p.S25L
SNX30_9:112751056_G>A_6	GCATGTCGCGCAGGGAGTG	SNX30_c.55G>A_p.D19N
SNX30_9:112751056_G>A_5	CATGTCGCGCAGGGAGTGG	SNX30_c.55G>A_p.D19N
SNX30_9:112751056_G>A_4	ATGTCGCGCAGGGAGTGGG	SNX30_c.55G>A_p.D19N
SNX30_9:112751056_G>A_3	TGTCGCGCAGGGAGTGGGG	SNX30_c.55G>A_p.D19N
SNX30_9:112751056_G>A_2	GTCGCGCAGGGAGTGGGGC	SNX30_c.55G>A_p.D19N
SNX3_6:108260909_G>A_6	CAGCCACGGTCTCCGCCAT	SNX3_c.13G>A_p.V5M
SNX3_6:108260909_G>A_5	AGCCACGGTCTCCGCCATT	SNX3_c.13G>A_p.V5M
SNX3_6:108260909_G>A_4	GCCACGGTCTCCGCCATTT	SNX3_c.13G>A_p.V5M
SNX3_6:108260909_G>A_3	CCACGGTCTCCGCCATTTC	SNX3_c.13G>A_p.V5M
SNX3_6:108260909_G>A_2	CACGGTCTCCGCCATTTCG	SNX3_c.13G>A_p.V5M
SNX19_11:130915348_C>T_6	ACTGCCCCACATCCTGCTG	SNX19_c.592C>T_p.P198S
SNX19_11:130915348_C>T_5	CTGCCCCACATCCTGCTGT	SNX19_c.592C>T_p.P198S
SNX19_11:130915348_C>T_4	TGCCCCACATCCTGCTGTG	SNX19_c.592C>T_p.P198S
SNX19_11:130915348_C>T_3	GCCCCACATCCTGCTGTGC	SNX19_c.592C>T_p.P198S
SNX19_11:130915348_C>T_2	CCCCACATCCTGCTGTGCA	SNX19_c.592C>T_p.P198S
SNAPC4_9:136378561_C>T_6	CTGTTCCTGTACCAGCTGT	SNAPC4_c.3266C>T_p.P1089L
SNAPC4_9:136378561_C>T_5	TGTTCCTGTACCAGCTGTG	SNAPC4_c.3266C>T_p.P1089L
SNAPC4_9:136378561_C>T_4	GTTCCTGTACCAGCTGTGG	SNAPC4_c.3266C>T_p.P1089L
SNAPC4_9:136378561_C>T_3	TTCCTGTACCAGCTGTGGT	SNAPC4_c.3266C>T_p.P1089L
SNAPC4_9:136378561_C>T_2	TCCTGTACCAGCTGTGGTG	SNAPC4_c.3266C>T_p.P1089L
SMO_7:129212327_C>T_6	AGGATCCATTTCTGCCCAG	SMO_c.2240C>T_p.P747L
SMO_7:129212327_C>T_5	GGATCCATTTCTGCCCAGT	SMO_c.2240C>T_p.P747L
SMO_7:129212327_C>T_4	GATCCATTTCTGCCCAGTG	SMO_c.2240C>T_p.P747L
SMO_7:129212327_C>T_3	ATCCATTTCTGCCCAGTGC	SMO_c.2240C>T_p.P747L
SMO_7:129212327_C>T_2	TCCATTTCTGCCCAGTGCA	SMO_c.2240C>T_p.P747L
SMG8_17:59213336_G>A_6	TCTCGCCGTCTTCCTCTTC	SMG8_c.2513G>A_p.R838Q
SMG8_17:59213336_G>A_5	CTCGCCGTCTTCCTCTTCC	SMG8_c.2513G>A_p.R838Q
SMG8_17:59213336_G>A_4	TCGCCGTCTTCCTCTTCCC	SMG8_c.2513G>A_p.R838Q
SMG8_17:59213336_G>A_3	CGCCGTCTTCCTCTTCCCA	SMG8_c.2513G>A_p.R838Q
SMG8_17:59213336_G>A_2	GCCGTCTTCCTCTTCCCAT	SMG8_c.2513G>A_p.R838Q
SMC4_3:160400915_C>T_6	GCGACGCGGAGCCTGAGCC	SMC4_c.89C>T_p.A30V
SMC4_3:160400915_C>T_5	CGACGCGGAGCCTGAGCCG	SMC4_c.89C>T_p.A30V
SMC4_3:160400915_C>T_4	GACGCGGAGCCTGAGCCGC	SMC4_c.89C>T_p.A30V
SMC4_3:160400915_C>T_3	ACGCGGAGCCTGAGCCGCC	SMC4_c.89C>T_p.A30V
SMC4_3:160400915_C>T_2	CGCGGAGCCTGAGCCGCCG	SMC4_c.89C>T_p.A30V
SMARCC1_3:47590793_C>T_6	CACATGCCAGGCCGCATGA	SMARCC1_c.3088C>T_p.P1030S
SMARCC1_3:47590793_C>T_5	ACATGCCAGGCCGCATGAT	SMARCC1_c.3088C>T_p.P1030S
SMARCC1_3:47590793_C>T_4	CATGCCAGGCCGCATGATT	SMARCC1_c.3088C>T_p.P1030S
SMARCC1_3:47590793_C>T_3	ATGCCAGGCCGCATGATTC	SMARCC1_c.3088C>T_p.P1030S
SMARCC1_3:47590793_C>T_2	TGCCAGGCCGCATGATTCC	SMARCC1_c.3088C>T_p.P1030S
SMARCA4_19:10984347_C>T_6	TACCCTCAGGACAACATGC	SMARCA4_c.196C>T_p.Q66*
SMARCA4_19:10984347_C>T_5	ACCCTCAGGACAACATGCA	SMARCA4_c.196C>T_p.Q66*
SMARCA4_19:10984347_C>T_4	CCCTCAGGACAACATGCAC	SMARCA4_c.196C>T_p.Q66*
SMARCA4_19:10984347_C>T_3	CCTCAGGACAACATGCACC	SMARCA4_c.196C>T_p.Q66*
SMARCA4_19:10984347_C>T_2	CTCAGGACAACATGCACCA	SMARCA4_c.196C>T_p.Q66*
SMAD4_18:51078337_G>A_6	TCCGGTCCCCAGCCTTTCA	SMAD4_c.1529G>A_p.G510E
SMAD4_18:51078337_G>A_5	CCGGTCCCCAGCCTTTCAC	SMAD4_c.1529G>A_p.G510E
SMAD4_18:51078337_G>A_4	CGGTCCCCAGCCTTTCACA	SMAD4_c.1529G>A_p.G510E
SMAD4_18:51078337_G>A_3	GGTCCCCAGCCTTTCACAA	SMAD4_c.1529G>A_p.G510E
SMAD4_18:51078337_G>A_2	GTCCCCAGCCTTTCACAAA	SMAD4_c.1529G>A_p.G510E
SMAD4_18:51065549_G>A_6	CAAAAGCGATCTCCTCCAG	SMAD4_c.1082G>A_p.R361H
SMAD4_18:51065549_G>A_5	AAAAGCGATCTCCTCCAGA	SMAD4_c.1082G>A_p.R361H
SMAD4_18:51065549_G>A_4	AAAGCGATCTCCTCCAGAA	SMAD4_c.1082G>A_p.R361H
SMAD4_18:51065549_G>A_3	AAGCGATCTCCTCCAGAAG	SMAD4_c.1082G>A_p.R361H
SMAD4_18:51065549_G>A_2	AGCGATCTCCTCCAGAAGG	SMAD4_c.1082G>A_p.R361H
SMAD4_18:51065548_C>T_6	GGAGATCGCTTTTGTTTGG	SMAD4_c.1081C>T_p.R361C
SMAD4_18:51065548_C>T_5	GAGATCGCTTTTGTTTGGG	SMAD4_c.1081C>T_p.R361C
SMAD4_18:51065548_C>T_4	AGATCGCTTTTGTTTGGGT	SMAD4_c.1081C>T_p.R361C
SMAD4_18:51065548_C>T_3	GATCGCTTTTGTTTGGGTC	SMAD4_c.1081C>T_p.R361C
SMAD4_18:51065548_C>T_2	ATCGCTTTTGTTTGGGTCA	SMAD4_c.1081C>T_p.R361C
SLCO1B7_12:21019271_G>A_6	AACTTACAAATACAATCAC	SLCO1B7_c.109G>A_p.V37I
SLCO1B7_12:21019271_G>A_5	ACTTACAAATACAATCACA	SLCO1B7_c.109G>A_p.V37I
SLCO1B7_12:21019271_G>A_4	CTTACAAATACAATCACAA	SLCO1B7_c.109G>A_p.V37I
SLCO1B7_12:21019271_G>A_3	TTACAAATACAATCACAAA	SLCO1B7_c.109G>A_p.V37I
SLCO1B7_12:21019271_G>A_2	TACAAATACAATCACAAAC	SLCO1B7_c.109G>A_p.V37I
SLCO1B1_12:21141617_C>T_6	GCACAACCTTCAGAGAATA	SLCO1B1_c.43C>T_p.P15S
SLCO1B1_12:21141617_C>T_5	CACAACCTTCAGAGAATAA	SLCO1B1_c.43C>T_p.P15S
SLCO1B1_12:21141617_C>T_4	ACAACCTTCAGAGAATAAG	SLCO1B1_c.43C>T_p.P15S
SLCO1B1_12:21141617_C>T_3	CAACCTTCAGAGAATAAGA	SLCO1B1_c.43C>T_p.P15S
SLCO1B1_12:21141617_C>T_2	AACCTTCAGAGAATAAGAA	SLCO1B1_c.43C>T_p.P15S
SLC8A1_2:40430082_C>T_6	GAACCCCAAGACCCTTCTT	SLC8A1_c.199C>T_p.Q67*
SLC8A1_2:40430082_C>T_5	AACCCCAAGACCCTTCTTT	SLC8A1_c.199C>T_p.Q67*
SLC8A1_2:40430082_C>T_4	ACCCCAAGACCCTTCTTTT	SLC8A1_c.199C>T_p.Q67*
SLC8A1_2:40430082_C>T_3	CCCCAAGACCCTTCTTTTG	SLC8A1_c.199C>T_p.Q67*
SLC8A1_2:40430082_C>T_2	CCCAAGACCCTTCTTTTGG	SLC8A1_c.199C>T_p.Q67*
SLC7A6OS_16:68302477_G>A_6	AAATGTCCTCTGGTTCTTG	SLC7A6OS_c.703G>A_p.D235N
SLC7A6OS_16:68302477_G>A_5	AATGTCCTCTGGTTCTTGA	SLC7A6OS_c.703G>A_p.D235N
SLC7A6OS_16:68302477_G>A_4	ATGTCCTCTGGTTCTTGAT	SLC7A6OS_c.703G>A_p.D235N
SLC7A6OS_16:68302477_G>A_3	TGTCCTCTGGTTCTTGATC	SLC7A6OS_c.703G>A_p.D235N
SLC7A6OS_16:68302477_G>A_2	GTCCTCTGGTTCTTGATCA	SLC7A6OS_c.703G>A_p.D235N
SLC6A3_5:1432582_C>T_6	TGGATCCACTGCAACAACT	SLC6A3_c.535C>T_p.H179Y
SLC6A3_5:1432582_C>T_5	GGATCCACTGCAACAACTC	SLC6A3_c.535C>T_p.H179Y
SLC6A3_5:1432582_C>T_4	GATCCACTGCAACAACTCC	SLC6A3_c.535C>T_p.H179Y
SLC6A3_5:1432582_C>T_3	ATCCACTGCAACAACTCCT	SLC6A3_c.535C>T_p.H179Y
SLC6A3_5:1432582_C>T_2	TCCACTGCAACAACTCCTG	SLC6A3_c.535C>T_p.H179Y
SLC6A20_3:45775784_C>T_6	ATCCTGCGTGGCACCGAGT	SLC6A20_c.559C>T_p.R187C
SLC6A20_3:45775784_C>T_5	TCCTGCGTGGCACCGAGTC	SLC6A20_c.559C>T_p.R187C
SLC6A20_3:45775784_C>T_4	CCTGCGTGGCACCGAGTCC	SLC6A20_c.559C>T_p.R187C
SLC6A20_3:45775784_C>T_3	CTGCGTGGCACCGAGTCCA	SLC6A20_c.559C>T_p.R187C
SLC6A20_3:45775784_C>T_2	TGCGTGGCACCGAGTCCAC	SLC6A20_c.559C>T_p.R187C
SLC5A2_16:31490147_G>A_6	TCCTCCCGTTCCTCCTTGC	SLC5A2_c.1709G>A_p.R570Q
SLC5A2_16:31490147_G>A_5	CCTCCCGTTCCTCCTTGCT	SLC5A2_c.1709G>A_p.R570Q
SLC5A2_16:31490147_G>A_4	CTCCCGTTCCTCCTTGCTA	SLC5A2_c.1709G>A_p.R570Q
SLC5A2_16:31490147_G>A_3	TCCCGTTCCTCCTTGCTAT	SLC5A2_c.1709G>A_p.R570Q
SLC5A2_16:31490147_G>A_2	CCCGTTCCTCCTTGCTATG	SLC5A2_c.1709G>A_p.R570Q
SLC46A3_13:28712712_C>T_6	TGACCGCGTTTGCCAGTAC	SLC46A3_c.1028C>T_p.A343V
SLC46A3_13:28712712_C>T_5	GACCGCGTTTGCCAGTACA	SLC46A3_c.1028C>T_p.A343V
SLC46A3_13:28712712_C>T_4	ACCGCGTTTGCCAGTACAA	SLC46A3_c.1028C>T_p.A343V
SLC46A3_13:28712712_C>T_3	CCGCGTTTGCCAGTACAAC	SLC46A3_c.1028C>T_p.A343V
SLC46A3_13:28712712_C>T_2	CGCGTTTGCCAGTACAACA	SLC46A3_c.1028C>T_p.A343V
SLC45A1_1:8330706_C>T_6	AGCTTCCCCCGGGCCCCCG	SLC45A1_c.1315C>T_p.P439S
SLC45A1_1:8330706_C>T_5	GCTTCCCCCGGGCCCCCGA	SLC45A1_c.1315C>T_p.P439S
SLC45A1_1:8330706_C>T_4	CTTCCCCCGGGCCCCCGAC	SLC45A1_c.1315C>T_p.P439S
SLC45A1_1:8330706_C>T_3	TTCCCCCGGGCCCCCGACG	SLC45A1_c.1315C>T_p.P439S
SLC45A1_1:8330706_C>T_2	TCCCCCGGGCCCCCGACGG	SLC45A1_c.1315C>T_p.P439S
SLC44A1_9:105335687_G>A_6	TCTCTGCAAACTTCTGAAC	SLC44A1_c.394G>A_p.A132T
SLC44A1_9:105335687_G>A_5	CTCTGCAAACTTCTGAACA	SLC44A1_c.394G>A_p.A132T
SLC44A1_9:105335687_G>A_4	TCTGCAAACTTCTGAACAT	SLC44A1_c.394G>A_p.A132T
SLC44A1_9:105335687_G>A_3	CTGCAAACTTCTGAACATC	SLC44A1_c.394G>A_p.A132T
SLC44A1_9:105335687_G>A_2	TGCAAACTTCTGAACATCA	SLC44A1_c.394G>A_p.A132T
SLC38A10_17:81245989_G>A_6	TCCAGCCGGTGGCCCTGCT	SLC38A10_c.2927G>A_p.R976Q
SLC38A10_17:81245989_G>A_5	CCAGCCGGTGGCCCTGCTG	SLC38A10_c.2927G>A_p.R976Q
SLC38A10_17:81245989_G>A_4	CAGCCGGTGGCCCTGCTGT	SLC38A10_c.2927G>A_p.R976Q
SLC38A10_17:81245989_G>A_3	AGCCGGTGGCCCTGCTGTC	SLC38A10_c.2927G>A_p.R976Q
SLC38A10_17:81245989_G>A_2	GCCGGTGGCCCTGCTGTCC	SLC38A10_c.2927G>A_p.R976Q
SLC37A3_7:140380367_G>A_6	GTTTTTCGTGAAGCATGGA	SLC37A3_c.113G>A_p.R38Q
SLC37A3_7:140380367_G>A_5	TTTTTCGTGAAGCATGGAG	SLC37A3_c.113G>A_p.R38Q
SLC37A3_7:140380367_G>A_4	TTTTCGTGAAGCATGGAGC	SLC37A3_c.113G>A_p.R38Q
SLC37A3_7:140380367_G>A_3	TTTCGTGAAGCATGGAGCA	SLC37A3_c.113G>A_p.R38Q
SLC37A3_7:140380367_G>A_2	TTCGTGAAGCATGGAGCAA	SLC37A3_c.113G>A_p.R38Q
SLC35D3_6:136922522_C>T_6	AAGTTCCTCATCAGCCGCT	SLC35D3_c.94C>T_p.L32F
SLC35D3_6:136922522_C>T_5	AGTTCCTCATCAGCCGCTA	SLC35D3_c.94C>T_p.L32F
SLC35D3_6:136922522_C>T_4	GTTCCTCATCAGCCGCTAC	SLC35D3_c.94C>T_p.L32F
SLC35D3_6:136922522_C>T_3	TTCCTCATCAGCCGCTACC	SLC35D3_c.94C>T_p.L32F
SLC35D3_6:136922522_C>T_2	TCCTCATCAGCCGCTACCA	SLC35D3_c.94C>T_p.L32F
SLC2A7_1:9025017_C>T_6	GCCTTCCAGTACGGCTACA	SLC2A7_c.109C>T_p.Q37*
SLC2A7_1:9025017_C>T_5	CCTTCCAGTACGGCTACAA	SLC2A7_c.109C>T_p.Q37*
SLC2A7_1:9025017_C>T_4	CTTCCAGTACGGCTACAAC	SLC2A7_c.109C>T_p.Q37*
SLC2A7_1:9025017_C>T_3	TTCCAGTACGGCTACAACC	SLC2A7_c.109C>T_p.Q37*
SLC2A7_1:9025017_C>T_2	TCCAGTACGGCTACAACCT	SLC2A7_c.109C>T_p.Q37*
SLC27A1_19:17500281_G>A_6	AGGAGCCGACCTGGAATGG	SLC27A1_c.1210G>A_p.G404S
SLC27A1_19:17500281_G>A_5	GGAGCCGACCTGGAATGGG	SLC27A1_c.1210G>A_p.G404S
SLC27A1_19:17500281_G>A_4	GAGCCGACCTGGAATGGGG	SLC27A1_c.1210G>A_p.G404S
SLC27A1_19:17500281_G>A_3	AGCCGACCTGGAATGGGGT	SLC27A1_c.1210G>A_p.G404S
SLC27A1_19:17500281_G>A_2	GCCGACCTGGAATGGGGTG	SLC27A1_c.1210G>A_p.G404S
SLC26A11_17:80222847_G>A_6	CCTCACCCAAACGCAGGAC	SLC26A11_c.427G>A_p.G143R
SLC26A11_17:80222847_G>A_5	CTCACCCAAACGCAGGACC	SLC26A11_c.427G>A_p.G143R
SLC26A11_17:80222847_G>A_4	TCACCCAAACGCAGGACCC	SLC26A11_c.427G>A_p.G143R
SLC26A11_17:80222847_G>A_3	CACCCAAACGCAGGACCCC	SLC26A11_c.427G>A_p.G143R
SLC26A11_17:80222847_G>A_2	ACCCAAACGCAGGACCCCC	SLC26A11_c.427G>A_p.G143R
SLC25A42_19:19110583_C>T_6	GGCCGCCGGCAGCCCTACC	SLC25A42_c.664C>T_p.R222W
SLC25A42_19:19110583_C>T_5	GCCGCCGGCAGCCCTACCC	SLC25A42_c.664C>T_p.R222W
SLC25A42_19:19110583_C>T_4	CCGCCGGCAGCCCTACCCC	SLC25A42_c.664C>T_p.R222W
SLC25A42_19:19110583_C>T_3	CGCCGGCAGCCCTACCCCT	SLC25A42_c.664C>T_p.R222W
SLC25A42_19:19110583_C>T_2	GCCGGCAGCCCTACCCCTT	SLC25A42_c.664C>T_p.R222W
SLC25A25_9:128098570_C>T_6	AACATGCTCTGTCTGTGCC	SLC25A25_c.4C>T_p.L2F
SLC25A25_9:128098570_C>T_5	ACATGCTCTGTCTGTGCCT	SLC25A25_c.4C>T_p.L2F
SLC25A25_9:128098570_C>T_4	CATGCTCTGTCTGTGCCTG	SLC25A25_c.4C>T_p.L2F
SLC25A25_9:128098570_C>T_3	ATGCTCTGTCTGTGCCTGT	SLC25A25_c.4C>T_p.L2F
SLC25A25_9:128098570_C>T_2	TGCTCTGTCTGTGCCTGTA	SLC25A25_c.4C>T_p.L2F
SLC22A5_5:132388990_C>T_6	AATATCCGGATGGTCACCA	SLC22A5_c.1093C>T_p.R365W
SLC22A5_5:132388990_C>T_5	ATATCCGGATGGTCACCAT	SLC22A5_c.1093C>T_p.R365W
SLC22A5_5:132388990_C>T_4	TATCCGGATGGTCACCATC	SLC22A5_c.1093C>T_p.R365W
SLC22A5_5:132388990_C>T_3	ATCCGGATGGTCACCATCA	SLC22A5_c.1093C>T_p.R365W
SLC22A5_5:132388990_C>T_2	TCCGGATGGTCACCATCAT	SLC22A5_c.1093C>T_p.R365W
SLC1A3_5:36686259_C>T_6	GTGAAACCAAGATGTAGAC	SLC1A3_c.1619C>T_p.T540I
SLC1A3_5:36686259_C>T_5	TGAAACCAAGATGTAGACT	SLC1A3_c.1619C>T_p.T540I
SLC1A3_5:36686259_C>T_4	GAAACCAAGATGTAGACTA	SLC1A3_c.1619C>T_p.T540I
SLC1A3_5:36686259_C>T_3	AAACCAAGATGTAGACTAA	SLC1A3_c.1619C>T_p.T540I
SLC1A3_5:36686259_C>T_2	AACCAAGATGTAGACTAAC	SLC1A3_c.1619C>T_p.T540I
SLC18A3_10:49611428_C>T_6	GCCCCGCCCTTCGGGGGCA	SLC18A3_c.688C>T_p.P230S
SLC18A3_10:49611428_C>T_5	CCCCGCCCTTCGGGGGCAT	SLC18A3_c.688C>T_p.P230S
SLC18A3_10:49611428_C>T_4	CCCGCCCTTCGGGGGCATC	SLC18A3_c.688C>T_p.P230S
SLC18A3_10:49611428_C>T_3	CCGCCCTTCGGGGGCATCC	SLC18A3_c.688C>T_p.P230S
SLC18A3_10:49611428_C>T_2	CGCCCTTCGGGGGCATCCT	SLC18A3_c.688C>T_p.P230S
SLC17A9_20:62966557_C>T_6	TGGCCCCGTCCTGCGCCGG	SLC17A9_c.1094C>T_p.P365L
SLC17A9_20:62966557_C>T_5	GGCCCCGTCCTGCGCCGGC	SLC17A9_c.1094C>T_p.P365L
SLC17A9_20:62966557_C>T_4	GCCCCGTCCTGCGCCGGCT	SLC17A9_c.1094C>T_p.P365L
SLC17A9_20:62966557_C>T_3	CCCCGTCCTGCGCCGGCTT	SLC17A9_c.1094C>T_p.P365L
SLC17A9_20:62966557_C>T_2	CCCGTCCTGCGCCGGCTTT	SLC17A9_c.1094C>T_p.P365L
SLC12A9_7:100858867_G>A_6	TCATCACGGCTCCCGTGGT	SLC12A9_c.790G>A_p.V264M
SLC12A9_7:100858867_G>A_5	CATCACGGCTCCCGTGGTG	SLC12A9_c.790G>A_p.V264M
SLC12A9_7:100858867_G>A_4	ATCACGGCTCCCGTGGTGT	SLC12A9_c.790G>A_p.V264M
SLC12A9_7:100858867_G>A_3	TCACGGCTCCCGTGGTGTA	SLC12A9_c.790G>A_p.V264M
SLC12A9_7:100858867_G>A_2	CACGGCTCCCGTGGTGTAG	SLC12A9_c.790G>A_p.V264M
SLAMF6_1:160489138_G>A_6	GAGACACTGAAACATACTC	SLAMF6_c.829G>A_p.V277M
SLAMF6_1:160489138_G>A_5	AGACACTGAAACATACTCT	SLAMF6_c.829G>A_p.V277M
SLAMF6_1:160489138_G>A_4	GACACTGAAACATACTCTA	SLAMF6_c.829G>A_p.V277M
SLAMF6_1:160489138_G>A_3	ACACTGAAACATACTCTAG	SLAMF6_c.829G>A_p.V277M
SLAMF6_1:160489138_G>A_2	CACTGAAACATACTCTAGG	SLAMF6_c.829G>A_p.V277M
SKOR2_18:47247683_G>A_6	GGCTTTCGCCTAGCGCGCA	SKOR2_c.1501G>A_p.E501K
SKOR2_18:47247683_G>A_5	GCTTTCGCCTAGCGCGCAG	SKOR2_c.1501G>A_p.E501K
SKOR2_18:47247683_G>A_4	CTTTCGCCTAGCGCGCAGC	SKOR2_c.1501G>A_p.E501K
SKOR2_18:47247683_G>A_3	TTTCGCCTAGCGCGCAGCC	SKOR2_c.1501G>A_p.E501K
SKOR2_18:47247683_G>A_2	TTCGCCTAGCGCGCAGCCT	SKOR2_c.1501G>A_p.E501K
SKI_1:2303357_G>A_6	CTTTCTCACTCGCTGACAC	SKI_c.1168G>A_p.E390K
SKI_1:2303357_G>A_5	TTTCTCACTCGCTGACACT	SKI_c.1168G>A_p.E390K
SKI_1:2303357_G>A_4	TTCTCACTCGCTGACACTG	SKI_c.1168G>A_p.E390K
SKI_1:2303357_G>A_3	TCTCACTCGCTGACACTGC	SKI_c.1168G>A_p.E390K
SKI_1:2303357_G>A_2	CTCACTCGCTGACACTGCG	SKI_c.1168G>A_p.E390K
SIRT7_17:81914485_G>A_6	TCACATCGAACACCCGCAC	SIRT7_c.625G>A_p.D209N
SIRT7_17:81914485_G>A_5	CACATCGAACACCCGCACG	SIRT7_c.625G>A_p.D209N
SIRT7_17:81914485_G>A_4	ACATCGAACACCCGCACGT	SIRT7_c.625G>A_p.D209N
SIRT7_17:81914485_G>A_3	CATCGAACACCCGCACGTA	SIRT7_c.625G>A_p.D209N
SIRT7_17:81914485_G>A_2	ATCGAACACCCGCACGTAC	SIRT7_c.625G>A_p.D209N
SIRPG_20:1635565_G>A_6	CACCCTCATGGGCTGTTGA	SIRPG_c.783G>A_p.M261I
SIRPG_20:1635565_G>A_5	ACCCTCATGGGCTGTTGAG	SIRPG_c.783G>A_p.M261I
SIRPG_20:1635565_G>A_4	CCCTCATGGGCTGTTGAGT	SIRPG_c.783G>A_p.M261I
SIRPG_20:1635565_G>A_3	CCTCATGGGCTGTTGAGTA	SIRPG_c.783G>A_p.M261I
SIRPG_20:1635565_G>A_2	CTCATGGGCTGTTGAGTAA	SIRPG_c.783G>A_p.M261I
SIRPA_20:1915344_G>A_6	TGTTACCGATGCGGATGGA	SIRPA_c.325G>A_p.G109S
SIRPA_20:1915344_G>A_5	GTTACCGATGCGGATGGAA	SIRPA_c.325G>A_p.G109S
SIRPA_20:1915344_G>A_4	TTACCGATGCGGATGGAAA	SIRPA_c.325G>A_p.G109S
SIRPA_20:1915344_G>A_3	TACCGATGCGGATGGAAAA	SIRPA_c.325G>A_p.G109S
SIRPA_20:1915344_G>A_2	ACCGATGCGGATGGAAAAG	SIRPA_c.325G>A_p.G109S
SIPA1L3_19:38082662_G>A_6	GTGTTCCGCCGCTGCGACA	SIPA1L3_c.1097G>A_p.R366Q
SIPA1L3_19:38082662_G>A_5	TGTTCCGCCGCTGCGACAC	SIPA1L3_c.1097G>A_p.R366Q
SIPA1L3_19:38082662_G>A_4	GTTCCGCCGCTGCGACACC	SIPA1L3_c.1097G>A_p.R366Q
SIPA1L3_19:38082662_G>A_3	TTCCGCCGCTGCGACACCG	SIPA1L3_c.1097G>A_p.R366Q
SIPA1L3_19:38082662_G>A_2	TCCGCCGCTGCGACACCGA	SIPA1L3_c.1097G>A_p.R366Q
SIN3B_19:16876079_G>A_6	GGCAGACGTCATCGCTCAC	SIN3B_c.2713G>A_p.V905I
SIN3B_19:16876079_G>A_5	GCAGACGTCATCGCTCACG	SIN3B_c.2713G>A_p.V905I
SIN3B_19:16876079_G>A_4	CAGACGTCATCGCTCACGA	SIN3B_c.2713G>A_p.V905I
SIN3B_19:16876079_G>A_3	AGACGTCATCGCTCACGAG	SIN3B_c.2713G>A_p.V905I
SIN3B_19:16876079_G>A_2	GACGTCATCGCTCACGAGG	SIN3B_c.2713G>A_p.V905I
SIMC1_5:176290624_C>T_6	ACTTACCAGGAGACAGGCC	SIMC1_c.1100C>T_p.P367L
SIMC1_5:176290624_C>T_5	CTTACCAGGAGACAGGCCT	SIMC1_c.1100C>T_p.P367L
SIMC1_5:176290624_C>T_4	TTACCAGGAGACAGGCCTG	SIMC1_c.1100C>T_p.P367L
SIMC1_5:176290624_C>T_3	TACCAGGAGACAGGCCTGA	SIMC1_c.1100C>T_p.P367L
SIMC1_5:176290624_C>T_2	ACCAGGAGACAGGCCTGAC	SIMC1_c.1100C>T_p.P367L
SIMC1_5:176289679_C>T_6	GAGAGACCAGACCAAGGAC	SIMC1_c.155C>T_p.T52I
SIMC1_5:176289679_C>T_5	AGAGACCAGACCAAGGACA	SIMC1_c.155C>T_p.T52I
SIMC1_5:176289679_C>T_4	GAGACCAGACCAAGGACAA	SIMC1_c.155C>T_p.T52I
SIMC1_5:176289679_C>T_3	AGACCAGACCAAGGACAAA	SIMC1_c.155C>T_p.T52I
SIMC1_5:176289679_C>T_2	GACCAGACCAAGGACAAAA	SIMC1_c.155C>T_p.T52I
SIK3_11:116859524_C>T_6	TCCTCTCCTCCCAACGTGG	SIK3_c.2362C>T_p.P788S
SIK3_11:116859524_C>T_5	CCTCTCCTCCCAACGTGGC	SIK3_c.2362C>T_p.P788S
SIK3_11:116859524_C>T_4	CTCTCCTCCCAACGTGGCA	SIK3_c.2362C>T_p.P788S
SIK3_11:116859524_C>T_3	TCTCCTCCCAACGTGGCAC	SIK3_c.2362C>T_p.P788S
SIK3_11:116859524_C>T_2	CTCCTCCCAACGTGGCACT	SIK3_c.2362C>T_p.P788S
SHROOM4_X:50635349_C>T_6	AGTCGGCGCACCAATGGGG	SHROOM4_c.724C>T_p.R242C
SHROOM4_X:50635349_C>T_5	GTCGGCGCACCAATGGGGG	SHROOM4_c.724C>T_p.R242C
SHROOM4_X:50635349_C>T_4	TCGGCGCACCAATGGGGGC	SHROOM4_c.724C>T_p.R242C
SHROOM4_X:50635349_C>T_3	CGGCGCACCAATGGGGGCC	SHROOM4_c.724C>T_p.R242C
SHROOM4_X:50635349_C>T_2	GGCGCACCAATGGGGGCCA	SHROOM4_c.724C>T_p.R242C
SHROOM2_X:9894957_C>T_6	ACTTTACGGCCCTGGCCCA	SHROOM2_c.1049C>T_p.T350M
SHROOM2_X:9894957_C>T_5	CTTTACGGCCCTGGCCCAG	SHROOM2_c.1049C>T_p.T350M
SHROOM2_X:9894957_C>T_4	TTTACGGCCCTGGCCCAGG	SHROOM2_c.1049C>T_p.T350M
SHROOM2_X:9894957_C>T_3	TTACGGCCCTGGCCCAGGC	SHROOM2_c.1049C>T_p.T350M
SHROOM2_X:9894957_C>T_2	TACGGCCCTGGCCCAGGCT	SHROOM2_c.1049C>T_p.T350M
SHROOM1_5:132823426_G>A_6	GAGCCGCTTGGCGCCTGGC	SHROOM1_c.2050G>A_p.A684T
SHROOM1_5:132823426_G>A_5	AGCCGCTTGGCGCCTGGCC	SHROOM1_c.2050G>A_p.A684T
SHROOM1_5:132823426_G>A_4	GCCGCTTGGCGCCTGGCCC	SHROOM1_c.2050G>A_p.A684T
SHROOM1_5:132823426_G>A_3	CCGCTTGGCGCCTGGCCCA	SHROOM1_c.2050G>A_p.A684T
SHROOM1_5:132823426_G>A_2	CGCTTGGCGCCTGGCCCAC	SHROOM1_c.2050G>A_p.A684T
SHANK1_19:50712020_G>A_6	TCGCAGCATCGGGGGTCAC	SHANK1_c.887G>A_p.C296Y
SHANK1_19:50712020_G>A_5	CGCAGCATCGGGGGTCACC	SHANK1_c.887G>A_p.C296Y
SHANK1_19:50712020_G>A_4	GCAGCATCGGGGGTCACCA	SHANK1_c.887G>A_p.C296Y
SHANK1_19:50712020_G>A_3	CAGCATCGGGGGTCACCAC	SHANK1_c.887G>A_p.C296Y
SHANK1_19:50712020_G>A_2	AGCATCGGGGGTCACCACC	SHANK1_c.887G>A_p.C296Y
SH3GL2_9:17786503_C>T_6	AGAGAGCTTGGAGATGATT	SH3GL2_c.310C>T_p.L104F
SH3GL2_9:17786503_C>T_5	GAGAGCTTGGAGATGATTG	SH3GL2_c.310C>T_p.L104F
SH3GL2_9:17786503_C>T_4	AGAGCTTGGAGATGATTGC	SH3GL2_c.310C>T_p.L104F
SH3GL2_9:17786503_C>T_3	GAGCTTGGAGATGATTGCA	SH3GL2_c.310C>T_p.L104F
SH3GL2_9:17786503_C>T_2	AGCTTGGAGATGATTGCAA	SH3GL2_c.310C>T_p.L104F
SH3D19_4:151165688_C>T_6	CCCTTTCAGCTCCCTGCAA	SH3D19_c.703C>T_p.Q235*
SH3D19_4:151165688_C>T_5	CCTTTCAGCTCCCTGCAAA	SH3D19_c.703C>T_p.Q235*
SH3D19_4:151165688_C>T_4	CTTTCAGCTCCCTGCAAAA	SH3D19_c.703C>T_p.Q235*
SH3D19_4:151165688_C>T_3	TTTCAGCTCCCTGCAAAAA	SH3D19_c.703C>T_p.Q235*
SH3D19_4:151165688_C>T_2	TTCAGCTCCCTGCAAAAAC	SH3D19_c.703C>T_p.Q235*
SH2B3_12:111418456_C>T_6	CGTCCCCGGAGCCAGGCCC	SH2B3_c.311C>T_p.P104L
SH2B3_12:111418456_C>T_5	GTCCCCGGAGCCAGGCCCC	SH2B3_c.311C>T_p.P104L
SH2B3_12:111418456_C>T_4	TCCCCGGAGCCAGGCCCCG	SH2B3_c.311C>T_p.P104L
SH2B3_12:111418456_C>T_3	CCCCGGAGCCAGGCCCCGG	SH2B3_c.311C>T_p.P104L
SH2B3_12:111418456_C>T_2	CCCGGAGCCAGGCCCCGGC	SH2B3_c.311C>T_p.P104L
SGSM3_22:40402191_G>A_6	TACACACGGAAACCAAACT	SGSM3_c.143G>A_p.R48H
SGSM3_22:40402191_G>A_5	ACACACGGAAACCAAACTC	SGSM3_c.143G>A_p.R48H
SGSM3_22:40402191_G>A_4	CACACGGAAACCAAACTCA	SGSM3_c.143G>A_p.R48H
SGSM3_22:40402191_G>A_3	ACACGGAAACCAAACTCAT	SGSM3_c.143G>A_p.R48H
SGSM3_22:40402191_G>A_2	CACGGAAACCAAACTCATC	SGSM3_c.143G>A_p.R48H
SGK1_6:134261977_C>T_6	CTCCCTCAGGAGAACGAGT	SGK1_c.241C>T_p.Q81*
SGK1_6:134261977_C>T_5	TCCCTCAGGAGAACGAGTC	SGK1_c.241C>T_p.Q81*
SGK1_6:134261977_C>T_4	CCCTCAGGAGAACGAGTCA	SGK1_c.241C>T_p.Q81*
SGK1_6:134261977_C>T_3	CCTCAGGAGAACGAGTCAT	SGK1_c.241C>T_p.Q81*
SGK1_6:134261977_C>T_2	CTCAGGAGAACGAGTCATG	SGK1_c.241C>T_p.Q81*
SFTPA1_10:79614030_G>A_6	ACTGCTCTTTTCCCCGACC	SFTPA1_c.709G>A_p.E237K
SFTPA1_10:79614030_G>A_5	CTGCTCTTTTCCCCGACCT	SFTPA1_c.709G>A_p.E237K
SFTPA1_10:79614030_G>A_4	TGCTCTTTTCCCCGACCTG	SFTPA1_c.709G>A_p.E237K
SFTPA1_10:79614030_G>A_3	GCTCTTTTCCCCGACCTGC	SFTPA1_c.709G>A_p.E237K
SFTPA1_10:79614030_G>A_2	CTCTTTTCCCCGACCTGCG	SFTPA1_c.709G>A_p.E237K
SEZ6_17:28957986_G>A_6	TTAGGTCCCACTGGCACAT	SEZ6_c.2263G>A_p.D755N
SEZ6_17:28957986_G>A_5	TAGGTCCCACTGGCACATG	SEZ6_c.2263G>A_p.D755N
SEZ6_17:28957986_G>A_4	AGGTCCCACTGGCACATGA	SEZ6_c.2263G>A_p.D755N
SEZ6_17:28957986_G>A_3	GGTCCCACTGGCACATGAG	SEZ6_c.2263G>A_p.D755N
SEZ6_17:28957986_G>A_2	GTCCCACTGGCACATGAGG	SEZ6_c.2263G>A_p.D755N
SETD2_3:47042657_C>T_6	CGCCCCCCTCTCCTCCCAA	SETD2_c.7142C>T_p.P2381L
SETD2_3:47042657_C>T_5	GCCCCCCTCTCCTCCCAAA	SETD2_c.7142C>T_p.P2381L
SETD2_3:47042657_C>T_4	CCCCCCTCTCCTCCCAAAC	SETD2_c.7142C>T_p.P2381L
SETD2_3:47042657_C>T_3	CCCCCTCTCCTCCCAAACC	SETD2_c.7142C>T_p.P2381L
SETD2_3:47042657_C>T_2	CCCCTCTCCTCCCAAACCA	SETD2_c.7142C>T_p.P2381L
SETBP1_18:44701431_G>A_6	GAGCAGCTGGGGGCTTGGC	SETBP1_c.85G>A_p.A29T
SETBP1_18:44701431_G>A_5	AGCAGCTGGGGGCTTGGCT	SETBP1_c.85G>A_p.A29T
SETBP1_18:44701431_G>A_4	GCAGCTGGGGGCTTGGCTG	SETBP1_c.85G>A_p.A29T
SETBP1_18:44701431_G>A_3	CAGCTGGGGGCTTGGCTGA	SETBP1_c.85G>A_p.A29T
SETBP1_18:44701431_G>A_2	AGCTGGGGGCTTGGCTGAG	SETBP1_c.85G>A_p.A29T
SERPINB2_18:63902910_G>A_6	TTATTTCACTTTCCAGCTG	SERPINB2_c.853G>A_p.E285K
SERPINB2_18:63902910_G>A_5	TATTTCACTTTCCAGCTGC	SERPINB2_c.853G>A_p.E285K
SERPINB2_18:63902910_G>A_4	ATTTCACTTTCCAGCTGCA	SERPINB2_c.853G>A_p.E285K
SERPINB2_18:63902910_G>A_3	TTTCACTTTCCAGCTGCAA	SERPINB2_c.853G>A_p.E285K
SERPINB2_18:63902910_G>A_2	TTCACTTTCCAGCTGCAAA	SERPINB2_c.853G>A_p.E285K
SERPINA6_14:94306105_G>A_6	GTGATGCGTGAGAAATTTG	SERPINA6_c.998G>A_p.R333H
SERPINA6_14:94306105_G>A_5	TGATGCGTGAGAAATTTGC	SERPINA6_c.998G>A_p.R333H
SERPINA6_14:94306105_G>A_4	GATGCGTGAGAAATTTGCC	SERPINA6_c.998G>A_p.R333H
SERPINA6_14:94306105_G>A_3	ATGCGTGAGAAATTTGCCT	SERPINA6_c.998G>A_p.R333H
SERPINA6_14:94306105_G>A_2	TGCGTGAGAAATTTGCCTG	SERPINA6_c.998G>A_p.R333H
SERPINA11_14:94448501_C>T_6	GGGGCCCAAGCTAACACCT	SERPINA11_c.274C>T_p.Q92*
SERPINA11_14:94448501_C>T_5	GGGCCCAAGCTAACACCTC	SERPINA11_c.274C>T_p.Q92*
SERPINA11_14:94448501_C>T_4	GGCCCAAGCTAACACCTCA	SERPINA11_c.274C>T_p.Q92*
SERPINA11_14:94448501_C>T_3	GCCCAAGCTAACACCTCAG	SERPINA11_c.274C>T_p.Q92*
SERPINA11_14:94448501_C>T_2	CCCAAGCTAACACCTCAGC	SERPINA11_c.274C>T_p.Q92*
SERINC4_15:43795440_G>A_6	AGAAGACGAAGTGGAAGGC	SERINC4_c.1291G>A_p.V431I
SERINC4_15:43795440_G>A_5	GAAGACGAAGTGGAAGGCA	SERINC4_c.1291G>A_p.V431I
SERINC4_15:43795440_G>A_4	AAGACGAAGTGGAAGGCAG	SERINC4_c.1291G>A_p.V431I
SERINC4_15:43795440_G>A_3	AGACGAAGTGGAAGGCAGA	SERINC4_c.1291G>A_p.V431I
SERINC4_15:43795440_G>A_2	GACGAAGTGGAAGGCAGAA	SERINC4_c.1291G>A_p.V431I
SEPTIN8_5:132761515_G>A_6	TTGCAGCGCCGGTAGAGCT	SEPTIN8_c.905G>A_p.R302H
SEPTIN8_5:132761515_G>A_5	TGCAGCGCCGGTAGAGCTC	SEPTIN8_c.905G>A_p.R302H
SEPTIN8_5:132761515_G>A_4	GCAGCGCCGGTAGAGCTCG	SEPTIN8_c.905G>A_p.R302H
SEPTIN8_5:132761515_G>A_3	CAGCGCCGGTAGAGCTCGT	SEPTIN8_c.905G>A_p.R302H
SEPTIN8_5:132761515_G>A_2	AGCGCCGGTAGAGCTCGTA	SEPTIN8_c.905G>A_p.R302H
SEPTIN4_17:58522099_G>A_6	GGCTTCCAGCTGGGGCAGG	SEPTIN4_c.710G>A_p.W237*
SEPTIN4_17:58522099_G>A_5	GCTTCCAGCTGGGGCAGGG	SEPTIN4_c.710G>A_p.W237*
SEPTIN4_17:58522099_G>A_4	CTTCCAGCTGGGGCAGGGA	SEPTIN4_c.710G>A_p.W237*
SEPTIN4_17:58522099_G>A_3	TTCCAGCTGGGGCAGGGAC	SEPTIN4_c.710G>A_p.W237*
SEPTIN4_17:58522099_G>A_2	TCCAGCTGGGGCAGGGACA	SEPTIN4_c.710G>A_p.W237*
SENP7_3:101364925_C>T_6	TACAATCTAAGCAAGACCG	SENP7_c.1385C>T_p.S462F
SENP7_3:101364925_C>T_5	ACAATCTAAGCAAGACCGT	SENP7_c.1385C>T_p.S462F
SENP7_3:101364925_C>T_4	CAATCTAAGCAAGACCGTG	SENP7_c.1385C>T_p.S462F
SENP7_3:101364925_C>T_3	AATCTAAGCAAGACCGTGA	SENP7_c.1385C>T_p.S462F
SENP7_3:101364925_C>T_2	ATCTAAGCAAGACCGTGAG	SENP7_c.1385C>T_p.S462F
SEMG2_20:45222072_G>A_6	CTATTCCCCTGATCTTGAG	SEMG2_c.440G>A_p.G147E
SEMG2_20:45222072_G>A_5	TATTCCCCTGATCTTGAGA	SEMG2_c.440G>A_p.G147E
SEMG2_20:45222072_G>A_4	ATTCCCCTGATCTTGAGAA	SEMG2_c.440G>A_p.G147E
SEMG2_20:45222072_G>A_3	TTCCCCTGATCTTGAGAAG	SEMG2_c.440G>A_p.G147E
SEMG2_20:45222072_G>A_2	TCCCCTGATCTTGAGAAGG	SEMG2_c.440G>A_p.G147E
SEMA6A_5:116488909_C>T_6	GTCAAGCACGATTCAAAAT	SEMA6A_c.634C>T_p.H212Y
SEMA6A_5:116488909_C>T_5	TCAAGCACGATTCAAAATG	SEMA6A_c.634C>T_p.H212Y
SEMA6A_5:116488909_C>T_4	CAAGCACGATTCAAAATGG	SEMA6A_c.634C>T_p.H212Y
SEMA6A_5:116488909_C>T_3	AAGCACGATTCAAAATGGT	SEMA6A_c.634C>T_p.H212Y
SEMA6A_5:116488909_C>T_2	AGCACGATTCAAAATGGTT	SEMA6A_c.634C>T_p.H212Y
SEMA5B_3:122926410_G>A_6	AAAACTCCATAGATGAGGT	SEMA5B_c.1280G>A_p.G427E
SEMA5B_3:122926410_G>A_5	AAACTCCATAGATGAGGTC	SEMA5B_c.1280G>A_p.G427E
SEMA5B_3:122926410_G>A_4	AACTCCATAGATGAGGTCC	SEMA5B_c.1280G>A_p.G427E
SEMA5B_3:122926410_G>A_3	ACTCCATAGATGAGGTCCT	SEMA5B_c.1280G>A_p.G427E
SEMA5B_3:122926410_G>A_2	CTCCATAGATGAGGTCCTG	SEMA5B_c.1280G>A_p.G427E
SEMA4G_10:100984723_C>T_6	CAATTGCCACATCCTATCT	SEMA4G_c.1939C>T_p.P647S
SEMA4G_10:100984723_C>T_5	AATTGCCACATCCTATCTG	SEMA4G_c.1939C>T_p.P647S
SEMA4G_10:100984723_C>T_4	ATTGCCACATCCTATCTGG	SEMA4G_c.1939C>T_p.P647S
SEMA4G_10:100984723_C>T_3	TTGCCACATCCTATCTGGT	SEMA4G_c.1939C>T_p.P647S
SEMA4G_10:100984723_C>T_2	TGCCACATCCTATCTGGTC	SEMA4G_c.1939C>T_p.P647S
SEMA3G_3:52439915_C>T_6	GTGGACCGCGTGGAGGCAG	SEMA3G_c.1327C>T_p.R443C
SEMA3G_3:52439915_C>T_5	TGGACCGCGTGGAGGCAGA	SEMA3G_c.1327C>T_p.R443C
SEMA3G_3:52439915_C>T_4	GGACCGCGTGGAGGCAGAG	SEMA3G_c.1327C>T_p.R443C
SEMA3G_3:52439915_C>T_3	GACCGCGTGGAGGCAGAGG	SEMA3G_c.1327C>T_p.R443C
SEMA3G_3:52439915_C>T_2	ACCGCGTGGAGGCAGAGGA	SEMA3G_c.1327C>T_p.R443C
SEMA3C_7:80802760_G>A_6	AGGCTACGCAGTCCACCAG	SEMA3C_c.821G>A_p.R274H
SEMA3C_7:80802760_G>A_5	GGCTACGCAGTCCACCAGT	SEMA3C_c.821G>A_p.R274H
SEMA3C_7:80802760_G>A_4	GCTACGCAGTCCACCAGTG	SEMA3C_c.821G>A_p.R274H
SEMA3C_7:80802760_G>A_3	CTACGCAGTCCACCAGTGT	SEMA3C_c.821G>A_p.R274H
SEMA3C_7:80802760_G>A_2	TACGCAGTCCACCAGTGTC	SEMA3C_c.821G>A_p.R274H
SDR39U1_14:24440827_C>T_6	CTGCAGCCAGGCTTCCTGG	SDR39U1_c.428C>T_p.A143V
SDR39U1_14:24440827_C>T_5	TGCAGCCAGGCTTCCTGGA	SDR39U1_c.428C>T_p.A143V
SDR39U1_14:24440827_C>T_4	GCAGCCAGGCTTCCTGGAG	SDR39U1_c.428C>T_p.A143V
SDR39U1_14:24440827_C>T_3	CAGCCAGGCTTCCTGGAGA	SDR39U1_c.428C>T_p.A143V
SDR39U1_14:24440827_C>T_2	AGCCAGGCTTCCTGGAGAT	SDR39U1_c.428C>T_p.A143V
SDK1_7:4178503_G>A_6	TCATAGCGCCGGTACTTCT	SDK1_c.5015G>A_p.R1672H
SDK1_7:4178503_G>A_5	CATAGCGCCGGTACTTCTT	SDK1_c.5015G>A_p.R1672H
SDK1_7:4178503_G>A_4	ATAGCGCCGGTACTTCTTT	SDK1_c.5015G>A_p.R1672H
SDK1_7:4178503_G>A_3	TAGCGCCGGTACTTCTTTA	SDK1_c.5015G>A_p.R1672H
[truncated: 7,224 more rows]

## Sheet: Group
Sample_ID	Cell	Assay	Library	Tissue	Mouse_ID	Seq_ID
BE_1	MDA-MB-231	in vitro	ABE	Day0	NA	F004044-1-2
BE_2	MDA-MB-231	in vitro	ABE	Day30	NA	F004045-1-1
BE_3	MDA-MB-231	i.v.	ABE	Liver	1	F004039-2-2
BE_4	MDA-MB-231	i.v.	ABE	Liver	2	F004039-2-3
BE_5	MDA-MB-231	i.v.	ABE	Liver	3	F004039-2-4
BE_6	MDA-MB-231	i.v.	ABE	Liver	4	F004039-2-5
BE_7	MDA-MB-231	i.v.	ABE	Liver	5	F004039-2-6
BE_8	MDA-MB-231	i.v.	ABE	Liver	6	F004045-2-1
BE_9	MDA-MB-231	i.v.	ABE	Liver	7	F004045-2-2
BE_10	MDA-MB-231	i.v.	ABE	Liver	8	F004045-2-3
BE_11	MDA-MB-231	i.v.	ABE	Liver	9	F004045-2-4
BE_12	MDA-MB-231	i.v.	ABE	Lung	1	F004039-1-4
BE_13	MDA-MB-231	i.v.	ABE	Lung	2	F004039-1-5
BE_14	MDA-MB-231	i.v.	ABE	Lung	3	F004039-1-6
BE_15	MDA-MB-231	i.v.	ABE	Lung	4	F004039-1-7
BE_16	MDA-MB-231	i.v.	ABE	Lung	5	F004039-2-1
BE_17	MDA-MB-231	i.v.	ABE	Lung	6	F004045-1-3
BE_18	MDA-MB-231	i.v.	ABE	Lung	7	F004045-1-4
BE_19	MDA-MB-231	i.v.	ABE	Lung	8	F004045-1-5
BE_20	MDA-MB-231	i.v.	ABE	Lung	9	F004045-1-6
BE_21	MCF7	in vitro	ABE	Day0	NA	F004044-2-1
BE_22	MCF7	in vitro	ABE	Day30	NA	F004044-2-3
BE_23	MCF7	i.v.	ABE	Liver	10	F004044-2-10
BE_24	MCF7	i.v.	ABE	Liver	11	F004044-2-9
BE_25	MCF7	i.v.	ABE	Liver	12	F004044-3-1
BE_26	MCF7	i.v.	ABE	Liver	13	F004044-3-2
BE_27	MCF7	i.v.	ABE	Liver	14	F004045-5-1
BE_28	MCF7	i.v.	ABE	Liver	15	F004045-5-2
BE_29	MCF7	i.v.	ABE	Liver	16	F004045-5-3
BE_30	MCF7	i.v.	ABE	Liver	17	F004045-5-4
BE_31	MCF7	i.v.	ABE	Lung	10	F004044-2-5
BE_32	MCF7	i.v.	ABE	Lung	11	F004044-2-6
BE_33	MCF7	i.v.	ABE	Lung	12	F004044-2-7
BE_34	MCF7	i.v.	ABE	Lung	13	F004044-2-8
BE_35	MCF7	i.v.	ABE	Lung	14	F004045-4-3
BE_36	MCF7	i.v.	ABE	Lung	15	F004045-4-4
BE_37	MCF7	i.v.	ABE	Lung	16	F004045-4-5
BE_38	MCF7	i.v.	ABE	Lung	17	F004045-4-6
BE_39	MDA-MB-231	in vitro	CBE	Day0	NA	F004044-1-1
BE_40	MDA-MB-231	in vitro	CBE	Day30	NA	F004044-1-3
BE_41	MDA-MB-231	i.v.	CBE	Liver	18	F004039-3-3
BE_42	MDA-MB-231	i.v.	CBE	Liver	19	F004039-3-4
BE_43	MDA-MB-231	i.v.	CBE	Liver	20	F004039-3-5
BE_44	MDA-MB-231	i.v.	CBE	Liver	21	F004039-3-6
BE_45	MDA-MB-231	i.v.	CBE	Liver	22	F004045-3-3
BE_46	MDA-MB-231	i.v.	CBE	Liver	23	F004045-3-4
BE_47	MDA-MB-231	i.v.	CBE	Liver	24	F004045-3-5
BE_48	MDA-MB-231	i.v.	CBE	Liver	25	F004045-3-6
BE_49	MDA-MB-231	i.v.	CBE	Lung	18	F004039-2-7
BE_50	MDA-MB-231	i.v.	CBE	Lung	19	F004039-2-8
BE_51	MDA-MB-231	i.v.	CBE	Lung	20	F004039-3-1
BE_52	MDA-MB-231	i.v.	CBE	Lung	21	F004039-3-2
BE_53	MDA-MB-231	i.v.	CBE	Lung	22	F004045-2-5
BE_54	MDA-MB-231	i.v.	CBE	Lung	23	F004045-2-6
BE_55	MDA-MB-231	i.v.	CBE	Lung	24	F004045-3-1
BE_56	MDA-MB-231	i.v.	CBE	Lung	25	F004045-3-2
BE_57	MCF7	in vitro	CBE	Day0	NA	F004044-2-2
BE_58	MCF7	in vitro	CBE	Day30	NA	F004044-2-4
BE_59	MCF7	i.v.	CBE	Liver	26	F004044-3-10
BE_60	MCF7	i.v.	CBE	Liver	27	F004044-3-7
BE_61	MCF7	i.v.	CBE	Liver	28	F004044-3-8
BE_62	MCF7	i.v.	CBE	Liver	29	F004044-3-9
BE_63	MCF7	i.v.	CBE	Liver	30	F004045-6-3
BE_64	MCF7	i.v.	CBE	Liver	31	F004045-6-4
BE_65	MCF7	i.v.	CBE	Liver	32	F004045-6-5
BE_66	MCF7	i.v.	CBE	Liver	33	F004045-6-6
BE_67	MCF7	i.v.	CBE	Lung	26	F004044-3-3
BE_68	MCF7	i.v.	CBE	Lung	27	F004044-3-4
BE_69	MCF7	i.v.	CBE	Lung	28	F004044-3-5
BE_70	MCF7	i.v.	CBE	Lung	29	F004044-3-6
BE_71	MCF7	i.v.	CBE	Lung	30	F004045-5-5
BE_72	MCF7	i.v.	CBE	Lung	31	F004045-5-6
BE_73	MCF7	i.v.	CBE	Lung	32	F004045-6-1
BE_74	MCF7	i.v.	CBE	Lung	33	F004045-6-2

## Sheet: Count_ABE
SNV	sgRNA	BE_1	BE_2	BE_3	BE_4	BE_5	BE_6	BE_7	BE_8	BE_9	BE_12	BE_13	BE_14	BE_15	BE_16	BE_17	BE_18	BE_19	BE_20	BE_21	BE_22	BE_23	BE_24	BE_25	BE_26	BE_27	BE_28	BE_29	BE_31	BE_32	BE_33	BE_34	BE_35	BE_36	BE_37	BE_38
ZSCAN31_c.10A>G_p.T4A	ZSCAN31_6:28329674_A>G_5	82.2491	76.9116	0	0	0	0	0	0	0	0	0.795638	0	0	0	0.182862	8.49469	32.6897	15.4226	159.357	0	115.46	158.713	154.304	138.225	25.146	0	0	152.422	118.418	136.611	104.742	37.9027	82.8004	3.74567	76.913
ZSCAN31_c.10A>G_p.T4A	ZSCAN31_6:28329674_A>G_2	123.723	127.611	0	0	0	0	0	0	0	21.5855	0.795638	9.40241	0	0	1.64575	10.1936	18.1609	17.6258	256.103	0	216.487	254.981	219.274	149.137	48.0061	0	0	249.418	243.802	227.685	239.805	56.8541	82.8004	5.78876	100.579
ZSCAN31_c.10A>G_p.T4A	ZSCAN31_6:28329674_A>G_4	88.0741	77.4289	0	0	0	0	0	0	0	0	0	0	0	0	0.548585	3.39787	7.26438	4.40646	162.737	0	92.3679	106.676	173.253	83.6623	18.288	0	0	135.101	162.535	150.623	146.088	30.796	52.6912	4.08618	100.579
ZSCAN31_c.10A>G_p.T4A	ZSCAN31_6:28329674_A>G_3	74.0941	79.4983	0	0	0	0	0	0	0	0	1.59128	18.8048	0	0	0.731447	3.39787	10.8966	19.8291	215.968	0	161.644	213.352	232.809	83.6623	50.2921	0	0	221.705	232.193	178.645	179.165	54.4852	82.8004	4.4267	112.411
ZSCAN31_c.10A>G_p.T4A	ZSCAN31_6:28329674_A>G_6	92.7342	127.094	0	0	0	0	0	0	0	10.7928	3.18255	18.8048	0	0	0.731447	11.8926	29.0575	33.0485	159.441	0	181.849	166.518	135.354	120.037	36.5761	0	0	121.245	148.603	164.634	165.383	291.377	150.546	4.4267	106.495
ZRANB1_c.1118A>G_p.Y373C	ZRANB1_10:124972080_A>G_3	76.8901	38.2833	0	0	0	0	0	0	0	0	0	9.40241	0	0	0.365723	0	7.26438	6.60969	62.7795	0	101.027	80.6574	48.7275	87.2998	18.288	0	0	65.8186	92.8771	63.0513	60.6403	40.2716	67.7458	1.70258	65.0802
ZRANB1_c.1118A>G_p.Y373C	ZRANB1_10:124972080_A>G_5	62.6771	27.764	0	0	0	0	0	0	0	0	0.795638	0	2.75047	0	0.365723	0	0	2.20323	70.384	0	86.5949	59.8426	70.3842	116.4	6.85801	0	0	65.8186	58.0482	87.5713	49.6148	16.5824	37.6366	2.04309	23.6655
ZRANB1_c.1118A>G_p.Y373C	ZRANB1_10:124972080_A>G_2	93.6662	62.7709	0	0	0	0	0	0	0	5.39638	0	0	0	0	0.731447	6.79575	7.26438	15.4226	98.0983	0	95.2544	70.25	110.991	83.6623	38.8621	0	0	93.5317	81.2675	80.5656	99.2296	26.0581	37.6366	4.4267	29.5819
ZRANB1_c.1118A>G_p.Y373C	ZRANB1_10:124972080_A>G_4	87.6081	130.543	0	0	0	0	0	0	0	5.39638	0	18.8048	0	0	1.09717	6.79575	14.5288	11.0162	124.123	0	86.5949	91.0648	113.698	127.312	25.146	0	0	155.886	97.521	122.6	118.524	30.796	52.6912	4.4267	53.2475
ZRANB1_c.1118A>G_p.Y373C	ZRANB1_10:124972080_A>G_6	51.0271	2.58671	0	0	0	0	0	0	0	16.1891	0.795638	9.40241	0	0	0.365723	0	0	0	50.4433	0	66.3895	52.037	62.263	54.5624	13.716	0	0	65.8186	71.9798	52.5428	55.1276	18.9514	30.1092	1.02155	59.1639
ZNF850_c.2351T>C_p.L784P	ZNF850_19:36748689_T>C_5	113.471	241.944	0	0	0	0	0	0	0	0	1.59128	9.40241	1.37524	0	1.64575	22.0862	50.8506	26.4388	186.987	0	199.168	200.343	184.082	160.05	18.288	0	0	159.35	136.994	157.628	192.946	35.5338	105.382	3.06464	65.0802
ZNF850_c.2351T>C_p.L784P	ZNF850_19:36748689_T>C_3	66.6381	187.105	0	0	0	0	0	0	0	10.7928	0	9.40241	1.37524	0	1.82862	13.5915	14.5288	35.2517	161.554	0	167.417	148.306	159.718	134.587	45.7201	0	0	162.815	190.398	203.165	179.165	40.2716	105.382	3.40515	82.8294
ZNF850_c.2351T>C_p.L784P	ZNF850_19:36748689_T>C_6	106.248	141.752	0	0	0	0	0	0	0	5.39638	2.38691	18.8048	0	0	0.548585	8.49469	14.5288	35.2517	156.569	0	167.417	187.333	159.718	174.6	29.7181	0	0	169.743	164.857	150.623	151.601	35.5338	112.91	3.74567	82.8294
ZNF850_c.2351T>C_p.L784P	ZNF850_19:36748689_T>C_2	111.374	141.234	0	0	0	0	0	0	0	16.1891	0.795638	0	0	0	0.914308	11.8926	10.8966	15.4226	201.435	0	193.395	239.37	184.082	98.2123	20.574	0	0	169.743	164.857	213.674	195.703	45.0095	82.8004	6.8103	82.8294
ZNF850_c.2351T>C_p.L784P	ZNF850_19:36748689_T>C_4	85.5111	89.6727	211.203	0	0	0	0	0	0	5.39638	0.795638	0	1.37524	0	0.365723	3.39787	0	13.2194	173.89	0	184.736	184.731	170.546	127.312	25.146	0	0	187.063	178.788	210.171	176.408	37.9027	67.7458	4.76721	124.244
ZNF8_c.1154T>C_p.F385S	ZNF8_19:58294962_T>C_2	95.0642	425.773	0	0	0	0	0	0	0	10.7928	0	18.8048	0	0	4.57154	40.7745	69.0116	63.8937	105.787	0	138.552	91.0648	113.698	90.9373	16.002	0	0	86.6035	113.774	122.6	137.819	42.6406	67.7458	3.74567	76.913
ZNF8_c.1154T>C_p.F385S	ZNF8_19:58294962_T>C_3	171.255	150.891	0	0	0	0	0	0	0	16.1891	0.795638	0	2.75047	0	1.82862	13.5915	39.9541	15.4226	213.518	0	184.736	169.12	221.981	149.137	57.1501	0	0	148.958	188.076	224.182	220.51	66.3298	158.074	4.4267	88.7458
ZNF8_c.1154T>C_p.F385S	ZNF8_19:58294962_T>C_5	78.0551	81.5676	0	0	0	0	0	0	0	10.7928	0.795638	0	1.37524	0	0.731447	1.69894	0	13.2194	110.012	0	127.006	122.287	108.283	87.2998	25.146	0	0	107.388	95.1991	98.0798	93.7169	28.427	75.2731	4.08618	59.1639
ZNF8_c.1154T>C_p.F385S	ZNF8_19:58294962_T>C_4	131.878	160.721	0	0	0	0	0	0	0	16.1891	1.59128	0	0	0	0.182862	11.8926	14.5288	17.6258	213.096	0	152.984	205.546	270.709	232.8	50.2921	0	0	180.135	157.891	157.628	154.357	33.1649	75.2731	3.40515	94.6622
ZNF8_c.1154T>C_p.F385S	ZNF8_19:58294962_T>C_6	68.0361	41.2149	0	0	0	0	0	0	0	0	0	0	0	0	0.548585	5.09681	3.63219	13.2194	185.804	0	202.055	184.731	194.91	170.962	43.4341	0	0	187.063	197.364	171.64	176.408	49.7473	120.437	2.72412	76.913
ZNF775_c.758T>C_p.L253P	ZNF775_7:150397239_T>C_5	144.693	214.697	0	0	0	0	0	0	13.3297	0	2.38691	9.40241	4.12571	0	19.2005	18.6883	43.5863	63.8937	202.534	0	239.579	228.963	138.061	192.787	48.0061	0	0	207.848	199.686	206.668	192.946	75.8054	75.2731	6.46979	106.495
ZNF775_c.758T>C_p.L253P	ZNF775_7:150397239_T>C_3	131.878	42.0772	0	0	0	0	0	0	0	5.39638	0.795638	9.40241	2.75047	0	262.406	57.7639	94.4369	66.0969	219.686	0	305.969	202.944	257.173	207.337	34.2901	0	0	252.882	243.802	269.72	206.728	47.3784	173.128	6.46979	147.91
ZNF775_c.758T>C_p.L253P	ZNF775_7:150397239_T>C_4	115.102	135.544	0	0	0	0	0	0	0	5.39638	1.59128	28.2072	0	0	14636.6	2137.26	4155.22	3474.5	235.994	112.485	225.147	215.954	205.738	167.325	41.1481	0	0	211.312	215.939	220.68	250.83	75.8054	120.437	6.46979	76.913
ZNF775_c.758T>C_p.L253P	ZNF775_7:150397239_T>C_2	174.983	238.667	0	0	0	0	33.1059	0	0	21.5855	1.59128	18.8048	2.75047	0	1.28003	13.5915	39.9541	24.2355	220.193	0	274.217	247.176	132.647	261.899	50.2921	0	0	232.097	197.364	234.691	181.921	42.6406	158.074	7.15082	118.328
ZNF775_c.758T>C_p.L253P	ZNF775_7:150397239_T>C_6	207.603	463.539	0	0	0	0	0	0	0	10.7928	0	37.6096	2.75047	0	2.92579	30.5809	69.0116	35.2517	290.915	0	271.331	254.981	265.294	250.987	36.5761	0	0	349.878	250.768	294.239	286.663	78.1744	97.8551	5.10773	94.6622
ZNF714_c.1271T>C_p.L424P	ZNF714_19:21117935_T>C_4	52.6581	55.1832	0	0	0	0	0	0	0	5.39638	0.795638	9.40241	1.37524	0	0.548585	5.09681	14.5288	8.81292	101.647	0	69.276	78.0555	143.476	105.487	9.14402	0	0	62.3545	81.2675	122.6	115.768	26.0581	52.6912	1.70258	35.4983
ZNF714_c.1271T>C_p.L424P	ZNF714_19:21117935_T>C_3	84.5791	200.901	0	0	0	0	0	0	0	0	0.795638	0	1.37524	0	1.46289	11.8926	29.0575	26.4388	85.5931	0	92.3679	78.0555	110.991	98.2123	43.4341	0	0	131.637	99.8429	80.5656	110.255	42.6406	15.0546	5.10773	47.3311
ZNF714_c.1271T>C_p.L424P	ZNF714_19:21117935_T>C_6	56.8521	37.2486	0	0	0	0	0	0	0	10.7928	0.795638	9.40241	0	0	0.365723	10.1936	7.26438	4.40646	94.634	0	132.779	83.2592	59.5559	112.762	20.574	0	0	93.5317	92.8771	119.097	107.499	35.5338	75.2731	3.40515	65.0802
ZNF714_c.1271T>C_p.L424P	ZNF714_19:21117935_T>C_5	78.0551	115.54	0	0	0	0	0	0	0	0	2.38691	9.40241	1.37524	0	1.46289	13.5915	18.1609	13.2194	100.887	0	129.892	148.306	108.283	160.05	29.7181	57.7857	0	152.422	136.994	101.583	157.114	52.1162	82.8004	4.4267	82.8294
ZNF714_c.1271T>C_p.L424P	ZNF714_19:21117935_T>C_2	85.2781	83.4646	0	0	0	0	0	0	0	10.7928	1.59128	9.40241	1.37524	0	0.731447	6.79575	10.8966	11.0162	86.607	0	106.8	96.2685	81.2126	72.7499	6.85801	0	0	76.2111	109.131	66.5542	107.499	28.427	52.6912	1.70258	65.0802
ZNF708_c.1519A>G_p.K507E	ZNF708_19:21293447_A>G_4	106.248	164.342	0	0	0	0	0	0	0	10.7928	1.59128	18.8048	0	0	0.914308	20.3872	10.8966	22.0323	105.365	0	98.1409	111.88	121.819	149.137	18.288	0	0	100.46	120.74	87.5713	110.255	35.5338	52.6912	3.06464	59.1639
ZNF708_c.1519A>G_p.K507E	ZNF708_19:21293447_A>G_6	99.0252	172.965	0	0	0	0	0	0	0	5.39638	1.59128	9.40241	0	0	0.548585	6.79575	18.1609	22.0323	116.856	0	80.8219	96.2685	127.233	127.312	18.288	0	0	96.9959	97.521	98.0798	143.332	47.3784	60.2185	4.08618	41.4147
ZNF708_c.1519A>G_p.K507E	ZNF708_19:21293447_A>G_2	81.7831	141.062	0	0	0	0	0	0	0	5.39638	0.795638	9.40241	1.37524	0	1.46289	6.79575	18.1609	19.8291	97.1689	0	66.3895	111.88	100.162	134.587	25.146	0	0	86.6035	78.9456	63.0513	88.2041	18.9514	45.1639	4.76721	35.4983
ZNF708_c.1519A>G_p.K507E	ZNF708_19:21293447_A>G_3	104.384	232.976	0	0	0	0	0	0	0	16.1891	0.795638	0	0	0	1.82862	11.8926	32.6897	19.8291	121.588	0	95.2544	98.8703	116.405	130.95	32.0041	0	0	124.709	143.96	84.0684	126.793	33.1649	67.7458	3.40515	70.9966
ZNF708_c.1519A>G_p.K507E	ZNF708_19:21293447_A>G_5	88.3071	125.714	0	0	0	0	0	0	0	5.39638	0	0	0	0	1.28003	15.2904	21.7931	15.4226	118.799	0	63.503	111.88	138.061	98.2123	20.574	0	0	114.317	155.569	101.583	104.742	33.1649	67.7458	1.70258	76.913
ZNF708_c.1249A>G_p.K417E	ZNF708_19:21293717_A>G_4	62.9101	105.883	0	0	0	0	0	0	0	5.39638	1.59128	0	0	0	0.914308	6.79575	7.26438	6.60969	62.2726	0	49.0705	80.6574	54.1417	109.125	18.288	0	0	79.6752	62.6921	84.0684	85.4477	42.6406	52.6912	2.72412	70.9966
ZNF708_c.1249A>G_p.K417E	ZNF708_19:21293717_A>G_5	62.6771	374.211	0	0	0	0	0	0	0	0	0.795638	18.8048	0	0	1.64575	27.183	54.4828	41.8614	106.041	0	106.8	122.287	100.162	112.762	18.288	0	0	138.566	116.096	91.0741	124.037	18.9514	75.2731	3.40515	47.3311
ZNF708_c.1249A>G_p.K417E	ZNF708_19:21293717_A>G_3	71.0651	161.066	0	0	0	0	33.1059	0	0	5.39638	0	0	0	0	0.548585	11.8926	21.7931	28.642	91.8457	0	83.7084	106.676	81.2126	167.325	20.574	0	0	69.2828	85.9113	98.0798	77.1786	35.5338	75.2731	3.74567	70.9966
ZNF708_c.1249A>G_p.K417E	ZNF708_19:21293717_A>G_2	58.9491	54.1485	0	0	0	0	0	0	0	5.39638	0.795638	0	0	0	0.182862	8.49469	14.5288	13.2194	72.4119	0	80.8219	75.4537	70.3842	69.1124	18.288	0	0	72.7469	95.1991	70.057	46.8584	28.427	45.1639	3.06464	82.8294
ZNF708_c.1249A>G_p.K417E	ZNF708_19:21293717_A>G_6	83.6471	136.751	0	0	0	0	0	0	0	0	1.59128	0	0	0	2.19434	11.8926	25.4253	24.2355	106.717	0	106.8	91.0648	110.991	145.5	18.288	0	0	83.1393	85.9113	66.5542	88.2041	26.0581	60.2185	2.72412	29.5819
ZNF681_c.1513T>C_p.S505P	ZNF681_19:23744037_T>C_6	80.6181	92.9492	0	0	0	0	0	0	0	0	1.59128	0	0	0	0.365723	11.8926	25.4253	15.4226	109.336	0	115.46	148.306	70.3842	112.762	32.0041	0	0	107.388	132.35	119.097	110.255	23.6892	37.6366	2.38361	65.0802
ZNF681_c.1513T>C_p.S505P	ZNF681_19:23744037_T>C_3	71.9971	31.213	0	0	0	0	0	0	0	5.39638	0.795638	0	0	0	0.365723	1.69894	3.63219	6.60969	97.4223	0	57.73	96.2685	105.576	94.5748	4.57201	0	0	110.852	92.8771	70.057	71.6658	21.3203	15.0546	2.04309	17.7492
ZNF681_c.1513T>C_p.S505P	ZNF681_19:23744037_T>C_2	80.8511	273.847	0	0	0	0	0	0	0	5.39638	0.795638	9.40241	4.12571	0	1.46289	8.49469	36.3219	22.0323	75.5382	0	66.3895	59.8426	59.5559	109.125	16.002	0	0	45.0338	99.8429	35.0285	60.6403	26.0581	52.6912	1.36206	65.0802
ZNF681_c.1513T>C_p.S505P	ZNF681_19:23744037_T>C_4	59.1821	173.655	0	0	0	0	0	0	0	10.7928	0	0	0	0	0.731447	1.69894	14.5288	28.642	76.2142	0	86.5949	33.8241	67.6771	69.1124	13.716	0	0	65.8186	53.4044	63.0513	46.8584	30.796	60.2185	0.68103	29.5819
ZNF681_c.1513T>C_p.S505P	ZNF681_19:23744037_T>C_5	32.8531	79.8432	0	0	0	0	0	0	0	0	0	18.8048	0	0	0.548585	5.09681	3.63219	8.81292	70.553	0	75.0489	106.676	51.4346	61.8374	22.86	0	0	79.6752	81.2675	87.5713	71.6658	106.601	37.6366	4.08618	23.6655
ZNF571_c.461T>C_p.L154P	ZNF571_19:37565967_T>C_4	68.9681	23.108	0	0	0	0	0	0	0	0	0	18.8048	1.37524	0	0.182862	0	10.8966	2.20323	140.346	0	112.573	119.685	121.819	109.125	38.8621	0	0	124.709	92.8771	119.097	135.063	35.5338	67.7458	3.40515	94.6622
ZNF571_c.461T>C_p.L154P	ZNF571_19:37565967_T>C_3	169.624	364.554	0	0	0	0	0	0	0	5.39638	1.59128	18.8048	2.75047	0	1.64575	18.6883	39.9541	24.2355	187.071	0	196.282	215.954	186.789	200.062	45.7201	0	0	176.671	202.008	175.143	203.972	177.669	97.8551	5.78876	76.913
ZNF571_c.461T>C_p.L154P	ZNF571_19:37565967_T>C_2	155.877	366.278	0	0	0	0	0	0	0	32.3783	0	28.2072	4.12571	0	4.57154	25.4841	72.6438	55.0808	201.097	0	152.984	187.333	184.082	236.437	36.5761	0	0	214.777	181.11	136.611	173.652	59.223	60.2185	4.76721	94.6622
ZNF571_c.461T>C_p.L154P	ZNF571_19:37565967_T>C_5	58.9491	170.206	0	0	0	0	0	0	0	0	0	9.40241	0	0	2.3772	20.3872	18.1609	19.8291	138.149	0	124.119	169.12	143.476	90.9373	29.7181	57.7857	0	107.388	171.823	150.623	137.819	68.6987	60.2185	3.40515	47.3311
ZNF571_c.461T>C_p.L154P	ZNF571_19:37565967_T>C_6	70.5991	230.39	0	0	0	0	0	0	0	0	0	9.40241	0	0	3.10865	30.5809	54.4828	41.8614	112.209	0	115.46	161.315	119.112	105.487	32.0041	0	0	131.637	134.672	143.617	140.575	52.1162	120.437	4.4267	70.9966
ZNF516_c.239A>G_p.H80R	ZNF516_18:76442816_A>G_4	149.819	478.886	0	0	0	123.114	0	0	0	10.7928	4.77383	0	2.75047	0	3.10865	27.183	39.9541	57.284	239.458	0	314.628	275.796	181.375	210.975	36.5761	57.7857	0	218.241	285.597	280.228	303.202	90.019	127.964	6.8103	59.1639
ZNF516_c.239A>G_p.H80R	ZNF516_18:76442816_A>G_6	112.539	134.854	0	0	0	0	0	0	0	5.39638	2.38691	0	1.37524	0	1.46289	11.8926	32.6897	13.2194	165.948	0	132.779	132.694	154.304	149.137	25.146	0	0	110.852	153.247	168.137	135.063	26.0581	82.8004	3.06464	88.7458
ZNF516_c.239A>G_p.H80R	ZNF516_18:76442816_A>G_2	200.846	449.57	0	0	0	0	0	0	0	21.5855	1.59128	18.8048	0	0	3.29151	15.2904	32.6897	44.0646	331.557	0	406.996	348.648	257.173	312.824	77.7241	0	0	367.199	371.509	315.257	402.431	94.7568	210.765	12.5991	153.826
ZNF516_c.239A>G_p.H80R	ZNF516_18:76442816_A>G_5	97.6272	106.917	0	856.508	237.411	30.7784	0	0	0	5.39638	1.59128	9.40241	0	348.448	0.365723	5.09681	3.63219	6.60969	110.35	0	129.892	104.074	105.576	127.312	16.002	0	0	121.245	102.165	150.623	129.55	42.6406	75.2731	3.06464	65.0802
ZNF516_c.239A>G_p.H80R	ZNF516_18:76442816_A>G_3	102.986	225.906	0	0	0	0	0	0	0	5.39638	0.795638	9.40241	0	0	2.3772	20.3872	36.3219	28.642	264.891	0	236.693	226.361	192.203	109.125	32.0041	0	0	277.131	248.446	262.714	248.074	61.5919	127.964	4.76721	112.411
ZNF492_c.226T>C_p.C76R	ZNF492_19:22663895_T>C_6	129.082	376.453	0	0	0	0	0	0	0	10.7928	0.795638	28.2072	4.12571	0	1.82862	13.5915	25.4253	35.2517	112.969	0	106.8	150.907	105.576	167.325	27.432	0	0	96.9959	116.096	178.645	126.793	47.3784	120.437	3.06464	41.4147
ZNF492_c.226T>C_p.C76R	ZNF492_19:22663895_T>C_5	111.607	492.337	0	0	0	0	0	0	0	10.7928	0.795638	9.40241	1.37524	0	3.84009	39.0756	72.6438	46.2679	139.078	0	184.736	153.509	135.354	214.612	25.146	0	0	145.494	164.857	199.662	154.357	47.3784	97.8551	6.12927	59.1639
ZNF492_c.226T>C_p.C76R	ZNF492_19:22663895_T>C_3	103.452	85.7064	0	0	0	0	0	0	0	10.7928	0.795638	9.40241	2.75047	0	1.64575	20.3872	36.3219	22.0323	90.1558	0	106.8	83.2592	86.6267	127.312	18.288	0	0	100.46	120.74	119.097	99.2296	28.427	105.382	2.72412	59.1639
ZNF492_c.226T>C_p.C76R	ZNF492_19:22663895_T>C_4	125.82	186.761	0	0	0	0	0	0	0	21.5855	1.59128	9.40241	1.37524	0	1.46289	11.8926	29.0575	24.2355	116.772	0	132.779	137.898	113.698	207.337	32.0041	0	0	124.709	148.603	168.137	179.165	35.5338	90.3277	6.12927	70.9966
ZNF492_c.226T>C_p.C76R	ZNF492_19:22663895_T>C_2	75.9581	381.281	0	0	0	0	33.1059	0	0	0	0.795638	0	2.75047	0	2.19434	13.5915	39.9541	33.0485	55.4285	0	77.9354	85.8611	64.9701	141.862	16.002	0	0	58.8904	95.1991	63.0513	46.8584	33.1649	37.6366	3.74567	59.1639
ZNF462_c.4322A>G_p.E1441G	ZNF462_9:106928234_A>G_4	150.052	315.924	0	0	0	0	860.754	0	0	16.1891	1.59128	37.6096	0	0	1.64575	11.8926	36.3219	44.0646	199.661	0	213.601	189.935	167.839	185.512	32.0041	0	0	218.241	197.364	206.668	190.19	59.223	97.8551	4.76721	130.16
ZNF462_c.4322A>G_p.E1441G	ZNF462_9:106928234_A>G_6	181.041	1070.73	0	0	0	0	0	0	0	5.39638	1.59128	28.2072	2.75047	0	6.94874	62.8607	127.127	129.991	279.762	0	213.601	189.935	322.143	178.237	48.0061	0	0	252.882	250.768	171.64	308.714	66.3298	112.91	4.4267	76.913
ZNF462_c.4322A>G_p.E1441G	ZNF462_9:106928234_A>G_3	127.917	119.679	0	0	0	0	0	0	0	0	0	9.40241	1.37524	0	0.182862	3.39787	14.5288	6.60969	192.225	0	190.509	156.111	151.597	160.05	27.432	0	0	180.135	176.467	154.125	151.601	47.3784	82.8004	2.72412	88.7458
ZNF462_c.4322A>G_p.E1441G	ZNF462_9:106928234_A>G_5	123.257	116.919	0	0	0	0	0	0	0	10.7928	0.795638	0	0	0	0.365723	8.49469	0	6.60969	207.096	0	173.19	221.157	213.86	156.412	43.4341	0	0	211.312	178.788	192.657	192.946	40.2716	52.6912	3.74567	94.6622
ZNF462_c.4322A>G_p.E1441G	ZNF462_9:106928234_A>G_2	68.9681	96.2257	0	0	0	0	0	0	0	5.39638	0	0	0	0	0.548585	5.09681	29.0575	11.0162	110.688	0	95.2544	88.4629	89.3338	58.1999	20.574	0	0	90.0676	102.165	73.5599	90.9605	52.1162	52.6912	1.02155	82.8294
ZNF430_c.1199T>C_p.F400S	ZNF430_19:21057507_T>C_6	52.4251	38.8007	0	0	0	0	0	0	0	0	0	0	0	0	0.548585	3.39787	0	6.60969	64.8074	0	89.4814	75.4537	54.1417	105.487	6.85801	0	0	58.8904	78.9456	80.5656	68.9095	33.1649	37.6366	3.40515	29.5819
ZNF430_c.1198T>C_p.F400L	ZNF430_19:21057506_T>C_3	139.8	412.322	0	0	0	0	0	0	0	10.7928	2.38691	18.8048	1.37524	0	4.20582	37.3766	112.598	63.8937	157.667	0	181.849	153.509	143.476	163.687	41.1481	0	0	145.494	148.603	178.645	121.281	49.7473	67.7458	6.12927	88.7458
ZNF430_c.1198T>C_p.F400L	ZNF430_19:21057506_T>C_6	153.78	265.397	0	0	0	0	0	0	0	16.1891	0.795638	0	0	0	2.74292	18.6883	54.4828	50.6743	187.409	0	176.076	171.722	167.839	207.337	45.7201	0	0	180.135	176.467	196.16	179.165	59.223	90.3277	6.12927	70.9966
ZNF430_c.1198T>C_p.F400L	ZNF430_19:21057506_T>C_4	147.489	389.386	0	0	0	0	0	0	0	10.7928	1.59128	18.8048	0	0	4.38868	25.4841	54.4828	48.4711	152.09	0	155.871	166.518	146.183	145.5	32.0041	0	0	148.958	132.35	227.685	195.703	40.2716	97.8551	4.4267	94.6622
ZNF430_c.1198T>C_p.F400L	ZNF430_19:21057506_T>C_5	98.7922	41.3874	0	0	0	0	0	0	0	5.39638	0.795638	9.40241	0	0	0.182862	5.09681	3.63219	11.0162	128.601	0	152.984	124.889	100.162	98.2123	22.86	0	0	142.03	127.706	126.103	104.742	47.3784	82.8004	4.4267	35.4983
ZNF430_c.1198T>C_p.F400L	ZNF430_19:21057506_T>C_2	67.5701	115.885	0	0	0	0	0	0	0	0	0	0	0	0	1.64575	5.09681	7.26438	17.6258	84.7481	0	95.2544	109.278	83.9196	105.487	27.432	0	0	69.2828	109.131	112.091	104.742	30.796	45.1639	1.70258	23.6655
ZNF429_c.926A>G_p.E309G	ZNF429_19:21536979_A>G_2	70.1331	211.076	0	0	0	0	0	0	0	5.39638	0.795638	0	0	0	1.64575	22.0862	43.5863	57.284	112.8	0	89.4814	111.88	148.89	130.95	29.7181	0	0	131.637	123.062	105.086	140.575	37.9027	60.2185	2.04309	29.5819
ZNF429_c.926A>G_p.E309G	ZNF429_19:21536979_A>G_6	71.9971	203.833	0	0	0	0	0	0	0	0	0.795638	18.8048	0	0	1.64575	15.2904	32.6897	19.8291	95.2255	0	106.8	98.8703	148.89	258.262	16.002	0	0	124.709	118.418	112.091	121.281	33.1649	37.6366	2.38361	23.6655
ZNF429_c.926A>G_p.E309G	ZNF429_19:21536979_A>G_4	81.3171	46.9057	0	0	0	0	0	0	0	10.7928	0.795638	0	1.37524	0	0.365723	3.39787	0	2.20323	125.644	0	144.325	114.481	165.132	80.0248	22.86	0	0	124.709	134.672	115.594	146.088	47.3784	97.8551	4.4267	94.6622
ZNF429_c.926A>G_p.E309G	ZNF429_19:21536979_A>G_5	84.3461	136.923	0	0	0	0	0	0	0	5.39638	0.795638	0	0	0	1.64575	8.49469	10.8966	8.81292	137.219	0	132.779	106.676	173.253	156.412	27.432	0	0	152.422	143.96	105.086	159.87	45.0095	82.8004	4.08618	59.1639
ZNF429_c.926A>G_p.E309G	ZNF429_19:21536979_A>G_3	51.9591	27.0742	0	0	0	0	0	0	0	0	0	9.40241	0	0	0.182862	3.39787	3.63219	0	106.21	0	89.4814	109.278	64.9701	50.9249	18.288	0	0	103.924	90.5552	108.588	93.7169	26.0581	30.1092	1.02155	23.6655
ZNF182_c.379A>G_p.K127E	ZNF182_X:47977708_A>G_6	62.6771	61.0464	0	0	0	0	0	0	0	0	0	9.40241	0	0	0.914308	5.09681	10.8966	13.2194	61.8501	0	86.5949	106.676	48.7275	72.7499	25.146	0	0	55.4262	102.165	126.103	66.1531	35.5338	30.1092	2.04309	35.4983
ZNF182_c.379A>G_p.K127E	ZNF182_X:47977708_A>G_2	111.84	87.9482	0	0	0	0	0	0	0	10.7928	0.795638	18.8048	1.37524	0	0.182862	8.49469	10.8966	2.20323	125.982	0	121.233	161.315	151.597	116.4	34.2901	0	0	114.317	132.35	112.091	110.255	33.1649	97.8551	2.38361	94.6622
ZNF182_c.379A>G_p.K127E	ZNF182_X:47977708_A>G_4	93.8992	99.6746	0	0	0	0	0	0	0	5.39638	0	18.8048	0	0	0.365723	5.09681	3.63219	4.40646	115.166	0	127.006	145.704	132.647	167.325	25.146	0	0	128.173	116.096	108.588	104.742	47.3784	112.91	3.74567	100.579
ZNF182_c.379A>G_p.K127E	ZNF182_X:47977708_A>G_3	61.2791	190.382	0	0	0	0	33.1059	0	0	10.7928	0	0	2.75047	0	1.46289	5.09681	32.6897	22.0323	129.192	0	98.1409	83.2592	92.0409	83.6623	29.7181	0	0	107.388	127.706	136.611	143.332	47.3784	90.3277	2.72412	59.1639
ZNF182_c.379A>G_p.K127E	ZNF182_X:47977708_A>G_5	107.879	239.702	0	0	0	0	0	0	0	0	0	9.40241	2.75047	0	1.09717	13.5915	32.6897	30.8452	141.782	0	115.46	192.537	192.203	232.8	43.4341	0	0	162.815	148.603	154.125	124.037	40.2716	90.3277	3.74567	106.495
ZNF135_c.1684A>G_p.I562V	ZNF135_19:58068096_A>G_5	109.277	78.9809	0	0	0	0	0	0	0	10.7928	11.1389	9.40241	0	0	0.548585	10.1936	18.1609	22.0323	241.908	0	259.785	239.37	238.224	167.325	48.0061	0	0	239.026	220.583	185.651	259.1	87.65	112.91	7.83185	118.328
ZNF135_c.1684A>G_p.I562V	ZNF135_19:58068096_A>G_4	110.209	16.2101	0	0	0	0	0	0	0	0	0.795638	9.40241	0	0	0.731447	0	14.5288	13.2194	194	0	228.033	187.333	173.253	112.762	36.5761	0	0	221.705	204.33	227.685	192.946	54.4852	120.437	6.46979	100.579
ZNF135_c.1684A>G_p.I562V	ZNF135_19:58068096_A>G_6	153.314	609.602	0	0	0	0	33.1059	12.4517	0	10.7928	412.936	244.463	9.62665	0	6.2173	57.7639	108.966	90.3325	240.979	0	268.444	275.796	213.86	185.512	32.0041	0	0	242.49	278.631	276.725	283.907	87.65	90.3277	7.49133	100.579
ZNF135_c.1684A>G_p.I562V	ZNF135_19:58068096_A>G_2	82.2491	286.608	0	0	0	0	0	0	0	5.39638	0	0	1.37524	0	1.46289	13.5915	21.7931	19.8291	149.387	0	161.644	176.926	154.304	105.487	29.7181	0	0	124.709	123.062	150.623	151.601	52.1162	120.437	1.70258	53.2475
ZNF135_c.1684A>G_p.I562V	ZNF135_19:58068096_A>G_3	103.452	109.504	0	0	0	0	0	0	0	5.39638	0.795638	0	1.37524	0	1.28003	18.6883	21.7931	19.8291	173.468	0	132.779	150.907	167.839	123.675	20.574	0	0	183.599	206.652	185.651	151.601	68.6987	52.6912	3.06464	35.4983
ZMPSTE24_c.946A>G_p.K316E	ZMPSTE24_1:40281519_A>G_5	58.0171	104.503	0	0	0	0	0	0	0	5.39638	0.795638	18.8048	1.37524	0	0.914308	6.79575	14.5288	4.40646	62.9485	0	49.0705	75.4537	70.3842	69.1124	16.002	0	0	45.0338	58.0482	73.5599	77.1786	28.427	45.1639	3.06464	47.3311
ZMPSTE24_c.946A>G_p.K316E	ZMPSTE24_1:40281519_A>G_3	67.1041	198.142	0	0	0	0	0	0	0	0	0.795638	0	1.37524	0	1.28003	6.79575	18.1609	26672.3	76.2142	0	49.0705	46.8333	92.0409	120.037	18.288	0	0	72.7469	71.9798	38.5314	46.8584	28.427	37.6366	1.36206	23.6655
ZMPSTE24_c.946A>G_p.K316E	ZMPSTE24_1:40281519_A>G_2	44.5031	43.1119	0	0	0	0	0	0	0	0	0	9.40241	0	0	0.731447	5.09681	10.8966	22.0323	49.5139	0	60.6165	49.4352	48.7275	69.1124	20.574	0	0	58.8904	55.7263	49.0399	57.8839	14.2135	15.0546	1.36206	35.4983
ZMPSTE24_c.946A>G_p.K316E	ZMPSTE24_1:40281519_A>G_6	66.6381	32.4201	0	0	0	0	0	0	0	0	1.59128	0	1.37524	0	0	0	3.63219	0	74.1863	0	112.573	70.25	94.748	145.5	18.288	0	0	79.6752	92.8771	94.577	77.1786	47.3784	37.6366	3.06464	82.8294
ZMPSTE24_c.946A>G_p.K316E	ZMPSTE24_1:40281519_A>G_4	44.9691	167.619	0	0	0	0	0	0	0	0	0	9.40241	1.37524	0	2.01148	25.4841	10.8966	26.4388	81.6218	0	98.1409	54.6389	89.3338	98.2123	16.002	0	0	96.9959	92.8771	66.5542	99.2296	33.1649	60.2185	4.08618	41.4147
ZIC3_c.1285A>G_p.T429A	ZIC3_X:137569951_A>G_5	185.002	100.709	0	0	0	0	0	0	0	21.5855	1.59128	9.40241	4.12571	0	0.548585	6.79575	18.1609	2.20323	310.518	0	271.331	286.204	262.587	287.362	38.8621	0	0	356.806	271.666	276.725	344.547	82.9122	97.8551	3.74567	112.411
ZIC3_c.1285A>G_p.T429A	ZIC3_X:137569951_A>G_2	170.789	154.513	0	0	0	0	0	0	0	10.7928	0.795638	0	2.75047	0	1.64575	11.8926	25.4253	8.81292	189.775	0	216.487	221.157	159.718	258.262	38.8621	0	0	214.777	225.227	224.182	237.049	75.8054	120.437	3.74567	124.244
ZIC3_c.1285A>G_p.T429A	ZIC3_X:137569951_A>G_4	163.1	550.97	0	0	0	0	0	0	0	16.1891	1.59128	37.6096	1.37524	0	2.01148	35.6777	58.115	68.3002	232.36	0	236.693	231.565	219.274	214.612	64.0081	0	0	249.418	260.056	220.68	245.318	85.2811	143.019	7.49133	118.328
ZIC3_c.1285A>G_p.T429A	ZIC3_X:137569951_A>G_6	189.429	299.024	0	0	0	0	33.1059	0	0	16.1891	1.59128	28.2072	2.75047	0	2.3772	18.6883	47.2184	28.642	305.279	0	320.401	283.602	332.972	225.525	59.4361	0	0	329.093	276.309	381.811	369.355	75.8054	203.237	7.15082	88.7458
ZIC3_c.1285A>G_p.T429A	ZIC3_X:137569951_A>G_3	115.801	91.5696	0	0	0	0	0	0	0	5.39638	0.795638	18.8048	1.37524	0	0.365723	6.79575	18.1609	6.60969	179.382	0	230.92	179.528	184.082	116.4	43.4341	0	0	169.743	204.33	175.143	176.408	73.4365	82.8004	7.15082	171.575
ZFPM2_c.250T>C_p.S84P	ZFPM2_8:105444330_T>C_5	117.665	78.1187	0	0	0	0	0	0	0	16.1891	0	9.40241	2.75047	0	0	1.69894	10.8966	6.60969	201.52	0	233.806	210.75	197.617	94.5748	45.7201	0	0	232.097	195.042	227.685	195.703	68.6987	67.7458	4.08618	88.7458
ZFPM2_c.250T>C_p.S84P	ZFPM2_8:105444330_T>C_3	137.004	351.793	0	0	0	0	0	0	0	5.39638	0	9.40241	2.75047	0	2.01148	16.9894	50.8506	28.642	186.142	0	184.736	174.324	167.839	149.137	43.4341	0	0	211.312	185.754	178.645	176.408	101.864	112.91	3.06464	147.91
ZFPM2_c.250T>C_p.S84P	ZFPM2_8:105444330_T>C_4	145.159	315.234	0	0	0	0	0	0	0	10.7928	3.18255	9.40241	1.37524	0	1.82862	30.5809	14.5288	39.6582	249.428	0	245.352	247.176	224.688	261.899	34.2901	0	0	193.992	250.768	213.674	275.638	71.0676	233.347	6.8103	82.8294
ZFPM2_c.250T>C_p.S84P	ZFPM2_8:105444330_T>C_6	192.458	215.214	0	0	0	0	0	0	0	0	3.97819	28.2072	5.50094	0	2.19434	10.1936	32.6897	35.2517	184.79	0	164.53	182.13	203.031	240.075	29.7181	0	0	187.063	176.467	203.165	140.575	71.0676	127.964	6.12927	76.913
ZFPM2_c.250T>C_p.S84P	ZFPM2_8:105444330_T>C_2	180.342	733.419	0	0	0	0	761.436	0	0	10.7928	1.59128	9.40241	4.12571	0	4.93726	44.1724	76.2759	88.1292	231.346	0	242.466	267.991	281.537	210.975	41.1481	0	0	214.777	250.768	213.674	261.856	170.562	97.8551	5.44824	130.16
ZACN_c.880A>G_p.I294V	ZACN_17:76081755_A>G_4	95.5302	111.918	0	0	0	0	0	0	0	0	0	9.40241	0	0	0.731447	8.49469	25.4253	15.4226	126.657	0	150.098	122.287	113.698	105.487	41.1481	2715.93	0	117.781	148.603	168.137	140.575	63.9608	105.382	2.38361	112.411
ZACN_c.880A>G_p.I294V	ZACN_17:76081755_A>G_5	126.286	78.2911	0	0	0	0	0	0	0	0	2.38691	18.8048	1.37524	58.0747	0.548585	10.1936	7.26438	6.60969	262.609	0	265.558	281	305.901	156.412	34.2901	0	0	228.633	215.939	199.662	281.151	61.5919	97.8551	3.06464	65.0802
ZACN_c.880A>G_p.I294V	ZACN_17:76081755_A>G_6	155.411	94.5012	0	0	0	0	0	0	0	21.5855	0	9.40241	5.50094	0	1.09717	8.49469	10.8966	11.0162	236.585	0	225.147	236.768	213.86	229.162	32.0041	0	0	207.848	188.076	241.697	281.151	75.8054	90.3277	6.12927	65.0802
ZACN_c.880A>G_p.I294V	ZACN_17:76081755_A>G_3	140.732	67.2545	0	0	0	0	0	0	0	5.39638	1.59128	0	2.75047	0	0.914308	6.79575	14.5288	8.81292	275.537	0	225.147	252.38	235.516	170.962	41.1481	0	0	249.418	271.666	248.702	228.779	59.223	120.437	7.83185	165.659
ZACN_c.880A>G_p.I294V	ZACN_17:76081755_A>G_2	182.206	380.247	0	0	0	0	0	0	0	21.5855	1.59128	9.40241	2.75047	0	2.3772	18.6883	43.5863	37.4549	360.032	0	311.742	346.046	316.729	272.812	57.1501	0	0	315.237	283.275	315.257	286.663	118.446	150.546	5.78876	118.328
XIRP2_c.5228T>C_p.V1743A	XIRP2_2:167246620_T>C_2	131.878	249.876	0	0	0	0	0	0	0	21.5855	2.38691	9.40241	1.37524	0	1.09717	22.0862	21.7931	17.6258	134.262	0	118.346	122.287	151.597	218.25	34.2901	0	0	107.388	116.096	150.623	118.524	33.1649	75.2731	3.40515	47.3311
XIRP2_c.5228T>C_p.V1743A	XIRP2_2:167246620_T>C_6	126.985	357.311	0	0	0	0	0	0	0	21.5855	1.59128	47.0121	0	0	2.01148	20.3872	47.2184	37.4549	201.013	0	167.417	182.13	184.082	134.587	29.7181	0	0	187.063	197.364	154.125	179.165	35.5338	105.382	3.06464	59.1639
XIRP2_c.5228T>C_p.V1743A	XIRP2_2:167246620_T>C_4	138.635	203.488	0	0	0	0	0	0	0	0	2.38691	9.40241	1.37524	0	1.82862	13.5915	25.4253	28.642	187.494	0	178.963	176.926	181.375	247.349	11.43	0	0	180.135	199.686	217.177	140.575	40.2716	97.8551	2.04309	112.411
XIRP2_c.5228T>C_p.V1743A	XIRP2_2:167246620_T>C_3	90.1712	28.7987	0	0	0	0	0	0	0	0	0.795638	0	0	0	0.182862	0	3.63219	2.20323	158.934	0	121.233	127.491	116.405	149.137	18.288	115.571	0	166.279	125.384	136.611	154.357	23.6892	60.2185	1.70258	35.4983
XIRP2_c.5228T>C_p.V1743A	XIRP2_2:167246620_T>C_5	166.129	194.693	0	0	0	0	0	0	0	5.39638	0	0	1.37524	0	0.365723	8.49469	10.8966	15.4226	225.009	0	225.147	192.537	165.132	283.724	93.7262	0	0	270.203	171.823	241.697	253.587	123.184	263.456	12.5991	5632.4
WRN_c.3946A>G_p.I1316V	WRN_8:31157494_A>G_3	99.2582	268.673	0	0	0	0	0	0	0	16.1891	3.97819	18.8048	1.37524	0	1.09717	13.5915	25.4253	24.2355	93.7891	0	89.4814	106.676	83.9196	116.4	18.288	0	0	138.566	113.774	101.583	115.768	37.9027	37.6366	2.04309	23.6655
WRN_c.3946A>G_p.I1316V	WRN_8:31157494_A>G_6	82.7151	171.93	0	0	0	0	0	0	0	10.7928	1.59128	18.8048	0	0	1.46289	15.2904	36.3219	46.2679	77.3126	0	83.7084	70.25	73.0913	98.2123	22.86	0	0	48.4979	81.2675	98.0798	60.6403	16.5824	22.5819	1.36206	47.3311
WRN_c.3946A>G_p.I1316V	WRN_8:31157494_A>G_2	75.9581	37.0762	0	0	0	0	0	0	0	0	0.795638	0	0	0	0.365723	5.09681	7.26438	0	102.83	0	89.4814	93.6666	119.112	120.037	9.14402	0	0	110.852	102.165	119.097	88.2041	18.9514	45.1639	1.70258	59.1639
WRN_c.3946A>G_p.I1316V	WRN_8:31157494_A>G_4	87.6081	268.846	0	0	0	0	0	0	0	5.39638	2.38691	9.40241	4.12571	0	2.19434	27.183	54.4828	55.0808	103.252	0	89.4814	122.287	211.153	240.075	25.146	57.7857	0	131.637	195.042	126.103	126.793	26.0581	60.2185	2.38361	53.2475
WRN_c.3946A>G_p.I1316V	WRN_8:31157494_A>G_5	63.6091	147.787	0	0	0	0	0	0	0	16.1891	0	9.40241	1.37524	0	1.09717	8.49469	10.8966	8.81292	71.567	0	103.914	104.074	51.4346	127.312	27.432	0	0	76.2111	85.9113	87.5713	85.4477	16.5824	75.2731	2.04309	53.2475
WNK2_c.5698A>G_p.M1900V	WNK2_9:93293052_A>G_3	93.4332	146.58	0	0	0	0	0	0	0	5.39638	0	9.40241	4.12571	0	0.731447	8.49469	10.8966	19.8291	236.501	0	239.579	197.741	268.001	109.125	29.7181	0	0	242.49	222.905	227.685	168.139	82.9122	173.128	5.78876	153.826
WNK2_c.5698A>G_p.M1900V	WNK2_9:93293052_A>G_2	116.733	100.364	0	0	0	0	0	0	0	5.39638	2.38691	9.40241	4.12571	0	0.548585	13.5915	25.4253	24.2355	250.358	0	288.65	249.778	249.052	134.587	34.2901	0	0	273.667	278.631	234.691	270.125	71.0676	97.8551	5.44824	82.8294
WNK2_c.5698A>G_p.M1900V	WNK2_9:93293052_A>G_5	169.391	86.0513	0	0	0	0	0	0	0	16.1891	0.795638	0	1.37524	0	0.731447	10.1936	10.8966	26.4388	178.03	0	158.757	197.741	173.253	167.325	16.002	0	0	214.777	169.501	185.651	181.921	49.7473	120.437	4.76721	100.579
WNK2_c.5698A>G_p.M1900V	WNK2_9:93293052_A>G_6	89.7052	211.938	0	0	0	0	0	0	0	16.1891	0	0	0	0	0.731447	10.1936	10.8966	24.2355	203.041	0	204.941	195.139	224.688	141.862	27.432	0	0	190.528	211.295	224.182	176.408	49.7473	120.437	5.78876	88.7458
WNK2_c.5698A>G_p.M1900V	WNK2_9:93293052_A>G_4	138.402	251.256	0	0	0	0	0	0	0	0	0.795638	9.40241	0	0	2.01148	22.0862	65.3794	39.6582	170.595	0	129.892	150.907	165.132	160.05	41.1481	0	0	142.03	176.467	133.108	137.819	42.6406	120.437	4.08618	47.3311
WDR60_c.518A>G_p.D173G	WDR60_7:158876636_A>G_4	72.9291	315.406	0	0	0	0	0	0	0	10.7928	0.795638	28.2072	2.75047	0	2.19434	23.7851	25.4253	22.0323	107.308	0	60.6165	114.481	97.4551	101.85	22.86	0	0	114.317	83.5894	108.588	96.4732	14.2135	45.1639	3.06464	17.7492
WDR60_c.518A>G_p.D173G	WDR60_7:158876636_A>G_6	93.4332	60.3566	0	0	0	0	0	0	0	0	0	0	1.37524	0	0.548585	5.09681	21.7931	13.2194	119.56	0	101.027	111.88	127.233	101.85	34.2901	0	0	103.924	97.521	112.091	101.986	40.2716	37.6366	5.10773	23.6655
WDR60_c.518A>G_p.D173G	WDR60_7:158876636_A>G_3	58.9491	23.4528	0	0	0	0	0	0	0	0	1.59128	0	0	0	0	1.69894	0	4.40646	116.856	0	121.233	119.685	108.283	65.4749	11.43	0	0	159.35	127.706	126.103	132.306	40.2716	67.7458	2.04309	59.1639
WDR60_c.518A>G_p.D173G	WDR60_7:158876636_A>G_5	73.1621	38.9731	0	0	0	0	0	0	0	0	0	0	4.12571	0	0.182862	1.69894	3.63219	2.20323	95.5635	0	101.027	91.0648	89.3338	94.5748	29.7181	0	0	155.886	102.165	94.577	99.2296	14.2135	52.6912	2.38361	59.1639
WDR60_c.518A>G_p.D173G	WDR60_7:158876636_A>G_2	44.0371	146.408	0	0	0	0	0	0	0	0	0.795638	0	0	0	0.914308	10.1936	10.8966	4.40646	60.8362	0	43.2975	83.2592	78.5055	83.6623	11.43	0	0	62.3545	55.7263	52.5428	49.6148	11.8446	52.6912	1.02155	29.5819
WDR45B_c.931A>G_p.I311V	WDR45B_17:82616023_A>G_5	103.918	102.606	0	0	0	0	0	0	0	5.39638	0	18.8048	0	0	1.09717	10.1936	14.5288	13.2194	151.583	0	152.984	176.926	154.304	109.125	25.146	0	0	162.815	164.857	150.623	187.434	40.2716	97.8551	5.10773	47.3311
WDR45B_c.931A>G_p.I311V	WDR45B_17:82616023_A>G_6	91.3362	203.488	0	0	0	0	0	0	0	0	1.59128	9.40241	1.37524	0	1.46289	23.7851	32.6897	19.8291	120.658	0	106.8	140.5	135.354	112.762	27.432	57.7857	0	100.46	134.672	143.617	135.063	40.2716	82.8004	1.70258	59.1639
WDR45B_c.931A>G_p.I311V	WDR45B_17:82616023_A>G_4	111.374	369.037	0	0	0	0	0	0	0	10.7928	0.795638	18.8048	1.37524	0	1.82862	33.9787	25.4253	39.6582	148.964	0	170.303	150.907	102.869	160.05	22.86	0	0	183.599	174.145	168.137	135.063	80.5433	75.2731	4.4267	76.913
WDR45B_c.931A>G_p.I311V	WDR45B_17:82616023_A>G_2	152.848	346.792	0	0	0	0	0	0	0	16.1891	0.795638	0	2.75047	0	2.19434	20.3872	50.8506	35.2517	221.376	0	216.487	231.565	213.86	265.537	41.1481	0	0	256.346	232.193	213.674	237.049	66.3298	90.3277	6.12927	118.328
WDR45B_c.931A>G_p.I311V	WDR45B_17:82616023_A>G_3	85.7441	97.7777	0	0	0	0	0	0	0	0	0.795638	9.40241	0	0	0.365723	3.39787	10.8966	8.81292	110.012	0	121.233	122.287	92.0409	76.3873	25.146	0	0	117.781	155.569	122.6	110.255	23.6892	22.5819	2.38361	47.3311
VWDE_c.652A>G_p.K218E	VWDE_7:12380623_A>G_5	58.0171	112.263	0	0	0	0	33.1059	0	0	5.39638	0.795638	0	1.37524	0	1.46289	8.49469	18.1609	11.0162	90.8318	0	83.7084	88.4629	83.9196	76.3873	22.86	0	0	100.46	102.165	122.6	79.935	18.9514	37.6366	2.38361	41.4147
VWDE_c.652A>G_p.K218E	VWDE_7:12380623_A>G_6	45.4351	178.311	0	0	0	0	0	0	0	0	1.59128	9.40241	0	0	2.19434	13.5915	7.26438	19.8291	60.5827	0	66.3895	70.25	78.5055	87.2998	18.288	0	0	72.7469	71.9798	91.0741	63.3967	18.9514	30.1092	2.38361	23.6655
VWDE_c.652A>G_p.K218E	VWDE_7:12380623_A>G_4	52.1921	41.2149	0	0	0	0	0	0	0	0	0	0	0	0	0.731447	8.49469	14.5288	8.81292	59.0618	0	51.957	54.6389	64.9701	76.3873	18.288	0	0	45.0338	44.1166	45.5371	66.1531	21.3203	7.52731	0.68103	35.4983
VWDE_c.652A>G_p.K218E	VWDE_7:12380623_A>G_3	104.151	183.139	0	0	0	0	0	0	0	0	0.795638	18.8048	0	0	1.64575	18.6883	3.63219	19.8291	107.731	0	80.8219	59.8426	138.061	130.95	25.146	0	0	90.0676	90.5552	115.594	90.9605	45.0095	37.6366	5.44824	47.3311
VWDE_c.652A>G_p.K218E	VWDE_7:12380623_A>G_2	110.908	165.205	0	0	0	0	0	12.4517	0	10.7928	2.38691	9.40241	1.37524	0	361.7	69.6564	138.023	121.178	136.628	0	115.46	124.889	124.526	170.962	25.146	0	0	131.637	130.028	161.131	126.793	33.1649	67.7458	4.76721	47.3311
VWDE_c.2102A>G_p.H701R	VWDE_7:12370204_A>G_5	117.199	240.737	0	0	0	0	0	0	0	5.39638	0.795638	28.2072	0	0	0.548585	23.7851	32.6897	17.6258	153.865	0	135.665	135.296	151.597	163.687	25.146	0	0	86.6035	120.74	185.651	140.575	40.2716	67.7458	3.40515	41.4147
VWDE_c.2102A>G_p.H701R	VWDE_7:12370204_A>G_4	52.6581	82.9472	0	0	0	0	0	0	0	0	0.795638	0	0	0	0.731447	5.09681	36.3219	11.0162	128.516	0	103.914	137.898	108.283	69.1124	13.716	0	0	114.317	116.096	112.091	118.524	33.1649	52.6912	2.04309	29.5819
VWDE_c.2102A>G_p.H701R	VWDE_7:12370204_A>G_2	121.393	422.841	0	0	0	0	0	0	0	5.39638	0.795638	18.8048	4.12571	0	1.46289	25.4841	47.2184	39.6582	169.243	0	178.963	189.935	162.425	225.525	41.1481	0	0	148.958	146.281	150.623	146.088	42.6406	67.7458	4.08618	94.6622
VWDE_c.2102A>G_p.H701R	VWDE_7:12370204_A>G_6	77.8221	332.479	0	0	0	0	0	0	0	5.39638	3.18255	9.40241	0	0	1.46289	22.0862	65.3794	30.8452	109.843	0	98.1409	72.8518	140.768	116.4	16.002	0	0	86.6035	95.1991	77.0627	99.2296	30.796	75.2731	3.06464	59.1639
VWDE_c.2102A>G_p.H701R	VWDE_7:12370204_A>G_3	106.947	83.9819	0	0	0	0	0	0	0	10.7928	0	0	0	0	0.182862	5.09681	3.63219	4.40646	149.133	0	161.644	143.102	132.647	149.137	137926	0	0	121.245	169.501	154.125	173.652	3290.43	6752	304.42	5857.22
VPS33B_c.125A>G_p.E42G	VPS33B_15:91017857_A>G_3	93.4332	78.4636	0	0	0	0	33.1059	0	0	5.39638	1.59128	9.40241	0	0	0.914308	8.49469	14.5288	15.4226	181.072	0	167.417	119.685	175.961	98.2123	29.7181	0	0	169.743	171.823	136.611	195.703	28.427	52.6912	2.38361	47.3311
VPS33B_c.125A>G_p.E42G	VPS33B_15:91017857_A>G_2	91.8022	253.67	0	0	0	0	0	0	0	21.5855	1.59128	9.40241	1.37524	0	2.3772	10.1936	43.5863	13.2194	104.435	0	121.233	91.0648	124.526	105.487	22.86	0	0	83.1393	113.774	119.097	104.742	35.5338	45.1639	1.70258	47.3311
VPS33B_c.125A>G_p.E42G	VPS33B_15:91017857_A>G_6	155.178	201.074	0	0	0	0	0	12.4517	0	91.7384	1284.16	592.352	8.25141	0	5074.78	739.038	1580	1277.87	198.9	0	144.325	202.944	208.446	218.25	34.2901	0	0	183.599	222.905	143.617	157.114	47.3784	120.437	5.44824	100.579
VPS33B_c.125A>G_p.E42G	VPS33B_15:91017857_A>G_5	123.024	212.11	0	0	0	0	0	0	8.88647	5.39638	19.0953	0	0	0	90.3336	32.2798	116.23	77.1131	173.721	0	138.552	163.917	192.203	221.887	34.2901	0	0	183.599	174.145	140.114	184.677	47.3784	158.074	4.08618	70.9966
VPS33B_c.125A>G_p.E42G	VPS33B_15:91017857_A>G_4	89.2392	73.9799	0	0	0	0	0	0	0	0	0.795638	0	0	0	0.365723	1.69894	21.7931	11.0162	142.796	0	103.914	150.907	135.354	160.05	16.002	0	0	114.317	81.2675	122.6	129.55	35.5338	52.6912	3.40515	53.2475
VPS13B_c.7006A>G_p.M2336V	VPS13B_8:99720928_A>G_3	72.4631	121.92	0	0	0	0	0	0	0	0	1.59128	0	1.37524	0	0.548585	6.79575	14.5288	15.4226	88.8039	0	101.027	54.6389	97.4551	72.7499	6.85801	0	0	83.1393	95.1991	73.5599	101.986	16.5824	37.6366	2.38361	47.3311
VPS13B_c.7006A>G_p.M2336V	VPS13B_8:99720928_A>G_5	84.1131	40.1802	0	0	0	0	0	0	0	5.39638	0.795638	0	0	0	0.182862	0	7.26438	4.40646	133.248	0	86.5949	109.278	140.768	61.8374	18.288	0	0	93.5317	148.603	91.0741	107.499	61.5919	75.2731	1.70258	53.2475
VPS13B_c.7006A>G_p.M2336V	VPS13B_8:99720928_A>G_6	102.287	128.473	0	0	0	0	0	0	0	16.1891	1.59128	9.40241	1.37524	0	1.09717	5.09681	29.0575	17.6258	168.229	0	170.303	132.694	162.425	225.525	50.2921	0	0	190.528	169.501	196.16	151.601	49.7473	75.2731	5.10773	94.6622
VPS13B_c.7006A>G_p.M2336V	VPS13B_8:99720928_A>G_4	61.9781	17.0723	0	0	0	0	0	0	0	10.7928	0	9.40241	0	0	0.182862	3.39787	3.63219	6.60969	81.1149	0	106.8	80.6574	81.2126	72.7499	20.574	0	0	65.8186	65.014	87.5713	88.2041	16.5824	97.8551	2.72412	59.1639
VPS13B_c.7006A>G_p.M2336V	VPS13B_8:99720928_A>G_2	78.7541	28.7987	0	0	0	0	0	0	0	16.1891	0	0	2.75047	0	0.182862	6.79575	3.63219	11.0162	121.334	0	89.4814	130.093	97.4551	116.4	16.002	0	0	131.637	130.028	91.0741	90.9605	21.3203	105.382	2.04309	76.913
VEZF1_c.659A>G_p.H220R	VEZF1_17:57982768_A>G_6	164.498	419.737	0	0	0	0	0	0	0	26.9819	0.795638	9.40241	0	0	2.19434	30.5809	47.2184	41.8614	227.122	0	210.714	202.944	170.546	210.975	43.4341	0	0	239.026	218.261	238.194	212.241	45.0095	105.382	5.10773	112.411
VEZF1_c.659A>G_p.H220R	VEZF1_17:57982768_A>G_2	142.363	202.108	0	0	0	0	0	0	0	5.39638	1.59128	18.8048	1.37524	0	0.914308	6.79575	18.1609	24.2355	257.962	0	210.714	223.759	238.224	214.612	32.0041	0	0	200.92	204.33	241.697	234.292	49.7473	105.382	4.76721	88.7458
VEZF1_c.659A>G_p.H220R	VEZF1_17:57982768_A>G_5	153.78	163.135	0	0	0	0	0	0	0	0	0.795638	18.8048	0	0	0.731447	6.79575	25.4253	8.81292	188.508	0	216.487	200.343	175.961	207.337	54.8641	0	0	256.346	211.295	224.182	226.023	63.9608	97.8551	7.15082	100.579
VEZF1_c.659A>G_p.H220R	VEZF1_17:57982768_A>G_4	135.839	488.544	0	0	0	0	33.1059	0	0	0	1.59128	0	2.75047	0	2.74292	18.6883	76.2759	50.6743	206.674	0	199.168	197.741	205.738	145.5	41.1481	0	0	218.241	290.241	196.16	176.408	40.2716	143.019	4.4267	82.8294
VEZF1_c.659A>G_p.H220R	VEZF1_17:57982768_A>G_3	130.48	118.989	0	0	0	0	0	0	0	5.39638	0	9.40241	1.37524	0	1.46289	11.8926	7.26438	11.0162	197.633	0	187.622	223.759	162.425	163.687	52.5781	0	0	252.882	192.72	185.651	203.972	59.223	127.964	5.44824	153.826
USP6NL_c.44A>G_p.Y15C	USP6NL_10:11532189_A>G_4	52.4251	14.658	0	0	0	0	0	0	0	5.39638	0	0	1.37524	0	0.182862	0	0	6.60969	56.02	0	40.411	46.8333	78.5055	83.6623	11.43	0	0	41.5697	58.0482	42.0342	49.6148	26.0581	15.0546	0.68103	17.7492
USP6NL_c.44A>G_p.Y15C	USP6NL_10:11532189_A>G_2	101.122	286.608	0	0	0	0	0	0	0	5.39638	0.795638	9.40241	2.75047	0	1.09717	18.6883	14.5288	28.642	101.14	0	95.2544	96.2685	89.3338	94.5748	20.574	1849.14	0	114.317	106.809	73.5599	110.255	30.796	75.2731	2.72412	65.0802
USP6NL_c.44A>G_p.Y15C	USP6NL_10:11532189_A>G_3	51.7261	52.5965	0	0	0	0	0	0	0	0	0.795638	9.40241	0	0	0	1.69894	3.63219	4.40646	99.5347	0	92.3679	104.074	148.89	58.1999	18.288	0	0	90.0676	99.8429	101.583	90.9605	23.6892	37.6366	1.36206	41.4147
USP6NL_c.44A>G_p.Y15C	USP6NL_10:11532189_A>G_6	34.7171	18.9692	0	0	0	0	0	0	0	5.39638	0	0	0	0	0.548585	1.69894	0	0	71.06	0	92.3679	67.6481	83.9196	43.6499	6.85801	0	0	72.7469	88.2333	84.0684	82.6913	42.6406	15.0546	2.04309	29.5819
USP6NL_c.44A>G_p.Y15C	USP6NL_10:11532189_A>G_5	47.9981	25.1773	0	0	0	0	0	0	0	5.39638	0.795638	0	0	0	0.365723	3.39787	0	0	63.4555	0	75.0489	83.2592	86.6267	54.5624	18.288	0	0	93.5317	92.8771	87.5713	55.1276	21.3203	60.2185	2.38361	5.91639
USF3_c.572A>G_p.N191S	USF3_3:113661110_A>G_3	95.5302	68.1167	0	0	0	0	0	0	0	16.1891	0.795638	9.40241	2.75047	0	1.09717	1.69894	7.26438	6.60969	185.888	0	161.644	137.898	203.031	123.675	11.43	0	0	145.494	171.823	171.64	151.601	33.1649	97.8551	3.40515	59.1639
USF3_c.572A>G_p.N191S	USF3_3:113661110_A>G_6	115.568	123.645	0	0	0	0	0	0	0	26.9819	0	9.40241	2.75047	0	1.09717	6.79575	10.8966	17.6258	189.606	0	239.579	195.139	151.597	174.6	34.2901	0	0	148.958	188.076	161.131	203.972	54.4852	105.382	5.78876	65.0802
USF3_c.572A>G_p.N191S	USF3_3:113661110_A>G_5	136.072	208.834	0	0	0	0	0	0	0	5.39638	0.795638	0	2.75047	0	2.3772	11.8926	36.3219	22.0323	162.737	0	138.552	176.926	194.91	236.437	22.86	0	0	138.566	155.569	161.131	137.819	52.1162	97.8551	3.74567	88.7458
USF3_c.572A>G_p.N191S	USF3_3:113661110_A>G_2	115.335	553.901	0	0	0	0	0	0	0	10.7928	0.795638	9.40241	2.75047	0	3.10865	42.4734	61.7472	63.8937	181.664	0	173.19	208.148	162.425	145.5	41.1481	0	0	152.422	174.145	192.657	212.241	26.0581	105.382	4.4267	41.4147
USF3_c.572A>G_p.N191S	USF3_3:113661110_A>G_4	88.0741	311.268	0	0	0	0	0	0	0	21.5855	3.97819	9.40241	1.37524	0	2.74292	30.5809	58.115	33.0485	183.269	0	210.714	176.926	159.718	76.3873	27.432	0	0	197.456	169.501	189.154	192.946	45.0095	90.3277	4.08618	100.579
UGT2B11_c.1442A>G_p.H481R	UGT2B11_4:69200588_A>G_2	159.372	376.453	0	0	0	0	0	0	0	16.1891	1.59128	18.8048	1.37524	0	3.47437	28.8819	47.2184	44.0646	301.646	0	265.558	325.231	305.901	283.724	29.7181	0	0	245.954	225.227	262.714	212.241	45.0095	105.382	4.4267	59.1639
UGT2B11_c.1442A>G_p.H481R	UGT2B11_4:69200588_A>G_6	191.759	285.4	0	0	0	0	33.1059	0	0	10.7928	0	28.2072	4.12571	0	1.64575	11.8926	47.2184	37.4549	332.655	0	331.947	364.259	357.335	229.162	61.7221	0	0	308.308	287.919	336.274	314.227	75.8054	127.964	5.10773	106.495
UGT2B11_c.1442A>G_p.H481R	UGT2B11_4:69200588_A>G_4	140.965	172.792	0	0	0	0	0	0	0	1850.96	0.795638	9.40241	2.75047	0	12068.3	1755	3414.26	3014.02	216.898	0	213.601	215.954	224.688	123.675	36.5761	57.7857	0	197.456	225.227	252.205	234.292	47.3784	120.437	4.4267	112.411
UGT2B11_c.1442A>G_p.H481R	UGT2B11_4:69200588_A>G_5	123.257	256.429	0	0	0	0	0	0	0	16.1891	0	9.40241	1.37524	0	1.28003	18.6883	32.6897	28.642	252.47	0	297.309	254.981	246.345	170.962	66.2941	0	0	266.739	264.7	220.68	228.779	87.65	105.382	2.38361	70.9966
UGT2B11_c.1442A>G_p.H481R	UGT2B11_4:69200588_A>G_3	166.129	113.815	0	0	0	0	0	0	0	0	0	0	2.75047	0	0.548585	3.39787	0	6.60969	252.639	0	230.92	257.583	216.567	236.437	38.8621	0	0	197.456	260.056	210.171	250.83	40.2716	75.2731	4.08618	76.913
UBR1_c.3740A>G_p.N1247S	UBR1_15:42998185_A>G_2	70.1331	28.9712	0	0	0	0	0	0	0	0	0	0	1.37524	0	0.548585	0	0	0	67.5112	0	83.7084	57.2407	70.3842	76.3873	29.7181	0	0	79.6752	71.9798	84.0684	93.7169	16.5824	45.1639	2.72412	35.4983
UBR1_c.3740A>G_p.N1247S	UBR1_15:42998185_A>G_4	22.834	3.96629	0	0	0	0	0	0	0	0	0	0	0	0	0	0	0	0	32.6994	0	25.9785	28.6204	35.1921	29.0999	13.716	0	0	45.0338	41.7947	31.5257	55.1276	16.5824	15.0546	1.36206	29.5819
UBR1_c.3740A>G_p.N1247S	UBR1_15:42998185_A>G_3	41.2411	157.789	0	0	0	0	0	0	0	0	0	0	0	0	0.914308	6.79575	14.5288	24.2355	39.5435	0	34.638	57.2407	46.0205	47.2874	20.574	0	0	45.0338	51.0824	73.5599	49.6148	21.3203	37.6366	2.72412	47.3311
UBR1_c.3740A>G_p.N1247S	UBR1_15:42998185_A>G_5	25.63	59.4944	0	0	0	0	0	0	0	0	0.795638	0	0	0	0.365723	1.69894	0	4.40646	36.2482	0	28.865	31.2222	43.3134	47.2874	6.85801	0	0	45.0338	34.8289	21.0171	22.051	7.10676	22.5819	1.70258	11.8328
UBR1_c.3740A>G_p.N1247S	UBR1_15:42998185_A>G_6	14.446	13.7958	0	0	0	0	0	0	0	0	0.795638	0	0	0	0	3.39787	0	2.20323	14.1951	0	40.411	31.2222	18.9496	69.1124	4.57201	0	0	31.1772	13.9316	21.0171	49.6148	9.47568	15.0546	0.68103	23.6655
UBAP2_c.2906A>G_p.D969G	UBAP2_9:33923284_A>G_4	41.0081	35.0068	0	0	0	0	0	0	0	0	0.795638	0	0	0	0.182862	3.39787	3.63219	2.20323	114.49	0	98.1409	96.2685	124.526	65.4749	25.146	0	0	117.781	120.74	101.583	129.55	47.3784	90.3277	1.70258	29.5819
UBAP2_c.2906A>G_p.D969G	UBAP2_9:33923284_A>G_2	142.13	349.206	0	0	0	0	0	0	0	21.5855	1.59128	18.8048	1.37524	0	1.82862	25.4841	39.9541	24.2355	182.001	0	213.601	176.926	170.546	214.612	27.432	57.7857	0	173.207	155.569	210.171	168.139	45.0095	75.2731	3.40515	94.6622
UBAP2_c.2906A>G_p.D969G	UBAP2_9:33923284_A>G_3	111.141	121.575	0	0	0	0	0	0	0	0	0.795638	9.40241	0	0	1.28003	11.8926	32.6897	30.8452	186.987	0	161.644	156.111	186.789	196.425	29.7181	0	0	135.101	181.11	136.611	184.677	37.9027	60.2185	0.68103	53.2475
UBAP2_c.2906A>G_p.D969G	UBAP2_9:33923284_A>G_5	43.1051	74.4973	0	0	0	0	33.1059	0	0	5.39638	0.795638	9.40241	0	0	0.365723	5.09681	3.63219	13.2194	186.395	0	164.53	137.898	203.031	83.6623	27.432	0	0	183.599	162.535	143.617	173.652	52.1162	82.8004	3.40515	106.495
UBAP2_c.2906A>G_p.D969G	UBAP2_9:33923284_A>G_6	119.995	125.887	0	0	0	0	0	0	0	16.1891	0.795638	9.40241	0	0	1.46289	8.49469	43.5863	8.81292	220.109	0	199.168	223.759	249.052	196.425	48.0061	0	0	176.671	181.11	206.668	173.652	59.223	97.8551	2.72412	94.6622
TUBGCP6_c.3613A>G_p.M1205V	TUBGCP6_22:50220746_A>G_6	110.908	332.306	0	0	0	0	33.1059	0	0	16.1891	0	18.8048	0	0	3.29151	35.6777	43.5863	50.6743	269.707	0	285.763	288.805	240.931	123.675	57.1501	0	0	284.059	257.734	273.222	286.663	165.824	135.492	7.15082	130.16
TUBGCP6_c.3613A>G_p.M1205V	TUBGCP6_22:50220746_A>G_3	102.753	119.679	0	0	0	0	0	0	0	21.5855	0.795638	18.8048	0	0	1.09717	8.49469	14.5288	17.6258	151.583	0	129.892	148.306	132.647	109.125	27.432	57.7857	0	190.528	139.316	140.114	121.281	45.0095	67.7458	5.44824	65.0802
TUBGCP6_c.3613A>G_p.M1205V	TUBGCP6_22:50220746_A>G_4	53.1241	72.7728	0	0	0	0	0	0	0	5.39638	0.795638	9.40241	1.37524	0	0	3.39787	7.26438	11.0162	123.785	0	150.098	156.111	94.748	54.5624	25.146	57.7857	0	117.781	104.487	140.114	110.255	21.3203	45.1639	5.44824	82.8294
TUBGCP6_c.3613A>G_p.M1205V	TUBGCP6_22:50220746_A>G_5	87.1421	181.932	0	0	0	0	0	0	0	0	0.795638	18.8048	0	0	2.19434	33.9787	18.1609	30.8452	199.745	0	178.963	210.75	314.022	229.162	32.0041	0	0	180.135	185.754	199.662	187.434	49.7473	45.1639	6.12927	88.7458
TUBGCP6_c.3613A>G_p.M1205V	TUBGCP6_22:50220746_A>G_2	129.082	81.5676	0	0	0	0	0	0	0	10.7928	0.795638	0	1.37524	0	0.365723	5.09681	7.26438	2.20323	171.693	0	210.714	158.713	105.576	152.775	22.86	0	0	193.992	134.672	154.125	151.601	63.9608	82.8004	4.4267	130.16
TUBB8_c.314A>G_p.H105R	TUBB8_10:48078_A>G_5	99.7242	58.8046	0	0	0	0	0	0	0	5.39638	0	28.2072	0	0	0.182862	1.69894	14.5288	6.60969	150.147	0	147.211	156.111	140.768	149.137	32.0041	0	0	155.886	127.706	122.6	143.332	35.5338	180.655	10.2155	82.8294
TUBB8_c.314A>G_p.H105R	TUBB8_10:48078_A>G_3	122.791	560.454	0	0	0	0	66.2119	0	0	43.171	0	18.8048	1.37524	0	5.30299	50.9681	79.9081	90.3325	210.814	0	193.395	158.713	284.244	280.087	61.7221	115.571	0	228.633	204.33	189.154	192.946	42.6406	60.2185	30.6464	88.7458
TUBB8_c.314A>G_p.H105R	TUBB8_10:48078_A>G_2	173.352	230.39	0	0	0	0	0	0	0	5.39638	0	9.40241	0	0	0.548585	6.79575	18.1609	15.4226	242.415	0	207.828	215.954	211.153	181.875	2738.63	0	0	193.992	262.378	234.691	184.677	4465.41	8558.55	29341.2	7395.48
TUBB8_c.314A>G_p.H105R	TUBB8_10:48078_A>G_6	58.4831	37.766	0	0	0	0	0	0	0	5.39638	1.59128	0	0	0	0.182862	1.69894	3.63219	2.20323	193.915	0	144.325	189.935	157.011	109.125	9.14402	0	0	176.671	185.754	175.143	148.844	40.2716	90.3277	4.76721	112.411
TUBB8_c.314A>G_p.H105R	TUBB8_10:48078_A>G_4	100.889	138.82	0	0	0	0	66.2119	0	0	5.39638	0.795638	0	0	0	1.46289	13.5915	25.4253	8.81292	214.87	0	187.622	208.148	178.668	141.862	18.288	0	0	204.384	174.145	210.171	214.998	66.3298	90.3277	4.76721	76.913
TTLL4_c.601A>G_p.I201V	TTLL4_2:218738277_A>G_4	188.264	487.681	0	0	0	0	0	0	0	5.39638	0.795638	28.2072	1.37524	0	2252.12	395.852	650.162	572.84	283.564	0	340.607	247.176	289.658	254.624	52.5781	0	0	218.241	278.631	262.714	314.227	165.824	105.382	7.49133	124.244
TTLL4_c.601A>G_p.I201V	TTLL4_2:218738277_A>G_5	139.567	308.508	0	0	0	0	0	0	0	5.39638	2.38691	18.8048	1.37524	0	1.09717	11.8926	43.5863	17.6258	240.049	0	222.26	244.574	238.224	287.362	38.8621	57.7857	0	263.275	215.939	245.2	237.049	59.223	97.8551	5.10773	94.6622
TTLL4_c.601A>G_p.I201V	TTLL4_2:218738277_A>G_6	152.382	505.443	0	0	0	0	0	0	0	10.7928	0.795638	9.40241	2.75047	0	4.02296	30.5809	87.1725	48.4711	195.943	0	213.601	184.731	257.173	272.812	25.146	0	0	173.207	273.988	189.154	209.485	40.2716	90.3277	3.06464	76.913
TTLL4_c.601A>G_p.I201V	TTLL4_2:218738277_A>G_2	180.109	272.639	0	0	0	0	33.1059	0	0	1721.44	3.97819	28.2072	9.62665	0	2.3772	15.2904	58.115	46.2679	279.846	0	300.196	257.583	254.466	240.075	25.146	0	0	270.203	287.919	315.257	264.612	71.0676	210.765	8.51288	118.328
TTLL4_c.601A>G_p.I201V	TTLL4_2:218738277_A>G_3	171.954	109.504	0	0	0	0	0	0	0	10.7928	0.795638	9.40241	1.37524	0	0.548585	6.79575	10.8966	15.4226	239.289	0	228.033	260.185	240.931	250.987	43.4341	1560.22	0	256.346	292.563	255.708	261.856	111.339	135.492	6.46979	118.328
TTC3_c.476A>G_p.E159G	TTC3_21:37090282_A>G_6	64.7741	18.2794	0	0	0	0	0	0	0	0	0.795638	9.40241	1.37524	0	0.365723	3.39787	7.26438	0	66.9198	0	51.957	75.4537	75.7984	83.6623	9.14402	0	0	76.2111	76.6236	56.0456	96.4732	33.1649	75.2731	2.04309	76.913
TTC3_c.476A>G_p.E159G	TTC3_21:37090282_A>G_5	67.1041	100.882	0	0	0	0	0	0	0	0	0	28.2072	1.37524	0	1.09717	8.49469	18.1609	22.0323	85.0016	0	89.4814	117.083	108.283	61.8374	29.7181	0	0	90.0676	83.5894	94.577	74.4222	33.1649	45.1639	4.4267	70.9966
TTC3_c.476A>G_p.E159G	TTC3_21:37090282_A>G_2	65.2401	116.747	0	0	0	0	0	0	0	5.39638	0	0	1.37524	0	0.365723	10.1936	21.7931	13.2194	57.3719	0	57.73	72.8518	64.9701	98.2123	4.57201	0	0	41.5697	58.0482	73.5599	74.4222	23.6892	52.6912	1.70258	23.6655
TTC3_c.476A>G_p.E159G	TTC3_21:37090282_A>G_4	86.2101	345.24	0	0	0	0	0	0	0	5.39638	0.795638	18.8048	0	0	1.82862	10.1936	47.2184	35.2517	63.9625	0	75.0489	72.8518	97.4551	167.325	22.86	0	0	72.7469	71.9798	63.0513	77.1786	56.8541	30.1092	4.08618	65.0802
TTC3_c.476A>G_p.E159G	TTC3_21:37090282_A>G_3	70.1331	401.113	0	0	0	0	0	0	0	0	1.59128	9.40241	0	0	2.74292	32.2798	43.5863	92.5357	77.8196	0	77.9354	72.8518	92.0409	116.4	16.002	0	0	86.6035	95.1991	91.0741	63.3967	33.1649	60.2185	2.72412	47.3311
TRIM63_c.766T>C_p.S256P	TRIM63_1:26058455_T>C_4	102.986	252.98	0	0	0	0	0	0	0	0	1.59128	9.40241	0	0	496.652	74.7532	163.448	125.584	106.97	0	150.098	104.074	108.283	112.762	20.574	0	0	135.101	148.603	119.097	151.601	28.427	75.2731	2.38361	76.913
TRIM63_c.766T>C_p.S256P	TRIM63_1:26058455_T>C_2	87.3751	142.614	0	0	0	0	0	0	0	10.7928	0	0	0	0	0.548585	11.8926	7.26438	15.4226	111.702	0	83.7084	80.6574	113.698	112.762	22.86	0	0	180.135	118.418	126.103	121.281	16.5824	90.3277	1.70258	23.6655
TRIM63_c.766T>C_p.S256P	TRIM63_1:26058455_T>C_6	101.122	152.099	0	0	0	0	0	0	0	5.39638	0	0	1.37524	0	1.09717	8.49469	14.5288	26.4388	131.896	0	170.303	145.704	154.304	105.487	54.8641	0	0	155.886	143.96	101.583	206.728	56.8541	82.8004	4.08618	94.6622
TRIM63_c.766T>C_p.S256P	TRIM63_1:26058455_T>C_3	126.985	69.1514	0	0	0	0	0	0	0	0	1.59128	9.40241	0	0	0	1.69894	0	2.20323	130.375	0	118.346	143.102	110.991	112.762	38.8621	0	0	138.566	141.638	112.091	129.55	49.7473	82.8004	4.4267	53.2475
TRIM63_c.766T>C_p.S256P	TRIM63_1:26058455_T>C_5	81.5501	83.8094	0	0	0	0	0	0	0	5.39638	1.59128	9.40241	1.37524	0	0.914308	10.1936	18.1609	11.0162	86.438	0	109.687	85.8611	124.526	105.487	20.574	0	0	69.2828	90.5552	59.5485	68.9095	26.0581	45.1639	2.38361	70.9966
TRIM48_c.574T>C_p.Y192H	TRIM48_11:55268368_T>C_6	64.3081	226.596	0	0	0	0	0	0	0	10.7928	0.795638	0	0	0	0.365723	5.09681	14.5288	8.81292	55.851	0	54.8435	59.8426	48.7275	80.0248	9.14402	0	0	58.8904	81.2675	84.0684	60.6403	11.8446	60.2185	2.04309	17.7492
TRIM48_c.574T>C_p.Y192H	TRIM48_11:55268368_T>C_2	58.0171	393.87	0	0	0	0	0	0	0	0	1.59128	0	0	0	3.10865	30.5809	50.8506	33.0485	49.4294	0	51.957	57.2407	62.263	90.9373	13.716	0	0	45.0338	55.7263	63.0513	57.8839	18.9514	15.0546	0.68103	41.4147
TRIM48_c.574T>C_p.Y192H	TRIM48_11:55268368_T>C_3	53.5901	54.6658	0	0	0	0	0	0	0	0	0	0	1.37524	0	0.365723	3.39787	14.5288	4.40646	70.0461	0	57.73	83.2592	86.6267	72.7499	16.002	0	0	76.2111	53.4044	80.5656	85.4477	21.3203	22.5819	2.38361	35.4983
TRIM48_c.574T>C_p.Y192H	TRIM48_11:55268368_T>C_5	44.9691	73.635	0	0	0	0	0	0	0	0	0	0	0	0	1.09717	10.1936	10.8966	11.0162	85.8466	0	118.346	72.8518	89.3338	69.1124	32.0041	0	0	114.317	60.3701	105.086	101.986	144.504	45.1639	4.76721	53.2475
TRIM48_c.574T>C_p.Y192H	TRIM48_11:55268368_T>C_4	62.6771	102.434	0	0	0	0	0	0	0	5.39638	1.59128	9.40241	0	0	0.548585	6.79575	29.0575	6.60969	87.114	0	98.1409	80.6574	70.3842	47.2874	9.14402	0	0	72.7469	83.5894	59.5485	82.6913	40.2716	52.6912	1.70258	65.0802
TRIM48_c.131T>C_p.I44T	TRIM48_11:55264986_T>C_2	88.7732	76.0493	0	0	0	0	0	0	0	0	0.795638	28.2072	0	0	0.914308	6.79575	7.26438	15.4226	114.237	0	103.914	153.509	81.2126	109.125	25.146	0	0	124.709	109.131	126.103	126.793	42.6406	60.2185	5.10773	94.6622
TRIM48_c.131T>C_p.I44T	TRIM48_11:55264986_T>C_5	95.2972	128.991	0	0	0	0	0	0	0	0	0	28.2072	1.37524	0	0.365723	8.49469	14.5288	17.6258	117.363	0	187.622	130.093	135.354	138.225	27.432	0	0	159.35	130.028	108.588	124.037	40.2716	67.7458	3.40515	65.0802
TRIM48_c.131T>C_p.I44T	TRIM48_11:55264986_T>C_6	51.7261	6.20811	0	0	0	0	0	0	0	0	0	28.2072	0	0	0	0	3.63219	0	99.0277	0	86.5949	83.2592	108.283	32.7374	16.002	0	0	86.6035	90.5552	80.5656	99.2296	42.6406	37.6366	2.38361	29.5819
TRIM48_c.131T>C_p.I44T	TRIM48_11:55264986_T>C_3	91.8022	124.679	0	0	0	0	0	0	0	0	0.795638	0	0	0	1.46289	10.1936	29.0575	11.0162	122.686	0	86.5949	91.0648	100.162	127.312	22.86	0	0	131.637	116.096	129.605	124.037	18.9514	52.6912	3.40515	23.6655
TRIM48_c.131T>C_p.I44T	TRIM48_11:55264986_T>C_4	74.5601	95.0185	0	0	0	0	0	0	0	5.39638	0.795638	0	1.37524	0	0.182862	5.09681	21.7931	13.2194	54.5835	0	46.184	65.0463	62.263	98.2123	6.85801	0	0	48.4979	71.9798	70.057	71.6658	30.796	52.6912	3.06464	35.4983
TRIM11_c.67T>C_p.F23L	TRIM11_1:228406495_T>C_2	84.1131	99.1573	0	0	0	0	0	0	0	10.7928	0	0	2.75047	0	0.914308	1.69894	29.0575	22.0323	116.603	0	124.119	88.4629	105.576	160.05	20.574	57.7857	0	100.46	74.3017	98.0798	137.819	28.427	22.5819	1.70258	23.6655
TRIM11_c.67T>C_p.F23L	TRIM11_1:228406495_T>C_4	68.0361	37.4211	0	0	0	0	0	0	0	0	0.795638	0	0	0	0	1.69894	3.63219	8.81292	79.8474	0	77.9354	83.2592	67.6771	112.762	11.43	0	0	110.852	67.3359	73.5599	60.6403	45.0095	60.2185	1.02155	41.4147
TRIM11_c.67T>C_p.F23L	TRIM11_1:228406495_T>C_6	80.3851	274.881	0	0	0	0	0	0	0	5.39638	1.59128	18.8048	1.37524	0	2.56006	27.183	39.9541	39.6582	101.732	0	95.2544	135.296	92.0409	149.137	18.288	0	0	124.709	106.809	122.6	93.7169	45.0095	112.91	4.08618	106.495
TRIM11_c.67T>C_p.F23L	TRIM11_1:228406495_T>C_5	127.451	160.721	0	0	0	0	0	0	0	16.1891	0.795638	18.8048	1.37524	0	0.548585	3.39787	32.6897	22.0323	181.072	0	190.509	158.713	178.668	196.425	22.86	0	0	145.494	155.569	161.131	140.575	47.3784	120.437	5.10773	130.16
TRIM11_c.67T>C_p.F23L	TRIM11_1:228406495_T>C_3	76.1911	124.507	0	0	0	0	0	0	0	0	2.38691	18.8048	0	0	0.731447	13.5915	7.26438	19.8291	97.3378	0	95.2544	93.6666	110.991	123.675	20.574	0	0	100.46	113.774	91.0741	140.575	16.5824	60.2185	3.40515	82.8294
TRAM2_c.799A>G_p.I267V	TRAM2_6:52505675_A>G_4	87.6081	137.268	0	0	0	0	0	0	0	10.7928	0	9.40241	1.37524	0	1.09717	16.9894	7.26438	15.4226	121.081	0	144.325	111.88	154.304	105.487	4.57201	0	0	93.5317	141.638	147.12	124.037	42.6406	52.6912	3.40515	70.9966
TRAM2_c.799A>G_p.I267V	TRAM2_6:52505675_A>G_5	140.732	401.113	0	0	0	0	0	0	0	5.39638	2.38691	18.8048	1.37524	0	2.92579	25.4841	39.9541	26.4388	208.702	0	176.076	197.741	200.324	207.337	18.288	0	0	242.49	185.754	248.702	203.972	59.223	105.382	3.06464	88.7458
TRAM2_c.799A>G_p.I267V	TRAM2_6:52505675_A>G_3	109.277	350.413	0	0	0	0	0	0	0	10.7928	0.795638	18.8048	0	0	3.29151	30.5809	54.4828	39.6582	111.786	0	129.892	122.287	89.3338	141.862	27.432	57.7857	0	142.03	139.316	119.097	129.55	52.1162	60.2185	0.68103	88.7458
TRAM2_c.799A>G_p.I267V	TRAM2_6:52505675_A>G_6	159.139	479.059	0	0	0	0	66.2119	12.4517	0	5.39638	0.795638	0	1.37524	0	15132.7	2147.46	4489.38	3842.44	216.898	0	204.941	202.944	219.274	210.975	32.0041	0	0	242.49	227.549	238.194	195.703	75.8054	105.382	5.10773	47.3311
TRAM2_c.799A>G_p.I267V	TRAM2_6:52505675_A>G_2	119.529	360.76	0	0	0	0	0	0	0	10.7928	1.59128	9.40241	0	0	2.19434	27.183	76.2759	50.6743	140.853	0	109.687	111.88	129.94	167.325	18.288	0	0	131.637	127.706	126.103	132.306	35.5338	82.8004	1.36206	47.3311
TPMT_c.719A>G_p.Y240C	TPMT_6:18130687_A>G_5	50.5611	154.513	0	0	0	0	0	0	0	0	0	0	0	0	0.365723	3.39787	3.63219	19.8291	46.81	0	43.2975	83.2592	37.8992	61.8374	11.43	0	0	58.8904	71.9798	77.0627	74.4222	26.0581	15.0546	1.36206	17.7492
TPMT_c.719A>G_p.Y240C	TPMT_6:18130687_A>G_4	41.4741	33.7997	0	0	0	0	0	0	0	16.1891	0	0	0	0	0.182862	0	0	0	53.7386	0	77.9354	57.2407	75.7984	130.95	16.002	0	0	45.0338	44.1166	77.0627	60.6403	26.0581	45.1639	1.02155	29.5819
TPMT_c.719A>G_p.Y240C	TPMT_6:18130687_A>G_2	59.8811	97.4328	0	0	0	0	0	0	0	0	0	0	0	0	1.09717	6.79575	14.5288	13.2194	84.1567	0	103.914	93.6666	81.2126	120.037	29.7181	0	0	72.7469	69.6578	63.0513	71.6658	23.6892	45.1639	2.38361	53.2475
TPMT_c.719A>G_p.Y240C	TPMT_6:18130687_A>G_6	49.3961	6.03566	0	0	0	0	0	0	0	0	0	18.8048	0	0	0	0	0	0	56.8649	0	77.9354	54.6389	40.6063	123.675	20.574	0	0	72.7469	90.5552	108.588	71.6658	26.0581	60.2185	1.36206	35.4983
TPMT_c.719A>G_p.Y240C	TPMT_6:18130687_A>G_3	38.2121	209.696	0	0	0	0	0	0	0	0	2.38691	0	0	0	1.82862	13.5915	29.0575	35.2517	46.3031	0	49.0705	33.8241	29.7779	36.3749	4.57201	0	0	24.249	53.4044	66.5542	35.8329	21.3203	0	1.36206	11.8328
TP53_c.854A>G_p.E285G	TP53_17:7673766_A>G_3	44.2701	123.817	0	0	0	0	0	0	0	0	0	0	0	0	0.182862	10.1936	29.0575	19.8291	166.539	0	161.644	132.694	143.476	58.1999	25.146	0	0	155.886	157.891	168.137	143.332	33.1649	60.2185	4.4267	82.8294
TP53_c.854A>G_p.E285G	TP53_17:7673766_A>G_2	94.1322	419.565	0	0	0	0	0	0	0	16.1891	1.59128	0	0	0	4.20582	28.8819	76.2759	55.0808	137.388	0	144.325	145.704	86.6267	120.037	32.0041	0	0	148.958	132.35	147.12	146.088	59.223	82.8004	6.46979	65.0802
TP53_c.854A>G_p.E285G	TP53_17:7673766_A>G_5	102.054	791.016	0	0	0	0	33.1059	0	0	10.7928	0.795638	0	0	0	8.77736	73.0543	177.977	154.226	171.862	0	167.417	166.518	157.011	181.875	27.432	57.7857	0	173.207	120.74	164.634	143.332	40.2716	127.964	6.46979	88.7458
TP53_c.854A>G_p.E285G	TP53_17:7673766_A>G_6	103.219	91.5696	0	0	0	0	0	0	0	5.39638	2.38691	0	1.37524	0	1.09717	11.8926	3.63219	8.81292	186.48	0	147.211	140.5	189.496	141.862	22.86	0	0	152.422	190.398	168.137	143.332	49.7473	52.6912	4.08618	76.913
TP53_c.854A>G_p.E285G	TP53_17:7673766_A>G_4	92.5012	84.4992	0	0	0	0	0	0	0	0	1.59128	0	2.75047	0	0.548585	8.49469	14.5288	11.0162	172.031	0	170.303	200.343	208.446	112.762	36.5761	0	0	162.815	195.042	157.628	162.626	59.223	60.2185	5.10773	76.913
TP53_c.823T>C	TP53_17:7673797_T>C_2	310.124	362.14	0	0	0	0	0	0	0	32.3783	3.97819	18.8048	1.37524	0	3.47437	28.8819	54.4828	41.8614	541.104	0	479.159	515.167	481.861	371.024	84.5822	57.7857	0	575.047	475.995	511.416	526.468	149.242	203.237	11.5775	283.986
TP53_c.823T>C	TP53_17:7673797_T>C_3	385.616	1183.85	0	0	0	0	0	0	0	26.9819	3.18255	94.0241	9.62665	0	8.41163	101.936	181.609	158.633	541.104	0	597.505	671.278	644.286	636.561	77.7241	1213.5	0	689.364	678.003	584.976	529.225	1115.76	210.765	16.0042	301.736
TP53_c.823T>C	TP53_17:7673797_T>C_4	339.249	340.411	0	0	0	0	0	0	0	10.7928	3.97819	56.4145	4.12571	0	3.84009	37.3766	69.0116	48.4711	576.676	0	689.873	725.916	682.186	683.849	150.876	0	0	703.22	678.003	598.987	595.378	1196.3	391.42	15.6637	313.568
TP53_c.823T>C	TP53_17:7673797_T>C_6	220.185	603.911	0	0	0	0	0	0	0	21.5855	181.405	103.427	1.37524	0	4.02296	49.2692	83.5403	88.1292	306.885	0	389.677	408.491	327.557	323.737	66.2941	1329.07	0	387.984	373.83	378.308	396.918	1212.89	218.292	8.51288	118.328
TP53_c.823T>C	TP53_17:7673797_T>C_5	164.498	119.679	0	0	0	0	0	0	0	10.7928	3.18255	0	5.50094	0	2.01148	20.3872	21.7931	41.8614	282.043	0	349.266	335.639	311.315	250.987	57.1501	0	0	336.021	336.68	336.274	372.111	933.354	165.601	7.83185	201.157
TP53_c.821T>C_p.V274A	TP53_17:7673799_T>C_2	125.354	192.624	0	0	0	0	0	0	0	26.9819	1.59128	0	1.37524	0	824.889	134.216	232.46	293.03	197.633	0	320.401	283.602	235.516	320.099	68.5801	0	0	294.452	241.481	287.234	283.907	1160.77	135.492	6.12927	147.91
TP53_c.821T>C_p.V274A	TP53_17:7673799_T>C_3	167.294	354.379	0	0	0	0	33.1059	0	0	10.7928	0.795638	37.6096	0	0	4.38868	49.2692	83.5403	116.771	260.582	0	294.423	286.204	300.486	301.912	54.8641	0	0	301.38	292.563	276.725	294.932	1108.65	195.71	7.15082	147.91
TP53_c.773A>G_p.E258G	TP53_17:7674190_A>G_2	50.0951	21.0386	0	0	0	0	0	0	0	0	0	0	1.37524	0	0	5.09681	0	0	94.127	0	75.0489	41.6296	81.2126	65.4749	9.14402	0	0	107.388	99.8429	45.5371	71.6658	16.5824	22.5819	0.68103	35.4983
TP53_c.773A>G_p.E258G	TP53_17:7674190_A>G_3	90.4042	91.5696	0	0	0	0	0	0	0	10.7928	0	0	2.75047	0	0.548585	13.5915	18.1609	4.40646	122.264	0	109.687	145.704	105.576	61.8374	18.288	0	0	152.422	146.281	108.588	121.281	47.3784	90.3277	3.40515	70.9966
TP53_c.773A>G_p.E258G	TP53_17:7674190_A>G_5	116.267	201.763	0	0	0	0	33.1059	0	0	5.39638	0	9.40241	2.75047	0	1.82862	13.5915	36.3219	19.8291	152.09	0	138.552	150.907	165.132	189.15	41.1481	0	0	169.743	174.145	175.143	165.383	40.2716	90.3277	5.44824	76.913
TP53_c.773A>G_p.E258G	TP53_17:7674190_A>G_6	115.568	137.613	0	0	0	0	0	0	0	5.39638	0	9.40241	1.37524	0	1.46289	11.8926	7.26438	19.8291	168.398	0	164.53	197.741	165.132	141.862	43.4341	0	0	166.279	155.569	178.645	137.819	132.66	112.91	4.76721	153.826
TP53_c.773A>G_p.E258G	TP53_17:7674190_A>G_4	95.0642	70.1861	0	0	0	0	0	0	0	0	0.795638	0	2.75047	0	0.548585	8.49469	50.8506	6.60969	142.205	0	138.552	122.287	151.597	156.412	43.4341	0	0	90.0676	116.096	119.097	143.332	40.2716	67.7458	2.72412	47.3311
TP53_c.755T>C_p.L252P	TP53_17:7674208_T>C_4	73.6281	89.5002	0	0	0	0	0	0	0	0	1.59128	0	0	0	1.28003	16.9894	29.0575	24.2355	130.544	0	106.8	156.111	138.061	105.487	18.288	0	0	131.637	106.809	119.097	135.063	42.6406	37.6366	2.04309	23.6655
TP53_c.755T>C_p.L252P	TP53_17:7674208_T>C_3	82.2491	306.612	0	0	0	0	0	0	0	5.39638	0.795638	28.2072	1.37524	0	1.64575	18.6883	39.9541	48.4711	82.3823	0	66.3895	161.315	135.354	178.237	34.2901	0	0	90.0676	69.6578	87.5713	90.9605	26.0581	52.6912	3.06464	47.3311
TP53_c.755T>C_p.L252P	TP53_17:7674208_T>C_5	126.752	128.473	0	0	0	0	0	0	0	5.39638	1.59128	9.40241	2.75047	0	0.548585	8.49469	18.1609	8.81292	187.325	0	196.282	223.759	194.91	163.687	41.1481	0	0	176.671	206.652	150.623	184.677	68.6987	97.8551	6.8103	106.495
TP53_c.755T>C_p.L252P	TP53_17:7674208_T>C_6	166.828	241.081	0	0	0	0	0	0	0	10.7928	0	9.40241	1.37524	0	1.28003	22.0862	21.7931	15.4226	196.028	0	193.395	166.518	167.839	221.887	50.2921	0	0	228.633	183.432	220.68	201.216	82.9122	127.964	3.40515	118.328
TP53_c.755T>C_p.L252P	TP53_17:7674208_T>C_2	83.1811	99.5022	0	0	0	0	0	0	0	5.39638	1.59128	0	1.37524	0	0.914308	10.1936	14.5288	11.0162	100.126	0	121.233	106.676	100.162	109.125	20.574	0	0	90.0676	127.706	91.0741	124.037	82.9122	60.2185	3.40515	94.6622
TP53_c.745A>G_p.R249G	TP53_17:7674218_A>G_3	97.3942	142.097	0	0	0	0	0	0	22.2162	5.39638	0	9.40241	0	0	147.569	50.9681	54.4828	55.0808	254.16	0	225.147	205.546	200.324	87.2998	29.7181	0	0	259.81	208.974	255.708	281.151	75.8054	82.8004	4.76721	70.9966
TP53_c.745A>G_p.R249G	TP53_17:7674218_A>G_6	144.693	455.606	0	0	0	0	0	0	0	21.5855	0.795638	18.8048	4.12571	0	2.92579	27.183	43.5863	48.4711	210.392	0	300.196	247.176	197.617	287.362	34.2901	0	0	245.954	260.056	227.685	278.394	1021	188.183	8.17236	130.16
TP53_c.745A>G_p.R249G	TP53_17:7674218_A>G_5	194.322	131.922	0	0	19.7843	0	0	0	0	21.5855	0	18.8048	2.75047	174.224	1.09717	6.79575	25.4253	13.2194	242.162	0	282.877	338.241	303.194	374.662	84.5822	0	0	287.524	332.036	269.72	242.561	578.016	135.492	7.15082	100.579
TP53_c.745A>G_p.R249G	TP53_17:7674218_A>G_2	162.168	143.304	0	0	0	0	0	0	0	10.7928	0.795638	9.40241	2.75047	0	1.09717	8.49469	18.1609	6.60969	223.319	0	196.282	208.148	216.567	225.525	54.8641	0	0	259.81	220.583	192.657	209.485	61.5919	127.964	5.10773	100.579
TP53_c.745A>G_p.R249G	TP53_17:7674218_A>G_4	163.799	153.478	0	0	0	0	0	0	0	16.1891	0.795638	18.8048	0	0	9322.1	1267.41	2586.12	2227.47	183.1	0	222.26	197.741	100.162	203.7	36.5761	57.7857	0	232.097	236.837	206.668	181.921	54.4852	97.8551	4.76721	94.6622
TP53_c.740A>G_p.N247S	TP53_17:7674223_A>G_5	243.019	564.076	0	0	0	0	0	0	0	10.7928	3.97819	28.2072	4.12571	0	3.65723	49.2692	87.1725	63.8937	304.181	0	279.99	317.426	254.466	381.937	36.5761	0	0	270.203	264.7	315.257	250.83	63.9608	120.437	5.44824	112.411
TP53_c.740A>G_p.N247S	TP53_17:7674223_A>G_2	146.557	116.574	0	0	0	0	0	0	0	16.1891	1.59128	47.0121	4.12571	0	0.365723	5.09681	7.26438	19.8291	175.495	0	239.579	182.13	213.86	258.262	43.4341	0	0	259.81	229.871	210.171	245.318	1186.83	97.8551	5.10773	118.328
TP53_c.740A>G_p.N247S	TP53_17:7674223_A>G_3	181.041	128.818	0	0	0	0	297.953	0	0	16.1891	0	0	0	0	1.46289	16.9894	29.0575	22.0323	275.03	0	409.883	361.657	300.486	214.612	82.2961	0	0	363.735	308.816	350.285	325.253	1319.49	127.964	9.53442	130.16
TP53_c.740A>G_p.N247S	TP53_17:7674223_A>G_4	174.051	156.755	0	0	0	0	0	0	0	10.7928	0	0	0	0	1.82862	28.8819	72.6438	37.4549	252.386	0	320.401	320.028	335.679	312.824	66.2941	0	0	311.772	299.529	304.748	261.856	1672.46	90.3277	7.15082	70.9966
TP53_c.740A>G_p.N247S	TP53_17:7674223_A>G_6	292.182	271.605	0	0	0	0	33.1059	0	0	37.7746	2.38691	37.6096	2.75047	0	0.914308	39.0756	50.8506	63.8937	386.563	0	372.358	366.861	438.548	305.549	66.2941	0	0	367.199	385.44	395.822	369.355	130.291	233.347	11.237	236.655
TP53_c.737T>C_p.M246T	TP53_17:7674226_T>C_3	180.575	279.537	0	0	0	0	0	0	0	16.1891	3.18255	9.40241	0	0	3.84009	27.183	61.7472	55.0808	274.861	0	383.904	400.685	297.779	421.949	61.7221	0	0	367.199	376.152	360.794	372.111	1362.13	188.183	10.556	171.575
TP53_c.737T>C_p.M246T	TP53_17:7674226_T>C_6	183.138	839.991	0	0	0	0	0	0	0	0	2.38691	18.8048	4.12571	0	4.02296	42.4734	76.2759	70.5034	223.319	0	242.466	228.963	189.496	269.174	57.1501	57.7857	0	232.097	204.33	245.2	212.241	61.5919	112.91	3.74567	147.91
TP53_c.737T>C_p.M246T	TP53_17:7674226_T>C_4	85.0451	98.1226	0	0	0	0	0	0	0	10.7928	0.795638	9.40241	1.37524	0	4.38868	1.69894	21.7931	8.81292	181.072	0	222.26	213.352	181.375	83.6623	36.5761	0	0	166.279	183.432	178.645	135.063	111.339	120.437	3.74567	118.328
TP53_c.737T>C_p.M246T	TP53_17:7674226_T>C_2	157.741	119.851	0	0	0	0	0	0	0	21.5855	3.18255	56.4145	5.50094	0	2.56006	15.2904	32.6897	37.4549	294.971	0	479.159	408.491	414.184	432.862	75.4381	2195.86	0	415.697	376.152	388.816	468.584	3072.49	225.819	7.83185	254.405
TP53_c.737T>C_p.M246T	TP53_17:7674226_T>C_5	129.781	126.576	0	0	0	0	0	0	0	16.1891	0.795638	9.40241	1.37524	0	0.731447	5.09681	3.63219	8.81292	227.798	0	199.168	202.944	254.466	167.325	34.2901	0	0	225.169	176.467	238.194	226.023	71.0676	150.546	4.08618	118.328
TP53_c.736A>G_p.M246V	TP53_17:7674227_A>G_5	109.277	208.834	0	0	0	0	0	0	0	5.39638	0.795638	9.40241	5.50094	0	1.82862	16.9894	21.7931	33.0485	147.19	0	150.098	140.5	113.698	225.525	41.1481	0	0	183.599	120.74	154.125	154.357	54.4852	45.1639	3.74567	106.495
TP53_c.736A>G_p.M246V	TP53_17:7674227_A>G_3	126.519	251.946	0	0	0	0	0	0	0	0	0	18.8048	0	0	1.28003	23.7851	21.7931	26.4388	127.164	0	167.417	130.093	129.94	90.9373	20.574	0	0	83.1393	136.994	136.611	115.768	33.1649	30.1092	4.4267	47.3311
TP53_c.736A>G_p.M246V	TP53_17:7674227_A>G_4	137.47	106.917	0	0	0	0	0	0	0	0	1.59128	9.40241	1.37524	0	0	10.1936	7.26438	6.60969	187.409	0	158.757	179.528	159.718	167.325	45.7201	0	0	152.422	150.925	175.143	179.165	26.0581	52.6912	2.72412	35.4983
TP53_c.736A>G_p.M246V	TP53_17:7674227_A>G_6	111.84	243.668	0	0	0	0	0	0	0	5.39638	0.795638	9.40241	1.37524	0	1.46289	15.2904	29.0575	39.6582	136.797	0	124.119	163.917	146.183	127.312	34.2901	0	0	69.2828	153.247	108.588	146.088	49.7473	90.3277	3.06464	65.0802
TP53_c.725A>G_p.D242G	TP53_17:7673778_A>G_2	85.2781	211.421	0	0	0	0	0	0	0	0	0.795638	0	0	0	1.28003	11.8926	29.0575	35.2517	177.946	0	274.217	169.12	221.981	138.225	29.7181	0	0	228.633	192.72	178.645	201.216	537.745	82.8004	3.74567	70.9966
TP53_c.725A>G_p.D242G	TP53_17:7673778_A>G_6	191.06	572.181	0	0	0	0	0	0	0	5.39638	0.795638	37.6096	1.37524	0	3.47437	47.5702	58.115	68.3002	283.902	0	317.515	283.602	235.516	352.837	70.8661	0	0	311.772	246.124	315.257	278.394	108.97	195.71	8.85339	141.993
TP53_c.725A>G_p.D242G	TP53_17:7673778_A>G_4	100.889	98.4675	0	0	0	0	0	12.4517	0	5.39638	0	28.2072	0	0	1.46289	20.3872	32.6897	15.4226	238.021	0	271.331	241.972	251.759	192.787	61.7221	0	0	239.026	255.412	287.234	316.984	1182.09	112.91	8.17236	124.244
TP53_c.725A>G_p.D242G	TP53_17:7673778_A>G_3	42.4061	9.31216	0	0	0	0	0	0	0	5.39638	0.795638	18.8048	1.37524	0	0.365723	1.69894	3.63219	8.81292	130.206	0	178.963	132.694	146.183	112.762	25.146	0	0	207.848	174.145	164.634	234.292	731.996	90.3277	1.70258	65.0802
TP53_c.725A>G_p.D242G	TP53_17:7673778_A>G_5	76.1911	106.4	0	0	0	0	0	0	0	0	0.795638	0	0	0	0.548585	5.09681	10.8966	6.60969	187.071	0	196.282	148.306	175.961	112.762	34.2901	0	0	187.063	181.11	157.628	195.703	26.0581	75.2731	3.74567	88.7458
TP53_c.721A>G	TP53_17:7673782_A>G_4	165.896	141.234	0	0	0	0	0	0	0	0	1.59128	0	1.37524	0	1081.26	156.302	377.748	273.201	298.773	0	271.331	288.805	268.001	192.787	57.1501	0	0	249.418	264.7	304.748	292.176	68.6987	112.91	7.15082	112.411
TP53_c.721A>G	TP53_17:7673782_A>G_5	157.974	299.541	0	0	0	0	33.1059	0	0	10.7928	2.38691	0	2.75047	0	1.28003	30.5809	36.3219	15.4226	215.63	0	161.644	163.917	251.759	240.075	29.7181	57.7857	0	200.92	204.33	210.171	143.332	35.5338	105.382	4.76721	94.6622
TP53_c.721A>G	TP53_17:7673782_A>G_3	54.2891	219.87	0	0	0	0	0	0	0	0	0.795638	0	0	0	18.469	23.7851	61.7472	26.4388	120.067	0	147.211	132.694	116.405	69.1124	38.8621	0	0	245.954	127.706	157.628	159.87	42.6406	165.601	4.08618	59.1639
TP53_c.721A>G	TP53_17:7673782_A>G_6	103.685	98.1226	0	0	0	0	0	0	0	0	0.795638	18.8048	0	0	0.914308	6.79575	21.7931	6.60969	158.765	0	132.779	171.722	143.476	145.5	20.574	0	0	173.207	148.603	119.097	148.844	28.427	82.8004	4.76721	47.3311
TP53_c.712T>C_p.C238R	TP53_17:7674251_T>C_3	95.7632	137.268	0	0	0	0	0	0	0	21.5855	2.38691	9.40241	2.75047	0	0.731447	15.2904	25.4253	35.2517	178.03	0	239.579	267.991	230.102	272.812	66.2941	0	0	225.169	285.597	322.262	275.638	2027.8	143.019	7.83185	130.16
TP53_c.712T>C_p.C238R	TP53_17:7674251_T>C_2	111.141	61.7362	0	0	0	0	0	0	0	16.1891	0.795638	0	1.37524	0	1.09717	11.8926	29.0575	11.0162	169.75	0	202.055	153.509	165.132	210.975	22.86	0	0	138.566	150.925	171.64	173.652	855.18	82.8004	3.74567	53.2475
TP53_c.712T>C_p.C238R	TP53_17:7674251_T>C_5	63.8421	43.2843	0	0	0	0	0	0	0	5.39638	0	9.40241	1.37524	0	0.731447	8.49469	7.26438	6.60969	116.349	0	164.53	174.324	178.668	185.512	27.432	0	0	183.599	157.891	147.12	272.881	1511.37	75.2731	6.46979	100.579
TP53_c.712T>C_p.C238R	TP53_17:7674251_T>C_6	91.8022	125.542	0	0	0	0	0	0	0	10.7928	0.795638	18.8048	1.37524	0	3.10865	8.49469	43.5863	19.8291	175.749	0	170.303	213.352	219.274	258.262	41.1481	0	0	218.241	243.802	245.2	214.998	715.414	158.074	3.74567	165.659
TP53_c.712T>C_p.C238R	TP53_17:7674251_T>C_4	119.529	111.401	0	0	0	0	0	0	0	10.7928	3.18255	18.8048	0	0	0.731447	11.8926	14.5288	26.4388	160.455	0	245.352	312.222	208.446	349.199	84.5822	0	0	301.38	280.953	255.708	256.343	2231.52	195.71	12.5991	153.826
TP53_c.707A>G	TP53_17:7674256_A>G_4	108.811	259.878	0	0	0	0	0	0	0	5.39638	0.795638	9.40241	1.37524	0	0.914308	18.6883	47.2184	22.0323	134.769	0	124.119	158.713	124.526	261.899	22.86	0	0	114.317	148.603	129.605	126.793	47.3784	60.2185	4.76721	70.9966
TP53_c.707A>G	TP53_17:7674256_A>G_5	151.683	140.2	0	0	0	0	0	0	0	5.39638	3.18255	9.40241	2.75047	0	0.731447	8.49469	25.4253	17.6258	253.399	0	300.196	283.602	257.173	185.512	29.7181	0	0	249.418	271.666	178.645	278.394	130.291	105.382	7.49133	94.6622
TP53_c.707A>G	TP53_17:7674256_A>G_2	147.955	149.339	0	0	0	0	0	0	0	21.5855	0.795638	9.40241	2.75047	0	1.28003	10.1936	3.63219	11.0162	200.59	0	158.757	189.935	175.961	196.425	38.8621	0	0	162.815	188.076	175.143	253.587	49.7473	120.437	5.10773	124.244
TP53_c.707A>G	TP53_17:7674256_A>G_6	102.52	100.882	0	0	0	0	0	0	0	0	0.795638	0	0	0	1.46289	3.39787	7.26438	19.8291	194.676	0	193.395	163.917	178.668	130.95	36.5761	0	0	190.528	195.042	161.131	206.728	42.6406	112.91	4.08618	65.0802
TP53_c.707A>G	TP53_17:7674256_A>G_3	119.995	266.086	0	0	0	0	0	0	0	26.9819	0.795638	18.8048	0	0	1.09717	1.69894	21.7931	19.8291	160.793	0	173.19	140.5	151.597	156.412	29.7181	0	0	145.494	153.247	136.611	129.55	35.5338	75.2731	4.76721	76.913
TP53_c.701A>G	TP53_17:7674262_A>G_5	106.714	368.52	0	0	0	0	0	0	0	0	0	0	0	0	1.64575	22.0862	58.115	30.8452	287.451	0	279.99	254.981	249.052	134.587	38.8621	0	0	342.95	304.173	301.245	305.958	68.6987	143.019	7.15082	118.328
TP53_c.701A>G	TP53_17:7674262_A>G_4	117.898	46.2159	0	0	0	0	0	0	0	10.7928	2.38691	9.40241	2.75047	0	0	1.69894	3.63219	2.20323	226.784	0	216.487	189.935	178.668	156.412	43.4341	0	0	225.169	190.398	178.645	181.921	68.6987	127.964	3.40515	88.7458
TP53_c.701A>G	TP53_17:7674262_A>G_3	122.325	260.568	0	0	0	0	33.1059	0	0	5.39638	3.18255	0	0	0	1.82862	18.6883	36.3219	44.0646	136.712	0	121.233	111.88	181.375	160.05	29.7181	0	0	187.063	118.418	80.5656	146.088	49.7473	52.6912	5.10773	65.0802
TP53_c.701A>G	TP53_17:7674262_A>G_6	112.772	204.005	0	0	0	0	0	0	0	0	2.38691	37.6096	0	0	1.09717	8.49469	25.4253	15.4226	214.701	0	216.487	247.176	181.375	178.237	41.1481	0	0	221.705	236.837	273.222	259.1	73.4365	105.382	8.17236	88.7458
TP53_c.701A>G	TP53_17:7674262_A>G_2	126.053	1529.26	0	0	0	0	0	0	0	5.39638	0	9.40241	1.37524	0	7.49733	69.6564	177.977	149.82	147.866	0	150.098	156.111	116.405	258.262	34.2901	0	0	169.743	174.145	171.64	137.819	30.796	67.7458	5.10773	41.4147
TP53_c.659A>G	TP53_17:7674872_A>G_3	57.3181	74.3248	0	0	0	0	0	0	0	5.39638	0.795638	9.40241	0	0	0	18.6883	3.63219	8.81292	151.837	0	124.119	119.685	119.112	105.487	18.288	0	0	183.599	113.774	98.0798	121.281	40.2716	82.8004	2.38361	53.2475
TP53_c.659A>G	TP53_17:7674872_A>G_6	194.555	346.964	0	0	0	0	0	0	0	5.39638	0	28.2072	1.37524	0	2.92579	27.183	39.9541	41.8614	272.157	0	326.174	241.972	268.001	261.899	54.8641	0	0	256.346	313.46	280.228	245.318	54.4852	127.964	6.46979	130.16
TP53_c.659A>G	TP53_17:7674872_A>G_2	109.51	44.319	0	0	0	0	0	0	0	0	0.795638	9.40241	2.75047	0	0.548585	3.39787	3.63219	4.40646	165.103	0	196.282	192.537	173.253	203.7	2009.4	0	0	162.815	183.432	203.165	217.754	3292.8	5856.25	21115	5360.25
TP53_c.659A>G	TP53_17:7674872_A>G_4	76.6571	18.6243	0	0	0	0	0	12.4517	0	0	0	9.40241	1.37524	0	0.365723	3.39787	7.26438	0	154.879	0	135.665	104.074	110.991	120.037	27.432	0	0	131.637	134.672	119.097	151.601	28.427	82.8004	2.04309	59.1639
TP53_c.659A>G	TP53_17:7674872_A>G_5	86.6761	33.1099	0	0	0	0	33.1059	684.844	0	0	1.59128	9.40241	0	0	0.365723	5.09681	0	17.6258	141.36	112.485	176.076	132.694	102.869	105.487	25.146	0	0	173.207	153.247	164.634	140.575	56.8541	75.2731	4.4267	94.6622
TP53_c.643A>G_p.S215G	TP53_17:7674888_A>G_4	282.629	461.469	0	0	0	0	0	0	0	10.7928	3.97819	37.6096	4.12571	0	3.84009	32.2798	39.9541	94.7389	367.129	0	279.99	385.074	425.012	440.137	80.0101	0	0	339.486	325.07	332.771	380.38	113.708	225.819	8.17236	171.575
TP53_c.643A>G_p.S215G	TP53_17:7674888_A>G_2	111.84	126.232	0	0	0	0	0	0	0	0	4.77383	9.40241	0	0	0.731447	10.1936	21.7931	6.60969	123.785	0	144.325	174.324	151.597	152.775	25.146	0	0	124.709	102.165	126.103	132.306	47.3784	67.7458	2.72412	65.0802
TP53_c.643A>G_p.S215G	TP53_17:7674888_A>G_6	259.562	443.88	0	0	0	0	0	0	0	32.3783	0.795638	28.2072	2.75047	0	2.01148	39.0756	47.2184	33.0485	417.911	0	352.153	385.074	430.427	392.849	54.8641	57.7857	0	405.304	417.947	402.828	374.867	82.9122	143.019	8.17236	94.6622
TP53_c.643A>G_p.S215G	TP53_17:7674888_A>G_3	111.607	79.6707	0	0	0	0	0	0	0	5.39638	0.795638	0	1.37524	0	0.731447	15.2904	21.7931	15.4226	152.428	0	164.53	187.333	157.011	160.05	34.2901	0	0	183.599	134.672	129.605	140.575	68.6987	112.91	6.12927	65.0802
TP53_c.643A>G_p.S215G	TP53_17:7674888_A>G_5	289.386	680.305	0	0	0	0	33.1059	0	0	32.3783	3.97819	18.8048	4.12571	0	5.85157	50.9681	98.0691	92.5357	302.237	0	274.217	296.611	311.315	323.737	86.8682	57.7857	0	318.701	329.714	287.234	336.278	111.339	240.874	9.87494	130.16
TP53_c.641A>G	TP53_17:7674890_A>G_6	86.6761	106.573	0	0	0	0	0	0	0	10.7928	0	9.40241	4.12571	58.0747	1.28003	5.09681	18.1609	22.0323	167.722	0	228.033	179.528	189.496	214.612	38.8621	0	0	200.92	232.193	182.148	212.241	649.084	67.7458	6.12927	94.6622
TP53_c.641A>G	TP53_17:7674890_A>G_5	94.3652	51.9067	0	0	0	0	0	0	0	10.7928	0	0	1.37524	0	0.731447	6.79575	3.63219	6.60969	176.509	0	150.098	189.935	154.304	130.95	32.0041	0	6.08692	204.384	197.364	182.148	170.895	66.3298	82.8004	5.78876	53.2475
TP53_c.614A>G_p.Y205C	TP53_17:7674917_A>G_2	71.9971	289.884	0	0	0	0	33.1059	0	0	5.39638	1.59128	0	0	0	1.64575	27.183	25.4253	57.284	83.7342	0	106.8	106.676	108.283	141.862	9.14402	0	0	86.6035	76.6236	80.5656	71.6658	21.3203	37.6366	2.04309	59.1639
TP53_c.614A>G_p.Y205C	TP53_17:7674917_A>G_4	45.6681	53.1138	0	0	0	0	0	0	0	0	0	0	0	0	0.182862	3.39787	7.26438	11.0162	71.9894	0	80.8219	46.8333	67.6771	72.7499	16.002	0	0	48.4979	67.3359	63.0513	68.9095	75.8054	52.6912	2.72412	17.7492
TP53_c.614A>G_p.Y205C	TP53_17:7674917_A>G_5	40.3091	102.089	0	0	0	0	0	0	0	0	0	9.40241	1.37524	0	0.731447	5.09681	10.8966	17.6258	70.722	0	75.0489	57.2407	75.7984	69.1124	11.43	0	0	55.4262	60.3701	63.0513	63.3967	9.47568	52.6912	2.72412	11.8328
TP53_c.614A>G_p.Y205C	TP53_17:7674917_A>G_6	63.3761	158.307	0	0	0	0	0	0	0	0	0.795638	9.40241	0	0	1.28003	13.5915	50.8506	15.4226	103.083	0	77.9354	114.481	113.698	69.1124	9.14402	0	0	72.7469	139.316	105.086	96.4732	9.47568	15.0546	2.04309	41.4147
TP53_c.614A>G_p.Y205C	TP53_17:7674917_A>G_3	58.2501	77.6013	0	0	0	0	0	0	0	0	0	9.40241	0	0	0	3.39787	7.26438	6.60969	99.5347	0	101.027	93.6666	105.576	123.675	18.288	0	0	96.9959	113.774	98.0798	96.4732	37.9027	52.6912	4.4267	70.9966
TP53_c.583T>C_p.Y195H	TP53_17:7674263_T>C_4	73.6281	9.31216	0	0	0	0	0	0	0	0	0	0	0	0	0.182862	1.69894	3.63219	4.40646	128.347	0	144.325	114.481	132.647	87.2998	41.1481	0	0	148.958	139.316	161.131	154.357	33.1649	75.2731	2.04309	29.5819
TP53_c.583T>C_p.Y195H	TP53_17:7674263_T>C_3	50.5611	11.3815	0	0	0	0	0	0	0	0	0.795638	9.40241	0	0	0.182862	1.69894	0	4.40646	115.673	0	129.892	143.102	143.476	112.762	27.432	0	0	121.245	136.994	112.091	129.55	26.0581	67.7458	2.72412	53.2475
TP53_c.583T>C_p.Y195H	TP53_17:7674263_T>C_2	55.4541	54.1485	0	0	0	0	0	0	0	0	0.795638	9.40241	0	0	0	5.09681	10.8966	8.81292	108.238	0	63.503	130.093	121.819	90.9373	22.86	0	0	55.4262	113.774	136.611	126.793	37.9027	120.437	3.40515	53.2475
TP53_c.583T>C_p.Y195H	TP53_17:7674263_T>C_6	49.1631	1.72447	0	0	0	0	0	0	0	5.39638	0	9.40241	0	0	0.548585	0	3.63219	2.20323	86.438	0	69.276	106.676	110.991	36.3749	13.716	0	0	110.852	58.0482	77.0627	63.3967	16.5824	75.2731	2.38361	35.4983
TP53_c.583T>C_p.Y195H	TP53_17:7674263_T>C_5	45.6681	47.0781	0	0	0	0	33.1059	0	0	0	0.795638	9.40241	0	0	1.46289	3.39787	21.7931	19.8291	78.8335	0	77.9354	96.2685	97.4551	32.7374	34.2901	0	0	86.6035	81.2675	66.5542	90.9605	28.427	82.8004	2.72412	41.4147
TP53_c.578A>G	TP53_17:7674953_A>G_2	89.7052	131.922	0	0	0	0	33.1059	0	0	0	1.59128	18.8048	0	0	0.548585	8.49469	10.8966	2.20323	109.928	337.454	80.8219	91.0648	100.162	105.487	13.716	0	0	110.852	95.1991	91.0741	90.9605	23.6892	45.1639	2.04309	29.5819
TP53_c.578A>G	TP53_17:7674953_A>G_6	121.859	123.99	0	0	0	0	0	0	0	21.5855	3.97819	18.8048	4.12571	0	1.46289	10.1936	47.2184	17.6258	185.973	0	308.855	267.991	235.516	269.174	52.5781	0	0	270.203	250.768	266.217	256.343	1888.03	143.019	7.15082	147.91
TP53_c.578A>G	TP53_17:7674953_A>G_3	80.3851	219.698	0	0	0	0	0	0	0	0	0.795638	0	0	0	2.19434	23.7851	39.9541	22.0323	103.759	0	124.119	111.88	94.748	134.587	16.002	0	0	142.03	146.281	112.091	135.063	525.9	52.6912	2.72412	47.3311
TP53_c.578A>G	TP53_17:7674953_A>G_4	84.3461	52.2516	0	0	0	0	0	0	0	5.39638	0.795638	9.40241	0	0	0	1.69894	7.26438	8.81292	166.201	0	178.963	200.343	200.324	134.587	48.0061	0	0	207.848	229.871	220.68	223.267	1352.65	127.964	5.78876	88.7458
TP53_c.578A>G	TP53_17:7674953_A>G_5	86.6761	46.9057	0	0	0	0	0	0	0	5.39638	0.795638	0	0	0	0.548585	3.39787	29.0575	11.0162	189.099	0	213.601	221.157	235.516	192.787	61.7221	0	0	266.739	267.022	185.651	267.369	1042.32	203.237	8.17236	136.077
TP53_c.536A>G	TP53_17:7675076_A>G_6	190.361	435.085	0	0	0	0	0	0	0	10.7928	4.77383	9.40241	2.75047	0	2.01148	30.5809	61.7472	50.6743	244.866	0	317.515	338.241	273.416	381.937	57.1501	0	0	322.165	313.46	252.205	286.663	1288.69	127.964	7.49133	124.244
TP53_c.536A>G	TP53_17:7675076_A>G_3	154.712	690.307	0	0	0	0	0	0	0	5.39638	1.59128	18.8048	2.75047	0	3.84009	57.7639	90.8047	74.9099	207.857	0	262.671	283.602	262.587	283.724	61.7221	0	0	277.131	290.241	252.205	237.049	878.869	173.128	6.8103	141.993
TP53_c.536A>G	TP53_17:7675076_A>G_4	143.295	127.611	0	0	0	0	0	0	0	10.7928	2.38691	9.40241	4.12571	0	1.64575	10.1936	58.115	33.0485	242.331	0	239.579	254.981	240.931	221.887	29.7181	0	0	256.346	246.124	273.222	267.369	589.861	67.7458	7.49133	165.659
TP53_c.536A>G	TP53_17:7675076_A>G_5	223.447	248.842	0	0	0	0	0	0	0	21.5855	0.795638	28.2072	2.75047	0	1.82862	18.6883	43.5863	39.6582	275.96	0	372.358	296.611	327.557	432.862	57.1501	0	0	315.237	269.344	353.788	361.086	1582.44	158.074	10.8965	165.659
TP53_c.536A>G	TP53_17:7675076_A>G_2	154.479	181.932	0	0	0	0	0	0	0	10.7928	3.18255	9.40241	4.12571	0	2.19434	16.9894	36.3219	22.0323	191.718	0	193.395	179.528	173.253	167.325	22.86	0	0	135.101	192.72	157.628	184.677	47.3784	90.3277	5.78876	100.579
TP53_c.503A>G_p.H168R	TP53_17:7675109_A>G_2	110.675	141.752	0	0	0	0	33.1059	0	0	10.7928	0	9.40241	1.37524	0	0.914308	6.79575	18.1609	2.20323	179.382	0	147.211	156.111	189.496	156.412	29.7181	0	0	211.312	197.364	178.645	173.652	52.1162	90.3277	3.74567	59.1639
TP53_c.503A>G_p.H168R	TP53_17:7675109_A>G_5	101.355	430.256	0	0	0	0	0	0	0	0	1.59128	0	0	0	2.74292	39.0756	72.6438	33.0485	202.449	0	213.601	239.37	194.91	145.5	52.5781	0	0	197.456	218.261	280.228	228.779	45.0095	105.382	6.46979	165.659
TP53_c.503A>G_p.H168R	TP53_17:7675109_A>G_3	117.199	40.87	0	0	0	0	0	0	0	0	0.795638	0	1.37524	58.0747	0	0	7.26438	8.81292	189.69	0	181.849	166.518	251.759	178.237	36.5761	0	0	169.743	190.398	185.651	159.87	49.7473	90.3277	3.40515	82.8294
TP53_c.503A>G_p.H168R	TP53_17:7675109_A>G_4	126.286	32.2477	0	0	0	0	0	0	0	269.819	40.5775	282.072	13617.6	0	0.731447	0	7.26438	8.81292	197.464	0	193.395	187.333	243.638	152.775	59.4361	0	0	159.35	243.802	213.674	234.292	66.3298	127.964	5.44824	147.91
TP53_c.503A>G_p.H168R	TP53_17:7675109_A>G_6	104.617	37.9384	0	0	0	0	0	0	0	10.7928	1.59128	0	0	0	0.365723	1.69894	7.26438	4.40646	186.311	0	178.963	143.102	184.082	123.675	20.574	0	0	232.097	157.891	224.182	168.139	54.4852	60.2185	3.40515	59.1639
TP53_c.488A>G	TP53_17:7675124_A>G_3	135.373	20.1763	0	0	0	0	0	0	0	5.39638	0	9.40241	1.37524	0	0.182862	0	3.63219	2.20323	217.743	0	167.417	223.759	221.981	167.325	38.8621	0	0	200.92	234.515	196.16	209.485	56.8541	97.8551	4.08618	118.328
TP53_c.488A>G	TP53_17:7675124_A>G_4	150.751	464.918	0	0	0	0	0	0	0	21.5855	5.56947	75.2193	1346.36	0	3.29151	23.7851	61.7472	37.4549	204.562	0	164.53	218.555	186.789	196.425	27.432	0	0	162.815	185.754	175.143	192.946	52.1162	90.3277	5.10773	100.579
TP53_c.488A>G	TP53_17:7675124_A>G_6	172.653	226.768	0	0	0	0	0	0	0	0	0.795638	37.6096	2.75047	0	702.189	115.528	261.518	200.494	199.83	0	222.26	195.139	146.183	221.887	16.002	0	0	252.882	190.398	217.177	198.459	56.8541	82.8004	3.74567	94.6622
TP53_c.488A>G	TP53_17:7675124_A>G_2	150.518	136.923	0	0	0	0	33.1059	0	0	16.1891	1.59128	9.40241	4.12571	0	0.182862	15.2904	21.7931	15.4226	249.344	0	251.125	317.426	365.457	312.824	43.4341	0	0	273.667	234.515	294.239	275.638	78.1744	143.019	5.44824	76.913
TP53_c.488A>G	TP53_17:7675124_A>G_5	89.0062	150.202	0	0	0	0	0	0	0	5.39638	0	9.40241	0	0	12.0689	5.09681	14.5288	8.81292	145.922	0	150.098	182.13	170.546	101.85	27.432	57.7857	6.08692	166.279	178.788	129.605	162.626	85.2811	82.8004	4.76721	76.913
TP53_c.487T>C_p.Y163H	TP53_17:7675125_T>C_5	93.6662	127.094	0	0	0	0	0	0	0	5.39638	1.59128	9.40241	1.37524	0	0.914308	8.49469	10.8966	11.0162	144.486	0	135.665	145.704	165.132	112.762	27.432	57.7857	0	148.958	132.35	91.0741	168.139	45.0095	75.2731	3.74567	94.6622
TP53_c.487T>C_p.Y163H	TP53_17:7675125_T>C_2	90.6372	84.1543	0	0	0	0	0	0	0	21.5855	0	0	0	0	1.46289	5.09681	10.8966	15.4226	118.715	0	158.757	145.704	127.233	72.7499	36.5761	0	0	131.637	120.74	133.108	154.357	40.2716	97.8551	1.36206	47.3311
TP53_c.487T>C_p.Y163H	TP53_17:7675125_T>C_6	97.8602	290.057	0	0	0	0	0	0	0	0	2.38691	9.40241	1.37524	0	2.74292	22.0862	47.2184	46.2679	166.539	0	150.098	148.306	175.961	189.15	32.0041	57.7857	0	159.35	190.398	126.103	162.626	52.1162	75.2731	6.46979	94.6622
TP53_c.487T>C_p.Y163H	TP53_17:7675125_T>C_4	153.547	181.587	0	0	0	0	0	0	0	5.39638	0	0	2.75047	0	1.64575	16.9894	21.7931	24.2355	173.637	0	178.963	213.352	167.839	163.687	29.7181	0	0	187.063	162.535	185.651	170.895	87.65	67.7458	5.10773	130.16
TP53_c.487T>C_p.Y163H	TP53_17:7675125_T>C_3	107.18	74.3248	0	0	0	0	0	0	0	2941.02	6.3651	56.4145	4.12571	0	0.182862	3.39787	18.1609	8.81292	167.637	0	141.438	161.315	143.476	160.05	34.2901	0	0	193.992	199.686	168.137	148.844	59.223	127.964	4.08618	112.411
TP53_c.467T>C_p.I156T	TP53_17:7674947_T>C_6	137.47	278.503	0	0	0	0	0	0	0	26.9819	210.844	112.829	4.12571	0	1.64575	18.6883	14.5288	35.2517	149.302	0	138.552	137.898	167.839	210.975	34.2901	0	0	128.173	146.281	122.6	159.87	40.2716	45.1639	3.40515	82.8294
TP53_c.467T>C_p.I156T	TP53_17:7674947_T>C_4	86.9091	138.303	0	0	0	0	0	0	0	5.39638	0	9.40241	1.37524	0	0.548585	11.8926	25.4253	17.6258	147.021	0	161.644	124.889	154.304	72.7499	27.432	0	0	159.35	118.418	115.594	129.55	49.7473	90.3277	3.06464	82.8294
TP53_c.467T>C_p.I156T	TP53_17:7674947_T>C_3	49.8621	41.5598	0	0	0	0	0	0	0	0	0	0	0	0	0.365723	1.69894	0	8.81292	154.625	0	155.871	169.12	146.183	58.1999	36.5761	0	0	135.101	125.384	150.623	162.626	47.3784	60.2185	3.74567	136.077
TP53_c.467T>C_p.I156T	TP53_17:7674947_T>C_5	89.9382	111.746	0	0	0	0	0	0	0	5.39638	2.38691	9.40241	0	0	1.64575	5.09681	32.6897	26.4388	134.093	2024.72	127.006	135.296	148.89	112.762	41.1481	0	0	124.709	146.281	171.64	151.601	45.0095	60.2185	2.38361	136.077
TP53_c.467T>C_p.I156T	TP53_17:7674947_T>C_2	55.4541	66.3923	0	0	0	0	0	0	4.44324	5.39638	0	0	0	0	21235.4	3019.01	6047.59	5741.62	85.7621	0	101.027	65.0463	78.5055	54.5624	20.574	0	0	100.46	71.9798	80.5656	68.9095	21.3203	45.1639	1.36206	35.4983
TP53_c.395A>G_p.K132R	TP53_17:7675217_A>G_5	148.421	398.181	0	0	0	0	0	0	0	5.39638	0.795638	37.6096	0	0	2.92579	13.5915	47.2184	48.4711	180.143	0	170.303	153.509	189.496	236.437	27.432	0	0	169.743	141.638	147.12	168.139	52.1162	90.3277	1.70258	70.9966
TP53_c.395A>G_p.K132R	TP53_17:7675217_A>G_4	167.061	417.668	0	0	0	0	0	0	0	10.7928	3.18255	0	1.37524	0	748.087	130.818	297.839	211.51	242.162	0	181.849	197.741	213.86	323.737	45.7201	0	0	239.026	243.802	241.697	253.587	71.0676	165.601	3.74567	100.579
TP53_c.395A>G_p.K132R	TP53_17:7675217_A>G_3	147.256	346.447	0	0	0	0	0	0	0	26.9819	0.795638	9.40241	2.75047	0	1.64575	6.79575	29.0575	30.8452	188.761	0	173.19	137.898	189.496	192.787	34.2901	0	0	193.992	199.686	178.645	187.434	54.4852	97.8551	2.38361	100.579
TP53_c.395A>G_p.K132R	TP53_17:7675217_A>G_2	140.732	287.815	0	0	0	0	0	0	0	16.1891	1.59128	37.6096	4.12571	0	3.10865	22.0862	39.9541	41.8614	154.71	0	150.098	195.139	175.961	192.787	18.288	0	0	155.886	204.33	178.645	181.921	47.3784	97.8551	1.70258	70.9966
TP53_c.395A>G_p.K132R	TP53_17:7675217_A>G_6	173.585	307.819	0	0	0	0	0	0	0	5.39638	1.59128	37.6096	0	0	7385.6	1089.02	2121.2	1923.42	195.69	0	222.26	208.148	162.425	261.899	57.1501	57.7857	0	214.777	215.939	234.691	228.779	68.6987	173.128	6.46979	130.16
TP53_c.341A>G_p.K114R	TP53_17:7675238_A>G_3	140.033	17.0723	0	0	0	0	0	0	0	0	0.795638	9.40241	1.37524	0	0	0	0	0	224.671	0	236.693	218.555	181.375	160.05	34.2901	0	0	169.743	208.974	185.651	209.485	52.1162	67.7458	4.4267	136.077
TP53_c.341A>G_p.K114R	TP53_17:7675238_A>G_6	93.6662	372.486	0	0	0	0	0	0	0	5.39638	0	0	0	0	2.56006	10.1936	36.3219	46.2679	165.018	0	124.119	135.296	110.991	116.4	18.288	57.7857	0	166.279	125.384	196.16	154.357	45.0095	30.1092	1.70258	65.0802
TP53_c.341A>G_p.K114R	TP53_17:7675238_A>G_5	135.606	127.094	0	0	0	0	0	0	0	21.5855	3.18255	9.40241	4.12571	0	1.28003	5.09681	43.5863	22.0323	220.447	0	245.352	254.981	205.738	130.95	43.4341	0	0	239.026	204.33	245.2	242.561	59.223	105.382	7.83185	88.7458
TP53_c.341A>G_p.K114R	TP53_17:7675238_A>G_2	181.041	240.392	0	0	0	0	0	0	0	0	1.59128	56.4145	5.50094	0	2.56006	20.3872	25.4253	26.4388	313.56	0	291.536	283.602	300.486	276.449	22.86	0	0	308.308	262.378	287.234	314.227	52.1162	173.128	5.44824	159.742
TP53_c.341A>G_p.K114R	TP53_17:7675238_A>G_4	109.976	44.1465	0	0	0	0	33.1059	0	0	0	0	9.40241	0	0	0.548585	6.79575	21.7931	6.60969	208.702	0	213.601	249.778	175.961	167.325	34.2901	0	0	225.169	218.261	178.645	184.677	40.2716	150.546	5.44824	141.993
TOB1_c.209A>G_p.Q70R	TOB1_17:50863809_A>G_5	74.7931	46.7333	0	0	0	0	0	0	0	0	0	0	0	0	0.182862	5.09681	0	4.40646	237.514	0	207.828	189.935	216.567	69.1124	43.4341	0	0	176.671	222.905	234.691	239.805	59.223	120.437	6.46979	106.495
TOB1_c.209A>G_p.Q70R	TOB1_17:50863809_A>G_2	104.617	88.2931	0	0	0	0	0	0	0	5.39638	0	0	0	0	454.777	66.2586	141.655	171.852	189.944	0	158.757	174.324	135.354	105.487	41.1481	0	0	190.528	192.72	185.651	184.677	78.1744	112.91	6.12927	65.0802
TOB1_c.209A>G_p.Q70R	TOB1_17:50863809_A>G_4	100.423	191.589	0	0	0	0	0	0	0	10.7928	2.38691	9.40241	1.37524	0	1.09717	22.0862	36.3219	26.4388	152.935	0	121.233	143.102	148.89	123.675	29.7181	0	0	155.886	153.247	94.577	132.306	40.2716	60.2185	2.04309	53.2475
TOB1_c.209A>G_p.Q70R	TOB1_17:50863809_A>G_3	78.2881	114.333	0	0	0	0	0	0	0	70.1529	1512.51	742.79	5.50094	0	0.365723	8.49469	18.1609	11.0162	128.685	0	109.687	91.0648	159.718	65.4749	25.146	0	0	114.317	113.774	115.594	137.819	85.2811	52.6912	1.70258	35.4983
TOB1_c.209A>G_p.Q70R	TOB1_17:50863809_A>G_6	115.568	358.346	0	0	0	0	0	0	0	5.39638	0.795638	0	1.37524	0	2.19434	20.3872	47.2184	41.8614	223.573	0	199.168	200.343	235.516	138.225	38.8621	0	0	204.384	234.515	217.177	195.703	78.1744	97.8551	3.74567	112.411
TMEM225B_c.74A>G_p.Y25C	TMEM225B_7:99604462_A>G_6	103.685	704.275	0	0	0	0	33.1059	0	0	21.5855	1.59128	0	1.37524	0	3.65723	30.5809	94.4369	50.6743	130.291	0	164.53	130.093	86.6267	163.687	29.7181	0	0	135.101	116.096	108.588	148.844	26.0581	52.6912	2.04309	59.1639
TMEM225B_c.74A>G_p.Y25C	TMEM225B_7:99604462_A>G_4	44.7361	157.444	0	0	0	0	0	0	0	0	0	9.40241	0	0	1.09717	16.9894	10.8966	6.60969	86.6915	0	89.4814	104.074	94.748	43.6499	9.14402	0	0	93.5317	97.521	105.086	101.986	35.5338	75.2731	2.38361	23.6655
TMEM225B_c.74A>G_p.Y25C	TMEM225B_7:99604462_A>G_2	50.0951	38.6282	0	0	0	0	0	0	0	0	0.795638	9.40241	0	0	0.182862	3.39787	3.63219	2.20323	114.997	0	152.984	145.704	100.162	98.2123	38.8621	0	0	107.388	146.281	105.086	110.255	45.0095	90.3277	2.38361	29.5819
TMEM225B_c.74A>G_p.Y25C	TMEM225B_7:99604462_A>G_5	61.5121	170.033	211.203	0	0	0	0	0	0	5.39638	0.795638	0	0	0	1.46289	11.8926	25.4253	13.2194	170.003	0	228.033	202.944	159.718	101.85	45.7201	0	0	207.848	185.754	182.148	223.267	45.0095	135.492	6.12927	112.411
TMEM225B_c.74A>G_p.Y25C	TMEM225B_7:99604462_A>G_3	39.6101	121.403	0	0	0	0	0	0	0	0	0.795638	0	0	0	0.914308	13.5915	10.8966	11.0162	100.042	0	63.503	88.4629	78.5055	54.5624	13.716	0	0	107.388	76.6236	84.0684	85.4477	18.9514	37.6366	2.04309	65.0802
TMEM192_c.719A>G_p.D240G	TMEM192_4:165079755_A>G_2	111.374	379.212	0	0	0	0	0	0	0	10.7928	1.59128	0	1.37524	0	2.01148	15.2904	32.6897	39.6582	198.309	0	268.444	215.954	213.86	221.887	48.0061	0	0	197.456	253.09	185.651	217.754	49.7473	90.3277	5.10773	94.6622
TMEM192_c.719A>G_p.D240G	TMEM192_4:165079755_A>G_6	152.848	364.209	0	0	0	0	0	0	0	10.7928	1.59128	37.6096	1.37524	0	3.10865	23.7851	32.6897	30.8452	163.92	0	118.346	150.907	194.91	192.787	11.43	0	0	155.886	155.569	189.154	146.088	35.5338	52.6912	4.4267	53.2475
TMEM192_c.719A>G_p.D240G	TMEM192_4:165079755_A>G_3	137.936	334.376	0	0	0	0	0	0	0	21.5855	0	9.40241	0	0	2.19434	16.9894	50.8506	22.0323	172.369	0	181.849	137.898	143.476	185.512	27.432	0	0	148.958	148.603	196.16	146.088	45.0095	82.8004	5.44824	65.0802
TMEM192_c.719A>G_p.D240G	TMEM192_4:165079755_A>G_4	119.296	37.9384	0	0	0	0	0	0	0	10.7928	0.795638	28.2072	0	0	0.548585	3.39787	7.26438	8.81292	181.748	0	187.622	158.713	170.546	250.987	45.7201	0	0	221.705	155.569	161.131	179.165	49.7473	165.601	4.76721	76.913
TMEM192_c.719A>G_p.D240G	TMEM192_4:165079755_A>G_5	126.985	270.742	0	0	0	0	0	0	0	16.1891	1.59128	28.2072	2.75047	0	1.46289	30.5809	50.8506	24.2355	233.459	0	265.558	210.75	232.809	210.975	29.7181	0	0	218.241	262.378	266.217	209.485	61.5919	135.492	4.08618	124.244
TMEM156_c.4A>G_p.T2A	TMEM156_4:39032310_A>G_3	126.519	318.683	0	0	0	0	33.1059	0	0	16.1891	0.795638	9.40241	1.37524	0	2.92579	22.0862	25.4253	39.6582	242.331	0	216.487	187.333	203.031	156.412	59.4361	0	0	294.452	215.939	248.702	209.485	85.2811	75.2731	2.72412	94.6622
TMEM156_c.4A>G_p.T2A	TMEM156_4:39032310_A>G_6	84.5791	64.3229	0	0	0	0	0	0	0	5.39638	0.795638	0	1.37524	0	1.09717	5.09681	18.1609	15.4226	152.175	0	141.438	127.491	135.354	123.675	29.7181	0	0	142.03	146.281	147.12	165.383	35.5338	135.492	4.76721	53.2475
TMEM156_c.4A>G_p.T2A	TMEM156_4:39032310_A>G_2	103.685	82.9472	0	0	0	0	0	0	0	5.39638	0	9.40241	0	0	0.731447	11.8926	7.26438	8.81292	201.773	0	259.785	244.574	197.617	156.412	43.4341	0	0	252.882	192.72	168.137	190.19	87.65	97.8551	4.08618	100.579
TMEM156_c.4A>G_p.T2A	TMEM156_4:39032310_A>G_5	100.19	181.415	0	0	0	0	0	0	0	59.3601	1257.11	667.571	16.5028	0	0.731447	11.8926	7.26438	13.2194	163.92	0	196.282	111.88	173.253	185.512	16.002	0	0	211.312	132.35	126.103	115.768	42.6406	90.3277	3.06464	112.411
TMEM156_c.4A>G_p.T2A	TMEM156_4:39032310_A>G_4	186.167	302.473	0	0	0	0	0	0	0	16.1891	1.59128	18.8048	2.75047	0	2.74292	15.2904	65.3794	22.0323	241.232	0	228.033	208.148	197.617	247.349	27.432	0	0	187.063	218.261	252.205	248.074	63.9608	105.382	5.78876	100.579
TMEM132C_c.739A>G_p.R247G	TMEM132C_12:128415385_A>G_6	116.733	179	0	0	0	0	0	0	0	5.39638	0	0	2.75047	0	1.46289	6.79575	25.4253	24.2355	187.409	0	213.601	210.75	213.86	145.5	20.574	0	0	190.528	171.823	175.143	206.728	59.223	67.7458	5.44824	124.244
TMEM132C_c.739A>G_p.R247G	TMEM132C_12:128415385_A>G_5	187.099	174.344	0	0	0	0	0	0	0	10.7928	2.38691	0	4.12571	0	0.914308	18.6883	25.4253	15.4226	254.329	0	245.352	249.778	251.759	207.337	48.0061	0	0	200.92	213.617	224.182	231.536	63.9608	82.8004	6.12927	82.8294
TMEM132C_c.739A>G_p.R247G	TMEM132C_12:128415385_A>G_2	136.072	70.531	0	0	0	0	0	0	0	0	0.795638	9.40241	4.12571	0	0	8.49469	10.8966	4.40646	250.442	0	199.168	195.139	249.052	210.975	2283.72	0	0	211.312	220.583	266.217	198.459	3532.06	6744.47	23544.2	5999.21
TMEM132C_c.739A>G_p.R247G	TMEM132C_12:128415385_A>G_4	125.354	252.463	0	0	0	0	0	0	0	16.1891	0	9.40241	1.37524	0	1.28003	16.9894	25.4253	15.4226	192.817	0	164.53	166.518	208.446	160.05	32.0041	0	0	187.063	188.076	168.137	184.677	28.427	60.2185	4.4267	118.328
TMEM132C_c.739A>G_p.R247G	TMEM132C_12:128415385_A>G_3	115.801	106.745	0	0	0	0	0	0	0	0	0.795638	0	1.37524	0	0.914308	6.79575	10.8966	6.60969	223.319	0	190.509	192.537	230.102	160.05	27.432	0	0	211.312	195.042	185.651	190.19	37.9027	60.2185	3.74567	88.7458
TIMP2_c.95T>C_p.V32A	TIMP2_17:78924994_T>C_6	108.578	234.356	0	0	0	0	33.1059	0	0	5.39638	2.38691	0	0	0	2.3772	16.9894	29.0575	35.2517	154.541	0	135.665	104.074	119.112	145.5	11.43	0	0	124.709	127.706	119.097	113.012	26.0581	82.8004	4.08618	47.3311
TIMP2_c.95T>C_p.V32A	TIMP2_17:78924994_T>C_3	156.343	215.904	0	0	0	0	0	0	0	5.39638	2.38691	18.8048	1.37524	0	6935.58	1049.94	1932.32	1705.3	263.032	0	242.466	213.352	235.516	207.337	52.5781	57.7857	0	270.203	225.227	231.188	239.805	90.019	127.964	7.15082	112.411
TIMP2_c.95T>C_p.V32A	TIMP2_17:78924994_T>C_2	135.14	67.4269	0	0	0	0	0	0	0	26.9819	0.795638	18.8048	1.37524	0	0.731447	1.69894	10.8966	11.0162	193.408	0	236.693	200.343	181.375	203.7	25.146	0	0	193.992	183.432	178.645	237.049	82.9122	97.8551	4.4267	82.8294
TIMP2_c.95T>C_p.V32A	TIMP2_17:78924994_T>C_4	89.4722	155.375	0	0	0	0	0	0	13.3297	5.39638	0.795638	0	1.37524	0	7.86305	6.79575	25.4253	15.4226	141.698	0	147.211	96.2685	140.768	101.85	18.288	0	0	131.637	148.603	136.611	121.281	30.796	75.2731	3.74567	41.4147
TIMP2_c.95T>C_p.V32A	TIMP2_17:78924994_T>C_5	64.7741	181.242	0	0	0	0	0	0	0	21.5855	0.795638	18.8048	2.75047	0	1.28003	13.5915	18.1609	15.4226	124.461	0	141.438	117.083	138.061	58.1999	27.432	924.572	0	117.781	123.062	157.628	121.281	35.5338	37.6366	3.40515	35.4983
TIA1_c.953A>G_p.Q318R	TIA1_2:70214430_A>G_5	164.964	403.872	0	0	0	0	0	0	0	21.5855	1.59128	18.8048	1.37524	0	2.19434	22.0862	54.4828	44.0646	230.586	0	219.374	226.361	270.709	221.887	38.8621	0	0	242.49	241.481	196.16	253.587	71.0676	165.601	5.78876	82.8294
TIA1_c.953A>G_p.Q318R	TIA1_2:70214430_A>G_2	89.9382	88.638	0	0	0	0	0	0	0	5.39638	2.38691	18.8048	1.37524	0	0.731447	1.69894	7.26438	11.0162	114.659	0	106.8	117.083	105.576	141.862	29.7181	0	0	128.173	88.2333	136.611	101.986	40.2716	90.3277	2.38361	41.4147
TIA1_c.953A>G_p.Q318R	TIA1_2:70214430_A>G_6	165.896	153.823	0	0	0	0	0	12.4517	0	0	0.795638	0	1.37524	0	1.28003	15.2904	10.8966	28.642	249.682	1124.85	245.352	208.148	230.102	203.7	32.0041	0	0	266.739	215.939	199.662	231.536	87.65	120.437	6.12927	136.077
TIA1_c.953A>G_p.Q318R	TIA1_2:70214430_A>G_4	109.044	217.456	0	0	0	0	0	0	0	10.7928	0	0	1.37524	0	0.365723	5.09681	10.8966	19.8291	159.441	0	144.325	174.324	197.617	167.325	29.7181	0	0	159.35	176.467	147.12	140.575	37.9027	75.2731	2.04309	70.9966
TIA1_c.953A>G_p.Q318R	TIA1_2:70214430_A>G_3	103.452	149.684	0	0	0	0	0	0	0	0	0	9.40241	0	0	0.914308	10.1936	21.7931	13.2194	129.953	0	144.325	117.083	148.89	134.587	20.574	0	0	93.5317	141.638	108.588	101.986	18.9514	22.5819	3.06464	53.2475
TGFBRAP1_c.418A>G_p.I140V	TGFBRAP1_2:105307884_A>G_4	151.916	339.894	0	0	0	0	0	0	0	10.7928	1.59128	37.6096	0	0	1.64575	5.09681	39.9541	37.4549	192.394	0	233.806	226.361	162.425	258.262	1835.66	0	0	207.848	197.364	241.697	220.51	2750.32	5314.28	17871.9	4608.86
TGFBRAP1_c.418A>G_p.I140V	TGFBRAP1_2:105307884_A>G_6	162.634	251.428	0	0	0	0	0	0	0	10.7928	0	18.8048	2.75047	0	2.01148	25.4841	47.2184	22.0323	254.582	0	262.671	260.185	184.082	247.349	59.4361	0	0	277.131	269.344	217.177	250.83	73.4365	135.492	6.8103	124.244
TGFBRAP1_c.418A>G_p.I140V	TGFBRAP1_2:105307884_A>G_2	130.713	100.882	0	0	0	0	0	0	0	10.7928	11.1389	18.8048	2.75047	0	1.28003	6.79575	29.0575	13.2194	266.412	0	274.217	226.361	254.466	261.899	50.2921	0	0	249.418	273.988	290.737	292.176	61.5919	135.492	4.76721	136.077
TGFBRAP1_c.418A>G_p.I140V	TGFBRAP1_2:105307884_A>G_3	194.788	164.17	0	0	0	0	0	0	0	59.3601	786.09	441.913	8.25141	0	0.731447	6.79575	25.4253	15.4226	310.518	0	256.898	275.796	254.466	290.999	22.86	57.7857	0	214.777	229.871	280.228	239.805	90.019	127.964	7.49133	124.244
TGFBRAP1_c.418A>G_p.I140V	TGFBRAP1_2:105307884_A>G_5	195.021	361.277	0	0	0	0	0	0	0	0	3.18255	37.6096	1.37524	0	3.84009	16.9894	47.2184	48.4711	245.541	0	285.763	270.593	259.88	345.562	61.7221	0	0	297.916	350.611	297.742	286.663	82.9122	135.492	7.15082	100.579
TEX37_c.487A>G_p.I163V	TEX37_2:88529418_A>G_6	174.517	192.796	0	0	0	0	0	0	0	10.7928	0	9.40241	2.75047	0	0.731447	5.09681	7.26438	13.2194	256.188	0	242.466	267.991	224.688	247.349	48.0061	0	0	297.916	264.7	308.251	198.459	85.2811	158.074	6.46979	100.579
TEX37_c.487A>G_p.I163V	TEX37_2:88529418_A>G_4	98.3262	27.4191	0	0	0	0	0	0	0	5.39638	0.795638	28.2072	1.37524	0	0	0	0	0	170.088	0	202.055	346.046	322.143	298.274	29.7181	0	0	190.528	178.788	182.148	135.063	97.1257	120.437	6.12927	106.495
TEX37_c.487A>G_p.I163V	TEX37_2:88529418_A>G_2	95.9962	86.2237	0	0	0	0	0	0	0	5.39638	0.795638	0	0	0	0.365723	10.1936	25.4253	13.2194	155.808	0	121.233	148.306	186.789	90.9373	34.2901	0	0	135.101	132.35	122.6	124.037	21.3203	52.6912	2.72412	76.913
TEX37_c.487A>G_p.I163V	TEX37_2:88529418_A>G_5	85.2781	76.9116	0	0	0	0	0	0	0	5.39638	0	0	1.37524	0	1.09717	5.09681	7.26438	6.60969	165.018	0	219.374	163.917	143.476	141.862	41.1481	0	0	176.671	148.603	178.645	179.165	54.4852	15.0546	5.44824	65.0802
TEX37_c.487A>G_p.I163V	TEX37_2:88529418_A>G_3	81.0841	94.1563	0	0	0	0	0	0	0	0	1.59128	9.40241	0	0	0.182862	5.09681	14.5288	8.81292	212.673	0	228.033	153.509	186.789	105.487	41.1481	0	0	214.777	218.261	227.685	214.998	45.0095	97.8551	4.4267	53.2475
TET1_c.3316A>G_p.S1106G	TET1_10:68646045_A>G_4	207.137	322.477	0	0	0	0	0	0	0	5.39638	3.18255	18.8048	1.37524	0	1.64575	22.0862	36.3219	35.2517	291.253	0	323.288	333.037	276.123	323.737	54.8641	0	0	284.059	297.207	315.257	297.689	194.251	233.347	7.49133	136.077
TET1_c.3316A>G_p.S1106G	TET1_10:68646045_A>G_3	238.592	578.906	0	0	0	0	0	0	0	32.3783	1.59128	18.8048	4.12571	0	3.47437	33.9787	36.3219	68.3002	344.4	0	334.834	327.833	338.386	345.562	54.8641	0	0	322.165	348.289	343.279	256.343	94.7568	135.492	6.8103	165.659
TET1_c.3316A>G_p.S1106G	TET1_10:68646045_A>G_5	257.465	942.08	0	0	0	0	0	0	0	32.3783	3.97819	18.8048	2.75047	0	4.93726	71.3554	119.862	90.3325	367.974	0	349.266	356.454	408.77	392.849	50.2921	0	0	304.844	376.152	329.268	286.663	75.8054	120.437	9.87494	147.91
TET1_c.3316A>G_p.S1106G	TET1_10:68646045_A>G_2	195.021	528.206	0	0	0	0	0	0	0	21.5855	3.97819	28.2072	2.75047	0	4.93726	42.4734	76.2759	63.8937	315.757	0	308.855	283.602	303.194	320.099	34.2901	57.7857	0	266.739	236.837	231.188	294.932	82.9122	135.492	8.17236	106.495
TET1_c.3316A>G_p.S1106G	TET1_10:68646045_A>G_6	227.641	633.054	0	0	0	0	0	0	0	21.5855	3.97819	0	0	0	3.29151	39.0756	69.0116	52.8775	312.039	0	372.358	338.241	270.709	327.374	80.0101	57.7857	0	322.165	308.816	273.222	294.932	78.1744	173.128	9.53442	118.328
TESC_c.422A>G_p.E141G	TESC_12:117046656_A>G_4	82.9481	54.4934	0	0	0	0	0	0	0	0	1.59128	9.40241	4.12571	0	0.365723	3.39787	7.26438	11.0162	130.713	0	124.119	137.898	100.162	90.9373	25.146	1040.14	0	152.422	106.809	119.097	107.499	21.3203	52.6912	3.40515	59.1639
TESC_c.422A>G_p.E141G	TESC_12:117046656_A>G_2	88.7732	366.623	0	0	0	0	33.1059	0	0	5.39638	2.38691	0	0	0	1.82862	11.8926	32.6897	39.6582	105.703	0	95.2544	96.2685	100.162	141.862	16.002	0	0	93.5317	106.809	101.583	104.742	33.1649	45.1639	4.08618	82.8294
TESC_c.422A>G_p.E141G	TESC_12:117046656_A>G_3	80.1521	209.006	0	0	0	0	0	0	0	10.7928	1.59128	9.40241	4.12571	0	0.914308	13.5915	10.8966	19.8291	102.492	0	127.006	137.898	110.991	50.9249	18.288	0	0	128.173	113.774	119.097	118.524	40.2716	52.6912	1.02155	53.2475
TESC_c.422A>G_p.E141G	TESC_12:117046656_A>G_6	109.277	521.309	0	0	0	0	0	0	0	5.39638	0.795638	0	1.37524	0	3.47437	30.5809	39.9541	46.2679	119.391	0	109.687	130.093	127.233	87.2998	34.2901	0	0	142.03	139.316	143.617	79.935	37.9027	52.6912	4.4267	70.9966
TESC_c.422A>G_p.E141G	TESC_12:117046656_A>G_5	114.403	30.1783	0	0	0	0	0	0	0	0	0.795638	0	1.37524	0	1.09717	5.09681	7.26438	2.20323	169.158	0	158.757	140.5	135.354	138.225	25.146	0	0	183.599	125.384	178.645	187.434	30.796	75.2731	6.12927	59.1639
TDRD15_c.1464A>G_p.I488M	TDRD15_2:21138931_A>G_4	81.3171	120.023	0	0	0	0	33.1059	0	0	10.7928	0	0	1.37524	0	0.731447	3.39787	7.26438	11.0162	84.5791	0	80.8219	93.6666	108.283	134.587	34.2901	0	0	145.494	74.3017	94.577	115.768	40.2716	45.1639	4.4267	65.0802
TDRD15_c.1464A>G_p.I488M	TDRD15_2:21138931_A>G_5	89.0062	172.62	0	0	0	0	0	0	0	10.7928	0.795638	0	1.37524	0	1.28003	11.8926	21.7931	30.8452	85.0861	0	101.027	104.074	78.5055	72.7499	16.002	0	0	69.2828	109.131	119.097	113.012	18.9514	82.8004	3.40515	53.2475
TDRD15_c.1464A>G_p.I488M	TDRD15_2:21138931_A>G_3	65.7061	108.297	0	0	0	0	0	0	0	16.1891	0	9.40241	1.37524	0	0.731447	1.69894	10.8966	2.20323	85.7621	0	98.1409	75.4537	81.2126	116.4	25.146	0	0	110.852	97.521	84.0684	63.3967	26.0581	22.5819	2.38361	65.0802
TDRD15_c.1464A>G_p.I488M	TDRD15_2:21138931_A>G_6	88.0741	537.346	0	0	0	0	0	0	0	5.39638	0.795638	9.40241	1.37524	0	4.20582	25.4841	79.9081	55.0808	78.58	0	80.8219	101.472	102.869	149.137	18.288	0	0	100.46	83.5894	101.583	132.306	40.2716	37.6366	2.72412	47.3311
TDRD15_c.1464A>G_p.I488M	TDRD15_2:21138931_A>G_2	66.4051	127.956	0	0	0	0	0	0	0	10.7928	0	9.40241	0	0	0.182862	6.79575	7.26438	11.0162	94.3805	0	69.276	109.278	73.0913	72.7499	18.288	0	0	93.5317	92.8771	108.588	113.012	18.9514	45.1639	3.06464	41.4147
TAF4B_c.974A>G_p.K325R	TAF4B_18:26285883_A>G_4	116.267	443.707	0	0	0	0	0	0	0	10.7928	0.795638	18.8048	1.37524	0	3.65723	35.6777	79.9081	61.6905	111.786	0	112.573	96.2685	121.819	156.412	27.432	0	0	83.1393	85.9113	105.086	79.935	28.427	67.7458	2.04309	35.4983
TAF4B_c.974A>G_p.K325R	TAF4B_18:26285883_A>G_6	107.879	202.798	0	0	0	0	0	0	0	5.39638	0	0	0	0	1.82862	11.8926	47.2184	11.0162	122.771	0	75.0489	106.676	105.576	192.787	27.432	0	0	152.422	116.096	122.6	110.255	23.6892	52.6912	3.40515	70.9966
TAF4B_c.974A>G_p.K325R	TAF4B_18:26285883_A>G_2	111.141	138.13	0	0	0	0	0	0	0	5.39638	1.59128	0	1.37524	0	3272.13	489.294	1017.01	927.56	110.435	0	124.119	132.694	113.698	156.412	25.146	0	0	128.173	97.521	136.611	140.575	23.6892	60.2185	2.38361	53.2475
TAF4B_c.974A>G_p.K325R	TAF4B_18:26285883_A>G_3	99.0252	57.5974	0	0	0	0	0	0	0	16.1891	617.415	310.28	4.12571	0	0	3.39787	0	2.20323	107.731	0	124.119	109.278	140.768	167.325	36.5761	0	0	100.46	109.131	147.12	118.524	30.796	22.5819	3.40515	88.7458
TAF4B_c.974A>G_p.K325R	TAF4B_18:26285883_A>G_5	143.994	549.59	0	0	0	0	0	0	0	16.1891	4.77383	28.2072	1.37524	0	5.12013	32.2798	61.7472	61.6905	169.243	0	138.552	150.907	194.91	290.999	36.5761	0	0	162.815	167.179	147.12	132.306	52.1162	90.3277	5.10773	65.0802
TACR1_c.1045T>C_p.Y349H	TACR1_2:75049611_T>C_4	90.8702	230.217	0	0	0	0	0	12.4517	0	10.7928	0.795638	9.40241	1.37524	0	2.74292	16.9894	58.115	37.4549	237.261	0	210.714	254.981	227.395	105.487	20.574	57.7857	0	228.633	199.686	210.171	206.728	35.5338	52.6912	2.38361	82.8294
TACR1_c.1045T>C_p.Y349H	TACR1_2:75049611_T>C_2	147.489	276.088	0	0	0	0	33.1059	0	0	10.7928	1.59128	9.40241	1.37524	0	1.28003	20.3872	21.7931	13.2194	228.474	0	181.849	239.37	184.082	174.6	32.0041	0	0	252.882	195.042	199.662	187.434	47.3784	45.1639	3.06464	47.3311
TACR1_c.1045T>C_p.Y349H	TACR1_2:75049611_T>C_6	124.888	95.7083	0	0	0	0	0	0	0	0	0.795638	0	1.37524	0	0	1.69894	14.5288	8.81292	217.236	0	207.828	236.768	208.446	149.137	34.2901	0	0	145.494	234.515	224.182	198.459	73.4365	143.019	5.78876	118.328
TACR1_c.1045T>C_p.Y349H	TACR1_2:75049611_T>C_3	114.869	60.7015	0	0	0	0	0	0	0	0	0.795638	9.40241	0	0	0.182862	3.39787	7.26438	4.40646	224.671	0	230.92	270.593	322.143	174.6	32.0041	0	0	228.633	227.549	192.657	237.049	63.9608	75.2731	6.8103	124.244
TACR1_c.1045T>C_p.Y349H	TACR1_2:75049611_T>C_5	104.384	145.373	0	0	0	0	33.1059	0	0	5.39638	1.59128	9.40241	1.37524	0	1.09717	16.9894	43.5863	19.8291	211.575	0	294.423	260.185	194.91	145.5	50.2921	0	0	256.346	234.515	224.182	242.561	111.339	150.546	7.49133	100.579
SYNJ1_c.685A>G_p.R229G	SYNJ1_21:32695194_A>G_2	79.2201	305.577	0	0	0	0	0	0	0	5.39638	0	0	1.37524	0	1.82862	16.9894	3.63219	24.2355	107.9	0	51.957	88.4629	105.576	105.487	4.57201	0	0	86.6035	104.487	98.0798	82.6913	18.9514	37.6366	3.06464	23.6655
SYNJ1_c.685A>G_p.R229G	SYNJ1_21:32695194_A>G_3	108.811	210.903	0	0	0	0	0	0	0	16.1891	1.59128	18.8048	1.37524	0	2.3772	8.49469	36.3219	41.8614	126.911	0	118.346	80.6574	127.233	109.125	36.5761	0	0	96.9959	109.131	94.577	159.87	35.5338	45.1639	3.40515	100.579
SYNJ1_c.685A>G_p.R229G	SYNJ1_21:32695194_A>G_6	92.9672	41.2149	0	0	0	0	0	0	0	10.7928	3.18255	18.8048	1.37524	0	0.365723	6.79575	18.1609	6.60969	66.6663	0	63.503	70.25	83.9196	145.5	27.432	0	0	103.924	74.3017	56.0456	79.935	11.8446	45.1639	2.38361	17.7492
SYNJ1_c.685A>G_p.R229G	SYNJ1_21:32695194_A>G_4	89.4722	531.311	0	0	0	0	0	0	0	5.39638	0	9.40241	4.12571	0	2.74292	30.5809	72.6438	33.0485	118.293	0	127.006	130.093	127.233	149.137	48.0061	0	0	114.317	130.028	105.086	121.281	63.9608	112.91	3.40515	94.6622
SYNJ1_c.685A>G_p.R229G	SYNJ1_21:32695194_A>G_5	101.355	463.194	0	0	0	0	0	0	0	0	0	0	0	0	4.57154	30.5809	43.5863	74.9099	86.269	0	115.46	135.296	97.4551	116.4	36.5761	0	0	114.317	139.316	98.0798	85.4477	47.3784	30.1092	3.40515	65.0802
SYNDIG1_c.488A>G_p.Y163C	SYNDIG1_20:24584863_A>G_6	102.986	110.021	0	0	0	0	0	0	0	10.7928	0.795638	9.40241	0	0	0.731447	6.79575	21.7931	15.4226	209.631	0	202.055	236.768	203.031	138.225	32.0041	0	0	176.671	213.617	189.154	209.485	68.6987	45.1639	3.06464	59.1639
SYNDIG1_c.488A>G_p.Y163C	SYNDIG1_20:24584863_A>G_3	130.48	154.168	0	0	0	0	0	0	0	0	1.59128	9.40241	41.2571	0	0.365723	5.09681	21.7931	11.0162	228.812	0	271.331	249.778	200.324	156.412	61.7221	0	0	214.777	195.042	255.708	226.023	49.7473	97.8551	6.8103	70.9966
SYNDIG1_c.488A>G_p.Y163C	SYNDIG1_20:24584863_A>G_4	54.2891	4.82853	0	0	0	0	0	0	0	0	0	0	0	0	0	0	0	0	181.41	0	164.53	153.509	129.94	61.8374	38.8621	0	0	152.422	141.638	178.645	159.87	47.3784	45.1639	2.38361	100.579
SYNDIG1_c.488A>G_p.Y163C	SYNDIG1_20:24584863_A>G_5	95.5302	214.869	0	0	0	0	0	0	0	0	0	9.40241	5.50094	0	0.914308	6.79575	21.7931	22.0323	152.344	0	178.963	135.296	151.597	189.15	22.86	0	0	135.101	127.706	126.103	132.306	127.922	120.437	2.72412	41.4147
SYNDIG1_c.488A>G_p.Y163C	SYNDIG1_20:24584863_A>G_2	106.015	235.908	0	0	0	0	0	0	0	5.39638	1.59128	9.40241	4.12571	0	1.09717	11.8926	25.4253	19.8291	227.544	0	187.622	189.935	251.759	149.137	18.288	0	0	190.528	202.008	192.657	198.459	78.1744	105.382	6.46979	70.9966
SULT1A2_c.464A>G_p.Q155R	SULT1A2_16:28592475_A>G_6	137.47	167.446	0	0	0	0	0	0	0	5.39638	1.59128	18.8048	0	0	1.09717	5.09681	18.1609	11.0162	208.448	0	242.466	189.935	186.789	189.15	32.0041	0	0	176.671	215.939	203.165	176.408	56.8541	90.3277	6.8103	124.244
SULT1A2_c.464A>G_p.Q155R	SULT1A2_16:28592475_A>G_5	123.49	93.639	0	0	0	0	33.1059	0	0	16.1891	0.795638	0	0	0	0.548585	8.49469	18.1609	22.0323	207.857	0	228.033	176.926	194.91	123.675	20.574	57.7857	0	142.03	150.925	199.662	198.459	52.1162	67.7458	4.76721	94.6622
SULT1A2_c.464A>G_p.Q155R	SULT1A2_16:28592475_A>G_4	101.355	27.0742	0	0	0	0	0	0	0	0	0.795638	18.8048	2.75047	0	0.182862	6.79575	0	4.40646	146.176	0	121.233	135.296	119.112	69.1124	20.574	0	0	103.924	120.74	143.617	137.819	33.1649	90.3277	5.78876	70.9966
SULT1A2_c.464A>G_p.Q155R	SULT1A2_16:28592475_A>G_3	80.8511	131.75	0	0	0	0	0	0	0	0	0	0	1.37524	0	0.365723	6.79575	14.5288	11.0162	156.484	0	155.871	158.713	116.405	109.125	20.574	0	0	169.743	164.857	161.131	132.306	59.223	22.5819	2.04309	65.0802
SULT1A2_c.464A>G_p.Q155R	SULT1A2_16:28592475_A>G_2	71.5311	80.7054	0	0	0	0	0	0	0	0	1.59128	18.8048	2.75047	0	0.731447	3.39787	3.63219	6.60969	160.455	0	144.325	156.111	154.304	76.3873	18.288	0	0	145.494	139.316	154.125	146.088	146.873	90.3277	2.38361	65.0802
STX11_c.395A>G_p.Y132C	STX11_6:144187022_A>G_5	189.429	302.473	0	0	0	0	0	0	0	21.5855	3.18255	18.8048	1.37524	0	2.74292	22.0862	58.115	46.2679	308.912	0	285.763	338.241	278.83	236.437	38.8621	0	0	284.059	318.104	301.245	339.035	90.019	127.964	6.12927	177.492
STX11_c.395A>G_p.Y132C	STX11_6:144187022_A>G_6	202.477	487.164	0	0	0	0	33.1059	0	0	16.1891	0.795638	28.2072	5.50094	0	1.82862	27.183	76.2759	55.0808	235.064	0	248.239	223.759	186.789	283.724	43.4341	57.7857	0	225.169	204.33	234.691	226.023	28.427	143.019	5.78876	88.7458
STX11_c.395A>G_p.Y132C	STX11_6:144187022_A>G_2	152.382	241.081	0	0	0	0	0	0	0	16.1891	0	9.40241	1.37524	0	2.01148	11.8926	21.7931	35.2517	260.497	0	230.92	213.352	251.759	189.15	18.288	0	0	259.81	232.193	196.16	226.023	28.427	75.2731	4.08618	76.913
STX11_c.395A>G_p.Y132C	STX11_6:144187022_A>G_3	146.324	201.074	0	0	0	0	0	0	0	10.7928	0	18.8048	1.37524	0	1.28003	13.5915	18.1609	28.642	302.491	0	239.579	338.241	257.173	181.875	34.2901	0	0	287.524	290.241	290.737	250.83	80.5433	120.437	5.10773	118.328
STX11_c.395A>G_p.Y132C	STX11_6:144187022_A>G_4	99.9572	65.8749	0	0	0	0	0	0	0	5.39638	1.59128	0	0	0	0.182862	3.39787	0	4.40646	307.73	0	291.536	320.028	232.809	178.237	34.2901	0	0	329.093	290.241	304.748	305.958	63.9608	135.492	8.51288	106.495
STRIP1_c.1387A>G_p.I463V	STRIP1_1:110045049_A>G_2	97.3942	135.371	0	0	0	0	0	0	0	5.39638	0.795638	0	1.37524	0	1.82862	22.0862	21.7931	39.6582	193.577	0	196.282	143.102	178.668	192.787	25.146	0	0	232.097	188.076	196.16	242.561	80.5433	97.8551	5.78876	76.913
STRIP1_c.1387A>G_p.I463V	STRIP1_1:110045049_A>G_5	65.4731	173.31	0	0	0	0	0	0	0	10.7928	0	18.8048	0	0	1.46289	13.5915	32.6897	6.60969	138.571	0	144.325	104.074	143.476	32.7374	16.002	0	0	131.637	109.131	98.0798	104.742	56.8541	82.8004	3.74567	59.1639
STRIP1_c.1387A>G_p.I463V	STRIP1_1:110045049_A>G_6	78.9871	68.4616	0	0	0	0	0	0	0	5.39638	0.795638	9.40241	0	0	0.182862	5.09681	7.26438	6.60969	106.717	0	98.1409	85.8611	94.748	134.587	20.574	0	0	114.317	127.706	119.097	99.2296	16.5824	45.1639	3.06464	59.1639
STRIP1_c.1387A>G_p.I463V	STRIP1_1:110045049_A>G_4	89.0062	165.722	0	0	0	0	0	0	0	5.39638	0	9.40241	1.37524	0	0.548585	11.8926	10.8966	26.4388	143.303	0	109.687	98.8703	124.526	189.15	20.574	0	0	103.924	88.2333	136.611	99.2296	23.6892	45.1639	1.02155	23.6655
STRIP1_c.1387A>G_p.I463V	STRIP1_1:110045049_A>G_3	88.0741	271.605	0	0	0	0	0	0	0	5.39638	0	9.40241	0	0	1.82862	11.8926	61.7472	26.4388	116.687	0	86.5949	119.685	89.3338	120.037	13.716	0	0	86.6035	90.5552	112.091	113.012	18.9514	37.6366	3.06464	59.1639
STKLD1_c.1205T>C_p.V402A	STKLD1_9:133401744_T>C_5	176.381	337.307	0	0	0	0	0	0	0	16.1891	0	28.2072	0	0	2.01148	25.4841	25.4253	41.8614	271.735	0	392.564	252.38	211.153	261.899	48.0061	0	0	304.844	297.207	269.72	275.638	66.3298	143.019	7.49133	195.241
STKLD1_c.1205T>C_p.V402A	STKLD1_9:133401744_T>C_3	223.68	309.888	0	0	0	0	0	0	0	26.9819	3.97819	28.2072	1.37524	0	1.82862	27.183	47.2184	28.642	360.623	0	395.45	392.88	276.123	367.387	57.1501	0	0	384.519	318.104	367.799	341.791	75.8054	173.128	7.83185	124.244
STKLD1_c.1205T>C_p.V402A	STKLD1_9:133401744_T>C_4	196.186	237.633	0	0	0	0	0	0	0	10.7928	1.59128	28.2072	2.75047	0	2.56006	23.7851	36.3219	39.6582	266.327	0	300.196	234.167	221.981	294.637	34.2901	0	0	256.346	241.481	224.182	292.176	75.8054	75.2731	5.78876	141.993
STKLD1_c.1205T>C_p.V402A	STKLD1_9:133401744_T>C_2	162.168	461.642	0	0	0	0	0	0	0	0	3.18255	28.2072	0	0	3.29151	42.4734	87.1725	55.0808	227.629	0	196.282	215.954	162.425	316.462	32.0041	0	0	180.135	211.295	206.668	242.561	45.0095	52.6912	3.40515	70.9966
STKLD1_c.1205T>C_p.V402A	STKLD1_9:133401744_T>C_6	191.526	60.529	0	0	0	0	0	0	0	37.7746	0.795638	18.8048	4.12571	0	0.365723	3.39787	10.8966	6.60969	274.27	0	329.061	335.639	240.931	214.612	36.5761	0	0	249.418	285.597	325.765	281.151	99.4946	218.292	6.46979	118.328
STAB1_c.5042T>C_p.I1681T	STAB1_3:52519271_T>C_3	88.3071	107.78	0	0	0	0	0	0	0	5.39638	0	0	1.37524	0	0.548585	11.8926	18.1609	15.4226	106.463	0	112.573	96.2685	157.011	189.15	16.002	0	0	121.245	127.706	80.5656	121.281	47.3784	52.6912	2.04309	53.2475
STAB1_c.5042T>C_p.I1681T	STAB1_3:52519271_T>C_2	68.9681	135.371	0	0	0	0	0	0	0	10.7928	0.795638	0	0	0	3191.67	480.799	944.369	788.757	100.718	0	92.3679	109.278	78.5055	120.037	20.574	0	0	96.9959	83.5894	80.5656	79.935	37.9027	7.52731	2.04309	41.4147
STAB1_c.5042T>C_p.I1681T	STAB1_3:52519271_T>C_5	27.727	12.0713	0	0	0	0	33.1059	0	0	0	0.795638	0	0	0	0	1.69894	3.63219	0	50.1053	0	54.8435	80.6574	67.6771	18.1875	4.57201	0	0	34.6414	69.6578	59.5485	71.6658	14.2135	22.5819	2.72412	41.4147
STAB1_c.5042T>C_p.I1681T	STAB1_3:52519271_T>C_6	57.7841	12.0713	0	0	0	0	0	0	0	0	0.795638	0	0	0	0.548585	1.69894	3.63219	4.40646	113.054	0	89.4814	122.287	110.991	87.2998	32.0041	0	0	117.781	120.74	136.611	135.063	45.0095	37.6366	3.06464	65.0802
STAB1_c.5042T>C_p.I1681T	STAB1_3:52519271_T>C_4	50.0951	91.0522	0	0	0	0	0	0	0	0	0	9.40241	0	0	0.365723	3.39787	10.8966	8.81292	74.5243	0	95.2544	106.676	56.8488	58.1999	11.43	0	0	65.8186	88.2333	115.594	74.4222	21.3203	52.6912	1.02155	23.6655
ST5_c.1472T>C_p.I491T	ST5_11:8726078_T>C_4	132.344	359.208	0	0	0	0	0	0	0	26.9819	0	9.40241	1.37524	0	2.74292	16.9894	10.8966	30.8452	161.385	0	164.53	161.315	146.183	185.512	41.1481	0	0	190.528	227.549	164.634	212.241	106.601	112.91	5.44824	82.8294
ST5_c.1472T>C_p.I491T	ST5_11:8726078_T>C_6	95.0642	139.51	0	0	0	0	0	0	0	16.1891	0	9.40241	0	0	0.731447	5.09681	10.8966	6.60969	122.179	0	147.211	98.8703	135.354	116.4	27.432	0	0	114.317	116.096	133.108	157.114	30.796	97.8551	4.4267	70.9966
ST5_c.1472T>C_p.I491T	ST5_11:8726078_T>C_3	112.772	413.874	0	0	0	0	0	0	0	0	2.38691	0	1.37524	0	3.10865	40.7745	61.7472	72.7066	160.033	0	204.941	236.768	235.516	269.174	20.574	0	0	145.494	160.213	140.114	151.601	45.0095	30.1092	3.40515	59.1639
ST5_c.1472T>C_p.I491T	ST5_11:8726078_T>C_2	114.869	417.84	0	0	0	0	0	0	0	16.1891	1.59128	37.6096	0	0	2.56006	27.183	39.9541	39.6582	170.341	0	170.303	176.926	132.647	236.437	43.4341	57.7857	0	148.958	171.823	154.125	165.383	63.9608	82.8004	3.40515	76.913
ST5_c.1472T>C_p.I491T	ST5_11:8726078_T>C_5	56.3861	16.555	0	0	0	0	0	0	0	0	0.795638	9.40241	1.37524	0	0	1.69894	3.63219	2.20323	65.0609	0	83.7084	91.0648	62.263	98.2123	13.716	0	0	114.317	55.7263	87.5713	85.4477	30.796	37.6366	2.38361	35.4983
ST3GAL3_c.622A>G_p.I208V	ST3GAL3_1:43898252_A>G_6	166.828	614.948	0	0	0	0	0	24.9034	0	10.7928	3.97819	37.6096	1.37524	0	382.912	105.334	170.713	147.616	206.674	0	222.26	200.343	151.597	254.624	18.288	0	0	193.992	206.652	143.617	192.946	52.1162	120.437	6.12927	70.9966
ST3GAL3_c.622A>G_p.I208V	ST3GAL3_1:43898252_A>G_2	142.829	348.344	0	0	0	0	0	0	0	16.1891	0.795638	9.40241	4.12571	0	1.46289	13.5915	32.6897	15.4226	218.165	0	303.082	239.37	200.324	225.525	36.5761	809	0	218.241	227.549	255.708	203.972	73.4365	82.8004	3.40515	94.6622
ST3GAL3_c.622A>G_p.I208V	ST3GAL3_1:43898252_A>G_5	153.78	600.807	0	0	0	0	0	0	4.44324	21.5855	163.901	75.2193	5.50094	0	8.22877	27.183	69.0116	61.6905	286.099	0	277.104	247.176	265.294	283.724	38.8621	0	0	294.452	276.309	210.171	283.907	71.0676	143.019	4.08618	141.993
ST3GAL3_c.622A>G_p.I208V	ST3GAL3_1:43898252_A>G_4	190.128	630.123	0	0	0	0	0	0	0	10.7928	2.38691	37.6096	2.75047	0	5.85157	47.5702	72.6438	72.7066	230.079	0	291.536	241.972	219.274	294.637	43.4341	0	0	256.346	206.652	210.171	264.612	59.223	165.601	4.4267	82.8294
ST3GAL3_c.622A>G_p.I208V	ST3GAL3_1:43898252_A>G_3	85.2781	169.861	0	0	0	0	0	0	0	0	0.795638	28.2072	0	0	1.64575	11.8926	25.4253	15.4226	189.268	0	228.033	244.574	181.375	90.9373	38.8621	0	0	207.848	211.295	178.645	223.267	56.8541	143.019	5.44824	65.0802
[truncated: 2,965 more rows]

## Sheet: Rank_ABE
SNV	BE_12	BE_13	BE_14	BE_15	BE_16	BE_17	BE_18	BE_19	BE_20	BE_3	BE_4	BE_5	BE_6	BE_7	BE_31	BE_32	BE_33	BE_34	BE_35	BE_36	BE_37	BE_38	BE_23	BE_24	BE_25	BE_26	BE_27	BE_28
[truncated: 127 more rows]

[truncated: 4 more sheets: Score_ABE, Count_CBE, Rank_CBE, Score_CBE]
