# Supplementary material
Source: Research Square preprint supplement (doi:10.21203/rs.3.rs-8902045/v1)
Supplement: Supplementary file 2 [file 123b48860591c76b799ba68f.xlsx]

## Sheet: Legend
Sheet	Legend
oligos and primers	Detailed information of oligos and primers in this study

## Sheet: oligos and primers
Name	Sequence (5' to 3')
Primers for gene knockout
sgRNA_Il17b-1_Forward	CACCGACCTACCTGTAGCCCCATG
sgRNA_Il17b-1_Reverse	AAACCATGGGGCTACAGGTAGGTC
sgRNA_Il17b-2_Forward	CACCGATCCCTGCGGACTTGCCCG
sgRNA_Il17b-2_Reverse	AAACCGGGCAAGTCCGCAGGATC
sgRNA_SMARCA1-1_Forward	CACCGGATAGTGGCGGTCGCATCCG
sgRNA_SMARCA1-1_Reverse	AAACCGGATGCGACCGCCACTATCC
sgRNA_SMARCA1-2_Forward	CACCGGGATGCGACCGCCACTATCG
sgRNA_SMARCA1-2_Reverse	AAACCGATAGTGGCGGTCGCATCCC
sgRNA_SOD1-1_Forward	CACCGTTGCATCATTGGCCGCACAC
sgRNA_SOD1-1_Reverse	AAACGTGTGCGGCCAATGATGCAAC
sgRNA_SOD1-2_Forward	CACCGAAGGCCGTGTGCGTGCTGAA
sgRNA_SOD1-2_Reverse	AAACTTCAGCACGCACACGGCCTTC
sgRNA_SMARCA4-1_Forward	CACCGCGAGTACGTGGCTAACCTCA
sgRNA_SMARCA4-1_Reverse	AAACTGAGGTTAGCCACGTACTCGC
sgRNA_SMARCA4-2_Forward	CACCGCGTGGCTAACCTCACGGAGC
sgRNA_SMARCA4-2_Reverse	AAACGCTCCGTGAGGTTAGCCACGC
sgRNA_MVK-1_Forward	CACCGACATTGGTATCAAGCGGGCC
sgRNA_MVK-1_Reverse	AAACGGCCCGCTTGATACCAATGTC
sgRNA_MVK-2_Forward	CACCGACCCAACATTGGTATCAAGC
sgRNA_MVK-2_Reverse	AAACGCTTGATACCAATGTTGGGTC
sgRNA_TGFBR1-1_Forward	CACCGGTTGTGTATAACTTTGTCTG
sgRNA_TGFBR1-1_Reverse	AAACCAGACAAAGTTATACACAACC
sgRNA_TGFBR1-2_Forward	CACCGTGGCAGAAACACTGTAACGC
sgRNA_TGFBR1-2_Reverse	AAACGCGTTACAGTGTTTCTGCCAC
sgRNA_TGFBR2-1_Forward	CACCGAAAGCGACCTTTCCCCACCA
sgRNA_TGFBR2-1_Reverse	AAACTGGTGGGGAAAGGTCGCTTTC
sgRNA_TGFBR2-2_Forward	CACCGACCTACAGGAGTACCTGACG
sgRNA_TGFBR2-2_Reverse	AAACCGTCAGGTACTCCTGTAGGTC
Primers for DUSP19_c.650C>T with pLenti-SpRY-evoA-BE4max-Blast
Forward	CTACACGACGCTCTTCCGATCTGGGCTGCTGCAATTGTAATAGG
Reverse	AGACGTGTGCTCTTCCGATCTAAGGGAGTTTTGCTAGTCTACTC
Primers for target amplification (DUSP19_c.650C>T)
Forward	CACCGACAGTTCATGAGTTGCATT
Reverse	AAACAATGCAACTCATGAACTGTC
Primers for cloning SMARCA1 (PAM mutated) from SMARCA1 cDNA into pHAGE vector
Fragmen#1_Forward	ATGTACCCATACGACGTCCCAGACT
Fragmen#1_Reverse	GACGACGATAGTGGCGGTCGCATCCGCGGCTG
Fragmen#2_Forward	CAGCGGCGGATGCGACCGCCACTATCGTCGTC
Fragmen#2_Reverse	GGATTTCACCTTCTTGACATCCTTC
Primers for cloning SOD1 (PAM mutated) from SOD1 cDNA into pHAGE vector
Fragmen#1_Forward	ATGGCGACGAAGGCCGTGTGCGTGCTGAAGGACGACGGCC
Fragmen#1_Reverse	TTCATGGACCACCATGTGTGCGGCC
Fragmen#2_Forward	GGCCGCACACTGATGGTCCATGAA
Fragmen#2_Reverse	CTTGTAATCTTGGGCGATCCCAATTACACC
