# Supplementary material
Source: Research Square preprint supplement (doi:10.21203/rs.3.rs-8902045/v1)
Supplement: Supplementary file 3 [file 1cf8612b4961360a4382b033.xlsx]

## Sheet: Legend
Sheet	Legend
Count	Count for each sgRNA in druggable gene CRISPR knockout screen
Score	tRRA scores for genes in druggable gene CRISPR knockout screen
Diff_Score	Diff tRRA Score for mBC vulnerability genes in druggable gene CRISPR knockout screen data in MCF7 cells (scoreDKO-scorecontrol)

## Sheet: Count
Gene	sgRNA	sgAAVS1_Day0	AFDKO_Day0	PTDKO_Day0	sgAAVS1_Day30_Rep1	sgAAVS1_Day30_Rep2	AFDKO_Day30_Rep1	AFDKO_Day30_Rep2	PTDKO_Day30_Rep1	PTDKO_Day30_Rep2
PRLHR	chr10_118594642_118594661_+	847.377	524.057	361.226	253.206	531.687	278.06	360.032	234.856	312.932
PRMT6	chr1_107057277_107057296_-	109.93	78.4303	109.938	0	0	17.7485	0.480042	12.6769	15.9892
MUSK	chr9_110695463_110695482_-	84.2796	42.7802	251.288	134.599	28.1558	204.108	91.6881	230.186	127.914
SGMS2	chr4_107895675_107895694_+	9.16083	73.677	308.874	87.2894	81.1935	242.563	205.458	172.806	244.407
MKNK2	chr19_2040135_2040154_-	269.328	545.447	251.288	371.813	146.017	269.185	282.745	372.301	248.975
HDC	chr15_50254190_50254209_-	200.622	34.4618	62.8219	0	73.3361	186.359	70.0862	44.7028	34.2626
CYP11B2	chr8_142914349_142914368_-	115.426	338.677	141.349	128.602	213.46	263.269	221.78	59.3813	164.461
XPNPEP1	chr10_109873405_109873424_-	411.321	274.506	607.278	521.071	1005.75	201.15	236.181	192.822	132.482
TAOK1	chr17_29478277_29478296_+	141.077	20.2018	0	102.615	284.177	59.1616	33.603	12.6769	20.5576
SLC6A1	chr3_11025564_11025583_-	105.35	160.426	298.404	200.566	8.51223	248.479	207.858	110.089	374.605
TERT	chr5_1294063_1294082_+	145.657	65.3586	5.23516	51.3075	17.6792	50.2874	64.3257	82.7335	6.85253
HSD11B1	chr1_209705009_209705028_+	6.41258	49.9102	324.58	141.929	73.9909	103.533	55.6849	122.099	95.9354
EIF2AK1	chr7_6044595_6044614_-	507.51	73.677	465.929	401.798	639.072	692.191	336.03	391.65	342.626
FZD8	chr10_35640706_35640725_+	1000.36	199.641	691.041	91.2874	118.516	378.635	251.542	352.952	283.238
MARK1	chr1_220599842_220599861_+	354.524	223.408	136.114	223.221	429.54	14.7904	92.6482	192.155	201.007
AAVS1	chr19_55181961_55181980_-	154.818	86.7487	177.995	184.574	297.928	189.317	164.174	173.473	98.2196
PDCD1	chr2_241852703_241852722_-	315.132	253.116	371.696	532.399	285.487	221.856	165.615	264.213	86.7987
AQP2	chr12_49951079_49951098_+	412.237	247.174	214.641	268.532	343.763	346.096	453.64	314.254	235.27
RFC4	chr3_186792918_186792937_+	335.286	528.811	146.584	163.918	30.775	136.072	226.1	112.758	155.324
ADAM33	chr20_3668950_3668969_+	257.419	241.233	104.703	535.064	183.995	263.269	288.025	174.808	123.346
CTSD	chr11_1757396_1757415_+	274.825	726.075	345.52	462.434	809.971	283.976	195.377	467.044	552.771
MLKL	chr16_74691366_74691385_+	150.238	242.421	141.349	32.6502	259.95	159.736	148.813	82.7335	429.425
ALDH2	chr12_111803897_111803916_+	739.279	395.717	282.699	487.755	283.523	147.904	107.529	142.782	66.2411
PADI3	chr1_17266777_17266796_-	120.007	265	20.9406	87.2894	10.4766	73.9521	132.012	144.116	107.356
PRKCQ	chr10_6485185_6485204_-	0	0	52.3516	21.3226	84.4675	20.7066	147.853	56.0453	86.7987
HNF4A	chr20_44424006_44424025_+	249.175	29.7085	5.23516	88.6221	146.672	56.2036	126.731	8.00647	47.9677
SLC7A5	chr16_87869058_87869077_-	14.6573	644.08	151.82	264.534	347.692	340.179	152.173	327.598	248.975
BMX	chrX_15511477_15511496_+	125.503	496.726	261.758	511.076	316.262	221.856	431.078	164.133	415.72
HNRNPK	chr9_83972094_83972113_-	76.9509	692.801	120.409	0	0	76.9101	47.0442	41.3667	2.28418
EDNRA	chr4_147519957_147519976_-	0.916083	85.5604	73.2922	6.66331	7.20265	8.87425	24.9622	70.0566	116.493
ITPR1	chr3_4645449_4645468_+	0.916083	64.1703	26.1758	0	0	0	52.3246	18.6818	2.28418
KCNJ2	chr17_70175701_70175720_-	1.83217	89.1254	319.345	687.654	428.885	133.114	382.114	113.425	164.461
PSMB11	chr14_23042388_23042407_-	463.538	4.75335	83.7625	184.574	282.213	147.904	114.25	45.37	82.2303
MAT2A	chr2_85541883_85541902_-	426.895	149.731	115.173	2.66533	86.4318	2.95808	37.4433	14.6785	18.2734
PRCP	chr11_82838425_82838444_-	245.51	373.138	78.5274	19.3236	0.654787	26.6227	48.4843	122.766	61.6728
HTR1E	chr6_87015615_87015634_-	469.034	1016.03	146.584	145.26	635.798	428.922	483.883	561.787	283.238
PSMD14	chr2_161371175_161371194_-	115.426	0	73.2922	65.9668	45.1803	133.114	92.1681	16.6801	29.6943
CA2	chr8_85465326_85465345_-	12.8252	226.973	455.459	320.505	271.736	357.928	242.421	311.585	399.731
PSMF1	chr20_1135118_1135137_+	176.804	58.2286	73.2922	72.6301	248.819	103.533	43.6839	150.788	73.0936
SCN1A	chr2_166039457_166039476_-	451.629	355.313	240.817	196.568	149.946	366.802	356.671	462.373	440.846
CASP9	chr1_15506900_15506919_-	217.112	78.4303	455.459	156.588	149.291	177.485	530.927	473.049	509.371
GHRHR	chr7_30968844_30968863_-	6.41258	191.323	73.2922	289.854	377.157	195.233	105.129	257.541	98.2196
NDUFAF1	chr15_41395014_41395033_-	445.216	158.049	47.1164	44.6442	0	62.1197	44.6439	88.0711	59.3886
GBA	chr1_155238209_155238228_-	194.21	134.282	10.4703	43.3115	291.38	65.0778	154.094	59.3813	73.0936
CYP11B1	chr8_142877152_142877171_-	43.0559	503.856	214.641	230.551	285.487	408.215	362.912	212.171	463.688
HTR3D	chr3_184038213_184038232_-	73.2866	455.134	109.938	109.278	153.22	50.2874	84.9675	128.771	299.227
PSMA3	chr14_58252216_58252235_+	416.818	229.349	219.877	399.133	462.279	189.317	396.515	193.49	95.9354
EPHB2	chr1_22896451_22896470_+	147.489	249.551	99.468	433.115	356.859	210.024	213.139	335.604	244.407
LRRK2	chr12_40251328_40251347_+	301.391	645.268	162.29	212.56	20.9532	94.6586	73.4465	195.491	95.9354
ITGA2	chr5_53065937_53065956_-	30.2307	0	83.7625	99.9497	16.3697	139.03	39.3635	144.116	292.375
TDO2	chr4_155908933_155908952_-	589.041	350.56	151.82	140.596	157.149	298.766	144.973	286.898	191.871
EHMT1	chr9_137716795_137716814_+	213.447	144.977	83.7625	217.89	57.6212	115.365	110.89	129.438	155.324
P2RY2	chr11_73234424_73234443_+	574.384	16.6367	219.877	35.9819	70.0622	174.527	90.728	118.095	340.342
SCN4A	chr17_63941799_63941818_+	498.349	143.789	73.2922	44.6442	151.911	8.87425	4.80042	192.822	246.691
TOP2A	chr17_40413235_40413254_-	258.335	0	83.7625	8.66231	0	112.407	30.2427	41.3667	66.2411
IKBKB	chr8_42290238_42290257_+	60.4615	882.936	94.2328	377.81	299.238	162.695	144.973	217.509	246.691
MAS1	chr6_159907451_159907470_-	173.14	3.56502	83.7625	271.197	584.07	130.156	287.545	123.433	93.6512
PRKD2	chr19_46713937_46713956_-	6.41258	327.981	450.224	124.604	56.9664	239.605	182.896	77.3959	125.63
AAVS1	chr19_55239261_55239280_-	907.838	785.492	492.105	580.375	423.647	585.7	180.496	502.406	637.285
STK3	chr8_98579680_98579699_-	3.66433	174.686	104.703	25.3206	636.453	47.3293	140.172	70.0566	191.871
GLS	chr2_190881342_190881361_+	662.328	71.3003	298.404	179.909	276.32	195.233	229.46	340.275	173.597
XPNPEP3	chr22_40886374_40886393_+	258.335	39.2152	198.936	130.601	137.505	68.0359	144.013	220.845	418.004
IL13	chr5_132660184_132660203_-	352.692	242.421	172.76	209.894	388.288	283.976	191.537	288.9	338.058
ITPKB	chr1_226737290_226737309_+	9.16083	1.18834	125.644	136.598	111.314	103.533	89.7679	80.0647	2.28418
GRM1	chr6_146398861_146398880_-	1.83217	14.2601	62.8219	97.9507	0.654787	53.2455	57.125	148.12	347.195
PLD2	chr17_4808085_4808104_+	164.895	73.677	151.82	47.3095	338.525	150.862	177.616	41.3667	157.608
CARM1	chr19_10871827_10871846_+	32.0629	1.18834	157.055	87.9557	0.654787	2.95808	39.3635	72.0582	114.209
SOST	chr17_43755474_43755493_+	658.663	351.748	266.993	387.805	227.866	420.048	384.034	417.671	173.597
PLD1	chr3_171605388_171605407_+	95.2726	71.3003	214.641	115.942	51.0734	127.198	151.693	101.415	109.64
SNCA	chr4_89822351_89822370_-	21.0699	143.789	230.347	153.923	328.048	369.76	292.346	139.446	269.533
IL9	chr5_135895700_135895719_-	6.41258	292.331	99.468	274.529	226.556	346.096	222.26	169.47	205.576
GABRA2	chr4_46305591_46305610_-	370.097	5.94169	36.6461	81.9588	128.338	41.4132	335.55	48.0388	2.28418
MAPKAPK2	chr1_206730071_206730090_-	134.664	0	41.8813	117.941	33.3941	14.7904	34.083	75.3942	6.85253
NEK2	chr1_211670298_211670317_-	0.916083	33.2735	0	1.33266	35.3585	68.0359	82.0872	48.706	59.3886
DRD2	chr11_113415477_113415496_+	80.6153	602.488	235.582	347.825	496.983	357.928	311.547	617.165	481.961
TIE1	chr1_43319327_43319346_+	152.986	440.874	68.0571	233.882	306.44	35.497	120.491	51.3748	20.5576
CHRNA3	chr15_78601717_78601736_+	0.916083	27.3318	73.2922	149.258	1.30957	100.575	63.8456	82.0663	20.5576
PIK3CA	chr3_179210539_179210558_+	94.3565	91.5021	157.055	101.282	58.276	62.1197	98.8887	141.448	221.565
CDK17	chr12_96298870_96298889_-	9.16083	0	20.9406	130.601	161.732	59.1616	24.9622	70.0566	68.5253
GABBR2	chr9_98306123_98306142_+	275.741	0	136.114	93.2864	178.102	275.102	213.619	326.264	107.356
ITGA5	chr12_54405319_54405338_-	1.83217	158.049	136.114	247.209	300.547	349.054	339.39	230.186	324.353
PSMD2	chr3_184301934_184301953_+	147.489	0	5.23516	33.9829	2.61915	8.87425	24.9622	50.7076	342.626
STK4	chr20_44978447_44978466_-	317.881	262.623	47.1164	1.99899	17.0245	56.2036	48.0042	115.427	132.482
PRMT6	chr1_107057394_107057413_-	1.83217	368.385	240.817	0	0	38.4551	54.7248	0	45.6835
P2RY14	chr3_151213770_151213789_-	3.66433	43.9685	251.288	100.616	70.717	94.6586	70.5662	96.0776	171.313
MTOR	chr1_11241633_11241652_+	162.147	0	120.409	0	1.30957	156.778	110.89	34.6947	6.85253
NR1H2	chr19_50379079_50379098_+	367.349	398.093	502.575	194.569	151.256	479.209	533.807	556.449	1107.83
GABBR2	chr9_98541961_98541980_-	4.58041	4.75335	104.703	263.201	140.124	334.263	495.404	196.826	180.45
NOTCH3	chr19_15187308_15187327_-	394.832	303.026	387.402	210.561	269.772	272.144	99.3688	230.186	392.878
SGMS1	chr10_50311362_50311381_-	504.762	185.381	287.934	179.243	360.133	201.15	337.47	234.189	182.734
ITGB5	chr3_124848334_124848353_-	332.538	191.323	319.345	317.174	113.933	316.515	387.874	168.136	278.669
CCR5	chr3_46374827_46374846_+	1003.11	1473.54	434.518	419.122	828.96	452.587	546.288	507.076	326.637
SLC10A2	chr13_103066052_103066071_-	17.4056	139.036	225.112	312.509	86.4318	50.2874	64.3257	103.417	132.482
DPP9	chr19_4695372_4695391_+	161.231	136.659	68.0571	138.597	9.8218	141.988	122.891	38.6979	340.342
CXCL10	chr4_76022765_76022784_+	461.706	469.394	146.584	337.164	379.776	183.401	228.98	216.175	178.166
CDS1	chr4_84643055_84643074_-	82.4474	438.497	198.936	111.944	110.659	124.239	188.657	166.801	89.0829
IDH1	chr2_208242055_208242074_-	3.66433	440.874	0	245.21	146.017	32.5389	90.728	52.7092	93.6512
CCL11	chr17_34287126_34287145_-	131	2.37668	130.879	209.228	70.0622	53.2455	122.891	77.3959	239.838
F2RL3	chr19_16889854_16889873_-	272.077	350.56	335.05	267.865	489.78	369.76	379.233	502.406	856.566
ECT2	chr3_172784753_172784772_+	218.944	0	177.995	56.6382	93.6345	11.8323	56.645	46.7044	212.428
P2RY6	chr11_73296567_73296586_-	3.66433	4.75335	141.349	25.3206	108.04	100.575	180.496	70.7238	54.8202
CYP2B6	chr19_41004155_41004174_-	264.748	135.471	125.644	158.587	129.648	236.647	326.429	256.207	59.3886
ECE1	chr1_21238157_21238176_+	63.2097	465.829	177.995	259.203	128.338	360.886	455.56	218.843	93.6512
SSTR4	chr20_23036162_23036181_-	153.902	224.596	282.699	164.584	143.398	168.611	280.825	201.496	242.123
EGLN3	chr14_33931166_33931185_-	9.16083	393.34	162.29	315.175	419.063	455.545	206.418	208.835	347.195
POLE	chr12_132668867_132668886_+	336.202	255.493	104.703	0	0.654787	17.7485	18.7217	16.6801	75.3778
GGPS1	chr1_235342329_235342348_+	384.755	483.654	146.584	1.33266	17.0245	20.7066	65.2858	55.3781	111.925
ENG	chr9_127818305_127818324_+	20.1538	1.18834	350.756	223.887	165.661	257.353	180.016	238.192	194.155
MC5R	chr18_13825861_13825880_-	844.628	221.031	345.52	349.158	316.262	221.856	148.333	312.252	529.929
INPPL1	chr11_72230222_72230241_+	103.517	373.138	418.813	98.617	191.852	150.862	78.7269	99.4136	118.777
ACVR1C	chr2_157556207_157556226_+	349.028	278.071	298.404	247.209	10.4766	85.7844	199.698	238.192	593.886
NR1H3	chr11_47260503_47260522_+	66.874	230.538	230.347	228.552	320.845	136.072	235.221	266.882	214.713
SLC6A3	chr5_1416188_1416207_-	76.0349	240.044	219.877	211.227	528.413	337.221	218.899	397.655	98.2196
ADH1B	chr4_99318130_99318149_+	765.845	581.098	314.109	930.199	781.16	420.048	435.398	348.281	244.407
NR1I3	chr1_161231340_161231359_+	86.1118	101.009	88.9977	379.809	118.516	76.9101	127.211	208.835	491.098
MAP3K14	chr17_45274147_45274166_-	256.503	109.327	73.2922	11.994	14.4053	127.198	14.4013	98.7464	95.9354
DYRK4	chr12_4596646_4596665_+	0.916083	83.1837	125.644	106.613	16.3697	65.0778	135.852	70.0566	89.0829
BRD4	chr19_15265481_15265500_-	33.8951	617.936	162.29	42.6452	136.85	346.096	283.705	338.273	146.187
OPRM1	chr6_154039659_154039678_+	245.51	106.95	376.931	339.163	404.003	322.431	349.951	272.22	296.943
TOP2B	chr3_25633953_25633972_-	100.769	26.1434	355.991	257.87	81.1935	156.778	152.173	153.457	340.342
PTK2B	chr8_27430914_27430933_+	434.223	471.77	387.402	389.138	475.375	263.269	180.016	154.124	292.375
PTGS2	chr1_186678306_186678325_+	8.24474	0	15.7055	62.6352	39.2872	65.0778	29.7626	32.0259	11.4209
DDR2	chr1_162761341_162761360_-	2.74825	28.5201	329.815	337.164	619.428	159.736	187.217	297.574	312.932
BIRC5	chr17_78214710_78214729_-	122.755	217.466	125.644	35.9819	9.16701	32.5389	10.5609	29.357	4.56835
GJC2	chr1_228158561_228158580_-	10.0769	11.8834	214.641	215.891	352.275	538.371	422.437	133.441	29.6943
PTGS2	chr1_186676571_186676590_+	138.328	657.151	83.7625	135.932	96.9084	103.533	99.8488	208.835	121.061
TP53	chr17_7675054_7675073_-	270.244	147.354	88.9977	381.808	229.175	706.982	541.008	358.957	520.792
IL13	chr5_132659745_132659764_-	525.831	314.91	209.406	1022.15	1040.46	278.06	241.461	166.801	244.407
PDE1B	chr12_54572694_54572713_-	102.601	165.179	47.1164	186.573	96.2536	38.4551	55.2049	53.3765	27.4101
GLRA3	chr4_174728629_174728648_+	215.279	4.75335	308.874	253.206	327.393	245.521	401.315	350.283	306.08
FGF23	chr12_4372672_4372691_+	219.86	0	115.173	139.93	45.8351	79.8682	120.971	103.417	29.6943
PTPRM	chr18_7888265_7888284_+	108.098	0	130.879	125.27	51.7281	174.527	94.0883	138.779	98.2196
TLR7	chrX_12885752_12885771_-	322.461	509.797	157.055	325.17	208.222	212.982	126.731	138.779	331.206
CASP14	chr19_15053806_15053825_+	544.153	238.856	47.1164	147.926	82.5031	127.198	383.074	48.0388	45.6835
MMP2	chr16_55485614_55485633_+	12.8252	297.085	204.171	189.904	493.054	337.221	285.145	238.86	66.2411
SCN1A	chr2_166012173_166012192_-	1.83217	0	130.879	49.9749	195.126	168.611	192.497	61.3829	82.2303
FAAH	chr1_46405470_46405489_-	3.66433	58.2286	272.228	123.938	263.224	79.8682	169.935	143.449	89.0829
KCNN1	chr19_17985380_17985399_-	802.488	222.219	287.934	141.929	135.541	269.185	60.4853	108.087	203.292
GSTP1	chr11_67584565_67584584_-	96.1887	45.1569	539.221	287.855	1369.16	215.94	154.094	318.257	214.713
BIRC5	chr17_78214734_78214753_-	186.881	20.2018	5.23516	180.576	4.58351	8.87425	0	63.3845	13.7051
PRMT3	chr11_20392941_20392960_-	147.489	26.1434	62.8219	71.2975	125.064	133.114	244.342	116.761	61.6728
CACNA1H	chr16_1217924_1217943_+	443.384	73.677	94.2328	155.255	91.6701	130.156	160.334	300.91	84.5145
ARG1	chr6_131581304_131581323_+	32.0629	623.878	204.171	520.405	390.253	118.323	157.454	262.212	315.216
TPH2	chr12_71978997_71979016_-	602.782	426.614	539.221	60.6362	33.3941	85.7844	76.8068	168.136	105.072
SLC18A2	chr10_117270154_117270173_-	0	0	120.409	285.19	439.362	180.443	129.611	98.7464	146.187
IDE	chr10_92508124_92508143_-	4.58041	2.37668	141.349	169.915	183.995	70.994	106.089	124.767	130.198
GABRA4	chr4_46971078_46971097_+	52.2167	40.4035	78.5274	38.6472	5.23829	44.3712	19.2017	53.3765	125.63
FBP1	chr9_94609954_94609973_+	491.936	169.932	387.402	201.232	288.761	189.317	136.332	280.226	251.259
SLC6A5	chr11_20601612_20601631_-	1049.83	459.887	392.637	734.297	428.885	1283.81	1043.13	892.721	650.99
AAVS1	chr19_55149740_55149759_-	610.111	404.035	528.751	320.505	443.291	133.114	198.257	232.188	185.018
ROSA26	chr3_9376498_9376517_-	686.146	3.56502	120.409	86.6231	158.458	94.6586	96.4885	109.422	2.28418
PTK2	chr8_140744653_140744672_-	231.769	71.3003	5.23516	29.9849	187.924	112.407	87.8478	110.756	86.7987
SLC18A2	chr10_117266741_117266760_-	0	86.7487	219.877	245.21	142.743	56.2036	29.7626	100.748	118.777
IL1B	chr2_112833509_112833528_+	237.265	0	20.9406	66.6331	361.442	97.6167	51.3645	240.861	141.619
GSTP1	chr11_67585178_67585197_+	11.9091	213.901	68.0571	103.948	155.184	165.653	197.297	93.4088	9.1367
ITGA2B	chr17_44384317_44384336_+	36.6433	589.416	225.112	142.595	160.423	251.437	271.704	199.494	269.533
ROSA26	chr3_9382610_9382629_-	0	0	5.23516	55.9718	32.0845	35.497	24.9622	0	22.8418
MAPK12	chr22_50256147_50256166_-	541.405	166.367	198.936	370.48	357.514	233.689	196.337	348.949	127.914
CD86	chr3_122118046_122118065_+	109.93	203.206	157.055	51.9738	0	85.7844	53.7647	19.349	2.28418
CHRNA3	chr15_78601936_78601955_+	1211.06	380.268	57.5867	209.228	565.081	162.695	112.81	211.504	230.702
CD28	chr2_203726876_203726895_-	1.83217	130.717	0	20.6563	41.2516	11.8323	19.2017	12.0097	29.6943
IL17A	chr6_52187701_52187720_-	96.1887	606.053	266.993	485.756	330.012	384.551	574.131	406.995	269.533
PLD2	chr17_4809334_4809353_-	116.343	10.695	88.9977	125.937	2.61915	23.6647	68.166	4.67044	216.997
SSTR5	chr16_1079160_1079179_-	957.306	960.178	324.58	253.206	471.446	653.736	815.592	510.412	280.954
CDK2	chr12_55968154_55968173_-	385.671	87.9371	204.171	135.265	537.58	47.3293	15.3614	124.1	411.152
LAP3	chr4_17606825_17606844_+	8.24474	105.762	109.938	194.569	126.374	141.988	110.89	112.758	43.3993
CYP1A1	chr15_74721219_74721238_+	7.32866	135.471	157.055	121.939	360.133	121.281	152.173	36.6963	239.838
SLC27A1	chr19_17488931_17488950_-	263.832	360.067	659.63	326.502	102.802	544.287	288.986	443.025	833.724
C6	chr5_41201590_41201609_+	7.32866	240.044	88.9977	35.3156	19.6436	248.479	137.292	145.451	276.385
MCHR2	chr6_99947866_99947885_-	302.307	200.829	136.114	225.22	0	337.221	403.236	262.212	262.68
FURIN	chr15_90878895_90878914_+	508.426	8.31837	57.5867	185.906	0.654787	283.976	159.854	33.3603	189.587
CNGA3	chr2_98396831_98396850_+	208.867	224.596	324.58	153.923	92.3249	106.491	64.8057	136.777	18.2734
DYRK2	chr12_67657188_67657207_+	381.09	2.37668	36.6461	81.9588	0.654787	68.0359	39.8435	132.107	66.2411
CA14	chr1_150262529_150262548_-	49.4685	0	172.76	226.553	56.3117	76.9101	132.012	74.0598	84.5145
PLAT	chr8_42187988_42188007_-	170.391	228.161	130.879	146.593	92.3249	295.808	133.452	286.898	251.259
PDE1C	chr7_31879026_31879045_+	2.74825	68.9236	104.703	85.2904	7.85744	50.2874	81.6072	112.091	223.849
NAE1	chr16_66816582_66816601_-	240.93	2.37668	198.936	82.6251	18.334	106.491	27.8425	268.217	116.493
DRD3	chr3_114159859_114159878_-	213.447	81.9954	41.8813	12.6603	200.365	414.132	263.063	247.533	123.346
ROSA26	chr3_9384719_9384738_-	81.5314	254.304	130.879	0	0	47.3293	37.4433	10.0081	36.5468
ATM	chr11_108299853_108299872_+	294.979	160.426	31.4109	0	0	29.5808	39.8435	24.0194	0
AXL	chr19_41238485_41238504_+	137.412	373.138	303.639	166.583	242.271	428.922	685.981	529.761	253.544
CYP11B2	chr8_142915097_142915116_-	24.7342	225.784	57.5867	79.9598	10.4766	147.904	120.011	62.0501	61.6728
PFKFB3	chr10_6215228_6215247_+	272.077	1.18834	73.2922	117.941	366.681	139.03	215.539	246.866	422.573
TPSAB1	chr16_1241243_1241262_-	352.692	455.134	214.641	253.872	215.425	289.892	276.504	290.902	344.911
NR1D2	chr3_23965102_23965121_-	254.671	124.776	94.2328	215.891	575.557	62.1197	197.297	70.0566	25.1259
TNFSF13B	chr13_108306825_108306844_+	0	0	219.877	260.536	141.434	79.8682	18.7217	34.6947	57.1044
CYP2C9	chr10_94941903_94941922_+	157.566	149.731	177.995	507.745	142.743	153.82	226.1	172.806	497.95
BRDT	chr1_91979686_91979705_-	1.83217	53.4752	94.2328	102.615	229.175	109.449	114.25	128.103	52.536
GP2	chr16_20318341_20318360_-	0	0	115.173	33.9829	34.7037	133.114	238.101	68.055	82.2303
CIAO1	chr2_96268539_96268558_+	268.412	472.959	99.468	241.212	108.695	192.275	263.543	80.0647	201.007
RCE1	chr11_66843822_66843841_-	323.377	526.434	78.5274	174.579	34.7037	417.09	266.424	194.824	427.141
CHRNA7	chr15_32111794_32111813_+	1.83217	0	0	140.596	179.412	29.5808	52.8047	98.0792	2.28418
MMP8	chr11_102718486_102718505_+	108.098	0	151.82	46.6432	204.948	76.9101	23.042	72.0582	130.198
RFC4	chr3_186804595_186804614_-	252.839	713.003	251.288	269.864	937	156.778	236.181	375.637	452.267
CHRNA7	chr15_32158532_32158551_-	4.58041	0	68.0571	2.66533	318.226	26.6227	51.8446	40.0323	52.536
ROSA26	chr3_9384256_9384275_-	181.384	281.636	68.0571	92.6201	202.329	218.898	99.8488	194.157	98.2196
CCR5	chr3_46375764_46375783_-	75.1188	1.18834	15.7055	60.6362	141.434	144.946	149.773	128.103	216.997
EIF4E	chr4_98881126_98881145_-	170.391	0	83.7625	100.616	19.6436	26.6227	4.80042	64.0517	73.0936
SGMS2	chr4_107903320_107903339_+	131.916	570.403	277.463	105.28	38.6324	171.569	208.818	140.78	45.6835
CTSB	chr8_11853334_11853353_-	151.154	2.37668	193.701	375.811	100.837	257.353	84.9675	158.128	93.6512
PMPCA	chr9_136412138_136412157_+	568.887	101.009	209.406	43.9779	0	109.449	72.9664	65.3862	148.471
EGFR	chr7_55155873_55155892_+	163.979	2.37668	193.701	51.3075	0	212.982	176.656	122.099	171.313
ROSA26	chr3_9370190_9370209_-	194.21	1.18834	94.2328	247.209	0	53.2455	56.645	103.417	134.766
NPY2R	chr4_155214632_155214651_-	0	0	5.23516	9.99497	20.9532	82.8263	203.538	132.107	93.6512
CYP2C9	chr10_94949227_94949246_+	178.636	102.197	115.173	73.9628	479.304	248.479	368.673	217.509	274.101
LOXL2	chr8_23319974_23319993_-	50.3845	166.367	188.466	426.452	180.721	482.167	304.827	116.094	269.533
CSNK1G2	chr19_1969896_1969915_+	11.9091	552.577	345.52	249.208	606.987	195.233	387.874	190.154	214.713
AGRP	chr16_67482805_67482824_-	400.328	865.111	235.582	376.477	377.157	482.167	709.023	344.278	477.393
TNFSF14	chr19_6665259_6665278_-	600.95	172.309	371.696	172.58	199.055	198.192	227.54	329.6	91.367
RARB	chr3_25580612_25580631_-	176.804	131.906	78.5274	257.87	176.792	14.7904	85.9276	3.33603	36.5468
PSMA2	chr7_42926556_42926575_-	0	41.5919	20.9406	57.9708	0	8.87425	14.8813	0	95.9354
ADAMTS1	chr21_26841021_26841040_+	87.9439	247.174	57.5867	308.511	386.979	248.479	383.074	88.0711	116.493
CMA1	chr14_24506191_24506210_-	235.433	356.502	246.052	51.3075	113.278	44.3712	48.9643	74.727	89.0829
KLK3	chr19_50856323_50856342_+	338.035	172.309	183.231	524.403	603.713	159.736	236.181	325.596	210.144
CYSLTR2	chr13_48707325_48707344_+	141.993	21.3901	345.52	327.169	71.3717	334.263	299.066	370.299	153.04
HDAC11	chr3_13504218_13504237_+	184.133	338.677	272.228	75.9618	8.51223	141.988	84.4875	148.787	105.072
TMEM199	chr17_28361184_28361203_-	585.377	260.246	366.461	15.3256	1.96436	56.2036	104.169	48.0388	68.5253
NTSR1	chr20_62709663_62709682_+	1360.38	691.613	450.224	480.425	893.129	556.119	620.215	572.462	370.037
TEK	chr9_27192561_27192580_-	153.902	2.37668	68.0571	134.599	252.093	130.156	278.425	152.79	54.8202
AAVS1	chr19_55141051_55141070_-	10.993	8.31837	41.8813	195.901	132.922	286.934	141.612	140.113	100.504
RFC3	chr13_33821152_33821171_-	152.986	198.453	5.23516	43.3115	0	50.2874	44.6439	170.805	70.8095
ABL1	chr9_130872879_130872898_-	103.517	293.52	162.29	41.3125	206.258	2.95808	48.0042	0.667206	111.925
DLX3	chr17_49993581_49993600_-	175.888	197.264	209.406	204.564	321.5	183.401	318.268	230.186	280.954
CDKN1A	chr6_36684261_36684280_+	10.993	5.94169	287.934	245.876	140.124	337.221	251.062	190.154	317.5
CCR5	chr3_46373955_46373974_+	128.252	152.107	120.409	133.266	55.6569	177.485	88.8078	188.819	121.061
CCR3	chr3_46265591_46265610_-	54.0489	1158.63	429.283	393.802	1221.83	417.09	378.753	95.4104	109.64
EGFL7	chr9_136669660_136669679_-	340.783	732.017	622.984	508.411	321.5	597.533	478.602	348.949	429.425
CES1	chr16_55823659_55823678_-	268.412	112.892	188.466	368.481	266.498	159.736	161.294	302.911	207.86
SCNN1G	chr16_23212041_23212060_-	75.1188	98.6321	183.231	211.893	5.23829	177.485	284.665	84.7351	303.795
VIPR1	chr3_42528096_42528115_+	529.496	442.062	382.167	480.425	662.644	328.347	552.049	427.679	376.889
EGFL7	chr9_136670174_136670193_+	184.133	461.075	225.112	114.609	94.2893	97.6167	189.137	218.176	150.756
AVPR1B	chr1_206110413_206110432_+	467.202	292.331	136.114	144.594	89.051	281.018	136.332	234.856	301.511
NEK2	chr1_211675401_211675420_-	3.66433	130.717	198.936	0	50.4186	20.7066	45.604	20.6834	9.1367
EZH1	chr17_42719106_42719125_-	369.181	173.497	115.173	70.6311	70.717	186.359	176.656	178.144	130.198
AAVS1	chr19_55186116_55186135_-	0.916083	105.762	146.584	215.891	132.922	76.9101	200.658	50.0404	207.86
NDUFAF3	chr3_49023071_49023090_-	79.6992	3.56502	104.703	57.9708	0	0	27.8425	38.6979	0
CD52	chr1_26320225_26320244_+	31.1468	412.354	31.4109	103.948	174.173	189.317	273.144	34.0275	86.7987
NARS	chr18_57607580_57607599_-	302.307	13.0717	277.463	0	1.30957	141.988	32.6429	24.6866	41.1152
BCL2L1	chr20_31721749_31721768_-	6.41258	137.847	157.055	41.9789	1.96436	106.491	119.051	194.157	242.123
ATP1A3	chr19_41981956_41981975_+	127.335	961.366	68.0571	404.463	407.277	230.73	222.26	406.995	424.857
PSMA3	chr14_58244920_58244939_+	42.1398	14.2601	261.758	0	43.2159	124.239	43.2038	66.7206	25.1259
NUAK1	chr12_106138431_106138450_-	757.6	581.098	345.52	208.562	383.705	529.497	278.905	425.01	740.073
STK17A	chr7_43583369_43583388_+	144.741	199.641	136.114	144.594	49.7638	369.76	305.307	168.136	374.605
ERAP2	chr5_96883842_96883861_-	155.734	261.434	298.404	185.906	381.086	174.527	108.49	115.427	77.662
P2RY14	chr3_151213845_151213864_+	172.224	80.807	136.114	65.3005	3.27393	68.0359	134.412	24.6866	513.94
ITGAL	chr16_30499380_30499399_+	57.7132	215.089	429.283	144.594	153.22	79.8682	71.0463	62.0501	109.64
TESK1	chr9_35607603_35607622_-	116.343	269.753	198.936	720.304	515.317	257.353	381.154	325.596	367.752
TYMP	chr22_50527256_50527275_-	553.314	172.309	15.7055	21.3226	0	35.497	37.4433	2.66882	25.1259
SLC12A4	chr16_67954738_67954757_-	221.692	1.18834	188.466	175.911	190.543	198.192	40.3236	118.095	148.471
ROSA26	chr3_9366442_9366461_-	272.077	74.8653	52.3516	39.9799	0	35.497	45.604	106.086	66.2411
SLC5A2	chr16_31485767_31485786_+	229.021	486.03	450.224	177.244	99.5276	112.407	66.2458	188.819	98.2196
KCNC4	chr1_110223349_110223368_-	204.286	379.08	272.228	43.3115	3.92872	212.982	229.94	62.7173	84.5145
GUCY1A2	chr11_106939991_106940010_+	116.343	211.524	78.5274	97.2844	693.419	278.06	123.371	134.108	207.86
GALR1	chr18_77250930_77250949_-	119.091	14.2601	209.406	82.6251	386.324	662.61	534.287	350.95	529.929
HNMT	chr2_137970190_137970209_+	0.916083	0	62.8219	79.2934	0.654787	91.7006	163.694	80.7319	98.2196
KCNC2	chr12_75051141_75051160_+	126.419	1.18834	57.5867	175.245	317.572	106.491	148.813	88.7383	91.367
ATAD2	chr8_123359586_123359605_+	233.601	293.52	141.349	170.581	102.147	41.4132	110.41	40.0323	27.4101
MAOB	chrX_43781477_43781496_+	249.175	9.50671	408.342	133.266	36.0133	245.521	161.294	236.191	429.425
GRIA2	chr4_157336609_157336628_-	1375.96	468.205	539.221	399.799	237.033	556.119	380.674	657.865	509.371
SLC16A7	chr12_59775314_59775333_-	0	99.8204	62.8219	9.32864	66.7882	91.7006	55.6849	30.0243	2.28418
HCN4	chr15_73367891_73367910_-	701.719	484.842	157.055	253.206	195.781	165.653	336.51	213.506	178.166
POLR2C	chr16_57469213_57469232_-	4.58041	375.515	219.877	49.3085	96.2536	14.7904	61.9255	32.0259	0
APLNR	chr11_57236366_57236385_+	174.972	437.309	256.523	69.2985	71.3717	248.479	156.014	99.4136	182.734
SLAMF7	chr1_160748389_160748408_-	76.0349	615.559	272.228	561.051	245.545	354.97	317.788	433.016	370.037
TLR8	chrX_12919795_12919814_+	231.769	38.0268	329.815	347.159	339.179	473.293	446.919	604.488	203.292
NDUFA6	chr22_42090620_42090639_-	12.8252	168.744	125.644	0	0	0	18.7217	9.34088	118.777
HIF1A	chr14_61734173_61734192_+	133.748	133.094	225.112	212.56	174.828	44.3712	29.7626	72.7254	100.504
KDM4E	chr11_95026328_95026347_+	0.916083	0	52.3516	51.9738	235.723	227.772	111.37	48.706	27.4101
TBK1	chr12_64464375_64464394_-	10.993	0	125.644	40.6462	73.3361	94.6586	79.207	143.449	116.493
DEPTOR	chr8_119928557_119928576_+	143.825	51.0986	94.2328	275.861	330.667	405.257	442.599	329.6	248.975
BCHE	chr3_165830353_165830372_-	299.559	120.022	26.1758	231.883	328.703	73.9521	129.611	242.196	127.914
TYK2	chr19_10368366_10368385_+	70.5384	527.622	41.8813	102.615	198.4	162.695	179.536	248.2	70.8095
PSMB11	chr14_23042778_23042797_-	772.258	211.524	591.573	998.164	1067.3	360.886	406.116	466.377	511.655
VEGFA	chr6_43777623_43777642_+	12.8252	314.91	78.5274	475.094	355.549	183.401	303.867	44.7028	109.64
KCNQ4	chr1_40818543_40818562_-	380.174	275.695	335.05	810.259	567.045	387.509	208.338	491.063	326.637
DNMT1	chr19_10140238_10140257_-	824.474	152.107	246.052	48.6422	0	14.7904	20.6418	8.00647	0
LSS	chr21_46215738_46215757_-	419.566	341.053	225.112	244.544	352.93	352.012	327.869	166.801	399.731
PSMC3	chr11_47420387_47420406_-	139.245	142.601	5.23516	0.666331	0	62.1197	113.77	3.33603	22.8418
BRD2	chr6_GL000254v2_alt_4273720_4273739_+	0.916083	172.309	15.7055	66.6331	74.6457	29.5808	89.7679	29.357	6.85253
CCR2	chr3_46358004_46358023_+	267.496	3.56502	544.456	301.848	40.5968	79.8682	204.498	95.4104	299.227
MAP3K2	chr2_127326769_127326788_+	765.845	623.878	314.109	185.906	341.799	301.724	183.376	247.533	315.216
ALOX12	chr17_7000378_7000397_+	327.958	134.282	397.872	789.603	659.37	230.73	294.746	216.175	111.925
P2RY2	chr11_73234363_73234382_+	0	2.37668	0	5.99698	14.4053	38.4551	26.8824	35.3619	59.3886
ACE2	chrX_15587822_15587841_-	8.24474	17.8251	141.349	378.476	562.462	417.09	352.831	352.952	299.227
AVPR2	chrX_153905837_153905856_-	94.3565	156.861	136.114	424.453	372.574	76.9101	234.261	167.469	278.669
ADCYAP1R1	chr7_31078077_31078096_+	64.1258	34.4618	83.7625	240.546	133.576	65.0778	38.4034	166.134	61.6728
CCND1	chr11_69643018_69643037_+	207.951	327.981	230.347	106.613	0	73.9521	21.1219	32.6931	0
KDR	chr4_55096230_55096249_-	184.133	3.56502	444.988	157.254	43.2159	144.946	168.015	130.105	171.313
TUBB8	chr10_48812_48831_-	322.461	244.798	94.2328	253.872	235.723	82.8263	28.3225	72.0582	52.536
TNFSF14	chr19_6670003_6670022_-	544.153	891.254	335.05	137.264	225.901	141.988	241.461	168.136	178.166
SLC17A9	chr20_62960590_62960609_-	334.37	563.273	10.4703	127.269	297.273	100.575	188.657	42.7012	38.831
ELANE	chr19_KI270868v1_alt_31777_31796_-	171.307	207.959	130.879	288.521	184.65	85.7844	347.551	166.134	116.493
TXK	chr4_48073972_48073991_+	0.916083	0	0	123.938	8.51223	38.4551	98.4087	46.7044	134.766
RRM2	chr2_10123025_10123044_-	93.4404	408.788	130.879	19.3236	43.8707	100.575	114.25	194.824	221.565
GSR	chr8_30689312_30689331_-	3.66433	22.5784	162.29	197.9	63.5143	195.233	184.816	126.769	162.177
KCNS3	chr2_17931362_17931381_+	100.769	129.529	157.055	149.925	114.588	147.904	182.416	285.564	571.044
KCNK9	chr8_139618721_139618740_-	237.265	373.138	136.114	217.224	238.997	174.527	176.656	158.795	237.554
MAPK15	chr8_143718783_143718802_+	68.7062	128.341	115.173	19.9899	140.124	68.0359	43.6839	126.102	219.281
IL4R	chr16_27344941_27344960_+	1.83217	169.932	157.055	47.3095	147.327	26.6227	18.7217	72.7254	57.1044
PDE6C	chr10_93640139_93640158_+	217.112	0	109.938	275.195	28.1558	266.227	342.75	396.32	310.648
AAVS1	chr19_55226953_55226972_+	173.14	83.1837	141.349	19.3236	11.7862	68.0359	65.2858	186.15	93.6512
BCAT2	chr19_48799795_48799814_+	345.363	80.807	649.16	314.508	204.948	257.353	252.982	258.209	363.184
PLK3	chr1_44803277_44803296_-	187.797	184.192	256.523	460.435	441.326	186.359	224.18	295.572	219.281
ROSA26	chr3_9366332_9366351_-	120.007	124.776	157.055	23.3216	3.92872	133.114	204.498	86.7367	230.702
EHMT1	chr9_137743455_137743474_+	0	0	0	2.66533	0.654787	201.15	142.093	18.6818	114.209
CDC42BPB	chr14_102968598_102968617_-	166.727	8.31837	73.2922	110.611	155.839	76.9101	25.4422	70.0566	61.6728
MLYCD	chr16_83899549_83899568_-	92.5244	84.372	5.23516	39.3136	319.536	159.736	303.387	304.246	219.281
ROSA26	chr3_9378078_9378097_-	16.4895	284.013	109.938	119.94	180.721	479.209	304.827	230.186	102.788
GART	chr21_33528267_33528286_+	190.545	0	162.29	8.66231	79.884	85.7844	40.3236	136.11	198.723
PRKD1	chr14_29597704_29597723_-	2.74825	158.049	88.9977	195.235	125.064	79.8682	102.729	98.7464	171.313
GJD3	chr17_40363531_40363550_+	1200.98	215.089	560.162	149.925	288.106	375.676	210.739	252.871	536.781
EHMT2	chr6_GL000250v2_alt_3215566_3215585_+	10.993	398.093	109.938	13.3266	52.3829	141.988	363.872	111.423	84.5145
KCNG3	chr2_42444135_42444154_+	340.783	0	15.7055	159.92	96.2536	115.365	45.604	48.706	100.504
IRAK3	chr12_66244557_66244576_-	556.978	0	120.409	190.571	36.0133	35.497	24.4822	53.3765	123.346
PRKD3	chr2_37274444_37274463_+	80.6153	197.264	256.523	263.867	56.9664	248.479	97.9286	91.4072	244.407
PSMA4	chr15_78544899_78544918_-	287.65	19.0134	109.938	132.6	98.218	405.257	150.253	104.084	93.6512
STK10	chr5_172187884_172187903_+	0	143.789	172.76	72.6301	184.65	94.6586	112.81	214.84	100.504
NTRK1	chr1_156868122_156868141_-	222.608	0	130.879	118.607	99.5276	23.6647	84.9675	126.102	388.31
RYR3	chr15_33768677_33768696_-	139.245	3.56502	52.3516	125.937	0.654787	186.359	142.573	231.52	203.292
MUSK	chr9_110787768_110787787_+	2.74825	101.009	120.409	225.22	146.017	144.946	190.097	507.076	244.407
AQP10	chr1_154323036_154323055_-	756.684	610.806	115.173	211.893	32.0845	381.593	226.1	146.118	516.224
PCSK4	chr19_1487229_1487248_+	229.937	310.156	204.171	145.927	155.184	106.491	161.774	226.183	22.8418
SLK	chr10_103992602_103992621_-	153.902	180.627	0	82.6251	0	150.862	315.868	230.853	43.3993
RAD51	chr15_40706213_40706232_-	5.4965	87.9371	94.2328	0	0	14.7904	18.2416	2.66882	11.4209
AOC3	chr17_42852817_42852836_-	306.888	178.251	492.105	370.48	572.284	103.533	88.3278	206.167	365.468
NOTCH2	chr1_119925383_119925402_+	0	2.37668	68.0571	77.9608	334.596	171.569	128.651	286.231	75.3778
SGK1	chr6_134170824_134170843_+	3.66433	112.892	130.879	245.21	222.627	266.227	208.338	150.788	63.9569
SLC9A5	chr16_67255094_67255113_+	2.74825	78.4303	94.2328	35.9819	0	11.8323	2.88025	25.3538	6.85253
NDUFB4	chr3_120596431_120596450_+	49.4685	120.022	5.23516	62.6352	30.775	29.5808	23.5221	44.0356	22.8418
GPR55	chr2_230910806_230910825_-	1.83217	7.13003	167.525	286.522	286.797	144.946	148.333	100.748	102.788
CHRNA10	chr11_3667626_3667645_+	298.643	95.0671	335.05	16.6583	36.6681	266.227	311.547	113.425	70.8095
NRAS	chr1_114716051_114716070_-	141.077	146.166	193.701	54.6392	0	50.2874	63.8456	6.67206	18.2734
CDK2	chr12_55969519_55969538_+	25.6503	65.3586	31.4109	84.6241	44.5255	47.3293	134.892	75.3942	47.9677
ROSA26	chr3_9372620_9372639_-	3.66433	70.112	62.8219	69.9648	30.775	106.491	177.616	11.3425	45.6835
LTB	chr6_GL000254v2_alt_2923507_2923526_-	134.664	128.341	62.8219	131.267	0	23.6647	61.9255	36.0291	109.64
EGFL7	chr9_136669927_136669946_-	395.748	202.018	314.109	105.28	760.862	127.198	215.059	267.549	315.216
FFAR2	chr19_35449986_35450005_+	426.895	93.8788	361.226	225.22	440.671	180.443	193.457	314.921	386.026
AAVS1	chr19_55145545_55145564_-	16.4895	8.31837	277.463	193.902	192.507	109.449	59.0452	78.0631	139.335
HPGD	chr4_174522038_174522057_-	30.2307	0	52.3516	122.605	47.1446	41.4132	68.6461	114.092	73.0936
NDUFS8	chr11_68033152_68033171_-	58.6293	298.273	125.644	33.9829	50.4186	41.4132	56.165	24.0194	36.5468
CSNK1G2	chr19_1978633_1978652_-	469.95	400.47	345.52	440.445	440.671	366.802	396.515	326.264	283.238
CHRNA2	chr8_27467287_27467306_+	65.958	86.7487	88.9977	83.2914	91.6701	38.4551	71.0463	237.525	203.292
ADGRG3	chr16_57685890_57685909_-	1.83217	156.861	120.409	121.939	169.59	88.7425	84.9675	246.199	15.9892
IFNG	chr12_68158001_68158020_-	302.307	224.596	94.2328	93.2864	242.271	236.647	108.01	136.11	155.324
C3AR1	chr12_8059868_8059887_+	286.734	55.8519	141.349	244.544	278.284	210.024	107.049	226.85	153.04
CHRNB4	chr15_78629891_78629910_+	796.076	142.601	272.228	143.261	206.913	171.569	62.8855	173.473	155.324
RAB27A	chr15_55230411_55230430_-	4.58041	62.9819	26.1758	42.6452	65.4787	65.0778	181.936	128.771	127.914
SPP1	chr4_87982518_87982537_+	310.552	139.036	251.288	278.527	436.743	239.605	157.454	125.435	269.533
SRPK3	chrX_153784163_153784182_-	161.231	39.2152	177.995	367.149	485.852	224.814	200.178	220.845	584.749
PLK3	chr1_44803014_44803033_-	161.231	60.6053	104.703	48.6422	1.30957	88.7425	218.899	141.448	267.249
CYP17A1	chr10_102834956_102834975_+	229.937	78.4303	345.52	310.51	732.051	127.198	136.812	485.726	228.418
CALCRL	chr2_187380766_187380785_-	200.622	204.394	130.879	195.235	241.616	56.2036	89.2879	71.391	351.763
ROSA26	chr3_9376621_9376640_-	2.74825	58.2286	41.8813	265.866	170.245	50.2874	50.4044	107.42	95.9354
SLC15A2	chr3_121913041_121913060_-	79.6992	494.349	371.696	61.3025	0	23.6647	66.7259	37.3635	381.457
PDGFB	chr22_39231773_39231792_-	526.748	457.51	560.162	407.128	579.486	875.592	583.251	502.406	386.026
TGFB1	chr19_41341992_41342011_+	295.895	1.18834	261.758	367.815	276.975	337.221	387.394	361.625	228.418
JAK3	chr19_17835081_17835100_+	87.9439	35.6502	73.2922	91.2874	39.942	177.485	148.813	40.0323	9.1367
FPR1	chr19_51746554_51746573_-	623.852	192.511	177.995	137.931	232.449	298.766	316.348	235.524	472.824
CDK13	chr7_39951508_39951527_-	1.83217	310.156	5.23516	39.3136	26.8463	91.7006	54.7248	52.7092	31.9785
ACVR1	chr2_157780482_157780501_+	113.594	131.906	272.228	233.216	133.576	227.772	194.897	276.89	370.037
TBXA2R	chr19_3599979_3599998_-	277.573	759.348	675.335	754.287	693.419	881.509	622.615	392.984	1105.54
GJB3	chr1_34784946_34784965_-	65.0419	647.645	303.639	159.253	43.2159	130.156	228.5	276.223	223.849
CSNK1G3	chr5_123575942_123575961_+	0	0	0	85.9567	47.1446	32.5389	55.6849	8.67367	45.6835
ADAM33	chr20_3671278_3671297_+	4.58041	456.322	41.8813	113.276	105.421	106.491	108.97	174.141	491.098
ATP1A1	chr1_116389699_116389718_-	218.028	193.699	225.112	135.932	0	97.6167	58.0851	181.48	57.1044
GJB4	chr1_34761716_34761735_+	416.818	377.892	115.173	185.24	335.906	278.06	317.308	189.486	344.911
SENP1	chr12_48045360_48045379_-	644.922	23.7668	141.349	75.2954	170.899	257.353	214.579	237.525	100.504
NPR2	chr9_35800079_35800098_+	80.6153	1.18834	109.938	269.864	18.9888	242.563	216.019	216.175	118.777
PMVK	chr1_154926387_154926406_+	161.231	0	136.114	39.9799	0.654787	212.982	194.417	248.2	153.04
NDUFAF1	chr15_41396970_41396989_+	125.503	190.134	125.644	95.2854	0.654787	65.0778	99.3688	237.525	159.892
PSMB5	chr14_23026179_23026198_+	4.58041	159.237	204.171	26.6533	0	153.82	36.4832	41.3667	18.2734
VEGFA	chr6_43777648_43777667_+	401.244	323.228	476.399	667.664	555.259	381.593	259.223	164.8	260.396
NPFFR1	chr10_70254954_70254973_-	217.112	117.646	120.409	207.229	0	156.778	186.256	95.4104	22.8418
ROSA26	chr3_9376443_9376462_+	227.189	0	136.114	64.6341	392.872	44.3712	158.894	56.7125	84.5145
ADORA2A	chr22_24440668_24440687_+	7.32866	30.8968	62.8219	45.9769	5.89308	174.527	196.337	203.498	146.187
XPO1	chr2_61492373_61492392_+	224.44	4.75335	99.468	71.9638	0	0	21.1219	55.3781	13.7051
BAX	chr19_48955780_48955799_+	216.196	338.677	151.82	291.187	39.2872	254.395	138.732	175.475	109.64
PDE4D	chr5_58975751_58975770_-	8.24474	198.453	88.9977	328.501	185.959	221.856	96.4885	261.545	127.914
PPARG	chr3_12379813_12379832_-	299.559	60.6053	52.3516	445.109	472.756	298.766	311.067	215.507	79.9462
SLC12A1	chr15_48251684_48251703_+	180.468	516.927	225.112	287.189	91.0153	245.521	286.585	293.57	283.238
SLC1A2	chr11_35306071_35306090_-	193.293	93.8788	104.703	109.278	46.4899	130.156	223.22	145.451	36.5468
GRIA4	chr11_105612340_105612359_+	120.007	2.37668	109.938	172.58	185.305	230.73	236.181	218.176	82.2303
ZAP70	chr2_97724250_97724269_+	386.587	836.59	261.758	654.337	283.523	281.018	530.927	502.406	445.414
MAP3K12	chr12_53484284_53484303_+	349.944	243.609	83.7625	20.6563	30.775	62.1197	27.3624	8.67367	34.2626
BIRC5	chr17_78214366_78214385_-	385.671	285.201	5.23516	82.6251	7.85744	103.533	93.6083	90.74	36.5468
FGFR3	chr4_1799429_1799448_+	85.1957	256.681	204.171	240.546	402.039	106.491	188.177	128.103	118.777
MDM2	chr12_68828922_68828941_-	0	71.3003	31.4109	10.6613	0	29.5808	6.24055	0	4.56835
DNPEP	chr2_219385623_219385642_+	131.916	407.6	26.1758	177.91	165.006	198.192	75.3667	138.779	29.6943
NDUFB4	chr3_120601123_120601142_-	659.58	78.4303	26.1758	23.3216	0	53.2455	46.5641	141.448	52.536
ALMS1	chr2_73449005_73449024_+	302.307	48.7219	125.644	228.552	595.856	139.03	55.6849	154.792	141.619
SLC1A5	chr19_46778719_46778738_-	274.825	507.421	125.644	189.904	63.5143	115.365	254.422	88.0711	573.328
ADAM12	chr10_126049602_126049621_-	294.979	1.18834	408.342	227.219	194.472	458.503	118.57	274.889	386.026
CD248	chr11_66316308_66316327_-	279.405	363.632	513.045	397.134	362.752	230.73	127.691	120.764	429.425
NDUFS6	chr5_1801447_1801466_+	447.964	609.618	188.466	162.585	84.4675	269.185	269.784	283.562	262.68
BRD2	chr6_GL000254v2_alt_4274560_4274579_-	371.014	192.511	104.703	203.231	33.3941	115.365	47.5242	34.6947	98.2196
SLC22A6	chr11_62981289_62981308_-	237.265	0	293.169	143.928	519.901	115.365	245.302	240.861	255.828
METAP1	chr4_98995808_98995827_-	297.727	615.559	62.8219	292.519	120.481	133.114	157.454	269.551	59.3886
CH25H	chr10_89207074_89207093_+	216.196	3.56502	41.8813	335.165	258.641	346.096	330.749	249.535	255.828
LIPG	chr18_49583586_49583605_+	312.384	822.33	162.29	187.239	198.4	121.281	75.3667	169.47	102.788
AAVS1	chr19_55226156_55226175_+	287.65	11.8834	68.0571	174.579	593.892	212.982	151.213	350.283	804.03
HTR3D	chr3_184036430_184036449_+	144.741	187.758	172.76	275.861	6.54787	62.1197	120.971	136.11	637.285
DPP9	chr19_4684714_4684733_+	214.363	0	104.703	83.2914	307.095	62.1197	120.971	125.435	162.177
FLT4	chr5_180624011_180624030_+	1340.23	537.129	355.991	271.863	395.491	242.563	239.541	268.884	344.911
SLC16A7	chr12_59704997_59705016_+	54.0489	0	350.756	54.6392	209.532	44.3712	54.7248	154.124	162.177
CASP1	chr11_105029880_105029899_-	108.098	95.0671	62.8219	178.577	437.397	210.024	161.294	172.806	292.375
SCN2A	chr2_165342448_165342467_+	21.0699	28.5201	94.2328	261.202	364.716	192.275	74.4066	180.146	95.9354
KDM2A	chr11_67250226_67250245_-	124.587	103.385	62.8219	164.584	9.16701	204.108	108.49	104.084	63.9569
HMOX1	chr22_35386953_35386972_-	562.475	546.636	120.409	143.261	0	337.221	247.222	194.157	449.983
PLA2G10	chr16_14690590_14690609_-	13.7412	4.75335	94.2328	0	0	2.95808	1.92017	38.0307	0
PSMD12	chr17_67366433_67366452_+	7.32866	406.412	266.993	131.934	0	79.8682	107.529	120.097	109.64
GHSR	chr3_172445317_172445336_+	0.916083	0	10.4703	2.66533	0	0	24.4822	34.0275	34.2626
GP1BA	chr17_4934237_4934256_-	111.762	117.646	41.8813	1.33266	0	23.6647	3.84034	98.7464	20.5576
DEGS1	chr1_224189714_224189733_-	7.32866	158.049	125.644	208.562	156.494	2.95808	118.09	67.3878	77.662
GRIK3	chr1_36872277_36872296_+	218.028	131.906	47.1164	229.884	150.601	227.772	124.331	68.055	166.745
HDC	chr15_50252446_50252465_-	688.894	278.071	261.758	153.256	376.502	189.317	221.3	120.764	77.662
ITGB7	chr12_53194199_53194218_-	6.41258	3.56502	314.109	51.9738	0.654787	20.7066	91.6881	40.6995	59.3886
MAPKAPK5	chr12_111880506_111880525_+	0.916083	0	214.641	39.9799	7.85744	59.1616	87.3677	95.4104	100.504
ODC1	chr2_10443275_10443294_-	178.636	102.197	31.4109	175.245	261.26	100.575	56.165	123.433	77.662
NARS	chr18_57602394_57602413_-	149.321	39.2152	73.2922	0	0	50.2874	32.1628	35.3619	45.6835
FLT4	chr5_180630550_180630569_+	2.74825	0	15.7055	42.6452	59.5856	17.7485	14.8813	29.357	89.0829
SSTR1	chr14_38209965_38209984_+	329.79	308.968	350.756	557.719	519.246	334.263	314.908	443.025	253.544
CTSH	chr15_78944895_78944914_+	10.993	734.393	204.171	274.529	238.342	532.455	362.912	105.418	248.975
COL4A5	chrX_108601411_108601430_+	462.622	15.4484	10.4703	107.946	247.509	136.072	157.454	110.756	114.209
CMA1	chr14_24506468_24506487_+	0.916083	219.843	225.112	114.609	197.746	141.988	159.374	246.866	196.439
EPHA7	chr6_93411114_93411133_+	16.4895	224.596	136.114	298.516	394.182	387.509	154.574	282.228	242.123
MET	chr7_116740949_116740968_-	390.251	495.537	115.173	96.6181	331.977	103.533	302.907	335.604	433.993
PLA2G2E	chr1_19922370_19922389_+	432.391	338.677	371.696	379.143	335.251	183.401	439.719	52.042	312.932
ROSA26	chr3_9363106_9363125_+	87.9439	228.161	130.879	155.922	127.683	207.066	264.023	142.115	111.925
CES1	chr16_55821389_55821408_-	53.1328	67.7353	177.995	238.547	95.5989	115.365	152.653	215.507	182.734
LTB4R	chr14_24316109_24316128_-	7.32866	46.3452	99.468	309.178	73.3361	97.6167	64.8057	131.44	109.64
VEGFB	chr11_64235810_64235829_-	109.93	169.932	5.23516	115.942	271.082	121.281	26.4023	252.871	9.1367
RRM2B	chr8_102218853_102218872_-	0.916083	14.2601	99.468	85.9567	23.5723	11.8323	40.8036	130.772	54.8202
PSMD9	chr12_121899744_121899763_+	449.797	474.147	125.644	423.787	644.31	704.024	579.411	221.512	977.627
MAP3K11	chr11_65613592_65613611_+	376.51	225.784	188.466	351.823	693.419	254.395	196.337	167.469	153.04
PRKCH	chr14_61453245_61453264_+	622.936	144.977	492.105	515.74	654.132	375.676	225.62	132.107	557.339
KDM1A	chr1_23077252_23077271_+	4.58041	5.94169	94.2328	4.66432	0	38.4551	49.4444	128.771	287.806
TNFSF11	chr13_42606656_42606675_-	0	0	57.5867	157.254	227.866	82.8263	87.8478	92.7416	137.051
IL1B	chr2_112831368_112831387_-	48.5524	1.18834	57.5867	134.599	58.9308	124.239	145.933	59.3813	328.921
DLX3	chr17_49993401_49993420_-	642.174	697.555	450.224	188.572	451.148	286.934	288.025	178.811	171.313
HTR7	chr10_90749466_90749485_+	196.042	455.134	157.055	501.081	204.293	165.653	432.998	130.772	121.061
STK31	chr7_23717558_23717577_+	124.587	92.6904	172.76	41.3125	56.9664	68.0359	222.74	170.805	159.892
AURKB	chr17_8206751_8206770_-	130.084	218.654	219.877	145.26	104.766	227.772	232.821	32.6931	77.662
AAVS1	chr19_55239672_55239691_+	4.58041	72.4887	99.468	447.108	477.339	97.6167	127.691	99.4136	255.828
GABRA3	chrX_152255850_152255869_-	5.4965	3.56502	183.231	69.9648	125.719	76.9101	114.73	168.136	36.5468
RCE1	chr11_66844893_66844912_-	545.985	1586.43	732.922	291.853	234.414	295.808	486.763	368.965	159.892
PIK3C2B	chr1_204469300_204469319_+	169.475	400.47	109.938	212.56	153.875	319.473	292.826	141.448	34.2626
PSMB5	chr14_23034694_23034713_-	4.58041	159.237	5.23516	3.33166	0	38.4551	44.1639	23.3522	6.85253
TAOK3	chr12_118181541_118181560_-	273.909	41.5919	73.2922	19.9899	34.7037	156.778	114.73	120.097	171.313
PTGIS	chr20_49513081_49513100_-	347.195	1.18834	88.9977	424.453	877.414	139.03	44.1639	91.4072	66.2411
TAOK3	chr12_118189915_118189934_-	199.706	16.6367	130.879	200.566	481.268	65.0778	54.7248	192.155	292.375
PTAFR	chr1_28150370_28150389_+	449.797	48.7219	130.879	143.928	36.0133	378.635	166.575	288.233	159.892
RPS6KA5	chr14_90923135_90923154_-	243.678	5.94169	88.9977	289.188	155.184	242.563	396.515	356.955	52.536
SLC6A12	chr12_192523_192542_+	123.671	339.865	47.1164	132.6	389.598	109.449	128.171	122.766	148.471
CDK11B	chr1_1655406_1655425_+	823.558	0	293.169	483.757	330.667	133.114	260.663	144.116	214.713
P4HTM	chr3_49004134_49004153_-	287.65	16.6367	10.4703	54.6392	5.89308	82.8263	82.0872	56.7125	66.2411
NMUR2	chr5_152398122_152398141_-	222.608	62.9819	73.2922	126.603	43.8707	165.653	231.38	210.17	146.187
SLC6A19	chr5_1216658_1216677_-	581.713	850.85	853.331	484.423	1488.33	982.083	496.364	469.713	650.99
ESR1	chr6_151944384_151944403_-	861.118	1.18834	382.167	186.573	187.269	124.239	121.451	369.632	285.522
PSMD2	chr3_184299886_184299905_+	9.16083	470.582	115.173	151.257	63.5143	65.0778	135.372	124.767	38.831
LIMK2	chr22_31258350_31258369_+	19.2377	404.035	130.879	252.54	340.489	452.587	384.514	344.278	262.68
SBK3	chr19_55544815_55544834_+	420.482	348.183	780.039	609.693	633.833	251.437	312.988	466.377	374.605
EPHB1	chr3_135154194_135154213_+	387.503	67.7353	41.8813	205.23	73.9909	215.94	227.54	58.7141	93.6512
HDAC10	chr22_50248841_50248860_-	251.007	64.1703	308.874	355.821	135.541	59.1616	172.815	245.532	529.929
IFNAR2	chr21_33246818_33246837_+	10.993	181.816	240.817	303.847	484.542	186.359	148.333	423.676	347.195
MMP14	chr14_22841927_22841946_-	529.496	1.18834	219.877	21.3226	102.147	11.8323	88.8078	65.3862	61.6728
PLA2G2E	chr1_19922670_19922689_+	458.957	360.067	141.349	81.2924	402.039	156.778	150.733	282.228	447.699
AKT3	chr1_243552877_243552896_+	2.74825	30.8968	73.2922	4.66432	5.23829	85.7844	98.8887	128.103	13.7051
TUBB6	chr18_12308720_12308739_+	163.979	1030.29	193.701	105.28	137.505	50.2874	89.7679	42.7012	29.6943
PSMC1	chr14_90263834_90263853_-	64.1258	604.864	157.055	59.3035	153.875	224.814	217.459	106.753	404.299
MTNR1A	chr4_186534530_186534549_-	509.342	344.618	183.231	335.831	114.588	467.377	373.473	125.435	333.49
STK32B	chr4_5168399_5168418_+	91.6083	57.0403	109.938	52.6402	51.0734	141.988	89.2879	120.097	98.2196
CACNA2D3	chr3_54570028_54570047_-	0.916083	0	31.4109	212.56	237.688	68.0359	50.4044	50.7076	164.461
SLC6A3	chr5_1432486_1432505_+	4.58041	390.963	329.815	235.215	313.643	201.15	214.099	318.924	733.221
PKN1	chr19_14441412_14441431_+	76.9509	144.977	251.288	60.6362	218.699	204.108	223.7	615.164	269.533
PI4K2A	chr10_97656367_97656386_+	105.35	152.107	151.82	97.2844	84.4675	118.323	106.089	138.779	180.45
NDUFS3	chr11_47579283_47579302_-	100.769	285.201	486.87	204.564	1.30957	183.401	234.261	150.788	95.9354
DYRK1B	chr19_39831806_39831825_-	779.586	114.081	177.995	183.241	49.109	192.275	94.5683	312.919	445.414
CTLA4	chr2_203870884_203870903_-	4.58041	118.834	225.112	199.233	0.654787	118.323	113.29	186.818	59.3886
NEK1	chr4_169585441_169585460_+	451.629	51.0986	324.58	113.276	433.469	91.7006	159.374	35.3619	50.2519
ERN1	chr17_64055679_64055698_-	8.24474	203.206	141.349	66.6331	174.173	65.0778	29.7626	143.449	89.0829
EGFR	chr7_55142391_55142410_+	305.972	168.744	31.4109	281.192	431.504	260.311	230.9	240.861	118.777
CA5B	chrX_15772593_15772612_+	113.594	520.492	340.285	179.909	1198.91	488.084	301.467	589.143	312.932
CDK18	chr1_205523604_205523623_+	90.6922	202.018	544.456	93.2864	55.6569	195.233	126.251	172.806	109.64
ANPEP	chr15_89799499_89799518_-	1.83217	344.618	120.409	211.227	244.235	85.7844	98.4087	196.158	294.659
CIAO1	chr2_96267621_96267640_+	602.782	45.1569	214.641	116.608	95.5989	106.491	206.898	244.197	107.356
PDGFRA	chr4_54263689_54263708_-	1.83217	30.8968	10.4703	53.3065	78.5744	103.533	192.017	148.12	63.9569
SLC28A2	chr15_45267466_45267485_-	6.41258	2.37668	136.114	268.532	477.339	70.994	180.496	123.433	212.428
ICAM1	chr19_10284807_10284826_+	530.412	89.1254	141.349	213.226	193.162	88.7425	217.939	315.588	630.433
KCND2	chr7_120275726_120275745_+	63.2097	0	0	77.9608	6.54787	141.988	71.5263	57.3797	70.8095
VEGFA	chr6_43774371_43774390_+	261.084	0	83.7625	107.946	0	168.611	146.413	141.448	6.85253
LPAR1	chr9_110941511_110941530_-	87.9439	1111.1	251.288	573.711	324.119	411.173	350.911	396.32	333.49
SMARCA4	chr19_11025447_11025466_+	313.3	306.591	298.404	7.32965	240.961	53.2455	32.1628	39.3651	255.828
CDK15	chr2_201807885_201807904_-	58.6293	368.385	188.466	63.9678	4.58351	50.2874	60.9654	168.136	20.5576
NDUFA7	chr19_8316602_8316621_+	413.153	8.31837	549.692	133.933	216.734	198.192	240.501	51.3748	114.209
KDM4A	chr1_43666517_43666536_-	429.643	0	26.1758	58.6372	28.8106	56.2036	31.6828	72.0582	70.8095
CAMK2G	chr10_73852310_73852329_-	223.524	287.578	298.404	43.3115	81.1935	183.401	92.1681	233.522	155.324
OXSR1	chr3_38190792_38190811_+	2.74825	203.206	151.82	353.822	400.075	245.521	282.265	294.905	114.209
SCN4A	chr17_63972450_63972469_-	0	0	62.8219	74.6291	58.276	38.4551	75.3667	10.6753	2.28418
PIK3R1	chr5_68293178_68293197_+	96.1887	0	0	71.9638	55.6569	14.7904	12.0011	108.755	178.166
PPIA	chr7_44799770_44799789_+	72.3705	197.264	10.4703	42.6452	3.27393	82.8263	219.859	118.763	162.177
NUP85	chr17_75225442_75225461_-	219.86	0	162.29	40.6462	30.1202	44.3712	17.7616	70.7238	77.662
ALK	chr2_29233559_29233578_+	530.412	142.601	78.5274	55.3055	272.391	156.778	86.8877	52.7092	15.9892
DCLK3	chr3_36721595_36721614_-	1.83217	62.9819	109.938	105.28	216.08	79.8682	310.107	318.924	121.061
XIAP	chrX_123886108_123886127_+	301.391	172.309	177.995	405.796	98.218	20.7066	161.294	74.727	143.903
KCNH2	chr7_150951642_150951661_+	109.014	83.1837	266.993	101.949	177.447	393.425	195.857	27.3554	86.7987
TNFSF4	chr1_173186706_173186725_-	146.573	39.2152	335.05	84.6241	190.543	171.569	156.974	188.819	744.641
BRD9	chr5_891744_891763_-	403.076	235.291	88.9977	0	82.5031	165.653	308.187	100.081	54.8202
KCNQ2	chr20_63444707_63444726_-	425.978	493.161	219.877	210.561	122.445	319.473	264.503	501.071	383.742
SV2A	chr1_149909519_149909538_-	4.58041	139.036	31.4109	113.276	88.3962	32.5389	112.33	95.4104	22.8418
MAP3K3	chr17_63691212_63691231_+	327.042	979.191	183.231	95.9517	0	139.03	59.5253	86.7367	114.209
MARK3	chr14_103405195_103405214_+	3.66433	95.0671	99.468	66.6331	121.79	168.611	53.2847	218.843	141.619
PTGER1	chr19_14474064_14474083_-	10.993	420.672	293.169	442.444	328.048	526.539	224.66	281.561	408.868
CACNB3	chr12_48827024_48827043_+	68.7062	111.704	293.169	161.252	183.995	458.503	273.144	266.215	139.335
ATP1A4	chr1_160171297_160171316_+	4.58041	244.798	261.758	91.2874	372.574	153.82	208.338	86.0695	306.08
LPAR5	chr12_6620899_6620918_-	238.182	357.69	214.641	436.447	663.299	251.437	239.541	278.225	509.371
PSMB6	chr17_4796736_4796755_+	458.041	375.515	287.934	38.6472	1.96436	53.2455	0	62.7173	34.2626
INPPL1	chr11_72231158_72231177_-	117.259	0	20.9406	288.521	121.79	689.233	592.852	102.082	194.155
MMP7	chr11_102527842_102527861_+	341.699	67.7353	240.817	89.2884	196.436	133.114	66.7259	215.507	114.209
PRKCB	chr16_24032197_24032216_-	283.986	476.524	136.114	175.911	412.516	304.682	108.97	204.165	159.892
SGK1	chr6_134173133_134173152_-	319.713	245.986	167.525	41.3125	26.8463	76.9101	97.4486	83.4007	116.493
PDE3A	chr12_20369882_20369901_-	492.853	299.461	272.228	507.745	305.785	399.341	282.265	314.254	372.321
KMO	chr1_241568542_241568561_-	8.24474	303.026	62.8219	205.896	275.665	44.3712	49.4444	152.79	52.536
MSLN	chr16_766953_766972_-	7.32866	275.695	193.701	105.947	135.541	56.2036	43.2038	116.761	121.061
KLK5	chr19_50950060_50950079_+	313.3	349.372	99.468	114.609	45.8351	180.443	316.828	455.701	354.047
SIRT2	chr19_38889084_38889103_-	522.167	482.465	518.281	331.167	1084.98	541.329	386.914	233.522	349.479
IDO1	chr8_39923504_39923523_+	128.252	437.309	20.9406	554.388	470.792	82.8263	213.619	253.538	244.407
ABCB4	chr7_87431508_87431527_+	174.972	229.349	130.879	253.206	84.4675	198.192	223.22	364.961	45.6835
TBXA2R	chr19_3600233_3600252_+	387.503	798.564	219.877	611.026	314.952	378.635	312.988	368.965	472.824
CCR9	chr3_45894931_45894950_-	80.6153	52.2869	167.525	88.6221	182.031	242.563	327.389	174.141	582.465
AAVS1	chr19_55156847_55156866_+	69.6223	0	136.114	33.9829	0	88.7425	18.7217	109.422	27.4101
KCNJ14	chr19_48462321_48462340_+	305.056	413.542	376.931	464.433	377.157	786.85	501.644	314.921	488.814
F12	chr5_177403998_177404017_+	613.775	2.37668	162.29	328.501	284.832	20.7066	190.097	44.7028	488.814
PPARA	chr22_46235302_46235321_+	0.916083	292.331	68.0571	74.6291	214.115	109.449	61.9255	69.3894	59.3886
KDM7A	chr7_140101991_140102010_-	15.5734	39.2152	26.1758	55.9718	203.639	156.778	75.8467	44.0356	70.8095
PSMD5	chr9_120826861_120826880_-	276.657	97.4438	324.58	181.908	96.9084	103.533	140.172	92.7416	335.774
ROSA26	chr3_9379186_9379205_+	1.83217	0	5.23516	100.616	74.6457	68.0359	139.212	93.4088	27.4101
KCNH8	chr3_19438203_19438222_+	117.259	224.596	52.3516	125.27	0	292.85	177.616	114.092	232.986
KCNJ12	chr17_21415817_21415836_-	0.916083	102.197	36.6461	100.616	70.717	360.886	207.378	220.845	210.144
CA4	chr17_60158278_60158297_+	117.259	57.0403	209.406	0	0	23.6647	44.6439	0.667206	73.0936
SGPL1	chr10_70859458_70859477_+	6.41258	162.802	371.696	191.237	299.892	136.072	150.733	130.105	157.608
CYP2J2	chr1_59926613_59926632_-	0.916083	53.4752	73.2922	607.694	762.172	423.006	288.505	167.469	111.925
GPR87	chr3_151294632_151294651_+	101.685	26.1434	172.76	122.605	289.416	248.479	180.976	306.915	125.63
SLC12A6	chr15_34239030_34239049_-	4.58041	292.331	251.288	67.2995	277.63	174.527	163.214	204.832	59.3886
FER	chr5_109186256_109186275_-	0	0	73.2922	127.936	126.374	239.605	213.619	136.11	29.6943
AQP5	chr12_49962320_49962339_+	95.2726	71.3003	78.5274	189.904	267.808	136.072	85.9276	146.785	75.3778
USP14	chr18_163411_163430_+	411.321	181.816	256.523	183.241	354.894	328.347	352.351	229.519	207.86
SCTR	chr2_119465849_119465868_-	319.713	153.296	177.995	83.2914	61.5499	118.323	135.852	125.435	132.482
CA14	chr1_150261580_150261599_-	48.5524	253.116	298.404	202.565	0	112.407	117.61	194.157	159.892
NGFR	chr17_49506540_49506559_+	807.985	722.51	544.456	185.24	350.966	286.934	263.063	323.595	139.335
GRIN2C	chr17_74850278_74850297_+	324.293	4.75335	151.82	25.9869	121.79	41.4132	98.4087	118.763	61.6728
ITGAM	chr16_31271014_31271033_-	15.5734	629.819	198.936	340.495	234.414	269.185	243.381	127.436	89.0829
EPHA4	chr2_221563811_221563830_-	14.6573	493.161	73.2922	205.23	133.576	396.383	437.319	242.196	251.259
ADH1C	chr4_99345012_99345031_+	4.58041	147.354	125.644	169.915	618.773	334.263	243.862	240.861	148.471
KCNQ4	chr1_40817335_40817354_-	403.076	231.726	167.525	198.567	110.004	29.5808	14.4013	50.0404	57.1044
NMBR	chr6_142088590_142088609_-	277.573	358.878	10.4703	255.205	108.695	215.94	234.261	105.418	175.882
F5	chr1_169540826_169540845_+	309.636	303.026	115.173	61.9688	121.79	109.449	124.331	210.837	47.9677
SUV39H1	chrX_48706557_48706576_-	294.979	267.376	162.29	253.872	658.061	198.192	186.256	398.322	324.353
AAVS1	chr19_55179463_55179482_+	305.056	206.771	319.345	181.242	153.875	470.335	268.344	223.514	431.709
KLKB1	chr4_186251830_186251849_+	273.909	154.484	52.3516	133.266	118.516	70.994	124.811	158.128	189.587
PSMB9	chr6_GL000254v2_alt_4155216_4155235_+	174.972	122.399	204.171	225.22	438.052	242.563	284.665	264.881	155.324
SERPINA3	chr14_94619219_94619238_+	381.09	222.219	136.114	353.822	604.368	301.724	261.623	89.4056	212.428
KCNV1	chr8_109972658_109972677_+	491.02	424.237	88.9977	55.3055	269.772	115.365	202.098	179.478	143.903
AOC3	chr17_42852674_42852693_-	0.916083	0	183.231	37.9809	0	56.2036	82.5673	157.461	68.5253
KDM4E	chr11_95025691_95025710_-	15.5734	2.37668	62.8219	46.6432	0.654787	70.994	106.089	12.6769	93.6512
CUL4A	chr13_113229480_113229499_-	253.755	587.039	266.993	357.154	0.654787	298.766	134.412	144.116	333.49
FPR1	chr19_51746427_51746446_-	369.181	360.067	62.8219	218.557	385.669	79.8682	69.1261	80.0647	61.6728
ROSA26	chr3_9380148_9380167_+	463.538	90.3137	266.993	485.756	155.839	230.73	162.254	175.475	230.702
CCR4	chr3_32953873_32953892_-	212.531	256.681	130.879	168.582	164.351	186.359	280.825	294.905	239.838
SGPL1	chr10_70851189_70851208_+	232.685	20.2018	371.696	167.249	129.648	218.898	177.136	272.887	175.882
KCND1	chrX_48969977_48969996_+	92.5244	183.004	230.347	95.9517	110.659	177.485	269.304	388.314	164.461
C21orf33	chr21_44136061_44136080_+	67.7901	716.568	130.879	227.219	239.652	147.904	95.0484	266.882	363.184
GLRB	chr4_157122376_157122395_+	1.83217	0	31.4109	9.32864	47.7994	2.95808	71.5263	47.3716	18.2734
CD3D	chr11_118339189_118339208_-	136.496	143.789	104.703	80.6261	582.105	70.994	72.4864	50.0404	41.1152
CNGA3	chr2_98396063_98396082_-	5.4965	2.37668	99.468	18.6573	4.58351	14.7904	96.9686	135.443	11.4209
TGFB2	chr1_218405295_218405314_+	219.86	206.771	204.171	45.3105	116.552	192.275	133.932	168.136	31.9785
CDK3	chr17_76002288_76002307_-	385.671	487.219	151.82	119.94	165.661	56.2036	103.209	85.4023	157.608
PDE6C	chr10_93613114_93613133_-	219.86	217.466	41.8813	175.245	275.01	141.988	188.657	54.7109	105.072
ADAM17	chr2_9502214_9502233_-	10.993	150.919	198.936	451.106	477.339	147.904	330.269	166.134	89.0829
KCNK3	chr2_26693026_26693045_+	98.0209	474.147	157.055	299.183	235.068	88.7425	148.813	285.564	310.648
KCNG1	chr20_51009949_51009968_+	336.202	245.986	240.817	163.251	426.266	174.527	100.809	135.443	105.072
SLC6A15	chr12_84885977_84885996_-	141.077	0	52.3516	70.6311	218.699	97.6167	171.855	60.7157	191.871
CASP4	chr11_104954924_104954943_+	0	81.9954	157.055	315.841	11.1314	5.91616	12.4811	178.811	41.1152
GRIA3	chrX_123253521_123253540_+	6.41258	98.6321	130.879	251.873	120.481	133.114	56.645	122.766	89.0829
CD4	chr12_6816372_6816391_+	351.776	0	62.8219	255.871	340.489	94.6586	84.9675	122.099	424.857
SLC6A15	chr12_84885461_84885480_+	89.7761	117.646	47.1164	132.6	1.96436	50.2874	56.165	70.7238	134.766
RXRA	chr9_134408239_134408258_-	3.66433	137.847	256.523	176.578	307.095	387.509	260.183	188.819	347.195
TRIM24	chr7_138570897_138570916_-	226.272	117.646	261.758	205.23	39.942	141.988	203.058	214.84	212.428
ALOX15	chr17_4633468_4633487_+	138.328	4.75335	130.879	229.884	19.6436	32.5389	16.8015	112.758	132.482
CTRC	chr1_15440503_15440522_+	747.524	123.587	172.76	148.592	130.303	141.988	251.542	210.837	66.2411
CACNA2D2	chr3_50368224_50368243_-	42.1398	59.4169	340.285	239.879	160.423	121.281	84.9675	120.764	4.56835
AVPR2	chrX_153905725_153905744_-	206.119	96.2554	151.82	117.274	326.084	73.9521	100.329	144.784	98.2196
CCR5	chr3_46371562_46371581_-	76.0349	343.43	188.466	56.6382	53.0377	310.599	83.5274	142.782	73.0936
PDE4C	chr19_18218190_18218209_-	556.062	3.56502	371.696	415.124	443.945	307.641	232.341	264.213	159.892
SQLE	chr8_125005620_125005639_+	120.923	0	36.6461	98.617	278.939	76.9101	53.2847	87.4039	139.335
ATP1A1	chr1_116387353_116387372_-	66.874	148.542	204.171	77.9608	432.159	38.4551	155.054	133.441	159.892
PSME3	chr17_42838098_42838117_-	351.776	142.601	5.23516	19.9899	0	17.7485	88.3278	166.801	47.9677
PLAT	chr8_42185128_42185147_+	0.916083	61.7936	177.995	197.234	144.708	159.736	143.533	142.115	59.3886
TXK	chr4_48086551_48086570_-	119.091	159.237	15.7055	114.609	454.422	147.904	188.177	146.785	324.353
INSR	chr19_7184365_7184384_+	713.628	402.847	94.2328	208.562	627.94	236.647	134.892	174.808	169.029
PSMD13	chr11_244177_244196_-	139.245	0	151.82	73.9628	0	38.4551	99.3688	189.486	41.1152
CTSB	chr8_11848053_11848072_+	125.503	105.762	78.5274	98.617	158.458	76.9101	86.8877	76.7286	22.8418
SRC	chr20_37401654_37401673_-	450.713	442.062	287.934	71.9638	248.164	298.766	290.426	172.139	406.583
KCNA6	chr12_4810145_4810164_+	330.706	89.1254	78.5274	195.235	347.692	82.8263	48.4843	236.858	100.504
CHRNB1	chr17_7446925_7446944_+	152.07	357.69	94.2328	204.564	167.625	156.778	183.856	162.131	150.756
C7	chr5_40958203_40958222_+	844.628	217.466	272.228	383.807	185.305	106.491	216.019	230.186	123.346
BRD7	chr16_50368231_50368250_-	151.154	232.914	125.644	11.3276	53.0377	124.239	107.049	110.089	127.914
JUN	chr1_58782655_58782674_-	214.363	298.273	298.404	1188.07	1339.69	357.928	565.01	442.357	433.993
ROSA26	chr3_9375147_9375166_-	0	0	47.1164	65.3005	18.9888	65.0778	120.971	96.7448	111.925
CA9	chr9_35676161_35676180_+	623.852	235.291	225.112	25.9869	115.897	70.994	96.4885	140.113	150.756
NPC1L1	chr7_44533466_44533485_+	200.622	1.18834	392.637	326.502	347.692	236.647	165.615	240.194	527.645
SRMS	chr20_63547271_63547290_-	138.328	0	298.404	170.581	86.4318	212.982	59.0452	137.444	91.367
AAVS1	chr19_55126661_55126680_-	795.16	168.744	424.048	202.565	114.588	286.934	158.414	141.448	262.68
EPCAM	chr2_47374026_47374045_-	1.83217	0	57.5867	107.279	101.492	85.7844	29.2826	49.3732	6.85253
IL15	chr4_141729849_141729868_-	259.251	81.9954	167.525	358.486	71.3717	50.2874	262.103	86.0695	171.313
XIAP	chrX_123886503_123886522_+	187.797	68.9236	10.4703	73.9628	57.6212	47.3293	90.248	111.423	86.7987
CACNA1S	chr1_201062028_201062047_-	64.1258	43.9685	73.2922	109.278	136.85	177.485	115.69	226.183	319.785
TUBA1C	chr12_49269951_49269970_-	167.643	142.601	287.934	0	76.61	94.6586	68.166	126.769	274.101
SCN4A	chr17_63968162_63968181_+	399.412	262.623	125.644	248.542	350.311	153.82	225.14	148.12	166.745
ACAT1	chr11_108138888_108138907_+	906.006	311.345	246.052	145.26	338.525	218.898	403.716	192.822	70.8095
NGFR	chr17_49506297_49506316_+	183.217	279.26	109.938	173.912	451.803	328.347	251.542	214.84	164.461
FGR	chr1_27616885_27616904_+	12.8252	0	104.703	71.9638	77.2648	159.736	36.0032	46.0372	82.2303
SCN5A	chr3_38575358_38575377_-	103.517	393.34	256.523	138.597	94.9441	337.221	217.939	484.391	164.461
GRIN2C	chr17_74854801_74854820_+	392.083	83.1837	94.2328	155.922	78.5744	97.6167	182.416	146.118	25.1259
GJA8	chr1_147908264_147908283_+	156.65	482.465	130.879	315.175	200.365	159.736	246.742	189.486	326.637
TESK2	chr1_45347907_45347926_+	185.049	111.704	282.699	339.163	484.542	162.695	266.904	165.467	57.1044
GABRB2	chr5_161546382_161546401_+	312.384	22.5784	235.582	272.53	159.113	47.3293	146.413	178.811	182.734
GJB5	chr1_34757328_34757347_-	6.41258	66.547	188.466	223.221	15.7149	88.7425	106.089	134.108	98.2196
SCN8A	chr12_51699648_51699667_-	0.916083	42.7802	31.4109	74.6291	101.492	68.0359	117.13	53.3765	0
LTC4S	chr5_179795626_179795645_-	270.244	521.681	345.52	181.242	386.324	121.281	53.7647	124.767	267.249
NDUFB6	chr9_32572889_32572908_-	133.748	3.56502	36.6461	114.609	41.2516	23.6647	155.054	59.3813	84.5145
ABCC1	chr16_16071694_16071713_+	247.342	35.6502	26.1758	30.6512	127.029	230.73	90.728	172.139	50.2519
CDK14	chr7_90917680_90917699_+	283.986	129.529	240.817	52.6402	329.358	221.856	271.224	330.267	123.346
CTSE	chr1_206015999_206016018_+	131	393.34	157.055	137.264	51.0734	85.7844	160.334	220.178	253.544
TBCD	chr17_82893598_82893617_-	288.566	91.5021	41.8813	0.666331	255.367	68.0359	116.17	41.3667	41.1152
MC3R	chr20_56249261_56249280_-	198.79	7.13003	167.525	161.252	417.099	112.407	94.5683	321.593	269.533
PAH	chr12_102844330_102844349_+	173.14	0	204.171	7.32965	451.148	147.904	181.936	70.7238	148.471
TRIM24	chr7_138551088_138551107_-	497.433	123.587	319.345	331.167	651.513	183.401	186.256	265.548	543.634
PANX3	chr11_124611656_124611675_-	231.769	0	120.409	241.212	90.3606	390.467	354.271	240.861	296.943
ITGB3	chr17_47283505_47283524_+	453.461	102.197	418.813	310.51	355.549	366.802	372.513	402.325	139.335
DRD3	chr3_114171720_114171739_+	451.629	153.296	204.171	273.196	197.091	127.198	115.21	415.002	77.662
GHR	chr5_42699918_42699937_-	58.6293	443.25	115.173	357.154	289.416	399.341	366.272	172.806	182.734
NDUFS6	chr5_1814380_1814399_-	789.663	198.453	261.758	372.479	378.467	517.664	459.401	577.133	600.738
ARG1	chr6_131576683_131576702_+	0.916083	121.211	20.9406	88.6221	0	17.7485	23.042	132.774	132.482
BRS3	chrX_136490439_136490458_+	4.58041	87.9371	5.23516	87.9557	346.382	118.323	112.33	158.795	422.573
SPR	chr2_72887714_72887733_+	179.552	2.37668	256.523	87.2894	47.7994	275.102	141.132	138.779	274.101
HIF1A	chr14_61734264_61734283_+	4.58041	0	167.525	91.2874	0	47.3293	59.5253	121.431	41.1152
CSRP2	chr12_76866204_76866223_+	633.013	92.6904	172.76	118.607	299.892	168.611	104.169	129.438	139.335
CNR1	chr6_88144698_88144717_+	2.74825	295.896	125.644	168.582	0	168.611	120.971	180.146	107.356
ESR2	chr14_64257332_64257351_-	111.762	571.591	675.335	679.658	276.32	272.144	172.335	381.642	612.159
AAVS1	chr19_55185846_55185865_+	19.2377	313.721	198.936	130.601	45.8351	319.473	242.421	196.826	50.2519
PTGIS	chr20_49550130_49550149_+	109.93	335.111	293.169	79.9598	21.608	183.401	220.339	106.086	223.849
PRMT8	chr12_3540744_3540763_-	207.951	0	83.7625	112.61	146.017	177.485	208.338	104.084	363.184
TESK1	chr9_35609021_35609040_-	460.79	351.748	303.639	147.926	285.487	360.886	311.067	223.514	315.216
GSR	chr8_30696397_30696416_+	240.93	216.278	130.879	277.194	393.527	399.341	375.873	395.653	93.6512
PCSK9	chr1_55043851_55043870_+	377.426	469.394	261.758	237.88	147.982	168.611	203.538	369.632	344.911
SLC6A5	chr11_20601361_20601380_+	173.14	0	261.758	405.129	417.754	210.024	220.819	178.144	100.504
CDK10	chr16_89692477_89692496_-	218.944	194.888	167.525	70.6311	165.006	130.156	122.891	23.3522	25.1259
PSMA7	chr20_62139132_62139151_+	68.7062	346.995	329.815	68.6321	0	17.7485	19.2017	38.0307	27.4101
HNRNPK	chr9_83973287_83973306_-	45.8041	0	20.9406	33.9829	159.768	68.0359	105.129	13.3441	9.1367
GNRH1	chr8_25423274_25423293_-	597.286	843.72	104.703	1417.95	1233.62	212.982	260.663	536.433	262.68
HRH2	chr5_175683627_175683646_-	927.992	449.192	198.936	257.204	259.296	210.024	95.0484	159.462	141.619
KDM4C	chr9_6986632_6986651_-	7.32866	128.341	162.29	177.244	178.757	100.575	161.294	182.814	66.2411
AAVS1	chr19_55234927_55234946_+	109.014	351.748	130.879	231.217	532.996	115.365	70.0862	180.146	274.101
CCR8	chr3_39332729_39332748_-	174.056	500.291	272.228	249.208	361.442	541.329	177.616	391.65	201.007
CALCA	chr11_14968975_14968994_-	211.615	85.5604	109.938	163.251	107.385	144.946	286.105	94.7432	239.838
HSD11B1	chr1_209705887_209705906_+	513.006	30.8968	88.9977	211.227	125.064	85.7844	156.494	140.113	312.932
CACNB3	chr12_48825710_48825729_+	389.335	430.179	382.167	145.26	320.845	304.682	266.424	218.843	198.723
CHRNA1	chr2_174750006_174750025_+	4.58041	71.3003	5.23516	1.33266	0	53.2455	8.64076	19.349	36.5468
HRH4	chr18_24468815_24468834_-	491.02	116.457	136.114	25.9869	88.3962	44.3712	48.0042	130.772	82.2303
KIR2DL1	chr19_54773584_54773603_-	89.7761	0	125.644	89.2884	35.3585	165.653	248.662	86.7367	93.6512
MMP13	chr11_102950136_102950155_-	270.244	206.771	413.577	286.522	155.184	360.886	454.6	358.289	258.112
CPT2	chr1_53210307_53210326_-	2.74825	122.399	31.4109	120.606	122.445	41.4132	128.651	70.0566	123.346
CTH	chr1_70432119_70432138_-	4.58041	477.712	198.936	87.9557	37.9776	115.365	193.937	56.0453	182.734
HTR4	chr5_148509778_148509797_-	455.293	689.236	109.938	467.098	634.488	245.521	290.906	481.722	486.53
ECT2	chr3_172805848_172805867_+	272.993	86.7487	125.644	33.9829	0	20.7066	0	14.6785	2.28418
CACNG4	chr17_67018249_67018268_-	564.307	560.896	397.872	198.567	387.634	112.407	97.9286	197.493	182.734
PTGIR	chr19_46623935_46623954_+	137.412	38.0268	429.283	216.558	448.529	375.676	361.952	232.188	166.745
KCNK3	chr2_26727939_26727958_-	5.4965	206.771	146.584	74.6291	180.721	62.1197	168.975	36.0291	77.662
GHRHR	chr7_30974993_30975012_-	54.0489	155.672	214.641	279.193	503.531	431.88	352.831	122.099	100.504
YARS2	chr12_32755176_32755195_+	173.14	180.627	78.5274	0	0.654787	65.0778	49.4444	18.6818	0
MMP16	chr8_88167921_88167940_+	2.74825	0	20.9406	9.99497	1.96436	14.7904	8.64076	146.785	70.8095
GC	chr4_71768400_71768419_-	4.58041	111.704	177.995	81.9588	1.30957	124.239	122.411	121.431	18.2734
AAVS1	chr19_55204703_55204722_-	463.538	158.049	130.879	22.6553	73.3361	59.1616	146.413	94.076	63.9569
ALPL	chr1_21563165_21563184_-	539.573	386.21	785.274	565.049	345.073	434.838	735.905	587.141	326.637
PDK3	chrX_24503479_24503498_-	156.65	28.5201	83.7625	68.6321	111.969	14.7904	17.7616	38.0307	57.1044
KCNH4	chr17_42175655_42175674_+	415.902	190.134	518.281	423.787	98.8728	346.096	180.976	63.3845	68.5253
PRKG1	chr10_51153242_51153261_+	0	58.2286	73.2922	123.938	0	162.695	204.498	195.491	61.6728
KDM6A	chrX_45053949_45053968_-	402.16	46.3452	413.577	111.277	150.601	112.407	144.493	106.753	187.302
IL6R	chr1_154430528_154430547_-	1.83217	0	293.169	123.938	84.4675	56.2036	154.574	66.7206	38.831
CCR9	chr3_45901386_45901405_-	172.224	0	52.3516	163.918	97.5632	337.221	172.815	44.7028	100.504
HDC	chr15_50252647_50252666_+	0.916083	78.4303	15.7055	117.274	133.576	11.8323	52.3246	50.0404	57.1044
VIPR1	chr3_42527987_42528006_+	644.922	5.94169	141.349	238.547	478.649	174.527	292.826	250.869	210.144
CD274	chr9_5457256_5457275_+	166.727	0	340.285	167.916	15.0601	70.994	108.01	273.554	290.09
AAVS1	chr19_55166003_55166022_+	123.671	714.192	230.347	155.255	1.30957	254.395	282.745	256.207	513.94
PRKCQ	chr10_6511037_6511056_+	6.41258	469.394	460.694	407.128	398.11	85.7844	271.704	266.215	294.659
PCSK1	chr5_96400120_96400139_+	353.608	187.758	88.9977	267.865	13.7505	177.485	202.098	44.0356	230.702
SLC12A2	chr5_128151375_128151394_+	0	0	62.8219	0	0	59.1616	34.083	54.0437	27.4101
NR2E3	chr15_71811576_71811595_+	579.88	432.555	361.226	389.138	242.926	159.736	284.185	389.648	146.187
FGFR3	chr4_1801950_1801969_+	330.706	524.057	246.052	96.6181	94.2893	292.85	341.31	31.3587	123.346
RPS6KA3	chrX_20195100_20195119_-	115.426	64.1703	68.0571	136.598	133.576	174.527	103.689	124.767	61.6728
CACNG3	chr16_24354871_24354890_+	391.167	338.677	136.114	288.521	303.821	165.653	247.702	35.3619	383.742
ATP6AP1	chrX_154434291_154434310_-	1.83217	67.7353	5.23516	19.3236	0	53.2455	26.8824	46.7044	22.8418
NAMPT	chr7_106272596_106272615_-	418.65	314.91	68.0571	19.9899	0.654787	112.407	138.252	62.7173	66.2411
ROSA26	chr3_9368344_9368363_-	102.601	0	136.114	211.227	127.029	130.156	53.2847	50.7076	194.155
NDC80	chr18_2573079_2573098_-	68.7062	185.381	10.4703	24.6543	0	20.7066	33.1229	4.00323	27.4101
CDS1	chr4_84645231_84645250_+	127.335	5.94169	15.7055	67.2995	20.9532	230.73	387.394	136.777	260.396
KCNQ3	chr8_132137886_132137905_-	98.0209	1.18834	10.4703	42.6452	238.342	109.449	169.935	81.3991	162.177
TPP2	chr13_102638251_102638270_+	0	48.7219	240.817	297.184	377.157	56.2036	148.333	36.6963	239.838
NDUFS8	chr11_68033154_68033173_+	1.83217	110.515	15.7055	111.277	262.569	141.988	49.4444	13.3441	98.2196
KCNC2	chr12_75207693_75207712_-	327.958	114.081	261.758	215.891	130.957	85.7844	299.546	174.141	269.533
PDE5A	chr4_119606822_119606841_+	1.83217	169.932	5.23516	2.66533	0	91.7006	108.01	54.0437	50.2519
KDM4E	chr11_95026109_95026128_+	2.74825	489.596	434.518	323.837	125.064	118.323	280.825	130.772	171.313
NPEPL1	chr20_58693855_58693874_+	365.517	537.129	209.406	110.611	243.581	127.198	177.616	167.469	38.831
IL2RG	chrX_71109337_71109356_+	442.468	270.941	99.468	215.225	525.794	79.8682	92.6482	296.239	207.86
DOT1L	chr19_2222059_2222078_-	210.699	358.878	188.466	79.9598	51.0734	79.8682	179.056	76.0614	105.072
PTHLH	chr12_27963577_27963596_+	492.853	2.37668	125.644	197.9	385.669	425.964	102.249	76.7286	324.353
SIK3	chr11_116875375_116875394_-	12.8252	199.641	151.82	163.251	286.142	168.611	100.809	65.3862	116.493
BIRC2	chr11_102350381_102350400_-	105.35	250.739	5.23516	40.6462	53.6925	91.7006	43.6839	79.3975	29.6943
RARG	chr12_53211794_53211813_+	4.58041	96.2554	57.5867	35.3156	0	0	18.2416	44.7028	45.6835
HIPK1	chr1_113966251_113966270_+	464.454	93.8788	172.76	137.931	369.3	65.0778	17.7616	89.4056	219.281
ADH1A	chr4_99286908_99286927_+	279.405	7.13003	230.347	201.232	385.669	56.2036	85.4475	310.918	198.723
BRD3	chr9_134045321_134045340_-	906.006	307.78	350.756	153.923	226.556	224.814	315.388	140.113	543.634
PAK3	chrX_111163007_111163026_-	477.279	569.214	167.525	367.149	459.66	109.449	234.741	152.123	285.522
KCNJ12	chr17_21416149_21416168_+	239.098	2.37668	88.9977	165.25	145.363	266.227	180.976	285.564	347.195
SERPINA1	chr14_KI270847v1_alt_1499256_1499275_-	799.74	598.923	31.4109	206.563	393.527	168.611	66.2458	71.391	242.123
NTRK2	chr9_84745039_84745058_+	69.6223	177.062	20.9406	233.216	7.20265	153.82	123.851	226.183	198.723
PROKR1	chr2_68655001_68655020_-	624.768	96.2554	533.986	149.258	562.462	94.6586	80.6471	180.813	198.723
KCNH1	chr1_210919831_210919850_-	126.419	5.94169	125.644	297.184	406.623	236.647	268.824	115.427	153.04
PDE1B	chr12_54569552_54569571_+	54.965	9.50671	214.641	35.3156	39.2872	136.072	89.2879	196.158	43.3993
NDUFAF2	chr5_61073171_61073190_+	133.748	1.18834	78.5274	83.9578	0	5.91616	24.0021	112.758	84.5145
DPP8	chr15_65497865_65497884_-	307.804	26.1434	20.9406	37.9809	1.30957	144.946	42.2437	47.3716	25.1259
PSMD9	chr12_121894765_121894784_-	740.195	467.017	125.644	104.614	286.797	53.2455	76.8068	134.108	280.954
SLK	chr10_103998908_103998927_+	98.0209	137.847	88.9977	85.2904	0.654787	23.6647	38.4034	111.423	166.745
CREBBP	chr16_3793475_3793494_-	302.307	431.367	230.347	51.3075	118.516	8.87425	33.603	52.042	477.393
GNRH1	chr8_25423240_25423259_+	605.531	402.847	471.164	109.278	161.078	278.06	70.0862	342.276	580.181
LIPE	chr19_42407355_42407374_-	94.3565	381.457	115.173	266.533	265.189	221.856	165.615	203.498	214.713
CDK9	chr9_127788649_127788668_-	840.048	226.973	424.048	303.847	145.363	289.892	296.186	551.779	262.68
BAZ2B	chr2_159428347_159428366_-	3.66433	169.932	78.5274	11.3276	73.3361	73.9521	59.5253	67.3878	63.9569
VWF	chr12_6058018_6058037_+	264.748	46.3452	47.1164	371.813	334.596	147.904	210.739	156.793	216.997
CAMK1D	chr10_12349903_12349922_-	220.776	15.4484	230.347	394.468	79.884	272.144	80.6471	147.452	75.3778
SYK	chr9_90862207_90862226_+	233.601	7.13003	240.817	241.878	240.961	278.06	252.502	151.456	146.187
HTR3E	chr3_184105933_184105952_+	179.552	242.421	319.345	151.257	312.333	224.814	385.954	274.889	276.385
PRKCD	chr3_53192137_53192156_+	100.769	0	26.1758	135.932	157.149	5.91616	12.9611	18.0146	18.2734
VIPR2	chr7_159035984_159036003_+	636.677	742.712	277.463	255.871	462.279	295.808	113.29	230.186	319.785
TOP1	chr20_41076252_41076271_+	152.07	60.6053	20.9406	42.6452	15.7149	2.95808	15.8414	15.3457	0
PAK2	chr3_196803012_196803031_+	2.74825	15.4484	120.409	81.2924	83.8127	32.5389	87.8478	84.0679	54.8202
CA13	chr8_85259408_85259427_+	100.769	187.758	68.0571	208.562	223.937	124.239	217.939	272.887	173.597
RPL37A	chr2_216499987_216500006_+	14.6573	191.323	444.988	72.6301	142.743	20.7066	0	110.089	2.28418
NPR2	chr9_35808517_35808536_+	63.2097	225.784	62.8219	599.032	195.126	112.407	76.3267	89.4056	123.346
CLU	chr8_27605133_27605152_+	26.5664	95.0671	57.5867	201.898	30.775	144.946	170.415	114.092	98.2196
ROSA26	chr3_9378467_9378486_-	224.44	0	20.9406	91.9537	0	91.7006	118.09	104.084	230.702
ADRA1B	chr5_159917598_159917617_+	1.83217	1.18834	5.23516	0	0	76.9101	69.6061	13.3441	9.1367
PDE7B	chr6_136147461_136147480_-	475.447	357.69	329.815	141.262	380.431	387.509	116.17	230.186	180.45
CLK4	chr5_178613779_178613798_+	420.482	714.192	361.226	317.174	301.857	585.7	757.987	397.655	326.637
CD28	chr2_203726807_203726826_+	0	111.704	167.525	41.3125	47.7994	44.3712	62.4055	78.7303	105.072
SRD5A1	chr5_6651887_6651906_-	294.063	200.829	26.1758	199.899	35.3585	35.497	44.1639	79.3975	89.0829
PRSS3	chr9_33797855_33797874_+	0	78.4303	47.1164	102.615	45.1803	44.3712	96.0085	52.042	59.3886
MKNK1	chr1_46565026_46565045_+	305.972	324.416	225.112	329.834	834.198	446.67	214.099	328.932	374.605
MBTPS1	chr16_84070660_84070679_+	13.7412	396.905	83.7625	69.2985	161.732	5.91616	37.9233	158.128	11.4209
MTTP	chr4_99582074_99582093_+	77.867	194.888	0	119.273	142.089	165.653	234.741	156.793	175.882
PRKCB	chr16_24123832_24123851_+	360.937	108.139	251.288	337.164	211.496	233.689	255.383	259.543	452.267
HIPK2	chr7_139716628_139716647_-	278.489	1.18834	47.1164	826.251	716.337	212.982	247.702	238.192	212.428
CERK	chr22_46712185_46712204_+	414.985	677.353	413.577	352.489	331.322	310.599	284.665	241.528	219.281
FPR3	chr19_51823813_51823832_-	112.678	207.959	57.5867	31.3176	71.3717	50.2874	131.052	118.763	98.2196
TNF	chr6_GL000254v2_alt_2918468_2918487_-	0.916083	43.9685	120.409	281.192	317.572	109.449	210.739	187.485	424.857
TRAP1	chr16_3677540_3677559_-	5.4965	331.546	109.938	140.596	23.5723	133.114	162.734	70.0566	91.367
TASP1	chr20_13534112_13534131_-	95.2726	160.426	643.924	244.544	113.278	461.461	218.899	382.976	276.385
GCK	chr7_44145684_44145703_-	271.16	211.524	31.4109	104.614	9.16701	29.5808	83.0473	90.74	50.2519
ATP1A2	chr1_160130459_160130478_+	163.979	64.1703	62.8219	77.2944	79.884	20.7066	60.4853	50.0404	118.777
NAE1	chr16_66821451_66821470_-	0	0	0	56.6382	0	14.7904	0.480042	0	0
PREP	chr6_105352974_105352993_-	123.671	207.959	266.993	432.449	247.509	511.748	252.022	226.183	354.047
CCT2	chr12_69587944_69587963_+	8.24474	152.107	177.995	0	0	76.9101	115.21	0	27.4101
ROS1	chr6_117365617_117365636_+	436.971	149.731	15.7055	103.948	0	278.06	182.896	144.116	242.123
CACNA2D1	chr7_82005754_82005773_+	80.6153	2.37668	193.701	99.2834	37.3228	331.305	424.837	156.126	221.565
BLK	chr8_11549081_11549100_-	6.41258	462.264	497.34	623.02	1024.09	325.389	348.991	571.795	411.152
SLC6A2	chr16_55691936_55691955_-	119.091	54.6636	596.808	261.868	129.648	221.856	217.939	356.288	216.997
ATAD2B	chr2_23885783_23885802_-	322.461	159.237	41.8813	13.3266	14.4053	5.91616	33.1229	33.3603	22.8418
HTR1D	chr1_23194039_23194058_+	125.503	45.1569	104.703	240.546	125.064	141.988	143.533	144.116	171.313
SLK	chr10_104003311_104003330_-	0.916083	1.18834	5.23516	61.9688	66.7882	70.994	7.68068	126.102	102.788
P2RX2	chr12_132621065_132621084_+	258.335	0	193.701	123.938	0	82.8263	96.4885	54.7109	43.3993
PSMB11	chr14_23042533_23042552_+	0	0	15.7055	82.6251	197.091	141.988	102.249	18.0146	2.28418
CSK	chr15_74799305_74799324_+	12.8252	392.152	502.575	314.508	548.711	97.6167	84.9675	236.191	306.08
OPRK1	chr8_53250823_53250842_-	8.24474	0	120.409	289.854	259.95	272.144	324.509	247.533	363.184
PPARA	chr22_46218380_46218399_+	392.999	286.39	10.4703	295.851	407.277	218.898	145.453	99.4136	251.259
PIK3CB	chr3_138694778_138694797_+	131.916	118.834	136.114	463.1	379.121	215.94	242.901	410.999	484.245
MMP16	chr8_88327076_88327095_-	110.846	36.8385	109.938	291.187	140.124	35.497	47.5242	57.3797	84.5145
HRH1	chr3_11259183_11259202_+	695.307	257.869	314.109	309.178	784.434	156.778	193.457	439.689	322.069
ENTPD1	chr10_95844560_95844579_+	184.133	0	15.7055	240.546	56.9664	79.8682	70.5662	109.422	134.766
KLK5	chr19_50949909_50949928_-	569.803	203.206	413.577	876.892	468.172	567.952	228.02	495.734	294.659
SLC6A7	chr5_150205521_150205540_-	537.741	659.528	5.23516	162.585	241.616	402.299	55.2049	10.0081	9.1367
MCHR2	chr6_99955967_99955986_+	1.83217	97.4438	26.1758	8.66231	47.7994	29.5808	25.9223	43.3684	15.9892
FZD2	chr17_44557922_44557941_-	235.433	5.94169	293.169	270.531	397.456	118.323	102.249	32.6931	237.554
ST14	chr11_130194666_130194685_-	92.5244	24.9551	157.055	233.882	252.748	402.299	517.006	230.853	312.932
CYP51A1	chr7_92128877_92128896_-	593.622	122.399	136.114	273.862	267.808	233.689	123.371	232.855	116.493
KCNH6	chr17_63524212_63524231_+	353.608	390.963	460.694	40.6462	11.1314	171.569	120.491	193.49	105.072
BCL2	chr18_63318199_63318218_+	0	0	188.466	27.3196	123.1	62.1197	61.4454	133.441	50.2519
MPO	chr17_58279897_58279916_+	455.293	557.331	303.639	553.055	1004.44	417.09	152.173	181.48	454.551
PIK3CG	chr7_106868853_106868872_-	300.475	148.542	465.929	61.3025	261.26	346.096	258.263	133.441	187.302
CTSF	chr11_66564621_66564640_+	340.783	8.31837	219.877	185.24	1.30957	375.676	172.335	357.622	130.198
KCNA7	chr19_49072360_49072379_-	345.363	645.268	251.288	246.543	427.576	275.102	309.627	599.151	187.302
TGFBR1	chr9_99142655_99142674_-	1090.14	285.201	685.806	474.428	792.947	671.485	371.553	215.507	468.256
PDGFC	chr4_156767770_156767789_-	62.2936	166.367	47.1164	180.576	7.20265	53.2455	10.0809	43.3684	121.061
TNFRSF4	chr1_1213661_1213680_+	585.377	644.08	177.995	161.252	187.924	431.88	433.478	72.0582	107.356
MAPK10	chr4_86159342_86159361_+	234.517	15.4484	235.582	351.157	840.746	375.676	328.349	202.163	228.418
TUBB3	chr16_89935007_89935026_-	251.923	431.367	256.523	167.249	60.2404	141.988	122.411	141.448	148.471
C3AR1	chr12_8059885_8059904_+	416.818	127.152	62.8219	235.215	132.922	50.2874	223.22	68.055	29.6943
HCK	chr20_32073745_32073764_-	500.181	200.829	52.3516	201.898	150.601	59.1616	53.7647	100.748	169.029
HDAC8	chrX_72495207_72495226_-	0.916083	76.0537	5.23516	120.606	32.0845	20.7066	25.9223	96.0776	25.1259
SLCO1C1	chr12_20717194_20717213_+	2.74825	125.964	99.468	97.2844	48.4542	8.87425	32.6429	52.042	111.925
MSTN	chr2_190060140_190060159_-	141.077	396.905	120.409	361.818	35.3585	139.03	61.4454	118.095	68.5253
NDUFS6	chr5_1802353_1802372_+	323.377	149.731	141.349	189.238	170.899	195.233	141.612	306.915	125.63
NTRK3	chr15_88136563_88136582_-	869.363	1.18834	36.6461	94.6191	65.4787	38.4551	106.089	121.431	38.831
PTCH1	chr9_95461861_95461880_+	59.5454	386.21	10.4703	91.2874	24.8819	242.563	184.816	72.7254	372.321
RAD51	chr15_40718799_40718818_+	234.517	77.242	78.5274	0	0	20.7066	18.7217	104.751	15.9892
CACNB1	chr17_39194896_39194915_+	112.678	366.008	41.8813	58.6372	107.385	384.551	211.219	92.7416	164.461
CCR5	chr3_46373516_46373535_-	96.1887	117.646	345.52	243.211	449.838	375.676	389.794	297.574	484.245
PDGFRB	chr5_150135630_150135649_+	10.0769	243.609	397.872	497.75	863.009	585.7	336.51	325.596	280.954
CD248	chr11_66314972_66314991_-	3.66433	226.973	225.112	345.826	204.293	8.87425	74.8866	252.871	11.4209
NDUFB7	chr19_14566796_14566815_-	369.181	383.833	266.993	217.224	189.888	212.982	230.42	451.698	598.454
CA9	chr9_35676080_35676099_-	358.188	1.18834	109.938	159.92	58.9308	35.497	37.4433	15.3457	127.914
MIP	chr12_56453662_56453681_-	93.4404	336.3	177.995	146.593	257.331	41.4132	129.131	93.4088	34.2626
SLC6A9	chr1_44000758_44000777_+	134.664	373.138	172.76	107.279	61.5499	32.5389	39.3635	86.0695	31.9785
CACNG6	chr19_53993045_53993064_+	685.23	87.9371	230.347	222.555	213.46	204.108	202.098	193.49	502.519
GSTP1	chr11_67584138_67584157_-	58.6293	499.102	209.406	419.122	534.961	141.988	113.77	79.3975	226.133
CYP1A2	chr15_74750330_74750349_-	123.671	394.528	188.466	226.553	0	322.431	412.836	330.934	212.428
PDCD1	chr2_241852751_241852770_-	243.678	154.484	193.701	257.204	336.56	538.371	415.237	469.046	260.396
IDI1	chr10_1044000_1044019_-	3.66433	288.766	104.703	85.9567	9.8218	192.275	58.5652	92.0744	191.871
LPAR5	chr12_6620488_6620507_-	32.0629	11.8834	78.5274	584.373	1109.86	387.509	287.545	188.152	182.734
RRM1	chr11_4121732_4121751_+	218.944	108.139	73.2922	150.591	17.0245	29.5808	62.8855	70.7238	79.9462
IL2RG	chrX_71110892_71110911_+	0.916083	149.731	47.1164	1.99899	92.9797	177.485	124.811	68.7222	216.997
RPS6KB1	chr17_59935186_59935205_+	376.51	0	68.0571	0	0	53.2455	102.249	111.423	15.9892
SGK3	chr8_66828663_66828682_+	358.188	654.775	31.4109	165.25	409.242	198.192	56.645	240.194	203.292
RAF1	chr3_12618516_12618535_-	293.146	1.18834	68.0571	21.3226	36.6681	144.946	130.091	78.7303	38.831
RBBP9	chr20_18495875_18495894_-	8.24474	847.285	324.58	195.235	176.792	153.82	312.028	171.472	527.645
CSNK1G2	chr19_1978965_1978984_-	319.713	109.327	235.582	320.505	583.415	266.227	296.666	202.163	415.72
GJB2	chr13_20189414_20189433_+	318.797	49.9102	120.409	31.3176	87.7414	17.7485	24.9622	97.412	59.3886
KCNA3	chr1_110674281_110674300_+	726.454	71.3003	418.813	360.485	584.07	526.539	235.221	483.057	125.63
GART	chr21_33528847_33528866_-	149.321	64.1703	20.9406	89.9547	26.1915	20.7066	1.44013	40.6995	22.8418
SCN11A	chr3_38904023_38904042_+	13.7412	653.586	272.228	591.702	569.664	198.192	445.479	391.65	379.173
ROSA26	chr3_9376520_9376539_+	1.83217	5.94169	68.0571	186.573	302.511	115.365	220.339	105.418	264.964
SMG1	chr16_18882198_18882217_-	696.223	307.78	204.171	160.586	174.173	275.102	365.312	481.722	390.594
SLC12A2	chr5_128138869_128138888_+	282.153	173.497	15.7055	72.6301	164.351	20.7066	115.21	92.0744	77.662
OPRK1	chr8_53229775_53229794_-	167.643	251.928	329.815	193.902	470.792	239.605	288.505	253.538	185.018
ADAMTS1	chr21_26838561_26838580_+	147.489	167.556	272.228	27.9859	56.9664	139.03	26.4023	138.112	228.418
ROSA26	chr3_9365097_9365116_-	150.238	134.282	125.644	189.238	84.4675	139.03	186.256	53.3765	267.249
TYMS	chr18_669152_669171_+	147.489	142.601	94.2328	13.993	0	0	6.24055	58.0469	134.766
CYP1B1	chr2_38074459_38074478_-	524.915	495.537	99.468	283.191	157.804	269.185	242.901	272.887	315.216
VARS	chr6_GL000254v2_alt_3124276_3124295_+	203.37	281.636	83.7625	52.6402	0	38.4551	81.6072	56.7125	0
LAP3	chr4_17583621_17583640_+	98.9369	401.658	136.114	117.274	298.583	115.365	118.09	149.454	130.198
PAK1	chr11_77340688_77340707_+	336.202	196.076	544.456	387.139	341.144	357.928	252.022	407.663	461.404
AKT1	chr14_104780103_104780122_+	225.356	47.5335	120.409	192.57	382.395	313.557	250.102	416.336	486.53
CENPE	chr4_103198275_103198294_+	142.909	171.121	162.29	54.6392	0	11.8323	31.6828	52.042	11.4209
PSMA5	chr1_109415238_109415257_-	185.049	0	15.7055	0	0	0	5.76051	28.0226	45.6835
IL22	chr12_68252773_68252792_-	3.66433	121.211	198.936	108.612	47.7994	115.365	160.334	82.7335	146.187
ROSA26	chr3_9376416_9376435_-	4.58041	1.18834	225.112	122.605	134.886	171.569	96.4885	176.142	260.396
CDK20	chr9_87970582_87970601_-	720.041	638.138	209.406	241.212	24.8819	177.485	423.397	390.315	251.259
KDM4A	chr1_43671770_43671789_+	260.167	225.784	52.3516	123.271	68.7526	65.0778	87.3677	246.866	95.9354
PCSK5	chr9_76023761_76023780_-	5.4965	253.116	83.7625	190.571	113.278	189.317	84.9675	104.751	20.5576
FLT3	chr13_28052551_28052570_-	17.4056	4.75335	136.114	18.6573	92.3249	59.1616	146.413	29.357	185.018
AQP3	chr9_33442483_33442502_+	6.41258	118.834	57.5867	165.917	142.089	100.575	103.209	74.727	196.439
UCHL3	chr13_75566794_75566813_-	346.279	1.18834	20.9406	103.948	11.1314	141.988	138.732	208.168	214.713
KCNA4	chr11_30011965_30011984_-	41.2237	216.278	26.1758	1.99899	0	29.5808	83.0473	63.3845	45.6835
CH25H	chr10_89207196_89207215_+	124.587	232.914	335.05	88.6221	472.756	375.676	268.344	223.514	118.777
PDE2A	chr11_72590229_72590248_-	174.972	300.65	41.8813	86.6231	400.075	127.198	69.1261	97.412	121.061
IL5RA	chr3_3097862_3097881_+	245.51	96.2554	83.7625	129.268	96.9084	29.5808	141.612	52.042	82.2303
ABCB11	chr2_168944737_168944756_+	0	73.677	261.758	115.275	56.3117	88.7425	118.09	84.7351	59.3886
CYP27B1	chr12_57765408_57765427_+	249.175	336.3	109.938	153.923	32.7393	44.3712	69.1261	83.4007	9.1367
DRD2	chr11_113424536_113424555_+	175.888	0	335.05	245.876	186.614	171.569	246.742	256.207	244.407
ADA	chr20_44621066_44621085_+	109.014	234.103	308.874	331.167	364.716	195.233	108.01	166.134	171.313
AHCY	chr20_34290432_34290451_-	5.4965	3.56502	146.584	41.9789	3.92872	17.7485	63.8456	140.78	43.3993
KCNG2	chr18_79863971_79863990_+	35.7272	439.685	429.283	387.139	198.4	275.102	121.931	126.769	269.533
ADAM12	chr10_126101210_126101229_-	99.853	212.713	162.29	137.931	3.92872	121.281	82.5673	48.706	63.9569
PSMA3	chr14_58247765_58247784_-	232.685	0	73.2922	0	0	85.7844	139.212	50.7076	52.536
FNTB	chr14_65004254_65004273_+	3.66433	3.56502	62.8219	76.6281	26.8463	17.7485	9.60085	38.0307	11.4209
PLD2	chr17_4815534_4815553_+	387.503	20.2018	355.991	93.2864	612.88	183.401	79.687	318.257	237.554
TYK2	chr19_10353030_10353049_+	808.901	67.7353	62.8219	296.517	879.378	449.629	265.463	213.506	178.166
LNPEP	chr5_97006432_97006451_-	229.937	127.152	193.701	107.946	355.549	260.311	219.379	118.095	226.133
CACNA1A	chr19_13286497_13286516_+	386.587	1182.4	214.641	449.107	564.426	434.838	318.748	293.57	491.098
VKORC1	chr16_31091191_31091210_+	448.881	323.228	52.3516	49.9749	0	133.114	116.17	8.00647	155.324
TAOK3	chr12_118181372_118181391_-	154.818	104.574	94.2328	23.9879	195.126	26.6227	70.0862	70.0566	27.4101
METAP2	chr12_95476106_95476125_-	6.41258	248.363	151.82	11.994	60.8952	103.533	0.480042	26.021	9.1367
RRM2	chr2_10123479_10123498_+	1.83217	55.8519	5.23516	0	0	26.6227	43.2038	0	9.1367
LYN	chr8_55966716_55966735_+	84.2796	159.237	125.644	96.6181	33.3941	106.491	38.4034	26.6882	36.5468
CTLA4	chr2_203870879_203870898_+	7.32866	688.048	293.169	133.266	257.986	455.545	209.298	597.149	404.299
NDUFB5	chr3_179617010_179617029_+	251.007	426.614	429.283	105.28	37.9776	227.772	171.375	140.78	105.072
DGAT1	chr8_144318830_144318849_+	129.168	213.901	261.758	119.273	290.07	189.317	247.702	188.819	130.198
FGA	chr4_154587513_154587532_-	193.293	1.18834	104.703	144.594	114.588	109.449	61.4454	72.0582	260.396
STK38L	chr12_27315103_27315122_-	11.9091	38.0268	120.409	22.6553	7.20265	186.359	44.6439	166.801	182.734
PBK	chr8_27810417_27810436_+	113.594	38.0268	73.2922	77.2944	89.7058	130.156	190.577	56.7125	84.5145
CTSB	chr8_11847107_11847126_-	93.4404	0	141.349	175.911	63.5143	100.575	167.055	72.0582	143.903
AGTR2	chrX_116172689_116172708_-	71.4545	300.65	68.0571	123.271	169.59	35.497	155.054	89.4056	185.018
C1QB	chr1_22659513_22659532_+	256.503	97.4438	177.995	167.916	188.579	372.718	139.692	222.179	2.28418
GRIN2B	chr12_13865854_13865873_+	13.7412	1082.58	314.109	201.898	304.476	328.347	294.266	110.089	404.299
AAVS1	chr19_55228070_55228089_-	458.957	476.524	314.109	331.167	531.032	301.724	223.7	490.396	619.012
ERAP2	chr5_96896483_96896502_+	134.664	101.009	73.2922	91.2874	15.0601	35.497	44.6439	85.4023	139.335
SLC6A5	chr11_20628013_20628032_+	23.8182	255.493	88.9977	151.924	11.7862	278.06	284.665	155.459	137.051
CCR2	chr3_46358112_46358131_-	0	4.75335	88.9977	241.212	28.8106	97.6167	161.294	142.782	91.367
TUBA1B	chr12_49129517_49129536_+	12.8252	261.434	104.703	103.281	5.23829	5.91616	43.6839	66.7206	82.2303
CENPE	chr4_103143390_103143409_-	166.727	99.8204	0	11.994	60.8952	8.87425	61.9255	38.6979	20.5576
CYP1A2	chr15_74749885_74749904_-	411.321	356.502	62.8219	169.248	128.338	198.192	83.5274	331.601	169.029
AAVS1	chr19_55113733_55113752_+	56.7971	27.3318	109.938	63.9678	123.1	23.6647	2.88025	7.33926	31.9785
HTR5A	chr7_155071572_155071591_+	266.58	197.264	266.993	165.25	286.797	378.635	317.308	277.558	513.94
HTR1A	chr5_63961547_63961566_-	1.83217	224.596	188.466	284.524	4.58351	79.8682	23.042	358.957	221.565
AAVS1	chr19_55242989_55243008_+	381.09	13.0717	73.2922	147.259	62.2047	85.7844	82.5673	72.7254	386.026
CTSV	chr9_97036625_97036644_-	422.314	652.398	266.993	288.521	452.458	360.886	486.283	408.997	157.608
P2RY10	chrX_78960784_78960803_-	0	0	136.114	64.6341	20.9532	11.8323	2.88025	24.0194	0
STK31	chr7_23729238_23729257_-	220.776	104.574	130.879	175.911	38.6324	109.449	140.172	118.763	198.723
ABL2	chr1_179114915_179114934_-	202.454	154.484	167.525	191.237	136.85	103.533	55.2049	101.415	57.1044
PCSK9	chr1_55046537_55046556_-	284.902	74.8653	83.7625	115.275	0.654787	195.233	203.538	327.598	221.565
ERBB3	chr12_56083821_56083840_+	228.105	197.264	460.694	151.257	0	183.401	171.855	168.136	237.554
C1S	chr12_7065286_7065305_-	2.74825	1.18834	5.23516	153.256	257.331	221.856	177.616	51.3748	260.396
NLK	chr17_28172583_28172602_+	313.3	0	10.4703	69.9648	0	8.87425	37.9233	88.7383	15.9892
PDE8B	chr5_77329025_77329044_+	293.146	371.95	314.109	253.872	178.102	207.066	125.771	227.517	267.249
APOB	chr2_21008298_21008317_-	0.916083	35.6502	41.8813	29.3186	132.267	17.7485	0.480042	72.0582	0
CTRC	chr1_15442447_15442466_+	224.44	284.013	476.399	283.191	341.144	242.563	344.19	256.207	322.069
ADRB1	chr10_114044374_114044393_+	308.72	279.26	193.701	347.825	901.641	133.114	160.814	110.089	363.184
GABRA3	chrX_152284669_152284688_-	65.0419	356.502	57.5867	81.9588	148.637	121.281	209.779	151.456	413.436
TYK2	chr19_10365735_10365754_-	69.6223	325.605	78.5274	167.249	431.504	106.491	227.06	360.958	164.461
RPL4	chr15_66503139_66503158_-	96.1887	268.565	99.468	3.33166	138.16	44.3712	107.049	123.433	121.061
KCNA5	chr12_5045135_5045154_-	706.3	707.061	581.103	623.02	578.177	340.179	347.071	188.152	182.734
SLC18A2	chr10_117255286_117255305_-	255.587	0	120.409	182.575	197.091	112.407	176.176	74.727	251.259
AAVS1	chr19_55195924_55195943_+	10.993	0	57.5867	106.613	109.349	133.114	152.173	107.42	153.04
SRPK3	chrX_153783976_153783995_+	335.286	475.335	47.1164	129.268	287.451	198.192	149.773	18.6818	47.9677
CD3D	chr11_118340521_118340540_-	89.7761	0	109.938	3.33166	36.0133	73.9521	163.214	13.3441	38.831
TBCD	chr17_82905963_82905982_+	8.24474	140.224	167.525	57.3045	283.523	177.485	144.013	48.0388	98.2196
GRIN3A	chr9_101686833_101686852_+	258.335	234.103	198.936	123.938	0	289.892	281.785	156.793	342.626
MCL1	chr1_150577450_150577469_-	0.916083	146.166	10.4703	16.6583	0	0	0	0.667206	0
KARS	chr16_75641588_75641607_+	327.042	104.574	277.463	157.254	81.8483	109.449	128.171	126.769	31.9785
CLK3	chr15_74627559_74627578_+	219.86	200.829	78.5274	81.2924	129.648	127.198	189.137	34.0275	79.9462
UBA1	chrX_47206263_47206282_-	376.51	0	125.644	7.99598	1.96436	14.7904	7.68068	44.7028	59.3886
ENPP2	chr8_119617214_119617233_-	21.0699	696.366	256.523	52.6402	92.3249	133.114	212.659	94.076	130.198
GABRA3	chrX_152208087_152208106_-	11.9091	99.8204	256.523	157.254	269.772	91.7006	100.329	228.184	125.63
SLC8A3	chr14_70166727_70166746_+	511.174	595.358	387.402	445.776	504.841	233.689	185.296	241.528	248.975
ROSA26	chr3_9383032_9383051_-	8.24474	97.4438	0	0	0	0	23.5221	38.0307	109.64
HMGCR	chr5_75359287_75359306_-	306.888	2.37668	162.29	81.9588	0	2.95808	44.6439	32.6931	2.28418
HTR2C	chrX_114731547_114731566_-	2.74825	148.542	47.1164	24.6543	0	47.3293	90.248	29.357	102.788
SSTR3	chr22_37207000_37207019_+	199.706	292.331	256.523	316.507	477.339	298.766	226.58	372.968	91.367
CHRM3	chr1_239907914_239907933_-	253.755	552.577	198.936	91.2874	41.2516	186.359	247.702	64.0517	66.2411
PRKCH	chr14_61445705_61445724_+	5.4965	71.3003	73.2922	155.922	404.658	156.778	140.652	66.0534	260.396
SLC15A2	chr3_121928990_121929009_-	192.377	260.246	130.879	141.929	51.7281	195.233	250.102	162.131	326.637
TAAR1	chr6_132645506_132645525_-	39.3916	33.2735	31.4109	135.265	0	76.9101	45.124	64.0517	84.5145
NOD1	chr7_30451604_30451623_-	0	1.18834	52.3516	633.015	689.49	82.8263	58.5652	160.797	18.2734
IDH1	chr2_208248410_208248429_+	662.328	672.6	277.463	197.234	447.874	281.018	385.474	353.619	408.868
ADH1C	chr4_99343046_99343065_-	13.7412	180.627	83.7625	225.886	232.449	357.928	199.698	142.115	25.1259
ADRA2C	chr4_3766729_3766748_-	1173.5	212.713	460.694	393.802	279.594	360.886	486.283	541.771	363.184
AKT2	chr19_40242603_40242622_-	287.65	215.089	177.995	56.6382	316.262	239.605	153.134	142.782	303.795
PRMT3	chr11_20494186_20494205_+	208.867	2.37668	115.173	280.526	367.335	70.994	109.93	176.142	15.9892
PSMD1	chr2_231083742_231083761_+	40.3076	507.421	125.644	256.538	375.193	236.647	415.237	351.617	831.44
SUPV3L1	chr10_69198396_69198415_-	378.342	472.959	162.29	37.3146	0	14.7904	64.3257	90.74	15.9892
SGMS1	chr10_50308043_50308062_-	383.839	224.596	115.173	239.879	218.044	464.419	347.551	160.797	294.659
ITGB1	chr10_32923713_32923732_-	1.83217	178.251	130.879	97.2844	62.2047	192.275	86.4076	166.801	271.817
SENP8	chr15_72139840_72139859_-	107.182	140.224	146.584	208.562	187.269	97.6167	155.534	274.222	70.8095
MS4A1	chr11_60463060_60463079_-	23.8182	19.0134	78.5274	79.9598	525.794	440.754	455.56	167.469	47.9677
CCR5	chr3_46372769_46372788_+	224.44	141.412	88.9977	145.26	710.444	159.736	430.118	143.449	390.594
CHRNE	chr17_4902033_4902052_-	74.2027	747.465	581.103	303.847	525.139	591.616	361.952	277.558	440.846
GP1BA	chr17_4933595_4933614_-	183.217	317.286	146.584	130.601	1.96436	97.6167	168.495	92.7416	79.9462
CACNA2D3	chr3_54123529_54123548_-	130.084	158.049	157.055	182.575	123.755	369.76	321.148	112.091	75.3778
DEPTOR	chr8_119928542_119928561_+	258.335	8.31837	183.231	119.273	58.9308	224.814	211.219	103.417	109.64
EGLN2	chr19_40801107_40801126_-	10.0769	32.0851	413.577	332.499	424.957	144.946	118.57	92.7416	139.335
TNIK	chr3_171188796_171188815_-	14.6573	65.3586	83.7625	0	3.27393	186.359	84.4875	116.761	22.8418
PTGDR2	chr11_60853264_60853283_+	103.517	380.268	151.82	110.611	214.115	340.179	161.294	127.436	205.576
AAVS1	chr19_55117652_55117671_-	265.664	137.847	162.29	197.9	1.30957	68.0359	104.169	229.519	70.8095
EGFL7	chr9_136668335_136668354_+	4.58041	40.4035	282.699	239.879	98.218	65.0778	158.894	136.11	93.6512
RPS6KB1	chr17_59926528_59926547_+	379.258	14.2601	20.9406	153.923	93.6345	88.7425	100.329	104.084	57.1044
ABCB1	chr7_87570206_87570225_-	397.58	86.7487	57.5867	254.539	41.2516	207.066	301.947	335.604	84.5145
HRH1	chr3_11259554_11259573_-	1.83217	1.18834	287.934	187.239	173.518	139.03	109.45	141.448	721.8
PDE1A	chr2_182223895_182223914_-	103.517	147.354	5.23516	83.9578	37.9776	124.239	35.5231	63.3845	34.2626
FDFT1	chr8_11831572_11831591_+	312.384	286.39	130.879	162.585	110.659	230.73	195.857	98.0792	137.051
APOB	chr2_21015091_21015110_-	830.887	379.08	193.701	318.506	586.034	411.173	245.302	386.979	347.195
IMPDH1	chr7_128397010_128397029_-	215.279	396.905	753.863	259.203	468.172	272.144	216.019	207.501	262.68
LINGO1	chr15_77615198_77615217_-	272.077	487.219	251.288	162.585	375.848	239.605	248.182	200.829	404.299
GRIA1	chr5_153770381_153770400_+	174.972	368.385	172.76	133.933	183.995	35.497	89.7679	168.136	157.608
EPHA2	chr1_16135141_16135160_+	2.74825	156.861	167.525	221.888	388.288	292.85	274.104	260.877	399.731
KLK7	chr19_50979886_50979905_+	275.741	329.17	162.29	391.137	244.235	295.808	451.24	347.614	98.2196
RPS6KA1	chr1_26554724_26554743_-	138.328	196.076	141.349	181.908	128.993	322.431	342.75	343.611	724.084
SLC29A1	chr6_44230594_44230613_-	8.24474	108.139	94.2328	58.6372	77.9196	112.407	60.0053	58.0469	308.364
SERPINC1	chr1_173914592_173914611_+	1.83217	47.5335	109.938	104.614	129.648	85.7844	159.854	98.7464	86.7987
FASN	chr17_82080769_82080788_+	247.342	149.731	26.1758	155.922	0	70.994	74.4066	34.6947	100.504
PDGFC	chr4_156810960_156810979_-	14.6573	0	94.2328	207.895	242.271	168.611	262.103	165.467	203.292
LNPEP	chr5_96996423_96996442_+	319.713	0	172.76	56.6382	64.8239	11.8323	50.8845	253.538	57.1044
LPAR3	chr1_84814019_84814038_+	96.1887	110.515	188.466	105.28	331.977	121.281	74.4066	58.0469	251.259
AAVS1	chr19_55158961_55158980_+	2.74825	52.2869	57.5867	51.3075	0.654787	56.2036	75.8467	96.0776	89.0829
GJA8	chr1_147908507_147908526_+	605.531	140.224	193.701	314.508	326.084	207.066	283.705	421.007	392.878
CD14	chr5_140632636_140632655_+	263.832	438.497	125.644	121.939	153.22	292.85	366.752	217.509	452.267
TXNRD1	chr12_104321131_104321150_-	170.391	192.511	230.347	80.6261	72.0265	50.2874	27.3624	66.0534	89.0829
VEGFC	chr4_176711621_176711640_-	241.846	51.0986	188.466	200.566	507.46	233.689	172.815	160.797	324.353
ANGPT2	chr8_6519894_6519913_+	1041.59	111.704	188.466	229.884	313.643	479.209	309.147	343.611	162.177
KAT5	chr11_65714688_65714707_-	134.664	14.2601	266.993	33.3166	3.27393	32.5389	27.3624	159.462	312.932
CACNA2D1	chr7_81982568_81982587_-	413.153	0	41.8813	7.99598	0.654787	35.497	86.4076	1.33441	75.3778
SERPINC1	chr1_173909821_173909840_-	246.426	206.771	361.226	600.365	427.576	390.467	314.908	240.861	449.983
NOL9	chr1_6541853_6541872_+	0.916083	142.601	20.9406	22.6553	95.5989	20.7066	25.4422	38.0307	6.85253
ENTPD2	chr9_137051557_137051576_-	133.748	134.282	125.644	25.9869	340.489	201.15	184.816	106.086	235.27
GRIK3	chr1_36890959_36890978_-	3.66433	3.56502	15.7055	129.268	8.51223	62.1197	149.293	47.3716	0
CDK16	chrX_47224497_47224516_+	2.74825	184.192	366.461	396.467	172.209	254.395	295.226	752.608	219.281
PCSK7	chr11_117224200_117224219_-	991.202	478.9	371.696	384.473	359.478	340.179	192.977	421.674	399.731
MADCAM1	chr19_498763_498782_+	524.915	686.86	685.806	194.569	75.3005	221.856	145.933	324.929	214.713
TNFSF13	chr17_7559131_7559150_-	1285.26	1.18834	282.699	360.485	864.318	485.125	355.711	457.036	698.958
GNRH1	chr8_25423215_25423234_+	583.545	188.946	324.58	229.218	56.9664	3064.57	437.319	204.832	550.486
CCR5	chr3_46371356_46371375_-	292.23	40.4035	47.1164	57.9708	28.8106	38.4551	160.814	132.107	118.777
PIK3R1	chr5_68226844_68226863_+	3.66433	143.789	15.7055	42.6452	3.92872	41.4132	38.8834	122.766	100.504
RPL35	chr9_124860242_124860261_+	526.748	131.906	5.23516	145.26	1.30957	26.6227	20.1618	101.415	4.56835
PDE2A	chr11_72589927_72589946_+	216.196	546.636	188.466	393.802	297.273	76.9101	48.4843	88.7383	61.6728
HMGCR	chr5_75350274_75350293_-	839.132	298.273	225.112	389.138	520.555	485.125	519.406	495.067	287.806
EGLN3	chr14_33950687_33950706_+	15.5734	0	57.5867	243.211	233.104	174.527	147.853	251.537	146.187
PRMT8	chr12_3553686_3553705_+	30.2307	180.627	52.3516	93.9527	1.30957	325.389	240.501	50.7076	287.806
ATM	chr11_108268524_108268543_+	92.5244	168.744	125.644	104.614	348.347	263.269	304.827	216.842	324.353
ROSA26	chr3_9366587_9366606_+	412.237	0	225.112	255.871	426.921	434.838	440.679	332.268	210.144
PHKG1	chr7_56087695_56087714_-	568.887	247.174	209.406	321.838	168.28	189.317	206.418	184.149	171.313
F2	chr11_46723194_46723213_+	48.5524	76.0537	507.81	296.517	257.331	289.892	180.496	134.108	166.745
GRIK4	chr11_120961024_120961043_-	296.811	230.538	136.114	109.945	56.3117	103.533	63.8456	128.771	79.9462
CBR1	chr21_36071036_36071055_+	0	0	20.9406	175.911	139.47	2.95808	14.4013	80.0647	61.6728
GRIN3B	chr19_1004937_1004956_+	132.832	7.13003	115.173	9.99497	151.911	204.108	226.58	249.535	123.346
FXYD2	chr11_117822391_117822410_+	292.23	59.4169	246.052	45.3105	49.7638	112.407	18.7217	156.793	50.2519
KLKB1	chr4_186238295_186238314_-	0	103.385	272.228	204.564	0.654787	239.605	345.631	370.966	431.709
ROSA26	chr3_9374659_9374678_+	4.58041	274.506	41.8813	136.598	132.267	118.323	86.8877	203.498	118.777
ITPR3	chr6_33685781_33685800_-	11.9091	247.174	177.995	549.057	811.281	133.114	139.212	144.116	276.385
NCSTN	chr1_160357131_160357150_-	808.901	230.538	408.342	115.942	149.946	139.03	184.336	203.498	290.09
CYP2A6	chr19_40846026_40846045_+	18.3217	186.569	120.409	509.077	357.514	115.365	165.615	164.8	77.662
PDE3B	chr11_14786542_14786561_-	103.517	273.318	151.82	211.893	202.984	8.87425	93.6083	69.3894	79.9462
MAPKAP1	chr9_125467990_125468009_+	4.58041	72.4887	246.052	20.6563	0	44.3712	78.7269	38.0307	18.2734
LIMK1	chr7_74106187_74106206_+	137.412	123.587	162.29	329.834	166.971	127.198	113.29	225.516	488.814
EZH1	chr17_42718481_42718500_+	261.084	1.18834	83.7625	100.616	111.969	94.6586	26.8824	126.102	121.061
NDUFB10	chr16_1961535_1961554_+	0.916083	122.399	465.929	61.9688	68.0978	62.1197	21.1219	18.0146	6.85253
PLG	chr6_160731858_160731877_+	7.32866	13.0717	73.2922	17.9909	136.85	109.449	61.4454	190.821	77.662
CSNK1E	chr22_38314083_38314102_-	462.622	159.237	104.703	180.576	0.654787	70.994	97.4486	167.469	54.8202
C1S	chr12_7069933_7069952_-	1.83217	2.37668	219.877	223.887	68.0978	260.311	255.863	83.4007	292.375
PRSS1	chr7_142751863_142751882_-	91.6083	0	47.1164	67.9658	0	233.689	194.897	142.115	132.482
SGK2	chr20_43567942_43567961_+	42.1398	221.031	366.461	194.569	163.042	189.317	108.97	232.188	203.292
YES1	chr18_724595_724614_-	276.657	108.139	151.82	76.6281	176.792	349.054	168.015	206.834	271.817
LTA4H	chr12_96018799_96018818_+	291.314	250.739	361.226	157.254	254.057	523.581	305.307	184.149	194.155
RET	chr10_43111377_43111396_+	0.916083	300.65	88.9977	169.915	112.623	124.239	57.6051	102.75	59.3886
PSEN1	chr14_73192653_73192672_+	2.74825	3.56502	73.2922	315.175	239.652	139.03	271.224	296.907	264.964
NDUFA1	chrX_119871942_119871961_-	239.098	190.134	78.5274	33.3166	0	0	7.20064	0.667206	52.536
AAVS1	chr19_55242063_55242082_-	259.251	91.5021	104.703	220.556	534.306	411.173	686.941	285.564	228.418
SPHK1	chr17_76386094_76386113_-	390.251	61.7936	204.171	10.6613	6.54787	70.994	148.333	244.864	196.439
SUPV3L1	chr10_69197053_69197072_+	183.217	730.828	266.993	39.3136	250.783	153.82	171.855	52.042	235.27
MTNR1A	chr4_186555209_186555228_+	755.768	47.5335	240.817	124.604	49.109	553.161	408.036	170.137	292.375
PPWD1	chr5_65586041_65586060_+	272.077	80.807	20.9406	9.99497	27.501	103.533	22.562	99.4136	139.335
EHMT2	chr6_GL000254v2_alt_3229681_3229700_+	193.293	7.13003	104.703	19.3236	105.421	88.7425	56.645	37.3635	484.245
GABRA3	chrX_152208016_152208035_+	0	143.789	172.76	209.228	197.091	245.521	267.864	230.186	25.1259
LIMK1	chr7_74105971_74105990_-	242.762	133.094	397.872	255.871	521.865	307.641	372.033	182.147	447.699
KLKB1	chr4_186251492_186251511_+	0	0	36.6461	51.3075	0	73.9521	87.3677	56.7125	34.2626
ADRB1	chr10_114044814_114044833_-	705.384	240.044	120.409	450.44	232.449	210.024	382.594	208.835	274.101
RRM1	chr11_4107475_4107494_+	217.112	118.834	261.758	71.2975	106.73	94.6586	128.171	65.3862	18.2734
HNRNPK	chr9_83975448_83975467_+	8.24474	285.201	83.7625	28.6522	0	0	40.3236	64.0517	75.3778
S1PR2	chr19_10224264_10224283_+	217.112	16.6367	256.523	341.828	288.761	269.185	135.852	192.155	632.717
FZD2	chr17_44558481_44558500_-	713.628	147.354	523.516	557.719	296.618	393.425	664.859	216.842	173.597
PCSK1	chr5_96410826_96410845_+	387.503	3.56502	31.4109	157.254	318.881	59.1616	112.81	197.493	95.9354
DCPS	chr11_126343392_126343411_+	282.153	373.138	717.217	14.6593	45.1803	62.1197	68.6461	174.141	86.7987
CDC7	chr1_91507894_91507913_-	0.916083	45.1569	52.3516	18.6573	45.8351	26.6227	58.5652	38.6979	77.662
KLK3	chr19_50856250_50856269_-	294.979	243.609	266.993	189.904	130.303	331.305	301.947	443.025	324.353
MAP3K2	chr2_127335871_127335890_-	81.5314	0	52.3516	113.276	347.037	35.497	76.3267	45.37	100.504
GRM5	chr11_88567469_88567488_-	409.489	83.1837	198.936	354.488	311.024	144.946	205.458	171.472	125.63
NPY1R	chr4_163326427_163326446_+	256.503	85.5604	125.644	274.529	132.922	70.994	31.6828	230.186	98.2196
CCR5	chr3_46373987_46374006_-	181.384	116.457	57.5867	11.3276	172.209	363.844	220.819	131.44	164.461
HTR2B	chr2_231113891_231113910_+	227.189	8.31837	308.874	151.924	0	32.5389	64.8057	25.3538	9.1367
EPHA5	chr4_65495513_65495532_+	100.769	175.874	15.7055	109.278	76.61	68.0359	78.7269	134.108	22.8418
NDUFV3	chr21_42903182_42903201_+	3.66433	1.18834	204.171	79.2934	326.084	82.8263	72.0064	97.412	139.335
CHRNG	chr2_232540040_232540059_+	239.098	313.721	88.9977	151.924	15.0601	239.605	343.71	180.813	29.6943
ESR1	chr6_152098783_152098802_-	507.51	30.8968	361.226	17.3246	0	56.2036	97.9286	106.086	253.544
KAT2B	chr3_20140343_20140362_+	0	106.95	5.23516	29.3186	0	5.91616	36.9633	40.6995	105.072
BUB1	chr2_110667592_110667611_-	3.66433	42.7802	57.5867	23.9879	58.276	212.982	98.8887	133.441	20.5576
TDO2	chr4_155918222_155918241_+	119.091	1.18834	345.52	233.216	295.964	73.9521	173.775	205.499	107.356
TOP2B	chr3_25623661_25623680_-	218.028	4.75335	151.82	569.713	824.376	239.605	230.42	439.021	294.659
SSTR4	chr20_23035842_23035861_-	858.37	364.82	193.701	313.176	559.188	248.479	376.833	262.879	507.087
JAK3	chr19_17840229_17840248_+	44.8881	158.049	214.641	33.9829	6.54787	278.06	339.39	208.168	27.4101
AR	chrX_67545523_67545542_-	357.272	577.533	246.052	410.46	335.251	269.185	206.898	160.129	306.08
GNRH1	chr8_25423304_25423323_-	226.272	0	0	83.2914	6.54787	82.8263	61.9255	78.7303	324.353
BCL2L2	chr14_23308051_23308070_-	502.013	241.233	209.406	15.992	159.768	68.0359	65.7658	226.85	111.925
NDUFA4L2	chr12_57237031_57237050_-	1.83217	11.8834	141.349	302.514	71.3717	260.311	157.934	77.3959	22.8418
ADGRG3	chr16_57673320_57673339_+	3.66433	219.843	20.9406	113.276	223.282	210.024	313.468	164.8	153.04
KCNF1	chr2_10912696_10912715_+	234.517	26.1434	20.9406	6.66331	0	156.778	138.732	76.7286	15.9892
PLA2G7	chr6_46705270_46705289_+	2.74825	48.7219	88.9977	157.921	287.451	17.7485	136.332	94.076	155.324
SSTR2	chr17_73169578_73169597_-	6.41258	0	83.7625	181.242	7.20265	141.988	162.254	113.425	159.892
SRPK1	chr6_35890995_35891014_-	1.83217	0	5.23516	0	39.2872	159.736	60.4853	54.7109	121.061
RPS6KA3	chrX_20176306_20176325_+	16.4895	2.37668	20.9406	11.3276	13.0957	103.533	144.973	97.412	157.608
ERAP1	chr5_96803530_96803549_+	115.426	174.686	78.5274	227.219	51.0734	127.198	144.973	130.105	228.418
RPTOR	chr17_80707900_80707919_+	92.5244	669.035	214.641	148.592	436.743	85.7844	109.45	122.099	79.9462
TNFRSF4	chr1_1212076_1212095_-	155.734	102.197	622.984	334.498	526.448	239.605	358.592	400.323	107.356
PDK4	chr7_95595051_95595070_+	65.958	42.7802	115.173	103.281	285.487	254.395	257.303	188.152	317.5
CYP2C9	chr10_94988963_94988982_-	133.748	244.798	41.8813	68.6321	0	62.1197	111.85	80.7319	472.824
ADORA1	chr1_203129161_203129180_-	180.468	550.201	235.582	61.3025	170.899	79.8682	89.2879	133.441	198.723
RPS6KA6	chrX_84119930_84119949_-	1.83217	120.022	5.23516	111.277	51.0734	32.5389	131.532	90.74	0
SLC22A11	chr11_64556085_64556104_-	191.461	229.349	68.0571	116.608	43.8707	59.1616	193.937	204.165	25.1259
FGB	chr4_154566563_154566582_+	65.0419	193.699	83.7625	153.923	23.5723	198.192	96.0085	126.102	15.9892
RORB	chr9_74642445_74642464_+	956.39	34.4618	188.466	247.209	209.532	455.545	269.304	234.856	360.9
ATP1A2	chr1_160139705_160139724_-	0.916083	35.6502	57.5867	49.3085	108.695	292.85	177.616	242.863	54.8202
GPR55	chr2_230910713_230910732_+	545.985	318.475	225.112	209.894	65.4787	366.802	288.025	214.84	237.554
ROSA26	chr3_9365195_9365214_-	386.587	301.838	5.23516	77.9608	366.681	76.9101	195.857	167.469	164.461
SLC6A19	chr5_1210467_1210486_-	1.83217	98.6321	41.8813	25.3206	314.298	136.072	203.538	36.6963	36.5468
KDM5C	chrX_53218305_53218324_-	299.559	127.152	151.82	125.27	39.942	201.15	123.851	268.884	303.795
KCNJ12	chr17_21415563_21415582_+	468.118	268.565	125.644	58.6372	89.051	251.437	154.574	97.412	134.766
FOLR1	chr11_72195263_72195282_+	532.244	224.596	287.934	421.121	532.996	283.976	288.986	150.788	543.634
SSTR1	chr14_38209906_38209925_+	235.433	1.18834	115.173	64.6341	0	14.7904	89.7679	144.116	155.324
PIK3C2A	chr11_17117635_17117654_+	3.66433	13.0717	167.525	7.99598	87.7414	65.0778	65.2858	119.43	397.447
NFKB2	chr10_102397970_102397989_+	10.993	415.919	277.463	49.9749	343.108	62.1197	26.8824	136.777	294.659
HDAC7	chr12_47795338_47795357_+	133.748	168.744	167.525	61.3025	108.695	79.8682	67.2059	64.0517	388.31
NUCB1	chr19_48921162_48921181_+	564.307	913.832	225.112	135.265	159.113	499.916	182.896	340.942	194.155
CASP14	chr19_15055265_15055284_-	492.853	238.856	94.2328	141.929	53.0377	56.2036	25.9223	142.115	2.28418
ADRB1	chr10_114045030_114045049_-	433.307	380.268	429.283	274.529	377.157	343.138	271.224	290.234	226.133
GRIN3A	chr9_101670293_101670312_-	112.678	3.56502	230.347	191.903	240.961	186.359	267.864	236.858	187.302
WNK3	chrX_54333245_54333264_-	4.58041	114.081	109.938	97.9507	227.866	156.778	41.7637	248.2	63.9569
CDKL1	chr14_50359065_50359084_+	0	66.547	204.171	50.6412	65.4787	38.4551	66.7259	68.055	61.6728
HDAC8	chrX_72567993_72568012_+	67.7901	0	73.2922	132.6	0	94.6586	23.5221	92.0744	29.6943
PDE7B	chr6_136147346_136147365_+	0.916083	0	5.23516	15.992	113.278	32.5389	50.8845	21.3506	0
PTGFR	chr1_78493270_78493289_+	259.251	111.704	151.82	259.869	82.5031	204.108	179.056	69.3894	303.795
BRAF	chr7_140834617_140834636_-	110.846	149.731	47.1164	194.569	483.233	59.1616	53.7647	61.3829	164.461
PLAU	chr10_73913725_73913744_-	4.58041	57.0403	235.582	95.2854	56.3117	26.6227	61.9255	117.428	57.1044
SLCO1A2	chr12_21300522_21300541_-	480.943	799.752	94.2328	254.539	211.496	281.018	252.502	192.822	356.331
ADCY5	chr3_123291328_123291347_-	190.545	665.47	235.582	11.3276	48.4542	103.533	39.8435	82.0663	89.0829
CD74	chr5_150406284_150406303_-	237.265	13.0717	68.0571	129.935	75.3005	100.575	16.8015	139.446	75.3778
LY96	chr8_73991467_73991486_-	1.83217	0	141.349	0.666331	0	177.485	94.5683	118.095	155.324
PDPK1	chr16_2597167_2597186_-	58.6293	66.547	52.3516	0	0	141.988	96.4885	33.3603	54.8202
CD40	chr20_46122338_46122357_-	0.916083	79.6187	146.584	51.9738	0.654787	159.736	85.4475	112.758	260.396
CD38	chr4_15778601_15778620_-	456.209	369.573	219.877	325.836	151.911	354.97	381.634	188.819	255.828
PTGER4	chr5_40691854_40691873_-	243.678	53.4752	266.993	137.931	396.146	156.778	130.091	48.706	27.4101
KIT	chr4_54723618_54723637_+	359.104	250.739	455.459	240.546	1039.8	180.443	211.699	282.895	226.133
CYP51A1	chr7_92131844_92131863_+	0	178.251	47.1164	19.9899	27.501	35.497	49.9244	24.6866	13.7051
CACNA2D4	chr12_1795702_1795721_+	225.356	800.94	287.934	180.576	265.189	230.73	195.377	121.431	315.216
C7	chr5_40936435_40936454_-	1.83217	140.224	115.173	110.611	58.276	221.856	160.334	108.755	100.504
ADAM8	chr10_133273796_133273815_+	213.447	352.937	120.409	130.601	331.322	248.479	214.099	396.987	15.9892
HRAS	chr11_533529_533548_-	144.741	579.909	256.523	666.998	1004.44	476.251	460.841	88.7383	258.112
HDAC4	chr2_239102813_239102832_+	465.37	0	366.461	192.57	26.1915	53.2455	58.5652	120.097	11.4209
TUBA3D	chr2_131479375_131479394_+	201.538	27.3318	130.879	101.949	257.331	186.359	107.049	71.391	77.662
SLC22A1	chr6_160130091_160130110_+	371.014	439.685	104.703	119.273	451.148	198.192	359.552	84.7351	134.766
MAP3K8	chr10_30447880_30447899_-	4.58041	474.147	78.5274	57.9708	204.293	210.024	228.5	171.472	130.198
HDAC9	chr7_18727594_18727613_-	512.09	381.457	408.342	475.761	243.581	387.509	420.037	421.007	758.346
AAVS1	chr19_55157557_55157576_-	443.384	263.811	570.632	85.2904	510.734	177.485	228.5	102.082	415.72
MAP3K12	chr12_53482903_53482922_+	448.881	335.111	523.516	77.9608	0	215.94	198.257	135.443	89.0829
KCNG3	chr2_42492990_42493009_+	603.699	38.0268	424.048	100.616	218.699	263.269	261.623	223.514	232.986
PTGFR	chr1_78492954_78492973_-	340.783	237.668	282.699	331.167	407.277	529.497	529.967	202.163	187.302
BIRC5	chr17_78214352_78214371_-	1.83217	0	47.1164	0	0	14.7904	153.134	57.3797	0
LTB4R	chr14_24315926_24315945_-	1420.84	93.8788	345.52	118.607	0	26.6227	170.895	224.181	29.6943
BPTF	chr17_67912831_67912850_+	98.0209	160.426	350.756	141.262	1.96436	91.7006	106.089	75.3942	82.2303
POLR2L	chr11_842479_842498_-	17.4056	601.299	219.877	84.6241	0	38.4551	101.769	8.00647	91.367
NDUFS2	chr1_161206488_161206507_-	862.95	493.161	162.29	388.471	356.204	505.832	376.833	312.919	370.037
ITPKA	chr15_41494390_41494409_+	185.965	535.941	429.283	144.594	267.153	387.509	331.709	398.322	43.3993
KDR	chr4_55101917_55101936_-	279.405	389.775	157.055	135.932	31.4298	239.605	136.812	101.415	57.1044
ACVR2B	chr3_38479697_38479716_+	230.853	597.734	209.406	297.85	325.429	3215.44	180.976	254.205	555.055
CACNA1D	chr3_53772852_53772871_-	508.426	2.37668	282.699	694.984	883.962	139.03	151.693	109.422	109.64
ACVR1B	chr12_51981037_51981056_+	109.93	295.896	52.3516	103.948	99.5276	88.7425	26.4023	46.0372	77.662
MAPKAPK3	chr3_50617686_50617705_-	134.664	7.13003	308.874	118.607	80.5388	192.275	120.971	280.894	166.745
VEGFC	chr4_176729681_176729700_+	27.4825	306.591	109.938	57.9708	572.938	221.856	138.252	285.564	166.745
ACACA	chr17_37240555_37240574_-	127.335	229.349	319.345	148.592	62.8595	50.2874	180.496	90.74	107.356
ERAP1	chr5_96795104_96795123_-	277.573	150.919	219.877	85.9567	248.164	144.946	223.7	123.433	383.742
KCNJ11	chr11_17387485_17387504_+	313.3	7.13003	57.5867	23.9879	22.9175	106.491	116.17	165.467	52.536
ABAT	chr16_8774908_8774927_+	444.3	180.627	282.699	157.254	137.505	195.233	256.343	182.147	79.9462
MBTPS1	chr16_84070679_84070698_+	136.496	654.775	177.995	88.6221	238.997	189.317	120.971	194.824	322.069
CD40LG	chrX_136656375_136656394_+	237.265	665.47	41.8813	122.605	11.7862	245.521	221.78	90.74	196.439
ROSA26	chr3_9381398_9381417_-	31.1468	129.529	382.167	249.874	357.514	248.479	270.744	146.785	105.072
MAST3	chr19_18135738_18135757_+	196.042	216.278	204.171	299.183	297.928	363.844	565.01	312.252	178.166
CELA1	chr12_51345781_51345800_+	186.881	0	115.173	239.879	81.1935	32.5389	34.083	50.7076	91.367
KCNK13	chr14_90062524_90062543_-	464.454	0	62.8219	130.601	121.79	47.3293	94.0883	76.0614	102.788
CYP1B1	chr2_38075005_38075024_+	390.251	531.187	355.991	274.529	338.525	215.94	348.511	202.163	89.0829
SLC36A1	chr5_151467736_151467755_+	281.237	192.511	99.468	77.9608	179.412	35.497	109.45	59.3813	15.9892
NPY1R	chr4_163326251_163326270_+	0	0	73.2922	57.3045	0	62.1197	27.8425	76.0614	125.63
ADAM9	chr8_39023277_39023296_+	0	0	120.409	57.9708	73.9909	20.7066	33.603	12.0097	75.3778
DIO1	chr1_53906255_53906274_+	349.944	0	41.8813	115.275	128.993	17.7485	48.0042	148.12	27.4101
TUBB3	chr16_89933517_89933536_+	415.902	134.282	455.459	407.795	157.149	298.766	254.902	144.116	150.756
CHRNB4	chr15_78635440_78635459_-	709.964	196.076	209.406	382.474	747.766	570.91	622.615	494.399	315.216
CXCR3	chrX_71616985_71617004_-	281.237	425.425	146.584	698.982	382.395	346.096	315.388	121.431	139.335
CACNG1	chr17_67044818_67044837_-	157.566	108.139	68.0571	79.2934	125.719	97.6167	156.974	117.428	139.335
PIK3R6	chr17_8828860_8828879_-	801.572	282.825	256.523	165.917	610.916	130.156	179.056	78.0631	125.63
CACNA1F	chrX_49215234_49215253_-	195.126	243.609	230.347	210.561	375.848	88.7425	108.49	173.473	47.9677
TUBA1A	chr12_49185502_49185521_+	654.083	614.371	272.228	19.3236	0	85.7844	126.251	42.034	43.3993
MPI	chr15_74897198_74897217_+	87.9439	215.089	31.4109	73.2965	10.4766	192.275	171.855	64.7189	315.216
CA2	chr8_85475795_85475814_+	138.328	380.268	5.23516	199.899	708.479	165.653	157.454	54.7109	52.536
WNK3	chrX_54309199_54309218_+	102.601	105.762	83.7625	157.254	101.492	62.1197	156.974	163.465	13.7051
ICE1	chr5_5462621_5462640_+	13.7412	245.986	73.2922	106.613	121.79	218.898	153.614	206.167	166.745
P2RY4	chrX_70259488_70259507_+	839.132	2.37668	397.872	209.228	259.95	212.982	189.137	168.136	386.026
FGF1	chr5_142614083_142614102_+	259.251	215.089	36.6461	247.875	177.447	204.108	743.586	260.877	383.742
HMGCS1	chr5_43297044_43297063_+	76.9509	1.18834	120.409	0	0.654787	44.3712	3.84034	6.00485	191.871
STS	chrX_7325387_7325406_-	705.384	263.811	204.171	141.929	381.086	304.682	263.063	176.809	173.597
DYRK4	chr12_4612552_4612571_-	219.86	490.784	151.82	211.893	66.1335	443.712	270.744	249.535	210.144
NOD2	chr16_50711023_50711042_-	85.1957	569.214	209.406	523.736	176.792	494	397.475	270.885	436.278
SLC6A4	chr17_30217167_30217186_-	548.734	370.762	167.525	261.202	502.221	233.689	316.348	317.59	171.313
ADAM12	chr10_126109776_126109795_-	248.258	386.21	324.58	333.832	612.226	665.569	396.035	248.2	139.335
RRM1	chr11_4127063_4127082_-	213.447	74.8653	266.993	17.3246	0.654787	136.072	139.692	505.075	75.3778
MAPKAPK2	chr1_206685469_206685488_+	75.1188	57.0403	167.525	55.3055	26.8463	85.7844	25.4422	123.433	102.788
DHFR	chr5_80654439_80654458_-	131	437.309	225.112	3.33166	127.683	5.91616	0	35.3619	0
GAA	chr17_80105757_80105776_+	170.391	249.551	340.285	344.493	513.353	236.647	312.028	238.192	609.875
NTRK1	chr1_156873687_156873706_-	462.622	755.783	418.813	83.9578	0	88.7425	113.77	184.149	102.788
GIF	chr11_59837173_59837192_+	56.7971	3.56502	198.936	114.609	132.922	269.185	71.5263	197.493	292.375
CA7	chr16_66850574_66850593_-	21.986	250.739	109.938	102.615	130.303	26.6227	27.3624	94.7432	29.6943
RPS6KA1	chr1_26572240_26572259_+	10.993	47.5335	15.7055	63.9678	41.2516	47.3293	36.4832	48.706	20.5576
GHSR	chr3_172448246_172448265_+	968.299	313.721	664.865	694.984	930.452	686.275	610.614	935.422	797.177
TSSK1B	chr5_113434525_113434544_-	78.7831	1.18834	47.1164	243.211	1.30957	88.7425	104.649	32.0259	125.63
BMX	chrX_15536377_15536396_-	697.139	178.251	366.461	359.153	386.324	204.108	214.099	252.204	481.961
AAVS1	chr19_55161299_55161318_+	124.587	92.6904	706.746	189.238	466.863	269.185	188.657	262.879	952.501
CACNA1D	chr3_53749287_53749306_+	1.83217	211.524	172.76	187.239	1.30957	32.5389	99.8488	324.262	63.9569
GRIN3A	chr9_101686891_101686910_-	36.6433	67.7353	99.468	903.545	1466.07	236.647	250.582	136.11	29.6943
PHKG2	chr16_30751126_30751145_-	407.657	699.931	109.938	225.22	94.9441	301.724	150.253	150.121	121.061
FGFR4	chr5_177092482_177092501_-	1.83217	2.37668	83.7625	129.268	168.935	100.575	141.612	64.0517	68.5253
NT5E	chr6_85492068_85492087_+	83.3635	24.9551	256.523	47.9759	0.654787	322.431	200.658	17.3473	43.3993
GHRHR	chr7_30971997_30972016_-	8.24474	47.5335	219.877	172.58	43.8707	118.323	130.572	157.461	125.63
CLU	chr8_27605286_27605305_+	0	0	78.5274	120.606	8.51223	26.6227	9.60085	236.858	22.8418
CACNA1I	chr22_39665966_39665985_-	87.9439	140.224	15.7055	129.268	251.438	109.449	136.332	145.451	109.64
HCRTR2	chr6_55255298_55255317_-	108.098	212.713	455.459	131.267	204.293	251.437	190.577	260.877	187.302
CYP3A43	chr7_99839151_99839170_+	101.685	8.31837	36.6461	71.2975	41.2516	70.994	93.1282	79.3975	61.6728
BMX	chrX_15531348_15531367_+	46.7202	0	355.991	107.279	94.2893	121.281	118.09	70.7238	82.2303
TNIK	chr3_171093929_171093948_-	270.244	55.8519	298.404	209.228	0	156.778	64.8057	106.753	159.892
HSP90AB1	chr6_44250011_44250030_+	8.24474	245.986	31.4109	127.936	345.727	133.114	112.33	100.081	75.3778
PDE7A	chr8_65779757_65779776_-	163.063	0	36.6461	89.2884	39.942	26.6227	27.3624	17.3473	86.7987
PSMB5	chr14_23033423_23033442_+	79.6992	465.829	136.114	2.66533	0.654787	62.1197	92.1681	136.777	415.72
HTR1F	chr3_87991293_87991312_-	0.916083	0	0	77.9608	132.267	91.7006	77.7669	338.94	308.364
PDE9A	chr21_42759033_42759052_-	556.062	240.044	251.288	130.601	572.284	245.521	258.743	330.934	438.562
ATP4A	chr19_35555741_35555760_-	88.86	32.0851	146.584	81.2924	267.808	124.239	170.415	51.3748	45.6835
NOTCH4	chr6_GL000256v2_alt_3537474_3537493_+	435.139	38.0268	167.525	16.6583	24.2271	82.8263	90.728	72.7254	22.8418
P2RY12	chr3_151338525_151338544_+	10.993	0	0	0	49.7638	68.0359	131.532	40.6995	6.85253
AXL	chr19_41248563_41248582_+	360.937	496.726	481.635	327.835	682.288	204.108	113.77	250.202	376.889
CARM1	chr19_10916447_10916466_-	192.377	139.036	329.815	272.53	153.22	115.365	234.741	218.176	189.587
SPC24	chr19_11155706_11155725_-	687.062	310.156	125.644	0	0	41.4132	17.7616	146.785	38.831
POLR3K	chr16_53481_53500_+	269.328	268.565	408.342	11.994	0.654787	41.4132	13.4412	10.0081	0
OXER1	chr2_42763720_42763739_+	39.3916	143.789	115.173	716.973	678.359	139.03	236.181	104.751	22.8418
PSMB4	chr1_151401294_151401313_-	177.72	400.47	157.055	83.2914	130.303	144.946	23.5221	65.3862	292.375
CTSA	chr20_45893247_45893266_-	218.028	51.0986	120.409	48.6422	157.804	150.862	153.614	74.727	191.871
TEK	chr9_27197357_27197376_+	119.091	248.363	256.523	263.201	298.583	44.3712	229.46	294.905	433.993
KCNH5	chr14_62987103_62987122_-	0.916083	0	73.2922	127.269	225.247	47.3293	34.083	38.6979	18.2734
HRAS	chr11_533800_533819_+	153.902	2.37668	104.703	140.596	86.4318	73.9521	139.212	82.7335	38.831
PTGER4	chr5_40681595_40681614_-	145.657	385.022	94.2328	401.798	362.097	144.946	116.17	276.223	111.925
PSMB6	chr17_4796274_4796293_+	264.748	81.9954	188.466	265.2	147.327	340.179	289.946	248.2	244.407
UCHL1	chr4_41261881_41261900_+	412.237	790.245	392.637	675.66	401.384	535.413	427.238	761.949	166.745
PANX1	chr11_94153546_94153565_+	1.83217	78.4303	68.0571	313.842	60.8952	210.024	128.171	175.475	61.6728
ALOX5AP	chr13_30744124_30744143_+	82.4474	29.7085	235.582	115.275	69.4074	8.87425	26.4023	159.462	86.7987
MYLK2	chr20_31821519_31821538_-	502.013	99.8204	335.05	277.194	237.688	147.904	85.9276	260.21	150.756
JAK1	chr1_64845586_64845605_+	396.664	125.964	198.936	3.99799	3.27393	242.563	47.0442	78.7303	13.7051
HCN4	chr15_73367894_73367913_-	340.783	736.77	115.173	301.182	240.961	387.509	317.788	230.853	899.965
CD40LG	chrX_136659073_136659092_+	19.2377	3.56502	256.523	187.905	692.764	70.994	154.574	93.4088	173.597
PDE7A	chr8_65727227_65727246_+	10.0769	312.533	0	48.6422	158.458	112.407	24.4822	26.6882	13.7051
CLK2	chr1_155268334_155268353_-	3.66433	99.8204	99.468	198.567	18.9888	23.6647	124.331	58.0469	91.367
GJD4	chr10_35607914_35607933_-	26.5664	124.776	209.406	700.981	318.226	390.467	199.698	308.916	260.396
KCNK9	chr8_139702823_139702842_-	46.7202	241.233	52.3516	85.9567	232.449	201.15	70.5662	126.102	57.1044
AAVS1	chr19_55173844_55173863_+	2.74825	61.7936	36.6461	37.3146	1.96436	192.275	109.93	12.6769	0
MMP14	chr14_22842497_22842516_-	113.594	349.372	204.171	72.6301	49.7638	124.239	120.011	51.3748	77.662
ITGA5	chr12_54408169_54408188_-	879.439	263.811	5.23516	205.23	357.514	482.167	265.943	43.3684	173.597
SCTR	chr2_119465815_119465834_+	26.5664	546.636	471.164	54.6392	25.5367	79.8682	67.2059	168.136	29.6943
TPH1	chr11_18033298_18033317_+	420.482	419.484	219.877	69.2985	99.5276	20.7066	91.6881	145.451	84.5145
KDM4E	chr11_95026328_95026347_-	194.21	396.905	41.8813	53.3065	153.875	139.03	123.371	31.3587	143.903
CCR5	chr3_46375206_46375225_+	2.74825	238.856	62.8219	133.266	163.697	73.9521	111.37	130.772	283.238
ROSA26	chr3_9363277_9363296_-	583.545	272.13	120.409	309.844	126.374	50.2874	177.616	151.456	349.479
MMP26	chr11_4988250_4988269_-	59.5454	104.574	188.466	3.33166	50.4186	115.365	221.3	51.3748	54.8202
CHRM5	chr15_34063681_34063700_+	334.37	1.18834	183.231	141.262	83.1579	133.114	126.251	246.199	38.831
WDR5	chr9_134154531_134154550_-	426.895	147.354	188.466	131.934	231.14	50.2874	108.01	87.4039	164.461
CD28	chr2_203706731_203706750_-	26.5664	20.2018	136.114	292.519	0	32.5389	54.7248	144.784	15.9892
DYRK1A	chr21_37490256_37490275_+	103.517	588.228	15.7055	102.615	1.30957	109.449	63.3656	94.7432	431.709
ROSA26	chr3_9383209_9383228_-	621.104	942.353	303.639	80.6261	417.754	434.838	378.753	232.855	351.763
ROSA26	chr3_9378886_9378905_+	251.007	20.2018	5.23516	40.6462	86.4318	11.8323	27.3624	10.6753	9.1367
CDK11B	chr1_1636915_1636934_+	214.363	487.219	376.931	147.926	77.2648	192.275	292.346	196.158	130.198
ARAF	chrX_47563220_47563239_+	302.307	190.134	507.81	299.849	373.228	496.958	275.544	237.525	251.259
PRKCG	chr19_53884191_53884210_-	276.657	728.452	450.224	485.756	282.868	476.251	310.107	486.393	433.993
JAK3	chr19_17842447_17842466_-	59.5454	456.322	120.409	53.9728	77.2648	94.6586	48.9643	215.507	54.8202
TPX2	chr20_31783790_31783809_-	0.916083	184.192	256.523	395.801	146.017	381.593	291.386	80.0647	196.439
SLC22A1	chr6_160122193_160122212_+	379.258	709.438	214.641	151.924	334.596	278.06	184.816	123.433	169.029
AAVS1	chr19_55241337_55241356_-	921.579	702.308	455.459	703.646	551.33	934.754	852.075	605.823	587.033
PARP2	chr14_20356003_20356022_-	0	0	47.1164	117.274	27.501	44.3712	46.0841	70.7238	11.4209
GRM7	chr3_7578879_7578898_-	260.167	28.5201	10.4703	51.9738	0	91.7006	120.011	20.6834	185.018
FES	chr15_90889534_90889553_-	392.999	91.5021	188.466	277.86	570.319	446.67	492.523	221.512	242.123
CSF2RB	chr22_36929711_36929730_-	775.922	727.263	471.164	895.549	528.413	730.646	534.287	850.687	970.775
GIF	chr11_59844013_59844032_+	1.83217	29.7085	41.8813	253.206	335.251	109.449	101.769	57.3797	73.0936
GJD2	chr15_34753201_34753220_+	441.552	14.2601	162.29	164.584	118.516	88.7425	219.859	222.847	251.259
CNTN1	chr12_40922373_40922392_+	0	0	47.1164	23.9879	0	17.7485	31.2028	10.0081	2.28418
ICE1	chr5_5465172_5465191_+	0	0	31.4109	0	0	38.4551	35.5231	53.3765	0
CHRNB4	chr15_78631125_78631144_-	164.895	244.798	204.171	105.28	337.215	189.317	101.769	394.986	221.565
SLC28A2	chr15_45263063_45263082_-	282.153	95.0671	408.342	553.055	252.093	269.185	371.553	209.503	475.109
NDUFB3	chr2_201085534_201085553_+	454.377	1.18834	36.6461	265.2	163.697	198.192	417.157	222.847	342.626
KIT	chr4_54727249_54727268_-	1.83217	224.596	0	150.591	254.712	88.7425	144.493	68.055	132.482
ADRB2	chr5_148827801_148827820_-	0.916083	0	204.171	102.615	373.883	165.653	89.2879	107.42	157.608
CCR5	chr3_46375545_46375564_+	253.755	4.75335	73.2922	357.82	782.47	65.0778	54.2448	252.871	86.7987
GABRR1	chr6_89198105_89198124_+	61.3775	230.538	20.9406	1.33266	49.109	79.8682	39.3635	32.0259	91.367
CUL4A	chr13_113233254_113233273_-	14.6573	494.349	240.817	492.419	596.511	272.144	420.037	366.963	356.331
MAP4K5	chr14_50486103_50486122_+	246.426	58.2286	15.7055	83.9578	0	82.8263	85.4475	56.7125	150.756
FARSA	chr19_12930469_12930488_-	98.0209	559.707	73.2922	207.229	232.449	91.7006	70.5662	356.955	50.2519
CACNA1C	chr12_2581781_2581800_-	8.24474	324.416	628.219	126.603	358.168	94.6586	300.507	396.32	388.31
ESRRG	chr1_216568041_216568060_-	9.16083	285.201	47.1164	311.177	261.26	230.73	351.871	168.803	292.375
SLC32A1	chr20_38725031_38725050_+	130.084	221.031	314.109	193.236	322.155	147.904	218.899	324.929	162.177
ERBB4	chr2_212124861_212124880_-	78.7831	303.026	31.4109	143.928	74.6457	56.2036	96.4885	164.133	207.86
ITPR1	chr3_4775314_4775333_+	587.209	86.7487	125.644	82.6251	102.147	245.521	163.214	361.625	214.713
CASP6	chr4_109690921_109690940_-	352.692	112.892	88.9977	165.917	303.166	236.647	216.979	145.451	111.925
C5	chr9_121014000_121014019_+	0	57.0403	0	0	1.30957	41.4132	15.3614	6.00485	41.1152
UBA3	chr3_69061815_69061834_-	407.657	0	240.817	115.942	1.96436	212.982	275.544	33.3603	84.5145
CCKBR	chr11_6260051_6260070_-	1080.98	206.771	120.409	159.92	58.9308	218.898	141.132	230.186	143.903
ANPEP	chr15_89806373_89806392_-	363.685	375.515	214.641	282.525	610.916	266.227	392.675	333.603	116.493
RPS8	chr1_44776718_44776737_+	4.58041	330.358	314.109	76.6281	0	174.527	222.74	78.7303	13.7051
FNTA	chr8_43077248_43077267_+	199.706	166.367	136.114	52.6402	66.1335	91.7006	78.2469	134.776	130.198
NOS2	chr17_27762799_27762818_-	581.713	677.353	256.523	611.026	394.182	236.647	301.467	229.519	262.68
MAP3K19	chr2_134986795_134986814_+	0.916083	1.18834	151.82	117.274	265.843	144.946	86.4076	222.179	18.2734
ROSA26	chr3_9373491_9373510_+	2.74825	452.757	26.1758	25.3206	48.4542	180.443	147.853	81.3991	41.1152
ROSA26	chr3_9384550_9384569_+	622.02	150.919	376.931	367.815	244.235	201.15	268.344	203.498	255.828
PRSS1	chr7_142751976_142751995_-	163.063	194.888	115.173	513.741	134.886	491.042	345.15	115.427	134.766
IMPDH2	chr3_49027743_49027762_+	75.1188	230.538	41.8813	103.948	76.61	56.2036	42.2437	75.3942	41.1152
KPNB1	chr17_47669712_47669731_-	211.615	336.3	47.1164	94.6191	39.2872	29.5808	0.960085	0	15.9892
KCNS1	chr20_45097650_45097669_+	338.035	35.6502	214.641	594.368	603.059	215.94	250.582	396.32	344.911
CDK17	chr12_96289175_96289194_+	131	286.39	20.9406	288.521	908.189	139.03	246.742	204.832	577.897
TEC	chr4_48156670_48156689_+	294.979	0	115.173	31.9839	248.819	65.0778	76.3267	83.4007	45.6835
RPL18	chr19_48616727_48616746_-	392.083	272.13	282.699	80.6261	15.7149	106.491	59.5253	102.082	54.8202
CDKN3	chr14_54411604_54411623_+	324.293	186.569	324.58	183.241	0.654787	174.527	172.815	254.205	105.072
RAF1	chr3_12591768_12591787_-	0.916083	4.75335	0	41.3125	22.9175	29.5808	117.61	88.7383	0
RPTOR	chr17_80625732_80625751_+	177.72	16.6367	146.584	296.517	109.349	106.491	113.29	150.121	134.766
VDR	chr12_47855721_47855740_+	273.909	149.731	41.8813	148.592	153.22	136.072	274.104	36.6963	82.2303
GJD4	chr10_35607700_35607719_-	9.16083	106.95	151.82	387.805	976.942	162.695	123.851	158.795	358.616
CDK12	chr17_39462331_39462350_+	196.958	2.37668	167.525	5.99698	104.111	29.5808	38.8834	106.086	102.788
CYP51A1	chr7_92123219_92123238_-	0.916083	0	172.76	153.256	85.7771	56.2036	53.7647	37.3635	139.335
CNTN1	chr12_40943999_40944018_-	97.1048	228.161	193.701	175.245	121.79	165.653	87.8478	207.501	47.9677
EPHB2	chr1_22785055_22785074_+	697.139	27.3318	251.288	253.206	591.927	310.599	535.727	401.658	280.954
NDUFS5	chr1_39028856_39028875_+	331.622	3.56502	88.9977	117.274	90.3606	0	27.8425	112.091	31.9785
MAP3K2	chr2_127326757_127326776_-	0	1.18834	94.2328	28.6522	0	147.904	2.40021	54.0437	100.504
ALOX15	chr17_4637187_4637206_+	41.2237	206.771	230.347	142.595	155.184	227.772	224.18	38.6979	36.5468
SLC29A4	chr7_5299333_5299352_-	9.16083	114.081	198.936	249.208	159.768	174.527	146.413	312.252	461.404
CYP2A6	chr19_40850376_40850395_+	10.0769	399.282	198.936	358.486	551.985	207.066	269.784	181.48	185.018
SLC23A1	chr5_139378647_139378666_-	745.691	181.816	675.335	161.919	168.935	144.946	175.696	451.031	255.828
KCNJ10	chr1_160041931_160041950_+	4.58041	146.166	0	218.557	0	82.8263	99.3688	56.7125	134.766
CHRM1	chr11_62910747_62910766_+	174.972	101.009	235.582	139.93	337.215	115.365	58.5652	168.136	102.788
NGF	chr1_115286669_115286688_+	109.93	368.385	73.2922	322.504	201.674	375.676	283.705	242.196	239.838
LPAR4	chrX_78755306_78755325_+	78.7831	5.94169	209.406	75.9618	0.654787	156.778	175.215	75.3942	276.385
PKN2	chr1_88760259_88760278_-	1057.16	115.269	214.641	214.559	131.612	292.85	340.83	84.0679	132.482
RXRA	chr9_134408948_134408967_+	313.3	149.731	104.703	107.279	200.365	65.0778	12.4811	60.7157	139.335
PPARA	chr22_46235158_46235177_+	0.916083	0	88.9977	214.559	75.3005	32.5389	89.7679	144.784	15.9892
KCNK18	chr10_117201211_117201230_-	293.146	998.204	403.107	246.543	994.621	446.67	209.298	313.587	162.177
AOAH	chr7_36621718_36621737_-	686.146	74.8653	497.34	166.583	99.5276	118.323	82.0872	123.433	121.061
PLAU	chr10_73916437_73916456_+	289.482	200.829	246.052	43.9779	225.901	218.898	250.102	135.443	203.292
CSNK1E	chr22_38299918_38299937_-	8.24474	251.928	272.228	495.751	1019.5	425.964	281.785	362.293	303.795
SELL	chr1_169707371_169707390_-	160.314	265	554.927	461.101	828.305	532.455	152.173	407.663	141.619
ATP2A2	chr12_110340700_110340719_-	184.133	320.851	193.701	25.3206	90.3606	201.15	46.0841	152.123	287.806
KMO	chr1_241562260_241562279_-	343.531	614.371	62.8219	173.246	608.952	112.407	282.265	242.863	150.756
SPTLC3	chr20_13074454_13074473_+	242.762	78.4303	41.8813	238.547	162.387	372.718	240.501	215.507	230.702
FBL	chr19_39839038_39839057_+	206.119	142.601	177.995	13.993	0.654787	94.6586	62.8855	4.00323	98.2196
CDKN1A	chr6_36684508_36684527_+	458.041	440.874	298.404	159.253	749.076	56.2036	59.5253	140.113	57.1044
SSTR2	chr17_73170097_73170116_-	10.993	40.4035	52.3516	170.581	197.746	103.533	144.493	164.8	118.777
DYRK1A	chr21_37493104_37493123_-	6.41258	122.399	0	89.2884	241.616	23.6647	103.689	48.0388	57.1044
KCNQ2	chr20_63444704_63444723_-	249.175	306.591	256.523	311.843	408.587	485.125	450.76	567.125	134.766
AAVS1	chr19_55250813_55250832_-	100.769	142.601	188.466	135.932	3.27393	150.862	135.852	140.78	52.536
PGR	chr11_101128159_101128178_+	0.916083	112.892	125.644	59.3035	30.775	59.1616	118.09	74.0598	216.997
SLC12A4	chr16_67951846_67951865_-	398.496	105.762	277.463	141.929	33.3941	65.0778	306.747	282.895	285.522
PDE6G	chr17_81653286_81653305_-	458.957	327.981	177.995	309.844	402.694	215.94	493.004	146.118	360.9
NDUFA5	chr7_123557405_123557424_-	39.3916	470.582	366.461	69.2985	0	76.9101	141.132	278.225	38.831
C5	chr9_120991262_120991281_-	1.83217	168.744	83.7625	87.9557	28.8106	73.9521	90.248	206.167	75.3778
PSMA8	chr18_26158223_26158242_+	5.4965	0	68.0571	191.237	130.303	183.401	77.7669	202.163	77.662
ADRA2C	chr4_3766729_3766748_+	185.049	229.349	376.931	218.557	68.7526	162.695	176.656	205.499	285.522
FDPS	chr1_155309863_155309882_+	1.83217	0	68.0571	50.6412	36.0133	103.533	38.4034	93.4088	175.882
GP2	chr16_20326339_20326358_-	770.426	428.99	125.644	465.099	147.327	313.557	560.209	318.924	438.562
PHF8	chrX_54022323_54022342_-	295.895	3.56502	298.404	68.6321	84.4675	91.7006	160.814	263.546	276.385
SELL	chr1_169708591_169708610_-	70.5384	1.18834	47.1164	41.3125	0.654787	168.611	109.45	54.0437	18.2734
GUCY1A2	chr11_106986109_106986128_+	654.999	65.3586	523.516	426.452	390.908	298.766	197.777	637.849	322.069
TGM2	chr20_38146792_38146811_-	879.439	0	303.639	30.6512	11.1314	124.239	167.535	294.238	306.08
ADORA2B	chr17_15974743_15974762_-	196.042	1.18834	57.5867	233.216	227.866	360.886	199.698	136.777	121.061
NUP85	chr17_75209851_75209870_+	0	97.4438	15.7055	35.3156	5.89308	29.5808	72.0064	37.3635	344.911
CALCB	chr11_15077308_15077327_-	627.517	375.515	502.575	373.146	1481.13	461.461	415.717	251.537	287.806
ANGPT1	chr8_107347081_107347100_-	289.482	104.574	36.6461	171.247	227.866	94.6586	130.091	120.097	41.1152
ROSA26	chr3_9366345_9366364_-	177.72	1.18834	361.226	173.246	160.423	198.192	56.645	201.496	91.367
GRM6	chr5_178994692_178994711_+	8.24474	43.9685	324.58	279.193	383.705	461.461	302.427	184.816	283.238
ROSA26	chr3_9376491_9376510_-	28.3986	705.873	544.456	207.895	144.053	272.144	426.758	185.483	205.576
COL4A5	chrX_108695309_108695328_-	1019.6	259.058	403.107	265.866	781.815	212.982	200.658	238.86	292.375
GRIN2D	chr19_48419638_48419657_-	6.41258	194.888	99.468	75.9618	0.654787	97.6167	21.6019	82.7335	11.4209
LTB4R2	chr14_24311271_24311290_+	1096.55	626.254	329.815	580.375	710.444	502.874	859.756	559.118	666.979
VWF	chr12_6021943_6021962_+	4.58041	121.211	109.938	215.225	159.768	50.2874	60.9654	31.3587	118.777
HIPK1	chr1_113954742_113954761_+	76.9509	43.9685	157.055	89.2884	189.888	97.6167	76.8068	216.175	100.504
MSTN	chr2_190062334_190062353_-	757.6	238.856	607.278	292.519	1502.74	434.838	462.281	434.351	386.026
CACNA1I	chr22_39600591_39600610_+	24.7342	582.286	125.644	185.24	356.204	204.108	149.293	186.15	159.892
CPB2	chr13_46067372_46067391_-	377.426	120.022	88.9977	33.9829	47.1446	44.3712	14.4013	57.3797	22.8418
STK32B	chr4_5446709_5446728_-	1428.17	8.31837	261.758	738.962	701.931	112.407	144.973	366.296	201.007
ADRB3	chr8_37966046_37966065_+	198.79	223.408	188.466	92.6201	119.171	239.605	181.936	267.549	73.0936
ACHE	chr7_100893906_100893925_-	10.993	207.959	141.349	159.253	34.0489	68.0359	58.0851	52.7092	59.3886
PLK4	chr4_127891094_127891113_+	160.314	111.704	26.1758	5.99698	0	85.7844	20.6418	16.6801	6.85253
RPL27A	chr11_8684033_8684052_-	642.174	203.206	266.993	41.3125	0.654787	20.7066	37.9233	19.349	79.9462
CAMK2G	chr10_73848575_73848594_+	18.3217	122.399	177.995	44.6442	0	133.114	196.337	103.417	45.6835
POLR3H	chr22_41544019_41544038_-	188.713	118.834	350.756	0	27.501	59.1616	8.64076	6.00485	141.619
TAOK1	chr17_29517620_29517639_+	64.1258	481.277	5.23516	63.3015	78.5744	141.988	144.973	38.6979	36.5468
CYP2J2	chr1_59911733_59911752_+	5.4965	130.717	219.877	211.893	49.7638	165.653	158.894	231.52	84.5145
PDE4C	chr19_18218995_18219014_-	3.66433	211.524	104.703	292.519	281.558	94.6586	83.0473	128.103	116.493
ENPEP	chr4_110477012_110477031_-	189.629	52.2869	88.9977	17.3246	0.654787	26.6227	17.2815	140.78	27.4101
TACR2	chr10_69416042_69416061_+	2.74825	261.434	36.6461	54.6392	135.541	32.5389	36.0032	42.034	25.1259
HPSE	chr4_83308889_83308908_-	83.3635	581.098	141.349	48.6422	12.4409	2.95808	63.3656	87.4039	20.5576
CXCL8	chr4_73741987_73742006_+	190.545	390.963	204.171	245.21	637.762	127.198	265.463	220.845	47.9677
CTSE	chr1_206021098_206021117_+	345.363	4.75335	68.0571	57.3045	45.1803	44.3712	66.2458	108.755	50.2519
ENPEP	chr4_110520269_110520288_+	8.24474	438.497	68.0571	395.801	462.279	168.611	185.296	94.7432	91.367
PAH	chr12_102846921_102846940_+	0	330.358	308.874	29.9849	177.447	186.359	271.224	86.0695	230.702
ENTPD1	chr10_95845480_95845499_-	90.6922	16.6367	130.879	144.594	361.442	251.437	346.591	146.118	52.536
MTNR1B	chr11_92981855_92981874_-	9.16083	7.13003	136.114	77.2944	7.85744	65.0778	131.532	129.438	235.27
FBL	chr19_39837789_39837808_+	1.83217	121.211	15.7055	116.608	18.9888	103.533	63.3656	6.67206	77.662
NDUFB3	chr2_201078996_201079015_+	111.762	90.3137	204.171	61.9688	0.654787	257.353	141.132	48.706	123.346
TAOK1	chr17_29482222_29482241_+	0	57.0403	15.7055	71.2975	262.569	186.359	87.8478	0	61.6728
S1PR2	chr19_10224758_10224777_+	298.643	625.066	251.288	133.933	43.2159	112.407	228.02	273.554	374.605
CDKL2	chr4_75607229_75607248_-	529.496	48.7219	193.701	324.503	163.042	41.4132	41.2836	127.436	212.428
ADAMTS4	chr1_161195477_161195496_+	15.5734	135.471	94.2328	33.9829	242.271	29.5808	36.4832	25.3538	2.28418
ITPR1	chr3_4691235_4691254_+	109.014	137.847	340.285	170.581	26.8463	174.527	234.741	82.7335	93.6512
CCR5	chr3_46373179_46373198_-	104.433	1.18834	73.2922	163.918	271.736	50.2874	72.4864	110.756	201.007
QPCT	chr2_37367312_37367331_-	67.7901	84.372	57.5867	144.594	167.625	35.497	80.6471	85.4023	36.5468
MSTN	chr2_190057387_190057406_-	60.4615	0	361.226	49.3085	241.616	94.6586	70.0862	88.7383	198.723
THRA	chr17_40077579_40077598_+	21.986	117.646	136.114	133.266	349.656	112.407	13.9212	132.107	427.141
CACNA1C	chr12_2595894_2595913_-	230.853	4.75335	52.3516	45.3105	104.766	192.275	156.974	86.0695	134.766
UBA3	chr3_69062143_69062162_-	179.552	2.37668	157.055	0	25.5367	136.072	146.413	36.6963	22.8418
PAK1	chr11_77353537_77353556_-	1.83217	0	83.7625	0.666331	55.0021	35.497	40.8036	39.3651	15.9892
GABRA4	chr4_46977108_46977127_-	311.468	899.572	146.584	351.157	451.148	476.251	376.833	162.131	150.756
METAP1	chr4_98995817_98995836_+	447.964	408.788	287.934	21.9889	0	38.4551	75.3667	16.0129	15.9892
EPHA2	chr1_16138318_16138337_+	338.035	631.008	528.751	198.567	414.48	464.419	342.27	350.95	406.583
VEGFB	chr11_64235988_64236007_+	605.531	634.573	308.874	268.532	223.937	275.102	394.115	755.277	472.824
TRPV3	chr17_3535586_3535605_-	41.2237	238.856	68.0571	97.9507	41.2516	292.85	238.581	102.75	91.367
KDM4A	chr1_43669135_43669154_-	172.224	54.6636	41.8813	67.9658	32.0845	0	65.2858	0	2.28418
MARK3	chr14_103457150_103457169_+	469.034	223.408	57.5867	26.6533	7.85744	189.317	124.331	47.3716	57.1044
GABRA2	chr4_46312497_46312516_-	338.035	478.9	31.4109	366.482	276.32	298.766	372.993	195.491	68.5253
RAN	chr12_130873029_130873048_+	0	2.37668	120.409	15.3256	0	0	30.2427	22.0178	27.4101
MCL1	chr1_150579059_150579078_-	165.811	1.18834	130.879	0	0	5.91616	47.0442	92.7416	70.8095
DNMT3A	chr2_25247115_25247134_+	1.83217	587.039	5.23516	89.2884	440.671	177.485	192.497	243.53	191.871
INHBA	chr7_41690506_41690525_-	189.629	191.323	418.813	105.28	239.652	156.778	148.813	224.848	180.45
MAPKAPK3	chr3_50646812_50646831_-	277.573	1021.97	214.641	501.748	584.724	251.437	197.297	316.923	422.573
NOL9	chr1_6549578_6549597_+	8.24474	0	99.468	29.9849	0	35.497	38.8834	172.139	20.5576
CDC42BPA	chr1_227028987_227029006_+	4.58041	0	177.995	45.3105	76.61	5.91616	98.8887	117.428	13.7051
BACE2	chr21_41168385_41168404_-	39.3916	190.134	282.699	209.894	147.327	212.982	250.582	523.756	468.256
AAVS1	chr19_55185969_55185988_+	537.741	442.062	193.701	695.65	1230.34	195.233	176.176	192.155	107.356
EPHB2	chr1_22784833_22784852_-	486.44	376.703	73.2922	244.544	687.526	144.946	150.733	216.175	347.195
BANF1	chr11_66003318_66003337_-	59.5454	111.704	151.82	291.187	295.309	266.227	259.223	222.847	189.587
GNG7	chr19_2515099_2515118_-	207.035	48.7219	256.523	207.895	330.667	130.156	308.667	210.837	349.479
DKK1	chr10_52314552_52314571_-	10.993	299.461	36.6461	331.167	236.378	230.73	112.81	114.759	465.972
XPNPEP2	chrX_129754511_129754530_+	44.8881	483.654	266.993	151.924	455.077	334.263	192.497	287.566	226.133
ILK	chr11_6604339_6604358_+	131.916	285.201	209.406	106.613	6.54787	201.15	95.5284	133.441	159.892
ISG15	chr1_1014068_1014087_+	25.6503	130.717	15.7055	153.256	271.736	76.9101	127.211	82.7335	93.6512
VIPR1	chr3_42531861_42531880_-	0	0	20.9406	65.3005	159.768	127.198	79.207	48.0388	121.061
RARA	chr17_40349887_40349906_-	172.224	520.492	355.991	15.992	72.6813	275.102	157.934	207.501	27.4101
CNTN1	chr12_40933696_40933715_+	3.66433	161.614	157.055	60.6362	176.792	91.7006	43.6839	48.706	34.2626
ATP1A1	chr1_116401577_116401596_-	88.86	1.18834	120.409	0	0	14.7904	31.6828	29.357	63.9569
CHRNA1	chr2_174759564_174759583_-	4.58041	142.601	36.6461	321.172	390.253	242.563	333.149	191.488	121.061
CCR9	chr3_45900943_45900962_-	431.475	127.152	68.0571	344.493	33.3941	440.754	231.86	228.184	134.766
EPHA4	chr2_221456614_221456633_-	175.888	408.788	314.109	153.923	13.0957	242.563	162.734	275.556	244.407
PAK6	chr15_40272590_40272609_+	251.923	54.6636	183.231	109.278	382.395	44.3712	206.418	180.146	143.903
OXSR1	chr3_38221656_38221675_-	582.629	420.672	319.345	194.569	367.99	283.976	556.849	263.546	422.573
MAPK3	chr16_30117261_30117280_-	170.391	543.071	345.52	396.467	15.7149	502.874	442.119	487.06	326.637
BDKRB1	chr14_96263821_96263840_-	0.916083	19.0134	94.2328	105.28	0	0	33.603	12.6769	169.029
AAVS1	chr19_55136017_55136036_-	12.8252	0	214.641	18.6573	44.5255	281.018	112.33	117.428	105.072
HTR1F	chr3_87991090_87991109_+	0.916083	13.0717	78.5274	16.6583	12.4409	70.994	14.8813	62.0501	127.914
AKT3	chr1_KI270763v1_alt_658041_658060_-	3.66433	0	68.0571	79.9598	134.231	130.156	99.8488	102.75	114.209
PADI1	chr1_17222417_17222436_+	222.608	351.748	62.8219	148.592	273.046	319.473	125.291	56.0453	82.2303
PTPRG	chr3_62203886_62203905_+	189.629	74.8653	167.525	86.6231	12.4409	44.3712	70.0862	85.4023	246.691
BCL2A1	chr15_79961135_79961154_-	114.51	0	109.938	382.474	318.881	35.497	50.8845	111.423	50.2519
BMPR1A	chr10_86923648_86923667_-	8.24474	433.744	340.285	71.2975	0.654787	346.096	494.444	56.7125	525.36
ABL2	chr1_179118725_179118744_+	0	348.183	104.703	1.99899	16.3697	79.8682	116.17	26.6882	84.5145
RBX1	chr22_40964084_40964103_+	419.566	267.376	266.993	7.99598	1.30957	88.7425	49.4444	37.3635	38.831
ADRM1	chr20_62303680_62303699_+	199.706	144.977	266.993	97.9507	190.543	79.8682	26.4023	4.67044	34.2626
MLNR	chr13_49220804_49220823_-	240.93	516.927	544.456	177.91	367.335	369.76	402.275	202.163	735.505
SCTR	chr2_119473532_119473551_-	225.356	476.524	130.879	48.6422	105.421	212.982	145.933	138.112	86.7987
F11	chr4_186271750_186271769_+	236.349	171.121	136.114	396.467	209.532	198.192	183.856	159.462	246.691
ROSA26	chr3_9381262_9381281_-	2.74825	0	5.23516	19.3236	88.3962	68.0359	41.7637	5.33765	6.85253
PTGS1	chr9_122383650_122383669_-	376.51	49.9102	162.29	368.481	320.191	310.599	254.902	318.924	619.012
GRM7	chr3_7452714_7452733_+	88.86	428.99	73.2922	334.498	119.826	165.653	107.529	109.422	157.608
CDC7	chr1_91511594_91511613_+	121.839	0	0	3.33166	15.7149	32.5389	12.4811	10.6753	2.28418
NTSR1	chr20_62754759_62754778_+	504.762	305.403	335.05	118.607	436.743	458.503	444.519	254.873	445.414
CA14	chr1_150263061_150263080_-	106.266	169.932	209.406	39.3136	367.99	82.8263	112.81	143.449	130.198
TUBB6	chr18_12325345_12325364_-	1169.84	994.639	266.993	343.827	358.823	405.257	274.584	177.477	214.713
RPS6KB2	chr11_67432955_67432974_-	147.489	253.116	104.703	134.599	20.2984	189.317	219.379	46.7044	340.342
SPATA5	chr4_122929150_122929169_-	200.622	68.9236	251.288	37.3146	0	38.4551	45.124	128.771	59.3886
ITK	chr5_157222972_157222991_+	226.272	131.906	104.703	413.125	322.81	207.066	242.901	130.772	107.356
DHX15	chr4_24576244_24576263_-	0.916083	0	15.7055	13.3266	0	53.2455	1.92017	0	0
ROSA26	chr3_9382134_9382153_-	0	0	47.1164	24.6543	4.58351	17.7485	11.041	150.788	89.0829
CD74	chr5_150407267_150407286_+	135.58	105.762	167.525	244.544	437.397	139.03	32.1628	86.7367	111.925
SLC22A8	chr11_62995745_62995764_+	8.24474	179.439	125.644	229.218	170.899	189.317	159.374	109.422	292.375
HTR3A	chr11_113986068_113986087_+	335.286	2.37668	376.931	63.9678	434.778	245.521	259.223	94.7432	68.5253
LTA	chr6_GL000254v2_alt_2915201_2915220_+	127.335	0	52.3516	171.913	489.78	115.365	136.812	162.798	486.53
PCSK4	chr19_1487164_1487183_+	501.097	9.50671	183.231	302.514	242.271	260.311	289.946	110.756	511.655
PBRM1	chr3_52609824_52609843_+	87.0279	265	246.052	195.235	293.999	207.066	112.33	164.8	255.828
CACNA1H	chr16_1204182_1204201_+	5.4965	71.3003	94.2328	67.9658	14.4053	94.6586	36.4832	104.084	95.9354
IDI1	chr10_1042650_1042669_-	162.147	144.977	73.2922	0	53.0377	0	14.4013	2.00162	20.5576
STK38L	chr12_27312651_27312670_+	238.182	0	136.114	363.151	212.806	215.94	203.538	149.454	242.123
CHKA	chr11_68074798_68074817_+	3.66433	161.614	62.8219	68.6321	72.0265	38.4551	69.1261	188.819	84.5145
P2RY6	chr11_73296721_73296740_-	470.867	11.8834	157.055	358.486	149.291	301.724	239.061	300.91	228.418
ROSA26	chr3_9370202_9370221_-	0	29.7085	5.23516	41.9789	180.066	68.0359	43.2038	80.0647	52.536
CSNK1A1	chr5_149507092_149507111_-	151.154	240.044	78.5274	32.6502	383.705	121.281	172.335	81.3991	125.63
PDK2	chr17_50105955_50105974_+	167.643	512.174	20.9406	72.6301	181.376	118.323	170.415	109.422	118.777
CDK20	chr9_87971236_87971255_-	125.503	323.228	439.753	377.81	718.301	313.557	405.156	250.202	354.047
SRPK3	chrX_153781536_153781555_+	527.664	332.735	52.3516	123.938	379.776	541.329	357.152	221.512	484.245
CAMKK1	chr17_3880396_3880415_-	491.02	60.6053	319.345	337.164	199.71	357.928	422.917	500.404	312.932
KCNC3	chr19_50323766_50323785_-	61.3775	134.282	183.231	117.274	144.708	310.599	158.894	510.412	198.723
S1PR3	chr9_89002079_89002098_+	2.74825	148.542	10.4703	82.6251	19.6436	70.994	34.5631	147.452	45.6835
FGA	chr4_154584643_154584662_-	317.881	213.901	303.639	503.08	382.395	180.443	357.152	352.285	180.45
ITPR3	chr6_33671247_33671266_+	10.993	444.439	638.689	349.158	292.035	207.066	342.27	102.082	294.659
TAF1	chrX_71424220_71424239_+	197.874	1.18834	52.3516	163.918	0	212.982	98.8887	104.084	226.133
HCRTR2	chr6_55248746_55248765_-	154.818	512.174	172.76	60.6362	0	171.569	93.6083	122.099	175.882
MGLL	chr3_127781831_127781850_+	354.524	253.116	303.639	149.925	230.485	130.156	173.295	271.553	431.709
AMY2A	chr1_103617489_103617508_+	0.916083	0	0	30.6512	0	0	35.0431	90.74	27.4101
ROSA26	chr3_9366344_9366363_-	13.7412	238.856	287.934	85.9567	498.947	109.449	24.4822	127.436	235.27
DHFR	chr5_80637901_80637920_-	200.622	165.179	314.109	31.3176	208.222	82.8263	28.3225	66.7206	79.9462
GABRR2	chr6_89267722_89267741_+	349.944	19.0134	157.055	123.938	75.3005	50.2874	101.769	129.438	68.5253
TLR7	chrX_12886677_12886696_-	53.1328	144.977	167.525	195.901	108.695	144.946	300.507	168.803	137.051
EPHA10	chr1_37753110_37753129_+	309.636	16.6367	240.817	251.873	716.991	408.215	401.795	615.831	534.497
CDK13	chr7_39999373_39999392_-	86.1118	1.18834	157.055	422.454	335.906	204.108	271.224	267.549	134.766
CD3E	chr11_118312748_118312767_+	145.657	109.327	52.3516	170.581	525.794	425.964	344.19	190.154	655.559
ADRA1B	chr5_159917571_159917590_+	5.4965	0	41.8813	177.91	204.293	73.9521	260.663	100.081	77.662
PSEN1	chr14_73170874_73170893_-	328.874	424.237	308.874	134.599	117.862	292.85	333.629	389.648	312.932
NEK3	chr13_52144736_52144755_+	246.426	234.103	62.8219	15.3256	55.0021	130.156	73.9265	140.113	173.597
UBA3	chr3_69061886_69061905_-	0	0	0	53.3065	50.4186	26.6227	51.8446	32.6931	73.0936
IMPDH1	chr7_128400883_128400902_-	264.748	104.574	167.525	231.217	191.198	337.221	336.51	77.3959	269.533
ITGB2	chr21_44901574_44901593_-	267.496	448.004	219.877	266.533	356.204	381.593	253.942	158.795	475.109
AAVS1	chr19_55173632_55173651_-	401.244	661.905	225.112	334.498	442.636	168.611	328.829	242.863	114.209
SLC8A3	chr14_70168154_70168173_-	154.818	193.699	172.76	21.3226	234.414	50.2874	105.129	222.179	118.777
C5AR2	chr19_47341095_47341114_-	688.894	131.906	214.641	493.752	530.377	147.904	87.8478	146.118	246.691
DRD2	chr11_113424419_113424438_-	644.006	501.479	193.701	694.984	889.855	828.263	500.684	497.068	360.9
TGFBR2	chr3_30672178_30672197_+	262	139.036	136.114	233.216	774.613	133.114	293.306	288.233	267.249
SLC6A19	chr5_1216938_1216957_-	156.65	9.50671	560.162	318.506	350.966	559.078	333.629	230.853	349.479
BCL2L2	chr14_23307948_23307967_-	107.182	110.515	99.468	31.9839	97.5632	62.1197	36.0032	164.133	116.493
JAK2	chr9_5050790_5050809_+	7.32866	8.31837	177.995	91.2874	132.922	115.365	118.57	193.49	54.8202
DHX15	chr4_24556343_24556362_+	2.74825	4.75335	0	113.276	15.0601	115.365	67.2059	36.6963	130.198
LIMK2	chr22_31267857_31267876_+	0.916083	116.457	15.7055	179.909	208.877	91.7006	116.17	146.118	182.734
SCNN1B	chr16_23355435_23355454_-	610.111	409.977	350.756	43.3115	73.3361	366.802	183.856	100.748	107.356
KLK2	chr19_50876555_50876574_-	15.5734	0	5.23516	117.274	250.783	17.7485	27.3624	91.4072	143.903
AAVS1	chr19_55191757_55191776_+	65.958	49.9102	130.879	191.903	19.6436	186.359	102.729	65.3862	169.029
CYP2C8	chr10_95069278_95069297_+	0.916083	55.8519	15.7055	167.916	0.654787	65.0778	83.5274	52.042	31.9785
PAK4	chr19_39173121_39173140_+	439.72	1.18834	298.404	153.256	231.794	357.928	451.24	304.913	317.5
SERPINA1	chr14_KI270847v1_alt_1497553_1497572_-	0.916083	0	15.7055	2.66533	3.92872	85.7844	197.297	54.7109	79.9462
SCN7A	chr2_166443547_166443566_+	1.83217	77.242	31.4109	1.33266	36.0133	2.95808	23.5221	34.0275	66.2411
MAP3K19	chr2_134988204_134988223_+	12.8252	287.578	361.226	28.6522	382.395	82.8263	140.652	71.391	111.925
ENPP2	chr8_119593824_119593843_-	227.189	685.671	162.29	275.195	227.866	168.611	253.942	122.766	219.281
PTK6	chr20_63537206_63537225_+	120.923	71.3003	460.694	102.615	270.427	242.563	277.945	40.0323	162.177
CACNA2D4	chr12_1882886_1882905_-	720.041	231.726	130.879	172.58	348.347	133.114	135.372	140.78	216.997
NDUFB8	chr10_100526517_100526536_-	441.552	162.802	20.9406	39.3136	123.755	62.1197	133.452	49.3732	189.587
IL9	chr5_135895446_135895465_+	0.916083	2.37668	41.8813	0.666331	92.3249	144.946	121.451	29.357	15.9892
SIRT6	chr19_4179260_4179279_+	525.831	450.38	314.109	92.6201	190.543	573.868	308.187	283.562	274.101
DNMT3A	chr2_25240325_25240344_-	41.2237	156.861	167.525	473.762	369.954	352.012	595.733	143.449	422.573
ADRB1	chr10_114044333_114044352_+	152.07	448.004	146.584	259.869	258.641	174.527	238.101	184.149	219.281
PARP2	chr14_20354908_20354927_+	176.804	230.538	115.173	114.609	0	94.6586	203.058	164.133	497.95
ESRRA	chr11_64307437_64307456_+	199.706	400.47	329.815	105.947	206.913	97.6167	145.453	152.123	214.713
CCT2	chr12_69597745_69597764_+	73.2866	2.37668	125.644	127.269	0	8.87425	15.3614	21.3506	38.831
AAVS1	chr19_55166703_55166722_-	436.055	200.829	177.995	211.227	210.841	260.311	182.416	170.137	497.95
P2RY13	chr3_151328771_151328790_+	210.699	55.8519	172.76	175.245	266.498	62.1197	89.2879	92.7416	102.788
MAP3K14	chr17_45287011_45287030_+	215.279	2.37668	136.114	101.282	58.276	62.1197	102.249	97.412	75.3778
TTK	chr6_80007837_80007856_+	131.916	109.327	20.9406	71.2975	84.4675	2.95808	1.44013	15.3457	105.072
PRPF6	chr20_63995360_63995379_+	7.32866	35.6502	146.584	0	0	103.533	47.0442	26.6882	150.756
DDB1	chr11_61313642_61313661_+	2.74825	10.695	94.2328	34.6492	191.198	68.0359	104.649	177.477	2.28418
HSPA5	chr9_125239229_125239248_+	287.65	285.201	15.7055	25.3206	0	62.1197	72.4864	153.457	68.5253
PDE7A	chr8_65747723_65747742_+	52.2167	162.802	219.877	111.944	64.8239	121.281	199.698	152.123	153.04
CXCL8	chr4_73740658_73740677_+	4.58041	366.008	130.879	353.156	192.507	180.443	122.411	194.824	340.342
GPR55	chr2_230910482_230910501_-	60.4615	0	36.6461	148.592	30.775	103.533	98.4087	65.3862	141.619
PSMA7	chr20_62139080_62139099_+	449.797	653.586	52.3516	383.807	320.845	310.599	255.383	460.372	534.497
CACNA1A	chr19_13262763_13262782_+	109.014	32.0851	146.584	194.569	235.723	218.898	144.493	294.905	141.619
SRPK2	chr7_105167424_105167443_-	3.66433	772.42	52.3516	54.6392	24.2271	100.575	195.377	82.7335	153.04
PLA2G2A	chr1_19978433_19978452_+	5.4965	148.542	162.29	251.873	201.674	177.485	146.893	63.3845	89.0829
STK32B	chr4_5456812_5456831_-	241.846	62.9819	193.701	686.321	273.701	153.82	324.029	184.149	264.964
UPF1	chr19_18846075_18846094_+	2.74825	0	0	39.9799	0.654787	14.7904	21.1219	7.33926	36.5468
HTR3D	chr3_184036015_184036034_+	431.475	109.327	83.7625	169.915	1.96436	130.156	78.2469	84.0679	98.2196
PSMC5	chr17_63831765_63831784_+	851.957	230.538	125.644	0	26.8463	5.91616	58.5652	86.0695	123.346
PRKDC	chr8_47953815_47953834_+	7.32866	0	99.468	0.666331	0	29.5808	44.6439	154.792	6.85253
SMPD4	chr2_130172787_130172806_+	523.083	2.37668	99.468	207.229	52.3829	369.76	264.503	210.837	237.554
LNPEP	chr5_96979359_96979378_-	0.916083	590.604	167.525	111.277	92.3249	153.82	109.93	186.818	173.597
CTSD	chr11_1754895_1754914_+	183.217	0	314.109	274.529	264.534	180.443	334.59	140.78	82.2303
SCN4A	chr17_63959363_63959382_+	87.9439	0	57.5867	27.9859	0	0	30.2427	46.0372	15.9892
TLR8	chrX_12919814_12919833_-	115.426	42.7802	120.409	93.9527	144.053	233.689	125.771	96.0776	79.9462
PTAFR	chr1_28150782_28150801_-	1.83217	0	73.2922	14.6593	0	73.9521	14.4013	56.7125	102.788
CD80	chr3_119537324_119537343_+	421.398	108.139	120.409	62.6352	0	26.6227	71.5263	110.756	15.9892
TNFSF13B	chr13_108270077_108270096_-	4.58041	77.242	230.347	276.528	202.329	141.988	144.013	117.428	205.576
TUBA3D	chr2_131480402_131480421_-	337.118	439.685	99.468	220.556	211.496	310.599	160.334	260.21	105.072
CYP2E1	chr10_133531713_133531732_+	30.2307	488.407	198.936	145.26	3.27393	230.73	307.227	150.788	237.554
XDH	chr2_31398634_31398653_+	131	285.201	319.345	141.262	304.476	331.305	436.359	304.913	301.511
ITGA4	chr2_181522255_181522274_-	4.58041	16.6367	83.7625	151.924	324.119	14.7904	75.8467	20.0162	155.324
SSTR5	chr16_1079387_1079406_-	5.4965	484.842	287.934	173.246	185.305	248.479	168.975	162.798	93.6512
AAVS1	chr19_55146274_55146293_+	744.775	109.327	94.2328	187.905	224.592	127.198	83.5274	50.7076	785.757
BANF1	chr11_66003262_66003281_+	813.481	0	413.577	1023.49	345.073	372.718	371.553	208.168	399.731
PDE4C	chr19_18219015_18219034_-	135.58	0	36.6461	330.5	166.971	150.862	230.9	43.3684	57.1044
CA3	chr8_85439877_85439896_-	0	73.677	10.4703	22.6553	0	115.365	7.20064	39.3651	2.28418
POLR3H	chr22_41540781_41540800_-	675.153	255.493	20.9406	19.9899	18.334	35.497	28.8025	20.0162	68.5253
GJC2	chr1_228158029_228158048_-	416.818	87.9371	486.87	191.237	438.052	171.569	231.38	327.598	609.875
SERPINA3	chr14_94614581_94614600_-	257.419	686.86	513.045	671.662	123.1	233.689	284.185	270.885	486.53
MIP	chr12_56454290_56454309_+	41.2237	0	235.582	307.845	4.58351	254.395	166.095	78.7303	107.356
KLK14	chr19_51079541_51079560_-	570.72	1088.52	151.82	355.155	467.518	82.8263	141.612	238.192	68.5253
PDK2	chr17_50108163_50108182_+	220.776	354.125	177.995	254.539	110.004	295.808	402.275	164.8	276.385
NDUFA2	chr5_140647292_140647311_+	153.902	250.739	177.995	0	0	5.91616	8.64076	26.021	0
SLC28A3	chr9_84294216_84294235_+	4.58041	0	73.2922	201.232	73.9909	183.401	346.591	116.761	137.051
POLE	chr12_132648970_132648989_+	249.175	156.861	88.9977	0	0	5.91616	0	2.66882	36.5468
KCNJ14	chr19_48462174_48462193_+	897.761	692.801	387.402	537.729	350.966	4268.51	337.47	459.705	1021.03
INHBA	chr7_41700099_41700118_-	342.615	55.8519	209.406	109.945	186.614	177.485	94.5683	118.095	13.7051
CYP2J2	chr1_59901022_59901041_+	97.1048	154.484	314.109	267.199	64.8239	366.802	151.213	324.929	420.288
GRM2	chr3_51712647_51712666_-	990.285	713.003	162.29	401.131	870.211	349.054	485.323	565.123	712.663
SLC44A1	chr9_105362916_105362935_-	147.489	125.964	10.4703	50.6412	72.0265	70.994	93.6083	54.7109	150.756
SLC6A19	chr5_1221792_1221811_-	1.83217	1.18834	73.2922	137.931	248.819	130.156	78.2469	58.0469	185.018
TGM2	chr20_38156005_38156024_-	324.293	1004.15	193.701	381.808	226.556	420.048	354.271	352.952	532.213
SLC5A8	chr12_101190518_101190537_+	363.685	266.188	146.584	163.251	17.6792	248.479	278.425	118.095	415.72
NDUFA10	chr2_240021218_240021237_+	240.93	501.479	88.9977	55.9718	30.775	85.7844	120.491	225.516	20.5576
CASP5	chr11_104995777_104995796_+	212.531	7.13003	282.699	300.515	125.719	366.802	195.857	288.233	294.659
P2RX7	chr12_121177387_121177406_-	239.098	256.681	88.9977	241.212	173.518	79.8682	243.381	134.776	280.954
PARP3	chr3_51945915_51945934_+	2.74825	87.9371	99.468	320.505	208.222	8.87425	97.4486	66.7206	89.0829
EPHA6	chr3_97475402_97475421_-	10.993	171.121	240.817	6.66331	325.429	139.03	113.77	120.097	70.8095
SRPK1	chr6_35888855_35888874_+	0	0	5.23516	57.3045	96.9084	168.611	24.9622	38.0307	139.335
GJA5	chr1_147758644_147758663_+	262	143.789	177.995	223.887	140.779	322.431	328.829	249.535	319.785
NDUFS3	chr11_47582383_47582402_-	0	2.37668	104.703	9.99497	59.5856	26.6227	0	52.7092	141.619
PSMB7	chr9_124356813_124356832_+	283.07	66.547	293.169	11.3276	116.552	130.156	117.61	171.472	118.777
GPD2	chr2_156550643_156550662_-	630.265	728.452	115.173	178.577	254.057	183.401	303.387	178.811	280.954
GRIN2D	chr19_48414508_48414527_+	425.978	440.874	230.347	85.9567	87.0866	159.736	161.294	110.089	148.471
UBA3	chr3_69062148_69062167_+	60.4615	41.5919	57.5867	100.616	111.969	76.9101	66.2458	11.3425	9.1367
NPEPPS	chr17_47601621_47601640_-	363.685	314.91	492.105	201.898	81.8483	159.736	263.543	302.911	338.058
RBX1	chr22_40964076_40964095_-	358.188	114.081	130.879	9.32864	71.3717	68.0359	36.4832	6.00485	25.1259
MAP3K2	chr2_127318228_127318247_+	0.916083	263.811	62.8219	29.9849	5.89308	38.4551	29.7626	132.107	43.3993
CCR5	chr3_46374514_46374533_+	45.8041	1.18834	94.2328	247.875	406.623	224.814	282.265	216.842	95.9354
THOC5	chr22_29531832_29531851_+	917.915	279.26	424.048	33.9829	23.5723	186.359	168.975	118.763	280.954
MRPL34	chr19_17305929_17305948_+	408.573	293.52	41.8813	7.99598	0	14.7904	106.569	106.086	52.536
IL22	chr12_68253314_68253333_+	540.489	3.56502	204.171	131.267	98.8728	210.024	79.207	230.853	175.882
CCR5	chr3_46373198_46373217_+	131.916	1.18834	157.055	30.6512	54.3473	139.03	100.329	72.0582	68.5253
GPER1	chr7_1092016_1092035_+	322.461	68.9236	130.879	167.916	41.9063	192.275	112.33	65.3862	15.9892
ROSA26	chr3_9379258_9379277_-	452.545	207.959	57.5867	800.93	812.59	153.82	101.769	168.803	246.691
SERPINA1	chr14_KI270847v1_alt_1497659_1497678_-	596.37	46.3452	225.112	283.857	550.676	59.1616	129.611	139.446	319.785
MARK1	chr1_220650680_220650699_-	51.3006	556.142	429.283	272.53	99.5276	485.125	442.119	346.28	121.061
GRIN1	chr9_137161305_137161324_-	156.65	168.744	219.877	168.582	189.888	260.311	237.141	77.3959	221.565
MAPKAP1	chr9_125672353_125672372_+	101.685	57.0403	109.938	285.19	61.5499	53.2455	96.4885	159.462	116.493
ADK	chr10_74200794_74200813_-	687.978	5.94169	251.288	165.25	252.093	295.808	174.735	100.748	212.428
SLAMF7	chr1_160748313_160748332_-	136.496	216.278	99.468	313.842	113.933	337.221	220.339	156.126	166.745
SSTR4	chr20_23036039_23036058_+	152.986	270.941	345.52	130.601	305.785	289.892	187.697	246.866	360.9
GRK6	chr5_177433959_177433978_+	209.783	767.667	115.173	97.9507	305.131	85.7844	73.4465	112.091	89.0829
PADI4	chr1_17339749_17339768_+	314.216	964.931	785.274	219.223	491.09	171.569	324.989	554.448	555.055
NDUFS2	chr1_161209574_161209593_+	132.832	72.4887	20.9406	26.6533	0	32.5389	27.3624	38.0307	2.28418
PADI3	chr1_17273369_17273388_+	443.384	117.646	20.9406	185.906	534.306	251.437	480.042	240.861	388.31
CFD	chr19_861797_861816_+	462.622	1358.27	361.226	446.442	332.632	378.635	484.363	481.722	340.342
BMP10	chr2_68865694_68865713_-	273.909	0	167.525	75.2954	256.676	236.647	73.9265	104.751	27.4101
SPHK2	chr19_48629053_48629072_-	67.7901	236.479	324.58	164.584	356.204	174.527	134.892	108.087	246.691
SUCNR1	chr3_151880620_151880639_-	120.923	0	0	0	0	2.95808	14.4013	2.66882	0
HEBP1	chr12_13000034_13000053_-	361.853	177.062	78.5274	83.2914	149.291	38.4551	121.451	112.758	61.6728
SLC9A3	chr5_482563_482582_+	373.762	234.103	167.525	213.226	339.834	162.695	150.253	216.175	82.2303
TAP2	chr6_GL000254v2_alt_4129863_4129882_+	27.4825	1.18834	73.2922	85.2904	231.794	26.6227	36.4832	117.428	54.8202
GC	chr4_71765620_71765639_+	5.4965	148.542	256.523	17.3246	59.5856	56.2036	15.8414	32.0259	59.3886
CSF1	chr1_109923558_109923577_+	472.699	311.345	120.409	206.563	153.875	62.1197	182.416	143.449	155.324
PGF	chr14_74949469_74949488_-	480.027	281.636	261.758	185.24	213.46	390.467	533.807	346.28	264.964
BPTF	chr17_67922864_67922883_+	511.174	266.188	230.347	41.9789	186.614	266.227	238.101	135.443	20.5576
IL6	chr7_22727569_22727588_-	158.482	13.0717	366.461	177.91	32.0845	328.347	191.057	168.136	248.975
NAE1	chr16_66821494_66821513_+	357.272	73.677	0	103.281	398.11	17.7485	48.9643	115.427	6.85253
KPNB1	chr17_47661157_47661176_+	193.293	8.31837	0	45.3105	0	0	19.2017	0	36.5468
PSME3	chr17_42834355_42834374_+	305.972	335.111	104.703	31.3176	2.61915	186.359	67.686	71.391	201.007
HTR2C	chrX_114848087_114848106_+	2.74825	1.18834	157.055	120.606	94.2893	121.281	222.74	144.784	130.198
CTSD	chr11_1759011_1759030_+	82.4474	299.461	319.345	95.2854	63.5143	328.347	173.295	255.54	264.964
CYP24A1	chr20_54173488_54173507_+	137.412	3.56502	162.29	11.3276	226.556	73.9521	5.76051	30.0243	20.5576
DPP8	chr15_65467123_65467142_-	509.342	87.9371	115.173	99.9497	62.2047	100.575	133.932	132.107	210.144
ACVR2B	chr3_38479805_38479824_+	822.642	409.977	418.813	295.185	36.0133	289.892	28.3225	292.236	356.331
TUBA3E	chr2_130194258_130194277_-	330.706	65.3586	20.9406	109.945	361.442	94.6586	129.611	251.537	239.838
PSMB7	chr9_124413967_124413986_-	5.4965	191.323	94.2328	75.9618	27.501	0	61.4454	194.157	43.3993
HPGDS	chr4_94299585_94299604_+	0.916083	17.8251	5.23516	17.9909	92.3249	59.1616	66.2458	47.3716	223.849
SLC22A8	chr11_63000761_63000780_+	7.32866	256.681	94.2328	36.6482	7.20265	14.7904	208.818	44.0356	141.619
SRD5A3	chr4_55346536_55346555_+	166.727	386.21	219.877	190.571	111.969	479.209	306.747	195.491	210.144
NR1D1	chr17_40097112_40097131_-	745.691	134.282	141.349	115.942	114.588	304.682	122.891	354.286	173.597
ROSA26	chr3_9370155_9370174_+	244.594	185.381	94.2328	77.2944	43.8707	109.449	120.971	418.338	162.177
ADRA2B	chr2_96115644_96115663_-	334.37	172.309	141.349	279.193	291.38	215.94	180.496	150.121	150.756
IL5	chr5_132543359_132543378_+	0	4.75335	209.406	142.595	0	68.0359	99.3688	122.766	61.6728
PARP2	chr14_20354226_20354245_+	233.601	1.18834	120.409	185.906	172.864	100.575	91.6881	110.089	201.007
PSEN2	chr1_226890066_226890085_-	26.5664	0	0	174.579	11.7862	41.4132	57.125	114.092	2.28418
HCN4	chr15_73324130_73324149_-	1.83217	148.542	26.1758	93.9527	6.54787	88.7425	119.051	97.412	308.364
TACR3	chr4_103656257_103656276_+	1.83217	143.789	47.1164	11.3276	15.0601	100.575	171.855	93.4088	77.662
EPHA1	chr7_143401550_143401569_+	108.098	242.421	570.632	211.227	591.272	349.054	240.981	217.509	118.777
CCR5	chr3_46374893_46374912_+	97.1048	0	52.3516	264.534	148.637	94.6586	154.574	14.6785	166.745
CDK20	chr9_87971149_87971168_-	368.265	3.56502	99.468	157.921	128.338	47.3293	131.052	131.44	566.476
CHEK2	chr22_28734427_28734446_+	4.58041	617.936	99.468	190.571	484.542	600.491	440.679	249.535	303.795
RAF1	chr3_12585159_12585178_-	200.622	128.341	78.5274	43.9779	17.6792	97.6167	50.4044	113.425	4.56835
RNPEP	chr1_201997510_201997529_+	7.32866	92.6904	115.173	245.21	384.36	210.024	305.787	229.519	127.914
PSMD8	chr19_38379370_38379389_-	293.146	102.197	57.5867	0	51.0734	91.7006	40.8036	40.0323	365.468
NPY1R	chr4_163326238_163326257_-	1.83217	0	20.9406	25.3206	108.04	62.1197	45.124	90.0728	25.1259
HNRNPK	chr9_83971974_83971993_-	169.475	224.596	266.993	916.206	722.23	189.317	324.029	380.307	842.861
ICAM3	chr19_10334323_10334342_-	135.58	34.4618	303.639	255.205	71.3717	106.491	58.5652	60.0485	185.018
NDUFS5	chr1_39028770_39028789_+	10.0769	26.1434	235.582	8.66231	4.58351	29.5808	4.32038	18.0146	13.7051
AKT1S1	chr19_49873091_49873110_+	203.37	506.232	177.995	113.276	0	100.575	102.249	188.819	123.346
MAPKAPK3	chr3_50640430_50640449_-	6.41258	269.753	57.5867	155.922	311.678	319.473	155.534	244.197	52.536
CTSG	chr14_24574700_24574719_+	20.1538	601.299	157.055	105.947	546.092	218.898	225.62	375.637	70.8095
AAVS1	chr19_55248302_55248321_+	82.4474	423.049	277.463	69.9648	0.654787	310.599	217.939	84.7351	139.335
PROKR1	chr2_68655025_68655044_+	5.4965	131.906	177.995	11.3276	134.886	17.7485	108.01	162.131	50.2519
RPS6KA4	chr11_64368153_64368172_-	0	62.9819	0	125.937	0	47.3293	105.609	26.6882	91.367
NDUFB11	chrX_47144517_47144536_-	1.83217	680.918	0	47.9759	104.111	11.8323	0.960085	202.163	390.594
CACNA2D1	chr7_82084773_82084792_+	216.196	165.179	146.584	311.843	324.119	115.365	250.582	489.062	196.439
ARG2	chr14_67642308_67642327_+	10.0769	130.717	10.4703	85.2904	140.779	20.7066	66.7259	131.44	173.597
SELP	chr1_169611519_169611538_+	288.566	181.816	109.938	42.6452	117.862	65.0778	94.0883	52.042	178.166
HPSE	chr4_83322337_83322356_-	150.238	237.668	481.635	411.126	706.515	334.263	298.106	300.243	219.281
BCAT2	chr19_48799676_48799695_-	465.37	14.2601	193.701	295.185	79.884	260.311	116.17	424.343	13.7051
STK38L	chr12_27312600_27312619_-	488.272	67.7353	15.7055	165.917	49.109	50.2874	93.6083	80.0647	189.587
LPAR5	chr12_6620720_6620739_+	566.139	32.0851	314.109	304.513	109.349	446.67	433.958	274.222	954.786
HRAS	chr11_534202_534221_+	276.657	89.1254	47.1164	391.137	558.533	278.06	210.739	100.748	274.101
AAVS1	chr19_55166953_55166972_-	149.321	30.8968	73.2922	71.2975	112.623	97.6167	123.371	74.727	95.9354
ACE	chr17_63484513_63484532_+	156.65	364.82	151.82	40.6462	172.209	85.7844	61.4454	85.4023	187.302
DHFR	chr5_80633975_80633994_-	0.916083	259.058	20.9406	0	56.9664	0	64.8057	10.0081	11.4209
F8	chrX_154860502_154860521_-	1.83217	0	83.7625	131.267	0	32.5389	13.9212	40.0323	77.662
CSNK1G3	chr5_123575789_123575808_+	2.74825	167.556	73.2922	105.28	75.9553	124.239	45.604	119.43	429.425
LTA	chr6_GL000253v2_alt_2877809_2877828_-	58.6293	374.327	219.877	805.595	1027.36	325.389	327.389	579.802	593.886
PTGDR2	chr11_60853369_60853388_-	728.286	289.955	104.703	491.086	588.653	70.994	202.098	204.832	248.975
AAVS1	chr19_55131729_55131748_+	349.944	87.9371	162.29	91.9537	189.888	204.108	189.137	110.756	31.9785
PARP2	chr14_20351078_20351097_+	3.66433	275.695	214.641	189.904	373.228	115.365	360.512	29.357	63.9569
PARP1	chr1_226385577_226385596_-	127.335	76.0537	125.644	217.224	60.8952	118.323	159.854	78.7303	242.123
USP14	chr18_180264_180283_-	13.7412	217.466	10.4703	322.504	282.868	295.808	199.218	86.0695	210.144
GGPS1	chr1_235342071_235342090_+	0.916083	165.179	20.9406	51.3075	238.342	8.87425	26.8824	39.3651	105.072
NDUFB6	chr9_32572970_32572989_-	5.4965	121.211	177.995	17.3246	0	35.497	21.6019	35.3619	68.5253
FGF1	chr5_142614067_142614086_-	115.426	95.0671	141.349	20.6563	15.7149	106.491	52.3246	125.435	91.367
CA4	chr17_60156668_60156687_+	226.272	251.928	0	3.99799	0	68.0359	1.92017	66.0534	11.4209
SNAP25	chr20_10296993_10297012_+	536.824	161.614	240.817	106.613	43.2159	100.575	99.3688	118.763	347.195
WDR5	chr9_134139947_134139966_-	0.916083	549.012	513.045	1.99899	53.0377	53.2455	67.686	174.141	84.5145
FGF23	chr12_4370696_4370715_+	117.259	0	0	2.66533	46.4899	381.593	149.773	81.3991	38.831
NDUFS2	chr1_161209516_161209535_-	169.475	131.906	293.169	33.3166	0	41.4132	17.2815	75.3942	9.1367
CDK12	chr17_39462539_39462558_+	341.699	2.37668	31.4109	0	0	0	2.88025	18.0146	4.56835
VAMP2	chr17_8162286_8162305_+	119.091	330.358	219.877	92.6201	125.719	91.7006	158.414	184.149	189.587
KDM4A	chr1_43666534_43666553_+	96.1887	2.37668	5.23516	60.6362	181.376	38.4551	106.569	9.34088	15.9892
CPB1	chr3_148828041_148828060_+	4.58041	121.211	214.641	333.832	120.481	109.449	170.895	121.431	9.1367
PRKCE	chr2_46151068_46151087_-	8.24474	32.0851	230.347	324.503	426.921	230.73	252.982	116.761	324.353
AAVS1	chr19_55113274_55113293_+	152.986	848.474	387.402	578.376	724.194	396.383	64.8057	310.251	726.368
GALR2	chr17_76075145_76075164_-	436.055	437.309	444.988	137.931	392.872	378.635	420.517	351.617	262.68
MCHR1	chr22_40679709_40679728_+	455.293	43.9685	434.518	160.586	285.487	207.066	206.898	200.162	93.6512
MST1R	chr3_49895199_49895218_-	76.9509	448.004	460.694	305.18	559.188	334.263	378.273	358.289	454.551
CHRNA5	chr15_78580935_78580954_+	435.139	0	10.4703	46.6432	75.3005	79.8682	42.2437	69.3894	75.3778
CDK15	chr2_201835714_201835733_-	67.7901	66.547	130.879	225.22	176.792	304.682	259.703	106.086	221.565
ERBB4	chr2_211679098_211679117_+	1177.17	376.703	209.406	102.615	511.388	212.982	157.934	320.259	212.428
ERG	chr21_38392366_38392385_+	276.657	247.174	99.468	185.906	243.581	340.179	605.813	159.462	255.828
CYP11B2	chr8_142917205_142917224_-	98.9369	70.112	282.699	133.933	38.6324	171.569	212.179	268.884	303.795
INSR	chr19_7267382_7267401_+	29.3146	634.573	41.8813	147.926	286.797	144.946	255.863	340.942	153.04
MAP3K7	chr6_90560094_90560113_-	225.356	8.31837	73.2922	270.531	354.24	393.425	345.15	209.503	564.191
TGFB1	chr19_41352905_41352924_-	1016.85	382.645	120.409	555.054	471.446	659.652	661.978	383.643	370.037
EZH1	chr17_42720420_42720439_+	425.062	2.37668	167.525	507.078	493.709	278.06	284.665	306.247	427.141
CCKAR	chr4_26482093_26482112_-	400.328	248.363	230.347	317.174	980.87	630.072	490.603	417.004	278.669
BDKRB2	chr14_96240457_96240476_+	224.44	1.18834	172.76	267.199	563.117	349.054	174.255	276.89	342.626
TNIK	chr3_171068951_171068970_+	7.32866	133.094	177.995	438.446	957.953	112.407	165.135	104.084	59.3886
PDE3B	chr11_14867613_14867632_-	8.24474	228.161	120.409	173.246	134.886	177.485	46.5641	182.814	143.903
PDE1A	chr2_182201474_182201493_-	99.853	821.142	136.114	189.238	440.671	133.114	118.09	341.609	187.302
CTSK	chr1_150799545_150799564_+	4.58041	3.56502	136.114	9.99497	80.5388	29.5808	84.4875	38.6979	132.482
STAT1	chr2_190976850_190976869_+	3.66433	0	397.872	47.3095	54.3473	23.6647	47.5242	46.0372	9.1367
ITGAM	chr16_31331264_31331283_-	198.79	310.156	188.466	597.033	413.825	221.856	334.109	86.0695	370.037
PSMD14	chr2_161371262_161371281_+	3.66433	55.8519	109.938	0	0	73.9521	79.207	0	79.9462
SLC12A3	chr16_56870651_56870670_-	584.461	544.259	141.349	118.607	472.101	141.988	138.732	126.102	386.026
INSRR	chr1_156845086_156845105_+	152.986	2.37668	188.466	14.6593	233.759	233.689	127.211	248.868	77.662
ADH1A	chr4_99286934_99286953_+	9.16083	288.766	225.112	171.913	250.129	136.072	210.739	46.7044	239.838
CSF1R	chr5_150073313_150073332_-	1.83217	245.986	73.2922	156.588	333.286	88.7425	91.6881	175.475	75.3778
ICAM3	chr19_10335294_10335313_-	184.133	5.94169	177.995	195.901	240.307	260.311	82.5673	287.566	73.0936
TSSK2	chr22_19132094_19132113_-	327.958	499.102	157.055	161.252	237.033	260.311	232.821	255.54	22.8418
ABL1	chr9_130854817_130854836_+	214.363	134.282	146.584	72.6301	144.708	118.323	48.0042	54.0437	123.346
RXFP2	chr13_31791843_31791862_-	501.097	260.246	83.7625	97.2844	230.485	168.611	95.0484	19.349	43.3993
EPHA2	chr1_16133579_16133598_-	128.252	0	293.169	258.537	420.373	396.383	288.025	413.667	95.9354
PLA2G2E	chr1_19922632_19922651_-	213.447	399.282	172.76	192.57	495.674	245.521	169.935	603.821	290.09
RORC	chr1_151807585_151807604_-	74.2027	0	41.8813	81.2924	104.111	141.988	119.051	130.105	86.7987
PRMT8	chr12_3576941_3576960_+	381.09	20.2018	293.169	441.111	685.562	343.138	287.545	228.852	306.08
P2RY2	chr11_73234297_73234316_+	3.66433	173.497	36.6461	65.3005	104.111	73.9521	102.729	62.7173	11.4209
AR	chrX_67545686_67545705_+	294.979	406.412	429.283	362.484	32.7393	263.269	202.578	150.121	358.616
ADA	chr20_44623038_44623057_-	351.776	2.37668	424.048	167.916	214.77	112.407	83.0473	173.473	212.428
CCR8	chr3_39332634_39332653_+	218.944	0	10.4703	115.275	467.518	139.03	183.856	174.808	13.7051
DHX15	chr4_24576364_24576383_+	171.307	1.18834	109.938	85.9567	174.828	62.1197	47.5242	13.3441	2.28418
ROSA26	chr3_9376085_9376104_+	337.118	301.838	26.1758	154.589	139.47	215.94	140.652	127.436	141.619
AVPR2	chrX_153905823_153905842_-	179.552	11.8834	167.525	531.066	825.031	337.221	242.901	129.438	504.803
CHRM1	chr11_62910876_62910895_+	545.069	299.461	240.817	141.262	0.654787	354.97	337.95	96.7448	399.731
SLC44A1	chr9_105383158_105383177_+	506.594	8.31837	47.1164	112.61	308.405	195.233	79.687	84.7351	45.6835
PDE7B	chr6_136154072_136154091_-	317.881	289.955	172.76	247.875	273.046	70.994	88.3278	64.7189	52.536
PTGER3	chr1_71046903_71046922_-	372.846	3.56502	345.52	279.193	771.993	594.575	484.363	235.524	648.706
HCN4	chr15_73367525_73367544_-	2.74825	106.95	130.879	143.261	159.768	204.108	313.948	182.814	223.849
SLC29A4	chr7_5291132_5291151_-	274.825	0	99.468	3.33166	175.483	76.9101	68.6461	2.66882	22.8418
LSS	chr21_46222700_46222719_+	607.363	305.403	617.749	316.507	457.041	665.569	484.363	256.207	315.216
NEK11	chr3_131029847_131029866_+	188.713	95.0671	214.641	149.258	119.171	189.317	226.58	170.137	223.849
GABRB2	chr5_161459620_161459639_+	10.993	161.614	136.114	17.3246	0.654787	68.0359	90.248	267.549	319.785
AAVS1	chr19_55110243_55110262_+	510.258	14.2601	151.82	42.6452	144.708	85.7844	21.6019	97.412	22.8418
NDUFA1	chrX_119871973_119871992_+	75.1188	52.2869	125.644	0.666331	0	50.2874	9.1208	12.6769	13.7051
CA9	chr9_35679279_35679298_-	5.4965	284.013	151.82	85.2904	36.0133	526.539	334.59	236.858	262.68
RXRA	chr9_134417183_134417202_+	2.74825	10.695	83.7625	97.9507	92.9797	47.3293	75.3667	86.0695	196.439
AKR1A1	chr1_45566593_45566612_-	272.993	588.228	57.5867	127.936	564.426	352.012	604.373	88.0711	251.259
SLC22A1	chr6_160136236_160136255_-	349.944	204.394	235.582	253.872	484.542	97.6167	108.97	305.58	529.929
PIK3C3	chr18_42004476_42004495_-	207.951	0	141.349	10.6613	48.4542	20.7066	36.4832	102.75	20.5576
VIPR2	chr7_159032014_159032033_+	7.32866	388.587	151.82	219.889	126.374	183.401	215.059	232.855	187.302
TUBA1B	chr12_49129516_49129535_+	251.007	105.762	130.879	35.3156	4.58351	97.6167	131.052	196.158	244.407
MAPK7	chr17_19379919_19379938_-	288.566	338.677	287.934	527.734	553.295	278.06	310.587	226.85	472.824
AAVS1	chr19_55253102_55253121_-	350.86	527.622	329.815	233.216	402.039	275.102	239.541	52.042	105.072
KCNN2	chr5_114404638_114404657_-	19.2377	47.5335	0	2.66533	0.654787	8.87425	23.042	176.142	155.324
CETP	chr16_56962089_56962108_-	2.74825	64.1703	10.4703	52.6402	46.4899	38.4551	96.0085	29.357	6.85253
KDM6A	chrX_45070066_45070085_-	206.119	97.4438	36.6461	127.936	85.7771	204.108	228.5	69.3894	196.439
CHRM4	chr11_46386069_46386088_+	912.418	127.152	73.2922	17.9909	89.7058	115.365	130.091	50.7076	47.9677
SGPL1	chr10_70859432_70859451_+	359.104	436.12	314.109	334.498	508.114	372.718	151.693	298.908	299.227
BMPR2	chr2_202555384_202555403_+	7.32866	5.94169	62.8219	111.944	436.088	76.9101	177.136	290.234	111.925
PARP1	chr1_226390558_226390577_-	160.314	401.658	465.929	177.91	29.4654	538.371	318.748	220.178	276.385
ADAM10	chr15_58611904_58611923_-	563.391	161.614	120.409	41.9789	180.721	192.275	237.621	284.23	173.597
STAT3	chr17_42329584_42329603_-	218.944	23.7668	57.5867	85.2904	187.269	121.281	152.653	224.848	54.8202
IFNAR2	chr21_33262834_33262853_-	362.769	304.215	413.577	60.6362	402.694	248.479	177.616	257.541	159.892
TOP1MT	chr8_143331246_143331265_-	490.104	1.18834	136.114	107.946	0	192.275	301.947	89.4056	75.3778
ITGA4	chr2_181475061_181475080_-	144.741	199.641	146.584	73.2965	8.51223	73.9521	48.4843	8.67367	6.85253
MAPK1	chr22_21772891_21772910_+	240.93	71.3003	41.8813	117.274	25.5367	68.0359	121.931	30.0243	61.6728
ABCB11	chr2_168958069_168958088_+	11.9091	0	36.6461	78.6271	42.5611	29.5808	35.0431	194.157	125.63
NOS2	chr17_27781033_27781052_+	4.58041	272.13	136.114	215.225	107.385	53.2455	33.1229	94.076	25.1259
PSME4	chr2_53919160_53919179_+	295.895	175.874	141.349	194.569	77.2648	103.533	139.212	137.444	47.9677
FNTB	chr14_65040840_65040859_-	916.999	10.695	293.169	128.602	68.7526	352.012	199.698	152.79	340.342
MAP2K7	chr19_7910985_7911004_+	18.3217	325.605	52.3516	117.274	102.147	121.281	169.455	82.0663	162.177
KCNK3	chr2_26728169_26728188_+	244.594	276.883	287.934	445.776	623.357	390.467	237.141	240.861	155.324
CREBBP	chr16_3850333_3850352_-	471.783	444.439	99.468	241.212	231.794	162.695	176.656	266.882	342.626
STK10	chr5_172090313_172090332_-	292.23	327.981	99.468	194.569	628.595	201.15	70.0862	172.806	66.2411
BMPR2	chr2_202518864_202518883_-	263.832	419.484	293.169	126.603	292.035	109.449	173.295	74.0598	155.324
ADRA1A	chr8_26864333_26864352_-	753.02	1277.46	303.639	430.45	270.427	766.143	519.406	463.041	363.184
GHR	chr5_42711302_42711321_+	159.398	103.385	120.409	328.501	205.603	195.233	156.494	98.0792	205.576
SGK3	chr8_66793804_66793823_+	248.258	0	10.4703	50.6412	35.3585	2.95808	71.5263	2.00162	0
GJA1	chr6_121447111_121447130_-	2.74825	333.923	125.644	31.3176	0.654787	127.198	96.4885	140.113	86.7987
BRAF	chr7_140850178_140850197_-	0.916083	0	219.877	139.93	443.945	159.736	153.134	185.483	175.882
CACNG5	chr17_66880648_66880667_-	390.251	566.838	219.877	53.9728	60.2404	171.569	178.096	335.604	166.745
ITGB6	chr2_160172563_160172582_+	226.272	19.0134	68.0571	79.2934	343.108	301.724	338.43	385.645	436.278
EPHB6	chr7_142867030_142867049_-	2.74825	76.0537	256.523	198.567	339.834	257.353	307.707	60.7157	134.766
GRIK4	chr11_120905331_120905350_+	231.769	244.798	146.584	643.676	235.723	334.263	481.002	391.65	379.173
POLD1	chr19_50406437_50406456_-	185.049	237.668	136.114	407.795	233.759	76.9101	117.61	158.128	146.187
ADRA1A	chr8_26864192_26864211_-	252.839	573.968	115.173	115.942	243.581	405.257	389.794	249.535	324.353
MLKL	chr16_74695673_74695692_-	309.636	74.8653	73.2922	233.216	18.9888	180.443	191.057	78.7303	68.5253
SLC23A1	chr5_139379724_139379743_-	1496.88	1270.33	528.751	417.79	251.438	1940.5	630.776	487.06	1082.7
GJB4	chr1_34761438_34761457_-	543.237	16.6367	209.406	251.207	493.709	301.724	91.208	254.873	278.669
CA6	chr1_8949419_8949438_-	152.986	446.815	230.347	201.232	17.6792	260.311	275.544	312.252	292.375
RXRB	chr6_GL000254v2_alt_4633749_4633768_+	37.5594	597.734	198.936	667.664	587.344	289.892	196.337	258.209	89.0829
NGF	chr1_115286581_115286600_-	616.524	155.672	183.231	121.939	292.69	47.3293	108.01	86.0695	153.04
BCL2L10	chr15_52112645_52112664_-	3.66433	158.049	298.404	101.282	3.27393	121.281	52.3246	37.3635	98.2196
CSF2	chr5_132074815_132074834_+	475.447	414.73	209.406	635.68	678.359	417.09	229.46	264.213	264.964
HNRNPK	chr9_83974514_83974533_-	110.846	112.892	62.8219	0	0	5.91616	0	30.0243	0
STK33	chr11_8461875_8461894_-	372.846	117.646	193.701	439.112	146.672	278.06	290.906	56.7125	221.565
ATP1B1	chr1_169130012_169130031_-	243.678	65.3586	314.109	371.147	307.75	343.138	172.335	541.104	568.76
NEK6	chr9_124326417_124326436_+	11.9091	341.053	115.173	425.119	766.1	417.09	555.409	241.528	301.511
WDR75	chr2_189455420_189455439_-	5.4965	0	73.2922	15.992	52.3829	50.2874	146.413	50.7076	70.8095
KCNC3	chr19_50323885_50323904_+	328.874	275.695	439.753	641.011	541.509	402.299	409.476	379.64	335.774
IL5	chr5_132542078_132542097_-	198.79	219.843	115.173	96.6181	119.171	192.275	159.854	138.779	255.828
POLR2L	chr11_842467_842486_-	22.9021	367.197	246.052	0.666331	0	0	46.5641	182.147	207.86
FGFR1	chr8_38424564_38424583_-	395.748	152.107	219.877	342.494	334.596	177.485	319.708	192.822	374.605
FGF23	chr12_4370765_4370784_+	112.678	2.37668	434.518	113.943	160.423	165.653	185.776	412.333	205.576
CCL2	chr17_34255390_34255409_+	69.6223	154.484	403.107	234.549	257.331	224.814	172.815	262.879	386.026
CHRM4	chr11_46385779_46385798_-	179.552	174.686	120.409	447.108	222.627	455.545	555.409	485.058	568.76
PDE8A	chr15_85113960_85113979_-	416.818	47.5335	130.879	163.918	138.815	136.072	135.852	118.095	230.702
ADRA2C	chr4_3767101_3767120_-	309.636	527.622	533.986	347.825	804.078	816.431	570.77	429.013	504.803
MAPKAP1	chr9_125669845_125669864_-	256.503	127.152	15.7055	73.2965	86.4318	41.4132	0	113.425	93.6512
RPS11	chr19_49497563_49497582_+	81.5314	487.219	109.938	45.3105	0.654787	70.994	147.853	48.706	164.461
PTGER3	chr1_71047128_71047147_+	275.741	326.793	329.815	143.928	0	260.311	299.066	128.771	422.573
TESK2	chr1_45355357_45355376_-	191.461	8.31837	0	140.596	64.1691	62.1197	137.772	41.3667	187.302
P2RY10	chrX_78961380_78961399_-	190.545	322.04	209.406	47.9759	89.051	23.6647	90.248	141.448	111.925
PSME1	chr14_24137719_24137738_+	14.6573	83.1837	99.468	102.615	149.946	41.4132	4.32038	35.3619	61.6728
SHQ1	chr3_72841079_72841098_+	3.66433	407.6	335.05	267.865	57.6212	165.653	210.259	116.094	43.3993
KEAP1	chr19_10491910_10491929_-	129.168	764.102	287.934	393.136	510.734	65.0778	141.132	306.915	70.8095
SIRT3	chr11_224066_224085_+	79.6992	236.479	26.1758	12.6603	0.654787	5.91616	28.3225	110.756	105.072
SYK	chr9_90844080_90844099_+	7.32866	270.941	99.468	124.604	41.9063	352.012	127.691	42.034	143.903
ADH1C	chr4_99347767_99347786_-	173.14	58.2286	225.112	60.6362	136.196	266.227	160.334	66.0534	141.619
CDK10	chr16_89691486_89691505_+	313.3	98.6321	78.5274	9.99497	374.538	23.6647	88.8078	24.6866	68.5253
TNFSF11	chr13_42606520_42606539_-	103.517	73.677	88.9977	58.6372	79.884	245.521	206.418	66.0534	287.806
INHBA	chr7_41700088_41700107_-	240.014	522.869	282.699	254.539	95.5989	103.533	184.816	43.3684	79.9462
SIK2	chr11_111705039_111705058_+	241.846	9.50671	41.8813	155.922	28.1558	144.946	70.5662	125.435	36.5468
EPHA3	chr3_89341802_89341821_-	154.818	184.192	62.8219	78.6271	193.817	76.9101	128.171	110.756	105.072
RAB27A	chr15_55223963_55223982_-	2.74825	0	287.934	91.2874	162.387	38.4551	74.8866	112.091	84.5145
IL13	chr5_132658227_132658246_-	183.217	112.892	282.699	157.921	18.9888	366.802	365.792	160.797	141.619
DNPEP	chr2_219384385_219384404_+	435.139	147.354	403.107	188.572	29.4654	319.473	190.097	192.822	77.662
HDAC7	chr12_47798103_47798122_+	137.412	111.704	88.9977	427.785	416.444	118.323	103.689	33.3603	121.061
KRAS	chr12_25245310_25245329_+	0	0	157.055	150.591	33.3941	62.1197	72.9664	206.834	139.335
SMO	chr7_129205611_129205630_+	8.24474	1.18834	345.52	129.935	319.536	121.281	203.538	182.814	283.238
AOX1	chr2_200599740_200599759_-	0	2.37668	120.409	202.565	0	70.994	156.494	0.667206	0
FLT3	chr13_28018548_28018567_+	204.286	203.206	282.699	77.9608	138.16	23.6647	22.0819	76.7286	63.9569
ALOX12	chr17_6998778_6998797_+	0	3.56502	73.2922	47.9759	151.256	121.281	203.538	56.7125	41.1152
BRD1	chr22_49823451_49823470_-	380.174	289.955	204.171	151.257	267.153	307.641	216.499	94.7432	185.018
MAP3K14	chr17_45290539_45290558_-	503.845	10.695	99.468	178.577	79.2292	357.928	274.584	272.887	166.745
TAP2	chr6_GL000254v2_alt_4129716_4129735_+	361.853	0	57.5867	21.9889	55.6569	141.988	57.6051	42.034	50.2519
PDGFRA	chr4_54272411_54272430_+	34.8111	4.75335	83.7625	234.549	345.073	295.808	157.454	199.494	173.597
CPT1B	chr22_50576295_50576314_+	1.83217	194.888	104.703	208.562	203.639	91.7006	217.939	113.425	27.4101
HSD11B1	chr1_209706781_209706800_-	1.83217	192.511	109.938	322.504	193.817	53.2455	42.7238	138.779	22.8418
KCNQ2	chr20_63439683_63439702_-	262.916	862.734	266.993	129.268	151.911	257.353	392.195	463.041	616.728
GNB2L1	chr5_181243681_181243700_+	142.909	0	141.349	1.99899	37.3228	147.904	37.4433	91.4072	0
QPCT	chr2_37352844_37352863_+	83.3635	14.2601	62.8219	361.818	247.509	215.94	115.21	143.449	169.029
AURKA	chr20_56384312_56384331_-	0.916083	59.4169	26.1758	4.66432	0	0	0	0.667206	29.6943
HCFC1	chrX_153956725_153956744_+	78.7831	326.793	193.701	85.9567	248.819	399.341	312.508	212.171	262.68
PSMD3	chr17_39984452_39984471_-	255.587	519.304	136.114	21.3226	150.601	41.4132	4.80042	41.3667	166.745
AAVS1	chr19_55114727_55114746_-	305.972	1.18834	162.29	49.3085	0.654787	201.15	159.854	290.902	363.184
CACNA2D3	chr3_54752659_54752678_+	159.398	135.471	293.169	213.892	324.774	272.144	437.799	282.895	541.35
UPF1	chr19_18856944_18856963_-	0	0	209.406	97.2844	48.4542	29.5808	139.692	133.441	91.367
ATR	chr3_142566158_142566177_+	71.4545	52.2869	62.8219	181.908	142.743	53.2455	81.1272	177.477	169.029
RBP4	chr10_93600915_93600934_-	489.188	211.524	272.228	192.57	265.189	496.958	240.981	229.519	246.691
IL1R1	chr2_102166238_102166257_+	163.979	224.596	5.23516	99.9497	142.089	97.6167	143.053	88.0711	98.2196
CCR5	chr3_46375642_46375661_+	0	0	214.641	71.2975	54.3473	82.8263	184.816	14.0113	148.471
SLC27A1	chr19_17497251_17497270_+	34.8111	293.52	104.703	375.145	395.491	254.395	299.066	172.806	105.072
CIAO1	chr2_96267394_96267413_-	163.979	242.421	335.05	0	0	32.5389	3.3603	0	13.7051
CCR5	chr3_46375244_46375263_+	114.51	344.618	5.23516	158.587	72.0265	97.6167	105.609	34.6947	95.9354
GP1BA	chr17_4933685_4933704_-	19.2377	218.654	31.4109	150.591	598.475	76.9101	198.738	158.795	36.5468
IDE	chr10_92506458_92506477_+	236.349	177.062	240.817	63.9678	153.22	68.0359	25.4422	116.094	228.418
LIPF	chr10_88667569_88667588_+	95.2726	24.9551	36.6461	104.614	68.0978	112.407	168.495	122.099	392.878
GDF2	chr10_47325019_47325038_+	98.0209	551.389	235.582	20.6563	335.251	266.227	245.302	195.491	271.817
TESK2	chr1_45345452_45345471_+	1.83217	1.18834	125.644	427.118	749.076	254.395	315.868	282.228	187.302
CCR5	chr3_46375371_46375390_-	241.846	533.564	204.171	309.844	241.616	488.084	308.667	361.625	185.018
CSE1L	chr20_49072390_49072409_-	4.58041	244.798	219.877	31.3176	0	53.2455	35.5231	38.0307	29.6943
CA3	chr8_85439721_85439740_-	20.1538	237.668	183.231	215.225	390.908	153.82	239.061	85.4023	182.734
GRM7	chr3_7578547_7578566_-	163.063	21.3901	162.29	97.9507	81.8483	136.072	191.057	98.0792	59.3886
TBCD	chr17_82870359_82870378_+	147.489	161.614	47.1164	63.3015	67.443	236.647	160.814	114.092	63.9569
PAK4	chr19_39173800_39173819_-	260.167	584.663	225.112	57.3045	83.1579	378.635	308.667	298.241	171.313
PDE8B	chr5_77409024_77409043_-	773.174	117.646	104.703	239.879	216.734	390.467	154.094	569.794	342.626
LATS2	chr13_20989231_20989250_+	397.58	787.869	251.288	411.126	686.871	254.395	381.634	117.428	271.817
HCRTR2	chr6_55248651_55248670_+	85.1957	216.278	151.82	78.6271	173.518	118.323	160.334	144.116	102.788
PPIA	chr7_44799256_44799275_+	147.489	269.753	204.171	651.006	491.745	85.7844	78.2469	160.797	386.026
AAVS1	chr19_55150026_55150045_-	233.601	114.081	235.582	171.247	145.363	112.407	72.4864	91.4072	9.1367
INPP5A	chr10_132710430_132710449_+	7.32866	475.335	240.817	176.578	267.808	307.641	229.94	183.482	212.428
MAP3K19	chr2_134998880_134998899_+	174.056	59.4169	130.879	326.502	629.25	514.706	493.004	388.981	194.155
PIM2	chrX_48915125_48915144_+	411.321	77.242	293.169	288.521	431.504	121.281	187.697	403.659	201.007
PDGFD	chr11_104163833_104163852_+	226.272	192.511	10.4703	369.814	390.908	183.401	275.544	154.124	91.367
GCK	chr7_44145624_44145643_+	182.3	350.56	68.0571	492.419	654.132	183.401	128.171	180.813	221.565
ADK	chr10_74398528_74398547_+	0	0	20.9406	20.6563	0	8.87425	28.8025	0	100.504
FARSA	chr19_12925107_12925126_-	309.636	174.686	183.231	63.9678	94.9441	47.3293	112.33	27.3554	143.903
BRSK1	chr19_55302744_55302763_-	4.58041	420.672	41.8813	263.867	195.781	186.359	223.22	112.758	66.2411
ARG1	chr6_131583419_131583438_+	339.867	331.546	251.288	84.6241	369.954	437.796	429.158	318.924	459.119
CPT2	chr1_53210019_53210038_-	0	0	5.23516	29.9849	110.659	8.87425	12.0011	73.3926	29.6943
SLC6A1	chr3_11031241_11031260_-	17.4056	0	104.703	3.99799	0	56.2036	79.207	122.099	189.587
CYP3A5	chr7_99660559_99660578_+	85.1957	218.654	31.4109	172.58	60.2404	109.449	137.292	43.3684	45.6835
ADRA2C	chr4_3766775_3766794_-	453.461	476.524	272.228	785.605	367.99	544.287	492.043	381.642	210.144
SMARCA4	chr19_10989418_10989437_+	496.517	301.838	162.29	0	0	269.185	174.255	14.6785	109.64
FZD2	chr17_44558555_44558574_+	676.985	106.95	209.406	167.916	327.393	245.521	208.818	322.26	454.551
KCNA2	chr1_110604271_110604290_-	241.846	217.466	193.701	199.899	17.0245	121.281	228.5	164.133	134.766
JAK1	chr1_64846640_64846659_+	9.16083	822.33	272.228	337.83	544.783	283.976	399.395	294.238	212.428
F2RL3	chr19_16890182_16890201_-	214.363	185.381	115.173	211.893	405.313	269.185	296.186	489.729	363.184
PTHLH	chr12_27963721_27963740_+	448.881	15.4484	146.584	325.17	258.641	283.976	161.294	224.181	157.608
IL13	chr5_132659445_132659464_+	163.063	272.13	62.8219	124.604	134.886	242.563	92.1681	83.4007	50.2519
SRD5A2	chr2_31533630_31533649_-	459.874	263.811	78.5274	193.902	89.7058	310.599	114.25	189.486	214.713
MBTPS1	chr16_84068346_84068365_+	185.049	1.18834	20.9406	49.3085	0.654787	334.263	270.264	232.855	2.28418
CSNK1G3	chr5_123545724_123545743_+	71.4545	40.4035	20.9406	79.2934	490.435	257.353	230.9	243.53	150.756
TIE1	chr1_43307891_43307910_-	419.566	648.833	246.052	470.43	709.134	701.066	356.191	503.74	344.911
ITGB7	chr12_53196803_53196822_+	0	4.75335	26.1758	43.3115	210.841	168.611	270.264	151.456	210.144
AAVS1	chr19_55229947_55229966_-	172.224	307.78	507.81	51.3075	0	136.072	84.0074	140.78	157.608
MAPK3	chr16_30121933_30121952_+	9.16083	86.7487	83.7625	55.3055	0	174.527	192.497	99.4136	79.9462
GLRB	chr4_157136656_157136675_-	0.916083	175.874	0	112.61	52.3829	56.2036	139.692	52.7092	73.0936
NDUFB5	chr3_179623971_179623990_-	131	30.8968	5.23516	39.9799	0	100.575	26.4023	0	0
ROSA26	chr3_9371262_9371281_-	67.7901	48.7219	10.4703	118.607	0	65.0778	27.3624	41.3667	155.324
KCNH1	chr1_210797527_210797546_+	87.9439	58.2286	99.468	246.543	415.79	53.2455	136.812	159.462	61.6728
FARSA	chr19_12924152_12924171_-	308.72	125.964	246.052	287.189	94.9441	183.401	227.54	227.517	404.299
DRD4	chr11_639806_639825_-	254.671	2.37668	57.5867	64.6341	223.282	112.407	147.853	116.094	134.766
NDUFA6	chr22_42090657_42090676_-	111.762	160.426	523.516	44.6442	138.815	97.6167	96.4885	96.7448	41.1152
LRRK2	chr12_40263790_40263809_+	175.888	207.959	240.817	151.257	406.623	73.9521	212.659	92.0744	114.209
CD200	chr3_112345204_112345223_-	66.874	193.699	57.5867	265.866	91.6701	32.5389	72.9664	61.3829	130.198
NDUFAF3	chr3_49022865_49022884_+	23.8182	210.336	319.345	0	0	68.0359	54.7248	1.33441	41.1152
PGF	chr14_74949506_74949525_+	567.971	8.31837	319.345	185.24	275.665	139.03	239.061	292.236	189.587
FNTB	chr14_65027558_65027577_+	13.7412	476.524	251.288	16.6583	32.0845	139.03	78.2469	92.7416	212.428
ROSA26	chr3_9370978_9370997_+	2.74825	304.215	293.169	79.9598	3.27393	286.934	180.016	157.461	283.238
UBA3	chr3_69063024_69063043_+	1.83217	2.37668	230.347	111.944	54.3473	8.87425	38.8834	119.43	75.3778
ERAP2	chr5_96880156_96880175_+	4.58041	23.7668	5.23516	60.6362	147.982	5.91616	148.813	268.217	159.892
LATS2	chr13_20987910_20987929_-	480.027	129.529	266.993	65.3005	232.449	70.994	143.053	56.0453	2.28418
ANO1	chr11_70111752_70111771_-	330.706	47.5335	376.931	376.477	32.0845	118.323	90.728	211.504	274.101
KCNB2	chr8_72567952_72567971_-	5.4965	136.659	20.9406	133.266	266.498	189.317	107.049	161.464	100.504
CTSC	chr11_88294498_88294517_-	8.24474	339.865	225.112	400.465	631.214	283.976	56.165	203.498	105.072
PTHLH	chr12_27963642_27963661_-	229.937	3.56502	52.3516	241.212	448.529	174.527	207.858	250.202	276.385
MAP4K3	chr2_39309477_39309496_+	114.51	471.77	240.817	183.241	39.2872	174.527	260.183	122.099	301.511
PPWD1	chr5_65587296_65587315_+	28.3986	4.75335	20.9406	27.3196	0	0	0.960085	26.021	93.6512
BACE1	chr11_117315553_117315572_-	283.07	602.488	188.466	199.233	1.30957	141.988	102.729	146.785	207.86
PAH	chr12_102852886_102852905_+	5.4965	111.704	282.699	276.528	848.604	266.227	252.502	494.399	354.047
LTB4R2	chr14_24310710_24310729_+	1058.99	161.614	256.523	350.49	79.884	218.898	172.815	312.252	431.709
TNFRSF8	chr1_12123803_12123822_-	193.293	209.148	282.699	141.262	102.802	230.73	295.706	296.907	194.155
VPS25	chr17_42773735_42773754_+	41.2237	238.856	460.694	4.66432	69.4074	97.6167	16.8015	20.6834	27.4101
SLC6A3	chr5_1420672_1420691_-	46.7202	615.559	136.114	311.177	278.939	390.467	402.756	323.595	155.324
NOS1	chr12_117247485_117247504_+	9.16083	316.098	136.114	565.715	189.888	153.82	323.549	272.22	139.335
GRK5	chr10_119452673_119452692_-	218.944	241.233	204.171	347.825	159.768	452.587	168.975	298.908	77.662
AGTR1	chr3_148741281_148741300_-	68.7062	0	57.5867	36.6482	131.612	227.772	126.731	149.454	127.914
SLC1A3	chr5_36629475_36629494_+	495.601	455.134	31.4109	32.6502	196.436	343.138	281.305	130.105	616.728
NAMPT	chr7_106274947_106274966_-	243.678	45.1569	272.228	330.5	156.494	168.611	130.091	267.549	118.777
SLC22A2	chr6_160258480_160258499_-	399.412	206.771	209.406	475.094	665.918	281.018	313.948	352.952	746.926
P2RY1	chr3_152836401_152836420_-	401.244	53.4752	68.0571	291.187	449.184	254.395	412.356	471.047	157.608
MC3R	chr20_56249165_56249184_-	0.916083	0	125.644	11.3276	46.4899	70.994	65.2858	22.0178	66.2411
ROSA26	chr3_9363154_9363173_-	514.838	585.851	403.107	279.859	435.433	254.395	319.708	315.588	100.504
PRLHR	chr10_118594749_118594768_+	557.894	1.18834	387.402	239.213	36.6681	186.359	204.978	494.399	248.975
EEF2	chr19_3976682_3976701_+	4.58041	64.1703	198.936	10.6613	0	29.5808	61.9255	162.798	214.713
PRKD1	chr14_29927260_29927279_+	99.853	446.815	246.052	43.9779	381.086	304.682	320.668	150.788	788.041
XPNPEP2	chrX_129745210_129745229_+	1270.61	395.717	109.938	269.198	27.501	272.144	395.075	321.593	422.573
SIRT1	chr10_67887526_67887545_-	229.937	223.408	204.171	220.556	243.581	295.808	378.273	257.541	169.029
GABRA3	chrX_152189895_152189914_+	366.433	159.237	209.406	211.893	564.426	88.7425	107.049	68.7222	388.31
CCR3	chr3_46265198_46265217_+	8.24474	207.959	429.283	83.2914	202.984	195.233	106.089	124.767	322.069
NPC1L1	chr7_44539016_44539035_+	255.587	93.8788	225.112	221.222	207.567	387.509	350.911	262.879	173.597
PIK3R3	chr1_46077576_46077595_-	4.58041	4.75335	188.466	242.545	191.198	183.401	290.426	290.902	235.27
PLK4	chr4_127891617_127891636_-	4.58041	386.21	62.8219	204.564	206.258	159.736	171.855	230.186	187.302
ECE1	chr1_21290079_21290098_-	149.321	133.094	120.409	116.608	66.1335	470.335	381.154	435.685	468.256
NOTCH3	chr19_15188284_15188303_-	534.076	379.08	240.817	183.241	39.942	304.682	192.017	236.858	203.292
SLC22A2	chr6_160256679_160256698_+	169.475	3.56502	141.349	184.574	261.915	295.808	257.303	376.304	372.321
NOL9	chr1_6526800_6526819_-	231.769	411.165	120.409	1.33266	17.0245	44.3712	138.732	81.3991	95.9354
IL2RB	chr22_37128626_37128645_+	18.3217	394.528	162.29	175.245	220.008	56.2036	112.33	211.504	130.198
PANX1	chr11_94179845_94179864_+	483.692	455.134	277.463	207.895	4.58351	239.605	230.9	294.905	219.281
PRMT7	chr16_68337550_68337569_+	649.503	477.712	649.16	115.942	1.30957	112.407	80.6471	152.79	132.482
RORB	chr9_74660717_74660736_+	181.384	81.9954	57.5867	167.249	324.774	59.1616	112.33	118.095	267.249
APOH	chr17_66220694_66220713_+	550.566	97.4438	41.8813	87.9557	296.618	248.479	97.9286	246.199	189.587
TUBB2A	chr6_3154587_3154606_-	327.958	156.861	214.641	177.244	137.505	248.479	284.665	189.486	246.691
IL22	chr12_68252550_68252569_-	353.608	249.551	308.874	123.271	284.177	162.695	94.5683	118.763	57.1044
SLC5A11	chr16_24898030_24898049_+	121.839	166.367	36.6461	89.2884	18.9888	195.233	67.2059	244.197	141.619
ITPR1	chr3_4806142_4806161_+	399.412	261.434	57.5867	228.552	14.4053	165.653	184.816	296.239	15.9892
HRH2	chr5_175683559_175683578_+	423.23	430.179	193.701	487.088	418.409	156.778	145.453	254.205	504.803
ESRRG	chr1_216677386_216677405_+	645.838	270.941	272.228	277.194	40.5968	180.443	280.825	96.7448	139.335
PRCP	chr11_82850374_82850393_-	421.398	158.049	303.639	189.238	187.924	183.401	279.865	170.137	504.803
CTSH	chr15_78925387_78925406_+	235.433	317.286	36.6461	144.594	98.8728	100.575	42.7238	241.528	121.061
FRK	chr6_116059998_116060017_-	3.66433	24.9551	0	105.28	0.654787	215.94	189.137	29.357	111.925
DEGS1	chr1_224190030_224190049_-	324.293	169.932	188.466	322.504	395.491	248.479	453.64	235.524	888.544
PLA2G1B	chr12_120325860_120325879_+	457.125	156.861	183.231	349.158	1001.82	301.724	288.986	219.511	328.921
PROKR2	chr20_5314111_5314130_+	159.398	72.4887	83.7625	288.521	513.353	263.269	169.935	300.243	360.9
PSMA6	chr14_35312954_35312973_+	0	3.56502	136.114	37.3146	32.0845	17.7485	56.645	9.34088	57.1044
OXTR	chr3_8767911_8767930_+	192.377	286.39	141.349	281.192	98.218	357.928	268.344	257.541	153.04
MAP2K1	chr15_66481765_66481784_-	159.398	92.6904	31.4109	393.136	173.518	141.988	276.984	66.7206	52.536
CFD	chr19_860679_860698_+	377.426	589.416	177.995	537.729	216.734	180.443	139.212	394.986	251.259
SIRT6	chr19_4175914_4175933_-	601.866	930.469	717.217	361.152	826.341	349.054	520.846	273.554	137.051
DYRK3	chr1_206648153_206648172_-	0.916083	135.471	5.23516	35.3156	0	130.156	71.5263	36.6963	9.1367
AVPR1B	chr1_206116187_206116206_-	2.74825	2.37668	20.9406	19.3236	6.54787	70.994	80.1671	115.427	36.5468
P4HB	chr17_81846560_81846579_+	1.83217	10.695	151.82	159.92	101.492	91.7006	142.093	116.761	237.554
CDK20	chr9_87971156_87971175_+	392.999	52.2869	26.1758	109.278	256.022	38.4551	127.211	156.126	185.018
BPTF	chr17_67911770_67911789_-	0.916083	0	0	53.3065	0	50.2874	0.480042	6.67206	0
NDUFAB1	chr16_23596161_23596180_-	91.6083	0	141.349	67.2995	5.89308	14.7904	19.6817	114.092	9.1367
UCHL3	chr13_75604777_75604796_+	3.66433	67.7353	99.468	2.66533	13.7505	8.87425	31.6828	45.37	45.6835
BANF1	chr11_66003289_66003308_+	102.601	265	104.703	19.3236	164.351	2.95808	11.521	148.12	45.6835
MRPL45	chr17_38318701_38318720_-	52.2167	173.497	104.703	122.605	0	41.4132	139.212	134.108	123.346
GNRHR	chr4_67740500_67740519_+	3.66433	206.771	109.938	33.3166	147.327	106.491	144.493	132.107	77.662
PSMD13	chr11_247314_247333_-	1.83217	84.372	104.703	10.6613	7.85744	0	5.76051	98.7464	29.6943
PDGFD	chr11_103943594_103943613_+	126.419	108.139	47.1164	109.945	79.884	186.359	276.504	68.055	45.6835
AVPR1A	chr12_63150646_63150665_-	525.831	390.963	246.052	115.942	18.9888	124.239	221.78	230.186	198.723
CD40	chr20_46123123_46123142_-	178.636	141.412	78.5274	502.414	396.801	70.994	136.332	118.095	173.597
SERPINA1	chr14_KI270847v1_alt_1497625_1497644_+	155.734	351.748	15.7055	271.197	85.7771	65.0778	114.25	147.452	91.367
LAP3	chr4_17585104_17585123_+	0.916083	1.18834	0	119.94	393.527	159.736	81.1272	48.706	59.3886
PRKX	chrX_3655174_3655193_+	344.447	230.538	99.468	54.6392	402.694	141.988	173.295	210.17	127.914
ACACB	chr12_109179268_109179287_-	129.168	615.559	225.112	370.48	789.673	331.305	153.614	243.53	111.925
SIGMAR1	chr9_34637257_34637276_+	309.636	0	193.701	369.148	64.8239	198.192	202.098	368.298	274.101
ERBB2	chr17_39708349_39708368_+	118.175	187.758	481.635	130.601	557.223	316.515	262.103	147.452	143.903
RPTOR	chr17_80947272_80947291_+	4.58041	57.0403	109.938	78.6271	324.774	29.5808	3.3603	24.0194	59.3886
CYP11A1	chr15_74347930_74347949_+	16.4895	228.161	120.409	35.9819	46.4899	248.479	144.013	246.199	134.766
MMP13	chr11_102947892_102947911_-	43.972	109.327	329.815	213.226	87.7414	458.503	464.201	429.013	472.824
PTGER2	chr14_52314808_52314827_-	18.3217	1.18834	125.644	812.924	572.938	272.144	314.428	330.267	253.544
HTR2B	chr2_231113749_231113768_-	1.83217	135.471	183.231	305.18	349.001	26.6227	41.2836	30.6915	111.925
PIK3R5	chr17_8887604_8887623_-	346.279	178.251	219.877	235.215	12.4409	192.275	143.533	187.485	45.6835
KCND3	chr1_111981698_111981717_+	139.245	1.18834	94.2328	21.3226	0	14.7904	1.92017	103.417	77.662
CDK2	chr12_55968926_55968945_-	544.153	73.677	52.3516	83.2914	171.554	97.6167	110.41	62.0501	47.9677
AAVS1	chr19_55248462_55248481_+	43.972	505.044	20.9406	61.3025	122.445	133.114	180.496	105.418	246.691
MAP3K13	chr3_185428782_185428801_+	476.363	109.327	125.644	329.834	694.074	275.102	357.152	364.294	292.375
BUB1	chr2_110674103_110674122_+	0.916083	327.981	15.7055	125.27	175.483	118.323	227.06	30.0243	4.56835
TXNRD1	chr12_104325368_104325387_-	319.713	11.8834	68.0571	136.598	11.1314	11.8323	47.5242	69.3894	82.2303
[truncated: 9,397 more rows]

## Sheet: Score
Gene	sgAAVS1	AFDKO	PTDKO
CLK2	-4.7387	2.0946	-1.121
MMP11	-4.6422	-0.39422	-1.1866
PI4K2B	-4.4926	4.643	-0.93295
DKK1	-4.7918	-0.684	-0.42663
TNFSF13B	-4.4686	0.13159	-0.69922
S1PR1	-4.6459	-0.28689	-0.37317
PIK3R5	-4.6367	-0.5419	-0.33095
FOLH1	-4.1812	-0.14921	-0.76694
CNTN1	-3.7333	-0.79254	-1.1484
SNCA	-4.28	-0.26449	-0.43873
CPT2	-5.1803	1.0739	0.4719
PI4KB	-3.0398	-0.5149	-1.664
F10	-4.8366	-0.22857	0.23676
APP	-4.821	0.209	0.22704
PPARA	-4.545	0.19095	-0.0089456
MAP4K3	-3.5142	-0.53358	-0.97752
KCNH5	-4.6699	2.7835	0.24994
CHRNA9	-4.638	2.3116	0.22449
NOTCH2	-4.9458	-0.42724	0.5855
SPHK2	-3.0777	-0.56193	-1.232
ACE2	-4.8276	0.55942	0.54656
NEK2	-3.8819	0.97283	-0.39832
NDUFV3	-5.6354	2.2514	1.4857
CFB	-4.4528	1.4929	0.32967
OPRK1	-4.43	0.6498	0.36034
TACR2	-4.0537	-0.37484	-0.0063784
PIK3R3	-4.5098	1.18	0.45173
CYP51A1	-2.9125	1.3976	-1.1184
KCNV1	-4.106	1.4981	0.12998
ARG2	-3.1371	0.69738	-0.80389
CXCL8	-4.0639	0.099829	0.13895
RAN	-1.9527	0.082918	-1.9315
STAT3	-3.5871	0.35437	-0.23288
MAP2K4	-3.9557	1.2312	0.18228
RNPEP	-4.217	-0.023264	0.45359
BPTF	-1.9851	-0.43528	-1.7773
PRKACA	-3.7321	-0.62089	0.00752
UBA3	-2.2186	3.4008	-1.4987
CYSLTR2	-4.6216	2.4181	0.91093
GNRHR	-4.4982	-0.60183	0.7913
ARG1	-4.0473	-0.66499	0.34172
ADORA3	-5.006	3.1072	1.3084
MC4R	-4.3875	3.7236	0.69926
BRS3	-3.9148	1.6102	0.23242
ATP1A4	-3.3549	0.11986	-0.30811
GRM3	-3.4525	0.046962	-0.18595
MGA	-3.677	-0.27139	0.098062
EGLN3	-3.9035	0.79296	0.34316
EPCAM	-3.621	-1.0257	0.072358
ITPR3	-2.2255	-0.82355	-1.3126
LTB	-2.6331	-0.71668	-0.89634
CTSG	-2.9279	1.5256	-0.59396
ATP1A2	-3.4398	1.2193	-0.078364
HNMT	-3.8504	1.1525	0.33977
IGF1	-3.7809	3.5737	0.28763
PLA2G4A	-4.1965	3.7733	0.73455
OXER1	-3.0259	-0.22794	-0.4221
HTT	-2.637	0.1708	-0.79902
LNPEP	-3.1156	0.6002	-0.28296
MMP1	-3.4895	-0.65786	0.13442
PDE6H	-3.847	-0.19198	0.4932
CHEK2	-4.3736	-0.091484	1.0247
SGK3	-3.0733	1.9587	-0.26327
PSMA6	-2.0527	2.9667	-1.2695
SYK	-2.4873	-0.49125	-0.83271
CASP3	-2.8356	-0.47157	-0.48383
CYP1A1	-3.0084	0.099714	-0.28115
CASP4	-3.7029	-0.2287	0.42522
KCNH7	-3.2456	1.1924	0.01205
CHRM2	-3.0003	-0.037824	-0.2161
EPHB6	-3.2051	0.62097	-0.0040351
HPGD	-4.1307	3.4071	0.92552
IGF1R	-2.4119	0.5917	-0.78383
PRKD1	-2.5804	-0.74448	-0.60923
PSMC3IP	-2.8508	-2.1994	-0.32092
KLKB1	-4.6366	3.2461	1.4811
SELE	-2.7382	1.4536	-0.40836
SSTR5	-3.0833	-0.70712	-0.043475
PDE3A	-3.1925	0.19337	0.10526
METAP1D	-3.3707	-1.8335	0.29979
PSMD13	-3.1627	0.99007	0.10854
P2RY12	-2.5288	1.7128	-0.52314
IL6	-2.955	0.31679	-0.078727
IRAK4	-3.0228	0.20546	0.0024557
IKBKE	-1.6877	-1.3923	-1.3288
SLCO1B3	-2.6159	1.3098	-0.38109
KCNS3	-3.7253	0.93833	0.7451
SLCO1C1	-1.8972	2.5812	-1.059
GABRA3	-2.792	-0.42558	-0.15335
PTEN	-2.0465	-1.3936	-0.88932
PDGFRB	-2.9512	-0.34057	0.016153
SLC10A1	-2.8751	0.57032	-0.046573
RPTOR	-2.2671	-1.3928	-0.64717
GSTP1	-1.8493	-0.21793	-1.0404
ABCG2	-2.3044	-0.376	-0.58189
PTGFR	-2.2576	1.1329	-0.6239
EDNRA	-2.3131	3.0514	-0.5639
GJB6	-2.3929	0.054424	-0.48089
IL6R	-2.2626	0.60027	-0.59957
GC	-2.706	-0.11602	-0.14849
ADAM9	-2.713	1.7089	-0.14057
PSMC5	-2.1843	-1.1733	-0.66585
TYR	-3.0085	1.0729	0.16098
HIPK3	-3.2216	2.1863	0.38321
RAPGEF3	-2.7646	0.13749	-0.054485
RBBP9	-2.9353	0.48381	0.13094
GHRHR	-2.0765	1.0464	-0.721
FGG	-2.5989	1.1834	-0.19369
INPP5A	-4.0015	-0.55467	1.2134
ADAMTS4	-2.0056	-0.38926	-0.77942
CHEK1	-1.5585	-1.0933	-1.2128
PSMA8	-2.8119	-0.32235	0.055185
TUBA4A	-1.4546	-0.30357	-1.2642
IL4R	-2.3688	-1.062	-0.30959
BCAT2	-1.727	0.57177	-0.94994
CTSK	-1.9792	2.0137	-0.69656
MAP3K2	-2.8746	1.8875	0.20274
NUP85	-1.9227	0.13251	-0.73846
FAAH	-2.3049	0.48519	-0.33707
HSP90AB1	-3.6139	0.37099	0.97651
SOD1	-0.26524	-2.0286	-2.0768
ACHE	-1.8679	-1.1763	-0.75361
EIF2AK1	-2.4149	3.7974	-0.20236
CCR3	-1.8856	-0.32035	-0.72334
RPS6KA6	-3.2161	0.64622	0.61174
FLT3	-1.8454	2.6647	-0.75463
MMP17	-2.086	-0.67765	-0.50513
HGF	-2.709	0.66773	0.12604
NR1I3	-3.2523	0.37273	0.68191
ROCK2	-2.6602	5.2409	0.091498
ADCY6	-2.0837	-0.7541	-0.47143
SERPINC1	-2.0315	0.69425	-0.5236
CXCR1	-2.2099	0.51397	-0.3451
LYN	-2.0894	-0.71871	-0.45326
CACNG3	-2.1495	-0.80175	-0.37595
HDAC7	-1.1396	-0.46948	-1.3731
GABRB2	-2.1175	-0.4276	-0.39312
ABCB11	-2.8618	1.7707	0.35532
ADAM17	-4.2648	0.46754	1.7701
LVRN	-1.9905	0.0083367	-0.49323
METAP2	-0.6644	-3.2644	-1.7986
SLC25A4	-1.9884	0.10974	-0.46363
CD200	-1.7967	0.65186	-0.64216
TBXAS1	-1.8548	0.60115	-0.58172
DDB1	-1.4815	-0.10576	-0.94778
CLEC4C	-3.0219	1.6075	0.59357
MAP3K3	-0.16536	-3.1289	-0.99546
CSNK1G3	-3.3308	3.3545	0.90548
PLK4	-2.7081	-0.90464	0.28331
SSTR2	-3.4327	-0.085416	1.017
ICE1	-2.236	2.7211	-0.16245
NDUFA7	-0.73657	-0.36077	-1.6473
CYP2A6	-2.4805	-0.4909	0.10681
CACNG4	-1.1245	-1.0463	-1.2472
MAP3K8	-2.6519	-0.41251	0.28904
LINGO1	-3.3534	2.494	0.99154
KCNH3	-1.4284	0.41144	-0.92869
IL1A	-2.6578	2.7301	0.30208
ALOX5	-2.1639	0.76954	-0.18994
PGC	-1.5137	-0.11606	-0.83952
RPL27A	-0.34442	-1.5469	-2.0006
NDUFB11	0.2725	-2.2737	0.016832
UCHL3	-1.4589	1.9632	-0.88202
PIK3CB	-2.4417	-0.76371	0.10082
BCL2L1	-0.28296	-1.7162	0.055891
MAPK8	-2.9609	1.4741	0.62477
EIF2AK2	-1.6625	-0.74613	-0.6659
APH1A	-1.7981	-0.56962	-0.52328
RRM2B	-2.53	-1.1204	0.21138
TPP2	-2.5058	0.28408	0.19214
FLT4	-1.4461	0.141	-0.86091
GZMB	-0.8148	1.1469	-1.4805
NTRK3	-2.8918	-0.095776	0.59933
GAA	-1.8654	0.064396	-0.41695
PLA2G7	-2.8957	0.72274	0.62385
BCR	-1.5608	0.30706	-0.68988
PGR	-2.8771	-0.76999	0.62733
GPD2	-2.6938	0.11258	0.44541
HTR2A	-1.9883	0.34224	-0.25117
PARP2	-2.4173	0.44653	0.18042
F8	-2.1414	0.22948	-0.080872
SLK	-2.7466	-0.096437	0.52958
CHRNE	-1.8733	-0.78168	-0.33353
CRHR2	-2.2575	-0.77317	0.054905
CASP8	-2.8115	0.13748	0.61936
UPF1	-1.7288	1.6102	-0.46241
TACR1	-1.8349	4.3656	-0.33383
SLC6A19	-1.5046	2.335	-0.65441
SPC24	-2.2156	-1.2088	0.063012
MRPL45	0.29673	-2.2921	-1.0156
SLC6A12	-3.1258	-0.206	0.97821
IL17A	-2.5697	0.17775	0.42258
PDE7A	-1.8569	0.19513	-0.28263
SCN8A	-2.8148	-0.67517	0.6754
PNP	-2.5241	0.44446	0.3893
SIK3	-1.812	-0.39163	-0.31782
CPB1	-1.6003	-0.059061	-0.52831
CRHR1	-1.5265	0.051524	-0.60072
KDM5A	-1.9787	-0.39345	-0.14702
CHUK	-3.155	0.84248	1.0532
SLC10A2	-1.9826	1.3198	-0.113
OPRD1	-2.6081	0.23556	0.51619
KCNQ1	-2.5174	0.41309	0.42901
MAP2K3	-2.0325	-0.78608	-0.054086
AURKA	-0.74973	-0.83498	-1.3263
EPHA7	-2.9387	-0.23974	0.8719
PSMB9	-2.4319	-1.9614	0.3742
ATAD2B	-1.6242	0.33451	-0.42785
NDUFS3	-0.967	-0.3737	-1.0734
NOD2	-2.3823	1.7234	0.34204
EPHA1	-1.661	-0.5706	-0.37709
RAB27A	-3.475	2.6198	1.4496
CBR1	-3.0563	4.0147	1.0333
CYP4F2	-2.1503	2.5089	0.14391
CDK17	-3.492	3.6578	1.5016
IDH1	-3.4281	-1.0578	1.4392
TXK	-2.629	2.4235	0.65085
VAMP2	-1.2884	0.12755	-0.68577
SLC6A3	-2.3582	-0.32422	0.39248
LAP3	-2.1249	-0.14466	0.16147
PRKCQ	-2.3739	-0.14355	0.41309
SLC22A8	-1.6325	-0.38136	-0.32068
BLK	-2.0765	-1.62	0.12695
KCNA7	-1.7463	-0.49799	-0.20198
SCNN1B	-0.35081	-1.6391	-0.062871
SMARCA4	-0.17556	-1.4267	-2.4509
CDKL1	-1.6828	0.14681	-0.24968
PDE3B	-1.2729	-0.66132	-0.65859
TACR3	-1.7061	0.15262	-0.22294
THRA	-1.7157	-0.46858	-0.20286
NR1D2	-1.3821	1.5059	-0.5364
RARG	-0.81086	-2.2668	-1.1004
CYP2C19	-2.194	1.3013	0.28989
TNIK	-1.4164	0.46524	-0.47988
MAPKAPK5	-1.5021	0.74226	-0.3915
HTR1F	-1.9254	1.336	0.032039
P2RY14	-1.0176	0.33775	-0.87526
FBP1	-1.9631	0.29931	0.07278
FABP4	-2.4039	0.83275	0.51958
GABRA1	-1.6858	1.9414	-0.18667
C7	-1.1515	2.399	-0.71336
MAP3K1	-1.6802	-1.5063	-0.16614
VEGFA	-1.7509	-0.11437	-0.092572
CYP2D6	-1.8619	-0.46741	0.019823
ULK1	-2.0556	-0.018094	0.21989
IGBP1	-1.2989	0.39892	-0.50342
GRM5	-1.763	0.81019	-0.03846
RAMP3	-1.2355	-1.3078	-0.56435
ABCC2	-1.5101	-0.31423	-0.28725
CHRNA7	-2.2797	1.6391	0.48518
ITGAM	-0.8984	-0.63794	-0.89036
CACNB2	-2.0054	3.1147	0.21811
SPTLC3	-2.1604	1.0783	0.37361
LIPF	-2.1833	0.89952	0.39815
SUCNR1	-2.555	1.8086	0.77832
PSMD10	-1.6081	-0.51753	-0.1671
C6	-1.2519	0.88079	-0.52194
PSMA2	-1.4171	-0.20077	-0.35282
MAPK7	-1.5724	0.079998	-0.19206
P2RY1	-2.0426	-0.038818	0.28953
PRLHR	-1.5046	-0.60803	-0.24527
GRIN2B	-1.8098	-0.90941	0.069962
SHQ1	-1.5044	-1.2635	-0.23123
BMX	-1.1302	1.4598	-0.60111
KCNH6	-0.54484	0.40693	-1.1855
XPNPEP1	-0.69911	0.032108	-1.0237
PLA2G2A	-2.9155	-0.10972	1.193
MTOR	-0.58782	1.8482	-1.1297
NEK1	-1.1767	1.7196	-0.52838
CA14	-1.1162	-0.79744	-0.58585
BRAF	-2.8941	4.0137	1.1946
AQP8	-1.8969	-0.50125	0.19824
SCN10A	-2.9695	2.5526	1.2722
CA5B	-1.8007	1.9904	0.1129
AMH	-1.8751	-0.20812	0.18967
GDF2	-1.1969	-0.72532	-0.487
BMPR1A	-2.0313	-0.62038	0.35093
GRIK3	-2.1333	0.22836	0.4594
PDGFRA	-2.5799	3.5122	0.90755
KDM4C	-1.4847	-0.42418	-0.1833
KIT	-1.7394	-0.059601	0.07269
CDK2	-0.7561	0.43186	-0.90996
IL4	-0.8234	-1.318	-0.83523
SCN9A	-1.3075	-0.85338	-0.34893
PSEN2	-1.02	-0.35816	-0.63085
TRPA1	-1.7348	2.3047	0.086906
FPR3	-2.1479	-0.45437	0.50792
DHFR	1.0517	-2.9076	-1.9758
TESK2	-2.345	2.161	0.70914
FGFR1	-1.694	0.30775	0.058915
GART	0.42463	-2.2651	-0.35676
HMOX1	-1.3102	1.5149	-0.31253
CYP19A1	-0.79652	0.72063	-0.81935
HNRNPK	-0.79573	-2.6215	-0.81115
SLC12A6	-2.0028	1.7095	0.41732
NDUFA4L2	-0.64723	0.32774	-0.9351
GCK	-0.80079	-0.062813	-0.77819
NEK11	-1.2451	0.2251	-0.33189
ALDH5A1	-1.7877	3.1227	0.21235
CD80	-1.4672	-0.06474	-0.10236
ABCB4	-0.81936	-0.2467	-0.74109
MAP3K10	-1.7592	-0.33407	0.20066
SPR	-0.82544	0.088404	-0.73071
ABCC5	-1.0828	1.0889	-0.47018
ANXA3	-2.1304	0.41032	0.57828
SGK2	-0.91711	-1.5175	-0.62256
OXSR1	-1.4928	0.13688	-0.02966
DEGS1	-1.1344	0.90336	-0.37375
CYP2J2	-1.5381	0.74567	0.043334
KCNA6	-1.9179	-0.14414	0.42337
KCNN4	-0.91784	-0.23601	-0.57629
PSMC4	-1.2993	-1.0193	-0.1921
SLC6A1	-1.1161	2.6289	-0.37114
JUN	-1.5285	0.37777	0.043877
PPWD1	-2.3741	-0.28321	0.89669
SLC36A1	-0.75629	-0.51287	-0.71321
NPY5R	-1.4973	2.5844	0.030643
GSK3A	-1.038	0.12915	-0.42684
KCNB2	-1.5125	0.083025	0.050363
PRSS3	-1.2552	0.17948	-0.2059
MARK3	-1.8753	-0.13748	0.41754
CD4	-1.3798	1.5741	-0.07745
ANXA5	-1.2892	-0.57226	-0.16652
HCFC1	-1.4104	-0.53965	-0.034318
NCSTN	-0.86024	-0.88841	-0.58022
NRP1	-2.7408	0.081331	1.3037
ITGA2	-1.4326	0.3519	0.00083298
SLC5A1	-1.2164	1.4387	-0.21513
BDKRB1	-1.3723	-0.20553	-0.054625
ADA	-0.59152	0.23178	-0.83189
BMPR2	-2.032	2.5565	0.61008
CDK5	-0.16512	-1.655	-0.028053
MIP	-0.78787	-0.44185	-0.6333
SBK3	-0.99101	-0.50124	-0.42998
CXCR3	-1.3113	-0.24615	-0.1084
JAK2	-2.1324	0.31302	0.72005
HSD3B2	-1.1861	1.6332	-0.22404
CACNA1I	-1.1503	-0.42381	-0.25456
SLC27A1	-0.82017	-0.16091	-0.57821
GIPR	-0.12989	-1.6696	-0.020203
NCOA1	-2.0108	0.11851	0.62376
NOD1	-1.3431	0.71673	-0.043799
TGFB3	-0.72919	0.35345	-0.65321
CSNK1G1	-1.3435	-0.64066	-0.030382
PCSK6	-0.72523	-0.3907	-0.6486
SLC47A1	-1.1549	0.17816	-0.20881
CPB2	0.083387	-1.8059	0.93574
ATP4A	-1.3944	2.1244	0.043578
ABCC8	-1.3006	-1.121	-0.048462
RYR3	-2.075	1.9265	0.7265
OPRM1	-2.5326	0.017497	1.1853
ADH1C	-1.946	0.74274	0.59947
PSME4	-1.2838	3.4155	-0.060111
FGF1	-0.8472	-0.28579	-0.49053
KCNC2	-1.464	0.23228	0.13122
LTA	-2.0171	0.030809	0.68527
STK32B	-1.2626	1.5728	-0.062219
PKN3	-0.5085	-0.60412	-0.81472
KLK4	-1.0975	-0.4473	-0.22528
NPC1L1	-0.59789	1.3653	-0.72059
FYN	-0.36029	-1.2698	0.35691
TUBB6	0.16092	-1.7905	-0.27046
PDGFC	-2.204	0.46471	0.9085
PRTN3	-0.79696	2.7908	-0.49319
GLS	-1.0964	-1.0561	-0.19287
MDM2	-0.53241	0.23133	-0.75624
AR	-1.1318	-0.035627	-0.15445
ERAP2	-1.7524	0.69662	0.46738
METAP1	0.43252	-2.056	-0.62331
PRKCH	-2.3967	1.5276	1.1179
ITPR2	-1.1824	0.036929	-0.094669
STK33	-0.94877	3.3906	-0.3189
RET	-1.1775	-0.69468	-0.089977
PTPRF	-1.9494	-0.56172	0.68849
ENPP2	-1.2511	-0.74987	-0.0062919
DAPK1	-1.1077	-0.1526	-0.14861
SENP8	-0.65342	0.59779	-0.60175
KCNK13	-1.0531	2.3022	-0.19875
P2RY10	-0.76737	0.46784	-0.47915
IL9	-2.0015	-0.30003	0.75709
ADAMTS5	-1.2528	-0.011971	0.0088872
MVK	0.011004	-2.588	-1.6417
SCN1A	-1.8366	4.0251	0.59907
NDUFV2	-2.6754	-0.016623	1.4427
CTSD	-1.1022	-0.73063	-0.12895
CNGA3	-0.087901	-1.5346	-1.2998
RXFP4	-2.2186	0.81498	0.99615
NPEPPS	-0.9042	-0.95062	-0.31657
KMO	-0.11078	-1.4177	0.41181
HTR2B	-1.6495	-0.53522	0.43901
HCN4	-1.6595	-0.63885	0.44941
IL1R2	0.5654	-2.0733	-0.52018
ANO1	-1.1467	1.0354	-0.060471
RARB	-0.89189	0.71255	-0.31138
EP300	-1.1763	1.1947	-0.026619
PRKD3	-0.79925	0.16475	-0.40095
KCNJ2	-1.0267	0.90583	-0.1563
SRMS	-1.1189	0.62766	-0.063499
CYP27A1	-0.38275	-1.1079	0.52524
CD52	-1.2272	-0.46567	0.049336
NDUFA6	2.2577	-3.7287	-3.568
ACE	-1.4421	-1.6128	0.27924
KCNA10	-0.086683	-1.3708	-0.089165
MLKL	0.3386	-1.7391	-0.33752
CA5A	-0.35911	-0.99716	-0.95008
CYP11B1	-0.22483	-1.1663	0.26307
AKT3	-2.5666	1.1563	1.4242
DRD1	-2.5708	-0.62187	1.4309
PTH2R	-0.27895	-1.1046	-0.21253
GRM8	-1.6175	1.4875	0.47928
PLK3	-1.7181	0.69124	0.58172
FASN	-1.5621	-0.73161	0.42713
SLC12A3	0.13151	-1.5137	0.11734
EIF2AK4	-0.78369	-0.50008	-0.34854
GLRB	-0.44062	-0.92732	0.36688
IL2RB	-1.5162	-0.24988	0.39025
AQP5	-0.6894	0.45776	-0.4354
RPL11	-0.33863	-0.68616	-1.2979
CACNA1C	-1.4516	-0.51064	0.33141
AXL	-0.59227	-0.3534	-0.5271
ALOX12	-1.0552	4.6258	-0.055987
C5	-0.38085	-0.94938	0.75878
SELL	-1.197	2.2634	0.098854
HTR3D	-0.27425	-1.0051	0.10682
NPR2	-1.5964	2.1938	0.5091
HEATR1	0.4957	-1.7657	1.4065
HPGDS	-1.1937	0.22728	0.10977
PSMB7	1.1855	-2.4455	-1.446
GP2	-0.62001	0.298	-0.45587
KEAP1	-1.6907	0.30585	0.61495
STK10	-0.61945	-0.91809	-0.45595
HRH1	-1.6157	2.5734	0.54671
PPIA	-0.75326	0.52165	-0.31347
PTGER3	-0.51085	0.25255	-0.55577
KLK1	-0.17367	-1.0842	0.39339
EGLN2	-1.7958	0.34642	0.73257
ALPL	-0.55466	-0.02678	-0.50263
AOX1	-1.2172	3.9335	0.16033
GALR3	-0.38243	-0.86365	-0.30351
TNK1	-0.045243	-1.1826	-0.026934
DDR2	-1.7075	1.4881	0.65822
PAK1	-0.60811	-0.1246	-0.42708
SRD5A3	-0.40118	-0.81745	0.32906
CCL11	-0.90579	1.0407	-0.11488
BAZ2B	-1.3716	0.089832	0.35155
CCR8	-0.54061	-0.35366	-0.47821
DYRK1B	-1.825	0.5148	0.80857
KCNV2	-1.0831	-0.19135	0.070888
CASP6	-1.1721	2.2398	0.16094
SMO	-0.84989	0.95049	-0.15867
PSMD2	-1.2363	-0.82896	0.23241
NDUFB7	1.0728	-2.4645	-2.2821
GJD3	-0.84346	-0.25076	-0.1588
SCN5A	-1.8309	0.39666	0.83067
HTR3C	-0.46459	-0.72798	-0.12837
BUB1	-1.3769	0.0363	0.39467
PKN1	-0.51942	0.44748	-0.46188
HDC	-0.70176	-0.50426	-0.27033
GABRR2	-0.75722	3.0088	-0.21422
TOP1MT	-1.1079	-0.23599	0.13972
C5AR1	-0.37769	-0.81186	0.48113
ACVRL1	-0.32086	-0.86345	0.20257
GRK6	-0.62991	0.22095	-0.33199
CSK	-0.91033	-0.65957	-0.047695
RPL18A	-0.82342	-0.81131	-0.13378
KCNQ5	-0.62586	2.2069	-0.32821
PDE1B	0.15649	-1.3246	0.014391
MMP16	-0.95863	0.37701	0.012112
KCNK3	-0.39282	-0.77193	-0.4266
MTTP	-1.7441	-0.28003	0.80245
PIK3CD	-1.0092	0.9158	0.069313
CD28	-1.3576	-0.38773	0.41973
AMY2A	-1.3681	0.81318	0.43038
ITK	-1.0152	0.52605	0.083393
C21orf33	-0.14928	-1.0111	-0.17284
NPY2R	-0.75822	3.9821	-0.16618
CCND1	1.1062	-2.2654	-1.2241
ATP6V1A	0.84506	-2.0002	0.33057
CH25H	-0.94859	3.7019	0.028363
ERBB2	-0.24845	-0.90516	-0.36267
FURIN	-0.28377	-0.85963	-0.41668
ST14	-1.2303	0.80528	0.32165
PLAT	-0.98459	1.0539	0.081799
NOS2	-0.54574	-0.3882	-0.34998
FSHR	-2.1813	0.72766	1.2873
CACNB3	-1.279	-1.1791	0.40502
STK3	-0.44299	-0.69735	1.6029
CACNB4	-0.66659	-0.56383	-0.20437
ROCK1	-1.155	2.5004	0.28417
RAPGEF4	-0.89498	-0.63026	0.037021
PSMB2	0.83405	-1.9722	0.046079
ENPEP	0.085426	-1.2192	0.55069
CHRNB1	-0.93559	-0.75003	0.081158
KCNC3	-0.63835	-0.46217	-0.21304
IDI1	0.49788	-1.6219	0.00085243
NLRP3	-2.6131	0.074412	1.7674
USP1	-0.85465	1.6115	0.011282
CSRP2	-1.5725	0.86593	0.7303
SLC9A5	0.2508	-1.3598	-0.75493
TIE1	-0.55605	-0.63222	-0.28429
VWF	-0.35793	-0.84516	-0.78087
NOL9	-1.1418	-0.0094659	0.308
HIF1A	-0.36063	-0.74056	0.054362
LTC4S	0.78832	-1.8889	-1.1012
MAP3K6	-0.65466	0.10128	-0.17505
CDKN3	0.59742	-1.697	-0.11312
PRKCA	-0.43062	-0.66012	-0.74804
HDAC2	0.15612	-1.2456	1.1118
EZH2	-0.72768	0.30448	-0.089173
AGTR2	-1.3388	-0.83483	0.52507
AKR1C3	-0.23181	-0.8465	0.89718
PSMA7	1.3991	-2.4555	-2.317
GJB3	-0.16218	-0.89395	0.43781
HCRTR2	-0.5046	-0.31121	-0.29247
SLC5A7	-0.89473	0.3331	0.099191
SRPK2	-0.24867	-0.80109	0.42051
DLX3	-1.0037	0.099084	0.21274
PDE1C	-1.279	0.022754	0.49012
TMPRSS11D	-1.3952	0.61492	0.60636
TGFB2	-0.57387	0.89419	-0.21334
RBX1	0.50202	-1.5474	-1.2216
NDUFAF4	-0.27863	-0.75052	-0.68395
SMYD2	-0.93264	-0.72083	0.14875
PANX1	-0.078908	-0.94675	0.69033
HPSE	-0.3642	-0.73757	-0.68804
SERPINF1	-0.8551	0.84152	0.080292
SLAMF7	-1.4193	-0.19464	0.64534
CBS	-1.457	-0.33665	0.68324
STK36	0.27366	-1.298	-0.79609
IKBKB	-1.7735	-0.60747	1.0062
BRSK2	-0.99841	3.4488	0.2312
QPCT	-0.90723	-0.052986	0.14201
ITGB1	-0.62209	0.31848	-0.14209
DMPK	-0.13147	-0.87967	0.29088
ADAM10	-0.27135	-0.72767	1.1734
HSPA5	-1.2572	-2.0224	0.49661
ATR	-0.34694	-0.65073	0.29704
LPAR5	-1.2925	-0.3317	0.53606
NOTCH3	-0.28919	-0.70748	-0.28143
CLU	-1.0868	0.74038	0.33435
CD3E	-0.91325	1.2055	0.16833
SLC32A1	-0.068068	-0.92711	0.11312
FPR1	0.29022	-1.2724	0.36268
AVPR2	-0.91916	-0.18533	0.18079
CDK9	0.54596	-1.5271	-0.77434
SGMS2	-0.51732	0.48018	-0.21821
MGLL	-0.72908	1.5107	-0.0059688
HSPB1	-0.56332	0.30008	-0.16558
SLC5A11	0.09561	-1.0766	0.78996
CXCL10	-0.56179	1.1198	-0.16402
PREP	-0.87752	1.467	0.15225
KCNH1	-1.5441	-0.020757	0.81894
CXCR4	-0.30752	-0.67134	-0.77382
MCHR2	-1.5286	1.0078	0.80569
ADORA1	0.013523	-0.99023	-0.86382
PTK6	-0.020418	-0.94919	-0.75027
XDH	-0.50918	0.85698	-0.20861
GIF	-0.84818	1.987	0.13211
PDE4D	-0.33959	-0.60781	0.60203
PIM1	-1.2527	-0.17534	0.54262
GSK3B	-1.8648	2.5324	1.1573
LTK	-0.38618	-0.55885	-0.078309
CSNK1D	0.26987	-1.2142	-0.63409
ADCYAP1R1	-0.69647	-0.1343	-0.0029918
PIK3C3	-0.94654	-1.1808	0.24732
CACNA2D1	-0.59114	2.5298	-0.10497
NDUFA12	-1.3224	-1.323	0.62959
S1PR2	-0.71785	-0.42907	0.025677
BRD2	0.11963	-1.044	0.29251
NPEPL1	-0.58866	-0.53357	-0.098587
MAP3K19	-1.3719	1.4363	0.68595
ADCY5	0.70943	-1.6284	-0.62477
PSMB1	-0.10823	-0.80749	0.61722
INSR	0.078746	-0.98768	0.7518
CSNK1A1	-0.72485	3.318	0.042611
ITGAL	-0.29762	-0.60325	-2.0392
CMA1	-0.88809	-1.0051	0.20643
POLR2C	0.37314	-1.273	-1.5418
RIPK2	-0.67711	0.0017441	-0.001058
CTH	-0.64401	1.9553	-0.033304
SUV39H1	-1.468	-0.067392	0.79518
FGFR4	-0.58107	0.73444	-0.087891
NUAK1	-1.4631	0.21845	0.79649
PMVK	1.3792	-2.2788	-2.606
KDM5C	-0.89316	0.048422	0.22952
TYMP	-0.63624	-0.87045	-0.025513
KCNH2	0.029081	-0.92115	-0.7899
PRKCB	-1.0709	0.88935	0.41452
TPH1	0.1049	-0.98554	-0.19159
GRIA2	-1.4019	0.38451	0.75251
S1PR3	0.38111	-1.2555	-0.10685
TLR7	-1.6617	0.57251	1.0155
GRM2	0.17717	-1.051	0.4824
BCL2	-1.1819	0.29013	0.53943
MARK1	-0.31236	-0.55948	-0.25945
RFC4	0.54077	-1.4076	0.0073145
SCN2A	-0.59774	-0.12714	-0.042506
CACNG1	-1.249	0.27752	0.60984
PRKCE	-0.62807	-0.3809	-0.0096962
CSE1L	0.59549	-1.4537	-0.047541
ESR2	-1.3397	-0.31717	0.70598
PDE10A	-0.95167	2.2481	0.31796
P2RX3	-0.72155	-1.5002	0.089925
MADCAM1	0.32401	-1.1804	-0.086466
ABL1	0.3096	-1.1634	-0.92849
ENG	-1.2633	-0.13745	0.64166
PSEN1	-0.96777	2.0214	0.34617
GJA4	-1.2106	1.2658	0.59164
IL6ST	-0.37936	-0.45942	-0.47797
EGFL7	-0.1189	-0.71855	-0.94689
CFD	0.052672	-0.87476	0.76387
FLT1	-1.5095	1.1202	0.89702
OPRL1	0.43948	-1.2525	-0.13882
SERPINA3	-0.17756	-0.6291	-0.76478
TUBA1B	1.4371	-2.2412	-1.1721
TGFB1	-0.93621	0.28279	0.32916
PAK2	-0.25958	-0.54329	-0.51711
LPAR4	-0.53639	4.565	-0.067191
TNFRSF4	-0.79152	0.66206	0.18829
KCND1	-0.69698	1.3483	0.0988
KCND3	0.96865	-1.7694	0.076981
DDAH1	-0.11506	-0.67737	0.084634
CASP9	-0.85651	0.522	0.26115
ALAD	0.44892	-1.2366	-0.28552
NR1H2	1.0606	-1.839	0.33047
CFTR	-0.10888	-0.65099	-0.27878
SCN7A	-0.17931	-0.57683	-0.46117
TUBA3E	-0.65916	-0.78682	0.078471
STK16	0.38069	-1.1287	0.015474
PTGS2	-1.6956	-1.0445	1.1165
MUSK	-1.3499	0.38515	0.77108
CHRM1	-0.26874	-0.47743	-0.23954
BRD4	-0.1591	-0.5843	0.72903
CACNA1S	0.23384	-0.97626	-1.0194
MAP3K5	-0.95807	-0.18934	0.38439
DCLK3	-0.75573	0.13157	0.18299
BDKRB2	-0.34106	-0.39648	0.11156
IMPDH1	0.67595	-1.4066	-0.33623
KCNJ12	-0.041197	-0.68592	-0.4841
GALR2	-0.80621	0.067826	0.24988
VPS25	1.3699	-2.097	-2.0533
KLK14	-0.19202	-0.53473	0.83102
BACE1	-0.11441	-0.60738	0.82377
MS4A1	-1.141	2.2996	0.59457
INPPL1	-0.53632	-0.11396	-0.0073669
UCHL1	-0.61442	-1.0394	0.071059
MLNR	-0.12138	-0.59729	0.37204
AKR1B1	-0.83973	-0.98885	0.29885
PTPRM	-0.88235	2.448	0.34358
TBXA2R	-0.60205	1.0582	0.068007
ATP4B	-1.4553	0.4601	0.92455
RHD	-0.4068	-0.30707	-0.34627
RORC	-0.35376	-0.3553	-0.243
MMP3	-0.70192	2.5261	0.17394
ENTPD1	-0.51911	3.4177	-0.0067956
CASP1	-0.88282	0.37203	0.35738
CHRNA4	0.20359	-0.91071	0.14494
PIM3	-0.25793	-0.4491	0.71881
VIPR2	-0.70131	-1.1622	0.18054
RPS6KA1	-0.37263	-0.33083	0.68768
NPY1R	-0.45378	-0.24344	0.57446
LPAR3	-0.59005	0.067931	0.079577
ADORA2A	-0.9591	1.0854	0.44954
FRK	-1.679	-0.40644	1.1697
CDK6	0.25116	-0.93712	0.38651
CA1	-0.99185	0.92673	0.48444
IFNAR2	-0.35465	-0.33105	0.0082605
CACNA1G	-0.49418	-0.19038	-0.63761
SIRT5	-0.2441	-0.43928	-0.23806
ERN1	0.9125	-1.5926	-0.11394
EPHA10	-1.1529	1.1398	0.65248
ERBB3	-0.50492	-0.1116	0.0075117
NDUFC2	-1.0841	-0.0027589	0.58729
CHRNA5	-1.0691	0.10332	0.57416
VEGFB	0.25403	-0.9301	-0.21483
CELA1	0.24109	-0.91587	-0.54619
SIK1	-1.1825	2.1886	0.69176
HRH2	-0.12391	-0.54385	0.34774
CD40LG	0.50723	-1.1742	-0.33134
PRMT7	0.80103	-1.4646	-0.4337
KAT2B	-0.68681	-1.17	0.20637
CNR1	-0.65002	0.0073876	0.17046
ALOX5AP	-0.035889	-0.62524	-0.3311
CTGF	-0.90513	-0.74139	0.42809
CDC42BPA	-1.7513	1.942	1.2743
MAP3K7	-0.17835	-0.48118	0.68235
BRD3	-0.43328	-0.22617	0.1431
HDAC8	-0.80165	1.7673	0.33425
PDE2A	0.32454	-0.96632	-0.93048
SRC	-0.42638	-0.21159	0.017321
CSF1R	-0.62214	1.336	0.15984
MAS1	-0.85174	3.186	0.39018
SMG1	1.3152	-1.9528	-0.37928
NDUFB1	-0.51107	-1.1946	0.052893
XPNPEP2	-0.71695	-0.24552	0.25912
CDK13	0.45693	-1.0944	0.37836
GBA	0.26618	-0.90278	-0.068907
GAK	0.11338	-0.74946	-0.62528
LCK	-0.092346	-0.53996	0.19309
CACNG2	-0.7684	0.16032	0.32741
POLD1	0.90705	-1.5373	-0.35456
CTSO	-1.6916	-0.52428	1.2551
PSMD7	1.6559	-2.2856	-1.0456
VARS	1.7028	-2.3318	-1.1302
TLR4	-0.21537	-0.41333	0.19874
PRKACB	-0.98598	-0.090289	0.56739
U2AF2	0.41016	-1.0382	-1.4036
RPL4	0.74838	-1.3753	0.082106
CTSC	0.17379	-0.79822	-0.21398
PTPMT1	0.45827	-1.0773	-0.87803
FGFR2	-0.34559	-0.26818	0.15684
IL23A	0.40044	-1.0071	-0.31084
PSMB8	-0.84845	1.2367	0.44372
NDUFB9	0.38858	-0.9944	-0.35072
CYP2E1	-0.71267	-0.44257	0.3189
HRH4	0.11809	-0.72183	-0.30067
LIMK1	-0.65862	-0.75656	0.26809
ADAM33	-0.16549	-0.43197	0.76791
KCND2	-0.029069	-0.56202	-0.2237
ITGB2	-0.083984	-0.49669	-0.57516
CD38	-0.0062859	-0.56997	0.036461
KLK2	-0.0043474	-0.57015	-0.34287
POLE	2.4211	-2.994	-1.7743
MGAM	0.10573	-0.67357	-0.37614
MAPK13	0.12416	-0.68896	-1.2835
PDRG1	0.25907	-0.82037	-0.18734
RFC3	0.12536	-0.68499	-0.11904
CD40	0.03242	-0.58849	-0.24643
CSNK1E	0.61841	-1.1734	0.19611
ATAD2	-0.18202	-0.36967	-0.77113
IL5	-0.72349	-0.81238	0.3528
GRIN2D	0.59835	-1.1497	-0.40523
SLC1A7	-0.33885	-0.20767	-0.2037
MLST8	1.0575	-1.5927	-1.1626
SGPL1	-0.45489	-0.053569	0.12365
EEF2	0.54625	-1.0544	-0.60162
CD248	-0.10786	-0.39607	-0.9778
CASR	-1.2617	-0.17279	0.90202
DYRK4	-0.53559	0.24582	0.17656
CYP3A5	-0.68088	-0.53536	0.32429
NTRK2	-0.4769	-0.026926	-0.64752
MRPL34	1.3831	-1.8815	0.8872
HSP90AA1	-0.12392	-0.37204	0.45414
NDUFA8	-0.83472	-0.6552	0.47996
MPI	-0.075288	-0.41828	-0.42799
CASP5	-0.52649	0.36632	0.17245
ACACB	0.71304	-1.2063	0.061962
MAP2K6	0.039732	-0.52904	-0.23532
HPD	-0.088675	-0.39907	0.2449
SLC29A1	-0.25466	-0.23265	1.108
MAOB	0.36237	-0.84918	-0.7438
MAP2K7	-0.87854	0.031143	0.53571
SCN11A	-0.52529	0.86801	0.18685
PAK3	0.30759	-0.79347	-0.14571
NDUFC1	2.595	-3.0801	-2.022
RAD51	1.0773	-1.5612	0.081138
CHRNA1	-0.34867	-0.13443	0.63179
ANGPT2	-1.2702	0.094991	0.93631
COMT	-0.45181	-0.022618	0.077401
SRPK3	-0.50206	-0.13388	0.16948
BIRC7	0.55697	-1.028	-0.94077
NDUFB8	0.11385	-0.57467	0.26363
HTR4	-0.17091	-0.2896	1.58
PDE8A	-0.25526	-0.20239	0.052201
VDR	-0.41365	-0.042086	-0.32401
CPM	-1.4196	0.043867	1.0974
NUCB1	-0.10356	-0.34326	1.0827
MAPK10	-0.8431	1.82	0.52201
CYP2C9	-0.73323	0.78931	0.41442
SLC1A3	0.18592	-0.62974	1.2154
NEK6	-0.14771	-0.29594	0.3471
FFAR2	0.60635	-1.0479	-0.018182
HDAC9	-0.22982	-0.2101	0.17687
MMP7	0.081138	-0.52059	-0.4494
ISG15	0.3992	-0.83787	0.18123
SCTR	0.58431	-1.0188	-0.21924
P2RX1	0.31751	-0.74989	-0.13218
PSENEN	0.4405	-0.86884	-0.76879
DRD2	-0.19148	-0.23097	0.47517
PRKCI	0.12143	-0.53649	0.30966
CTRC	-0.36802	-0.046507	-0.017023
BCL2L10	0.044153	-0.45519	-0.68559
GRIA4	-0.19189	-0.21501	0.84746
AVPR1B	-0.95545	-0.80912	0.67197
SLC12A7	0.62083	-1.0265	-0.45444
HDAC3	0.43036	-0.83117	-1.1539
PLAU	-0.28401	-0.11676	-0.93112
PCSK5	-0.57332	-0.25433	0.293
HDAC6	-1.2793	1.0611	0.99945
LIPG	-0.84056	-1.0943	0.56128
CHRND	-0.54427	0.41372	0.26503
QRFPR	-0.7224	1.0132	0.44969
PIK3C2A	-0.00062789	-0.39893	-0.33542
DYRK3	-1.4276	-0.14221	1.1567
ATP6AP1	0.5689	-0.96829	-1.9207
SLC8A3	0.37122	-0.76985	0.5861
MST1R	-0.41835	0.020385	-0.23324
FES	-0.33309	-0.06125	0.40657
CTLA4	-0.95658	-0.010987	0.69154
IL17RA	-0.26275	-0.13052	0.26879
GRM4	0.35822	-0.75141	0.087359
LIMK2	-1.207	-0.10657	0.94774
SLC12A4	-0.77458	2.486	0.51794
CDKL2	-1.141	0.74229	0.88643
TEP1	-0.32057	-0.06527	-0.087723
CALCA	-0.34783	-0.037042	0.031599
ABL2	0.47738	-0.86005	-1.4441
NRF1	-1.1383	0.25177	0.89141
CYP17A1	-0.69064	-0.11294	0.44691
SIGMAR1	-0.60955	0.74774	0.36606
KDM7A	-0.73376	0.74459	0.49046
PLA2G2E	0.69073	-1.0687	0.67568
IFNG	0.23258	-0.61024	-0.15747
VEGFC	-0.49869	0.12288	-0.32326
EEF2K	-0.12974	-0.2452	-0.084747
CHRNB4	0.038772	-0.41319	-0.32734
CSNK2A1	0.8661	-1.2353	1.2124
PYGB	0.4269	-0.78897	-0.07698
WNK2	0.20035	-0.56138	1.0953
PSME2	0.29598	-0.65253	-1.038
CCKBR	0.17005	-0.52366	0.50078
NOS1	-0.13233	-0.21934	-0.7097
PSMC1	-0.23315	-0.11821	-0.027459
PDCD1	-0.21945	-0.12663	0.46485
F5	0.78492	-1.13	0.62653
GJB4	0.0084568	-0.3517	0.48719
P2RX7	0.10567	-0.44711	0.16545
KCNN1	-0.10605	-0.23312	-0.27821
GNG7	-1.2158	0.88067	1.0046
F2RL3	-0.30995	-0.026839	0.42407
F7	-0.36098	0.029465	0.63328
GABRR3	0.90623	-1.2377	-0.20753
ERBB4	0.12042	-0.45165	0.68905
CYP24A1	1.4436	-1.7708	-1.2792
GSR	-0.82139	1.1978	0.6205
ESRRB	0.50682	-0.83391	-0.069034
ATM	0.19157	-0.5141	0.91002
PLK2	-0.069642	-0.24921	-0.42345
ADGRG3	-0.67763	-0.86367	0.48555
TUBB3	0.61077	-0.92705	-1.0579
PDE4C	-0.63055	-0.29246	0.44021
YARS	1.4634	-1.7772	-0.61695
PIK3R2	-0.10953	-0.20301	0.12565
ADAM8	0.47744	-0.78917	0.029678
SLC17A9	0.69036	-0.99915	0.23076
SLC12A1	-0.3958	0.088864	0.49947
PDE7B	-0.89206	-0.42996	0.70566
CYP2C8	-0.97138	0.14175	0.78508
SLC22A1	0.30301	-0.60769	0.028534
PRPF6	0.89134	-1.196	-1.6997
TUBA3D	0.49874	-0.80061	0.020905
KLK7	-0.1621	-0.13704	0.33706
CA12	0.5219	-0.81936	0.20503
DPP7	0.22312	-0.51952	-0.26662
KCNB1	-1.4954	-0.55698	1.3247
SIRT6	0.01935	-0.31384	-0.36997
PTPRS	-0.65435	-0.62707	0.48752
GJA8	1.0874	-1.3792	-0.044703
SLC19A1	-0.74557	-0.8946	0.58514
DDC	-0.41097	0.11938	0.14021
PAK6	-1.4354	0.53221	1.2767
HIPK2	-1.2716	-0.32331	1.114
MAG	0.28497	-0.5752	-1.0628
DOT1L	0.84678	-1.1342	-1.2032
HTR5A	-0.45289	0.16665	0.14407
SRPK1	-1.7808	1.9559	1.6302
POLR2L	2.9874	-3.2725	-2.4227
HTR3E	-0.31847	0.036758	0.086062
GABRA4	0.23052	-0.51073	-0.19805
MAP2K1	-0.75298	0.49924	0.60636
MSLN	0.80148	-1.0796	-0.85124
GGPS1	-1.0508	-0.9153	0.91022
MAP3K9	-1.1154	0.16543	0.97504
CTSB	-0.08314	-0.1936	-0.46905
F11	-0.34718	0.07534	1.216
RXRB	-0.50292	-0.56513	0.36508
PTGIR	0.34387	-0.61311	0.64507
PIK3R6	0.72111	-0.98831	-0.41759
MYLK	0.33044	-0.5899	-0.11724
COL4A5	-1.9672	1.4505	1.8401
KDM6B	-0.061049	-0.19835	0.20309
PDK4	-0.60979	0.19876	0.4848
MMP2	-0.32067	0.074324	0.67826
CYSLTR1	-1.4138	0.077909	1.2949
MMP8	-0.1348	-0.11099	-0.57533
NDUFA2	0.76941	-1.0072	-0.85883
AQP1	-0.22688	-0.0091317	0.15155
PRKG1	-1.1762	3.0371	1.0597
KLK6	-0.087538	-0.14651	0.33403
TUBG1	0.83825	-1.0654	-0.34073
CPT1B	0.026459	-0.25058	-0.40604
RXRA	0.049591	-0.27088	-0.6115
SSTR4	-0.078925	-0.14117	-0.28263
IL10	-0.057036	-0.16032	0.54004
PBRM1	0.21311	-0.4251	0.0021846
SUPV3L1	0.82414	-1.0319	-1.2609
HTR1A	-0.058039	-0.14931	-0.091366
PTGER1	-0.13449	-0.0678	0.19843
AOC3	-0.53691	0.33837	0.43705
PIK3R1	-1.1493	1.9257	1.0528
KCNG1	0.32796	-0.52885	-0.76935
CDK16	-0.75855	-1.1735	0.66909
NDUFA10	0.73618	-0.93522	0.070508
BRSK1	-0.57213	1.0453	0.48397
DHODH	1.4522	-1.6492	-0.53474
CD14	0.014515	-0.20726	-0.48963
RPS11	1.7666	-1.9515	-1.2786
GRIA1	-0.6415	-0.35056	0.55655
DYRK1A	0.92976	-1.1129	0.4827
GPN3	0.74736	-0.92903	-0.12536
TYK2	0.32103	-0.50253	0.64264
CECR2	0.57567	-0.75134	-0.45862
ORAI1	-0.36209	0.19707	0.53845
GJA5	0.48418	-0.64767	0.384
PNLIP	-0.11468	-0.047878	0.14099
KLK3	-0.39766	0.23708	0.45327
FZD1	0.5292	-0.68678	-0.28353
ANPEP	-0.057518	-0.099829	0.65564
MMP15	-0.11921	-0.035252	1.0969
MKNK2	0.21501	-0.3691	1.0117
SIRT1	-0.55269	0.38912	0.49762
PSMB4	2.6088	-2.7611	-1.2755
CACNA2D2	-0.34241	0.19476	0.0067921
CAMK1D	0.34215	-0.48597	-0.4113
GJB5	-0.16355	0.019967	-0.11742
MME	-0.49739	0.36034	-0.78237
KCNK18	-0.22738	0.091365	-0.3915
CYP26A1	0.21464	-0.34763	0.41823
NAMPT	0.44255	-0.5745	-0.077852
PSMC6	1.3675	-1.4981	0.17855
ADRB1	-0.075916	-0.052862	-0.1263
KCNC1	-0.17859	0.053603	0.34893
KDR	0.62257	-0.73526	-0.072626
CHRM3	0.50786	-0.61441	0.2694
NEK3	-0.55104	0.038886	0.51604
AURKB	0.52166	-0.62394	-1.0026
P2RY11	0.039713	-0.14058	-0.35341
APOB	-0.089145	-0.010937	0.09325
TGFBR1	-1.2235	0.56015	1.1913
TERT	0.69514	-0.78571	-0.33157
XIAP	0.41523	-0.5057	0.053654
BAZ2A	0.16073	-0.24794	0.36338
CACNA1A	-0.84603	1.2086	0.82294
FZD7	0.5933	-0.67573	-0.034409
ADRB2	0.47546	-0.55583	-0.87954
PADI4	-0.5808	-0.28272	0.56559
GRM1	-0.54624	0.30829	0.53254
EZH1	-0.066574	-0.01346	0.59244
CACNA1E	0.19417	-0.27359	0.4343
SLC28A3	-0.86498	0.89415	0.85334
CACNA1F	-0.25741	0.17809	-0.33545
PROKR2	-0.84526	0.3774	0.83605
FOLR1	0.4189	-0.49677	-0.42269
ADK	-0.12676	0.049109	-0.90099
SLC6A14	-1.4359	0.54139	1.4302
CPA1	0.20149	-0.27868	-0.42312
ADRA1A	-0.077119	0.010627	0.49295
KCNJ11	-0.69238	2.8802	0.68798
PSMD11	0.68587	-0.75079	-2.6291
FNTA	1.3105	-1.3753	-0.88746
CCR1	0.29167	-0.35619	0.29763
PDE11A	0.72513	-0.78956	-0.20988
EPHA2	-0.15995	0.097993	-0.22514
PBK	0.54237	-0.60268	1.0286
PASK	0.24734	-0.30303	0.36443
IL15	-0.16345	0.1147	0.27898
PDK2	0.40271	-0.44871	0.26907
RPL3	1.6783	-1.7232	-1.3068
GRIK1	0.17855	-0.21964	0.34445
LGMN	0.61145	-0.64994	-0.18001
F2R	0.54104	-0.57875	0.72521
PADI1	0.38032	-0.41744	0.27036
HTR2C	-1.7087	0.58894	1.7346
PDGFA	0.26951	-0.30637	0.53787
ADRA1D	-0.21974	0.18782	0.21518
KCNA4	0.58115	-0.60751	0.34664
BRDT	0.29461	-0.32057	0.2721
PDK3	0.8347	-0.85757	-0.091668
IL1R1	0.12101	-0.1336	1.202
TESK1	0.16824	-0.17677	0.12521
KCNG2	-0.15883	0.15106	-0.28713
MAPK9	0.23954	-0.24401	0.96143
ABCA1	0.18242	-0.18474	-0.65594
CHRNA3	-0.56407	0.81688	0.59955
EPHB4	-0.20588	0.2041	0.35214
HSPA8	1.6989	-1.6985	-1.0343
CUL4A	0.76158	-0.75944	0.31066
NTRK1	0.7177	-0.71391	-0.21941
CDK10	0.86949	-0.86463	-1.4449
P2RX2	0.099257	-0.093306	-0.85872
PRKG2	-0.44529	0.45168	1.0033
MERTK	-0.53187	3.9151	0.57492
MAP3K11	0.30025	-0.2936	0.027074
STK38L	-0.16896	0.18045	0.40208
PRKX	-0.20754	0.21982	0.2528
NR1D1	0.014628	0.0051893	0.76996
HSP90B1	0.73523	-0.71335	-0.51828
MAP3K13	-0.72493	0.74365	0.77114
AKT1	1.1061	-1.0839	0.3665
NGFR	0.99405	-0.96869	-0.40813
FGR	-0.38107	0.40831	-1.0408
MAST3	-0.020877	0.048192	0.42985
MAPKAP1	0.61822	-0.58587	0.59945
MMP9	-0.55365	0.13805	0.61586
IL12A	0.022258	0.015064	-0.32734
KCNA3	0.12502	-0.086883	0.63638
AGRP	-0.15581	0.19697	-0.32195
MKNK1	0.30742	-0.26467	0.33921
CSNK1G2	0.42648	-0.37941	-0.1581
AARS	1.6878	-1.6403	-1.4915
ERG	0.014618	0.037983	0.091258
STK31	-0.33992	0.39826	0.056628
CACNA1D	-0.79744	-0.3667	0.87514
ROS1	0.31679	-0.25743	-0.5996
CSF2RB	-0.20995	0.26947	0.058191
HCRTR1	0.23471	-0.17486	0.17538
SETD2	0.71429	-0.65317	-1.4403
NDUFS7	0.26268	-0.20069	-0.59575
IDE	0.25319	-0.18721	-0.26026
SLC1A6	0.62735	-0.56018	0.026805
TASP1	0.22485	-0.15453	0.0519
ACVR1	-0.30365	0.37671	0.22974
LIPE	0.36699	-0.29013	0.36086
DPP4	0.46721	-0.389	-1.2982
PCSK4	0.85085	-0.77237	-0.26811
PDGFB	0.028677	0.049821	-0.14104
NR1H3	0.53119	-0.45223	0.067648
PTGER2	-0.96217	-0.35661	1.0721
WDR5	1.0599	-0.9737	-0.90422
CA7	0.20836	-0.11854	0.0341
PRKACG	0.69342	-0.60219	0.52496
SIRT2	0.04004	0.051342	0.55753
HTR6	-0.21224	0.30808	0.21182
TYRO3	0.82615	-0.73016	0.62416
FGB	-0.10628	0.20343	0.62583
PCSK9	0.99285	-0.89372	-0.0046187
ALOX15B	0.5128	-0.41291	0.023643
FFAR1	0.73436	-0.63333	0.51011
ADRA2C	0.13606	-0.033389	0.35064
ADH1A	-0.054714	0.16066	0.95577
CCR5	-0.2802	0.3878	0.57568
NGF	0.74057	-0.63185	-0.54569
CCKAR	-0.65073	-0.33091	0.79818
APLNR	0.87699	-0.76826	2.3408
MAP4K2	-0.2629	0.37378	-0.24152
CHRNA2	-0.68716	-0.56616	0.84263
NLK	0.90235	-0.79105	0.58056
NR2E3	0.71304	-0.59414	-0.49606
SLC5A2	0.15758	-0.031106	-0.53679
RPS6KA5	0.88246	-0.75587	1.8896
PTGDR2	0.81759	-0.69054	0.27253
IRAK1	-0.13605	0.2655	-0.33069
PDE6A	-0.98684	1.6413	1.1478
IL13	0.32887	-0.19931	0.028766
ART1	-0.26233	0.39447	-0.59443
HTR3B	1.2403	-1.1076	0.39811
SERPINA1	0.27024	-0.12925	1.4436
PSMD1	0.50542	-0.36366	-0.014005
GRIK2	-1.0236	1.4419	1.1902
ITGA2B	0.46844	-0.32624	-0.25039
TLR8	-0.22572	0.36967	0.26697
NDUFS8	1.8316	-1.6869	-1.511
AKT1S1	2.15	-2.0039	-0.49911
SV2A	-0.14982	0.29743	0.19238
KIR2DL3	-0.11661	0.26457	0.98078
RARA	0.56417	-0.41318	-0.4078
ALOX15	0.057615	0.09642	-0.26133
PHKG1	0.49757	-0.34105	0.22491
ATP1B2	0.31621	-0.15546	-0.26652
SLC29A4	1.0576	-0.89459	-0.5954
TPO	0.23086	-0.067389	0.70072
PNMT	-0.088547	0.2526	-0.14651
CALCB	0.24492	-0.080783	-0.55251
CACNA1B	-0.1574	0.32329	-0.013868
NEK7	0.56234	-0.3954	1.1522
GPR87	-0.57562	0.87868	0.77093
CTSE	0.95049	-0.78121	-0.33985
TNF	0.23458	-0.064281	0.47719
FZD2	0.063113	0.10733	-0.1035
CACNB1	0.43947	-0.2668	-0.44489
EPHA5	-1.2796	1.656	1.4817
PDE4A	1.0158	-0.84173	-0.64824
ITPKB	-0.16603	0.34067	-0.069931
GLP1R	-0.075017	0.25225	-0.04375
CA2	0.092082	0.090208	0.22754
CDK19	0.71805	-0.53433	0.36978
PAH	-0.47913	0.66793	0.64814
PRKCZ	0.56737	-0.37712	-1.0958
LY96	0.68675	-0.49492	0.15261
PLCG2	0.42627	-0.23413	0.020525
ILK	0.59731	-0.40349	-0.056205
IMPA1	0.87184	-0.67789	1.0876
ESRRA	-0.29672	0.4939	-0.27794
KCNA1	0.23689	-0.033868	0.3707
STK17A	0.13272	0.072663	0.38006
APEH	0.78479	-0.57766	-0.70901
STS	-0.74785	0.12296	0.98409
ECE2	0.25176	-0.0433	0.2555
HTR7	-0.094007	0.3089	-0.11059
AAVS1	-0.077577	0.29535	0.083947
TAAR1	0.045781	0.17983	0.86051
IL12B	-0.25421	0.48384	-0.15449
SCN3A	-0.73435	2.6742	0.98219
HDAC10	0.70001	-0.47018	-0.32502
ZAP70	0.30663	-0.076764	0.7031
PLD1	0.36214	-0.13046	1.1157
AQP7	0.13127	0.10072	-0.10282
RTN4	0.55904	-0.32317	1.0032
CIAO1	1.2961	-1.058	-0.069184
ROSA26	-0.27566	0.51616	0.36994
TRPV3	0.22157	0.019877	0.70003
LPAR1	-0.50367	2.8189	0.76489
ADRB3	-0.053506	0.29666	0.69082
NDUFA5	0.26035	-0.015373	-0.026803
CYP1B1	0.97021	-0.72489	-0.14763
TAOK1	-0.20692	0.45357	0.019019
GJA1	-0.0042015	0.25239	-0.10042
ADORA2B	-0.20298	0.45322	0.33129
KCNK9	-0.56237	-0.73846	0.83177
FZD8	0.55446	-0.30137	-0.084604
SLC1A2	0.3083	-0.052856	0.79873
ADAMTS1	-0.19686	0.45354	0.34162
LTA4H	-0.010958	0.26792	0.28758
GGCX	1.7903	-1.5325	0.15606
IGF2	0.0344	0.2321	0.088798
NPR3	-0.077248	0.34633	0.29456
MAPK11	0.017481	0.25562	-0.43153
FCER2	0.033795	0.23966	0.90929
SCNN1G	-0.31331	0.59197	0.078853
YARS2	1.9477	-1.6688	-1.7652
PSMF1	0.4378	-0.15871	0.70068
ZACN	1.1186	-0.8355	-0.72142
CHRNG	0.63551	-0.35075	0.034376
PDE6D	-0.053247	0.34165	-0.49714
NPFFR1	0.2364	0.052705	-0.27009
ADRA2A	0.34471	-0.050129	-0.043254
DHDDS	3.7546	-3.4578	-2.1502
P2RY13	-0.11655	0.41353	-0.0556
SPHK1	0.5107	-0.21092	0.16038
MMP13	0.38921	-0.085891	0.45823
PRKCG	0.025967	0.27992	0.58426
MC5R	0.60901	-0.30303	-0.2591
TMPRSS2	0.65925	-0.35299	-0.34261
CDKN1A	-0.09211	0.3996	-0.08643
CSNK2A2	0.12928	0.17952	0.37339
EPHB3	0.16361	0.14578	-0.47306
ENTPD2	0.19788	0.11343	-0.33262
LSS	-0.2691	0.58105	-0.56435
GABRA5	0.60975	-0.29539	0.68363
TLR9	0.14087	0.18257	-0.10508
ODC1	0.2612	0.062333	-0.029665
SLC22A12	0.245	0.079239	-0.25106
MTNR1B	-0.081313	0.40813	0.032945
AKT2	0.32837	0.0022337	0.49433
GP1BA	1.3364	-1.0031	0.23194
BIRC2	0.86704	-0.53123	0.37523
CA6	0.47803	-0.14111	0.34197
RPS6KA4	0.029133	0.30879	-0.9003
PPARD	0.26486	0.075508	0.088647
PCSK1	0.058196	0.28308	-0.29927
PAK4	0.51586	-0.17437	0.20879
GNB2L1	2.8396	-2.4976	-0.60283
SPP1	-0.018402	0.36043	0.054424
MAPK14	0.21063	0.13218	-0.09515
ACVR2B	-0.10929	0.45323	0.072531
MAPK3	-0.038828	0.38409	0.086837
SRD5A1	0.31469	0.030902	1.0314
PROC	0.77085	-0.42246	0.63495
CACNG7	-0.093715	0.44297	-0.45513
AQP9	0.57177	-0.22001	-0.041895
BANF1	0.3031	0.050964	-0.65887
NAT1	0.11586	0.24015	0.14384
CES1	0.4469	-0.088831	0.11909
PTPN6	-0.37988	0.74018	0.59848
P2RY4	-0.23717	0.59873	0.15277
SLC22A2	-1.4837	1.0497	1.8445
SSTR1	-0.33086	0.69425	0.31898
SELP	1.2739	-0.91	-1.1134
PANX3	0.83836	-0.47029	0.31678
MMP10	0.4709	-0.099946	0.58042
RPS9	2.5791	-2.2075	-0.45443
RPL37A	1.0743	-0.70141	-0.7285
EIF5	1.9132	-1.5332	-0.44462
CASP2	-0.73122	1.4434	1.1025
CASP7	0.48041	-0.096291	-0.53208
BIRC5	2.1605	-1.7707	-0.31409
TOP2A	1.7801	-1.3895	-0.76153
ACVR1C	0.076667	0.31514	1.4514
PTCH1	0.65236	-0.25917	0.08635
FGFR3	0.83069	-0.43341	-0.35384
PIK3CA	1.5229	-1.1236	-0.34042
ATP1B1	-0.48028	0.88336	0.94255
PSME3	1.8524	-1.449	0.95827
LTB4R2	0.68871	-0.2792	0.092508
PDE6B	0.30357	0.10853	0.12822
PSMB5	1.167	-0.74756	0.064852
TRPV4	0.57867	-0.15882	-0.062884
PTGER4	0.91083	-0.49052	0.050856
CACNG6	0.43819	-0.01764	0.10653
MMP25	0.82687	-0.40266	0.37298
COPS6	0.0094225	0.41548	-0.6212
SETD7	-0.3439	0.76964	0.038929
DAPK3	0.57695	-0.1502	-0.23786
PCSK7	0.43012	-0.0019758	0.56738
STK24	0.21603	0.2128	-0.24545
PRRT2	0.052036	0.37915	0.31089
WNK3	-0.63472	0.42651	1.0475
KCNJ5	0.65278	-0.21642	0.49651
CTSL	0.30088	0.13697	0.38974
MAP3K12	2.7457	-2.3069	-1.7512
C5AR2	0.22979	0.20926	1.3703
GABRA6	0.25196	0.18715	-0.35627
IL2RG	-0.61041	-0.30238	1.0343
BMP1	0.23822	0.20263	0.80861
ARAF	0.18458	0.25698	-0.81913
BAX	1.115	-0.67089	-0.33739
ITGB5	0.87931	-0.42842	-1.1295
NTSR1	0.014256	0.4391	-0.35173
RPE65	0.063368	0.39104	0.37898
PROKR1	0.84789	-0.39256	-0.29907
ABCC4	0.073758	0.38263	0.28514
DGAT1	0.29017	0.1688	-0.74663
AGER	0.79913	-0.34009	0.30713
NDUFB2	0.96494	-0.5037	-0.4628
NR3C2	-0.2329	0.69439	-0.11881
CACNA2D3	-0.38865	0.85057	0.48255
IL1B	0.34644	0.1245	1.0238
OXTR	0.33259	0.14035	0.47148
TDO2	-0.44085	0.91727	0.086174
DCLK1	0.62037	-0.14246	0.71777
HNF4A	0.36259	0.11541	0.31815
PDE8B	0.48644	-0.0069896	0.45393
SLC6A2	-0.31483	0.79484	0.48457
RUVBL1	1.8853	-1.4027	-2.567
HDAC11	1.4369	-0.95194	-0.62133
UTS2R	-0.050155	0.53516	0.084235
SLC6A4	0.51411	-0.025964	0.9571
GRIN1	0.03069	0.45774	-0.81586
ADH1B	0.50247	-0.01296	0.34265
HDAC4	1.0209	-0.52804	-0.45238
CHRM4	0.45804	0.035125	0.34823
CBX4	0.47938	0.014102	-0.70733
STK4	2.0691	-1.5743	1.4838
CPN1	0.50132	-0.0019788	-0.17193
PDE9A	0.24835	0.25776	0.4
RORB	0.11063	0.39601	0.32284
PCSK2	0.50107	0.0073617	-0.47529
CYP27B1	1.5336	-1.0233	0.10204
ADRM1	1.1994	-0.68747	-1.8469
MPO	1.4107	-0.89584	-0.43117
HMGCR	1.2983	-0.78022	-0.13927
PRMT8	-0.47924	0.99782	0.12344
RXFP2	0.95345	-0.43202	-1.1771
CHRM5	0.17707	0.34746	0.99443
ALMS1	0.36054	0.16416	0.18668
KDM2A	1.6301	-1.104	-0.2229
BCHE	-1.748	2.312	2.2474
PRKD2	0.90647	-0.38007	-0.80171
CDK18	0.57708	-0.046444	-0.27176
REN	0.16817	0.36576	1.422
GRPR	-0.88401	-0.66937	1.39
TRIM24	0.56349	-0.028432	-0.65729
MINK1	0.65878	-0.12175	-0.047851
DPP9	1.0611	-0.52194	0.093162
SLC44A1	0.56872	-0.028524	0.73789
AQP2	1.0445	-0.50271	-0.18786
MAP2K2	0.76151	-0.21635	-0.3548
SRD5A2	0.44259	0.10279	0.22343
JAK1	1.1306	-0.58437	-0.25041
SIRT3	0.95644	-0.41007	0.99423
PDK1	0.17264	0.37509	-0.40525
STAT1	1.4182	-0.87011	-0.80959
PI4K2A	0.40507	0.14561	-0.51286
VKORC1	0.70911	-0.15752	0.3355
ITGB3	0.40063	0.15503	0.32129
INHBA	0.55354	0.0052293	-0.65403
ALDH2	0.73508	-0.16869	-0.23689
TPH2	2.1001	-1.5327	0.29414
CDK14	0.11945	0.45601	0.52577
PSMD12	1.8429	-1.2608	-0.96778
EPHA8	0.30507	0.27826	0.60248
EPHA4	0.95832	-0.37258	0.98107
DCLK2	-0.11173	0.70134	-0.076786
IDO1	0.79548	-0.20583	-0.097393
GJD4	-0.16632	0.75602	0.13516
ABCB1	0.31321	0.27693	0.30857
TGM2	0.26053	0.32983	-0.11729
PDE5A	0.22684	0.36809	0.036812
CALCRL	0.83513	-0.23984	-0.35438
CYP11B2	-0.071168	0.66775	-0.3179
ATP1A1	1.6045	-1.0069	-1.0432
GHR	-0.13371	0.73851	0.39959
ACR	0.029663	0.57931	-0.32785
BRD7	0.27683	0.33344	-0.68993
PSME1	0.26556	0.34477	-0.62786
PDE6G	0.74064	-0.12656	-0.31204
GLRA3	0.98377	-0.36716	0.31177
TXNRD1	-0.054356	0.67326	-0.54197
TPSAB1	0.84411	-0.22146	-0.83941
ATP6V0C	0.64466	-0.018163	-1.2907
CA3	0.56468	0.064187	0.94776
KCNJ14	-0.16706	0.79672	-0.21204
TNK2	0.59989	0.029986	0.40762
PDE1A	-0.74134	1.4969	1.3181
PTK2B	0.77417	-0.14277	0.7523
TTK	1.1561	-0.52016	-0.30669
RXFP3	0.31605	0.32393	-0.34827
RBP4	0.55272	0.092845	1.8109
LPAR2	-0.19096	0.83682	-0.61192
SOST	0.33952	0.30748	0.54324
APCS	-0.055703	0.70675	0.063037
NDUFA11	1.9751	-1.3224	-1.8105
HRAS	-0.096844	0.75415	-0.2801
IL5RA	0.29655	0.36485	0.83532
PARP1	0.24072	0.42586	-0.83517
RCE1	1.4606	-0.78968	-0.035839
ERAP1	0.76797	-0.085784	-0.3781
PSMB3	0.91041	-0.22324	-0.94513
PRKAR2B	-0.80507	1.2055	1.4083
ALK	0.87604	-0.17822	-0.25915
PSMD3	1.7923	-1.0857	-1.5107
CENPE	2.2247	-1.5164	0.81598
CASP10	0.016283	0.69206	-0.69576
MBTPS1	1.4119	-0.70287	0.71481
UTP20	2.8835	-2.1696	-1.7344
CXCR2	0.32732	0.38798	-0.031526
FPR2	0.82088	-0.10011	0.7328
SLC6A5	-0.43909	1.1621	0.11274
AVPR1A	1.08	-0.35469	0.48513
SGK1	1.3836	-0.65808	-0.42376
NDUFB5	0.851	-0.12353	-0.13833
CDK11B	1.4532	-0.72395	0.21783
RUVBL2	1.3654	-0.63134	-1.7158
CTSS	0.7135	0.0249	-0.43833
XPNPEP3	0.21052	0.52896	0.091731
MAP4K4	0.13727	0.60607	-0.97359
PRSS8	0.22355	0.5205	0.17331
USP14	0.17604	0.57199	0.40672
CHRNB2	1.3302	-0.58027	-0.22489
C1QB	-0.19919	0.94981	1.45
CD274	-0.29481	1.0467	-0.21693
TNFRSF8	1.3896	-0.63756	-0.18508
SGMS1	0.59014	0.16896	0.081376
CREBBP	1.3511	-0.58834	-0.42425
SLC5A3	0.42585	0.33875	0.72079
CTSH	0.39948	0.36751	0.56852
SLC22A11	0.8663	-0.096703	0.2818
RPS6KA3	0.5935	0.1808	0.78763
BRD1	0.87453	-0.096801	0.19187
EPHB1	0.037999	0.74062	-0.36814
KCNN2	0.45826	0.32722	0.23377
KCNJ10	0.84321	-0.057229	0.10038
KCNC4	1.1566	-0.36721	-0.017721
TH	-0.50915	-0.58296	1.1672
NDUFS5	0.83575	-0.040474	-0.8053
TAF1	-0.48351	1.28	-1.4564
BTK	0.19575	0.60447	0.12923
ATP1A3	0.35892	0.44168	1.0556
PTK2	1.8134	-1.0123	-0.08662
RYR1	0.3481	0.4624	-1.0926
CASP14	1.3529	-0.53592	0.2972
GPN2	2.5561	-1.736	-2.5991
TGFBR2	-0.080133	0.90533	0.50501
PIM2	0.53162	0.29532	-0.22984
ADRA2B	0.59163	0.23547	0.073711
MMP14	0.39552	0.43406	-0.52784
ITPR1	0.71802	0.11735	0.63707
ABCC1	0.40115	0.44101	-0.37329
NFKB2	-0.1168	0.96001	-0.27436
KCNS2	0.11616	0.73024	0.63809
SLC16A1	0.99753	-0.14943	0.19533
AOAH	0.23836	0.61655	0.50371
SLC1A5	1.3423	-0.48448	-0.4788
ECE1	0.38533	0.47384	-0.18793
ECT2	1.3771	-0.51643	-1.3314
RPS8	2.8494	-1.9735	-3.0081
ELANE	0.64315	0.2366	0.21602
TNFSF4	0.82791	0.053291	-0.65771
TNFSF13	0.89783	-0.015816	0.21185
CTSV	0.50271	0.38467	0.11309
UGCG	-0.35899	1.2484	1.4883
PIK3C2B	2.0653	-1.1734	0.082819
PLG	0.0073933	0.88791	-0.21641
PSMA3	-0.45581	1.3536	-0.35745
AKR1A1	0.6307	0.26872	-0.78206
SLC22A6	1.3727	-0.46788	-0.25893
FZD5	0.043179	0.86297	0.39348
ESR1	1.5849	-0.67526	-0.67545
MMP26	0.22746	0.68718	0.19185
TPX2	0.10315	0.81353	-0.40455
GRM6	0.20886	0.71503	0.70646
DDR1	-0.37345	1.298	-0.31735
MET	-0.19202	1.1172	1.3333
GRK7	1.2345	-0.30905	0.35867
KARS	0.12499	0.80276	-1.2332
CSNK2B	2.1506	-1.2221	-0.4394
AGTR1	0.33348	0.59565	0.63733
NDUFAF3	2.3223	-1.3919	-1.2657
FKBP1A	0.0046582	0.92605	-0.14699
CCL2	-0.76312	0.66105	1.5165
AQP3	0.16219	0.77822	0.28136
CYP2C18	0.63353	0.32229	0.49623
MAPK12	1.133	-0.17313	0.2164
PSMB10	-0.15567	1.116	-1.0845
MAOA	0.93628	0.026943	0.49872
EED	1.2205	-0.25639	-0.70743
MAP2K5	-0.66389	2.571	1.4393
FER	0.53831	0.42624	-0.15768
CCR4	-0.10703	1.0871	0.41512
JAK3	0.25025	0.73287	0.38508
ITGA5	0.70167	0.28339	0.29534
PSMA5	2.7143	-1.7272	-0.36316
CLK1	0.096142	0.89153	0.22751
SERPINE1	0.23938	0.74927	0.68767
SLC6A9	0.82352	0.16577	-0.41027
WDR74	-0.46681	1.4594	-0.45951
RICTOR	1.2134	-0.2177	-0.062296
SLC7A5	0.71682	0.28857	-0.45915
GPR55	0.10336	0.90667	-0.35481
TBCD	1.2472	-0.22054	0.023338
PIK3C2G	-0.78303	-0.52859	1.589
SLCO1A2	0.32567	0.70368	0.64925
BACE2	0.49055	0.54879	1.2286
CACNA1H	1.462	-0.42026	-0.63158
PRSS1	-0.45573	1.5027	0.43538
LTB4R	1.0218	0.027202	-0.051543
EGFR	0.53712	0.51241	-0.089105
PMPCA	1.3564	-0.30252	-1.8605
GRK4	1.093	-0.036847	0.12977
CTSA	0.65954	0.39752	-1.3613
CD2	0.26004	0.79885	0.48143
GCGR	1.4494	-0.38813	0.15854
TNFSF14	0.71061	0.36921	-0.32224
AQP6	1.318	-0.2357	-0.43146
PIK3CG	0.67909	0.40817	0.52601
PSMA4	2.2892	-1.1983	-1.8653
NDUFV1	1.6673	-0.57634	-0.85033
BMP10	0.52113	0.57326	0.17301
LATS2	0.70686	0.38779	-0.94355
RRM2	1.7063	-0.60826	-2.0929
NR3C1	-0.22016	1.3191	1.1314
CA9	0.70804	0.3954	-0.16053
CD3D	0.26986	0.84069	-1.0887
NMBR	0.69172	0.41886	0.10503
ADAM12	0.61653	0.49715	-1.0992
DRD4	0.1314	0.98279	0.89503
IL2RA	0.72851	0.38576	-0.14662
TUBA1C	1.3558	-0.2386	-1.4562
MTNR1A	0.13839	0.98458	0.45736
FGF2	-0.16558	1.2902	0.094324
HTR1E	0.57313	0.55559	0.20155
SLC23A1	1.2673	-0.13337	-0.74806
EIF2AK3	-0.094255	1.2323	0.76715
ATP2A2	2.4876	-1.3405	-2.5734
SLC9A3	-0.55558	-0.36849	1.4113
KCNS1	1.3307	-0.18229	-0.030939
TMEM199	1.4481	-0.29751	-0.51894
DIO1	0.42039	0.73508	0.21772
GRIK4	0.59607	0.5598	-0.1359
CHRNA6	0.064067	1.094	0.96532
POLA1	0.94216	0.21979	-0.056043
EGLN1	0.61666	0.54792	0.78285
CAPN2	1.3023	-0.13463	-1.2138
KCNA5	-0.12207	1.2946	-0.66954
FARSA	1.4344	-0.25838	-1.0959
PTAFR	-0.48108	1.6628	-0.44049
RPS6KA2	0.1769	1.0086	-0.34244
GABRR1	1.0497	0.13841	0.13761
CAMKK2	0.10094	1.0958	-0.095316
CYP2B6	0.71771	0.47974	0.5662
TRPV1	0.44542	0.75944	0.39798
EPHB2	-0.58047	-0.030455	1.4755
AQP10	1.8212	-0.61376	0.36742
POLR1B	1.4985	-0.29012	-0.75588
PTGIS	-0.093811	1.3078	-0.43606
PDE6C	0.36112	0.8558	1.5095
EPHA3	0.35763	0.86238	0.48709
DRD3	1.0573	0.16519	0.55712
NDUFA4	0.17282	1.0532	0.29063
ITPKA	0.71854	0.51236	-0.030051
WNK1	1.632	-0.40083	0.23196
ABHD6	0.47257	0.76331	0.4531
RRM1	2.725	-1.4833	-2.01
GRK5	0.93049	0.31223	-0.1212
SLC18A1	0.10539	1.1521	0.41113
DNMT3A	0.34026	0.91883	0.47067
WEE1	0.40745	0.85413	-0.86583
P4HTM	0.7452	0.52319	0.49467
MC2R	0.35119	0.91981	0.040844
ICAM3	-0.31958	1.5915	-0.29309
PLD2	-0.23442	1.5158	-0.81486
GJB2	2.0081	-0.71694	-0.49065
USP5	1.7615	-0.46652	-1.0292
IL22	1.2979	0.0045693	-0.11786
PARP3	0.18771	1.116	0.50145
SCNN1A	0.72036	0.58464	-0.075021
SMC3	2.5446	-1.2388	-0.49302
SPTLC2	1.2007	0.10783	0.2349
VIPR1	0.15833	1.1535	1.0307
NDUFB10	2.3989	-1.0849	-2.9788
NDUFA13	2.2663	-0.94865	-0.83785
SLC28A2	0.03116	1.2875	-0.46458
GHSR	0.9477	0.37385	-0.28092
CDK3	1.3089	0.022175	0.15014
TYMS	1.5735	-0.23847	-1.0865
PSMD4	0.61901	0.71774	-0.30956
F12	0.49823	0.84055	-0.039845
GJC2	0.57481	0.76693	0.25897
F2RL1	0.035255	1.313	0.29485
AHCY	-0.046015	1.3957	-0.61826
NOTCH1	0.76645	0.586	0.19956
GPER1	0.42332	0.93028	0.94402
CLK4	1.2076	0.1468	0.79252
SSTR3	-0.039796	1.4029	0.091561
SLCO1B1	-1.6218	-0.24901	2.5971
PDE4B	0.60243	0.76585	0.5654
PSMD14	1.1556	0.2137	-3.3071
PKMYT1	1.5324	-0.16049	-0.16909
TUBB8	3.5045	-2.1309	-2.0747
PPME1	1.7692	-0.39117	0.38173
PTPRG	2.4664	-1.0857	-0.15229
HTR1D	-0.066519	1.4482	-0.1229
SLC5A8	0.022998	1.3597	0.81421
KCNQ3	0.54107	0.84285	-0.080041
MAT2A	2.8187	-1.4301	-2.0297
PHKG2	1.4627	-0.071845	-0.22967
NDUFB3	0.99735	0.3945	-0.44734
SLC25A1	1.1638	0.22847	-1.3588
RYR2	-0.6469	0.58846	1.6612
CAMKK1	0.81272	0.58159	-0.10091
PSMC2	2.4599	-1.0572	-0.62163
PLA2G5	-0.52883	1.0058	1.5537
ABAT	0.61865	0.78616	-0.33156
CTSZ	1.229	0.17658	-0.10263
RPL18	2.9611	-1.5533	-1.4765
KCNQ2	1.2357	0.17672	0.95639
GRIA3	0.95902	0.45528	-0.18958
KPNB1	3.2021	-1.7862	-1.7852
CHRNA10	0.46835	0.94867	0.4716
PSMD5	1.0263	0.39449	-0.13618
ITGA4	-0.046416	1.4695	-1.0881
PRCP	0.88445	0.54027	0.22044
LOXL2	0.56654	0.85877	-0.16486
CDK20	1.0736	0.35268	-0.093297
TXN	0.76168	0.66496	0.17292
TUBB	1.7809	-0.35314	-0.36004
DGAT2	0.86177	0.57212	0.86991
EDNRB	0.41085	1.0244	-0.30013
TUBB2A	0.68772	0.76139	-0.022572
SLC11A2	2.1412	-0.68204	-1.0699
EHMT1	0.1613	1.3013	0.88183
CSF2	-0.49372	1.9574	-0.26709
EHMT2	1.0148	0.45722	-0.096231
PI4KA	2.0509	-0.57882	-0.30424
INPP5D	0.90132	0.58123	-0.5786
SPATA5	1.8288	-0.3371	-1.0162
DRD5	0.28289	1.2102	-0.12684
CAMK2B	-0.0048124	1.5064	-0.0082347
TUBB4B	1.1772	0.32494	-0.8188
PTGDR	-0.64016	-0.16005	1.7471
GUCY1A2	0.072562	1.4296	-0.059462
GNRH1	0.55882	0.94567	1.4832
NDUFS6	1.1228	0.38274	0.39626
PDGFD	0.70905	0.799	1.5104
DPP8	1.062	0.44673	1.2586
IDH2	0.87616	0.63286	-0.22382
KDM4E	0.10203	1.4115	-0.25682
TOP2B	0.2157	1.3053	1.1882
RNPEPL1	-0.48072	2.0031	0.15839
GRIN2A	0.55109	0.97448	-0.2937
MCL1	2.6609	-1.1305	-0.64623
PTGS1	0.27208	1.2592	0.37556
INSRR	0.442	1.0903	0.89078
NAE1	0.5452	0.98887	1.1282
XPO1	0.85009	0.68425	-0.89905
HSD11B1	1.1334	0.41268	-0.47166
AURKC	0.74551	0.80117	0.30152
NMUR2	0.79615	0.75261	-0.33279
PPAT	0.41637	1.1326	-0.11254
CDK12	1.691	-0.13675	-0.70513
PLA2G1B	0.30325	1.2626	-0.053816
TRAP1	0.52548	1.0467	-0.64481
APOH	0.95469	0.63131	1.811
MC1R	2.2549	-0.66088	-0.5519
CA13	-0.43284	2.0424	0.24459
HDAC1	0.29353	1.3197	0.20116
GRIN3A	-0.072649	1.7053	-0.16217
GRM7	1.2826	0.35269	0.16368
NDUFA1	2.5235	-0.88069	-3.1318
LRRK2	-0.122	1.7701	0.18478
MAPKAPK2	0.33265	1.3174	0.76742
F2	1.0068	0.65372	-1.2401
KCNQ4	1.439	0.22722	-0.1268
PADI3	0.72532	0.95536	1.5113
PKN2	-0.29915	1.9799	-0.79884
GALR1	-0.17277	1.8574	0.57014
KAT8	1.1751	0.51932	-0.14395
THOC5	2.5844	-0.88109	0.38936
BLVRB	0.38264	1.3399	0.33988
NOTCH4	0.79489	0.92771	0.15258
YES1	1.0633	0.66575	0.636
SMPD4	0.88194	0.87237	0.65979
TAOK3	0.17219	1.5919	0.61511
SPATA5L1	2.2695	-0.48983	-1.7195
SIK2	0.24019	1.5408	0.3396
GRIN2C	1.0115	0.77832	-0.45167
TP53	0.41878	1.3732	1.6816
BRD9	1.9174	-0.12317	-1.0227
NDUFAF2	0.86813	0.93664	0.46672
TUBB2B	1.5296	0.27973	0.51203
FAP	0.25991	1.5601	0.46144
PIP5K1A	1.791	0.060634	-0.59898
PSMD9	1.3555	0.51969	0.62585
TUBB1	1.9478	-0.071949	-0.8249
PRMT3	0.071996	1.806	0.62206
PFKFB3	0.076084	1.8112	0.028064
CAMK2G	0.68071	1.2075	-0.35413
MMP12	-0.31486	2.2057	-0.31419
MAP4K5	0.17183	1.7264	0.39922
ATP1B3	0.61318	1.3013	-1.5261
ICAM1	1.3888	0.53539	0.8932
CYP1A2	1.4738	0.45436	-0.26821
FABP5	-0.35069	2.2857	0.42031
CD74	0.24643	1.6935	-0.60819
HDAC5	0.6202	1.3254	0.33784
EIF4E	0.74558	1.2109	-0.63665
PSMB6	1.2858	0.67613	0.6592
TBK1	-0.26993	2.2337	0.12272
CYP11A1	1.2111	0.80449	0.66229
CSTF1	0.98579	1.0394	-0.26855
NDUFS4	0.067537	1.9577	0.79899
ESRRG	0.84853	1.1874	0.15013
PPARG	-0.30042	2.3636	1.1972
CAMK2D	0.11341	1.9506	-0.28582
MC3R	1.1881	0.87751	-0.54586
PRMT1	2.5651	-0.49415	-1.1599
CACNG5	0.92916	1.1474	0.61399
KDM4A	0.65156	1.426	1.7912
CARM1	1.0335	1.0496	-0.85649
NDUFB4	3.5427	-1.4334	0.89136
C3AR1	0.76557	1.3486	-0.07618
DLL4	0.46053	1.6693	-0.076327
HIPK1	1.4805	0.65005	-0.34865
HCK	2.0998	0.04308	0.74129
NDUFAF1	3.1739	-1.0114	-0.79299
FBL	2.7352	-0.57176	-1.8112
FDPS	2.3311	-0.15832	-0.1383
CACNA2D4	0.77481	1.4028	-0.5836
GABRA2	0.17016	2.0286	0.94742
FCGR2A	1.2797	0.93015	-0.57373
HTR1B	1.1519	1.0632	-0.71304
NDUFA3	0.79558	1.422	-0.60162
PSMD8	1.1029	1.1213	-0.61109
TOP1	1.9836	0.25037	-1.0869
KDM1A	1.5932	0.64085	-1.3055
FXYD2	0.77695	1.4738	1.0072
BCL2L2	2.5796	-0.32692	0.27091
HRH3	2.3407	-0.085547	-0.32564
TSSK2	0.90481	1.3505	-0.35592
CYP3A43	-0.03685	2.3174	1.275
TUBA1A	2.2619	0.032018	-2.1147
TNFSF11	0.83384	1.473	-0.20817
ULK3	0.77255	1.5364	0.16938
MLYCD	-0.18608	2.5009	-0.49629
PDPK1	2.6436	-0.31824	-0.69174
SLC16A7	0.12405	2.2185	-0.75294
FNTB	2.6321	-0.28872	-0.82294
PIK3R4	2.5119	-0.16701	-1.7303
UBA1	3.9038	-1.5479	-1.7207
KCNG3	1.9234	0.43299	0.34786
PSMC3	3.6093	-1.2482	-0.75028
NDUFA9	2.5948	-0.21143	0.68735
SCN4A	1.0372	1.3533	-0.37087
CDS1	0.46778	1.9373	0.98586
CCR9	1.0672	1.3425	0.04714
POLR3H	4.9244	-2.5142	-1.5461
ITGB7	-0.39375	2.8119	0.059516
HEBP1	1.6255	0.79325	0.78434
TEK	0.0082262	2.4184	0.56922
FABP3	-0.27105	2.7016	-0.31524
ADRA1B	-0.39555	2.8289	0.69485
CSF1	0.60816	1.8256	-0.66443
DEPTOR	0.27376	2.1863	-0.17673
F9	-0.24755	2.721	0.19624
DYRK2	0.21312	2.2776	0.54574
RAF1	1.0734	1.4388	0.35465
RXFP1	0.84579	1.6815	-0.6972
PRKDC	2.0497	0.49304	-0.6022
P2RY2	0.80345	1.7494	-0.39703
BIRC3	0.12574	2.4279	0.51752
MAPK15	0.51776	2.0438	-0.64818
PHF8	0.68101	1.8905	0.95569
PRMT6	3.1137	-0.54134	-2.3114
PTHLH	0.78815	1.8026	0.83918
NR1H4	0.024114	2.5693	0.2379
PLA2G10	3.2738	-0.67236	-2.2396
DPEP1	0.10542	2.5065	-0.070156
PSMA1	2.5266	0.09864	-1.0797
ACACA	0.49177	2.1368	-0.45832
ITGB6	0.44545	2.186	1.1673
POLR3K	4.8832	-2.2476	-1.9219
CDK15	0.45823	2.1792	-0.0444
KAT5	1.6897	0.95651	-0.63282
CCT2	1.0882	1.5803	0.16133
TMPRSS6	0.64706	2.0485	0.66777
CCR2	0.51305	2.1844	-0.23116
NDUFS1	0.99261	1.7568	-0.78288
KIF11	2.2225	0.54133	-0.67509
TAP2	1.2045	1.5638	0.10647
CYP3A4	0.38711	2.4022	0.66389
MCHR1	0.92815	1.8649	0.12223
PGF	0.33143	2.4668	-0.056829
CETP	0.57395	2.238	0.27587
CYP3A7	0.79462	2.0196	0.91632
SRP72	0.2546	2.5774	-1.2569
KDM6A	0.63788	2.1943	0.15408
SLC15A2	1.2656	1.6003	-0.10337
IMPDH2	1.0984	1.7882	0.81892
C9orf3	0.42307	2.4957	0.51847
SNAP25	2.7502	0.1836	1.3401
OSGIN2	1.126	1.8295	-0.066469
TSSK1B	-0.035457	2.9942	-0.089682
PSMD6	3.0602	-0.090078	-0.85206
RIPK1	1.0995	1.9232	0.12574
GRIN3B	0.7069	2.3248	-0.30289
SQLE	3.1163	-0.028956	-0.43678
KCNH8	0.60924	2.4937	2.1593
CTSF	0.2788	2.828	0.54713
KCNH4	0.22665	2.9248	-0.49336
KCNF1	-0.051321	3.2086	-0.21387
MAPKAPK3	-0.15846	3.3171	0.41769
KDM3A	1.7112	1.4513	-0.15252
CERK	0.69742	2.4803	-0.64585
CLK3	1.1913	1.992	-0.82071
CD86	-0.38644	3.6125	0.3768
CA4	3.9194	-0.69063	-1.8445
DHX15	-0.49252	3.7242	-0.65502
NDUFAB1	1.4509	1.7852	-1.3655
EPHA6	0.080821	3.1649	-0.50929
NDC80	1.4738	1.8382	0.44444
KDM5B	0.036533	3.2758	0.27729
PGA5	0.78809	2.5506	-0.92734
ACAT1	0.96873	2.3739	-0.41112
KLK5	0.21181	3.1464	0.11147
C8G	1.7673	1.6262	-1.8488
FGF23	-0.024955	3.4213	-0.11309
CDC42BPB	0.86321	2.5333	-0.45312
WDR75	0.2608	3.1838	-0.53185
BMP2K	2.119	1.3897	0.26419
MYLK2	2.4683	1.0426	0.28491
DCPS	3.2873	0.24962	-0.18045
HTR3A	0.78596	2.7636	0.75972
KIR2DL1	-0.016512	3.5787	-0.032255
ALG2	1.8312	1.8174	-1.5709
P4HB	1.1712	2.5033	-0.37264
CD3G	0.87326	2.8021	-0.058456
NDUFS2	3.416	0.26472	-1.0322
ACVR1B	0.96211	2.7314	0.14331
MSTN	-0.25774	3.9552	0.30254
P2RY6	0.047798	3.6508	-0.16256
KCNA2	0.90595	2.8344	-0.75157
CHKA	3.3212	0.43324	-0.42168
KRAS	-0.1525	3.9372	0.99071
PSMB11	0.97864	2.8835	-0.080612
CDK7	1.2012	2.7074	0.16281
MAPK1	1.4309	2.5186	-0.20515
EIF6	2.6847	1.2749	-2.2538
SLC12A2	1.3334	2.6408	1.8601
NRAS	0.76049	3.2301	-0.86174
CRBN	1.3836	2.6221	-0.47812
GPR139	0.46887	3.5571	-0.24784
MELK	0.90619	3.1802	-0.054799
RPS6KB2	0.075397	4.0281	-0.14736
CDC7	2.9218	1.1894	0.25304
NARS	3.479	0.67747	-0.67903
BCL2A1	0.25422	3.9376	1.7739
IRAK3	1.3583	2.8516	0.92821
SLC18A2	-0.37256	4.5946	-0.78642
POLR3A	3.7668	0.48473	-2.5565
SENP1	1.5396	2.8808	0.16244
APH1B	0.00492	4.4806	-0.57958
DNMT1	1.4608	3.0753	-0.095302
FDFT1	0.64719	3.8952	-0.61954
GABBR2	1.1333	3.4585	0.32081
FGA	0.079371	4.5641	-0.16548
ANGPT1	0.53948	4.1404	-0.30748
NAAA	0.57221	4.1253	0.57936
PLK1	5.6809	-0.94854	-0.47427
SLC6A15	0.52884	4.2875	-0.093866
CDK1	3.8017	1.0397	-1.2383
PRMT5	1.9175	2.9303	-1.5254
RPL35	3.3562	1.5402	-0.61494
TEC	0.5389	4.4222	1.38
C1S	1.3156	3.7457	0.26755
NDUFB6	1.4165	3.6528	-0.85767
SLC6A7	1.184	3.8878	0.49789
DNPEP	1.1828	3.889	0.55781
NT5E	1.3203	3.9426	-0.37969
GJD2	1.9485	3.4336	0.038841
PRKCD	0.34776	5.3048	0.079778
HMGCS1	3.7403	2.0045	-2.5441
RPS6KB1	2.5364	3.2207	-4.9645
MAP3K14	1.2346	4.5914	0.9221
CDK4	3.9116	2.3503	-1.5128
ITGAV	2.275	4.6951	-0.27
Zhang_294	1.3948	5.6538	0.73237

## Sheet: Diff_Score
Gene	AFDKO- sgAAVS1	PTDKO- sgAAVS1
SOD1	-2.29384	-2.34204
MAP3K3	-3.29426	-1.16082
SMARCA4	-1.60226	-2.62646
MVK	-2.577	-1.6307
ITGAL	-0.90087	-2.33682
CNGA3	-1.6225	-1.3877
NDUFA6	-1.471	-1.3103
DHFR	-1.8559	-0.9241
CA5A	-1.35627	-1.30919
NDUFB7	-1.3917	-1.2093
SCNN1B	-1.98991	-0.413681
VWF	-1.20309	-1.1388
PRKCA	-1.09074	-1.17866
BCL2L1	-1.99916	-0.227069
HPSE	-1.10177	-1.05224
PMVK	-0.8996	-1.2268
CXCR4	-0.97886	-1.08134
CDK5	-1.82012	-0.193173
PSMD11	-0.06492	-1.94323
NDUFAF4	-1.02915	-0.96258
KCNK3	-1.16475	-0.81942
GIPR	-1.79949	-0.150093
GALR3	-1.24608	-0.68594
EGFL7	-0.83745	-1.06579
PTH2R	-1.38355	-0.49148
FURIN	-1.1434	-0.70045
CACNA1G	-0.68456	-1.13179
METAP1	-1.62348	-0.19079
HTR3C	-1.19257	-0.59296
GART	-1.84047	0.06787
ERBB2	-1.15361	-0.61112
TUBB6	-1.62958	-0.10954
MAPK13	-0.5648	-1.15934
NDUFB11	-2.0012	0.289332
FYN	-1.63009	-0.00338
KCNA10	-1.45748	-0.175848
NTRK2	-0.503826	-1.12442
PLAU	-0.40077	-1.21513
SLC9A5	-1.109	-0.50413
CD248	-0.50393	-1.08566
STK36	-1.02434	-0.52243
C21orf33	-1.16038	-0.32212
IL1R2	-1.5079	0.04522
HTR3D	-1.27935	-0.16743
GLRB	-1.36794	-0.07374
MME	-0.13705	-1.27976
LTC4S	-1.10058	-0.31288
HIF1A	-1.10119	-0.306268
MLKL	-1.4005	0.00108
FGR	0.02724	-1.42187
CYP11B1	-1.39113	0.03824
CYP27A1	-1.49065	0.14249
ACVRL1	-1.18431	-0.11829
TNK1	-1.22784	-0.072177
SRD5A3	-1.21863	-0.07212
CCND1	-1.1592	-0.1179
KMO	-1.52848	0.30103
TAF1	0.79649	-1.93991
SLC12A3	-1.38219	0.24885
ADK	-0.077651	-1.02775
C5AR1	-1.18955	0.10344
KLK1	-1.25787	0.21972
PDE1B	-1.16811	0.170881
C5	-1.33023	0.37793
SRPK2	-1.04976	0.17184
DMPK	-1.01114	0.15941
GJB3	-1.05613	0.27563
CPB2	-1.72251	1.01913
IDI1	-1.12402	0.498732
CDKN3	-1.09958	0.4843
ENPEP	-1.13377	0.636116
PANX1	-1.02566	0.611422
AKR1C3	-1.07831	0.66537
PSMB10	0.96033	-1.24017
STK3	-1.14034	1.15991
HDAC2	-1.08948	1.26792
PLD2	1.28138	-1.04928
ITGA4	1.42308	-1.13452
PKN2	1.68075	-1.09799
SLC18A2	4.22204	-1.15898
RPS6KB1	5.7571	-2.4281
