# Supplementary material
Source: Research Square preprint supplement (doi:10.21203/rs.3.rs-8902045/v1)
Supplement: Supplementary file 4 [file 77d07997eba63c0039851ea3.xlsx]

## Sheet: Legend
Sheet	Legend
hBRCA-KO	Human BRCA CRISPR KO library sgRNAs
Group	Group detail in hBRCA-KO screen
Count	Count for each sgRNA in hBRCA-KO screen
Rank	Rank for 104 high-confidence functional metastasis genes in screens
Score	β Score for each gene in hBRCA-KO screens
sLib	subLib-hMeta library sgRNAs

## Sheet: hBRCA-KO
sgRNA	Gene	ID	Sequence
sg000055	AADAC	chr3_151824781.0_151824800.0	GTATTTCTGGAGATAGTGC
sg000056	AADAC	chr3_151824707.0_151824726.0	TGTATATAATGCCTTAAGG
sg000057	AADAC	chr3_151827689.0_151827708.0	TTTCTATCCAAATCACTCA
sg000058	AADAC	chr3_151817522.0_151817541.0	AGTCTGAAGCACTAAGAAG
sg000059	AADAC	chr3_151817523.0_151817542.0	GTCTGAAGCACTAAGAAGG
sg000060	AADAC	chr3_151827644.0_151827663.0	ACGGTAAATCTACATCAAG
sg000193	ABCA10	chr17_69182770.0_69182789.0	ACACTTCAGTGAATGCACG
sg000194	ABCA10	chr17_69215964.0_69215983.0	CCTTATTAAAACACTCATG
sg000195	ABCA10	chr17_69193944.0_69193963.0	CTCTCTGAAATAACTGACA
sg000196	ABCA10	chr17_69193140.0_69193159.0	GGTACTGAAGAGGATAAGT
sg000197	ABCA10	chr17_69150031.0_69150050.0	ATGGCGTATAAGTTACCTG
sg000198	ABCA10	chr17_69154241.0_69154260.0	GGTGCACAAAGCCAACTGC
sg000235	ABCA6	chr17_69133842.0_69133861.0	ACCAATCACCCTGTGATGG
sg000236	ABCA6	chr17_69136214.0_69136233.0	GCACCAAATAAAACACACA
sg000237	ABCA6	chr17_69124969.0_69124988.0	TGTATATGAGTCTCCTGAA
sg000238	ABCA6	chr17_69106111.0_69106130.0	AGACAGCTGTGAGTGACAT
sg000239	ABCA6	chr17_69081113.0_69081132.0	TTAACCTATAAGCTGCCCG
sg000240	ABCA6	chr17_69106086.0_69106105.0	AAAGACTTGCATTCTCCAG
sg000247	ABCA8	chr17_68929144.0_68929163.0	ACACCCCCAAAAGACAGTG
sg000248	ABCA8	chr17_68907789.0_68907808.0	AATTATCAGCCAAAAGCGA
sg000249	ABCA8	chr17_68932343.0_68932362.0	TGTTAATGTCACAAGAGAG
sg000250	ABCA8	chr17_68903349.0_68903368.0	CAAATCTGCGCAATTGCAA
sg000251	ABCA8	chr17_68929147.0_68929166.0	CCCCCAAAAGACAGTGAGG
sg000252	ABCA8	chr17_68924824.0_68924843.0	AGGACTTCAGGAAAAACAA
sg000253	ABCA9	chr17_69021827.0_69021846.0	TTGATAGATGTTCTAACCA
sg000254	ABCA9	chr17_69026461.0_69026480.0	TATTTCTAACTAGACAGGA
sg000255	ABCA9	chr17_69018499.0_69018518.0	TATCAGAAAAGTTACCCGT
sg000256	ABCA9	chr17_69045322.0_69045341.0	GGCAGGAAGAACAATCATG
sg000257	ABCA9	chr17_69026978.0_69026997.0	GATGAGGCTGACATTCTGG
sg000258	ABCA9	chr17_69035246.0_69035265.0	TGGGCCATCCCAACAGTGA
sg000283	ABCB5	chr7_20647592.0_20647611.0	AAACCTTCGCAATAGCCCG
sg000284	ABCB5	chr7_20681510.0_20681529.0	AAAGGTCGGACTACAATCG
sg000285	ABCB5	chr7_20651407.0_20651426.0	TTGGATTGGCAGATCATGG
sg000286	ABCB5	chr7_20643576.0_20643595.0	GACGTGGATAGAGTCACTA
sg000287	ABCB5	chr7_20658530.0_20658549.0	AAGGAGCTCAAATGAGTGG
sg000288	ABCB5	chr7_20628764.0_20628783.0	AACCAGTGGCATTAAAGGA
sg000385	ABCD2	chr12_39619121.0_39619140.0	CTTATTGCACTGTTGACGA
sg000386	ABCD2	chr12_39607622.0_39607641.0	TGGAGCTGATGCTATTGAA
sg000387	ABCD2	chr12_39618981.0_39619000.0	CCTGACCAATCTCTTACGG
sg000388	ABCD2	chr12_39604773.0_39604792.0	TTACCTCTCAGTGACACAT
sg000389	ABCD2	chr12_39573704.0_39573723.0	GAAACACTTACCAAAGAGA
sg000390	ABCD2	chr12_39603934.0_39603953.0	ACACCAGCAGGAGAAGTGG
sg000595	ABI3BP	chr3_100796429.0_100796448.0	CCTCATAAACCATACCCTG
sg000596	ABI3BP	chr3_100851876.0_100851895.0	AGATATCAGATTCCTACAC
sg000597	ABI3BP	chr3_100848851.0_100848870.0	GGATAGATGTAGTTTGCTG
sg000598	ABI3BP	chr3_100864853.0_100864872.0	CTAATGCACTAGACGTAGT
sg000599	ABI3BP	chr3_100874910.0_100874929.0	AAGACCTGGAATAATAAGG
sg000600	ABI3BP	chr3_100993331.0_100993350.0	GAAGTATTACACTAGCCCT
sg000691	ACACB	chr12_109235323.0_109235342.0	TCGGAGTCCATAATCCACA
sg000692	ACACB	chr12_109191711.0_109191730.0	CAACGACATCGACACCGGG
sg000693	ACACB	chr12_109166949.0_109166968.0	AAGCGTGTGACAAACTCAG
sg000694	ACACB	chr12_109179268.0_109179287.0	AACTCGAATATGGCCAGCG
sg000695	ACACB	chr12_109168010.0_109168029.0	TTGGCCTTAAGGTCCTCGG
sg000696	ACACB	chr12_109232718.0_109232737.0	CAGAGCTCTTCATGGACAG
sg000721	ACADL	chr2_210220638.0_210220657.0	CCACTTACTCTGAGTGATG
sg000722	ACADL	chr2_210205633.0_210205652.0	AAAATGGGATTAAAAGCCC
sg000723	ACADL	chr2_210217967.0_210217986.0	TCCTCCCAGACAATAGCTG
sg000724	ACADL	chr2_210205698.0_210205717.0	AGAAAAAGGCTAATACCAT
sg000725	ACADL	chr2_210205704.0_210205723.0	AGGCTAATACCATGGGCAG
sg000726	ACADL	chr2_210195213.0_210195232.0	TATTTCGCCATGCAAGCAG
sg000877	ACKR1	chr1_159205527.0_159205546.0	AAGGAATCATTCACACCAT
sg000878	ACKR1	chr1_159205644.0_159205663.0	GCTAGGATACCCAGGACAC
sg000879	ACKR1	chr1_159206088.0_159206107.0	AATGGCAACAAGACAAAGA
sg000880	ACKR1	chr1_159206021.0_159206040.0	TGCACCCTGATATACAGCA
sg000881	ACKR1	chr1_159206350.0_159206369.0	CTGGTGGCAGAATAGGGCG
sg000882	ACKR1	chr1_159205440.0_159205459.0	TGGAGGACATACCCAGAGG
sg001148	ACSM5	chr16_20429747.0_20429766.0	TGGAAACACCAGACTGGTG
sg001149	ACSM5	chr16_20418243.0_20418262.0	GGTCAGTGTGGCTTGCATG
sg001150	ACSM5	chr16_20421318.0_20421337.0	TTTACCAGCGGAACCACCG
sg001151	ACSM5	chr16_20424042.0_20424061.0	TAACTTTGGCATCAACTCG
sg001152	ACSM5	chr16_20418086.0_20418105.0	GTGCCATTGACCCACCAGA
sg001153	ACSM5	chr16_20418248.0_20418267.0	GTGTGGCTTGCATGCGGAC
sg001214	ACTG2	chr2_73913634.0_73913653.0	TGGATACCTGTGGTCACAA
sg001215	ACTG2	chr2_73914782.0_73914801.0	GAGCTATGAGCTGCCAGAT
sg001216	ACTG2	chr2_73902445.0_73902464.0	GATGATGCCGTGTTCAATG
sg001217	ACTG2	chr2_73908683.0_73908702.0	CAGCTCATTGTAGAAGGAG
sg001218	ACTG2	chr2_73902380.0_73902399.0	CAGAAAGACAGCTATGTGG
sg001219	ACTG2	chr2_73901330.0_73901349.0	TTGTCACACACGAGCGCGG
sg001374	ACVR1C	chr2_157550241.0_157550260.0	CAAGATCTTTCATCTCTGG
sg001375	ACVR1C	chr2_157550365.0_157550384.0	TTGTCCTTTGAACCAACAG
sg001376	ACVR1C	chr2_157556207.0_157556226.0	GTAGGAGCACTGTCGACCC
sg001377	ACVR1C	chr2_157544485.0_157544504.0	TGGCGCTCTCAATTGCTAG
sg001378	ACVR1C	chr2_157538587.0_157538606.0	ACCAAGTATCCCAAACCAG
sg001379	ACVR1C	chr2_157544522.0_157544541.0	AATAGAAATATAGTGACCG
sg001542	ADAM33	chr20_3672209.0_3672228.0	ACAGGGTGAGCCGTCCAGT
sg001543	ADAM33	chr20_3674594.0_3674613.0	TCCATCCGAAAGATCTCGT
sg001544	ADAM33	chr20_3675072.0_3675091.0	TGGGTTTCTATGTATCCTG
sg001545	ADAM33	chr20_3671278.0_3671297.0	CTGGCTTGTCACAGAAGGG
sg001546	ADAM33	chr20_3673582.0_3673601.0	GCCTCCCGAGCTCTCGGCG
sg001547	ADAM33	chr20_3668950.0_3668969.0	AGGAGCTACCTCTCACCAG
sg001656	ADAMTS5	chr21_26954776.0_26954795.0	GTGCTGTGATTGAAGACGA
sg001657	ADAMTS5	chr21_26965985.0_26966004.0	TGCTTCTATCGGGGCACAG
sg001658	ADAMTS5	chr21_26966146.0_26966165.0	ACATCGACCAACTCTACTC
sg001659	ADAMTS5	chr21_26965804.0_26965823.0	TGCACGTCTACACCCGCGA
sg001660	ADAMTS5	chr21_26924388.0_26924407.0	ATGCAGGAAGTCATCCCTG
sg001661	ADAMTS5	chr21_26934530.0_26934549.0	AAGGCGTCCCTTCCACCGC
sg001668	ADAMTS7	chr15_78766673.0_78766692.0	CCCGTAGGACAGATCCTCG
sg001669	ADAMTS7	chr15_78800387.0_78800406.0	TCTACGAGCTACAATACCG
sg001670	ADAMTS7	chr15_78777512.0_78777531.0	GACGCCAGGTGGCACCGAG
sg001671	ADAMTS7	chr15_78790715.0_78790734.0	AAAAGCATCAACATGAAGG
sg001672	ADAMTS7	chr15_78788235.0_78788254.0	GAACCTGGTGATATACTGG
sg001673	ADAMTS7	chr15_78762535.0_78762554.0	CTGGACACCACCACCACAG
sg001820	ADCY5	chr3_123314223.0_123314242.0	GCTACACTCACCTTTACGC
sg001821	ADCY5	chr3_123447860.0_123447879.0	GCCGCTCCAGTTTGTCCGA
sg001822	ADCY5	chr3_123328733.0_123328752.0	ACAGCGGGCGAGTACACTG
sg001823	ADCY5	chr3_123448294.0_123448313.0	ACGACGATCCTCCGCTGAG
sg001824	ADCY5	chr3_123347830.0_123347849.0	GACATCAACGCCAAGCAGG
sg001825	ADCY5	chr3_123291328.0_123291347.0	GCTGCAGGCCTACAACCGG
sg001856	ADCYAP1R1	chr7_31078077.0_31078096.0	GAATCTTCAACCCAGACCA
sg001857	ADCYAP1R1	chr7_31084151.0_31084170.0	GTGAGCCGGAACTGCACGG
sg001858	ADCYAP1R1	chr7_31078003.0_31078022.0	GTGGGACAACATCACGTGT
sg001859	ADCYAP1R1	chr7_31084223.0_31084242.0	GAATATGAATCTGAGACTG
sg001860	ADCYAP1R1	chr7_31087641.0_31087660.0	TGACAGCACAGCTCTGTGG
sg001861	ADCYAP1R1	chr7_31086415.0_31086434.0	GTTGGACACAACACAGTAG
sg002000	ADGRG4	chrX_136346315.0_136346334.0	GACAGACGAATCAGCACAA
sg002001	ADGRG4	chrX_136347100.0_136347119.0	GGGGTTACTGTATCAACTG
sg002002	ADGRG4	chrX_136349479.0_136349498.0	GATACTAGACCAGTCTGAG
sg002003	ADGRG4	chrX_136347572.0_136347591.0	TTCCAAAGATGGAGTACCC
sg002004	ADGRG4	chrX_136347460.0_136347479.0	TTGTCGGAAGATAAGACAG
sg002005	ADGRG4	chrX_136349763.0_136349782.0	CATTAGATACAGTTGCCGG
sg002036	ADGRL3	chr4_61948160.0_61948179.0	CAGGTTATTGGTCAACACA
sg002037	ADGRL3	chr4_61733133.0_61733152.0	GGCAAATCTGACATAGACC
sg002038	ADGRL3	chr4_61892706.0_61892725.0	AAAGTTGTGGTCCGAAGGG
sg002039	ADGRL3	chr4_61587401.0_61587420.0	GGCATCTGGCAGATAACAT
sg002040	ADGRL3	chr4_62044528.0_62044547.0	GTTCAGCGTCACTCAACAG
sg002041	ADGRL3	chr4_61733116.0_61733135.0	CCTCCCCATCGGTAAGGGG
sg002054	ADH1A	chr4_99284453.0_99284472.0	CAGACTTTCTCTAGAGGCG
sg002055	ADH1A	chr4_99286934.0_99286953.0	CATGGTACCACTAACCACG
sg002056	ADH1A	chr4_99284768.0_99284787.0	ACACTGAGGAATAGCGAGT
sg002057	ADH1A	chr4_99284602.0_99284621.0	CAGTGTAAGCAATCCTCAG
sg002058	ADH1A	chr4_99286908.0_99286927.0	CCTAAAATCACAGGAAGTG
sg002059	ADH1A	chr4_99286951.0_99286970.0	TGTGGCACAGATGACCACG
sg002060	ADH1B	chr4_99315899.0_99315918.0	TCTGCAGTTAACGTTGCCA
sg002061	ADH1B	chr4_99316010.0_99316029.0	ACCTTCTCCCAGTACACGG
sg002062	ADH1B	chr4_99318147.0_99318166.0	TGTCACACAGATGACCACG
sg002063	ADH1B	chr4_99313984.0_99314003.0	GGAGCAGCCAGAATCATTG
sg002064	ADH1B	chr4_99318130.0_99318149.0	CAGGTTGCCACTAACCACG
sg002065	ADH1B	chr4_99315928.0_99315947.0	TTGGCTGTGGATTCTCGAC
sg002066	ADH1C	chr4_99347767.0_99347786.0	GTAGAGGTTGCACCTCCTA
sg002067	ADH1C	chr4_99342955.0_99342974.0	GCAGCCAGAATCATTGCTG
sg002068	ADH1C	chr4_99344974.0_99344993.0	ACCTTCTCCCAGTACACAG
sg002069	ADH1C	chr4_99343046.0_99343065.0	GAAAACATAGGTCACCCCA
sg002070	ADH1C	chr4_99345012.0_99345031.0	TGGATGGGCTTCCCGCTGC
sg002071	ADH1C	chr4_99344993.0_99345012.0	GCTGACGCCGACGAAGTGG
sg002072	ADH4	chr4_99139067.0_99139086.0	TCCCACACAAATTTGTGAG
sg002073	ADH4	chr4_99141629.0_99141648.0	AATTTAGAATCGATAACAG
sg002074	ADH4	chr4_99136578.0_99136597.0	ACATTCTCTCAGTACACTG
sg002075	ADH4	chr4_99142716.0_99142735.0	CAACCTCTTCAATGCAAAG
sg002076	ADH4	chr4_99131738.0_99131757.0	ACAGCACAAGTCGAACCAG
sg002077	ADH4	chr4_99131687.0_99131706.0	TAATGGGTTGTAAAGCAGC
sg002114	ADIPOQ	chr3_186854408.0_186854427.0	TTGCAGTGGAATTTACCAG
sg002115	ADIPOQ	chr3_186853113.0_186853132.0	AAACCACGACTCAAGGGCC
sg002116	ADIPOQ	chr3_186854300.0_186854319.0	ACCGCTCAGCATTCAGTGT
sg002117	ADIPOQ	chr3_186854242.0_186854261.0	GGATTCCCGGAAAGCCTCG
sg002118	ADIPOQ	chr3_186854189.0_186854208.0	TTGGTCCTAAGGGAGACAT
sg002119	ADIPOQ	chr3_186854381.0_186854400.0	ATCAGCAAAACCACTATGA
sg002234	ADRA1A	chr8_26864192.0_26864211.0	CAAGACGCACTTCTCAGTG
sg002235	ADRA1A	chr8_26864290.0_26864309.0	GGCCTCAAGACCGACAAGT
sg002236	ADRA1A	chr8_26864487.0_26864506.0	GGTCCAATGGATATGACCA
sg002237	ADRA1A	chr8_26864670.0_26864689.0	TTGCAGAAGACCCTGCCGA
sg002238	ADRA1A	chr8_26864341.0_26864360.0	TACTGCCGCGTCTACGTGG
sg002239	ADRA1A	chr8_26864333.0_26864352.0	CGTCTACGTGGTGGCCAAG
sg002276	ADRB2	chr5_148826896.0_148826915.0	CCTTTCCTGCGTGACGTCG
sg002277	ADRB2	chr5_148827444.0_148827463.0	GGAACGTAGAAGGACACGA
sg002278	ADRB2	chr5_148827201.0_148827220.0	TCCACTGCGATCACGCACA
sg002279	ADRB2	chr5_148827464.0_148827483.0	CGAAGACCATGATCACCAG
sg002280	ADRB2	chr5_148827060.0_148827079.0	CCCATGACCAGATCAGCAC
sg002281	ADRB2	chr5_148827801.0_148827820.0	GGGCTCCGGCAGTAGATAA
sg002410	AFP	chr4_73442407.0_73442426.0	GTTGAATGCTTCCAAACAA
sg002411	AFP	chr4_73447537.0_73447556.0	CATTGACCACGTTCCAGCG
sg002412	AFP	chr4_73438193.0_73438212.0	GTGGCTTCTTGAACAAACT
sg002413	AFP	chr4_73442326.0_73442345.0	TTGTAGGTGCATACAGGAA
sg002414	AFP	chr4_73453786.0_73453805.0	CAAAAGCCACAAATAACAG
sg002415	AFP	chr4_73450655.0_73450674.0	ATGGCCATCAGCTCCGACG
sg002546	AGMO	chr7_15418598.0_15418617.0	GATGAACAGCATATACTGA
sg002547	AGMO	chr7_15387481.0_15387500.0	TTATTGAAGAATCCAGGTG
sg002548	AGMO	chr7_15544766.0_15544785.0	CTTACCATGAGCCATACGA
sg002549	AGMO	chr7_15561751.0_15561770.0	TTTGGAATGAAGTTTCACT
sg002550	AGMO	chr7_15365570.0_15365589.0	CATTAAGAACATCAAGCAA
sg002551	AGMO	chr7_15431004.0_15431023.0	CCAGGAAGTATATATCTGG
sg002624	AGRN	chr1_1048022.0_1048041.0	TGGCCCCCGTGATAAACGC
sg002625	AGRN	chr1_1043436.0_1043455.0	TGGCGCGCAAAGGACCCTG
sg002626	AGRN	chr1_1044399.0_1044418.0	CAGCGAGGGCTCTACGTAG
sg002627	AGRN	chr1_1046681.0_1046700.0	GCAGCGATGAGGAACTGAG
sg002628	AGRN	chr1_1051276.0_1051295.0	AAGGAGCCGCTCTACGTAG
sg002629	AGRN	chr1_1048263.0_1048282.0	CACAGCCCTGCTTCCACGG
sg002890	AK5	chr1_77340474.0_77340493.0	CAATGTAAAAGCTACCCAA
sg002891	AK5	chr1_77417656.0_77417675.0	CTTCGATGATATTGGACAC
sg002892	AK5	chr1_77293805.0_77293824.0	CTCAAACTTTCCATATCGG
sg002893	AK5	chr1_77340386.0_77340405.0	AGGAATACCACCAAATCGG
sg002894	AK5	chr1_77340387.0_77340406.0	CAGGAATACCACCAAATCG
sg002895	AK5	chr1_77287007.0_77287026.0	AAAAAGTAAAGGAACTGGG
sg003010	AKAP9	chr7_92042165.0_92042184.0	AACAGCAGTACGCAAACAC
sg003011	AKAP9	chr7_92001600.0_92001619.0	CATAAGTCCCTTAGTACAG
sg003012	AKAP9	chr7_92029932.0_92029951.0	CACAGAGAACAATGTACCC
sg003013	AKAP9	chr7_92002911.0_92002930.0	ATCATTATTAACCACAACA
sg003014	AKAP9	chr7_91994636.0_91994655.0	CTGCCATTAAACAAAGAGA
sg003015	AKAP9	chr7_92084872.0_92084891.0	ACATAGCATCAGAAGGCCG
sg003070	AKR1C1	chr10_4967012.0_4967031.0	TGGAAAATGAATAAGGTAG
sg003071	AKR1C1	chr10_4965969.0_4965988.0	ATGAGCAGAATCAATATGG
sg003072	AKR1C1	chr10_4963507.0_4963526.0	GGCACCTATGCGCCTGCAG
sg003073	AKR1C1	chr10_4968378.0_4968397.0	CAAACACTCACCTCCCATG
sg003074	AKR1C1	chr10_4968865.0_4968884.0	GGTGTCCAACTTCAACCGC
sg003075	AKR1C1	chr10_4968895.0_4968914.0	GATGATCCTCAACAAGCCA
sg003076	AKR1C2	chr10_5000561.0_5000580.0	TGGAAAATGAATAAGATAG
sg003077	AKR1C2	chr10_5001606.0_5001625.0	ATGTGCAGAATCAATATGG
sg003078	AKR1C2	chr10_4998666.0_4998685.0	GATCATCTCCAGCAGCCTG
sg003079	AKR1C2	chr10_4999204.0_4999223.0	GTGGATCTCTGTGCCACAT
sg003080	AKR1C2	chr10_4998617.0_4998636.0	CGCTCACCTGGTTGCAGAC
sg003081	AKR1C2	chr10_5001587.0_5001606.0	GTTTACAATAATGAGGAGC
sg003166	ALB	chr4_73408627.0_73408646.0	CAACTCTTCGTGAAACCTA
sg003167	ALB	chr4_73413628.0_73413647.0	CTTATCTACTTACATGCCC
sg003168	ALB	chr4_73415146.0_73415165.0	CTTTGGCATAGCATTCATG
sg003169	ALB	chr4_73415150.0_73415169.0	AATGCTATGCCAAAGTGGT
sg003170	ALB	chr4_73412062.0_73412081.0	GATCTTACCAAAGTCCACA
sg003171	ALB	chr4_73415135.0_73415154.0	CATTCATGAGGATCTGCAG
sg003196	ALDH1A2	chr15_57992787.0_57992806.0	AAATATTGATGACCCCGGG
sg003197	ALDH1A2	chr15_58010683.0_58010702.0	CAGCCTGCGTAATATCGAA
sg003198	ALDH1A2	chr15_57964022.0_57964041.0	TTGATTGAAGAACACACCC
sg003199	ALDH1A2	chr15_58065544.0_58065563.0	TAATTTCGAGATTGGGCGT
sg003200	ALDH1A2	chr15_57992706.0_57992725.0	GCATTCACAGGGTCTACTG
sg003201	ALDH1A2	chr15_57962013.0_57962032.0	ATGCGGATTGCCAAGGAGG
sg003214	ALDH1L1	chr3_126135578.0_126135597.0	TGCCTTTGAGAATGGACGG
sg003215	ALDH1L1	chr3_126125681.0_126125700.0	CATCAGGGGATAGTTCCAG
sg003216	ALDH1L1	chr3_126131438.0_126131457.0	TGGCCCTGAAGACCCACGT
sg003217	ALDH1L1	chr3_126154636.0_126154655.0	TGCTCCCCACAGATCAACT
sg003218	ALDH1L1	chr3_126150506.0_126150525.0	GTGAAGAATATTCAGCTGG
sg003219	ALDH1L1	chr3_126118029.0_126118048.0	GGGTTCACAGGCTCCACAG
sg003232	ALDH3A1	chr17_19743420.0_19743439.0	GAGGTGGTGTACGTCCTAG
sg003233	ALDH3A1	chr17_19742037.0_19742056.0	GGGAAGAGTCCCTGCTACG
sg003234	ALDH3A1	chr17_19742189.0_19742208.0	TGTACCCAGTAATCAATGG
sg003235	ALDH3A1	chr17_19740328.0_19740347.0	CACGCACCTATGTAGCGAG
sg003236	ALDH3A1	chr17_19739060.0_19739079.0	TTGCAGAGACATCCAGTGG
sg003237	ALDH3A1	chr17_19745038.0_19745057.0	TTCCGGATCCAGCAGCTGG
sg003584	ALX4	chr11_44309683.0_44309702.0	CTCGCTGCAAGTAAAGATG
sg003585	ALX4	chr11_44275395.0_44275414.0	CTACCCAGACGTGTATGCG
sg003586	ALX4	chr11_44309917.0_44309936.0	TTCGGCACAACTTTCCTGT
sg003587	ALX4	chr11_44275604.0_44275623.0	CCACAGTGTCAGAGTCAGG
sg003588	ALX4	chr11_44264876.0_44264895.0	AAGGCCAAGGAGCACAGTG
sg003589	ALX4	chr11_44275482.0_44275501.0	GAGCAACAAGGGCAAGAAG
sg003918	ANGPT4	chr20_881198.0_881217.0	TGGATGGTGTAGACACCAC
sg003919	ANGPT4	chr20_885196.0_885215.0	CCCTCACCAACATCGAGCG
sg003920	ANGPT4	chr20_890270.0_890289.0	GTGCCCAGCTCTAGCATGG
sg003921	ANGPT4	chr20_888315.0_888334.0	CTTCAGGGCCAAAACAGGT
sg003922	ANGPT4	chr20_890220.0_890239.0	CGCAAGCTGACCGACATGG
sg003923	ANGPT4	chr20_878284.0_878303.0	CACTGGCTGGGCAATGAAG
sg003924	ANGPTL1	chr1_178853663.0_178853682.0	AAAACAGTTTGGACCCTGG
sg003925	ANGPTL1	chr1_178865055.0_178865074.0	GGAGGTAACGAGATTCAGA
sg003926	ANGPTL1	chr1_178865259.0_178865278.0	AAGATGGCAACAAGATACA
sg003927	ANGPTL1	chr1_178865593.0_178865612.0	ACCTGAACAAAGAATAACA
sg003928	ANGPTL1	chr1_178865463.0_178865482.0	ATAGATGTTCTGCAACTGG
sg003929	ANGPTL1	chr1_178865734.0_178865753.0	TAGGAAGAATAGCACACCT
sg003948	ANGPTL5	chr11_101905744.0_101905763.0	TGATTAGATAAATAATCCA
sg003949	ANGPTL5	chr11_101900524.0_101900543.0	GTGACATGGATTACAGAGG
sg003950	ANGPTL5	chr11_101902666.0_101902685.0	CTGTCACCAAAACACCGAG
sg003951	ANGPTL5	chr11_101907815.0_101907834.0	AACTGTGTACATCATTCTA
sg003952	ANGPTL5	chr11_101900527.0_101900546.0	TGTGTGACATGGATTACAG
sg003953	ANGPTL5	chr11_101900454.0_101900473.0	ATAATCACACCACAACCTC
sg003960	ANGPTL7	chr1_11189699.0_11189718.0	AAAGCGGCCAACTGCTGTG
sg003961	ANGPTL7	chr1_11193661.0_11193680.0	ACTGGAAGCAGTACAAGCA
sg003962	ANGPTL7	chr1_11189632.0_11189651.0	CTTTGTCAGCCACCCAGCG
sg003963	ANGPTL7	chr1_11189789.0_11189808.0	GAGAGGGACTGGGTCAGCG
sg003964	ANGPTL7	chr1_11193586.0_11193605.0	GTGACATGGAGACTTCAGG
sg003965	ANGPTL7	chr1_11193644.0_11193663.0	GTCCCGGTAGAAGGAGACA
sg003972	ANK1	chr8_41733972.0_41733991.0	ATTCTAGAAACGACAACCA
sg003973	ANK1	chr8_41706159.0_41706178.0	ATCAAACACGGCGTCATGG
sg003974	ANK1	chr8_41694717.0_41694736.0	GTACTTCGTGATCATGTCA
sg003975	ANK1	chr8_41718116.0_41718135.0	ACGGGAGCCTCGATCGACG
sg003976	ANK1	chr8_41664933.0_41664952.0	CGTGATGCACATTGTCAGG
sg003977	ANK1	chr8_41715034.0_41715053.0	GTGGCGGCCAAGTACGGGA
sg003984	ANK3	chr10_60108953.0_60108972.0	GGGCCGTACACTTGCGTGG
sg003985	ANK3	chr10_60075260.0_60075279.0	ATGAAGTTCGACTGAAGTG
sg003986	ANK3	chr10_60073199.0_60073218.0	ATGTGGATGCGCTTTACTG
sg003987	ANK3	chr10_60173163.0_60173182.0	GATACACACCACTGCATGT
sg003988	ANK3	chr10_60073183.0_60073202.0	CTGAGGACAGATTAGACAG
sg003989	ANK3	chr10_60059954.0_60059973.0	GTGTAGTGCAACCCTGTGG
sg004349	ANKRD53	chr2_70979723.0_70979742.0	GAGGAGTACAAGTTTCCCG
sg004350	ANKRD53	chr2_70978784.0_70978803.0	GACTCCGCGTCAGTCCAGG
sg004351	ANKRD53	chr2_70979217.0_70979236.0	CAGACGGCAATCGACCAGA
sg004352	ANKRD53	chr2_70979250.0_70979269.0	TACTACCAGCTGTTCGCAG
sg004353	ANKRD53	chr2_70982592.0_70982611.0	ATGTGGAAAAAGGACAAGA
sg004354	ANKRD53	chr2_70979789.0_70979808.0	CACAGGGACAACACCACCG
sg004487	ANO3	chr11_26525640.0_26525659.0	ATGCTATTACACTGACGGG
sg004488	ANO3	chr11_26634207.0_26634226.0	TCCTCGAACAGAATCAGAG
sg004489	ANO3	chr11_26599593.0_26599612.0	CTGTTCCATGACAACCAGG
sg004490	ANO3	chr11_26542000.0_26542019.0	CATCTATTATATGAGCGCT
sg004491	ANO3	chr11_26647826.0_26647845.0	TTCTACATGATTTGCACAG
sg004492	ANO3	chr11_26553287.0_26553306.0	GCAGTTCTTGTCACAGAGA
sg004691	AOC3	chr17_42852674.0_42852693.0	GTGCGAGTAGAGATCTGAG
sg004692	AOC3	chr17_42852813.0_42852832.0	GCCACGGGCTACATCAGCT
sg004693	AOC3	chr17_42851935.0_42851954.0	GTTGCTTCTACAAGCACCG
sg004694	AOC3	chr17_42852525.0_42852544.0	ACCACGCCCCTGACCCGTG
sg004695	AOC3	chr17_42855523.0_42855542.0	TCACTGAAATCCACAGTGG
sg004696	AOC3	chr17_42852817.0_42852836.0	GCCGAGCTGATGTAGCCCG
sg004925	APC	chr5_112839455.0_112839474.0	GGATGTAATCAGACGACAC
sg004926	APC	chr5_112840126.0_112840145.0	CTGTATAAATGGCTCATCG
sg004927	APC	chr5_112841123.0_112841142.0	CAATAGGCGTGTAATGATG
sg004928	APC	chr5_112838919.0_112838938.0	GTTCAGAAACAAATCGAGT
sg004929	APC	chr5_112837679.0_112837698.0	GAAGCATTATGGGACATGG
sg004930	APC	chr5_112835092.0_112835111.0	TAGCCATTATTGAAAGTGG
sg005071	APOB	chr2_21009829.0_21009848.0	AGTCCATGAGTTAATCGAG
sg005072	APOB	chr2_21032346.0_21032365.0	AACTCACTTGTTGACCGCG
sg005073	APOB	chr2_21015091.0_21015110.0	ACATGACTTTCCGGCACGT
sg005074	APOB	chr2_21006648.0_21006667.0	CTGAGCAACAAATTTGTGG
sg005075	APOB	chr2_21008871.0_21008890.0	CAAAGTCAATTGTAAAGGA
sg005076	APOB	chr2_21008298.0_21008317.0	GAGGGAAAATCAAACACAG
sg005167	APOD	chr3_195571338.0_195571357.0	GAACTGTGAATCAAATCGA
sg005168	APOD	chr3_195573859.0_195573878.0	AAGATCAAAGTGTTAAACC
sg005169	APOD	chr3_195569108.0_195569127.0	GGATCCAGTACGGTGCCGA
sg005170	APOD	chr3_195573959.0_195573978.0	TCTGCAGTATCTCGGAAGA
sg005171	APOD	chr3_195568982.0_195569001.0	GAGAGTCCACTGTTTCTGG
sg005172	APOD	chr3_195579349.0_195579368.0	CAAAATTCTCCTGCACCGG
sg005353	AQP7	chr9_33385746.0_33385765.0	CACCCCGATGATGACCACG
sg005354	AQP7	chr9_33386495.0_33386514.0	CCCAGCGCACAGTTAGCAA
sg005355	AQP7	chr9_33395131.0_33395150.0	GATCCAGGAAATACTGCAG
sg005356	AQP7	chr9_33386433.0_33386452.0	TTCCTGGGCTCCTTCCTGG
sg005357	AQP7	chr9_33386405.0_33386424.0	TAGAAGAGACTGTAGATGG
sg005358	AQP7	chr9_33386473.0_33386492.0	AAACTTCCTCCAGGGCACG
sg005377	AR	chrX_67545686.0_67545705.0	CTTAAAGACATCCTGAGCG
sg005378	AR	chrX_67545523.0_67545542.0	GACGCAACCTCTCTCGGGG
sg005379	AR	chrX_67546641.0_67546660.0	GGGTACCACACATCAGGTG
sg005380	AR	chrX_67546295.0_67546314.0	CCAGCTTGATGCGAGCGTG
sg005381	AR	chrX_67545905.0_67545924.0	TTGGAGCATCTGAGTCCAG
sg005382	AR	chrX_67546068.0_67546087.0	AGTATTCCCCTTTCAAGGG
sg005593	ARHGAP20	chr11_110592043.0_110592062.0	CGCCAACATCACCTATGCC
sg005594	ARHGAP20	chr11_110583692.0_110583711.0	TACCTTAGGAGAACAACAT
sg005595	ARHGAP20	chr11_110580935.0_110580954.0	GTACACAAAGATCCCACTG
sg005596	ARHGAP20	chr11_110606626.0_110606645.0	GGAGCTGTTCCATAAGGAA
sg005597	ARHGAP20	chr11_110581118.0_110581137.0	GGTAAAGAAACTTGGCCAG
sg005598	ARHGAP20	chr11_110630668.0_110630687.0	ATGCCGCTCCTGCCTCTGG
sg005683	ARHGAP36	chrX_131084990.0_131085009.0	GTCACGGAAAAACTCCTTG
sg005684	ARHGAP36	chrX_131083180.0_131083199.0	CTTATCCAAGGTGTTCGGA
sg005685	ARHGAP36	chrX_131083942.0_131083961.0	CACGGCGAGTGAACTCCCG
sg005686	ARHGAP36	chrX_131084652.0_131084671.0	CGCTGCACGGAGTATTCAA
sg005687	ARHGAP36	chrX_131083794.0_131083813.0	CAGTTCAAGATGCTTGCGG
sg005688	ARHGAP36	chrX_131086055.0_131086074.0	CCAGTTATCAATCATGGCA
sg005713	ARHGAP5	chr14_32093435.0_32093454.0	CAGTATCATCGGCAAACTG
sg005714	ARHGAP5	chr14_32090987.0_32091006.0	GCAAATTCGTACTCCGATG
sg005715	ARHGAP5	chr14_32093022.0_32093041.0	CTAAATGGATCTCCACACA
sg005716	ARHGAP5	chr14_32092623.0_32092642.0	CACCCATGTGGTTTAAAGG
sg005717	ARHGAP5	chr14_32091988.0_32092007.0	AATTCAATTCATTTCACCA
sg005718	ARHGAP5	chr14_32093783.0_32093802.0	CTGGTTTAGGTTTAATAGG
sg005911	ARID1A	chr1_26763184.0_26763203.0	ACATCCCTGACCCAACCTG
sg005912	ARID1A	chr1_26696998.0_26697017.0	AGCAGAACTCTCACGACCA
sg005913	ARID1A	chr1_26771227.0_26771246.0	TTGAATGCAAGATTGAACG
sg005914	ARID1A	chr1_26731177.0_26731196.0	CTGTTGACCATACCCGCTG
sg005915	ARID1A	chr1_26771262.0_26771281.0	CAGCTGCAAAGATGTCTGG
sg005916	ARID1A	chr1_26732722.0_26732741.0	AATGACCTCCAGTAAGGGA
sg005917	ARID1B	chr6_156829262.0_156829281.0	TGCCCATGCCATACAACTG
sg005918	ARID1B	chr6_156778608.0_156778627.0	TAATTATTAAACTCCGGGA
sg005919	ARID1B	chr6_157184341.0_157184360.0	GAGTGCAAGATCGAACGTG
sg005920	ARID1B	chr6_157084690.0_157084709.0	AGTTGCTTCCGTTCCCGTG
sg005921	ARID1B	chr6_157207306.0_157207325.0	ATGGTGTGCCCGTCTGCAG
sg005922	ARID1B	chr6_157184229.0_157184248.0	GGTTAATAAAAACAAGAAG
sg005923	ARID2	chr12_45817854.0_45817873.0	TTACTACTTGCTAATGCCG
sg005924	ARID2	chr12_45849649.0_45849668.0	GTGGTAGGAGTAAAACGGA
sg005925	ARID2	chr12_45850351.0_45850370.0	TGTTCAGAATCATAGTACA
sg005926	ARID2	chr12_45850674.0_45850693.0	GAAGTTGTTACATACTGTG
sg005927	ARID2	chr12_45891811.0_45891830.0	ATGCAGCAACTGAACATGG
sg005928	ARID2	chr12_45849595.0_45849614.0	CATACAGTGAAGAGAGTGG
sg006832	ASPA	chr17_3481620.0_3481639.0	TTTGCCATATGAAGTGAGA
sg006833	ASPA	chr17_3489232.0_3489251.0	AGGACCAACTTCTATACCT
sg006834	ASPA	chr17_3476239.0_3476258.0	AGTATTTCTGGTTAAGCAT
sg006835	ASPA	chr17_3481713.0_3481732.0	CAACACCACCTCTAACATG
sg006836	ASPA	chr17_3483546.0_3483565.0	TGGTCGCATATTTGAGGGA
sg006837	ASPA	chr17_3483513.0_3483532.0	GATAAACGTAGCAGGGTAG
sg006916	ASTN1	chr1_177024640.0_177024659.0	GACGTGAGAGGAGCACACG
sg006917	ASTN1	chr1_176965210.0_176965229.0	CTTACACAATATTTCAGCG
sg006918	ASTN1	chr1_177032789.0_177032808.0	GATGATCCTGTATACTCGC
sg006919	ASTN1	chr1_177032474.0_177032493.0	GGGCTGCAATGAAAAGTCG
sg006920	ASTN1	chr1_176949265.0_176949284.0	GTTCCGACGGCTTCAACGG
sg006921	ASTN1	chr1_176888103.0_176888122.0	CCATCAGCTCCAAAAGCAG
sg006932	ASXL1	chr20_32431320.0_32431339.0	GTCAAATGAAGCGCAACAG
sg006933	ASXL1	chr20_32434439.0_32434458.0	TTCACGTATCAAACCACCC
sg006934	ASXL1	chr20_32433369.0_32433388.0	AATCAGTGCGTATACAGCG
sg006935	ASXL1	chr20_32434762.0_32434781.0	TCTGACGTACACTTTCCAG
sg006936	ASXL1	chr20_32369027.0_32369046.0	TAGCATTGAGGCATGCGAG
sg006937	ASXL1	chr20_32369046.0_32369065.0	TGCTACATTCCAATTCAAG
sg007212	ATM	chr11_108244097.0_108244116.0	CAAGGCTATTCAGTGTGCG
sg007213	ATM	chr11_108272811.0_108272830.0	CATCACCAAGTTCGCATGT
sg007214	ATM	chr11_108299853.0_108299872.0	ACCTACCTGAATAACACAC
sg007215	ATM	chr11_108250791.0_108250810.0	CTACCCCAACAGCGACATG
sg007216	ATM	chr11_108335020.0_108335039.0	CAGAATTTCGCTTAGCAGG
sg007217	ATM	chr11_108268524.0_108268543.0	TAGGGCAGCTGATATTCGG
sg007242	ATOH8	chr2_85754505.0_85754524.0	AAGCAGCGTTTCCGCGCGT
sg007243	ATOH8	chr2_85754811.0_85754830.0	GGTCGTTTCCTAGGCGACG
sg007244	ATOH8	chr2_85754382.0_85754401.0	GGGACCGGCTGCAGCCGAT
sg007245	ATOH8	chr2_85754749.0_85754768.0	CGAGTAGGAACTTTCCCCG
sg007246	ATOH8	chr2_85754863.0_85754882.0	AGCCCTGCAGCAGACCCGG
sg007247	ATOH8	chr2_85764112.0_85764131.0	CACACACTCGGAGAAGCTG
sg007326	ATP13A5	chr3_193331119.0_193331138.0	TACTTTGTCAAAGCACACG
sg007327	ATP13A5	chr3_193319090.0_193319109.0	GTGCCCAAGAATTTCCCAC
sg007328	ATP13A5	chr3_193363311.0_193363330.0	CTTACAGGAAACTTCAGTG
sg007329	ATP13A5	chr3_193345050.0_193345069.0	GTTAAGCTGCATAACCTCG
sg007330	ATP13A5	chr3_193289891.0_193289910.0	GGTAGACCTCACAATACCA
sg007331	ATP13A5	chr3_193343924.0_193343943.0	TGAAGGCATGCTTACAGGT
sg007338	ATP1A2	chr1_160128804.0_160128823.0	TTCGACAACCAAATCCATG
sg007339	ATP1A2	chr1_160124402.0_160124421.0	ATGAGAAGAGATGATCCGG
sg007340	ATP1A2	chr1_160130459.0_160130478.0	CGGGGCTTCAAATTCGACA
sg007341	ATP1A2	chr1_160127603.0_160127622.0	TGAGGCGAGAGTAGCTATG
sg007342	ATP1A2	chr1_160135948.0_160135967.0	GGATGGTCACAGTGCCCAG
sg007343	ATP1A2	chr1_160139705.0_160139724.0	GAGGGCTACACCCATGCCT
sg007410	ATP2B3	chrX_153556390.0_153556409.0	CCCACCGACAAGCACACAC
sg007411	ATP2B3	chrX_153549599.0_153549618.0	TGGACCACGGTCATACGGT
sg007412	ATP2B3	chrX_153543087.0_153543106.0	GTCTGGGAATTCACGCCAA
sg007413	ATP2B3	chrX_153553051.0_153553070.0	ACAGCAATGGCGAACTCCG
sg007414	ATP2B3	chrX_153558243.0_153558262.0	CAACTGACGGTCAATGTGG
sg007415	ATP2B3	chrX_153536433.0_153536452.0	CTGAAGACCTCACCCACAG
sg007784	ATR	chr3_142519721.0_142519740.0	CCCAGGTCACCAATTGTGG
sg007785	ATR	chr3_142559252.0_142559271.0	ATGCTTTGATTTATATGCA
sg007786	ATR	chr3_142512342.0_142512361.0	TGTGTGAGATGGTCAAGCA
sg007787	ATR	chr3_142550217.0_142550236.0	GACGTGCGAAAACAAGATG
sg007788	ATR	chr3_142566200.0_142566219.0	AAATCAAGCAACATCACGG
sg007789	ATR	chr3_142566158.0_142566177.0	TTTACAAACATAAGTGGGG
sg007814	ATRX	chrX_77684215.0_77684234.0	ATTAGTGCGGAATAAGAGT
sg007815	ATRX	chrX_77693825.0_77693844.0	AAAATCTCAAAAAACGCGG
sg007816	ATRX	chrX_77634603.0_77634622.0	TTACCAAGGCCCATACAGT
sg007817	ATRX	chrX_77682942.0_77682961.0	TGATTTAAAGACTCAGGCG
sg007818	ATRX	chrX_77522264.0_77522283.0	ATGAGTAATCAACAGCTGG
sg007819	ATRX	chrX_77557566.0_77557585.0	GTTGTTGATCAGCAGCAGG
sg007982	AVPR2	chrX_153906157.0_153906176.0	AGGCGGCGATACCCAGGGT
sg007983	AVPR2	chrX_153905944.0_153905963.0	GCGTACCGCCATGGAAGTG
sg007984	AVPR2	chrX_153905725.0_153905744.0	GGCCAATGAAGACGTGTAT
sg007985	AVPR2	chrX_153905837.0_153905856.0	TACTTCACGGCCCGACACA
sg007986	AVPR2	chrX_153905885.0_153905904.0	ATGGCCAGGATCATGTAGG
sg007987	AVPR2	chrX_153905823.0_153905842.0	ACACAGGGCATCTGGCCCA
sg008072	B3GALT1	chr2_167869620.0_167869639.0	CTCCACCAAGCCACGAAGA
sg008073	B3GALT1	chr2_167869392.0_167869411.0	AGGATCAGCATTCTTGCCC
sg008074	B3GALT1	chr2_167869444.0_167869463.0	ATCTTCCATGATATCATCG
sg008075	B3GALT1	chr2_167869494.0_167869513.0	TACCCTCAAAACATTAATG
sg008076	B3GALT1	chr2_167869091.0_167869110.0	CTCAAGTACCAGAGAGCGC
sg008077	B3GALT1	chr2_167869775.0_167869794.0	TAAATGAGTTCAGCTACAT
sg008522	BBOX1	chr11_27055574.0_27055593.0	AAAGCACGGAAACTTCTAG
sg008523	BBOX1	chr11_27093231.0_27093250.0	TGATGAACACGCATACAAG
sg008524	BBOX1	chr11_27119667.0_27119686.0	TAAAGCAAACAGTCACAGG
sg008525	BBOX1	chr11_27055448.0_27055467.0	AAGGCAGAAGCACTTGACG
sg008526	BBOX1	chr11_27115536.0_27115555.0	GCCCTCCATCATCCACCTG
sg008527	BBOX1	chr11_27119769.0_27119788.0	GTAAAGTCCACAAAGGTAG
sg008840	BCOR	chrX_40073550.0_40073569.0	CCACGTGCTGAATAACGGA
sg008841	BCOR	chrX_40075016.0_40075035.0	CTGCCACAAGCACTCTAGG
sg008842	BCOR	chrX_40072437.0_40072456.0	AAGAGAATCGCCAACTCAG
sg008843	BCOR	chrX_40073205.0_40073224.0	CAAACTCTGGACGGCCGGT
sg008844	BCOR	chrX_40057183.0_40057202.0	ATCAGCGCCATATTCAAGG
sg008845	BCOR	chrX_40073728.0_40073747.0	CTGGGCGATACCACAGCAG
sg008846	BCORL1	chrX_130013144.0_130013163.0	CCCGCATCTGACAGCGCCG
sg008847	BCORL1	chrX_130014116.0_130014135.0	GAGGCGGGATATATACCAG
sg008848	BCORL1	chrX_130013467.0_130013486.0	TGGAACAAGCCCTGAATGG
sg008849	BCORL1	chrX_130015217.0_130015236.0	TCCCATTGACTGAACACCG
sg008850	BCORL1	chrX_130039134.0_130039153.0	AGGCCAGTTCATGATGCGG
sg008851	BCORL1	chrX_130015332.0_130015351.0	ATGGGCGCCCCCTGACTGG
sg009092	BHMT2	chr5_79077591.0_79077610.0	TGATAGAACACCCAGACGC
sg009093	BHMT2	chr5_79082853.0_79082872.0	AAAGAATCAGATAGACCCG
sg009094	BHMT2	chr5_79080740.0_79080759.0	GGTGATGCTTTGGTAGCAG
sg009095	BHMT2	chr5_79082923.0_79082942.0	CTCACAGCACATTCTCCGG
sg009096	BHMT2	chr5_79083835.0_79083854.0	CAAACCCTGGATTAGAGCA
sg009097	BHMT2	chr5_79083244.0_79083263.0	ACGATGGAGCTCATGAAGG
sg009164	BIRC6	chr2_32392090.0_32392109.0	CCCACCTATAGCCTACATG
sg009165	BIRC6	chr2_32441371.0_32441390.0	GTAAATCTGAAAACCTCCG
sg009166	BIRC6	chr2_32415549.0_32415568.0	TGCACTCAAGGATTCAACA
sg009167	BIRC6	chr2_32467589.0_32467608.0	AGGCCAAGTCTCCACAAGT
sg009168	BIRC6	chr2_32415451.0_32415470.0	AGGCTGCCAAAGTTTGCAG
sg009169	BIRC6	chr2_32416066.0_32416085.0	GTGGAGCCTCCCAAAAAGG
sg009326	BMP3	chr4_81046024.0_81046043.0	ATCACTCAACTCTTGAGGA
sg009327	BMP3	chr4_81045852.0_81045871.0	TCCAGACACTGGACAACTC
sg009328	BMP3	chr4_81046181.0_81046200.0	GTGTGGTATCAAGCTTACA
sg009329	BMP3	chr4_81046276.0_81046295.0	AGGAAGAAGCGCTCTACTG
sg009330	BMP3	chr4_81046309.0_81046328.0	GAAGCTCGTTGTTCTGCAG
sg009331	BMP3	chr4_81031479.0_81031498.0	AGGTACAGCACGGTCCAGG
sg009338	BMP5	chr6_55874474.0_55874493.0	GAGATAACTGTATGCGACG
sg009339	BMP5	chr6_55819733.0_55819752.0	GCTGAATTCCGGATATACA
sg009340	BMP5	chr6_55874785.0_55874804.0	TAGTGGGTTATGCAAAAGG
sg009341	BMP5	chr6_55794377.0_55794396.0	AAGGCCCAAGCTTTAGATG
sg009342	BMP5	chr6_55759004.0_55759023.0	CAGAGTCTGAACTATAGCG
sg009343	BMP5	chr6_55794302.0_55794321.0	GTAAGCCCAAATTATTCTG
sg009368	BMPER	chr7_34078989.0_34079008.0	GGTGAAGAACGACGCCCGC
sg009369	BMPER	chr7_33970408.0_33970427.0	AACGTTACCTGGACATGTG
sg009370	BMPER	chr7_34046394.0_34046413.0	TAACTCACCCAAACATTTG
sg009371	BMPER	chr7_34078888.0_34078907.0	CGTCAAAAGTGTTGTAGTG
sg009372	BMPER	chr7_33906881.0_33906900.0	GCAGACACACATTATGCAA
sg009373	BMPER	chr7_33905691.0_33905710.0	CTGCTACTCAATTGCTCGG
sg009398	BMX	chrX_15522545.0_15522564.0	GGAAGACTTCCCTGACTGG
sg009399	BMX	chrX_15531348.0_15531367.0	GTTAGAAATTCGAGCCAAG
sg009400	BMX	chrX_15536377.0_15536396.0	GTTGGCCTTTGTTGACACA
sg009401	BMX	chrX_15536418.0_15536437.0	GTATCCATACCATTTCCCA
sg009402	BMX	chrX_15516127.0_15516146.0	GTACTTGACCAGCAGGTGG
sg009403	BMX	chrX_15511477.0_15511496.0	TGAAGAGAGCCGAAGTCAG
sg009630	BRCA1	chr17_43093192.0_43093211.0	GGTACTGATTATGGCACTC
sg009631	BRCA1	chr17_43093521.0_43093540.0	GAAACCTACAACTCATGGA
sg009632	BRCA1	chr17_43091917.0_43091936.0	GCTCAGGGTTACCGAAGAG
sg009633	BRCA1	chr17_43094569.0_43094588.0	AGGAGCCAACATAACAGAT
sg009634	BRCA1	chr17_43047660.0_43047679.0	CAGCCAGATGCCTGGACAG
sg009635	BRCA1	chr17_43094128.0_43094147.0	GGGAAAACCTATCGGAAGA
sg009636	BRCA2	chr13_32336732.0_32336751.0	AAATGTCAGACAAGCTCAA
sg009637	BRCA2	chr13_32340019.0_32340038.0	ATTATGGCAGGTTGTTACG
sg009638	BRCA2	chr13_32326588.0_32326607.0	GCACAGTAGAACTAAGGGT
sg009639	BRCA2	chr13_32337866.0_32337885.0	TCTACCTGACCAATCGATG
sg009640	BRCA2	chr13_32319129.0_32319148.0	CAGGTTCAGAATTATAGGG
sg009641	BRCA2	chr13_32340521.0_32340540.0	CTGGATTTAGTACAGCAAG
sg010090	BTNL9	chr5_181053220.0_181053239.0	AACGCGCTCTTCCACGCAG
sg010091	BTNL9	chr5_181048042.0_181048061.0	CGGAGTCAGACCTTCAATG
sg010092	BTNL9	chr5_181045591.0_181045610.0	CAGACACAATACCTGAGCT
sg010093	BTNL9	chr5_181050221.0_181050240.0	GAGTTTGAAGCCATCGTCT
sg010094	BTNL9	chr5_181053457.0_181053476.0	TTTCCCTTCAGAAAAGCTG
sg010095	BTNL9	chr5_181045569.0_181045588.0	CTCCCCAGGCTGAAGGAGG
sg010276	C10orf90	chr10_126504852.0_126504871.0	CGGCACCGTCAGATGAGCG
sg010277	C10orf90	chr10_126513849.0_126513868.0	GCAAAATCTGACTTCACCA
sg010278	C10orf90	chr10_126504954.0_126504973.0	TGTGCACGAGACTGAGCAA
sg010279	C10orf90	chr10_126504359.0_126504378.0	AATTTGAGGTGGCTCAATG
sg010280	C10orf90	chr10_126504568.0_126504587.0	GTGCGGCTGAAGGTTCCCG
sg010281	C10orf90	chr10_126504108.0_126504127.0	CCACTCCAAGGACAAGCGC
sg010665	C14orf180	chr14_104586481.0_104586500.0	CGTCAGACCAGAAAGAATG
sg010666	C14orf180	chr14_104587776.0_104587795.0	GGCCGGCTCCGTTTCAGGA
sg010667	C14orf180	chr14_104588300.0_104588319.0	CAGAACTCACCCCTGACAG
sg010668	C14orf180	chr14_104587844.0_104587863.0	TGGTTCCGAGAACCCCCAG
sg010669	C14orf180	chr14_104586484.0_104586503.0	CAGACCAGAAAGAATGAGG
sg010670	C14orf180	chr14_104587793.0_104587812.0	CCGGAGCACCACCGCCCAG
sg010895	C16orf89	chr16_5060328.0_5060347.0	CCCCAGGACTCATTCTCAG
sg010896	C16orf89	chr16_5060376.0_5060395.0	CAGTGTGGATCCAGGCATG
sg010897	C16orf89	chr16_5065750.0_5065769.0	CTCTGTTCTAGGAAGACGG
sg010898	C16orf89	chr16_5056073.0_5056092.0	GGATACGCCTACCCTACCC
sg010899	C16orf89	chr16_5060348.0_5060367.0	CCGAACGTGGGGTACACCA
sg010900	C16orf89	chr16_5060351.0_5060370.0	AACGTGGGGTACACCAAGG
sg011367	C1QTNF7	chr4_15442173.0_15442192.0	GAGGTAAGACTGGACCGCT
sg011368	C1QTNF7	chr4_15442456.0_15442475.0	GCACTACAACCCTGCCACA
sg011369	C1QTNF7	chr4_15435797.0_15435816.0	CTTTCAACTGATTACCCCG
sg011370	C1QTNF7	chr4_15435905.0_15435924.0	GAAGGCCGATGCGACCATG
sg011371	C1QTNF7	chr4_15442498.0_15442517.0	AGAAAAGTAATAGATCCCT
sg011372	C1QTNF7	chr4_15435915.0_15435934.0	TCGGCCTTCCAGGAAGAGA
sg011379	C1QTNF9	chr13_24321091.0_24321110.0	TGGGAGAGAAGGGCCTCCG
sg011380	C1QTNF9	chr13_24321411.0_24321430.0	TAATGGGCATATCTGAAGA
sg011381	C1QTNF9	chr13_24318824.0_24318843.0	AGGACGTCCTGGCAGCCCG
sg011382	C1QTNF9	chr13_24321010.0_24321029.0	TTGAAGCAAAAGGCATCAA
sg011383	C1QTNF9	chr13_24316105.0_24316124.0	CAGGCAGACCATTGTGACC
sg011384	C1QTNF9	chr13_24321219.0_24321238.0	CAATAGGGCCCATGGGGCC
sg011933	C2orf40	chr2_106073974.0_106073993.0	TGGGACCGGACTCGGCCCG
sg011934	C2orf40	chr2_106074012.0_106074031.0	GCCCATGTAGAGAAACTGC
sg011935	C2orf40	chr2_106074022.0_106074041.0	TACATGGGCTTTGACGAAG
sg011936	C2orf40	chr2_106073915.0_106073934.0	TTGGCTTTATTCTCATCAA
sg011937	C2orf40	chr2_106071870.0_106071889.0	TGATGCTTCAAAAACGAGA
sg011938	C2orf40	chr2_106074026.0_106074045.0	TGGGCTTTGACGAAGCGGT
sg012055	C2orf82	chr2_232876064.0_232876083.0	ACCGTCGCGCCAGGACCCG
sg012056	C2orf82	chr2_232875992.0_232876011.0	CCGTCGGGAGAAGGCCCCG
sg012057	C2orf82	chr2_232875966.0_232875985.0	GCCGGCTCGTTCCACAGCG
sg012058	C2orf82	chr2_232870399.0_232870418.0	TTACCTGTGAGCACCGCAG
sg012059	C2orf82	chr2_232876079.0_232876098.0	CCCGAGGACAGCACCGCGC
sg012060	C2orf82	chr2_232876351.0_232876370.0	CCCCTTTATTCGCTTCAGG
sg012067	C2orf88	chr2_190199949.0_190199968.0	AGAAGAGAGATGTCTACCT
sg012068	C2orf88	chr2_190200013.0_190200032.0	TCACAGTATTGGTCCCTGG
sg012069	C2orf88	chr2_190200016.0_190200035.0	GGGACCAATACTGTGATCT
sg012205	C4BPA	chr1_207134434.0_207134453.0	TGGTGAAATCACTCAACAC
sg012206	C4BPA	chr1_207131648.0_207131667.0	TTTGTAGCCAGGATGACAG
sg012207	C4BPA	chr1_207114138.0_207114157.0	GTCAACGTAATATCCATCG
sg012208	C4BPA	chr1_207114276.0_207114295.0	TGATACTTACAGATACAGA
sg012209	C4BPA	chr1_207124300.0_207124319.0	TCCACAGTGCAAGAAATGG
sg012210	C4BPA	chr1_207141234.0_207141253.0	GACCAGTGTGAATAACTGC
sg012409	C6	chr5_41201590.0_41201609.0	TGGTCCAAAATCTCCCAGG
sg012410	C6	chr5_41159150.0_41159169.0	ATAATCCTGCCCCCCAACG
sg012411	C6	chr5_41176492.0_41176511.0	CTCTATCAGTTTAGCAGTG
sg012412	C6	chr5_41181463.0_41181482.0	AGGCTCATTCTCAAGTCAG
sg012413	C6	chr5_41186151.0_41186170.0	TTGATAACTCTTTCACTGG
sg012414	C6	chr5_41159147.0_41159166.0	ATCCTGCCCCCCAACGAGG
sg012551	C7	chr5_40934397.0_40934416.0	AGTCCTGTGAACCTACAAG
sg012552	C7	chr5_40936435.0_40936454.0	GTTTATCGATATCACAGGA
sg012553	C7	chr5_40947737.0_40947756.0	TGGTCGATTAATCTTCGGT
sg012554	C7	chr5_40958203.0_40958222.0	AAACCGTACACATTTGGTG
sg012555	C7	chr5_40964826.0_40964845.0	ATGTGGAGAAGATTTACGG
sg012556	C7	chr5_40958032.0_40958051.0	CTGACACCTTTATATGAGC
sg013037	CA3	chr8_85439721.0_85439740.0	TGGGAAAAGTTCATGCCAG
sg013038	CA3	chr8_85439815.0_85439834.0	CATCATAAGACACAGACCA
sg013039	CA3	chr8_85439768.0_85439787.0	TCTTTAGTATGCAGCTCAA
sg013040	CA3	chr8_85439877.0_85439896.0	AGTATCATCAAATACAACT
sg013041	CA3	chr8_85442063.0_85442082.0	GAATCACAGTGCTGAGAGG
sg013042	CA3	chr8_85446129.0_85446148.0	GCTCTTACCCAGGGCAAGG
sg013043	CA4	chr17_60155312.0_60155331.0	GAGTCACACTGGTGCTACG
sg013044	CA4	chr17_60156668.0_60156687.0	CTACGATAAGAAGCAAACG
sg013045	CA4	chr17_60158278.0_60158297.0	TCAGAGATGAGCACTACGA
sg013046	CA4	chr17_60157516.0_60157535.0	GAGCCCTTATATGGCAAGT
sg013047	CA4	chr17_60159319.0_60159338.0	CGCACGGTGATAAAGTCCG
sg013048	CA4	chr17_60155359.0_60155378.0	GCTGTACTCACCCAAGCAG
sg013061	CA6	chr1_8958981.0_8959000.0	GTACTGGCAGCCTTCGTTG
sg013062	CA6	chr1_8957264.0_8957283.0	GGGATCAGACATGTGATCG
sg013063	CA6	chr1_8949323.0_8949342.0	GTCGCCTATCAACCTACAG
sg013064	CA6	chr1_8949419.0_8949438.0	GTGGCCATTGTTGACCATG
sg013065	CA6	chr1_8949421.0_8949440.0	TGGTCAACAATGGCCACAC
sg013066	CA6	chr1_8945944.0_8945963.0	TGTCTGACTGGACCTACTC
sg013193	CACNA1D	chr3_53723961.0_53723980.0	GCTTGAGGGAAATTGTCAA
sg013194	CACNA1D	chr3_53762042.0_53762061.0	ATCGGCAGCATTATAGACG
sg013195	CACNA1D	chr3_53660250.0_53660269.0	CTCCTGACACTAGTCGAAG
sg013196	CACNA1D	chr3_53749287.0_53749306.0	ACTCGAATGGAGAGAACAT
sg013197	CACNA1D	chr3_53772852.0_53772871.0	GAACAGCATGGCTATGAGG
sg013198	CACNA1D	chr3_53786818.0_53786837.0	TAGATGATGAGGTAACCGT
sg013199	CACNA1E	chr1_181731190.0_181731209.0	AGACACCACATGTCGATGT
sg013200	CACNA1E	chr1_181720807.0_181720826.0	AGGTATCAAAATTTGCCGA
sg013201	CACNA1E	chr1_181733724.0_181733743.0	CACGGTTGAGTCCACCAAG
sg013202	CACNA1E	chr1_181577788.0_181577807.0	TCCACGTGAGTATTGAAGT
sg013203	CACNA1E	chr1_181511465.0_181511484.0	GACATTCCAGCCATTGCGG
sg013204	CACNA1E	chr1_181719833.0_181719852.0	AAATATTCTTAGAAGCCGG
sg013235	CACNA2D1	chr7_81982568.0_81982587.0	CTATACATTCATAGCACCA
sg013236	CACNA2D1	chr7_82136648.0_82136667.0	GTTGTCTACTACAATGCAA
sg013237	CACNA2D1	chr7_82005754.0_82005773.0	TTCATCTTACTGTAAAACG
sg013238	CACNA2D1	chr7_82084773.0_82084792.0	TAATATCGAGCTAGGCCAG
sg013239	CACNA2D1	chr7_81950488.0_81950507.0	AGGATTATACTGACTGTGG
sg013240	CACNA2D1	chr7_81964075.0_81964094.0	CATATTACAAATTGGCTGG
sg013367	CADM3	chr1_159191994.0_159192013.0	TGCCAAGTGAAAGATCACG
sg013368	CADM3	chr1_159192627.0_159192646.0	AGCATCAGCATCAGCAATG
sg013369	CADM3	chr1_159193881.0_159193900.0	GCATACAGGAAGATCCCAA
sg013370	CADM3	chr1_159193485.0_159193504.0	GAAGACTGACAGTTTAGGG
sg013371	CADM3	chr1_159192041.0_159192060.0	GTAGAGAGTCTGCTGAGCA
sg013372	CADM3	chr1_159191946.0_159191965.0	TGGACATCTGATGAAACAG
sg013715	CAPN11	chr6_44176244.0_44176263.0	CCACCCAGGTCCACTACAG
sg013716	CAPN11	chr6_44173363.0_44173382.0	ATGGAGCAACCCATGAGGG
sg013717	CAPN11	chr6_44172345.0_44172364.0	CCCAAACTGCTATACCGCG
sg013718	CAPN11	chr6_44173227.0_44173246.0	TCCTATGAAGCATTGTCAG
sg013719	CAPN11	chr6_44180023.0_44180042.0	ATCTTCACCAACTCACGGG
sg013720	CAPN11	chr6_44183001.0_44183020.0	TGGTTATTGAGAAAGCAGG
sg013763	CAPN6	chrX_111252380.0_111252399.0	AGATACACTGAGCTTGTTG
sg013764	CAPN6	chrX_111251540.0_111251559.0	CAACTCACATTTCACTCCA
sg013765	CAPN6	chrX_111254366.0_111254385.0	TGTTGCCCACAATCAGATG
sg013766	CAPN6	chrX_111251541.0_111251560.0	AACTCACATTTCACTCCAG
sg013767	CAPN6	chrX_111253070.0_111253089.0	ACCAGATCTCCGTTAATGG
sg013768	CAPN6	chrX_111252457.0_111252476.0	GTGATGGTCAAACCATCCA
sg013841	CAPZA3	chr12_18738389.0_18738408.0	AAAAACTTATGCACCACCA
sg013842	CAPZA3	chr12_18738492.0_18738511.0	GTAGTCGCCCATTACATTG
sg013843	CAPZA3	chr12_18738322.0_18738341.0	TTATTACAGGCCCCTCCAG
sg013844	CAPZA3	chr12_18738818.0_18738837.0	AATATTCTTCCCGTTACTT
sg013845	CAPZA3	chr12_18738744.0_18738763.0	CTATGAAACAGGAGAGTGC
sg013846	CAPZA3	chr12_18738805.0_18738824.0	CCATTTCTAACCCAAGTAA
sg013859	CARD11	chr7_2928616.0_2928635.0	ATCGTCAGACGCTACAAGG
sg013860	CARD11	chr7_2938767.0_2938786.0	ATCTTGGAACACGACCGCA
sg013861	CARD11	chr7_2944258.0_2944277.0	CGCTACGCACAGCTCAGTG
sg013862	CARD11	chr7_2937108.0_2937127.0	GAGGATCGAGATGGTGCGG
sg013863	CARD11	chr7_2938025.0_2938044.0	TGTGGTTCACAGTACCTGG
sg013864	CARD11	chr7_2910057.0_2910076.0	GTGTGAGAAGAACATCAAG
sg013971	CASC5	chr15_40622763.0_40622782.0	CAGAAACCTAAATTTCCAA
sg013972	CASC5	chr15_40623225.0_40623244.0	GTGATATGTACTCCTACTG
sg013973	CASC5	chr15_40622269.0_40622288.0	GCCATAATATAGTCTACTG
sg013974	CASC5	chr15_40621419.0_40621438.0	ACCAGAAGTCATATTATGG
sg014071	CASQ2	chr1_115726993.0_115727012.0	GTTTGTGAAGGAACACCAA
sg014072	CASQ2	chr1_115732895.0_115732914.0	CTTACCCCTTTGTCAAAGG
sg014073	CASQ2	chr1_115744869.0_115744888.0	AAAGCTATAGGCTTTGTGA
sg014074	CASQ2	chr1_115768445.0_115768464.0	GTCCTTCCCATCATATGTG
sg014075	CASQ2	chr1_115768361.0_115768380.0	CACCGGCTCATGGTAGTAG
sg014076	CASQ2	chr1_115727025.0_115727044.0	AACAAACCTTACACAGAAG
sg014155	CAV1	chr7_116526563.0_116526582.0	ATCTACAAGCCCAACAACA
sg014156	CAV1	chr7_116526626.0_116526645.0	CACACCAAGGAGATCGACC
sg014157	CAV1	chr7_116526662.0_116526681.0	AAACACCTCAACGATGACG
sg014158	CAV1	chr7_116558959.0_116558978.0	TGTGATTGCAGAACCAGAA
sg014159	CAV1	chr7_116559111.0_116559130.0	ATGTGCAGGAAAGAGAGAA
sg014160	CAV1	chr7_116559052.0_116559071.0	AAAGAGGGCAGACAGCAAG
sg014185	CBFB	chr16_67066712.0_67066731.0	GAGTCTGTGTTATCTGGAA
sg014186	CBFB	chr16_67036716.0_67036735.0	AGTCGACATACTCTCGGCT
sg014187	CBFB	chr16_67029475.0_67029494.0	CTGCCTCACCTCACACTCG
sg014188	CBFB	chr16_67029803.0_67029822.0	CCGACTTACGATTTCCGAG
sg014189	CBFB	chr16_67066735.0_67066754.0	TGGATTGATCTCCAAAGAC
sg014190	CBFB	chr16_67029718.0_67029737.0	CCTTGCAGATTAAGTACAC
sg014383	CCAR2	chr8_22615780.0_22615799.0	ACGGACACTGATCTCCCAG
sg014384	CCAR2	chr8_22613028.0_22613047.0	CTCCAAGAAACGCAAACAG
sg014385	CCAR2	chr8_22614145.0_22614164.0	CACGGACAGAAAATCTGAG
sg014386	CCAR2	chr8_22614298.0_22614317.0	TACCTTCGAACTATAAGCG
sg014387	CCAR2	chr8_22614136.0_22614155.0	AAAATCTGAGGGGACCAGG
sg014388	CCAR2	chr8_22607276.0_22607295.0	GAGGCTGGAAGATCAACTG
sg014780	CCDC178	chr18_33389601.0_33389620.0	AGAACCAAACTTTGAGACA
sg014781	CCDC178	chr18_33370116.0_33370135.0	GGTGCTGGAATATTTACTA
sg014782	CCDC178	chr18_33333221.0_33333240.0	CTGCTTAGAGTCCAGTAGA
sg014783	CCDC178	chr18_33346327.0_33346346.0	AAAAGTCTAGAAACTGACC
sg014784	CCDC178	chr18_33245336.0_33245355.0	CTCAAGAACATCTATAAGG
sg014785	CCDC178	chr18_33389541.0_33389560.0	GTAAAATGACAAATACTGA
sg015310	CCL14	chr17_35984397.0_35984416.0	GGGATCTTGTAGGTAGTGT
sg015311	CCL14	chr17_35984415.0_35984434.0	TAGGTGAAGCAGCACTCTG
sg015312	CCL14	chr17_35984377.0_35984396.0	AATCCATAATCCGCTGACG
sg015313	CCL14	chr17_35984420.0_35984439.0	GAAGCAGCACTCTGAGGGG
sg015314	CCL14	chr17_35984390.0_35984409.0	CTACAAGATCCCGCGTCAG
sg015315	CCL14	chr17_35984378.0_35984397.0	ATCCATAATCCGCTGACGC
sg015356	CCL21	chr9_34709847.0_34709866.0	CTTCCTTTGGCTGTACTTG
sg015357	CCL21	chr9_34709837.0_34709856.0	CAAAGGAAGATTCCCGCCA
sg015358	CCL21	chr9_34709786.0_34709805.0	GGATGGAGCAGCCTAAGCT
sg015359	CCL21	chr9_34709653.0_34709672.0	CTGCCTGAGAGCGCTTGCG
sg015360	CCL21	chr9_34709853.0_34709872.0	TTGCCTCAAGTACAGCCAA
sg015361	CCL21	chr9_34709766.0_34709785.0	GTCCACTCACAGGATAGCT
sg015398	CCL28	chr5_43381994.0_43382013.0	CAACCATACTGTTAAGCAG
sg015399	CCL28	chr5_43388362.0_43388381.0	GCTGATGGGGATTGTGACT
sg015400	CCL28	chr5_43381996.0_43382015.0	GCTTAACAGTATGGTTGTG
sg015401	CCL28	chr5_43388375.0_43388394.0	TCGCATCCAGAGAGCTGAT
sg015402	CCL28	chr5_43388443.0_43388462.0	GCCTCCAGCTGTTGCACGG
sg015403	CCL28	chr5_43388439.0_43388458.0	ACCTCCGTGCAACAGCTGG
sg016041	CD300LG	chr17_43853902.0_43853921.0	AAAGGACTTCTCAGTACAC
sg016042	CD300LG	chr17_43848768.0_43848787.0	AATGAGCGAGAGCTCCTGG
sg016043	CD300LG	chr17_43848583.0_43848602.0	GAAATCAGCGGGTTCGAAG
sg016044	CD300LG	chr17_43848830.0_43848849.0	GGTGTGGGGTCGAAAAACG
sg016045	CD300LG	chr17_43848651.0_43848670.0	CCTGCACCAGTACTTCCGG
sg016046	CD300LG	chr17_43855260.0_43855279.0	CAGGCCTGCGGCTGACAGA
sg016071	CD36	chr7_80666468.0_80666487.0	GCGACATGATTAATGGTAC
sg016072	CD36	chr7_80661153.0_80661172.0	CTGTTCCAACTGATAGTGA
sg016073	CD36	chr7_80671002.0_80671021.0	ATTCCTTTCAGATTAACGT
sg016074	CD36	chr7_80663138.0_80663157.0	ACCAACTGTGGTAGTAACA
sg016075	CD36	chr7_80661142.0_80661161.0	GATAGTGAAGGTTCGAAGA
sg016593	CDH1	chr16_68808818.0_68808837.0	CAATGCGTTCTCTATCCAG
sg016594	CDH1	chr16_68812143.0_68812162.0	GAACCACCAGGGTATACGT
sg016595	CDH1	chr16_68819311.0_68819330.0	TGGAGATTAATCCGGACAC
sg016596	CDH1	chr16_68801844.0_68801863.0	AGTCACGCTGAATACAGTG
sg016597	CDH1	chr16_68811697.0_68811716.0	GAGGTCACAGCCACAGACG
sg016598	CDH1	chr16_68815608.0_68815627.0	AGCACATCCACGGTGACGG
sg016659	CDH20	chr18_61500430.0_61500449.0	ACCCTGGCACTGTTGCCGT
sg016660	CDH20	chr18_61507402.0_61507421.0	CTCCAATTAGCTCCACTGT
sg016661	CDH20	chr18_61490779.0_61490798.0	TTGCCGACATACAAAGGGT
sg016662	CDH20	chr18_61536574.0_61536593.0	AAAATTCTTCCCGGTCTAG
sg016663	CDH20	chr18_61499276.0_61499295.0	ATGGCGTGGATGTCTCCAG
sg016664	CDH20	chr18_61554610.0_61554629.0	CGACTTCCTGACGGACTGG
sg016797	CDK12	chr17_39462331.0_39462350.0	GGCCTTCAAACTAGACCGA
sg016798	CDK12	chr17_39462879.0_39462898.0	CTGACCGACTGCCTTCTCG
sg016799	CDK12	chr17_39501283.0_39501302.0	TAGCAGTCCCATTAAGTCA
sg016800	CDK12	chr17_39471204.0_39471223.0	TTCACCAGTTCAGTATCTG
sg016801	CDK12	chr17_39494550.0_39494569.0	GACTAGACAATGAGAAAGA
sg016802	CDK12	chr17_39462539.0_39462558.0	GAGACTGATGACTATGGGA
sg016988	CDKN2A	chr9_21974775.0_21974794.0	TGGCCAGCCAGTCAGCCGA
sg016989	CDKN2A	chr9_21974689.0_21974708.0	ACCGAATAGTTACGGTCGG
sg016990	CDKN2A	chr9_21971183.0_21971202.0	ATGATGGGCAGCGCCCGAG
sg016991	CDKN2A	chr9_21971115.0_21971134.0	GGGTCGGGTGAGAGTGGCG
sg016992	CDKN2A	chr9_21970971.0_21970990.0	GTACCGTGCGACATCGCGA
sg016993	CDKN2A	chr9_21970916.0_21970935.0	CATGCCCGCATAGATGCCG
sg017036	CDO1	chr5_115811188.0_115811207.0	GAAGTCTGAAAGAGTCTTG
sg017037	CDO1	chr5_115813241.0_115813260.0	AGGTATACCCGAAATCTTG
sg017038	CDO1	chr5_115816344.0_115816363.0	ATGCGGATCAGATCAGCCA
sg017039	CDO1	chr5_115816258.0_115816277.0	GAGAGCGACCCCACCGAGT
sg017040	CDO1	chr5_115806425.0_115806444.0	CATGGCATGTATCAAAAGG
sg017041	CDO1	chr5_115806441.0_115806460.0	AGGTGGACTGTACAAGTGA
sg017813	CES1	chr16_55821389.0_55821408.0	TCTTTGGAGAGTCAGCGGG
sg017814	CES1	chr16_55828753.0_55828772.0	TGCCGCAGCTTACATAGGA
sg017815	CES1	chr16_55810983.0_55811002.0	GAGCTATCCACTCTCCGAA
sg017816	CES1	chr16_55823659.0_55823678.0	GGTGTGGATCCACGGAGGG
sg017817	CES1	chr16_55823663.0_55823682.0	TGATGGTGTGGATCCACGG
sg017818	CES1	chr16_55810518.0_55810537.0	TTGTGGCCCGGAACCACAG
sg017999	CFD	chr19_861770.0_861789.0	CCGGGAACTCTCTGCGACG
sg018000	CFD	chr19_860625.0_860644.0	CCCGTGGTCGGATCCTGGG
sg018001	CFD	chr19_860679.0_860698.0	TGGCGTCGGTGCAGCTGAA
sg018002	CFD	chr19_860918.0_860937.0	CGTCGTACAGGCGCTTGGA
sg018003	CFD	chr19_861797.0_861816.0	TGGGGCATAGTCAACCACG
sg018004	CFD	chr19_861873.0_861892.0	TGCGTGCGCCGGTTGCAGG
sg018281	CHD4	chr12_6591558.0_6591577.0	AAGATGCTAGACCTGCTAG
sg018282	CHD4	chr12_6592689.0_6592708.0	ACTTACTGGAACCTCTCGG
sg018283	CHD4	chr12_6599762.0_6599781.0	AGTCACTCACCGTACAACG
sg018284	CHD4	chr12_6593509.0_6593528.0	TGTATGTCGTAACCTATGT
sg018285	CHD4	chr12_6570933.0_6570952.0	GTAACCTCACAGCAACTGG
sg018286	CHD4	chr12_6577833.0_6577852.0	TCAAGGGTGAAATGAACCG
sg018413	CHL1	chr3_341961.0_341980.0	GATCTATACTTCGCAAACG
sg018414	CHL1	chr3_361727.0_361746.0	GGAGAAAATTACGCTACAG
sg018415	CHL1	chr3_328241.0_328260.0	ATTCAGGATCCCAAACGAG
sg018416	CHL1	chr3_354762.0_354781.0	TTAAACTTACTGTCAACTG
sg018417	CHL1	chr3_340819.0_340838.0	ATTGACCCTCTTGAAGTGG
sg018418	CHL1	chr3_391138.0_391157.0	TATTTCAAACACCAGAAGG
sg018563	CHRDL1	chrX_110688729.0_110688748.0	CACAATGCCAAATGCCCGG
sg018564	CHRDL1	chrX_110694185.0_110694204.0	TTGATGACAATTTGCACAA
sg018565	CHRDL1	chrX_110721457.0_110721476.0	ATGGGACAACTTACCAACA
sg018566	CHRDL1	chrX_110762765.0_110762784.0	CAAGACAAGAAGTACAGAG
sg018567	CHRDL1	chrX_110762696.0_110762715.0	GTGAACTGCATCTGCTCAG
sg018568	CHRDL1	chrX_110681535.0_110681554.0	ACAACCAGAAAAATAGCAC
sg018791	CHST9	chr18_27142710.0_27142729.0	GACTTGCAAATACATGAAG
sg018792	CHST9	chr18_26916938.0_26916957.0	CACAAAATCTTATATTGTG
sg018793	CHST9	chr18_26917180.0_26917199.0	AGTTGATTGAAAAACGTCA
sg018794	CHST9	chr18_27024134.0_27024153.0	GGGACCAGTGAAGTACTTG
sg018795	CHST9	chr18_27142761.0_27142780.0	AGAGAGGAAGACTTGTTTG
sg018796	CHST9	chr18_26916567.0_26916586.0	GTGGGAATCCAGCAAGTAG
sg018893	CIDEA	chr18_12274153.0_12274172.0	TTCAGCCTGTACAAGTCGA
sg018894	CIDEA	chr18_12262926.0_12262945.0	GCTTGCCATCACCCCACGC
sg018895	CIDEA	chr18_12262871.0_12262890.0	CGAGCTGGATGCATGAGCG
sg018896	CIDEA	chr18_12264319.0_12264338.0	AGTCCGGTAGCGATGACGA
sg018897	CIDEA	chr18_12264336.0_12264355.0	CTGGTCACTCTGGTGCTGG
sg018898	CIDEA	chr18_12274185.0_12274204.0	ATCGGCTGCCTTAACGTGA
sg018905	CIDEC	chr3_9877110.0_9877129.0	CACGGCGGATCGAAGCGTG
sg018906	CIDEC	chr3_9877196.0_9877215.0	GTGTCAGTGCGTACCTCTG
sg018907	CIDEC	chr3_9869992.0_9870011.0	TACAGATCAAACGTTACAC
sg018908	CIDEC	chr3_9870036.0_9870055.0	CTTATGGGAGAGGGACAGT
sg018909	CIDEC	chr3_9870193.0_9870212.0	GTTCATGGTCCTCCAGAAG
sg018910	CIDEC	chr3_9867201.0_9867220.0	CAGCTCCTCGATGCTACGG
sg019071	CKMT2	chr5_81252806.0_81252825.0	CAGTGCATCCAGACTGGAG
sg019072	CKMT2	chr5_81254420.0_81254439.0	TCATCAAACTAAGACACAA
sg019073	CKMT2	chr5_81257766.0_81257785.0	AATGAGGAGGATCACACCA
sg019074	CKMT2	chr5_81256945.0_81256964.0	CCAGCACATGTTAATAAAG
sg019075	CKMT2	chr5_81255162.0_81255181.0	CTCGGACAGCTTGTAGTAG
sg019076	CKMT2	chr5_81252750.0_81252769.0	AGCTTGGCATAAATGGCGG
sg019125	CLCA4	chr1_86565302.0_86565321.0	GAGTTTATAAGTGTCAAGG
sg019126	CLCA4	chr1_86567564.0_86567583.0	GATGAAAGAAACACACTCA
sg019127	CLCA4	chr1_86571163.0_86571182.0	GATGAAGTGAAACAAAGTG
sg019128	CLCA4	chr1_86560242.0_86560261.0	GTATGGTTCATCTCTACCT
sg019129	CLCA4	chr1_86572659.0_86572678.0	AGCCCCAAAAGCATCAATG
sg019130	CLCA4	chr1_86571188.0_86571207.0	AAAGCAATAAAATGAACAA
sg019209	CLDN11	chr3_170419145.0_170419164.0	GTCACCACCCAGTCATTGG
sg019210	CLDN11	chr3_170419229.0_170419248.0	CCCGTGGCCATGACGCAGT
sg019211	CLDN11	chr3_170423218.0_170423237.0	TCAGCAGCAGTAAAATGGC
sg019212	CLDN11	chr3_170423186.0_170423205.0	ACCGAGGCAGCAATCATCA
sg019213	CLDN11	chr3_170432544.0_170432563.0	CACACAGGGAACCAGATGG
sg019214	CLDN11	chr3_170423181.0_170423200.0	GGCAGCAATCATCAGGGCG
sg019251	CLDN19	chr1_42738287.0_42738306.0	CACTTTGACTGCTGTCTCG
sg019252	CLDN19	chr1_42738493.0_42738512.0	AGTTGGCATGAAGTGTACG
sg019253	CLDN19	chr1_42738568.0_42738587.0	AGGTCACATCCAATCAGCG
sg019254	CLDN19	chr1_42739956.0_42739975.0	GGAAGCAGTCTTCCTACGC
sg019255	CLDN19	chr1_42738246.0_42738265.0	CTTGGGTTGAAGAACTCCT
sg019256	CLDN19	chr1_42738567.0_42738586.0	GGTCACATCCAATCAGCGC
sg019311	CLDN5	chr22_19524050.0_19524069.0	CAGTGCAAAGTGTACGACT
sg019312	CLDN5	chr22_19524131.0_19524150.0	CTGGACCACAACATCGTGA
sg019313	CLDN5	chr22_19524380.0_19524399.0	GAGGTGCGACAGACCCGCG
sg019314	CLDN5	chr22_19524431.0_19524450.0	GCCCCCGAACCTTCAAAGA
sg019315	CLDN5	chr22_19524029.0_19524048.0	GTGCTGGCTCTGAGCACCG
sg019316	CLDN5	chr22_19523646.0_19523665.0	CGTGAAGTACTCAGCGCCG
sg019460	CLEC3B	chr3_45030858.0_45030877.0	AAGAGCCGTCTGGACACCC
sg019461	CLEC3B	chr3_45035541.0_45035560.0	AAGCATTTCATGTGCACCT
sg019462	CLEC3B	chr3_45035601.0_45035620.0	AGGACTGCATCTCGCGCGG
sg019463	CLEC3B	chr3_45035664.0_45035683.0	TGGCGCAGGTACTCATACA
sg019464	CLEC3B	chr3_45035856.0_45035875.0	TTGTCGAACCACTTGCCGT
sg019465	CLEC3B	chr3_45035670.0_45035689.0	AGTACCTGCGCCAGAGCGT
sg019496	CLEC4G	chr19_7731683.0_7731702.0	ATCACAGCCCAAAGGACTG
sg019497	CLEC4G	chr19_7730090.0_7730109.0	CTCTGTGCCAAAGACGACG
sg019498	CLEC4G	chr19_7730128.0_7730147.0	CGAAGGACAGCCACGACGT
sg019499	CLEC4G	chr19_7730854.0_7730873.0	CCTGCGGCTCCCAGGCTCG
sg019500	CLEC4G	chr19_7729437.0_7729456.0	TGTCATGATGCTGCACACG
sg019501	CLEC4G	chr19_7730100.0_7730119.0	GGCACAGAGAAAAAGTAGC
sg019592	CLIP1	chr12_122334649.0_122334668.0	CTGTTCAGAGAAGTATGCA
sg019593	CLIP1	chr12_122340934.0_122340953.0	AAATGCAATGAACAAACCA
sg019594	CLIP1	chr12_122361075.0_122361094.0	AGCCAAGGCCAACGCAGTG
sg019595	CLIP1	chr12_122341585.0_122341604.0	GAGTCCAATAAGCCTGCTG
sg019596	CLIP1	chr12_122334083.0_122334102.0	AATAAGTTACACCAAAAGG
sg019597	CLIP1	chr12_122355277.0_122355296.0	ATCTTCCTGGCGTAACGGG
sg019868	CMA1	chr14_24506566.0_24506585.0	GGAGCCCATAACATAACAG
sg019869	CMA1	chr14_24506468.0_24506487.0	CTTTAGTAACATGATATCG
sg019870	CMA1	chr14_24506207.0_24506226.0	ATTCAACTTTGTCCCACCT
sg019871	CMA1	chr14_24506586.0_24506605.0	GGTCTATAACAGTCACCCT
sg019872	CMA1	chr14_24505600.0_24505619.0	CCATAGGATACGATGCCCT
sg019873	CMA1	chr14_24506191.0_24506210.0	CCTGGGAGAATGTGCCGGG
sg019956	CMTM5	chr14_23377269.0_23377288.0	CGCCGGGACCGGCACCCTG
sg019957	CMTM5	chr14_23378449.0_23378468.0	GTAGTACTGGGTGGCATAG
sg019958	CMTM5	chr14_23377305.0_23377324.0	GAGCTCCAGGGCTTCGCGG
sg019959	CMTM5	chr14_23378406.0_23378425.0	AAGAACTCCAGTAGCGCCG
sg019960	CMTM5	chr14_23379051.0_23379070.0	GCCATCATCATCTTCCTGG
sg019961	CMTM5	chr14_23379315.0_23379334.0	ATAGGCAAAGATGGAAACC
sg020117	CNN1	chr19_11546720.0_11546739.0	TCAACCCAAAATTGGCACC
sg020118	CNN1	chr19_11546915.0_11546934.0	GAGAACACCAACCATACAC
sg020119	CNN1	chr19_11541130.0_11541149.0	GGGTGACAGGCCGTCGCAT
sg020120	CNN1	chr19_11547849.0_11547868.0	GGAGCGGAAATTCGAGCCG
sg020121	CNN1	chr19_11549575.0_11549594.0	GCGGCAGATCTTCGAGCCG
sg020122	CNN1	chr19_11538973.0_11538992.0	CCGAGGTTAAGAACAAGGT
sg020296	CNTFR	chr9_34557524.0_34557543.0	CCAATGGTGAACTCGTCAA
sg020297	CNTFR	chr9_34557616.0_34557635.0	CAGGTGCATGTAGCGAATG
sg020298	CNTFR	chr9_34564780.0_34564799.0	CTGACGTGACACTGCCATG
sg020299	CNTFR	chr9_34556299.0_34556318.0	CTTGAGAGGAAAAGACTCA
sg020300	CNTFR	chr9_34557569.0_34557588.0	TAAGTGTCAGCAATGCCCT
sg020301	CNTFR	chr9_34568913.0_34568932.0	TGGGCGTAGACAACTGCGG
sg020350	CNTNAP2	chr7_147562191.0_147562210.0	ATTACTGGATAGATCCTGA
sg020351	CNTNAP2	chr7_147121045.0_147121064.0	GACCACAGAGTGCCAGTGG
sg020352	CNTNAP2	chr7_147903686.0_147903705.0	TACTACTGTAACTGCGACG
sg020353	CNTNAP2	chr7_146839843.0_146839862.0	GATGCTCTACAGCGACACA
sg020354	CNTNAP2	chr7_147132295.0_147132314.0	AACGCTACAAGTTACCTGG
sg020355	CNTNAP2	chr7_147903654.0_147903673.0	CAGTTGCGTTCGATGCCGC
sg020356	CNTNAP3	chr9_39171384.0_39171403.0	CCAGCCGGGACAGTCACCA
sg020357	CNTNAP3	chr9_39133104.0_39133123.0	GGACGGTGGTGCAGCACGG
sg020358	CNTNAP3	chr9_39109148.0_39109167.0	ACACTACTTACGATCTCCG
sg020359	CNTNAP3	chr9_39193171.0_39193190.0	CTTTAGCCTGGAACCCTAG
sg020360	CNTNAP3	chr9_39103781.0_39103800.0	TTCTCCATAAACACCCCGG
sg020361	CNTNAP3	chr9_39133124.0_39133143.0	CTGCTCAGCAGACGCCGCG
sg020554	COL17A1	chr10_104043822.0_104043841.0	CAAGATCGTGACTTCGGGT
sg020555	COL17A1	chr10_104063797.0_104063816.0	TTCGGAGTTCCAAACAACA
sg020556	COL17A1	chr10_104053067.0_104053086.0	CTCACCACGAGGTCCCATG
sg020557	COL17A1	chr10_104074178.0_104074197.0	CATACCAAATTCCTTCCGA
sg020558	COL17A1	chr10_104033354.0_104033373.0	CAGGGCCTACTGCAAGGGA
sg020559	COL17A1	chr10_104064496.0_104064515.0	TTGTGATAGGTCCCCATGG
sg020614	COL25A1	chr4_109301836.0_109301855.0	AACCAACGACCTCCAGGCG
sg020615	COL25A1	chr4_108941356.0_108941375.0	AAGCACTACCTTAATCAGG
sg020616	COL25A1	chr4_108859714.0_108859733.0	GGTCCACCTGGTCAAAAAG
sg020617	COL25A1	chr4_108863378.0_108863397.0	TTTGTGACAGGGTGAACGG
sg020618	COL25A1	chr4_108863310.0_108863329.0	TAACTCACCTTTGGTCCGG
sg020619	COL25A1	chr4_109301904.0_109301923.0	CCGCCAGGACGGCACACGG
sg020722	COL6A3	chr2_237366836.0_237366855.0	GTGAGGAATATCGACTCGG
sg020723	COL6A3	chr2_237377069.0_237377088.0	CGCGCTGGACTATGCACAG
sg020724	COL6A3	chr2_237387905.0_237387924.0	CTCGCCCTTGATTTCGTGG
sg020725	COL6A3	chr2_237371843.0_237371862.0	CACCGAGAACACATATTCG
sg020726	COL6A3	chr2_237367089.0_237367108.0	GAAGGACTTCTCTACCAAG
sg020727	COL6A3	chr2_237374936.0_237374955.0	GGACAAACTCTTTCAACAG
sg020734	COL6A6	chr3_130565396.0_130565415.0	GGTCACACCCTCCCGTCGG
sg020735	COL6A6	chr3_130574107.0_130574126.0	TTTAGCGATACCTATCACC
sg020736	COL6A6	chr3_130565017.0_130565036.0	TCCAATAGGAACACAACAT
sg020737	COL6A6	chr3_130566851.0_130566870.0	CAGCTGTCAGCATACTGAA
sg020738	COL6A6	chr3_130567038.0_130567057.0	ATTTGTCAGGACAACAAGG
sg020739	COL6A6	chr3_130658734.0_130658753.0	AGCATTAGAGAGACTCCAG
sg021280	CPA1	chr7_130383683.0_130383702.0	ATCACTCAAGACTACGGGC
sg021281	CPA1	chr7_130384579.0_130384598.0	GGGGTCCACGCCAATACAG
sg021282	CPA1	chr7_130381825.0_130381844.0	GTGGCGTAGTTAAAAGTGT
sg021283	CPA1	chr7_130383415.0_130383434.0	CAGCCATCTGGATCGACAC
sg021284	CPA1	chr7_130381131.0_130381150.0	GCCCAGGTACAGAAGGTGA
sg021285	CPA1	chr7_130381095.0_130381114.0	TTCGGAGCACCTGATGCCT
sg021739	CREBBP	chr16_3739579.0_3739598.0	TTGCCCCCCTCCAAACACG
sg021740	CREBBP	chr16_3780863.0_3780882.0	TTAGCCCACTGATGAACGA
sg021741	CREBBP	chr16_3751711.0_3751730.0	AGGACGGTACTTACGTCTG
sg021742	CREBBP	chr16_3850333.0_3850352.0	CGCAAATGACTGGTCACGC
sg021743	CREBBP	chr16_3793475.0_3793494.0	CGAGAGCAAGCAAACGGAG
sg021744	CREBBP	chr16_3780785.0_3780804.0	CTAGCACCGGTGTAAGGAA
sg021799	CRHBP	chr5_76953194.0_76953213.0	GGGGAAAGCCGGTACCTAG
sg021800	CRHBP	chr5_76955741.0_76955760.0	TGAGAGTGGTCTTAGCAGG
sg021801	CRHBP	chr5_76953683.0_76953702.0	CGACTCACGCAGAGCGCGG
sg021802	CRHBP	chr5_76955657.0_76955676.0	TGATGGTTGGATTCTCAAG
sg021803	CRHBP	chr5_76958814.0_76958833.0	TTCTCCATAATTTATCCTG
sg021804	CRHBP	chr5_76954103.0_76954122.0	TCGGGCTCGCTGATGAAGA
sg021955	CRTAC1	chr10_97908083.0_97908102.0	TTGTCGCAGAAGATATCCG
sg021956	CRTAC1	chr10_98011144.0_98011163.0	GGGGACTTTGAGATCGTCG
sg021957	CRTAC1	chr10_98011243.0_98011262.0	TGGTGACTGCAGTGAACAT
sg021958	CRTAC1	chr10_97917606.0_97917625.0	ATTACGCCTACGGTAATGT
sg021959	CRTAC1	chr10_97923353.0_97923372.0	CAAGTTCCGCAATAACCGG
sg021960	CRTAC1	chr10_97884243.0_97884262.0	CTGGAGATCCTCTACCCCC
sg022015	CRYAB	chr11_111910391.0_111910410.0	GTGAAGCACTTCTCCCCAG
sg022016	CRYAB	chr11_111911588.0_111911607.0	GACTCAGGGAAGTAGACGT
sg022017	CRYAB	chr11_111911640.0_111911659.0	GAAGAACTGGTCAAAGAGG
sg022018	CRYAB	chr11_111911531.0_111911550.0	GTCCAGTGTCAAACCAGCT
sg022019	CRYAB	chr11_111911707.0_111911726.0	TGGATGGCGATGTCCATGG
sg022020	CRYAB	chr11_111910328.0_111910347.0	GGAAAACATGAAGAGCGCC
sg022195	CSF3	chr17_40015784.0_40015803.0	CAAGTGCTTAGAGCAAGTG
sg022196	CSF3	chr17_40016491.0_40016510.0	GCTTGAGCCAACTCCATAG
sg022197	CSF3	chr17_40016561.0_40016580.0	CAAGGTGGGACCCAACTCG
sg022198	CSF3	chr17_40016560.0_40016579.0	AAGGTGGGACCCAACTCGG
sg022199	CSF3	chr17_40016255.0_40016274.0	CAGCACCAGCTCCTCGGGG
sg022200	CSF3	chr17_40016791.0_40016810.0	CAGATGGAAGAACTGGGAA
sg022243	CSMD1	chr8_3574999.0_3575018.0	TGAACCGGATAATTAGGGG
sg022244	CSMD1	chr8_3343316.0_3343335.0	ATGGATCTGACACCGACCA
sg022245	CSMD1	chr8_3230197.0_3230216.0	ATACCTGGATCGTTACAGG
sg022246	CSMD1	chr8_3396300.0_3396319.0	TGGTACTCGCCGATCAGTG
sg022247	CSMD1	chr8_3214486.0_3214505.0	GTGCACTCACCATTGCAGG
sg022248	CSMD1	chr8_2950325.0_2950344.0	GGCATTTACAAGAAGGAGG
sg022255	CSMD3	chr8_112636832.0_112636851.0	AGGTGCACTCCACACTCGT
sg022256	CSMD3	chr8_112682586.0_112682605.0	AATACCAATCAATGCACGG
sg022257	CSMD3	chr8_113173843.0_113173862.0	ATGGCACAAGATTCGACGT
sg022258	CSMD3	chr8_112517195.0_112517214.0	ACTGCGTGTCGTGACCCAG
sg022259	CSMD3	chr8_112318830.0_112318849.0	GAATACCTTGACAAACTGG
sg022260	CSMD3	chr8_112292590.0_112292609.0	CTTATGCAAGGGCCAACAA
sg022261	CSN1S1	chr4_69935928.0_69935947.0	ATACCATTAGAATCAAGAG
sg022262	CSN1S1	chr4_69937123.0_69937142.0	ACTAGGAATGAGTCTACTC
sg022263	CSN1S1	chr4_69939187.0_69939206.0	AGCATCAGTTCATCGAGTG
sg022264	CSN1S1	chr4_69934220.0_69934239.0	GGCGTTCTGGGTATCTAAG
sg022265	CSN1S1	chr4_69944880.0_69944899.0	TACCAAACAGCATAGGGGT
sg022266	CSN1S1	chr4_69932564.0_69932583.0	CTCATTCTCACCTGTCTTG
sg022273	CSN3	chr4_70249141.0_70249160.0	GGTTTGCATAATATGTGCG
sg022274	CSN3	chr4_70249101.0_70249120.0	TGCTATAGCTGGTCTACGT
sg022275	CSN3	chr4_70249255.0_70249274.0	GGGGGATGGCAATAAATGA
sg022276	CSN3	chr4_70249225.0_70249244.0	TTGGGCGACGTACCACAGT
sg022277	CSN3	chr4_70249176.0_70249195.0	ACATGCCCAAATTCCTCAG
sg022278	CSN3	chr4_70244863.0_70244882.0	TTAACTTACCAAAAAAGGC
sg022339	CSNK2B	chr6_GL000254v2_alt_3010966.0_3010985.0	AGTTGGAAAAGTACCAGCA
sg022340	CSNK2B	chr6_GL000254v2_alt_3010464.0_3010483.0	ATCAATCCATAAAGCATCT
sg022341	CSNK2B	chr6_GL000254v2_alt_3009798.0_3009817.0	TAGAGCTTGTCGATAGTGA
sg022342	CSNK2B	chr6_GL000254v2_alt_3011236.0_3011255.0	GTACACATCCATGCACTTG
sg022343	CSNK2B	chr6_GL000254v2_alt_3008700.0_3008719.0	AAGATGAGCAGCTCAGAGG
sg022344	CSNK2B	chr6_GL000254v2_alt_3009772.0_3009791.0	CTTACTGGACTCAATGAGC
sg022710	CTCF	chr16_67611459.0_67611478.0	AGCAAACTGCGTTATACAG
sg022711	CTCF	chr16_67610950.0_67610969.0	TACCCCAGAACCAGACGGA
sg022712	CTCF	chr16_67611997.0_67612016.0	GATCCAAATTTGAACGCCG
sg022713	CTCF	chr16_67620756.0_67620775.0	TTGTGCAGTTATGCCAGCA
sg022714	CTCF	chr16_67628387.0_67628406.0	CACAAGCGCACCCACACCG
sg022715	CTCF	chr16_67628507.0_67628526.0	TAGAACAGACAAAAGCCGC
sg022932	CTSG	chr14_24574700.0_24574719.0	TGGTCCGCTGATTATATTG
sg022933	CTSG	chr14_24574357.0_24574376.0	GGAACAGATACACTCCGAG
sg022934	CTSG	chr14_24574459.0_24574478.0	AATCGAAACGTGAACCCAG
sg022935	CTSG	chr14_24575350.0_24575369.0	CTGAAGATACGCCATGTAG
sg022936	CTSG	chr14_24573681.0_24573700.0	TGTTGTCCTTATCCAGGGC
sg022937	CTSG	chr14_24574676.0_24574695.0	AATGACATCATGTTATTGC
sg023170	CX3CL1	chr16_57379643.0_57379662.0	GTTGCATTTCGTCACACCG
sg023171	CX3CL1	chr16_57382118.0_57382137.0	CTGCCCTAACTCGAAATGG
sg023172	CX3CL1	chr16_57382312.0_57382331.0	AGGAACCAGTCACGCCCGT
sg023173	CX3CL1	chr16_57382544.0_57382563.0	GACGGAGCATTCTCCTCTG
sg023174	CX3CL1	chr16_57382144.0_57382163.0	TTCGAGAAGCAGATCGGCG
sg023175	CX3CL1	chr16_57372608.0_57372627.0	ACAGTCAGATGGCAGAAGG
sg023236	CXCL2	chr4_74098858.0_74098877.0	TTGAGGTGAATTCCCTGCA
sg023237	CXCL2	chr4_74098895.0_74098914.0	AGCGCAGTTCAGTGGCCAG
sg023238	CXCL2	chr4_74098841.0_74098860.0	AAGAACATCCAAAGTGTGA
sg023239	CXCL2	chr4_74099044.0_74099063.0	CTGCTGCTCCTGCTCCTGG
sg023240	CXCL2	chr4_74098786.0_74098805.0	GGCGAGACTTACATGACTT
sg023241	CXCL2	chr4_74098626.0_74098645.0	CTTAACCATGGGCGATGCG
sg023242	CXCL3	chr4_74038385.0_74038404.0	CAGCGCAGTTCAGTGACCA
sg023243	CXCL3	chr4_74038319.0_74038338.0	GTGTGAATGTAAGGTCCCC
sg023244	CXCL3	chr4_74038364.0_74038383.0	AGTGCTTGCAGACACTGCA
sg023245	CXCL3	chr4_74038510.0_74038529.0	CCTGCTGCGCGCCGGCTGG
sg023246	CXCL3	chr4_74038118.0_74038137.0	CTGAACCATGGGGGATGCG
sg023247	CXCL3	chr4_74038503.0_74038522.0	GGACCCACCTGCTGCGCGC
sg023509	CYC1	chr8_144096202.0_144096221.0	GTGGGCGTGTGCTACACGG
sg023510	CYC1	chr8_144096411.0_144096430.0	AAACCATACCCCAACAGTG
sg023511	CYC1	chr8_144095842.0_144095861.0	AGGCCAGACTTCGACGACA
sg023512	CYC1	chr8_144096723.0_144096742.0	ATGTCTTAGAGTTTGACGA
sg023513	CYC1	chr8_144096581.0_144096600.0	AGTCCTCACCACCATGCCT
sg023514	CYC1	chr8_144096111.0_144096130.0	CCCTCCCTCCAGCATCCGG
sg024031	DACT2	chr6_168311261.0_168311280.0	GGCTGAGACAACAGGACAT
sg024032	DACT2	chr6_168310278.0_168310297.0	TAGTCTCATCAACCGACCG
sg024033	DACT2	chr6_168308632.0_168308651.0	GTGGCTGGAGTACAGACGG
sg024034	DACT2	chr6_168308877.0_168308896.0	CTTAGTCAGGACAAACAGG
sg024035	DACT2	chr6_168308195.0_168308214.0	GCCTGTCCAGTAGAAGCAG
sg024036	DACT2	chr6_168307740.0_168307759.0	CTCGGCCGAGTGTGACCCG
sg024403	DCC	chr18_52752295.0_52752314.0	GAGGGACTTTACCAATGTG
sg024404	DCC	chr18_53397434.0_53397453.0	CACATACCTGCTTCATACG
sg024405	DCC	chr18_53066051.0_53066070.0	AGCAACTTACGGATACTTG
sg024406	DCC	chr18_53391726.0_53391745.0	CCTACTGGTGGGAGCATGG
sg024407	DCC	chr18_53322111.0_53322130.0	CAGTATACCAGTTGGAAGG
sg024408	DCC	chr18_52925349.0_52925368.0	AAGACTGTGAGCTCTGCAG
sg024543	DCT	chr13_94462141.0_94462160.0	TCATAGGTTCCATTGCACA
sg024544	DCT	chr13_94468860.0_94468879.0	TGTGGTGATCACGTAGTCG
sg024545	DCT	chr13_94479159.0_94479178.0	CACCGTCATGCAGACTCGG
sg024546	DCT	chr13_94465708.0_94465727.0	TGTACAGACCAGCTGTTTG
sg024547	DCT	chr13_94460147.0_94460166.0	GGAATGAACCAAATTATGA
sg024548	DCT	chr13_94478961.0_94478980.0	TGTGCACTTGCAGGTCCGG
sg025093	DEFB1	chr8_6870810.0_6870829.0	CAGGTGGTAACTTTCTCAC
sg025094	DEFB1	chr8_6870779.0_6870798.0	ATTGTAATGATCAGATCTG
sg025095	DEFB1	chr8_6870768.0_6870787.0	ATTACAATTGCGTCAGCAG
sg025096	DEFB1	chr8_6870700.0_6870719.0	GGCACCTGTTACAGAGGGA
sg025097	DEFB1	chr8_6877825.0_6877844.0	AGAGTAAACAGCAGAAGGT
sg025098	DEFB1	chr8_6877821.0_6877840.0	GCAGAGAGTAAACAGCAGA
sg025235	DEFB132	chr20_259199.0_259218.0	AGGTCAGGCTTCGGCAGGA
sg025236	DEFB132	chr20_259137.0_259156.0	CAATGCTGTCTCCCCCCAG
sg025237	DEFB132	chr20_257809.0_257828.0	ACCTGGGTCAGGAATCCGA
sg025238	DEFB132	chr20_259112.0_259131.0	CATGTCCTGCAGTATCCTG
sg025239	DEFB132	chr20_257810.0_257829.0	CACCTGGGTCAGGAATCCG
sg025240	DEFB132	chr20_259094.0_259113.0	AATGTGTGAGTAACACCCC
sg025444	DES	chr2_219420292.0_219420311.0	AGAATTGAATCTCTCAACG
sg025445	DES	chr2_219420609.0_219420628.0	GAAATGTTCTTAGCCGCGA
sg025446	DES	chr2_219418906.0_219418925.0	AGAGCTCGGCCACTCGCGT
sg025447	DES	chr2_219418616.0_219418635.0	CGCGACACCTGGTACACGC
sg025448	DES	chr2_219420638.0_219420657.0	GAGTGGTACAAGTCGAAGG
sg025449	DES	chr2_219421438.0_219421457.0	CGGCACCTCAAGGATGAGA
sg025872	DICER1	chr14_95106182.0_95106201.0	CAGCTACATAAAATCGATG
sg025873	DICER1	chr14_95129586.0_95129605.0	CAGTTAGTCCCAAAATGCG
sg025874	DICER1	chr14_95115711.0_95115730.0	TGTTGAGGCCTGACGATGG
sg025875	DICER1	chr14_95103895.0_95103914.0	TCAACGTGGAGCTTACCAG
sg025876	DICER1	chr14_95099838.0_95099857.0	GAGGAAGCCAATTCACAGG
sg025877	DICER1	chr14_95108392.0_95108411.0	TGAACTCAACTTTAGAAGG
sg025878	DIDO1	chr20_62911150.0_62911169.0	ACTATCGGAGGTGTCATCG
sg025879	DIDO1	chr20_62895072.0_62895091.0	ATCTAAAGAGCTTTCCACG
sg025880	DIDO1	chr20_62907234.0_62907253.0	AGAAACTTCATTGTCGCTG
sg025881	DIDO1	chr20_62896755.0_62896774.0	GCTGAAGCACCACTCGATG
sg025882	DIDO1	chr20_62910772.0_62910791.0	CCAGCCTCACAACAACAGG
sg025883	DIDO1	chr20_62911581.0_62911600.0	GGCGACCCGAGCAATGAGG
sg026130	DLK1	chr14_100728421.0_100728440.0	CCCCAAAATGGATTCTGCG
sg026131	DLK1	chr14_100734233.0_100734252.0	GGCAATTTCTGCGAGATCG
sg026132	DLK1	chr14_100734364.0_100734383.0	GGCGCAGTTGGTCACCGGG
sg026133	DLK1	chr14_100734426.0_100734445.0	AGACACTCGTAGCTCACCT
sg026134	DLK1	chr14_100732128.0_100732147.0	TCCTTTCCCGAGTACCCGG
sg026135	DLK1	chr14_100734627.0_100734646.0	AAACCCCTCTCCTCACCGA
sg026136	DLK2	chr6_43451102.0_43451121.0	GAAGCGGTTTATGCCGTCA
sg026137	DLK2	chr6_43454751.0_43454770.0	CTCCCGGTCAGCCTGTCCG
sg026138	DLK2	chr6_43453053.0_43453072.0	CGGTACCTGCCACCAGCCA
sg026139	DLK2	chr6_43452023.0_43452042.0	GCCAGTGCATGTATGACGG
sg026140	DLK2	chr6_43452024.0_43452043.0	GGCCAGTGCATGTATGACG
sg026141	DLK2	chr6_43450743.0_43450762.0	AGGGCCCCAAACACCACCA
sg026226	DMD	chrX_32472198.0_32472217.0	AGTCGGTGACACTAAGTTG
sg026227	DMD	chrX_32362924.0_32362943.0	CTGAATGACATACGCCCAA
sg026228	DMD	chrX_32287530.0_32287549.0	AATGTACAAGGACCGACAA
sg026229	DMD	chrX_32697978.0_32697997.0	TCACGGTCAGTCTAGCACA
sg026230	DMD	chrX_31206654.0_31206673.0	TAATAGGGGACGAACAGGG
sg026231	DMD	chrX_31182879.0_31182898.0	AATAAGCCAGAGATCGAAG
sg026382	DNAH11	chr7_21591394.0_21591413.0	CGCACACAGAAAAACGTGA
sg026383	DNAH11	chr7_21739619.0_21739638.0	GTCGCCTGCATGAATCCGA
sg026384	DNAH11	chr7_21619131.0_21619150.0	GGCAGATTTGTTAGCACTG
sg026385	DNAH11	chr7_21655955.0_21655974.0	AAGCCGAGTGTGAATGTGT
sg026386	DNAH11	chr7_21616271.0_21616290.0	GAACTCAGAAGGTTTGCCA
sg026387	DNAH11	chr7_21725824.0_21725843.0	AGCTGACTTCAGTCGGTGG
sg026418	DNAH5	chr5_13824294.0_13824313.0	AACTGACAGAATGTTACGC
sg026419	DNAH5	chr5_13840989.0_13841008.0	ATTGATAGACGTCACCACG
sg026420	DNAH5	chr5_13862587.0_13862606.0	GAAATCATCGCCAACATGG
sg026421	DNAH5	chr5_13885036.0_13885055.0	GTTACAAGGAATACACTAG
sg026422	DNAH5	chr5_13809110.0_13809129.0	ATAGAACCATACTCTGGGG
sg026423	DNAH5	chr5_13762873.0_13762892.0	AAAGACACAATCAATGAAG
sg026424	DNAH6	chr2_84547381.0_84547400.0	CAAGTCATACGGCTAGCAG
sg026425	DNAH6	chr2_84573482.0_84573501.0	ATGCGGGCTGATTCAAATG
sg026426	DNAH6	chr2_84634594.0_84634613.0	ATGAGTTGCTGCGCGATGA
sg026427	DNAH6	chr2_84621291.0_84621310.0	TGCCATCGCTGACTATCAG
sg026428	DNAH6	chr2_84637214.0_84637233.0	TAGATTCATGTTTGAGGGG
sg026429	DNAH6	chr2_84672406.0_84672425.0	GCCGAAGTAATTCAATCGG
sg026436	DNAH8	chr6_38822844.0_38822863.0	TGAAGAAGCTATTCCTGCG
sg026437	DNAH8	chr6_38870522.0_38870541.0	TTTGATTAACCATCCACCC
sg026438	DNAH8	chr6_38883875.0_38883894.0	AGAACAATTGAAAGCTACG
sg026439	DNAH8	chr6_38786776.0_38786795.0	GGATGTCGCACAAAAAGCG
sg026440	DNAH8	chr6_38923125.0_38923144.0	GAGTGGAGAAAAAATCCGG
sg026441	DNAH8	chr6_38870426.0_38870445.0	CAGGTCATTGATTAAGCTG
sg026442	DNAH9	chr17_11727877.0_11727896.0	TTTAATCGAATCTCCGTGG
sg026443	DNAH9	chr17_11689788.0_11689807.0	CCCTGGAGGAATATCAACG
sg026444	DNAH9	chr17_11752902.0_11752921.0	TGGCGACATAGATCCAATG
sg026445	DNAH9	chr17_11784426.0_11784445.0	AGGGCCAGATCGATCAGTG
sg026446	DNAH9	chr17_11783738.0_11783757.0	CTCCTGTACCTGAAGCCGG
sg026447	DNAH9	chr17_11689999.0_11690018.0	ATAGTGAAGCTCACACCGG
sg026769	DNASE1L3	chr3_58201054.0_58201073.0	TTAACGGATGTCTCTGGGG
sg026770	DNASE1L3	chr3_58201008.0_58201027.0	CACGGACGTGAAACACCGC
sg026771	DNASE1L3	chr3_58204830.0_58204849.0	ACTACCATGACTATCAGGA
sg026772	DNASE1L3	chr3_58205517.0_58205536.0	CAACTATGTGATTAGCTCT
sg026773	DNASE1L3	chr3_58200998.0_58201017.0	AAACACCGCTGGAAGGCGG
sg026774	DNASE1L3	chr3_58204859.0_58204878.0	AAAGCTGGTGTCTGTGAAG
sg026847	DNMT3A	chr2_25248038.0_25248057.0	GATGACGAGCCAGAGTACG
sg026848	DNMT3A	chr2_25246743.0_25246762.0	CGGGAACAGCTTCCCCGCG
sg026849	DNMT3A	chr2_25244614.0_25244633.0	CGTACCAGTACGACGACGA
sg026850	DNMT3A	chr2_25244229.0_25244248.0	CGGGCACAAGGGTACCTAC
sg026851	DNMT3A	chr2_25240325.0_25240344.0	CATGGGCGTTAGTGACAAG
sg026852	DNMT3A	chr2_25247115.0_25247134.0	CACTGCAAAACGAGCTCAG
sg027187	DPP6	chr7_154446221.0_154446240.0	GGGGAGTAACCCTCCGCAG
sg027188	DPP6	chr7_154475000.0_154475019.0	TTCAAAATTCATGACCCCG
sg027189	DPP6	chr7_154769550.0_154769569.0	AAGCCCTACCACTATCCCA
sg027190	DPP6	chr7_154801426.0_154801445.0	GGGAAATTCTATCACATCA
sg027191	DPP6	chr7_154446307.0_154446326.0	GGTGTCAGAAGTATGACCG
sg027192	DPP6	chr7_154887678.0_154887697.0	TACCTCTCGGAAAACGCAG
sg027247	DPT	chr1_168729106.0_168729125.0	TAATCGCCATACTGGCCCC
sg027248	DPT	chr1_168714279.0_168714298.0	CAGCACTGACTCGAAGTAG
sg027249	DPT	chr1_168728980.0_168728999.0	TTGCTGAAGATGCTCCTCA
sg027250	DPT	chr1_168729062.0_168729081.0	GACTACAGCGATGATGGGT
sg027251	DPT	chr1_168701049.0_168701068.0	ATTATGATTACTATATCCG
sg027252	DPT	chr1_168714213.0_168714232.0	GACTCACCAGCAGGAATAT
sg027373	DRD2	chr11_113416864.0_113416883.0	TCTTCGGACTCAATAACGC
sg027374	DRD2	chr11_113424419.0_113424438.0	CTGATCGTCAGCCTCGCAG
sg027375	DRD2	chr11_113416958.0_113416977.0	AGCGCGTATTGTACAGCAT
sg027376	DRD2	chr11_113424536.0_113424555.0	TGGCATAGTAGTTGTAGTG
sg027377	DRD2	chr11_113410808.0_113410827.0	ACATAGCCCAGCCACGTGA
sg027378	DRD2	chr11_113415477.0_113415496.0	TCGCTTGCGGCGTCTGCGG
sg027490	DSG1	chr18_31338400.0_31338419.0	AACAGTACAATATGCTCGG
sg027491	DSG1	chr18_31329981.0_31330000.0	TAGCCATTGAAAACACTGG
sg027492	DSG1	chr18_31333683.0_31333702.0	GATATTATCATTGACATCG
sg027493	DSG1	chr18_31328257.0_31328276.0	TGACAAAGATCCCATATGG
sg027494	DSG1	chr18_31354615.0_31354634.0	GTGCTCTCAGAAATTACTG
sg027495	DSG1	chr18_31329914.0_31329933.0	AATGGGCCAAGATTTAGAG
sg027532	DST	chr6_56639930.0_56639949.0	AAAGAAGCTAAAATCAGTG
sg027533	DST	chr6_56620009.0_56620028.0	CCAGTGTGTCCGATCACAC
sg027534	DST	chr6_56634139.0_56634158.0	AGAATTCGAGCTAGCAATG
sg027535	DST	chr6_56625236.0_56625255.0	TTACAAACAATGACCTACC
sg027536	DST	chr6_56501152.0_56501171.0	CATGGCTGACACACACCGA
sg027537	DST	chr6_56636558.0_56636577.0	GAGAACACAGCGTATTTCG
sg028382	EDN3	chr20_59301675.0_59301694.0	TGTGTCTACTATTGCCACC
sg028383	EDN3	chr20_59301468.0_59301487.0	ACTGCAGCCAGATCTGAGG
sg028384	EDN3	chr20_59301622.0_59301641.0	CTGGATCGGTGGTGCTCAG
sg028385	EDN3	chr20_59321029.0_59321048.0	TGTAGTTGGACAGTCCATA
sg028386	EDN3	chr20_59322387.0_59322406.0	GAAAAAACAGACAAAGAAG
sg028387	EDN3	chr20_59322431.0_59322450.0	CAGAGGCCTGTGTCAAAGG
sg028484	EFCAB1	chr8_48729775.0_48729794.0	CTTCTCAAACAGCCATCTG
sg028485	EFCAB1	chr8_48729823.0_48729842.0	GACGGATTCATTTCAAAGG
sg028486	EFCAB1	chr8_48730637.0_48730656.0	CTCTCCCTTTAGTATTCCG
sg028487	EFCAB1	chr8_48730594.0_48730613.0	CTGTGTAAATGTATTGGAG
sg028488	EFCAB1	chr8_48731349.0_48731368.0	ATGACATGATTATGGACAG
sg028489	EFCAB1	chr8_48729073.0_48729092.0	GAAGAGACTCTTCTACTGG
sg028704	EGFR	chr7_55161573.0_55161592.0	CTTGCCGGAATGTCAGCCG
sg028705	EGFR	chr7_55173924.0_55173943.0	TGGAGCCTCTTACACCCAG
sg028706	EGFR	chr7_55165373.0_55165392.0	TCTGCGTACTTCCAGACCA
sg028707	EGFR	chr7_55142391.0_55142410.0	GGAAATTACCTATGTGCAG
sg028708	EGFR	chr7_55155873.0_55155892.0	GGGGCCGACAGCTATGAGA
sg028709	EGFR	chr7_55155929.0_55155948.0	AGGGCCTTGCCGCAAAGGT
sg029166	EIF6	chr20_35284401.0_35284420.0	CCGATCGCTACCAGACAGT
sg029167	EIF6	chr20_35280678.0_35280697.0	GCCACGTAGTCATTGCAGG
sg029168	EIF6	chr20_35284209.0_35284228.0	GATAGACGCGTGCACCACG
sg029169	EIF6	chr20_35280736.0_35280755.0	GACACAGTGCAGATTAGGC
sg029170	EIF6	chr20_35279641.0_35279660.0	AGCACAGAGCTGTCAGTGG
sg029171	EIF6	chr20_35284377.0_35284396.0	CAGAGAACTTCTACAGGTG
sg029238	ELF5	chr11_34493480.0_34493499.0	TCCAGAACATCCGCACACA
sg029239	ELF5	chr11_34493538.0_34493557.0	ACACAGGAGGAGTTCGTCG
sg029240	ELF5	chr11_34493665.0_34493684.0	CTTAGTCCAGTATTCAGGG
sg029241	ELF5	chr11_34505672.0_34505691.0	AGATCAGTCCACGACATCA
sg029242	ELF5	chr11_34505673.0_34505692.0	GATCAGTCCACGACATCAG
sg029243	ELF5	chr11_34480841.0_34480860.0	GTGGTTAAATCGGAAGCCC
sg029532	EMILIN3	chr20_41362119.0_41362138.0	TGTTGCTAGGCGCTCCTCG
sg029533	EMILIN3	chr20_41362811.0_41362830.0	TTAGGATCTCGTCTAAGGG
sg029534	EMILIN3	chr20_41362966.0_41362985.0	AAACATATGGTACCCTCAG
sg029535	EMILIN3	chr20_41366504.0_41366523.0	CGCTACAGTCTCTACACGA
sg029536	EMILIN3	chr20_41365060.0_41365079.0	ATACCGGCAGTGTAGATGG
sg029537	EMILIN3	chr20_41365107.0_41365126.0	GTGACCTGCATCCTACAGG
sg029860	EP300	chr22_41137740.0_41137759.0	TGGCACGAAGATATTACTC
sg029861	EP300	chr22_41149878.0_41149897.0	GTACGACTAGGTACAGGCG
sg029862	EP300	chr22_41158468.0_41158487.0	TGTAATAAGTGGCATCACG
sg029863	EP300	chr22_41125883.0_41125902.0	TGGTGAACCATAAGGATTG
sg029864	EP300	chr22_41176297.0_41176316.0	GATCAGGATCAACAATGGG
sg029865	EP300	chr22_41176821.0_41176840.0	AAATGGAGAAACTAGGCCT
sg029920	EPB42	chr15_43208728.0_43208747.0	GGCAAACGTGGTCACCACG
sg029921	EPB42	chr15_43216307.0_43216326.0	AAATGCACGGACTGGAGCG
sg029922	EPB42	chr15_43209368.0_43209387.0	CCTTGCTGAACAAGCGCCG
sg029923	EPB42	chr15_43210433.0_43210452.0	TGATCCTTAACAGTTCGAG
sg029924	EPB42	chr15_43210432.0_43210451.0	GATCCTTAACAGTTCGAGG
sg029925	EPB42	chr15_43216352.0_43216371.0	CTGCCCCCTCCTCACAAAG
sg030016	EPHB1	chr3_134951543.0_134951562.0	GGATCCTGGGACATTAGGG
sg030017	EPHB1	chr3_135154194.0_135154213.0	GAGGAGCATCACCTTGTCA
sg030018	EPHB1	chr3_135162129.0_135162148.0	CTGGCTACGGCAAGTTCAG
sg030019	EPHB1	chr3_135106551.0_135106570.0	CGGACCGGTTATTACCGAG
sg030020	EPHB1	chr3_135154255.0_135154274.0	GAGATCCGGTACTATGAGA
sg030021	EPHB1	chr3_135248426.0_135248445.0	TGACAATCTCCGCAAACCG
sg030234	ERBB3	chr12_56093841.0_56093860.0	GTCGAAATTATAGCCGAGG
sg030235	ERBB3	chr12_56085051.0_56085070.0	CCATTGCCCAACCTCCGCG
sg030236	ERBB3	chr12_56095780.0_56095799.0	TGAGGCGATACTTGGAACG
sg030237	ERBB3	chr12_56097160.0_56097179.0	TCATGTGAGACAACACCGG
sg030238	ERBB3	chr12_56083894.0_56083913.0	GGCTCACTAACCTGCAGGA
sg030239	ERBB3	chr12_56083821.0_56083840.0	CTCTACGAGAGGTGTGAGG
sg030240	ERBB4	chr2_211561904.0_211561923.0	TGGTGTGTCCAGATAGCTA
sg030241	ERBB4	chr2_211679098.0_211679117.0	GCGGCGACACGACAGACAT
sg030242	ERBB4	chr2_211704106.0_211704125.0	TAGAGTACTCTTCCACCAA
sg030243	ERBB4	chr2_211665398.0_211665417.0	TGTCCAGATGGCTTACAGG
sg030244	ERBB4	chr2_211619199.0_211619218.0	AATGAGACAACTGGTCCCA
sg030245	ERBB4	chr2_212124861.0_212124880.0	CTGAGCTCTCTCTCTGACC
sg030573	ESR1	chr6_151842604.0_151842623.0	CAGATAATCGACGCCAGGG
sg030574	ESR1	chr6_151808117.0_151808136.0	TGACCGTAGACCTGCGCGT
sg030575	ESR1	chr6_151808026.0_151808045.0	CCAGGTACACCTCGCCCAG
sg030576	ESR1	chr6_151944384.0_151944403.0	ACTCGGAATAGAGTATCGG
sg030577	ESR1	chr6_151944479.0_151944498.0	CATGATCAACTGGGCGAAG
sg030578	ESR1	chr6_152098783.0_152098802.0	CCAGCAGCAGGTCATAGAG
sg030986	EXOSC6	chr16_70251365.0_70251384.0	GGCGTGGAGATGTACGACC
sg030987	EXOSC6	chr16_70251610.0_70251629.0	AGCAGGCGACCGCGCAGCG
sg030988	EXOSC6	chr16_70251685.0_70251704.0	GCCTGTCGCGGGCCCGACA
sg030989	EXOSC6	chr16_70251830.0_70251849.0	CGTCGGCCGCGTACAGCTG
sg030990	EXOSC6	chr16_70251236.0_70251255.0	ATGCCTGTGCTGAATCAGG
sg030991	EXOSC6	chr16_70251300.0_70251319.0	CTGGCTCCTGGACCCCACG
sg031094	F10	chr13_113147384.0_113147403.0	CTCATCAATGAGGAAAACG
sg031095	F10	chr13_113148977.0_113148996.0	AAGCACAACCGGTTCACAA
sg031096	F10	chr13_113140970.0_113140989.0	CACAGAGTTCTGTTCCTCG
sg031097	F10	chr13_113139397.0_113139416.0	AAATGTAAAGACGGCCTCG
sg031098	F10	chr13_113149391.0_113149410.0	AAGTACGGGATCTACACCA
sg031099	F10	chr13_113139414.0_113139433.0	GGTGCAGGTGTATTCCCCG
sg031250	FABP4	chr8_81479489.0_81479508.0	ACACCCCCATCTAAGGTTA
sg031251	FABP4	chr8_81480471.0_81480490.0	CTGAGATTTCCTTCATACT
sg031252	FABP4	chr8_81480532.0_81480551.0	ATGATCATCAGTGTGAATG
sg031253	FABP4	chr8_81479495.0_81479514.0	GCACCATAACCTTAGATGG
sg031254	FABP4	chr8_81480564.0_81480583.0	ATGCCAGCCACTTTCCTGG
sg031255	FABP4	chr8_81479465.0_81479484.0	TACATGTGCAGAAATGGGA
sg031268	FABP7	chr6_122779831.0_122779850.0	TCATCAAAGTTCTGACTGT
sg031269	FABP7	chr6_122780334.0_122780353.0	CTTGACTGATAATTACCGT
sg031270	FABP7	chr6_122780379.0_122780398.0	CTCAGCACATTCAAGAACA
sg031271	FABP7	chr6_122780296.0_122780315.0	GCTTTGCCACTAGGCAGGT
sg031272	FABP7	chr6_122781123.0_122781142.0	TTCACATACAGAAATGGGA
sg031273	FABP7	chr6_122780398.0_122780417.0	CGGAGATTAGTTTCCAGCT
sg031397	FAM107A	chr3_58567339.0_58567358.0	TGGCTTGCTGTCCACACCA
sg031398	FAM107A	chr3_58569791.0_58569810.0	CCGGCCAGAATACAGAGAG
sg031399	FAM107A	chr3_58567309.0_58567328.0	TGTCCTAGAGCACCGCCGG
sg031400	FAM107A	chr3_58569731.0_58569750.0	ACTCCGAGAGGCCTTCACG
sg031401	FAM107A	chr3_58566639.0_58566658.0	CTGACTTTAATAAACTCGG
sg031402	FAM107A	chr3_58567281.0_58567300.0	CTCATCAAGAAGAAGAAGG
sg031642	FAM135B	chr8_138152210.0_138152229.0	AAAGGTAAAGAGCTAATGG
sg031643	FAM135B	chr8_138151737.0_138151756.0	ATGCCTAAAGACTTGAATG
sg031644	FAM135B	chr8_138152810.0_138152829.0	TCAATGTAGGTCAGCACTG
sg031645	FAM135B	chr8_138152599.0_138152618.0	AAAGGGAATAGATCAAGAG
sg031646	FAM135B	chr8_138250932.0_138250951.0	GTGGTGCAGACCATTCCGG
sg031647	FAM135B	chr8_138197631.0_138197650.0	TGCTGCATGCAGTTCTCAG
sg031688	FAM150B	chr2_286323.0_286342.0	AATTGTTCCTCGAGATCTG
sg031689	FAM150B	chr2_287585.0_287604.0	CCTTCGCCGGAGCAGCGAG
sg031690	FAM150B	chr2_287691.0_287710.0	GGAACTCGTCCAGGAGCTG
sg031691	FAM150B	chr2_287665.0_287684.0	ACCACTCGGCGGAGCACAA
sg031969	FAM180B	chr11_47588096.0_47588115.0	AACTAGCGTCCACACACCC
sg031970	FAM180B	chr11_47586821.0_47586840.0	GGTTGTAGTCACACCAGAG
sg031971	FAM180B	chr11_47588215.0_47588234.0	AGTCCCAAGTGCTAAGAGG
sg031972	FAM180B	chr11_47587756.0_47587775.0	CCATGGACAGCACCAGCGT
sg031973	FAM180B	chr11_47588264.0_47588283.0	GCGTGGAGCCGGTAGACGC
sg031974	FAM180B	chr11_47588358.0_47588377.0	GGGGCAGAAACCTTTGCAC
sg032042	FAM189A2	chr9_69377443.0_69377462.0	CCTCCAGATATTCGCAACC
sg032043	FAM189A2	chr9_69377710.0_69377729.0	GGTGTGCACGAGTAAAACG
sg032044	FAM189A2	chr9_69371552.0_69371571.0	TTTATCCTAGGCTGCCAAG
sg032045	FAM189A2	chr9_69385857.0_69385876.0	CTTCTGATAGGACGCACCA
sg032046	FAM189A2	chr9_69371597.0_69371616.0	TGCTTACCAGATCACACCT
sg032047	FAM189A2	chr9_69388214.0_69388233.0	CTGCAGTGACTCTGAGGAG
sg032083	FAM196B	chr5_169883084.0_169883103.0	AGCCACACACCAGGCACAG
sg032084	FAM196B	chr5_169883685.0_169883704.0	GGGGAAGACTCAAGCAACC
sg032085	FAM196B	chr5_169883808.0_169883827.0	GAAACAACCTCACCACCGC
sg032086	FAM196B	chr5_169883175.0_169883194.0	TGGACGTGTGTCATCCAAA
sg032087	FAM196B	chr5_169883578.0_169883597.0	AAATGCTTCCTGAGACTGG
sg032088	FAM196B	chr5_169882640.0_169882659.0	GGCCGACTGCAATCTGTGG
sg032451	FAM3D	chr3_58637143.0_58637162.0	GTCCCTGGATCGTCGTAGG
sg032452	FAM3D	chr3_58645526.0_58645545.0	ATAGTAGGGCCCACGACGT
sg032453	FAM3D	chr3_58653737.0_58653756.0	CTTTGCCATAGTCACGACA
sg032454	FAM3D	chr3_58643693.0_58643712.0	GTCCTGTGAAAAACAATGT
sg032455	FAM3D	chr3_58636360.0_58636379.0	GTTCCTACGCAAAACAACT
sg032456	FAM3D	chr3_58634333.0_58634352.0	CAGACACAAACAAATACGA
sg032511	FAM47C	chrX_37010024.0_37010043.0	GAGATACGCTACTCTCAGG
sg032512	FAM47C	chrX_37010348.0_37010367.0	GGGACACTCCAGTATTGGG
sg032513	FAM47C	chrX_37008955.0_37008974.0	AGGGGAGAATTCCCCACAG
sg032514	FAM47C	chrX_37009593.0_37009612.0	GGAGACACTCCATTCTTGG
sg032515	FAM47C	chrX_37011199.0_37011218.0	TGCACAGCATGTGAAGATG
sg032516	FAM47C	chrX_37010880.0_37010899.0	TAAAAGAACTGTTTCAGGA
sg033086	FAT1	chr4_186620718.0_186620737.0	TAACCGTTAGAGCTTCCGA
sg033087	FAT1	chr4_186633796.0_186633815.0	TACGACAGTCACTTCGATG
sg033088	FAT1	chr4_186708077.0_186708096.0	ATTCCCAGAGATCTAGGCG
sg033089	FAT1	chr4_186618907.0_186618926.0	CTTGATCGAGAAACCCCGG
sg033090	FAT1	chr4_186708165.0_186708184.0	AAGGACTTCGACTTCCCGG
sg033091	FAT1	chr4_186603865.0_186603884.0	AGGTGATGAAAATCTCCAG
sg033092	FAT2	chr5_151566449.0_151566468.0	TTAACTGGTACCCACCGGG
sg033093	FAT2	chr5_151563522.0_151563541.0	GTAACTGAAGTCTACATCG
sg033094	FAT2	chr5_151568092.0_151568111.0	TTTGCATCGACCAGTACAG
sg033095	FAT2	chr5_151567160.0_151567179.0	ACTATGTCAGCCATAGATG
sg033096	FAT2	chr5_151566251.0_151566270.0	CGGTACATACTCAAGGTGG
sg033097	FAT2	chr5_151521775.0_151521794.0	TCAACGTCACGGTCAGCGA
sg033104	FAT4	chr4_125446288.0_125446307.0	TTAGTTATAGGATCATCGG
sg033105	FAT4	chr4_125317313.0_125317332.0	GACGGGACTTATCACGGTG
sg033106	FAT4	chr4_125320471.0_125320490.0	TTACTGGGACTAACAACCA
sg033107	FAT4	chr4_125449555.0_125449574.0	GTCCACCCAGAATCATGTG
sg033108	FAT4	chr4_125319273.0_125319292.0	AGCCAGCATGAACATCCAG
sg033109	FAT4	chr4_125319994.0_125320013.0	TTCATGTAAACATGTACAG
sg033584	FBXW7	chr4_152330758.0_152330777.0	CAGAATTGATACTAACTGG
sg033585	FBXW7	chr4_152350085.0_152350104.0	AGAGCGGACCTCAGAACCA
sg033586	FBXW7	chr4_152411606.0_152411625.0	TTGGAGTAGAACCTAGACC
sg033587	FBXW7	chr4_152328360.0_152328379.0	CATTAGTGGGACATACAGG
sg033588	FBXW7	chr4_152330753.0_152330772.0	TTGATACTAACTGGAGGCG
sg033589	FBXW7	chr4_152323010.0_152323029.0	ACCTAGTCACATTGGAGAG
sg033770	FDCSP	chr4_70231211.0_70231230.0	CAAGATGGCTGTGATCAGG
sg033771	FDCSP	chr4_70234027.0_70234046.0	CAGCGATGAATTAGCTTCA
sg033772	FDCSP	chr4_70234063.0_70234082.0	GCGAAATGGATATGGGTAA
sg033773	FDCSP	chr4_70234115.0_70234134.0	GAAAATTACGTCTAAACCA
sg033774	FDCSP	chr4_70231215.0_70231234.0	ATCACAGCCATCTTGGCAG
sg033775	FDCSP	chr4_70234026.0_70234045.0	ACAGCGATGAATTAGCTTC
sg034004	FGF10	chr5_44388430.0_44388449.0	AGAGAATAGCTTTCTCCAG
sg034005	FGF10	chr5_44388398.0_44388417.0	TTCTCAAGATTGAGAAGAA
sg034006	FGF10	chr5_44388481.0_44388500.0	CAGCGCGGGAAGGCATGTG
sg034007	FGF10	chr5_44388545.0_44388564.0	GACACCATGTCCTGACCAA
sg034008	FGF10	chr5_44305102.0_44305121.0	TAACTGGCAGCATAATGGG
sg034009	FGF10	chr5_44305073.0_44305092.0	ATGTGGCATTGAATGGAAA
sg034052	FGF2	chr4_122826827.0_122826846.0	GGTGCCAGATTAGCGGACG
sg034053	FGF2	chr4_122827245.0_122827264.0	CCACTTCAAGGACCCCAAG
sg034054	FGF2	chr4_122826916.0_122826935.0	TCACGGATGGGTGTCTCCG
sg034055	FGF2	chr4_122827317.0_122827336.0	CTCCCGGACCCCGTCAACT
sg034056	FGF2	chr4_122827264.0_122827283.0	CGGCTGTACTGCAAAAACG
sg034057	FGF2	chr4_122827310.0_122827329.0	ACCCCGTCAACTCGGCCGT
sg034124	FGFBP1	chr4_15936174.0_15936193.0	GAGCTGACTAGCTTAAGAC
sg034125	FGFBP1	chr4_15936281.0_15936300.0	CTATTGGAAACAAGTTGCC
sg034126	FGFBP1	chr4_15936424.0_15936443.0	GACCAAGCCAACTGCAGAT
sg034127	FGFBP1	chr4_15936504.0_15936523.0	CAGAACAAAAGGACACTCT
sg034128	FGFBP1	chr4_15936388.0_15936407.0	GAGGAGGGCATCTCTCTCA
sg034129	FGFBP1	chr4_15936014.0_15936033.0	CCCAGATATGGCAAACCAG
sg034130	FGFBP2	chr4_15962902.0_15962921.0	CCCCTGTACTCACACCAGT
sg034131	FGFBP2	chr4_15962983.0_15963002.0	CTGCTGGGACGCATAGTGC
sg034132	FGFBP2	chr4_15962782.0_15962801.0	ACGGATGGCCTAAGCACCG
sg034133	FGFBP2	chr4_15962847.0_15962866.0	TTGATTCCAGTAAGGTTTG
sg034134	FGFBP2	chr4_15962904.0_15962923.0	CTACTGGTGTGAGTACAGG
sg034135	FGFBP2	chr4_15963090.0_15963109.0	GGACAAGGTCACCAGCAGG
sg034238	FHL1	chrX_136208449.0_136208468.0	TCTAGGCCATCACATCTGG
sg034239	FHL1	chrX_136206558.0_136206577.0	TGCCGCAAGCCCATCGGTG
sg034240	FHL1	chrX_136207122.0_136207141.0	GTGCAACAAGTGCACCACT
sg034241	FHL1	chrX_136207795.0_136207814.0	TCAAAACGTGGAGTACAAG
sg034242	FHL1	chrX_136209868.0_136209887.0	GGAGCCTTTACCAAACCCT
sg034243	FHL1	chrX_136209385.0_136209404.0	AAAGAACCACCACCCACGA
sg034304	FIGF	chrX_15363284.0_15363303.0	TGTTCAGATCGTTCCAATG
sg034305	FIGF	chrX_15358142.0_15358161.0	AGCCCTAGAGAAACGTGCG
sg034306	FIGF	chrX_15355184.0_15355203.0	AATTGAGTATGGATGGCGG
sg034307	FIGF	chrX_15358073.0_15358092.0	GGAACACGTTCACACAAGG
sg034494	FLG	chr1_152310356.0_152310375.0	TCTACTGATTGCTCGTGGT
sg034495	FLG	chr1_152307516.0_152307535.0	AGGCACTCAACGTCCCAAG
sg034496	FLG	chr1_152311111.0_152311130.0	GGGACAGGAACAATCATCG
sg034497	FLG	chr1_152313058.0_152313077.0	GGGCCAGGGACAATCATCG
sg034498	FLG	chr1_152312633.0_152312652.0	GTCAGGCCACTGACAGTGA
sg034499	FLG	chr1_152312415.0_152312434.0	CAAGGATCCCACCATGAGC
sg034530	FLNA	chrX_154357537.0_154357556.0	CCTGTCACGTCTGGCACGT
sg034531	FLNA	chrX_154359737.0_154359756.0	GTGGAGTACACGCCTTACG
sg034532	FLNA	chrX_154360317.0_154360336.0	GTCAAAGCAGGGAACCACG
sg034533	FLNA	chrX_154362513.0_154362532.0	GTCGATGTCAGCTTCGGCG
sg034534	FLNA	chrX_154352867.0_154352886.0	AAGGTGGACATCAACACAG
sg034535	FLNA	chrX_154361321.0_154361340.0	TGGGGGCCACAGCTTCCAG
sg034594	FLT4	chr5_180630550.0_180630569.0	TCACCTCTCACGAACACGT
sg034595	FLT4	chr5_180621865.0_180621884.0	ATCGAATCCAAGCCATCCG
sg034596	FLT4	chr5_180624011.0_180624030.0	CCCTCCAGTCACGGCACTG
sg034597	FLT4	chr5_180629254.0_180629273.0	ATACCATGCACAATGACCT
sg034598	FLT4	chr5_180620614.0_180620633.0	CATGTTACAGAAGATGAGG
sg034599	FLT4	chr5_180613092.0_180613111.0	GGGGCCTCCCCGTACCCTG
sg034630	FMN2	chr1_240092496.0_240092515.0	CTGTCGGATACCGAGTGTG
sg034631	FMN2	chr1_240093267.0_240093286.0	CAAGGACCTGACGCCCCCG
sg034632	FMN2	chr1_240207299.0_240207318.0	CGGTAGAAATAGAATGGGG
sg034633	FMN2	chr1_240177994.0_240178013.0	TAGGCGAGTTCCATCCATG
sg034634	FMN2	chr1_240330654.0_240330673.0	TTGGCAACTACATGAATGG
sg034635	FMN2	chr1_240092149.0_240092168.0	ATGCTTTGCACGAAGGCGG
sg034660	FMO2	chr1_171204004.0_171204023.0	AGAACAACAGATGAATCGG
sg034661	FMO2	chr1_171205538.0_171205557.0	AGTCAACCCTCGCGTGCAT
sg034662	FMO2	chr1_171203949.0_171203968.0	CGGAGCATAGAACGAAACC
sg034663	FMO2	chr1_171205317.0_171205336.0	TCCACAGAGTAGACGACTT
sg034664	FMO2	chr1_171196691.0_171196710.0	ACAACCTTCCATTGGCCAG
sg034665	FMO2	chr1_171207730.0_171207749.0	CATAGTTCTCTCTGAGGGC
sg034828	FOLR1	chr11_72192284.0_72192303.0	ATGAACGCCAAGCACCACA
sg034829	FOLR1	chr11_72195263.0_72195282.0	CATCCAGTGTCGACCCTGG
sg034830	FOLR1	chr11_72195419.0_72195438.0	GTTGGGGGAGCACTCGTAG
sg034831	FOLR1	chr11_72192200.0_72192219.0	CTGCTCCTTCTAGTGTGGG
sg034832	FOLR1	chr11_72195340.0_72195359.0	CAGTTGAATCTATATAGGT
sg034833	FOLR1	chr11_72195447.0_72195466.0	TGCATACCTGCTGGATCCA
sg034858	FOSB	chr19_45470617.0_45470636.0	TCACCCCGTAGGAGTGCGC
sg034859	FOSB	chr19_45471280.0_45471299.0	CTGACCGACCGACTCCAGG
sg034860	FOSB	chr19_45468650.0_45468669.0	GAAGACAGATATTGAGACT
sg034861	FOSB	chr19_45470775.0_45470794.0	CGTAGGGGTCGACGACCGG
sg034862	FOSB	chr19_45472878.0_45472897.0	GTGTACGAAGGGTTAACAA
sg034863	FOSB	chr19_45472598.0_45472617.0	GCCGAGCTCCAAAAGGAGA
sg034876	FOXA1	chr14_37592037.0_37592056.0	TCCGGGTGCAGCGTCCAGT
sg034877	FOXA1	chr14_37591883.0_37591902.0	GGCGCCAGAGGGGTCCTTG
sg034878	FOXA1	chr14_37592345.0_37592364.0	GGACGGCGCGTACGCCATG
sg034879	FOXA1	chr14_37592571.0_37592590.0	ACATGTCCTATGCCAACCC
sg034880	FOXA1	chr14_37592583.0_37592602.0	GACATGTTGAAGGACGCCG
sg034881	FOXA1	chr14_37592150.0_37592169.0	CTGGTTCTGCCGGTAATAG
sg035230	FRAS1	chr4_78337800.0_78337819.0	ACCAGCACAGTATCCCACG
sg035231	FRAS1	chr4_78421897.0_78421916.0	CTTGCGTGAAATACCGGAT
sg035232	FRAS1	chr4_78266867.0_78266886.0	CCCCGGTCACATATACACG
sg035233	FRAS1	chr4_78451775.0_78451794.0	TCCATGACTATATTCTACG
sg035234	FRAS1	chr4_78375820.0_78375839.0	AACACAGTTGTAAACACAG
sg035235	FRAS1	chr4_78439034.0_78439053.0	CAGCAAAAGCAATGACTGG
sg035248	FREM1	chr9_14801739.0_14801758.0	GCTAAACCCCCTATCGATG
sg035249	FREM1	chr9_14807981.0_14808000.0	TGATGTTGAGATCATACAC
sg035250	FREM1	chr9_14823223.0_14823242.0	CTGTCAGTAACCAACATGG
sg035251	FREM1	chr9_14848666.0_14848685.0	GTATTCCAGGATACACGGG
sg035252	FREM1	chr9_14746438.0_14746457.0	CAAATCCTGTCCAGCCGGG
sg035253	FREM1	chr9_14740188.0_14740207.0	CTCCAGGCAGCACATGCGG
sg035296	FRMD1	chr6_168064906.0_168064925.0	GGAGTCGGCCCATGCCGGG
sg035297	FRMD1	chr6_168066765.0_168066784.0	GCACTACGTGGAAAACGGA
sg035298	FRMD1	chr6_168078949.0_168078968.0	ACCCTGGGAATGGACGCGA
sg035299	FRMD1	chr6_168062919.0_168062938.0	CCAGTCCCAGGATCACGGT
sg035300	FRMD1	chr6_168061837.0_168061856.0	CAGAGTGGGCCGCACGCGG
sg035301	FRMD1	chr6_168064937.0_168064956.0	AGGTCAGCCTGCAGCGCGC
sg035476	FSIP2	chr2_185796593.0_185796612.0	TCAACCTGATTAACAGTGT
sg035477	FSIP2	chr2_185801496.0_185801515.0	TATACCGGATTATTACCAC
sg035478	FSIP2	chr2_185793650.0_185793669.0	TTTGCATTTATGACAAGCG
sg035479	FSIP2	chr2_185802670.0_185802689.0	GTTATATAGAGGTACACTC
sg035480	FSIP2	chr2_185739351.0_185739370.0	CACAAAACCCACTTTGCAG
sg035481	FSIP2	chr2_185794654.0_185794673.0	TGGCAGTTTCATTAAGTGG
sg035720	FXYD1	chr19_35140586.0_35140605.0	CTCTTTCCAGAAAGTCCAA
sg035721	FXYD1	chr19_35140096.0_35140115.0	CACACAGAAAACCAAGATG
sg035722	FXYD1	chr19_35141131.0_35141150.0	ACTACCAGTCCCTGCAGAT
sg035723	FXYD1	chr19_35140619.0_35140638.0	CCCGCTCACCGTAAGTGAA
sg035724	FXYD1	chr19_35141167.0_35141186.0	CCGGGATCCTCTTCATCCT
sg035725	FXYD1	chr19_35140608.0_35140627.0	AACACGACCCGTTCACTTA
sg035856	G0S2	chr1_209675723.0_209675742.0	ATGATGGCCCAGAAGCGCA
sg035857	G0S2	chr1_209675833.0_209675852.0	CACGGCCGCCAGACGTCTG
sg035858	G0S2	chr1_209675751.0_209675770.0	TGGTGAAGCTGTACGTGCT
sg035859	G0S2	chr1_209675787.0_209675806.0	CCGAGCACCACGCCGAAGA
sg035860	G0S2	chr1_209675841.0_209675860.0	TGGTCCCGCAGACGTCTGG
sg035861	G0S2	chr1_209675750.0_209675769.0	ATGGTGAAGCTGTACGTGC
sg036042	GABRE	chrX_151969667.0_151969686.0	CCATGTCTAGGATAGAGAG
sg036043	GABRE	chrX_151955521.0_151955540.0	CGAGAAAAGGTGCCCAACG
sg036044	GABRE	chrX_151955751.0_151955770.0	GAAACCCAGGAGAGCATCG
sg036045	GABRE	chrX_151959825.0_151959844.0	CTGGCACGCTTACCAACTG
sg036046	GABRE	chrX_151962614.0_151962633.0	TGGGAGAAGATGATGTCAA
sg036047	GABRE	chrX_151974559.0_151974578.0	GGAGACTCACCTCGACTGG
sg036066	GABRP	chr5_170789141.0_170789160.0	GGGAGTCAGTTCAACGTCG
sg036067	GABRP	chr5_170795220.0_170795239.0	CGCTGTCGGAGGTATATGG
sg036068	GABRP	chr5_170805794.0_170805813.0	TGCTCAGTACACCATAGAG
sg036069	GABRP	chr5_170809565.0_170809584.0	TAACACGGTCGTCACTCCT
sg036070	GABRP	chr5_170809664.0_170809683.0	AAAGCTAAAGCAGATCCCC
sg036071	GABRP	chr5_170797493.0_170797512.0	GATCTGTCTAAATACCCCA
sg036291	GALNT15	chr3_16200670.0_16200689.0	GTTACTCAGGAGCAACAAG
sg036292	GALNT15	chr3_16211191.0_16211210.0	ACTCTCTTATGTCGCTGCG
sg036293	GALNT15	chr3_16175406.0_16175425.0	CCCGCAGTGAGATAAAGGG
sg036294	GALNT15	chr3_16208508.0_16208527.0	TATCACCGGAGATACCACT
sg036295	GALNT15	chr3_16222695.0_16222714.0	ATTCTTCAGAACTGCACGG
sg036296	GALNT15	chr3_16200797.0_16200816.0	CAGCTATTCTGCTGAGGAG
sg036551	GATA3	chr10_8058736.0_8058755.0	GAGCTGTACTCGGGCACGT
sg036552	GATA3	chr10_8055875.0_8055894.0	GGTACCCTCCGACCCACCA
sg036553	GATA3	chr10_8058415.0_8058434.0	CCAAGACGTCCATCCACCA
sg036554	GATA3	chr10_8063997.0_8064016.0	AGGGAGTGTGTGAACTGTG
sg036555	GATA3	chr10_8069500.0_8069519.0	GTGGTCTGACAGTTCGCAC
sg036556	GATA3	chr10_8055753.0_8055772.0	CGCCGCGTCCATGTAGGAG
sg036844	GCOM1	chr15_57618074.0_57618093.0	CACCATAAACAACACCCTG
sg036845	GCOM1	chr15_57639472.0_57639491.0	GTGTCTGATCCGCTCACGG
sg036846	GCOM1	chr15_57629692.0_57629711.0	TCCTCACAGAAAACCCTCG
sg036847	GCOM1	chr15_57633687.0_57633706.0	GAGAAAGACCAGAGGATCG
sg036848	GCOM1	chr15_57639524.0_57639543.0	GTCAAGCAGATGGTCGAGG
sg036849	GCOM1	chr15_57639475.0_57639494.0	TAGGTGTCTGATCCGCTCA
sg036904	GDF10	chr10_47300884.0_47300903.0	CTCATAGAGCCTGTGCATG
sg036905	GDF10	chr10_47309998.0_47310017.0	CGCAGCCTCTCGCAGAACA
sg036906	GDF10	chr10_47310192.0_47310211.0	TAGGATGTAGGGCGCATAG
sg036907	GDF10	chr10_47310314.0_47310333.0	GGGTCCGCTGAGTTGTTGG
sg036908	GDF10	chr10_47312707.0_47312726.0	ATCCAGGAAGAGGACCCCA
sg036909	GDF10	chr10_47310712.0_47310731.0	GAAACCCTACCTTAGGCAT
sg037070	GFAP	chr17_44914066.0_44914085.0	CCAGGATGAAACCAACCTG
sg037071	GFAP	chr17_44913313.0_44913332.0	CATTGCCTCATACTGCGTG
sg037072	GFAP	chr17_44911763.0_44911782.0	GACGCTGCTGCCCGCAACG
sg037073	GFAP	chr17_44915322.0_44915341.0	GCCAGGGAGAAATCCACCC
sg037074	GFAP	chr17_44911338.0_44911357.0	CAGAGCCTCAAGGACGAGA
sg037075	GFAP	chr17_44911386.0_44911405.0	GAGGCGGCCAGTTATCAGG
sg037448	GIPC2	chr1_78080708.0_78080727.0	ACATGGAAAGACTCTTAGG
sg037449	GIPC2	chr1_78046313.0_78046332.0	TTTGAAATCTCGCCGTCGG
sg037450	GIPC2	chr1_78094981.0_78095000.0	GTTAAAACAATCTGTGTTG
sg037451	GIPC2	chr1_78046244.0_78046263.0	GGTAGTGCCACGGGCCGAG
sg037452	GIPC2	chr1_78119485.0_78119504.0	CATACCATTTCTTCCACGG
sg037453	GIPC2	chr1_78135594.0_78135613.0	CCAGCTTCAAACATTGTGG
sg037826	GLRA4	chrX_103724227.0_103724246.0	TCATCAGGATATTCTCGGT
sg037827	GLRA4	chrX_103724141.0_103724160.0	AAAGGGGCCAACTTCCATG
sg037828	GLRA4	chrX_103724542.0_103724561.0	TCCATCACCAAGACCACAA
sg037829	GLRA4	chrX_103724988.0_103725007.0	AGTCAAATCTGGAACCAAG
sg037830	GLRA4	chrX_103722190.0_103722209.0	CATCCCGCAAGATAAACTG
sg037831	GLRA4	chrX_103724947.0_103724966.0	AGTTTGTCTAGGAAATCAG
sg037939	GLYAT	chr11_58712787.0_58712806.0	GATGAGTTCTGGTGATCCA
sg037940	GLYAT	chr11_58710120.0_58710139.0	TGAGCATGGGTAACATCCA
sg037941	GLYAT	chr11_58715394.0_58715413.0	CTGTCTTTCACATAAACCA
sg037942	GLYAT	chr11_58715306.0_58715325.0	GAAACTTACCTGCTCCTGA
sg037943	GLYAT	chr11_58710731.0_58710750.0	GTATAGCCTCATTCAGGCT
sg037944	GLYAT	chr11_58709918.0_58709937.0	GACATACGTCACAAGGCCA
sg038047	GMPPB	chr3_49722638.0_49722657.0	TGTCCAATAAGATCAACGC
sg038048	GMPPB	chr3_49722720.0_49722739.0	GAACCCTCCAAGTACGGTG
sg038049	GMPPB	chr3_49723425.0_49723444.0	ACCTGCGACATGTAGCTCA
sg038050	GMPPB	chr3_49722433.0_49722452.0	TATATGCCATGGAGTTACA
sg038051	GMPPB	chr3_49723704.0_49723723.0	AAGGCACTGATCTTAGTGG
sg038052	GMPPB	chr3_49723611.0_49723630.0	ATCTTGCTGCACCAAGTGG
sg038185	GNB2L1	chr5_181242169.0_181242188.0	TTGCGTTGTGAGATCCCAG
sg038186	GNB2L1	chr5_181243681.0_181243700.0	TAGTCCGTACCTCGAGAGG
sg038187	GNB2L1	chr5_181239113.0_181239132.0	CACACAGGCTATCTGAACA
sg038188	GNB2L1	chr5_181241498.0_181241517.0	GTGTATTTGCACACACCCA
sg038689	GPAM	chr10_112163740.0_112163759.0	AACAGATGAATCCCTACGA
sg038690	GPAM	chr10_112166474.0_112166493.0	GCCTGTGGAGTGTAGCAAG
sg038691	GPAM	chr10_112173003.0_112173022.0	GGAACATTCAAATTCACAA
sg038692	GPAM	chr10_112177985.0_112178004.0	TATCAATGAAACTCACACA
sg038693	GPAM	chr10_112161663.0_112161682.0	TACCTGCCTGTGTCTGTAG
sg038694	GPAM	chr10_112168912.0_112168931.0	GGGCTTCTTCATACGACGA
sg038777	GPC3	chrX_133753917.0_133753936.0	ACATCAATGAGTGCCTCCG
sg038778	GPC3	chrX_133985330.0_133985349.0	GAGCGGACTTGGTGACAGG
sg038779	GPC3	chrX_133753567.0_133753586.0	ATGTACAGAATCTATGACA
sg038780	GPC3	chrX_133753675.0_133753694.0	TGTGGCGGTTACTGCAATG
sg038781	GPC3	chrX_133753959.0_133753978.0	ATACCCAGCTAATGAACCC
sg038782	GPC3	chrX_133753689.0_133753708.0	TGATGGTTAAACCCTGTGG
sg038807	GPD1	chr12_50106863.0_50106882.0	CGTATCACAGTGGTGCAAG
sg038808	GPD1	chr12_50104581.0_50104600.0	CCATCGCCAAGATCGTGGG
sg038809	GPD1	chr12_50106405.0_50106424.0	AGTTCTGTGAGACAACCAT
sg038810	GPD1	chr12_50106355.0_50106374.0	CCCCATCAGCACACTCATG
sg038811	GPD1	chr12_50109429.0_50109448.0	TGTACACAGCCATGAACAA
sg038812	GPD1	chr12_50107783.0_50107802.0	TTGCGCGTACAGGAAAGGT
sg038855	GPIHBP1	chr8_143213868.0_143213887.0	GGGCCAGATGACTACGACG
sg038856	GPIHBP1	chr8_143215268.0_143215287.0	CCTGACCACCCACTCCACG
sg038857	GPIHBP1	chr8_143215114.0_143215133.0	CACTTACCGGTGTTCCCGT
sg038858	GPIHBP1	chr8_143215305.0_143215324.0	CAGCCCATCACCAAGACGG
sg038859	GPIHBP1	chr8_143215285.0_143215304.0	CAGCTGTCTGTGCACCACG
sg038860	GPIHBP1	chr8_143215351.0_143215370.0	CACAGGCTGGACTGGCAGC
sg038867	GPLD1	chr6_24454077.0_24454096.0	CAGGTCATTGCCGTAGATG
sg038868	GPLD1	chr6_24486076.0_24486095.0	GGGCGTGTTAACTACAGAG
sg038869	GPLD1	chr6_24448188.0_24448207.0	GTGCCGTGTATGTCTACTT
sg038870	GPLD1	chr6_24467250.0_24467269.0	TGCCAGTCAAAGATCTACT
sg038871	GPLD1	chr6_24445535.0_24445554.0	TGTGACCTACCGTACGTAG
sg038872	GPLD1	chr6_24445607.0_24445626.0	TGGGTACTTCCCTTTCCAG
sg038939	GPR12	chr13_26759374.0_26759393.0	TCTGACGTACCATTCGGAG
sg038940	GPR12	chr13_26759618.0_26759637.0	AAGATGATAAGGACCACAA
sg038941	GPR12	chr13_26759229.0_26759248.0	CCGCGTTGTTCTTGGTGAG
sg038942	GPR12	chr13_26759670.0_26759689.0	TACACAAGACAATGTCCCA
sg038943	GPR12	chr13_26759122.0_26759141.0	GTGCTGCAGGGCTATCTGA
sg038944	GPR12	chr13_26759769.0_26759788.0	CGGCATCTAAATAATCCCG
sg039089	GPR17	chr2_127650934.0_127650953.0	AGATGCATCAGGAACACGT
sg039090	GPR17	chr2_127651265.0_127651284.0	CTGCAGGCAGACCACCGTG
sg039091	GPR17	chr2_127651117.0_127651136.0	ACAATGGCCAGGAAACGGT
sg039092	GPR17	chr2_127650759.0_127650778.0	AGTTGGTGATCAGACCTGG
sg039093	GPR17	chr2_127650886.0_127650905.0	ATGAAAAGCCACAGAGCCA
sg039094	GPR17	chr2_127651022.0_127651041.0	GATTTCCCCAAATGGCCAG
sg039485	GPX3	chr5_151027009.0_151027028.0	TGAGTACTCACTTGAGGGT
sg039486	GPX3	chr5_151025331.0_151025350.0	TGTTCCAGATGGACTGCCA
sg039487	GPX3	chr5_151025438.0_151025457.0	TACGTCCTCTTTGTCAACG
sg039488	GPX3	chr5_151026931.0_151026950.0	CCAGAATGACCAGACCGAA
sg039489	GPX3	chr5_151025384.0_151025403.0	GCCCTCACCATTGATGGGG
sg039490	GPX3	chr5_151027430.0_151027449.0	GGTATGTCCGACCAGGTGG
sg039649	GRIA1	chr5_153650495.0_153650514.0	CTGGCCCAAGATAGCATTG
sg039650	GRIA1	chr5_153677064.0_153677083.0	AATTGATATATCTCGCCGG
sg039651	GRIA1	chr5_153647146.0_153647165.0	ACATTTATGATGCCGACCG
sg039652	GRIA1	chr5_153770381.0_153770400.0	ATGGCATTGCAACACCCAA
sg039653	GRIA1	chr5_153677037.0_153677056.0	GGCTTTCCAGAGCCTGCGG
sg039654	GRIA1	chr5_153794641.0_153794660.0	GTTAAAACTGAACGAGCAG
sg039667	GRIA4	chr11_105924428.0_105924447.0	ATCACTTTGGTACGAGAGG
sg039668	GRIA4	chr11_105924585.0_105924604.0	ACCACGCTGACACCAATGT
sg039669	GRIA4	chr11_105753164.0_105753183.0	TTTGCTGGATCACTACGAA
sg039670	GRIA4	chr11_105905237.0_105905256.0	ATTGACTCTACGTCCATAG
sg039671	GRIA4	chr11_105753141.0_105753160.0	AGAGTGCTCCTCGTAACGA
sg039672	GRIA4	chr11_105612340.0_105612359.0	AACACCAGCCCCAATGCGT
sg039697	GRIK1	chr21_29587533.0_29587552.0	ATGACTTTCTCCCGCACGT
sg039698	GRIK1	chr21_29693885.0_29693904.0	AAATAGTTACCTCTCCGCG
sg039699	GRIK1	chr21_29689839.0_29689858.0	ATCTTTGTTGTCCACCGAG
sg039700	GRIK1	chr21_29651237.0_29651256.0	CAGTGGCGTAAACATGACC
sg039701	GRIK1	chr21_29576998.0_29577017.0	ACCAAGATAGAATATGGGG
sg039702	GRIK1	chr21_29555219.0_29555238.0	TATGATGAAAGAGAAGTGG
sg039733	GRIN2A	chr16_9938262.0_9938281.0	CTCTACTGTTCCAAAGACG
sg039734	GRIN2A	chr16_9938480.0_9938499.0	ATGATCTTCAGCATGACCG
sg039735	GRIN2A	chr16_9849775.0_9849794.0	GAGGAACACCGTGCCATGT
sg039736	GRIN2A	chr16_9829628.0_9829647.0	TTGTAAAAGAAGGCCCATG
sg039737	GRIN2A	chr16_9798338.0_9798357.0	AGGGCAATTCCATAACCGG
sg039738	GRIN2A	chr16_9768993.0_9769012.0	CTGGACATTGACAACATGG
sg039829	GRM3	chr7_86838952.0_86838971.0	CAGTGACCAACTTTCAAGT
sg039830	GRM3	chr7_86765359.0_86765378.0	TCATCAATAGCAAACAACA
sg039831	GRM3	chr7_86765561.0_86765580.0	GACCCCTGCAATGAGAAGT
sg039832	GRM3	chr7_86839122.0_86839141.0	CATCAGCCAGGTATTCGTA
sg039833	GRM3	chr7_86786426.0_86786445.0	GAGGCTACTGTGGACACGT
sg039834	GRM3	chr7_86839871.0_86839890.0	TGTCACATAAAATATAGGG
sg040041	GSTA1	chr6_52794195.0_52794214.0	CTGCCCGTATGTCCACCTG
sg040042	GSTA1	chr6_52792969.0_52792988.0	TCCATGGCTCTTTAAGACC
sg040043	GSTA1	chr6_52799229.0_52799248.0	TCCACTACTTCAATGCACG
sg040044	GSTA1	chr6_52799182.0_52799201.0	CTGGCTGCAGCTGGAGTAG
sg040045	GSTA1	chr6_52792899.0_52792918.0	GAACTTCTCTACTACGTCG
sg040046	GSTA1	chr6_52796284.0_52796303.0	ATGTTCCAGCAAGTGCCAA
sg040107	GSTM5	chr1_109713536.0_109713555.0	CTTGCGGGCAATGTAGCGC
sg040108	GSTM5	chr1_109712630.0_109712649.0	TATTCCAGGAGCAAGCGGA
sg040109	GSTM5	chr1_109713724.0_109713743.0	CAGTCTGACCAGCTCCATG
sg040110	GSTM5	chr1_109712668.0_109712687.0	GAAAAGAAGTACACGCTGG
sg040111	GSTM5	chr1_109713754.0_109713773.0	TGTGGGACTCACAAAATCT
sg040112	GSTM5	chr1_109715189.0_109715208.0	GGAAGGCGTCCAAGCACTT
sg040485	GYG2	chrX_2853988.0_2854007.0	TTCATCGAACACCTTCGAG
sg040486	GYG2	chrX_2859912.0_2859931.0	CCAACACCGAGCCACTCTG
sg040487	GYG2	chrX_2860014.0_2860033.0	CTTTATAAAAGCGTCCAAG
sg040488	GYG2	chrX_2855005.0_2855024.0	TCGATGAGCTGTTTGACAG
sg040489	GYG2	chrX_2843242.0_2843261.0	TGGCAGTAGATGTCATTGG
sg040490	GYG2	chrX_2881096.0_2881115.0	GTGAAGGAATTGAGCCCCG
sg040525	GYS2	chr12_21574191.0_21574210.0	CCACGCTACACTACTTGGG
sg040526	GYS2	chr12_21580493.0_21580512.0	TATACTGTGATTCAGACAA
sg040527	GYS2	chr12_21560425.0_21560444.0	AAGACAAATAATTTCAACG
sg040528	GYS2	chr12_21580351.0_21580370.0	TGGACGCAATGAATAAGCA
sg040529	GYS2	chr12_21540463.0_21540482.0	CCGCCAAAGGATTATCCAG
sg040530	GYS2	chr12_21558201.0_21558220.0	AACCGCACAGATAGAGTCA
sg040855	HAS3	chr16_69109662.0_69109681.0	TGCATTGCCGCATACCAGG
sg040856	HAS3	chr16_69109845.0_69109864.0	TGGCGCAGCAACTTCCATG
sg040857	HAS3	chr16_69110006.0_69110025.0	GTAGTCCACCGAATCGCCG
sg040858	HAS3	chr16_69114634.0_69114653.0	CACCGGAGGTACTTAGTGG
sg040859	HAS3	chr16_69110005.0_69110024.0	TAGTCCACCGAATCGCCGA
sg040860	HAS3	chr16_69109467.0_69109486.0	ATCCTGGCAGCCTATGTGA
sg040933	HBA1	chr16_177025.0_177044.0	GACGCGCTGACCAACGCCG
sg040934	HBA1	chr16_176750.0_176769.0	AGGCCGCCTGGGGTAAGGT
sg040935	HBA1	chr16_176776.0_176795.0	CACGCTGGCGAGTATGGTG
sg040936	HBA1	chr16_176966.0_176985.0	CGCACTTCGACCTGAGCCA
sg040937	HBA1	chr16_177355.0_177374.0	GCCAGGAACTTGTCCAGGG
sg040938	HBA1	chr16_176804.0_176823.0	AGGGAGCCTCACCTCTCCA
sg040939	HBA2	chr16_172975.0_172994.0	GCTGGCGAGTATGGTGCGG
sg040940	HBA2	chr16_173194.0_173213.0	GTTAAGGGCCACGGCAAGA
sg040941	HBA2	chr16_173290.0_173309.0	CACGCGCACAAGCTTCGGG
sg040942	HBA2	chr16_172937.0_172956.0	CCAACGTCAAGGCCGCCTG
sg040943	HBA2	chr16_173240.0_173259.0	ATGTCGTCCACGTGCGCCA
sg040944	HBA2	chr16_173279.0_173298.0	TGCGCGTGCAGGTCGCTCA
sg040945	HBB	chr11_5226736.0_5226755.0	GGAGTGGACAGATCCCCAA
sg040946	HBB	chr11_5226950.0_5226969.0	AGGTGAACGTGGATGAAGT
sg040947	HBB	chr11_5226685.0_5226704.0	CTCATGGCAAGAAAGTGCT
sg040948	HBB	chr11_5226974.0_5226993.0	CTGCCGTTACTGCCCTGTG
sg040949	HBB	chr11_5226670.0_5226689.0	TGCTCGGTGCCTTTAGTGA
sg040950	HBB	chr11_5226569.0_5226588.0	GACTCACCCTGAAGTTCTC
sg041017	HCAR2	chr12_122702815.0_122702834.0	AATAGTGATGCCCCACAGA
sg041018	HCAR2	chr12_122703019.0_122703038.0	CCTGATGGACAACTATGTG
sg041019	HCAR2	chr12_122702768.0_122702787.0	AGATGCCGATCCAGAATGG
sg041020	HCAR2	chr12_122702948.0_122702967.0	TGTTGGCTATGAACCGCCA
sg041021	HCAR2	chr12_122702664.0_122702683.0	AGAACAGGATGATGCCCAG
sg041022	HCAR2	chr12_122703189.0_122703208.0	ATTGTCAAGGTGTTGCCGC
sg041397	HEPACAM	chr11_124923399.0_124923418.0	ACATCATCTTGTCTACAGG
sg041398	HEPACAM	chr11_124924881.0_124924900.0	AGAGGTCATCGGCACCCTG
sg041399	HEPACAM	chr11_124923802.0_124923821.0	TCATCCTCCATGAGCACGC
sg041400	HEPACAM	chr11_124925013.0_124925032.0	CCTGATCCATGGCACCGTG
sg041401	HEPACAM	chr11_124923974.0_124923993.0	TTGAAGCCACCAACACCTG
sg041402	HEPACAM	chr11_124924900.0_124924919.0	GTGCCAATGGACTGCACCA
sg041421	HEPN1	chr11_124919808.0_124919827.0	TTAGGAGACTAGGGATGCA
sg041422	HEPN1	chr11_124919912.0_124919931.0	GGCAGTAATCTACTGTGTG
sg041423	HEPN1	chr11_124919780.0_124919799.0	CTGATTCGCCATCAACCCA
sg041424	HEPN1	chr11_124919852.0_124919871.0	AGGGAATGGAATACACAGA
sg041425	HEPN1	chr11_124919938.0_124919957.0	TGAACTGTTCAATAGGCGG
sg041426	HEPN1	chr11_124919851.0_124919870.0	GAGGGAATGGAATACACAG
sg041427	HERC1	chr15_63696291.0_63696310.0	CATCCCAGACAATAGAACG
sg041428	HERC1	chr15_63727719.0_63727738.0	AGGTGGCAACAAGTCGAGG
sg041429	HERC1	chr15_63674479.0_63674498.0	CAGTTCTTGATGCGACACA
sg041430	HERC1	chr15_63749503.0_63749522.0	CTGGGGCAATAACTCAATG
sg041431	HERC1	chr15_63775155.0_63775174.0	TGCATCAGTGCTTGACCGG
sg041432	HERC1	chr15_63622823.0_63622842.0	TTGTAACCCACTTCTGCGG
sg041637	HHATL	chr3_42697019.0_42697038.0	GTGCGGTGATGCACTTGGG
sg041638	HHATL	chr3_42699086.0_42699105.0	AAGATGATGACGTTGCGAA
sg041639	HHATL	chr3_42699785.0_42699804.0	GGTCGCACAGACTCCCGGA
sg041640	HHATL	chr3_42698301.0_42698320.0	AAGAGGTGCTGTTTCATGG
sg041641	HHATL	chr3_42698169.0_42698188.0	ATGGGCCCGAAGAAGAAGA
sg041642	HHATL	chr3_42700801.0_42700820.0	ATCAAGACAGCATTGCCGG
sg041734	HIF3A	chr19_46312213.0_46312232.0	AGCGCGTGGATGTACTCGT
sg041735	HIF3A	chr19_46305331.0_46305350.0	TAAGCCATGTCTCCCTCGG
sg041736	HIF3A	chr19_46309156.0_46309175.0	AACTGCTCTGGACATATGA
sg041737	HIF3A	chr19_46312616.0_46312635.0	CAGACGATACTCTCCGACT
sg041738	HIF3A	chr19_46305358.0_46305377.0	AGAATGTCAGCAAACACCT
sg041739	HIF3A	chr19_46305315.0_46305334.0	GTCATGGTGCTCACCGCCG
sg042436	HLF	chr17_55265535.0_55265554.0	ACCTGAGCACGCCGTAGGG
sg042437	HLF	chr17_55267788.0_55267807.0	GATGAGAGTAACAGCCCGA
sg042438	HLF	chr17_55267860.0_55267879.0	GGAAAGTATCTCCGTCATA
sg042439	HLF	chr17_55315290.0_55315309.0	GTCTGGCTCATAACCCACT
sg042440	HLF	chr17_55267881.0_55267900.0	TTGGAATACATGGACCTGG
sg042441	HLF	chr17_55267996.0_55268015.0	CTGAGGTCCATGACCGAGG
sg042478	HMCN1	chr1_185962638.0_185962657.0	GTTTATCGTGGGTTCACAC
sg042479	HMCN1	chr1_186007150.0_186007169.0	ATGTTGAACTTCTAGACAG
sg042480	HMCN1	chr1_186039767.0_186039786.0	GGTGGTTAATAACCCGGTG
sg042481	HMCN1	chr1_186093482.0_186093501.0	TAGTTACACCTACAATTAG
sg042482	HMCN1	chr1_186062518.0_186062537.0	TTTCACCCACAATATGAGG
sg042483	HMCN1	chr1_186070731.0_186070750.0	TCCTTGTACCAGCTGAGGG
sg042562	HMGCS2	chr1_119759206.0_119759225.0	TCCACTATTGGGTACTCCG
sg042563	HMGCS2	chr1_119759943.0_119759962.0	ACATTGCCGTCTATCCCAG
sg042564	HMGCS2	chr1_119764369.0_119764388.0	GAGCGCATACAGCTCCCAT
sg042565	HMGCS2	chr1_119764569.0_119764588.0	ATACTTGGCCAAAGGACGT
sg042566	HMGCS2	chr1_119757282.0_119757301.0	AGCTTATATAAGGGGCTGG
sg042567	HMGCS2	chr1_119764227.0_119764246.0	CCACCAATGCCTGCTACGG
sg042802	HNRNPK	chr9_83971974.0_83971993.0	ATGATATGAGCCCTCGTCG
sg042803	HNRNPK	chr9_83973287.0_83973306.0	AAAATCAAAGAACTTCGAG
sg042804	HNRNPK	chr9_83972094.0_83972113.0	TGATGTTTGATGACCGTCG
sg042805	HNRNPK	chr9_83975448.0_83975467.0	TGTTGGGACATACCGCTCG
sg042806	HNRNPK	chr9_83972911.0_83972930.0	CAACTCTGTCAGTGGAATG
sg042807	HNRNPK	chr9_83974514.0_83974533.0	TCCCTACCTTGGAAGAGGT
sg042940	HOXA2	chr7_27101204.0_27101223.0	GGGAAATGTAAAAGCCTTG
sg042941	HOXA2	chr7_27101446.0_27101465.0	AATCCCTGGAAATCGCCGA
sg042942	HOXA2	chr7_27101324.0_27101343.0	CTGCAATCTCCACCCTTCG
sg042943	HOXA2	chr7_27102401.0_27102420.0	TTGAAATGTATCAGCGACA
sg042944	HOXA2	chr7_27101384.0_27101403.0	AACACACAGCTTCTAGAGC
sg042945	HOXA2	chr7_27101243.0_27101262.0	AAGAGGCAGACCCAGTGCA
sg042958	HOXA5	chr7_27143230.0_27143249.0	ACTCCCTAAGCAACTCCAG
sg042959	HOXA5	chr7_27143440.0_27143459.0	ATGGCATGGATCTCAGCGT
sg042960	HOXA5	chr7_27143482.0_27143501.0	ACTCGGCGAGCATGCACTC
sg042961	HOXA5	chr7_27143558.0_27143577.0	GGTCGCTATCCAAATGGCC
sg042962	HOXA5	chr7_27141975.0_27141994.0	TTACCTGACCCGCAGAAGG
sg042963	HOXA5	chr7_27141900.0_27141919.0	CCAAAACCGGAGAATGAAG
sg042964	HOXA6	chr7_27147294.0_27147313.0	GGATATGTCTTACCCGCGC
sg042965	HOXA6	chr7_27147501.0_27147520.0	TTATCAGAATAGAAACACG
sg042966	HOXA6	chr7_27147644.0_27147663.0	GGCTGGCTATGACGCGCTG
sg042967	HOXA6	chr7_27147346.0_27147365.0	GACCGGAAGTACACGAGCC
sg042968	HOXA6	chr7_27145857.0_27145876.0	TACACGCGCTACCAGACAC
sg042969	HOXA6	chr7_27147702.0_27147721.0	TCCCCGGGAGCCTTCCCAG
sg043180	HPD	chr12_121857409.0_121857428.0	TTGCTGCAGTAGAATGACG
sg043181	HPD	chr12_121849000.0_121849019.0	GATGGTGTCCGCCTCCGAA
sg043182	HPD	chr12_121849746.0_121849765.0	TGGAGAAGATGAACTACAT
sg043183	HPD	chr12_121857333.0_121857352.0	CAGCCATGTAATCAAACAA
sg043184	HPD	chr12_121854728.0_121854747.0	GAGCAAGACAAGTTTGGGA
sg043185	HPD	chr12_121856349.0_121856368.0	AAGGACATTGCGTTCGAGG
sg043258	HPSE2	chr10_98721646.0_98721665.0	TCTGACCTACCCATCTAGG
sg043259	HPSE2	chr10_99235533.0_99235552.0	ATCCGTCCATCATTCATGA
sg043260	HPSE2	chr10_99232389.0_99232408.0	AACCCGGCGAAAAGCCGCG
sg043261	HPSE2	chr10_98721647.0_98721666.0	CTGACCTACCCATCTAGGA
sg043262	HPSE2	chr10_98743988.0_98744007.0	ATTTAGAGCAAATATCAGG
sg043263	HPSE2	chr10_99232445.0_99232464.0	CCCCCGAAGCGCAGAAAGG
sg043294	HRASLS5	chr11_63466321.0_63466340.0	ATCTTTAGCAATCGGGCCG
sg043295	HRASLS5	chr11_63490901.0_63490920.0	CTGAACGTCTGAGCGCAGG
sg043296	HRASLS5	chr11_63490326.0_63490345.0	GATTCTTCTAATTCAAGGG
sg043297	HRASLS5	chr11_63490263.0_63490282.0	CGCCGGGCACATTAGAACA
sg043298	HRASLS5	chr11_63468351.0_63468370.0	CTTACTTGGGGGAGCCAGA
sg043299	HRASLS5	chr11_63463575.0_63463594.0	TAGAGCACGCCCTGATGGA
sg043394	HS3ST4	chr16_25692913.0_25692932.0	CCACCGACGAGGATCTCGC
sg043395	HS3ST4	chr16_26135630.0_26135649.0	TTGGATGGGCAAATAACCA
sg043396	HS3ST4	chr16_26135711.0_26135730.0	AAGGACATCAAACTGATTG
sg043397	HS3ST4	chr16_25692720.0_25692739.0	GGCTCGCGTTGTCCAGCGG
sg043398	HS3ST4	chr16_25693022.0_25693041.0	CATCGGGGTCAAGAAAGGA
sg043399	HS3ST4	chr16_26135663.0_26135682.0	AGTTACTTTGTGACAAATG
sg043490	HSD17B13	chr4_87322694.0_87322713.0	AGCTGGGCATGGAATAGGC
sg043491	HSD17B13	chr4_87315503.0_87315522.0	GAGGTAAGGAATCCCTTCG
sg043492	HSD17B13	chr4_87317192.0_87317211.0	GTGGGTGATGTAACAATCG
sg043493	HSD17B13	chr4_87318429.0_87318448.0	TCCTAATTACAGCGCGGTG
sg043494	HSD17B13	chr4_87318426.0_87318445.0	TAATTACAGCGCGGTGTGG
sg043495	HSD17B13	chr4_87310311.0_87310330.0	TCGTAAGAAGTCTGATAGA
sg043706	HSPA5	chr9_125239229.0_125239248.0	GTGAGAAGAGACACATCGA
sg043707	HSPA5	chr9_125238666.0_125238685.0	ATGGCAAGGAACCATCCCG
sg043708	HSPA5	chr9_125240831.0_125240850.0	GACATAGGACGGCGTGATG
sg043709	HSPA5	chr9_125238797.0_125238816.0	GACGGGCTTCATAGTAGAC
sg043710	HSPA5	chr9_125239065.0_125239084.0	GTGCAGAAACTCCGGCGCG
sg043711	HSPA5	chr9_125239116.0_125239135.0	AAACTGTACAAAAAGAAGA
sg043754	HSPB6	chr19_35756906.0_35756925.0	GCCGAAGCGCTGGTCAAAG
sg043755	HSPB6	chr19_35755869.0_35755888.0	AAAAGTGGCCGGGGTCCGT
sg043756	HSPB6	chr19_35756835.0_35756854.0	GGTGCGCGCAGGTAGTAGG
sg043757	HSPB6	chr19_35756937.0_35756956.0	GCCGAAAGTCCGGGCAACG
sg043758	HSPB6	chr19_35755836.0_35755855.0	GTGAAGCACTTCTCGCCGG
sg043759	HSPB6	chr19_35755815.0_35755834.0	GAAATTGCTGTCAAGGTGG
sg043760	HSPB7	chr1_16017796.0_16017815.0	ATGAAGCTGCCAAAGTCAT
sg043761	HSPB7	chr1_16017915.0_16017934.0	ATGGAAACTTCTCTCCGCT
sg043762	HSPB7	chr1_16017090.0_16017109.0	ACCTCCAACAACCACATCG
sg043763	HSPB7	chr1_16017173.0_16017192.0	CAGGCAACATCAAGACCCT
sg043764	HSPB7	chr1_16015596.0_16015615.0	GTCCAGCAGACCTTCCGGA
sg043765	HSPB7	chr1_16017795.0_16017814.0	TGACTTTGGCAGCTTCATG
sg043991	HUWE1	chrX_53592524.0_53592543.0	TTCTATGCCACATCCTCCG
sg043992	HUWE1	chrX_53561809.0_53561828.0	AGCGCTCAAATCGGACCAA
sg043993	HUWE1	chrX_53583566.0_53583585.0	GGTATGACGAAGGGTACAG
sg043994	HUWE1	chrX_53645312.0_53645331.0	CGGCTACAACATTTGGCAG
sg043995	HUWE1	chrX_53534088.0_53534107.0	GGGCAGCAAAGCCTTGCAG
sg043996	HUWE1	chrX_53548246.0_53548265.0	CAGCCACTTCACACAGCAG
sg044211	ID4	chr6_19838039.0_19838058.0	CACGTTATCGACTACATCC
sg044212	ID4	chr6_19837960.0_19837979.0	CGACTGCTATAGCCGCCTG
sg044213	ID4	chr6_19837789.0_19837808.0	GCAGCCCGACGGCGCCTTG
sg044214	ID4	chr6_19837926.0_19837945.0	AGGCACAGCGCCGGCTCGT
sg044215	ID4	chr6_19838006.0_19838025.0	AACAAGAAAGTCAGCAAAG
sg044216	ID4	chr6_19837963.0_19837982.0	CTGCTATAGCCGCCTGCGG
sg044727	IGF1	chr12_102475758.0_102475777.0	AGGTAGAAGAGATGCGAGG
sg044728	IGF1	chr12_102480338.0_102480357.0	AGCACTTAAATAATTGGGT
sg044729	IGF1	chr12_102419636.0_102419655.0	GCGCCTCAGACAGGCATCG
sg044730	IGF1	chr12_102475665.0_102475684.0	ATGCTCTTCAGTTCGTGTG
sg044731	IGF1	chr12_102419601.0_102419620.0	CCGGAGCTGTGATCTAAGG
sg044732	IGF1	chr12_102419658.0_102419677.0	GTATGGCTCCAGCAGTCGG
sg044805	IGFBP6	chr12_53097969.0_53097988.0	CATCCGCCCAAGGACGACG
sg044806	IGFBP6	chr12_53100729.0_53100748.0	AGGAGAGTAAACCCCAAGC
sg044807	IGFBP6	chr12_53100819.0_53100838.0	CCCGCAGAATTGGGCTGGG
sg044808	IGFBP6	chr12_53097894.0_53097913.0	GCTGAGGGCTGTCTCAGGA
sg044809	IGFBP6	chr12_53101070.0_53101089.0	CTGCAGCAACTCCAGACTG
sg044810	IGFBP6	chr12_53097955.0_53097974.0	GGATGGCACTGCAGTCCTG
sg044894	IGSF10	chr3_151446472.0_151446491.0	CATTGGTGCTAGACACACG
sg044895	IGSF10	chr3_151445512.0_151445531.0	AGAGCAGTTACTGACAACG
sg044896	IGSF10	chr3_151447794.0_151447813.0	AATTAACACTCCAGCGACG
sg044897	IGSF10	chr3_151448278.0_151448297.0	CTCACCTATAGGATAACTG
sg044898	IGSF10	chr3_151443793.0_151443812.0	GGGTGGAAATTCAGGACCG
sg044899	IGSF10	chr3_151443310.0_151443329.0	GAGAGGACCCAGTAAACGC
sg045126	IL17B	chr5_149376761.0_149376780.0	GCTGTGGATGTCCAACAAG
sg045127	IL17B	chr5_149376793.0_149376812.0	CTGGCCCAGAGAAAGTGTG
sg045128	IL17B	chr5_149376847.0_149376866.0	GAGTATGAGAGGAACATCG
sg045129	IL17B	chr5_149376889.0_149376908.0	TCCGTGACACCAGGTCCAG
sg045130	IL17B	chr5_149376962.0_149376981.0	CAGGAGCCCCAAAAGCAAG
sg045131	IL17B	chr5_149376868.0_149376887.0	AAACCGTATGCCCGCATGG
sg045420	IL33	chr9_6250529.0_6250548.0	GGCCTTATGATAAAAAAGG
sg045421	IL33	chr9_6253581.0_6253600.0	AACACCCCTCAAATGAATC
sg045422	IL33	chr9_6251208.0_6251227.0	TGGACCCCTGATATACCAA
sg045423	IL33	chr9_6241761.0_6241780.0	AAGCCTTGTGTTTCAAGCT
sg045424	IL33	chr9_6254532.0_6254551.0	AACAAGGAACACTCTGTGG
sg045425	IL33	chr9_6256063.0_6256082.0	GGAGTGTTTATAGGTGTAA
sg045764	INMT	chr7_30753742.0_30753761.0	GGGACACGCTGATTGACAT
sg045765	INMT	chr7_30753829.0_30753848.0	CGGTTGCGGTCGGTAAAGT
sg045766	INMT	chr7_30752201.0_30752220.0	AAGTAGCCAAGTAGTCCCT
sg045767	INMT	chr7_30753901.0_30753920.0	CAGGCGAATTTCACCGCTG
sg045768	INMT	chr7_30755634.0_30755653.0	CGTGACAGTGGTCACCAGG
sg045769	INMT	chr7_30753906.0_30753925.0	GTGAAATTCGCCTGTGAGC
sg046380	IRS4	chrX_108734197.0_108734216.0	TCACTGGAGCTTACAAGAG
sg046381	IRS4	chrX_108735560.0_108735579.0	CTGTGTCTAACCGACGAGG
sg046382	IRS4	chrX_108736136.0_108736155.0	TCAGACTCCGAGTCCGAAG
sg046383	IRS4	chrX_108735893.0_108735912.0	ATAGGGTGATCACGCGCCG
sg046384	IRS4	chrX_108735618.0_108735637.0	GGTAATAGTCAAACCCAGG
sg046385	IRS4	chrX_108736286.0_108736305.0	AGACTAAGAGGTGCAGCAG
sg046386	IRX1	chr5_3599224.0_3599243.0	GGCTCGCAGTATGAACTGA
sg046387	IRX1	chr5_3599878.0_3599897.0	AGATCTTGGGCTTGCCGTG
sg046388	IRX1	chr5_3599305.0_3599324.0	TACGGCCAGTTCCAATACG
sg046389	IRX1	chr5_3599507.0_3599526.0	AGGAGAACAAGGTGACATG
sg046390	IRX1	chr5_3596280.0_3596299.0	GCGTACATGCCCAGCACCG
sg046391	IRX1	chr5_3596368.0_3596387.0	ACTCACCATCTGCGAGAAG
sg046416	IRX6	chr16_55327803.0_55327822.0	CATGGGCGCCCAAGAACAA
sg046417	IRX6	chr16_55327872.0_55327891.0	GCCTAACTGCTGACACCAA
sg046418	IRX6	chr16_55327384.0_55327403.0	GGGGCAGTACCAATATGAA
sg046419	IRX6	chr16_55326489.0_55326508.0	GCTCCATAGATGCCCAAGG
sg046420	IRX6	chr16_55327298.0_55327317.0	CCACAGTATGAATTTAAGG
sg046421	IRX6	chr16_55327806.0_55327825.0	GGGCGCCCAAGAACAAAGG
sg046614	ITGA7	chr12_55695543.0_55695562.0	TGTACCCGGGTCAGCGACA
sg046615	ITGA7	chr12_55696993.0_55697012.0	GGCTCAGGAACGTCACACG
sg046616	ITGA7	chr12_55698531.0_55698550.0	TGGCGCTCAAAGAAGTAGG
sg046617	ITGA7	chr12_55703055.0_55703074.0	ACAGAGTGGACATCGACCA
sg046618	ITGA7	chr12_55688190.0_55688209.0	CTGCAGCTCACCACTGTGG
sg046619	ITGA7	chr12_55694270.0_55694289.0	GGCAGCTCAATGAAGACAC
sg046746	ITIH2	chr10_7730075.0_7730094.0	AAACCATGGAATTGCACAA
sg046747	ITIH2	chr10_7727727.0_7727746.0	CAAAATGAAGATTGCCCGT
sg046748	ITIH2	chr10_7705172.0_7705191.0	TTACTATACCTGATATCTC
sg046749	ITIH2	chr10_7720862.0_7720881.0	TGTGGGTTATCGAACCACA
sg046750	ITIH2	chr10_7717692.0_7717711.0	TTCGAACTTCACTACCAGG
sg046751	ITIH2	chr10_7730062.0_7730081.0	GACTGTCCAATGAAAACCA
sg046764	ITIH5	chr10_7642010.0_7642029.0	CTGCAGGAAACCGTAGTGA
sg046765	ITIH5	chr10_7576683.0_7576702.0	TGGAGCTACCTCACCACAA
sg046766	ITIH5	chr10_7576885.0_7576904.0	CTCGGAGATCATCATTGCG
sg046767	ITIH5	chr10_7580049.0_7580068.0	GCAGGCACAGACATCAACG
sg046768	ITIH5	chr10_7576845.0_7576864.0	CTGGATCACCTGCACGTGG
sg046769	ITIH5	chr10_7563219.0_7563238.0	CAAAGGAAGATTTACAACG
sg046986	JAK1	chr1_64866935.0_64866954.0	GGTTTCATTCGAATGACGG
sg046987	JAK1	chr1_64846640.0_64846659.0	ACACTTACTCTCCACGTCG
sg046988	JAK1	chr1_64844757.0_64844776.0	CCTAGACAGCACCGTAATG
sg046989	JAK1	chr1_64860197.0_64860216.0	CGGAAGTAGCCATCTACCA
sg046990	JAK1	chr1_64860134.0_64860153.0	TTGTGGACGATCAACGGGG
sg046991	JAK1	chr1_64845586.0_64845605.0	GGTGCATGAAGAGATCCAG
sg047124	JPH2	chr20_44118609.0_44118628.0	CATAGGACAAGCCACGCCA
sg047125	JPH2	chr20_44186582.0_44186601.0	GGAGCCAGAGTATTCGCCC
sg047126	JPH2	chr20_44159742.0_44159761.0	CTTGACCAGCACGTTGTGG
sg047127	JPH2	chr20_44160323.0_44160342.0	CCACCACGGCCATCCCGTA
sg047128	JPH2	chr20_44160293.0_44160312.0	ACGACAGCGACGTGCGCAG
sg047129	JPH2	chr20_44186671.0_44186690.0	TTCGACTTTGATGATGGAG
sg047272	KAT6B	chr10_75021936.0_75021955.0	GTCAACTAGAGCTAACAGT
sg047273	KAT6B	chr10_75024980.0_75024999.0	AAGGGGTCGTAAACGCAGG
sg047274	KAT6B	chr10_74976038.0_74976057.0	TACGACGCATACGTTTGGG
sg047275	KAT6B	chr10_74975533.0_74975552.0	GGCTGTTACAGACCCCACT
sg047276	KAT6B	chr10_75028582.0_75028601.0	GCGCGGTCTATCTAAGTGG
sg047277	KAT6B	chr10_75021203.0_75021222.0	TGATCCAGACAGTCTGAGG
sg047458	KCNB1	chr20_49374968.0_49374987.0	CATGATGGAAATTATGGCA
sg047459	KCNB1	chr20_49373917.0_49373936.0	CAACCCATCCTCAATACCA
sg047460	KCNB1	chr20_49374676.0_49374695.0	TTCCAGAATGTCCGCCGCG
sg047461	KCNB1	chr20_49374837.0_49374856.0	GTGAACCATGCGATGCACA
sg047462	KCNB1	chr20_49374441.0_49374460.0	ATGGTGGCCCACCAGAAAG
sg047463	KCNB1	chr20_49374154.0_49374173.0	ATTGTGGTTGAGAAAAATG
sg047512	KCNE1	chr21_34449596.0_34449615.0	AGAAAGGGCGTCACCGCTG
sg047513	KCNE1	chr21_34449385.0_34449404.0	CTCGATGTAGACGTTGAAT
sg047514	KCNE1	chr21_34449482.0_34449501.0	AGTACCATGAGGACGTAGA
sg047515	KCNE1	chr21_34449510.0_34449529.0	GCTTGCCGTCACTGCTGCG
sg047516	KCNE1	chr21_34449348.0_34449367.0	AAGGACAAGGCCTATGTCC
sg047517	KCNE1	chr21_34449280.0_34449299.0	GGGTTGTTCTATGGCCAGA
sg047614	KCNH8	chr3_19253820.0_19253839.0	CAAATAGAAAAGTCACTGG
sg047615	KCNH8	chr3_19390617.0_19390636.0	TATGCTTTCAACGTCACAG
sg047616	KCNH8	chr3_19512999.0_19513018.0	AAGCGACTCCCATCCATTG
sg047617	KCNH8	chr3_19438203.0_19438222.0	CTATGGCAACAATACCTTG
sg047618	KCNH8	chr3_19450120.0_19450139.0	GTCACGTTTCCAAACACCA
sg047619	KCNH8	chr3_19438256.0_19438275.0	CTCAGCGTGAAGTACAGAG
sg047626	KCNIP2	chr10_101829109.0_101829128.0	CAAACCAAATTCACGCGCA
sg047627	KCNIP2	chr10_101829150.0_101829169.0	TCAGGCCGGTGACACACGG
sg047628	KCNIP2	chr10_101828685.0_101828704.0	CCTTCCAGGAATGTCCCAG
sg047629	KCNIP2	chr10_101828226.0_101828245.0	GTTTGTCCGTGATTCTTCG
sg047630	KCNIP2	chr10_101828422.0_101828441.0	AAGGCATTGAAGAGAAAAG
sg047631	KCNIP2	chr10_101827923.0_101827942.0	TACCCTGCACTCCGGGAGG
sg047686	KCNJ16	chr17_70132121.0_70132140.0	ATGCGGACGCAAAATACCC
sg047687	KCNJ16	chr17_70132417.0_70132436.0	AATGGACGTTGTCAACACA
sg047688	KCNJ16	chr17_70132542.0_70132561.0	GCAACTTAAGATGGACTGG
sg047689	KCNJ16	chr17_70132683.0_70132702.0	ATCACCAATGCGCCACATG
sg047690	KCNJ16	chr17_70132302.0_70132321.0	AGAAAATATCACAAACATA
sg047691	KCNJ16	chr17_70133227.0_70133246.0	AGCAGCTGTGAAAACCCTG
sg048202	KDM5C	chrX_53201882.0_53201901.0	CAAGGCTACAACTTTGCCG
sg048203	KDM5C	chrX_53218305.0_53218324.0	GATTCCCAATGTAGAACGG
sg048204	KDM5C	chrX_53216136.0_53216155.0	AAAAAGCTACAGATCTATG
sg048205	KDM5C	chrX_53197868.0_53197887.0	ATACTTCATAGCCCCCACA
sg048206	KDM5C	chrX_53220885.0_53220904.0	CCACTTCCACAGCAAAGGG
sg048207	KDM5C	chrX_53224741.0_53224760.0	TGCAAGATCCGCCCACCCG
sg048214	KDM6A	chrX_45063796.0_45063815.0	CAACTATCTAACTCCACTC
sg048215	KDM6A	chrX_45053949.0_45053968.0	TGGTAAGTCTCACCTTCCG
sg048216	KDM6A	chrX_45070066.0_45070085.0	CTTTGTATGAACAGCTGGG
sg048217	KDM6A	chrX_45110151.0_45110170.0	ATTGTGCACGAAAAACAAG
sg048218	KDM6A	chrX_44873608.0_44873627.0	GATGAGGAAAAGAAAATGG
sg048219	KDM6A	chrX_44873662.0_44873681.0	TCCCCCAGCCTGACAGCCG
sg048400	KIAA0408	chr6_127449819.0_127449838.0	CGGTCTAACCATAGAAGGT
sg048401	KIAA0408	chr6_127447238.0_127447257.0	AGATGTTGGACTTAGCATG
sg048402	KIAA0408	chr6_127447465.0_127447484.0	CTTGTTCAGAATCCGAGCT
sg048403	KIAA0408	chr6_127450214.0_127450233.0	TTCACTTTGTCCTAAATCG
sg048404	KIAA0408	chr6_127453848.0_127453867.0	ATGCAGAAGAAAATAGAAG
sg048405	KIAA0408	chr6_127446910.0_127446929.0	AGCTGCTCAAAATCATCGG
sg048494	KIAA1109	chr4_122246197.0_122246216.0	CAATAGGAACGACTAACCA
sg048495	KIAA1109	chr4_122263579.0_122263598.0	GACACAATAGTCTTCCCAC
sg048496	KIAA1109	chr4_122272305.0_122272324.0	GTGAACCGCACACACCTAG
sg048497	KIAA1109	chr4_122201031.0_122201050.0	CGGCATGTTCCATATTCGG
sg048498	KIAA1109	chr4_122244004.0_122244023.0	CTAAAGCTTCAGCCACCAG
sg048499	KIAA1109	chr4_122271039.0_122271058.0	CTGGTTTGAACTCAAGTGG
sg049040	KIT	chr4_54698324.0_54698343.0	AAAGAAGACAACGACACGC
sg049041	KIT	chr4_54723618.0_54723637.0	AATGGCATGCTCCAATGTG
sg049042	KIT	chr4_54725948.0_54725967.0	CTAGTGCATTCAAGCACAA
sg049043	KIT	chr4_54695574.0_54695593.0	CAGACTTAATAGTCCGCGT
sg049044	KIT	chr4_54727249.0_54727268.0	TTACGAAACCAATCAGCAA
sg049045	KIT	chr4_54729340.0_54729359.0	TATTCTGTAATGACCAGGG
sg049064	KLB	chr4_39437798.0_39437817.0	ATGCTTACACCATCCGCCG
sg049065	KLB	chr4_39407216.0_39407235.0	GGGACTGGAGCATTGCAAG
sg049066	KLB	chr4_39446566.0_39446585.0	AGGGCCTGTCGGTTCACCG
sg049067	KLB	chr4_39434391.0_39434410.0	GGATGGCGACTATCCAGAG
sg049068	KLB	chr4_39446838.0_39446857.0	GGCAACGACACCTACGGGG
sg049069	KLB	chr4_39446743.0_39446762.0	TGGAAGCACAGCCCAGCGT
sg049130	KLF15	chr3_126352525.0_126352544.0	CGTCATCAGGATCACCCAA
sg049131	KLF15	chr3_126352099.0_126352118.0	GCAGGTTCAAGTTGGAGGA
sg049132	KLF15	chr3_126352176.0_126352195.0	GCAACCTTGACATTCTCTG
sg049133	KLF15	chr3_126352250.0_126352269.0	CTGGATCTGCAGCAACACT
sg049134	KLF15	chr3_126352788.0_126352807.0	TCGCTGTCATCTTCAGAGA
sg049135	KLF15	chr3_126352817.0_126352836.0	CAGCATGTGATATGCCCGC
sg049280	KLHL13	chrX_117909632.0_117909651.0	CCACTCACTTGGTTACACT
sg049281	KLHL13	chrX_117909771.0_117909790.0	ATTAATTACGTGCAAACGG
sg049282	KLHL13	chrX_117920274.0_117920293.0	CATCATGACTCTATGCACA
sg049283	KLHL13	chrX_117919522.0_117919541.0	AAAGTGTTTCTCATATCTG
sg049284	KLHL13	chrX_117899278.0_117899297.0	CTGCATTGCATGTGTACAG
sg049285	KLHL13	chrX_117909837.0_117909856.0	TTGCAGCAAAGTCCATCCG
sg049364	KLHL29	chr2_23639209.0_23639228.0	TATCAATCAGTCCACACCC
sg049365	KLHL29	chr2_23642661.0_23642680.0	ATGTGGCCGTTGCCCACAG
sg049366	KLHL29	chr2_23642818.0_23642837.0	GTATGAGTTCACCGACCCG
sg049367	KLHL29	chr2_23642451.0_23642470.0	GGGGTCACCCCAATGACCG
sg049368	KLHL29	chr2_23703247.0_23703266.0	CTGCAGCCACAGTGTGTGG
sg049369	KLHL29	chr2_23703733.0_23703752.0	CCATTGAGCGTGACAGCGG
sg049382	KLHL31	chr6_53654450.0_53654469.0	GGATTGAACATAATTGACC
sg049383	KLHL31	chr6_53652298.0_53652317.0	TTCAACACCTGGATACACC
sg049384	KLHL31	chr6_53654334.0_53654353.0	GGCGAACAAGAATCCGAGG
sg049385	KLHL31	chr6_53654941.0_53654960.0	GACCCGTCAATTCAGAGGG
sg049386	KLHL31	chr6_53652301.0_53652320.0	GTATCCAGGTGTTGAAGCG
sg049387	KLHL31	chr6_53654160.0_53654179.0	GATTTCTTTATGTAGCCGG
sg049538	KLK5	chr19_50948982.0_50949001.0	GAGCATGAGGTCGTTAGAG
sg049539	KLK5	chr19_50950060.0_50950079.0	GGGCACGGTGTTAGAGGGG
sg049540	KLK5	chr19_50949956.0_50949975.0	TGGGTGTGCATATCGCAGT
sg049541	KLK5	chr19_50949909.0_50949928.0	CCCAACCAGCTCTACTGCG
sg049542	KLK5	chr19_50948670.0_50948689.0	ATGACACCATGTTCTGCGC
sg049543	KLK5	chr19_50949952.0_50949971.0	CGATATGCACACCCAGCCG
sg049550	KLK7	chr19_50979886.0_50979905.0	CTTGACATCCACGCACATG
sg049551	KLK7	chr19_50980282.0_50980301.0	GGTTCCAGGGGGTTCGCAG
sg049552	KLK7	chr19_50980364.0_50980383.0	AGCATGAGGTCATTAACAT
sg049553	KLK7	chr19_50980454.0_50980473.0	ACCTGGGCAGTGATACGCT
sg049554	KLK7	chr19_50981854.0_50981873.0	GGCTCCCACCCATGGCAGG
sg049555	KLK7	chr19_50980262.0_50980281.0	CAGCCGGAGACAGTACAGG
sg049657	KMT2A	chr11_118472414.0_118472433.0	GGGGTCTTAATGATCCGCG
sg049658	KMT2A	chr11_118495738.0_118495757.0	TGACCATAATTATGCTCAG
sg049659	KMT2A	chr11_118502589.0_118502608.0	AGATCAGTAGCGGTCCCGG
sg049660	KMT2A	chr11_118478072.0_118478091.0	GAAAGGACGTCGATCGAGG
sg049661	KMT2A	chr11_118498400.0_118498419.0	GTGAGACAGCAACCCACGG
sg049662	KMT2A	chr11_118472284.0_118472303.0	TTACAGAGGGCAAAAAAGG
sg049669	KMT2C	chr7_152252670.0_152252689.0	CACACGGTCTAGTTCTCAG
sg049670	KMT2C	chr7_152176647.0_152176666.0	TTCAGACATTAGGCCATCG
sg049671	KMT2C	chr7_152177614.0_152177633.0	CCATGCGACGACCTCCCCA
sg049672	KMT2C	chr7_152194010.0_152194029.0	TGTTGCCAATACACAATCA
sg049673	KMT2C	chr7_152174200.0_152174219.0	ATAATGAAAGCCAAAATGG
sg049674	KMT2C	chr7_152179911.0_152179930.0	TATCTAGGTCCTAAAGGAG
sg049675	KMT2D	chr12_49038779.0_49038798.0	GTGGAAATTCCCGCCAACG
sg049676	KMT2D	chr12_49044941.0_49044960.0	CTTCGAAGCGAAAGTACTG
sg049677	KMT2D	chr12_49050075.0_49050094.0	TCGGGGTAGACCTCCATAG
sg049678	KMT2D	chr12_49041159.0_49041178.0	CCCTATCCTAGTCCTACGG
sg049679	KMT2D	chr12_49024636.0_49024655.0	GAGTGGCAGCTCCATAAGG
sg049680	KMT2D	chr12_49053557.0_49053576.0	TGTGGGCATCACTATCACG
sg049783	KRAS	chr12_25245310.0_25245329.0	TGAATTAGCTGTATCGTCA
sg049784	KRAS	chr12_25225722.0_25225741.0	ATGTACCTATGGTCCTAGT
sg049785	KRAS	chr12_25227322.0_25227341.0	AGAGGAGTACAGTGCAATG
sg049786	KRAS	chr12_25227231.0_25227250.0	GATATTCACCATTATAGGT
sg049787	KRAS	chr12_25227297.0_25227316.0	CAGTACATGAGGACTGGGG
sg049788	KRAS	chr12_25227403.0_25227422.0	CCCTTCTCAGGATTCCTAC
sg049873	KRT14	chr17_41586652.0_41586671.0	CCCCCAGAGGAGAAGCGGG
sg049874	KRT14	chr17_41583761.0_41583780.0	GAGGAATGGTTCTTCACCA
sg049875	KRT14	chr17_41584244.0_41584263.0	TATAGTTCTCACCTCCTCG
sg049876	KRT14	chr17_41584974.0_41584993.0	TTGGTGCGGAAGTCATCCG
sg049877	KRT14	chr17_41585003.0_41585022.0	GGCATTGTCAATCTGCAGA
sg049878	KRT14	chr17_41586326.0_41586345.0	CCCTACTTCAAGACCATTG
sg050041	KRT5	chr12_52517169.0_52517188.0	CTCATGCTTGGTGTTGCGG
sg050042	KRT5	chr12_52519872.0_52519891.0	CCTCCTGGAGGTATCCAAG
sg050043	KRT5	chr12_52517714.0_52517733.0	CATGTCTCTGACACCTCAG
sg050044	KRT5	chr12_52520057.0_52520076.0	TATCCATCAGCACTAGTGG
sg050045	KRT5	chr12_52516713.0_52516732.0	CTGGTACTCACGCAGCAGC
sg050046	KRT5	chr12_52518115.0_52518134.0	ACAAACTCATTCTCAGCAG
sg050733	KTI12	chr1_52033287.0_52033306.0	CGCAGTATGCAGTTCCCTG
sg050734	KTI12	chr1_52033538.0_52033557.0	CGCCTGAGTCGCCACGACG
sg050735	KTI12	chr1_52033653.0_52033672.0	GTCCACCACGTACACCGCG
sg050736	KTI12	chr1_52033437.0_52033456.0	CTGCCTGGTCTACTGCGTA
sg050737	KTI12	chr1_52033472.0_52033491.0	CTCTACTGCCTGGCACGGG
sg050738	KTI12	chr1_52033549.0_52033568.0	CTCAGGCGCCGTTCCACGG
sg050751	KY	chr3_134608793.0_134608812.0	CTCGATGAACAGTGCAGGG
sg050752	KY	chr3_134619180.0_134619199.0	CCCAGAAGACCAACTGTGA
sg050753	KY	chr3_134625109.0_134625128.0	CAGGCTAGATCGATCCCAG
sg050754	KY	chr3_134610306.0_134610325.0	ACAGGGCAGAGCTTCTCGG
sg050755	KY	chr3_134620756.0_134620775.0	TGGCAGATCCAGATCCAGA
sg050756	KY	chr3_134610270.0_134610289.0	TGGAATGCTGTGTACCTGG
sg050875	LALBA	chr12_48569096.0_48569115.0	CACAGATGTTCCTTGACTG
sg050876	LALBA	chr12_48569907.0_48569926.0	AAGACATAGATGGTTATGG
sg050877	LALBA	chr12_48569209.0_48569228.0	TAACCACTGGTGTGAAACA
sg050878	LALBA	chr12_48569174.0_48569193.0	GTTGAAAACAATGAAAGCA
sg050879	LALBA	chr12_48569215.0_48569234.0	GTACCATGTTTCACACCAG
sg050880	LALBA	chr12_48569109.0_48569128.0	CAGCCAGGTCCCTCAGTCA
sg051341	LCN10	chr9_136740902.0_136740921.0	GTAGTCAGTGGACAGCACG
sg051342	LCN10	chr9_136741914.0_136741933.0	GTGGTAAAGGTGAACAAAG
sg051343	LCN10	chr9_136741278.0_136741297.0	AACGCCTGTGCATACGCGG
sg051344	LCN10	chr9_136742815.0_136742834.0	GTGCAGGAGTGGTACCCCA
sg051345	LCN10	chr9_136740015.0_136740034.0	TCGAGCTTCCAGAGTCTGA
sg051346	LCN10	chr9_136740876.0_136740895.0	GCTTGGTCTACCTCCGCCT
sg051625	LEP	chr7_128254516.0_128254535.0	TCTGGAAGGCATACTGGTG
[truncated: 1,903 more rows]

## Sheet: Group
Sample_ID	Cell	Assay	MOI	Tissue	Mouse_ID	Seq_ID
H_8	MCF7	s.c	0.3	Flank-Right	1	F004033-6-3
H_23	MCF7	s.c	0.3	Flank-Left	1	F004033-2-7
H_2	MCF7	s.c	0.3	Abdomen	1	F004033-2-3
H_12	MCF7	s.c	0.3	Lung	2	F004033-1-2
H_11	MCF7	s.c	0.3	Flank-Right	2	F004033-1-1
H_10	MCF7	s.c	0.3	Flank-Left	2	F004012-1
H_15	MCF7	s.c	3	Lung	3	F004033-1-5
H_14	MCF7	s.c	3	Flank-Right	3	F004033-1-4
H_13	MCF7	s.c	3	Flank-Left	3	F004033-1-3
H_22	MCF7	s.c	6	Abdomen	4	F004033-2-6
H_21	MCF7	s.c	6	Abdomen	4	F004033-2-5
H_20	MCF7	s.c	6	Lung	4	F004033-2-4
H_19	MCF7	s.c	6	Lung	4	F004033-2-2
H_18	MCF7	s.c	6	Lung	4	F004033-2-1
H_17	MCF7	s.c	6	Flank-Right	4	F004033-1-7
H_16	MCF7	s.c	6	Flank-Left	4	F004033-1-6
H_7	MCF7	s.c	6	Flank-Left	5	F004033-6-2
H_26	MCF7	s.c	6	Lung	5	F004033-2-10
H_25	MCF7	s.c	6	Lung	5	F004033-2-9
H_24	MCF7	s.c	6	Flank-Right	5	F004033-2-8
H_27	MCF7	i.v.	0.3	Lung	6	F004033-3-1
H_33	MCF7	i.v.	0.3	Liver	7	F004033-3-8
H_32	MCF7	i.v.	0.3	Liver	7	F004033-3-7
H_31	MCF7	i.v.	0.3	Liver	7	F004033-3-6
H_30	MCF7	i.v.	0.3	Liver	7	F004033-3-5
H_29	MCF7	i.v.	0.3	Liver	7	F004033-3-3
H_28	MCF7	i.v.	0.3	Liver	7	F004033-3-2
H_36	MCF7	i.v.	0.3	Lung	8	F004033-4-1
H_35	MCF7	i.v.	0.3	Lung	8	F004033-3-10
H_34	MCF7	i.v.	0.3	Liver	8	F004033-3-9
H_39	MCF7	i.v.	3	Colon	9	F004033-4-4
H_38	MCF7	i.v.	3	Colon	9	F004033-4-3
H_37	MCF7	i.v.	3	Colon	9	F004033-4-2
H_42	MCF7	i.v.	3	Colon	10	F004033-5-1
H_41	MCF7	i.v.	3	Lung	10	F004033-4-7
H_40	MCF7	i.v.	3	Lung	10	F004033-4-6
H_47	MCF7	i.v.	3	Lung	11	F004033-5-6
H_46	MCF7	i.v.	3	Lung	11	F004033-5-5
H_45	MCF7	i.v.	3	Lung	11	F004033-5-4
H_44	MCF7	i.v.	3	Lung	11	F004033-5-3
H_43	MCF7	i.v.	3	Lung	11	F004033-5-2
H_49	MCF7	i.v.	3	Lung	12	F004033-5-8
H_48	MCF7	i.v.	3	Lung	12	F004033-5-7
H_50	MCF7	i.v.	3	Lung	13	F004033-5-10
231_4	MDA-MB-231	s.c.	0.3	Lung	27	F004013-8
231_3	MDA-MB-231	s.c.	0.3	Lung	27	F004002-4
231_7	MDA-MB-231	s.c.	0.3	Lung	28	F004011-1
231_6	MDA-MB-231	s.c.	0.3	Lung	28	F004010-12
231_5	MDA-MB-231	s.c.	0.3	Lung	28	F004010-11
231_45	MDA-MB-231	s.c.	0.3	Flank-Left	28	F004010-6
231_9	MDA-MB-231	s.c.	0.3	Lung	29	F004011-11
231_8	MDA-MB-231	s.c.	0.3	Lung	29	F004011-3
231_12	MDA-MB-231	s.c.	0.3	Lung	29	F004016-11
231_11	MDA-MB-231	s.c.	0.3	Lung	29	F004001-9
231_10	MDA-MB-231	s.c.	0.3	Lung	29	F004015-6
231_17	MDA-MB-231	s.c.	0.3	Lung	30	F004011-4
231_16	MDA-MB-231	s.c.	0.3	Lung	30	F004016-7
231_15	MDA-MB-231	s.c.	0.3	Lung	30	F004016-6
231_14	MDA-MB-231	s.c.	0.3	Lung	30	F004002-1
231_13	MDA-MB-231	s.c.	0.3	Lung	30	F004015-7
231_47	MDA-MB-231	s.c.	0.3	Lung	31	F004010-9
231_21	MDA-MB-231	s.c.	0.3	Lung	31	F004001-11
231_20	MDA-MB-231	s.c.	0.3	Lung	31	F004001-10
231_18	MDA-MB-231	s.c.	0.3	Lung	31	F004016-8
231_1	MDA-MB-231	s.c.	0.3	Flank-Left	31	F004016-10
231_27	MDA-MB-231	s.c.	0.3	Lung	32	F004002-8
231_26	MDA-MB-231	s.c.	0.3	Lung	32	F004002-7
231_25	MDA-MB-231	s.c.	0.3	Lung	32	F004002-6
231_24	MDA-MB-231	s.c.	0.3	Lung	32	F004002-3
231_23	MDA-MB-231	s.c.	0.3	Lung	32	F004002-2
231_30	MDA-MB-231	s.c.	0.3	Lung	33	F004002-5
231_29	MDA-MB-231	s.c.	0.3	Lung	33	F004002-10
231_28	MDA-MB-231	s.c.	0.3	Lung	33	F004002-9
231_2	MDA-MB-231	s.c.	0.3	Flank-Right	33	F004011-5
231_34	MDA-MB-231	i.v.	0.3	Lung	34	F004013-2
231_33	MDA-MB-231	s.c.	0.3	Lung	34	F004013-1
231_32	MDA-MB-231	s.c.	0.3	Lung	34	F004002-12
231_31	MDA-MB-231	s.c.	0.3	Lung	34	F004002-11
231_35	MDA-MB-231	i.v.	0.3	Lung	37	F004013-3
231_36	MDA-MB-231	i.v.	0.3	Lung	38	F004013-4
231_37	MDA-MB-231	i.v.	0.3	Lung	39	F004013-5
231_38	MDA-MB-231	i.v.	0.3	Lung	40	F004013-6
231_39	MDA-MB-231	i.v.	0.3	Lung	41	F004013-7
231_40	MDA-MB-231	i.v.	0.3	Lung	42	F004013-9
231_41	MDA-MB-231	i.v.	0.3	Lung	43	F004013-10
231_42	MDA-MB-231	i.v.	0.3	Lung	44	F004010-1
231_43	MDA-MB-231	i.v.	0.3	Lung	45	F004010-4
231_44	MDA-MB-231	i.v.	0.3	Lung	46	F004010-5
231_22	MDA-MB-231	i.v.	0.3	Lung	47	F004001-12
H_9	MCF7	in vitro	0.3	Day30	NA	F004033-6-4
H_1	MCF7	in vitro	0.3	Day0	NA	F004011-12
231_48	MDA-MB-231	in vitro	0.3	Day60	NA	F004010-10
231_46	MDA-MB-231	in vitro	0.3	Day0	NA	F004010-7
231_19	MDA-MB-231	in vitro	0.3	Day30	NA	F004016-9
H_5	MCF7	in vitro	3	Day30	NA	F004033-5-9
H_4	MCF7	in vitro	3	Day0	NA	F004033-4-5
H_3	MCF7	in vitro	3	Day0	NA	F004033-3-4
H_6	MCF7	in vitro	6	Day0	NA	F004033-6-1

## Sheet: Count
Gene	sgRNA	H_1	H_2	H_3	H_4	H_5	H_6	H_7	H_8	H_9	H_10	H_11	H_12	H_13	H_14	H_15	H_16	H_17	H_18	H_19	H_20	H_21	H_22	H_23	H_24	H_25	H_26	H_27	H_28	H_29	H_30	H_31	H_32	H_33	H_34	H_35	H_36	H_37	H_38	H_39	H_40	H_41	H_42	H_43	H_44	H_45	H_46	H_47	H_48
AADAC	chr3_151817522.0_151817541.0	414.59	550.075	411.494	361.515	438.053	178.096	0	210.429	0	134.758	445.309	0	114.863	7.16409	0	93.2985	26.6188	0	0	13.9868	0	0	21.532	29.2422	0	0	0	0	0	0	0	0	0	0	0	0	0	0	0	0	0	0	0	0	0	0	0	0
AADAC	chr3_151817523.0_151817542.0	466.086	405.748	403.125	405.861	289.991	201.611	0	281.53	0	180.42	269.884	0	134.503	3.58204	1.14433	262.751	26.9395	0	0	0	0	6.33235	186.397	12.8666	0.558357	30.5415	0	0	0	0	0	0	0	0	0	0	0	0	0	0	0	0	0	0	0	0	0	0
AADAC	chr3_151824707.0_151824726.0	285.412	60.8168	215.511	204.377	168.212	40.4606	0	55.3005	0	153.691	183.136	0	29.7572	442.127	0.572165	181.812	8.65914	0	0	13.9868	0	0	2.57099	21.0544	0	17.7338	0	0	0	0	0	0	0	0	0	0	0	0	0	0	0	0	0	0	0	0	0	0
AADAC	chr3_151824781.0_151824800.0	205.986	369.44	509.137	400.077	314.522	200.92	4.25687	301.639	0	126.963	341.211	0	133.907	207.759	0.572165	135.562	25.6567	0	0.829035	41.9605	4.59791	12.6647	33.1015	338.04	1957.04	1.97042	0	0	0	0	0	0	2.6809	0	0	0	0	0	0	0	0	0	0	0	0	0	0	0
AADAC	chr3_151827644.0_151827663.0	247.881	596.368	327.103	305.601	304.009	94.0622	0	1960.66	0	353.045	178.638	0	111.292	576.709	2.86082	72.1668	21.4875	0.712284	0	0	0	0	382.435	2.33938	0	8.86689	0	0	0	0	0	0	0	0	0	0	0	0	0	0	0	0	0	0	0	0	0	0
AADAC	chr3_151827689.0_151827708.0	140.524	259.606	117.869	167.743	81.4778	56.3682	0	65.3552	0	164.829	165.143	0	117.839	0.511721	0	28.3085	0	0	0	0	0	6.33235	0	15.7908	0	0	0	0	0	0	0	0	0	0	0	0	0	0	0	0	0	0	0	0	0	0	0	0
AAVS1	chr19_55110243_55110262	624.939	385.778	654.206	644.943	401.256	735.553	4.25687	609.742	0	181.534	116.307	0	368.394	42.9845	0.572165	237.632	88.5156	0	0	13.9868	3.67833	12.6647	252.921	146.504	0.558357	0	0	0	0	0	0	0	0	0	0	0	0	0	0	0	0	0	0	0	0	0	0	0
AAVS1	chr19_55113274_55113293	403.243	556.429	687.683	701.821	738.557	1040.56	0	455.332	0	841.962	307.797	0	224.965	0.511721	1.71649	337.31	309.805	11.0404	11.6065	391.631	29.4267	177.306	21137.1	501.212	17.8674	148.767	0	0	0	0	0	0	0	0	0	0	0	0	0	0	0	0	0	0	0	0	0	0
AAVS1	chr19_55113733_55113752	420.699	239.636	301.297	410.681	139.301	44.6104	4.25687	147.229	0	322.975	195.345	0	31.5426	28.6563	0	13.5562	7.3763	2.84914	4288.6	111.895	5.5175	44.3265	10.284	1.75453	2.79179	1.97042	0	0	0	0	0	0	0	0	0	0	0	0	0	0	0	0	0	0	0	0	0	0
AAVS1	chr19_55115176_55115195	405.862	630.861	655.601	690.253	831.424	320.572	4.25687	283.685	0	170.397	573.825	0	126.766	259.442	0	17.1446	468.876	112.541	0.414518	13.9868	0	6.33235	249.065	179.547	0.558357	27.5859	0	0	0	0	0	0	0	0	0	0	0	0	0	0	0	0	0	0	0	0	0	0
AAVS1	chr19_55115824_55115843	377.931	207.866	348.724	588.064	169.088	87.8375	4.25687	165.183	0	116.939	146.509	0	1427.75	6.65237	4.57732	13.5562	119.624	417.042	0.414518	0	2.75875	25.3294	51.7411	793.927	1.11671	355.661	0	0	0	0	0	0	0	0	0	0	0	0	0	0	0	0	0	0	0	0	0	0
AAVS1	chr19_55129686_55129705	255.736	295.007	654.903	884.025	684.238	318.843	0	189.602	0	121.394	262.173	0	385.058	103.368	2.28866	106.057	59.6518	221.52	14.9226	27.9737	0.919583	0	886.67	30.9968	2.79179	0	0	0	0	0	0	0	0	0	0	0	0	0	0	0	0	0	0	0	0	0	0	0
AAVS1	chr19_55132952_55132971	290.649	382.148	338.959	156.175	299.628	154.234	0	1457.21	0	556.853	249.322	0	102.365	73.176	0.572165	19.5369	102.306	0.356142	0	0	0	6.33235	6.42747	17.2529	0	0.985209	0	0	0	0	0	0	0	0	0	0	0	0	0	0	0	0	0	0	0	0	0	0
AAVS1	chr19_55140850_55140869	551.623	216.036	382.899	274.751	495.876	527.371	0	292.303	0	428.777	114.38	0	170.806	736.366	2.28866	84.5268	30.4673	970.131	0	13.9868	3.67833	6.33235	143.333	7.89541	0	1322.15	0	0	0	0	0	0	0	0	0	0	0	0	0	0	0	0	0	0	0	0	0	0
AAVS1	chr19_55145545_55145564	650.251	1051.13	1180.78	869.564	1044.32	565.065	8.51374	467.541	0	392.025	560.331	0	33080.5	923.656	116.722	354.056	349.893	1.78071	2.48711	111.895	5.5175	37.9941	64.2747	1209.46	4378.64	799.99	0	0	0	0	0	0	0	0	0	0	0	0	0	0	0	0	0	0	0	0	0	0
AAVS1	chr19_55145640_55145659	251.372	205.143	322.918	221.729	310.141	52.5642	0	130.71	0	357.5	359.846	0	136.883	43.4962	2.28866	1.99356	65.1039	12.465	1.24355	0	0	0	6.42747	176.916	0	0	0	0	0	0	0	0	0	0	0	0	0	0	0	0	0	0	0	0	0	0	0	0
AAVS1	chr19_55146243_55146262	788.157	1230.86	701.632	703.749	478.354	104.091	4.25687	308.103	0	943.309	392.617	0	329.71	138.676	613.361	101.273	88.5156	6.7667	10775	447.579	22.07	94.9853	355.118	35.968	11.1671	16.7486	0	0	0	0	0	0	0	0	0	0	0	0	0	0	0	0	0	0	0	2.64664	0	1173.33
AAVS1	chr19_55146360_55146379	1584.17	1165.5	968.754	1313.02	1368.48	658.09	12.7706	1055.02	0	1381	2534.34	0	477.901	2464.45	1.14433	642.723	74.0837	207.987	75.8567	139.868	7.35666	44.3265	72.9518	97.9615	3.35014	7553.6	0	0	0	0	0	0	0	0	0	0	0	0	0	0	0	0	0	0	0	0	0	0
AAVS1	chr19_55147049_55147068	207.731	91.6791	400.335	528.294	382.858	150.43	0	90.4918	0	222.741	124.018	0	64.2756	98.7621	0.572165	143.137	5.13134	0.712284	0	0	0	0	37.6007	0	0	0	0	0	0	0	0	0	0	0	0	0	0	0	0	0	0	0	0	0	0	0	0	0
AAVS1	chr19_55154191_55154210	443.393	363.993	387.781	272.823	547.566	233.772	4.25687	403.622	0	247.243	341.853	0	291.621	1223.52	22.3144	303.419	31.7502	0	0	0	0	0	36.6366	7.60298	0.558357	13.7929	0	0	0	0	0	0	0	0	0	0	0	0	0	0	0	0	0	0	0	0	0	0
AAVS1	chr19_55154818_55154837	691.274	837.82	594.923	535.042	686.867	345.817	4.25687	651.397	0	288.45	407.397	0	366.014	371.509	0	53.0286	99.4197	0	0.829035	13.9868	1.83917	0	88.6991	429.861	0	22.6598	11.836	9.21773	1.97475	0	15607.6	0	0	9.05389	1.27605	3281.35	0	0	0	0	0	0	0	0	0	0	0	0
AAVS1	chr19_55156373_55156392	1121.57	903.175	729.53	573.604	940.061	347.892	12.7706	341.14	0	488.917	605.954	0	371.965	255.349	1.71649	237.233	657.453	0.712284	236.69	69.9342	0.919583	6.33235	40.1717	3.80149	0.558357	1030.53	0	0	0	0	0	0	0	0	0	0	0	0	0	0	0	0	0	0	0	0	0	0
AAVS1	chr19_55157285_55157304	666.835	511.043	645.836	523.474	618.53	903.274	4.25687	315.285	0	356.386	289.804	0	679.655	177.567	5.14948	198.957	1436.45	1.78071	1.65807	41.9605	0.919583	12.6647	339.371	175.161	2.79179	7.88168	0	0	0	0	0	0	0	0	0	0	0	0	0	0	0	0	0	0	0	0	0	0
AAVS1	chr19_55158961_55158980	312.47	220.574	382.201	282.464	189.239	112.045	8.51374	537.923	0	44.5483	41.7678	0	98.7939	93.6449	0.572165	39.8711	13.1491	0.356142	0	13.9868	0	0	53.9908	26.0256	0	0	0	0	0	0	0	0	0	0	0	0	0	0	0	0	0	0	0	0	0	0	0	0
AAVS1	chr19_55159518_55159537	212.095	38.124	544.706	657.475	431.044	225.127	0	279.375	0	327.43	144.581	0	47.6115	7.67581	3.43299	22.3278	14.1112	1.06843	2.07259	13.9868	5.5175	37.9941	3.53511	1.75453	5982.24	2.95563	0	0	0	0	0	0	0	0	0	0	0	0	0	0	0	0	0	0	0	0	0	0
AAVS1	chr19_55161899_55161918	495.762	245.99	368.252	327.774	126.159	241.034	0	480.468	0	249.47	413.18	0	61.2999	0.511721	0	313.786	360.156	1.42457	305.914	41.9605	2.75875	12.6647	416.179	5.84845	0.558357	8.86689	0	0	0	0	0	0	0	0	0	0	0	0	0	0	0	0	0	0	0	0	0	0
AAVS1	chr19_55165697_55165716	539.403	381.24	442.182	414.537	311.017	176.021	4.25687	428.759	0	483.349	145.223	0	77.9639	734.319	1.14433	66.1861	36.2401	1595.87	1.65807	41.9605	2.75875	12.6647	240.387	566.715	1.67507	4.92605	0	0	0	0	0	0	0	0	0	0	0	0	0	0	0	0	0	0	0	0	0	0
AAVS1	chr19_55166101_55166120	629.304	227.836	587.948	553.359	477.478	331.984	0	179.547	0	376.433	1111.67	0	117.243	99.7855	6.29381	177.825	170.296	0	0	27.9737	0.919583	0	204.072	15.206	2.23343	2.95563	0	0	0	0	0	0	0	0	0	0	0	0	0	0	0	0	0	0	0	0	0	0
AAVS1	chr19_55166779_55166798	831.798	582.752	481.936	345.126	416.15	978.316	4.25687	221.92	0	544.602	233.257	0	291.026	27.6329	0.572165	507.958	301.787	2.13685	1.65807	27.9737	3.67833	6.33235	1298.35	20.4696	0	6.89647	0	0	0	0	0	0	0	0	0	0	0	0	0	0	0	0	0	0	0	0	0	0
AAVS1	chr19_55166812_55166831	1227.19	1164.6	954.805	938.011	966.344	663.968	0	514.941	0	982.289	954.876	0	682.035	69.594	3.43299	648.305	259.453	1.06843	0.414518	13.9868	3.67833	18.9971	403.967	196.8	0	0.985209	0	0	0	0	0	0	0	0	0	0	0	0	0	0	0	0	0	0	0	0	0	0
AAVS1	chr19_55173497_55173516	427.682	294.099	468.685	485.876	782.362	374.52	4.25687	257.83	0	338.567	305.869	0	277.932	159.145	18.8814	218.494	263.302	1.78071	2.07259	97.9078	11.035	56.9912	3880.59	474.309	1.67507	17.7338	0	0	0	0	0	0	0	0	0	0	0	0	0	0	0	0	0	0	0	0	0	0
AAVS1	chr19_55173844_55173863	117.831	6.354	432.417	571.676	154.195	142.477	4.25687	220.484	0	2.22741	37.2697	0	61.2999	400.165	0.572165	61.0028	29.8259	0	0	0	1.83917	0	483.667	168.435	0	2.95563	0	0	0	0	0	0	0	0	0	0	0	0	0	0	0	0	0	0	0	0	0	0
AAVS1	chr19_55174057_55174076	785.538	842.358	494.49	330.666	687.743	477.919	4.25687	308.103	0	621.448	127.231	0	318.402	572.615	121.871	179.42	14.4319	0.712284	0	41.9605	3.67833	25.3294	681.312	1838.46	17.3091	26.6007	0	0	0	0	0	0	0	0	0	0	0	0	0	0	0	0	0	0	0	0	0	0
AAVS1	chr19_55174685_55174704	682.546	406.656	463.105	453.099	385.486	291.869	0	753.38	0	295.132	377.195	0	111.887	144.305	0	120.411	69.5938	1054.18	3.31614	181.829	9637.23	37.9941	320.088	2.04696	6.14193	6.89647	0	0	0	0	0	0	0	0	0	0	0	0	0	0	0	0	0	0	0	0	0	0
AAVS1	chr19_55175774_55175793	229.552	384.871	513.321	606.381	635.177	242.418	0	718.907	0	128.076	165.143	0	436.836	512.232	1.14433	155.497	46.1821	7.12284	6.63228	405.618	28288.2	101.318	2151.92	2019.76	11.7255	84.728	0	0	0	0	0	0	0	0	0	0	0	0	0	0	0	0	0	0	0	0	0	0
AAVS1	chr19_55177659_55177678	647.633	673.524	675.827	856.068	571.221	386.969	8.51374	331.803	0	310.724	499.928	0	517.775	5649.91	6.86598	3336.02	160.034	469.039	2.90162	97.9078	2.75875	18.9971	875.743	85.3873	608.61	38.4232	0	0	0	0	0	0	0	0	0	0	0	0	0	0	0	0	0	0	0	0	0	0
AAVS1	chr19_55180626_55180645	396.26	681.693	702.33	658.439	583.486	455.787	8.51374	425.886	0	1044.66	710.695	0	619.545	628.905	25.7474	191.381	148.167	37.3949	0	13.9868	0.919583	0	336.157	106.442	0	0.985209	0	0	0	0	0	0	0	0	0	0	0	0	0	0	0	0	0	0	0	0	0	0
AAVS1	chr19_55181961_55181980	1013.34	934.038	934.579	697.001	1061.84	1322.06	8.51374	807.244	0	859.781	462.016	0	4005.92	259.954	21.1701	459.316	1901.8	1991.9	4.55969	83.921	4.59791	44.3265	86.1281	251.483	4.46686	3.94084	0	0	0	0	0	0	0	0	0	0	0	0	0	0	0	0	0	0	0	0	0	0
AAVS1	chr19_55181971_55181990	645.887	361.27	763.705	799.189	538.805	1258.08	0	270.757	0	437.687	788.448	0	292.811	259.954	0	358.442	998.045	1.42457	27.3582	13.9868	2.75875	18.9971	26.674	50.8815	2.79179	4.92605	0	0	0	0	0	0	0	0	10.2084	0	0	0	0	0	0	0	0	0	0	0	0	0
AAVS1	chr19_55197600_55197619	266.21	299.546	475.659	348.018	206.761	509.388	0	198.938	0	238.333	209.482	0	104.745	1301.31	2.28866	120.81	0.962126	0.712284	0	0	0.919583	0	8.03434	22.8089	1.11671	0.985209	0	0	0	0	0	0	0	0	0	0	0	0	0	0	0	0	0	0	0	0	0	0
AAVS1	chr19_55205662_55205681	407.607	333.131	539.127	663.26	490.619	667.427	8.51374	168.774	0	336.339	547.479	0	310.665	214.923	348.448	200.951	286.072	15458.7	9.11939	139.868	16.5525	145.644	78.4152	93.2828	12.8422	37.438	0	0	0	0	0	0	0	0	0	0	0	0	0	0	0	0	0	0	0	0	0	0
AAVS1	chr19_55214145_55214164	1003.74	932.222	1018.27	1202.16	1096.88	418.093	8.51374	530.023	0	543.489	527.559	0	254.127	300.892	524.675	269.13	392.547	648.891	0.829035	97.9078	7.35666	31.6618	3258.09	666.723	2.79179	62.0682	4.73442	0	0	0	0	0	0	0	0	0	0	0	0	0	0	0	0	0	0	0	0	0
AAVS1	chr19_55216465_55216484	477.433	788.803	516.809	296.924	377.601	183.975	4.25687	1134.02	0	200.467	242.253	0	217.228	491.252	2.86082	46.6492	36.8815	1.42457	18.6533	41.9605	0	14931.7	67.1671	96.7918	0.558357	9.85209	0	9.21773	13.8233	0	18944.9	5.46598	5.3618	0	0	12.1531	0	0	0	0	0	0	0	0	0	0	0	0
AAVS1	chr19_55223769_55223788	1157.36	1208.17	690.473	714.354	1040.81	743.852	4.25687	524.278	0	1313.06	980.579	0	577.885	60.383	2.28866	585.308	313.653	1.06843	299.696	55.9473	2.75875	37.9941	17.6755	470.508	0.558357	726.099	0	0	0	0	0	0	0	0	0	0	0	0	0	0	0	0	0	0	0	0	0	0
AAVS1	chr19_55226953_55226972	467.832	678.062	262.938	172.563	65.7079	52.91	0	0	0	77.9594	32.7717	0	73.7979	111.043	0	4.78454	28.2224	0	0	0	0	6.33235	96.0907	0.584845	0	0	0	0	0	0	0	0	0	0	0	0	897.704	13.3938	2.264	1.33922	1.86992	0	2.7833	0	0	0	0	0
AAVS1	chr19_55227246_55227265	210.35	199.697	317.339	319.097	417.026	190.545	0	229.102	0	192.671	343.781	0	165.45	39.9142	1015.59	117.221	118.342	0	0	13.9868	0	6.33235	23.4603	191.537	0	1.97042	0	0	0	0	0	0	0	0	0	0	0	0	0	0	0	0	0	0	0	0	0	0
AAVS1	chr19_55228028_55228047	580.426	400.302	308.969	214.017	435.424	291.178	4.25687	344.012	0	348.59	138.155	0	256.507	595.131	19.4536	90.1088	53.5584	5.34213	21.5549	13.9868	0.919583	6.33235	24.103	28.365	0	0	0	0	0	0	0	0	0	0	0	0	0	0	0	0	0	0	0	0	0	0	0	0
AAVS1	chr19_55230511_55230530	869.329	936.761	945.041	962.112	671.097	971.054	0	478.314	0	827.484	1384.76	0	233.892	367.927	10.299	1531.45	305.956	2.49299	2.48711	41.9605	4.59791	31.6618	221.748	19.5923	3021.27	18.719	0	0	0	0	0	0	0	0	0	0	0	0	0	0	0	0	0	0	0	0	0	0
AAVS1	chr19_55230646_55230665	195.512	168.835	289.441	209.197	268.088	98.212	0	159.438	0	228.31	221.691	0	66.061	0	0	31.8969	25.6567	2.49299	30.6743	55.9473	9.19583	37.9941	6073	5.84845	2.23343	26.6007	0	0	0	0	0	0	0	0	0	0	0	0	0	0	0	0	0	0	0	0	0	0
AAVS1	chr19_55231945_55231964	258.355	268.683	374.529	392.364	441.557	234.81	0	188.884	0	290.677	236.47	0	401.127	669.842	2.28866	127.588	22.7703	0	0	0	0.919583	0	164.543	7.01814	0.558357	0	0	0	0	0	0	0	0	0	0	0	0	0	0	0	0	0	0	0	0	0	0	0
AAVS1	chr19_55232392_55232411	567.333	412.102	318.733	408.753	437.177	338.209	8.51374	137.892	0	248.357	886.763	0	126.171	1.02344	0.572165	98.8804	96.2126	2.84914	3.73066	97.9078	10.1154	69.6559	7.39159	2396.69	5075.47	8.86689	0	0	0	0	0	0	0	0	0	0	0	0	0	0	0	0	0	0	0	0	0	0
AAVS1	chr19_55239310_55239329	253.118	1281.69	453.341	493.589	438.929	551.578	0	516.378	0	259.494	760.817	0	108.911	78.805	1.71649	312.988	222.572	23155.6	22.384	363.658	22.07	158.309	68.4526	54.9754	16.7507	186.205	0	0	0	0	0	0	0	0	0	0	0	0	0	0	0	0	0	0	0	0	0	0
AAVS1	chr19_55241090_55241109	1264.72	860.513	826.475	691.217	790.247	272.158	4.25687	1671.94	0	2009.13	1533.2	288.655	1679.5	838.198	16978.4	226.867	3360.39	258.559	24.4565	69.9342	5.5175	50.6588	790.9	297.978	11.1671	189.16	0	0	0	0	0	0	0	0	0	0	0	0	0	0	0	0	0	0	0	0	0	0
AAVS1	chr19_55241216_55241235	789.03	580.937	557.26	414.537	894.504	202.995	1268.55	1441.41	0	497.827	215.907	0	354.111	24.5626	8.01031	78.9449	313.653	12.8211	0	41.9605	1.83917	12.6647	715.699	64.0405	0.558357	0	0	0	0	0	0	0	0	0	0	0	0	0	0	0	0	0	0	0	0	0	0	0
AAVS1	chr19_55241337_55241356	760.227	802.419	744.874	434.782	945.318	1411.28	4.25687	654.988	0	513.419	762.102	0	738.574	1775.67	1.71649	747.185	298.901	158.483	1.65807	69.9342	3.67833	69.6559	321.695	1903.96	6.14193	21.6746	0	0	0	0	0	0	0	0	0	0	0	0	0	0	0	0	0	0	0	0	0	0
AAVS1	chr19_55248462_55248481	606.61	430.256	516.111	518.654	487.991	494.518	12.7706	499.859	0	371.978	460.731	0	217.823	2.04688	533.83	290.262	264.905	85.118	1.24355	69.9342	6.43708	25.3294	408.144	12.8666	2.79179	2913.26	0	0	0	0	0	0	0	0	0	0	0	0	0	0	0	0	0	0	0	0	0	0
ABCA10	chr17_69150031.0_69150050.0	493.144	424.81	813.921	1068.16	432.796	658.435	0	211.148	0	238.333	405.469	0	102.365	23.5391	165.356	431.406	103.268	0.356142	0.414518	13.9868	1.83917	6.33235	210.821	6.14087	0	14.7781	0	0	0	0	0	0	0	0	0	0	0	0	0	0	0	0	0	0	0	0	0	0
ABCA10	chr17_69154241.0_69154260.0	209.477	197.882	531.455	314.277	532.672	622.125	0	974.582	0	1059.13	244.824	0	41.065	121.278	18.8814	527.495	12.5076	1.06843	0.414518	41.9605	2.75875	18.9971	326.194	7.31056	1.67507	2029.53	0	0	0	0	0	0	0	0	0	0	0	0	0	0	0	0	0	0	0	0	0	0
ABCA10	chr17_69182770.0_69182789.0	1045.64	1060.21	841.122	769.304	1027.67	1341.42	0	656.425	0	444.369	370.77	0	364.823	202.641	2.28866	202.944	79.5358	1.06843	0.829035	69.9342	3.67833	12.6647	342.263	274.292	3.35014	0	0	0	0	0	0	0	0	0	0	0	0	0	0	0	0	0	0	0	0	0	0	0
ABCA10	chr17_69193140.0_69193159.0	542.021	541.905	441.484	442.494	99.876	239.651	0	324.621	0	128.076	65.5433	0	51.1824	0.511721	0	41.0673	11.5455	0	0	0	0	0	0	91.8206	0	1.97042	0	0	0	0	0	0	0	0	0	0	0	0	0	0	0	0	0	0	0	0	0	0
ABCA10	chr17_69193944.0_69193963.0	345.637	470.196	236.435	238.118	232.168	104.437	4.25687	23.7002	0	33.4112	132.372	0	12.498	16.8868	302.103	244.011	1.28283	0	0	0	0	0	81.3075	10.2348	0	0	0	0	0	0	0	0	0	0	0	0	0	0	0	0	0	0	0	0	0	0	0	0
ABCA10	chr17_69215964.0_69215983.0	223.442	69.894	255.963	175.455	171.717	77.8088	4.25687	20.1093	0	15.5919	17.3497	0	51.7775	488.181	1.14433	3.5884	23.7324	0	0	13.9868	0	0	14.1404	0.877267	0.558357	11.8225	0	0	0	0	0	0	0	0	0	0	0	0	0	0	0	0	0	0	0	0	0	0
ABCA6	chr17_69081113.0_69081132.0	467.832	609.984	539.824	768.34	486.239	273.541	4.25687	138.61	0	308.497	237.755	0	66.061	3.07032	2.86082	60.6041	135.98	239.327	15.7517	0	2.75875	0	46.5992	0	0.558357	0.985209	0	0	0	0	0	0	0	0	0	0	0	0	0	0	0	0	0	0	0	0	0	0
ABCA6	chr17_69106086.0_69106105.0	469.577	629.046	622.123	584.208	597.504	163.917	8.51374	546.542	0	1064.7	296.23	0	340.422	15.3516	2.86082	228.063	8.33843	367.539	2.07259	41.9605	0.919583	0	102.84	748.309	6.14193	4.92605	0	0	0	0	0	0	0	0	0	0	0	0	0	0	0	0	0	0	0	0	0	0
ABCA6	chr17_69106111.0_69106130.0	603.119	922.237	625.61	593.849	808.645	821.661	17.0275	657.861	0	1007.9	919.534	0	489.209	43.4962	33.1856	212.114	73.4423	0	0.829035	27.9737	1.83917	6.33235	1057	39.1846	0	3.94084	0	0	0	0	0	0	0	0	0	0	0	0	0	0	0	0	0	0	0	0	0	0
ABCA6	chr17_69124969.0_69124988.0	219.078	166.112	484.726	326.81	417.026	162.534	0	107.01	0	196.012	85.4633	0	229.726	102.344	1.71649	37.8776	137.584	3.91756	2.48711	139.868	13112.3	50.6588	38.8862	1227.59	941.391	10.8373	0	0	0	0	0	0	0	0	0	0	0	0	0	0	0	0	0	0	0	0	0	0
ABCA6	chr17_69133842.0_69133861.0	722.695	930.407	1194.03	948.615	1109.15	806.791	12.7706	491.959	0	1522.44	866.843	0	363.038	782.932	3.43299	262.352	657.774	274.229	1.65807	55.9473	4.59791	50.6588	295.664	30.7044	1733.14	731.025	0	0	0	0	0	0	0	0	0	0	0	0	0	0	0	0	0	0	0	0	0	0
ABCA6	chr17_69136214.0_69136233.0	0	116.187	184.824	170.635	165.584	62.247	0	56.0187	0	22.2741	178.638	0	52.9678	0	3.43299	3.98711	0	0	0	0	0	0	7.71297	39.477	0	0	0	0	0	0	0	0	0	0	0	0	0	0	0	0	0	0	0	0	0	0	0	0
ABCA8	chr17_68903349.0_68903368.0	204.24	177.912	238.527	458.883	254.947	107.203	4.25687	453.895	0	89.0965	339.926	0	35.1135	0	0	21.9291	33.3537	0	0	0	0	0	25.7099	2.04696	0	0	0	0	0	0	0	0	0	0	0	0	0	0	0	0	0	0	0	0	0	0	0	0
ABCA8	chr17_68907789.0_68907808.0	193.766	255.975	303.39	346.09	219.902	80.5753	4.25687	178.829	0	171.511	75.182	0	125.575	4.60548	4.57732	80.141	2.56567	53.4213	0	0	0.919583	6.33235	60.0969	5.84845	0	0	0	0	0	0	0	0	0	0	0	0	0	0	0	0	0	0	0	0	0	0	0	0
ABCA8	chr17_68924824.0_68924843.0	173.691	197.882	218.998	223.657	283.858	44.9562	0	501.296	0	20.0467	5.14065	0	19.0446	0.511721	0	17.5433	8.65914	0	0	0	0	0	13.4977	0.877267	0	0	0	0	0	0	0	0	0	0	0	0	0	0	0	0	0	0	0	0	0	0	0	0
ABCA8	chr17_68929144.0_68929163.0	1535.29	1432.37	1009.21	992.961	1520.04	810.249	21.2843	1453.61	0	1787.5	870.698	0	1077.21	535.771	2439.14	274.712	3812.59	1.42457	0.829035	125.882	6.43708	50.6588	118.908	477.818	1.67507	28.5711	0	0	0	0	0	0	0	0	0	0	0	0	0	0	0	0	0	0	0	0	0	0
ABCA8	chr17_68929147.0_68929166.0	899.878	786.08	359.185	309.457	374.097	225.127	0	970.273	0	247.243	628.445	0	427.314	53.2189	0	1105.63	34.3158	0.356142	0.414518	13.9868	1.83917	12.6647	170.007	0.584845	0	1.97042	0	0	0	0	0	0	0	0	0	0	0	0	0	0	0	0	0	0	0	0	0	0
ABCA8	chr17_68932343.0_68932362.0	715.713	755.218	582.369	492.625	522.159	308.123	0	744.762	0	800.755	408.039	0	376.131	148.911	1.71649	207.33	21.4875	0.356142	0	0	0.919583	12.6647	135.941	81.2934	0	0.985209	0	0	0	0	0	0	0	0	0	0	0	0	0	0	35.5284	0	0	0	0	0	0	0
ABCA9	chr17_69018499.0_69018518.0	384.914	265.96	340.354	342.234	282.982	148.01	0	0	0	49.0031	569.97	0	45.231	0	0	75.7552	3.5278	0	0	0	0	0	0	25.7332	0	0.985209	0	0	0	0	0	0	0	0	0	0	0	0	0	0	0	0	0	0	0	0	0	0
ABCA9	chr17_69021827.0_69021846.0	341.273	261.422	553.076	391.4	438.053	278.037	4.25687	219.048	0	288.45	236.47	0	252.341	240.509	0	43.4595	11.8662	1.06843	1.65807	27.9737	3.67833	37.9941	985.653	47.3724	1.11671	2592.09	0	0	0	0	0	0	0	0	0	0	0	0	0	0	0	0	0	0	0	0	0	0
ABCA9	chr17_69026461.0_69026480.0	172.818	82.602	179.941	153.282	247.062	28.0112	0	201.093	0	472.212	382.336	0	110.697	4.60548	0.572165	27.1124	7.05559	1.78071	0.829035	69.9342	5.5175	18.9971	3127.61	5.55603	3.9085	8.86689	0	0	0	0	0	0	0	0	0	0	0	0	0	0	0	0	0	0	0	0	0	0
ABCA9	chr17_69026978.0_69026997.0	528.056	224.205	506.347	339.342	314.522	227.548	0	149.383	0	226.082	363.059	0	137.478	107.461	1.14433	213.311	5.13134	120.732	0	13.9868	0.919583	6.33235	4.17786	1.16969	0	0.985209	0	0	0	0	0	0	0	0	0	0	0	0	0	0	0	0	0	0	0	0	0	0
ABCA9	chr17_69035246.0_69035265.0	1038.66	1040.24	718.371	688.325	579.106	625.583	0	624.106	0	995.654	1247.89	1443.27	320.783	100.809	4.00515	197.761	80.1772	5.34213	0.829035	27.9737	5.5175	6.33235	1193.26	181.594	0	31.5267	0	0	0	0	0	0	0	0	0	0	0	0	0	0	0	0	0	0	0	0	0	0
ABCA9	chr17_69045322.0_69045341.0	210.35	550.075	486.121	416.465	266.336	413.943	12.7706	188.884	0	591.378	171.569	0	189.256	0.511721	0	11.5626	1329.02	0	1.24355	27.9737	0	18.9971	92.877	2.04696	0.558357	0	0	0	0	0	0	0	0	0	0	0	0	0	0	0	0	0	0	0	0	0	0	0
ABCB5	chr7_20628764.0_20628783.0	273.193	378.517	248.291	194.736	326.787	158.038	0	211.148	0	197.126	173.497	0	139.264	15.8633	0	6.37938	1.60354	1.78071	2.07259	69.9342	6.43708	69.6559	9.64121	2182.93	2919.65	17.7338	0	0	0	0	0	0	0	0	0	0	0	0	0	0	0	0	0	0	0	0	0	0
ABCB5	chr7_20643576.0_20643595.0	519.328	656.277	514.716	239.082	734.176	385.932	0	934.364	0	199.353	765.315	0	282.098	1.02344	111.572	7683.57	113.21	38.8195	46.0115	125.882	8.27625	94.9853	68.1312	3.80149	13.4006	2169.43	0	0	0	0	0	0	0	0	0	0	0	0	0	0	0	0	0	0	0	0	0	0
ABCB5	chr7_20647592.0_20647611.0	536.785	666.262	517.506	360.551	649.194	128.644	8.51374	660.734	0	302.928	282.736	0	188.661	9.21097	37.7629	464.1	122.19	4.62985	2.07259	97.9078	6.43708	18.9971	118.265	3187.99	1041.9	59.1126	0	0	0	0	0	0	0	0	0	0	0	0	0	0	0	0	0	0	0	0	0	0
ABCB5	chr7_20651407.0_20651426.0	569.952	589.106	341.749	328.738	412.646	185.704	0	254.957	0	212.718	125.946	0	32.1378	592.061	0	53.0286	310.125	0	0.414518	13.9868	1.83917	0	79.3793	49.7118	0.558357	0	0	0	0	0	0	0	0	0	0	0	0	0	0	0	0	0	0	0	0	0	0	0
ABCB5	chr7_20658530.0_20658549.0	516.71	507.412	505.649	347.054	416.15	165.3	0	75.4098	0	130.304	111.809	0	371.37	621.74	17.1649	833.307	47.7856	1.06843	1.65807	97.9078	0	25.3294	264.812	160.54	1110.57	2198	0	0	0	0	0	0	10.7236	0	0	0	0.900405	0	0	4.01766	0	2.56239	4689.87	0	10.4527	0	0	0
ABCB5	chr7_20681510.0_20681529.0	898.132	521.028	816.711	623.734	759.583	396.306	17.0275	506.323	0	413.185	508.282	0	457.071	1389.83	0.572165	185.8	445.785	0.356142	116.479	13.9868	0.919583	12.6647	86.1281	16.9605	0.558357	3.94084	0	4.60887	0	0	4.75406	0	0	0	0	0	0	0	0	0	0	0	0	0	0	0	0	0
ABCD2	chr12_39573704.0_39573723.0	124.813	109.833	143.674	223.657	198.876	23.5156	4.25687	10.7728	0	17.8193	56.5472	0	36.8989	26.0977	0	0	0	0	0	0	0	0	0	1.16969	0	0	0	0	0	0	0	0	0	0	0	0	0	0	0	0	0	0	0	0	0	0	0	0
ABCD2	chr12_39603934.0_39603953.0	517.583	446.595	341.749	388.508	500.256	500.397	0	231.975	0	336.339	273.097	0	29.1621	232.833	0	234.442	69.5938	0	0.414518	13.9868	0.919583	18.9971	0.642747	261.426	0	0.985209	0	0	0	0	0	0	0	0	0	0	0	0	0	0	0	0	0	0	0	0	0	0
ABCD2	chr12_39604773.0_39604792.0	886.786	1063.84	563.537	396.22	650.07	1036.76	0	953.755	0	943.309	650.293	0	226.75	251.255	38.9072	610.826	4066.27	7.47898	9.53391	293.724	14877.9	132.979	59.1327	3156.99	7.25865	34.4823	0	0	0	0	0	0	0	0	0	0	0	0	0	0	0	0	0	0	0	0	0	0
ABCD2	chr12_39607622.0_39607641.0	929.554	1115.58	850.886	819.434	954.955	588.58	29.7981	11488.1	0	704.976	2285.66	0	232.701	313.685	87.5412	549.026	80.8186	51.9967	0.829035	0	2.75875	31.6618	747.194	410.853	1.11671	1.97042	0	0	0	0	0	0	0	0	0	0	0	0	0	0	0	0	0	0	0	0	0	0
ABCD2	chr12_39618981.0_39619000.0	419.827	132.526	384.991	376.94	317.15	128.644	4.25687	21.5457	0	2292.01	823.79	0	41.065	2.04688	0	75.7552	260.736	0.356142	0.414518	0	0.919583	12.6647	1.28549	3.50907	0	0.985209	0	0	0	0	0	0	0	0	0	0	0	0	0	0	0	0	0	0	0	0	0	0
ABCD2	chr12_39619121.0_39619140.0	461.722	481.996	316.641	321.989	356.575	290.14	0	331.803	0	240.561	897.686	0	209.491	28.6563	0	218.095	22.1289	0.356142	0.414518	0	0.919583	12.6647	118.587	3.50907	0.558357	1.97042	0	0	0	0	0	0	0	0	0	0	0	0	0	0	0	0	0	0	0	0	0	0
ABI3BP	chr3_100796429.0_100796448.0	780.301	814.219	489.608	603.489	312.77	372.445	17.0275	61.7642	0	776.253	382.979	0	554.674	88.5277	1.14433	240.024	13.7905	0.712284	0.414518	0	0.919583	0	22.8175	31.5816	0.558357	0	0	0	0	0	0	0	0	0	0	0	0	0	0	0	0	0	0	0	0	0	0	0
ABI3BP	chr3_100848851.0_100848870.0	521.947	266.868	447.761	332.594	326.787	156.655	0	117.065	0	360.841	235.827	0	113.673	172.962	1.14433	188.989	47.7856	90.8162	1.65807	41.9605	0.919583	25.3294	14.4618	10.8196	2209.98	0.985209	0	0	0	0	0	0	0	0	0	0	0	0	0	0	0	0	0	0	0	0	0	0
ABI3BP	chr3_100851876.0_100851895.0	202.494	299.546	587.251	458.883	424.035	250.026	0	194.629	0	71.2772	508.282	0	522.537	6.65237	4.57732	64.5913	47.4649	6.05442	2.07259	181.829	8.27625	56.9912	8845.49	33.6286	10.6088	51.2309	0	0	0	0	0	0	0	0	0	0	0	0	0	0	0	0	0	0	0	0	0	0
ABI3BP	chr3_100864853.0_100864872.0	469.577	712.555	678.616	514.797	695.628	1334.85	4.25687	726.807	0	502.282	461.374	0	560.626	11.2579	27.4639	3141.45	492.929	4.27371	3.31614	167.842	9.19583	50.6588	528.017	1269.11	4043.07	1.97042	0	0	0	0	0	0	0	0	0	0	0	0	0	0	0	0	0	0	0	0	0	0
ABI3BP	chr3_100874910.0_100874929.0	276.684	346.747	337.565	596.741	274.221	82.9961	0	569.524	0	476.666	227.474	0	575.504	68.5706	0.572165	13.9549	37.2022	0	0	13.9868	0	6.33235	132.085	0	0	0	0	0	0	0	0	0	0	0	0	0	0	0	0	0	0	0	0	0	0	0	0	0
ABI3BP	chr3_100993331.0_100993350.0	474.814	254.16	525.875	456.955	592.247	241.38	0	110.601	0	393.138	266.671	0	113.673	352.064	0	75.3565	643.342	2.84914	65.4938	97.9078	7.35666	94.9853	5695.06	21.6393	7.25865	12.8077	0	0	0	0	0	0	0	0	0	0	0	0	0	0	0	0	0	0	0	0	0	0
ACACB	chr12_109166949.0_109166968.0	549.877	527.382	705.817	911.982	778.858	676.418	4.25687	345.449	7.26671	702.749	1496.57	0	879.028	71.1292	4.57732	966.476	720.632	0	0.829035	0	2.75875	18.9971	70.3808	245.342	0	39.4084	0	0	0	0	0	0	0	0	0	0	0	0	0	0	0	0	0	0	0	0	2.95957	0
ACACB	chr12_109168010.0_109168029.0	999.379	746.141	1037.8	737.491	843.69	1788.91	4.25687	1089.49	0	1217.28	823.147	0	610.618	55.7775	1.14433	2532.61	284.789	3.20528	54.3018	153.855	12.8742	82.3206	513.876	148.551	7480.87	31.5267	0	0	0	0	0	0	0	0	0	0	0	0	0	0	0	0	0	0	0	0	0	0
ACACB	chr12_109179268.0_109179287.0	627.558	654.462	617.938	661.332	639.557	294.636	12.7706	592.506	0	307.383	774.311	0	360.657	34.2853	1.14433	142.739	354.704	1.42457	3.73066	97.9078	9719.07	50.6588	262.241	25.4408	1.67507	4.92605	0	0	0	0	0	0	0	0	0	0	0	0	0	0	0	0	0	0	0	0	0	0
ACACB	chr12_109191711.0_109191730.0	1066.59	698.032	828.567	830.039	790.247	1363.56	4.25687	889.836	0	266.176	590.532	0	288.05	164.262	1410.39	933.383	1733.43	1.42457	2.90162	97.9078	3.67833	69.6559	204.394	27.4877	2.23343	56.1569	0	0	0	0	0	0	0	0	0	0	0	0	0	0	0	0	0	0	0	0	0	0
ACACB	chr12_109232718.0_109232737.0	768.082	598.183	564.235	690.253	434.548	275.27	0	847.463	0	308.497	442.096	0	177.948	100.297	0	580.923	210.385	0.356142	0.414518	27.9737	2.75875	6.33235	585.864	6.43329	0.558357	3.94084	0	0	0	0	0	0	0	0	0	0	0	0	0	0	0	0	0	0	0	0	0	0
ACACB	chr12_109235323.0_109235342.0	586.535	413.918	496.583	605.417	544.062	392.848	4.25687	247.775	8095.12	691.612	825.075	0	194.017	309.591	15329.4	137.157	147.205	353.293	5.80325	363.658	11283.3	15862.5	96.4121	57.0224	7915.83	223.643	0	0	0	0	0	0	0	0	0	0	0	0	0	0	0	0	0	0	0	0	2.95957	0
ACADL	chr2_210195213.0_210195232.0	226.06	113.464	258.056	258.363	1028.55	209.911	0	63.9188	0	113.598	66.8285	0	186.28	149.422	1.71649	41.0673	184.728	0	0.414518	13.9868	0.919583	0	15.1046	21.3468	0.558357	0	0	0	0	0	0	0	0	0	0	0	0	0	0	0	0	0	0	0	0	0	0	0
ACADL	chr2_210205633.0_210205652.0	668.58	949.469	796.485	674.828	909.398	127.261	4.25687	938.673	0	463.302	546.194	0	971.275	185.755	0.572165	210.52	137.584	0.356142	164.978	0	3.67833	0	37.9221	239.786	0	1.97042	0	0	0	0	0	0	0	0	0	0	0	0	0	0	0	0	0	0	0	0	0	0
ACADL	chr2_210205698.0_210205717.0	507.109	270.499	417.074	317.169	350.442	237.576	0	530.742	0	369.751	588.605	0	97.6037	789.585	1.71649	36.2827	14.7526	0.356142	0	13.9868	0.919583	6.33235	194.752	9.06509	0	0	0	0	0	0	0	0	0	0	0	0	0	0	0	0	0	0	0	0	0	0	0	1.83908
ACADL	chr2_210205704.0_210205723.0	569.079	626.323	567.025	390.436	620.283	278.383	4.25687	193.193	0	488.917	208.839	0	1130.77	84.4339	1.14433	77.7487	272.602	0.356142	0	41.9605	0.919583	12.6647	639.533	150.598	1.11671	5.91126	0	0	0	0	0	0	0	0	0	0	0	0	0	0	0	0	0	0	0	0	0	0
ACADL	chr2_210217967.0_210217986.0	273.193	315.884	442.182	462.739	224.283	577.168	8.51374	8.61827	0	104.688	137.512	0	461.237	90.0628	6.29381	442.968	728.009	1.42457	1.24355	27.9737	4.59791	6.33235	11.8908	245.342	1.67507	0.985209	0	0	0	0	0	0	0	0	0	0	0	0	0	0	0	0	0	0	0	0	0	0
ACADL	chr2_210220638.0_210220657.0	1061.35	698.94	878.784	955.364	767.468	876.646	4.25687	815.863	0	2645.05	647.722	0	782.02	50.1486	552.711	3056.92	1613.81	1745.1	2.90162	111.895	8.27625	75.9882	564.975	123.987	3.9085	4.92605	0	0	0	0	0	0	0	0	0	0	0	0	0	0	0	0	0	0	0	0	0	0
ACKR1	chr1_159205440.0_159205459.0	375.313	218.759	585.856	528.294	526.539	237.23	0	1868.73	0	184.875	307.797	0	386.844	142.258	0.572165	13.9549	1.60354	1.42457	0.829035	13.9868	2.75875	18.9971	258.063	1119.39	10.6088	3.94084	0	0	0	0	0	0	0	0	0	0	0	0	0	0	0	0	0	0	0	0	0	0
ACKR1	chr1_159205527.0_159205546.0	627.558	498.335	753.243	577.46	556.327	525.988	0	376.331	0	468.87	855.919	0	204.134	135.094	1.14433	258.764	2256.83	0.356142	0.414518	13.9868	5.5175	12.6647	259.991	114.63	1.67507	17.7338	0	0	0	0	0	0	0	0	0	0	0	0	0	0	0	0	0	0	0	0	0	0
ACKR1	chr1_159205644.0_159205663.0	541.149	564.598	919.933	828.11	777.982	2216.34	4.25687	688.025	0	453.279	403.541	0	421.362	337.736	30394.5	648.703	285.751	3.56142	289.333	69.9342	2.75875	9384.54	103.161	121.94	1768.88	4338.86	0	0	0	0	0	0	0	0	0	0	0	0	0	0	0	0	0	0	0	0	0	0
ACKR1	chr1_159206021.0_159206040.0	718.331	846.897	606.779	490.696	836.681	877.338	0	953.037	0	253.925	424.746	0	272.576	14.3282	6.29381	392.731	542.318	1.06843	1.24355	13.9868	0.919583	12.6647	544.407	22.2241	1.67507	50.2457	0	0	0	0	0	0	0	0	0	0	0	0	0	0	0	0	0	0	0	0	0	0
ACKR1	chr1_159206088.0_159206107.0	367.457	113.464	163.9	197.628	106.009	77.463	0	111.319	0	159.26	28.9162	0	67.8464	0	0	58.6106	0	0	0	0	0	0	10.6053	28.0726	0	0	0	0	0	0	0	0	0	0	0	0	0	0	0	0	0	0	0	0	0	0	0	0
ACKR1	chr1_159206350.0_159206369.0	641.523	763.387	501.465	454.063	747.318	211.986	0	559.469	0	846.417	515.35	0	539.796	215.946	0.572165	273.516	32.0709	21.7247	396.693	13.9868	3.67833	18.9971	615.109	385.413	2.23343	26.6007	0	0	0	0	0	0	0	0	0	0	0	0	0	0	0	0	0	0	0	0	0	0
ACSM5	chr16_20418086.0_20418105.0	908.606	1011.19	839.029	1108.65	595.752	422.934	502.31	575.269	0	382.001	930.458	0	211.871	61.4065	20.0258	88.5139	347.328	1.78071	76.2712	41.9605	0.919583	18.9971	1225.72	35.0907	1.67507	7.88168	2.36721	0	0	0	16929.2	16.398	2.6809	22.6347	6.38027	36.4594	0	0	0	0	0	1908.98	2.7833	0	0	0	0	0
ACSM5	chr16_20418243.0_20418262.0	438.156	350.378	779.746	687.361	606.265	701.663	4.25687	630.57	0	700.521	800.657	0	787.971	23.0274	42.9124	57.4144	148.809	0	0.829035	41.9605	3.67833	0	304.019	1.46211	0.558357	1634.46	0	0	0	0	0	0	0	0	0	0	0	0	0	0	0	0	0	0	0	0	0	0
ACSM5	chr16_20418248.0_20418267.0	789.902	501.966	691.868	558.179	785.867	742.815	0	630.57	0	359.727	530.13	0	231.511	1782.83	137.892	44.257	44.2578	0.356142	0.829035	13.9868	3.67833	0	379.221	11.4045	2.23343	8.86689	0	0	0	0	0	0	0	0	0	0	0	0	0	0	0	0	0	0	0	0	0	0
ACSM5	chr16_20421318.0_20421337.0	424.191	505.597	648.626	614.094	432.796	689.213	0	408.649	0	566.877	354.062	0	204.134	40.4259	2.86082	155.099	790.868	0.712284	0.414518	13.9868	0.919583	6.33235	1.28549	16.0832	7.817	4.92605	0	4.60887	3.9495	0	9.50812	9472.55	0	0	0	0	0	0	0	0	0	0	0	0	0	0	0	0
ACSM5	chr16_20424042.0_20424061.0	566.46	249.621	545.404	340.306	457.327	414.289	8.51374	389.258	0	900.988	88.0337	0	157.713	55.2658	21.7423	40.6686	49.7098	0.356142	0.414518	13.9868	1.83917	0	29.5664	1.46211	0.558357	0.985209	0	0	0	0	0	0	0	0	0	0	0	0	0	0	0	0	0	0	0	0	0	0
ACSM5	chr16_20429747.0_20429766.0	1166.96	895.006	1106.15	828.11	982.114	642.528	4.25687	384.231	0	678.247	753.748	0	605.262	201.106	2914.04	362.03	2853.67	212.617	3563.19	153.855	7.35666	63.3235	297.592	71.6435	5.02522	25.6154	0	0	0	0	0	0	0	0	0	0	0	0	0	0	0	0	0	0	0	0	0	0
ACTG2	chr2_73901330.0_73901349.0	285.412	334.039	414.981	405.861	391.619	323.685	8.51374	125.683	0	368.637	91.8892	0	69.0367	65.5002	0	167.858	250.473	1.06843	0.414518	27.9737	0.919583	12.6647	987.26	5.84845	1.67507	32.5119	0	0	0	0	0	0	0	0	0	0	0	0	0	0	0	0	0	0	0	0	0	0
ACTG2	chr2_73902380.0_73902399.0	549.877	611.799	594.225	364.407	561.584	153.543	0	614.052	0	175.966	354.062	0	366.609	181.661	0	32.2956	71.518	0	0.414518	0	0	6.33235	0.321374	0.292422	0	0	0	0	0	0	0	0	0	0	0	0	0	0	0	0	0	0	0	0	0	0	0	0
ACTG2	chr2_73902445.0_73902464.0	546.386	530.105	653.508	495.517	617.654	741.431	4.25687	346.885	0	150.35	536.556	0	456.476	20.9805	396.51	848.458	60.9347	0.712284	0	27.9737	3.67833	0	203.751	5.55603	0.558357	10.8373	0	0	0	0	0	0	0	0	0	0	0	0	0	0	0	0	0	0	0	0	0	0
ACTG2	chr2_73908683.0_73908702.0	165.836	95.31	332.682	537.934	76.2212	268.354	0	83.3099	0	104.688	67.4711	0	61.895	42.4728	0	2.79098	30.4673	0	0	0	0.919583	0	46.5992	0.292422	0	1.97042	0	0	0	0	0	0	0	0	0	0	0	0	0	0	0	0	0	0	0	0	0	0
ACTG2	chr2_73913634.0_73913653.0	343.018	630.861	499.372	454.063	299.628	390.081	0	208.993	0	322.975	737.041	0	2945.96	1486.04	5.14948	5617.84	843.464	1.78071	0.829035	125.882	5.5175	37.9941	371.187	17.5453	4.46686	4.92605	4130.78	9.21773	3.9495	0	0	5.46598	5.3618	0	1.27605	0	0	0	0	0	0	0	0	0	0	0	0	0
ACTG2	chr2_73914782.0_73914801.0	625.812	662.631	818.106	727.85	855.079	394.923	0	463.232	0	178.193	847.565	0	319.592	169.379	38.9072	211.317	554.505	599.387	1.65807	69.9342	4.59791	18.9971	644.997	2112.17	3.9085	5.91126	0	0	0	0	0	0	0	0	0	0	0	0	0	0	0	0	0	0	0	0	0	0
ACVR1C	chr2_157538587.0_157538606.0	361.348	340.393	386.386	579.388	561.584	155.963	0	504.887	0	74.6183	197.915	0	33.9232	728.178	0.572165	25.1188	492.288	0.712284	0.414518	13.9868	0	6.33235	210.178	68.4268	0.558357	0.985209	0	0	0	0	0	0	0	0	0	0	0	0	0	0	0	0	0	0	0	0	0	0
ACVR1C	chr2_157544485.0_157544504.0	1111.97	1032.07	712.094	440.566	1354.46	526.333	0	682.998	0	359.727	902.827	0	545.152	286.563	96.6959	442.171	76.3287	1.78071	1.24355	125.882	2.75875	37.9941	877.993	645.669	3.9085	30.5415	0	0	0	0	0	0	0	0	0	0	0	0	0	0	0	0	0	0	0	0	0	0
ACVR1C	chr2_157544522.0_157544541.0	202.494	359.455	273.399	168.707	187.487	20.749	0	160.874	0	50.1168	79.0375	0	98.1988	0.511721	0	7.17681	9.30055	0	0	0	0	12.6647	17.0328	109.366	0.558357	0.985209	0	0	0	0	0	0	0	0	0	0	0	0	0	0	0	0	0	0	0	0	0	0
ACVR1C	chr2_157550241.0_157550260.0	1099.75	1110.13	886.456	804.009	936.557	212.677	21.2843	637.752	0	1112.59	750.535	0	1493.22	1096.11	9871.56	539.855	104.23	745.405	0.829035	27.9737	0.919583	12.6647	1107.77	59.6542	8.93372	73.8907	0	0	0	0	0	0	0	0	0	0	0	13.3938	2.264	1.33922	0	2.56239	0	9.6344	4251.64	0	0	0
ACVR1C	chr2_157550365.0_157550384.0	288.904	363.993	442.182	291.14	311.017	258.325	4.25687	915.691	0	278.427	224.904	0	316.617	1.53516	3.43299	160.681	658.415	0	1.65807	69.9342	1.83917	12.6647	1097.49	124.28	0.558357	34.4823	0	0	0	8.66373	0	0	0	0	2150.15	6.07657	0	0	0	0	0	0	0	0	0	0	0	0
ACVR1C	chr2_157556207.0_157556226.0	659.852	853.251	809.736	1019.95	656.203	1024.31	4.25687	349.04	0	4158.58	838.569	0	382.083	228.227	1.14433	290.262	693.372	8138.2	4.14518	167.842	11.035	75.9882	45.6351	192.706	7.25865	11.8225	0	0	0	0	0	0	0	0	0	0	0	0	0	0	0	0	0	0	0	0	0	0
ADAM33	chr20_3668950.0_3668969.0	590.027	461.119	600.502	582.28	721.035	379.015	4.25687	229.82	0	502.282	652.22	0	170.211	329.548	0	331.728	449.634	0	0.414518	0	1.83917	25.3294	364.438	19.0075	1.67507	10.8373	0	0	0	0	9.50812	5.46598	2.6809	0	0	11053.3	0	0	0	0	0	0	0	0	0	0	0	0
ADAM33	chr20_3671278.0_3671297.0	514.091	629.046	440.787	639.159	403.885	325.068	12.7706	499.141	0	1297.47	544.909	0	655.849	179.102	1.71649	64.99	558.995	0.712284	1.24355	0	2.75875	6.33235	8.67709	33.0437	0.558357	0	0	0	0	0	0	0	0	0	0	0	0	0	0	0	0	0	0	0	0	0	0	0
ADAM33	chr20_3672209.0_3672228.0	1088.41	1114.67	1378.85	1254.22	1404.4	1772.31	4.25687	823.044	0	465.529	1408.54	0	1110.54	455.943	5563.16	1666.61	568.937	267.107	577.838	195.816	7.35666	56.9912	453.78	284.235	1.11671	2613.76	0	0	0	0	0	0	0	0	0	0	0	0	0	0	0	0	0	0	0	0	0	0
ADAM33	chr20_3673582.0_3673601.0	482.67	824.204	506.347	487.804	615.902	182.591	4.25687	335.394	0	277.313	877.766	0	105.341	1.02344	14.8763	92.1023	41.0507	0	0.829035	0	0	0	17.6755	164.634	0	22.6598	0	0	0	0	0	0	0	0	0	0	0	0	0	0	0	0	0	0	0	0	0	0
ADAM33	chr20_3674594.0_3674613.0	1049.13	619.061	683.498	624.698	396	1442.06	0	74.6916	0	265.062	988.29	0	690.367	82.387	5.14948	2785	8428.87	105.774	42.2808	139.868	9.19583	88.6529	395.932	50.5891	2.23343	21.6746	0	0	0	0	0	0	0	0	0	0	0	0	0	0	0	0	0	0	0	0	0	0
ADAM33	chr20_3675072.0_3675091.0	284.539	619.969	474.264	400.077	495.876	90.604	8.51374	323.903	0	412.071	213.337	0	107.126	0.511721	0.572165	27.9098	175.107	0.356142	0.414518	13.9868	0	6.33235	26.3526	33.0437	0	10.8373	0	0	0	0	0	0	0	0	0	0	0	0	0	0	0	0	0	0	0	0	0	0
ADAMTS5	chr21_26924388.0_26924407.0	1265.59	1397.88	1089.41	1329.41	1031.18	1404.02	21.2843	2311.85	0	4608.52	873.268	0	360.062	432.404	66.9433	494.003	1066.36	2074.88	1.24355	41.9605	3.67833	12.6647	40.8144	368.745	3.35014	16.7486	0	0	0	0	0	0	0	0	0	0	0	0	0	0	0	0	0	0	0	0	0	0
ADAMTS5	chr21_26934530.0_26934549.0	885.913	878.667	889.245	749.059	1175.73	1737.38	4.25687	1055.74	0	594.719	828.288	0	996.867	4.09376	20.0258	1214.47	467.593	228.287	1.65807	83.921	2.75875	44.3265	1235.36	72.5208	2.79179	5.91126	0	0	0	0	0	0	0	0	0	0	0	0	0	0	0	0	0	0	0	0	0	0
ADAMTS5	chr21_26954776.0_26954795.0	428.555	708.017	601.897	693.145	700.884	461.32	4.25687	573.115	0	240.561	554.548	0	346.374	1071.54	4.00515	108.848	757.514	8.54741	20179.5	363.658	25.7483	164.641	474.99	114.045	15.0757	34.4823	0	0	0	0	0	0	0	0	0	0	0	0	0	0	0	0	0	0	0	0	0	0
ADAMTS5	chr21_26965804.0_26965823.0	663.344	224.205	587.948	561.071	622.911	911.228	8.51374	295.176	0	294.018	158.718	0	717.149	180.637	9.15464	570.955	104.872	5.69827	1726.88	209.803	21.1504	107.65	39.529	7869.67	15.634	117.24	0	0	0	0	0	0	0	0	0	0	0	0	0	0	0	0	0	0	0	0	0	0
ADAMTS5	chr21_26965985.0_26966004.0	1070.95	786.988	922.723	790.513	830.548	567.831	8.51374	894.145	0	490.031	597.601	0	420.767	2.04688	8.01031	60.2054	178.635	507.146	0.414518	41.9605	1.83917	6.33235	91.2701	151.767	2.23343	0.985209	0	0	0	0	0	0	0	0	0	0	0	0	0	0	0	0	0	0	0	0	0	0
ADAMTS5	chr21_26966146.0_26966165.0	384.914	282.299	283.861	344.162	198.876	454.749	0	252.084	0	1824.25	314.865	0	502.302	24.5626	1.14433	98.8804	2179.54	2.49299	0.414518	27.9737	2.75875	12.6647	8.99846	1.16969	1.11671	1.97042	0	0	0	0	0	0	0	0	0	0	0	0	0	0	0	0	0	0	0	0	0	0
ADAMTS7	chr15_78762535.0_78762554.0	434.665	177.912	610.266	797.261	449.442	494.172	0	276.503	0	312.952	289.804	0	164.26	158.633	25.7474	190.584	101.023	102.213	0.414518	13.9868	1.83917	6.33235	37.2793	57.0224	1.11671	0	0	0	0	0	0	0	0	0	0	0	0	0	0	0	0	0	0	0	0	0	0	0
ADAMTS7	chr15_78766673.0_78766692.0	550.75	825.112	1447.2	1375.69	873.477	958.95	689.613	244.902	7.26671	259.494	668.927	96.2182	455.285	1655.93	156020	246.404	307.88	844.769	59.6905	657.381	12247	167332	125.014	37.1376	24922.3	9371.31	0	0	0	4.33187	4.75406	0	2.6809	0	3.82816	12.1531	0	31247.7	2.264	1.33922	0.934958	0	2.7833	4.8172	2.61318	2.64664	0	1.83908
ADAMTS7	chr15_78777512.0_78777531.0	719.204	284.114	705.817	736.527	515.15	1020.85	4.25687	407.931	0	1015.7	158.075	0	217.228	881.183	6.29381	697.745	694.976	2.13685	78.3438	83.921	5.5175	18.9971	124.693	4.97118	1.11671	3924.09	0	0	0	0	0	0	0	0	0	0	0	0	0	0	0	0	0	0	0	0	0	0
ADAMTS7	chr15_78788235.0_78788254.0	301.123	186.989	503.557	438.638	282.982	151.814	0	704.543	0	330.771	154.22	0	91.6522	34.2853	0	209.323	27.9017	0.712284	0	41.9605	0.919583	0	2.57099	37.1376	0.558357	643.342	0	0	0	0	0	0	0	0	0	0	0	0	0	0	0	0	0	0	0	0	0	0
ADAMTS7	chr15_78790715.0_78790734.0	300.25	251.437	295.718	340.306	399.504	188.124	0	244.902	0	357.5	744.109	0	150.571	157.098	1.14433	203.343	13.1491	0.712284	0	0	113.109	12.6647	33.1015	8.18783	0	0	0	0	0	0	0	0	0	0	0	0	0	0	0	0	0	0	0	0	0	0	0	0
ADAMTS7	chr15_78800387.0_78800406.0	261.846	194.251	347.329	456.955	598.38	510.08	8.51374	433.786	16655.3	897.647	219.12	0	101.77	976.363	2.86082	257.169	30.4673	1.78071	1.24355	13.9868	2.75875	31.6618	86.4495	1038.39	1.11671	3.94084	1254.62	0	1.97475	0	14.2622	6324.14	5.3618	0	3.82816	0	0.900405	13.3938	9.05599	2.67844	0.934958	0	0	0	7089.55	4549.57	5022.39	1.83908
ADCY5	chr3_123291328.0_123291347.0	135.287	58.0937	318.036	242.938	166.46	220.631	4.25687	114.192	0	126.963	62.973	0	41.065	3113.82	0.572165	5.58196	203.009	0.356142	0	0	0.919583	12.6647	348.369	51.4663	5.58357	13.7929	0	0	0	0	0	0	0	0	0	0	0	0	0	0	0	0	0	0	0	0	0	0
ADCY5	chr3_123314223.0_123314242.0	223.442	166.112	189.008	227.513	125.283	391.119	0	51.7096	0	237.219	182.493	0	2.38058	0	0.572165	37.0802	33.6744	0	0.414518	0	0.919583	6.33235	1.28549	0.292422	0.558357	0	0	0	0	0	0	0	0	0	0	0	0	0	0	0	0	0	0	0	0	0	0	0
ADCY5	chr3_123328733.0_123328752.0	855.364	694.401	709.304	839.679	709.645	762.18	8.51374	395.004	0	749.524	856.561	0	82.725	144.817	0.572165	368.808	132.453	471.888	0.414518	13.9868	4.59791	12.6647	100.59	64.0405	2.23343	22.6598	0	0	0	0	0	0	0	0	0	0	0	0	0	0	0	0	0	0	0	0	0	0
ADCY5	chr3_123347830.0_123347849.0	484.415	319.515	608.872	666.152	509.017	932.668	4.25687	601.124	0	261.721	438.883	0	196.993	1396.49	2.28866	141.941	960.523	0.712284	0.414518	13.9868	0.919583	25.3294	88.3777	199.432	1.67507	1.97042	0	0	0	0	0	0	0	0	0	0	0	0	0	0	0	0	0	0	0	0	0	0
ADCY5	chr3_123447860.0_123447879.0	939.155	689.863	663.97	665.188	374.973	182.591	4.25687	432.35	0	504.509	435.67	0	138.073	30.1915	0	28.3085	51.3134	257.847	0	0	0	6.33235	167.757	14.0363	0	9.85209	0	0	0	0	0	0	0	0	0	0	0	0	0	0	0	0	0	0	0	0	0	0
ADCY5	chr3_123448294.0_123448313.0	927.808	844.174	701.632	810.758	862.964	1121.48	0	392.131	0	741.728	580.251	0	308.285	416.541	0	184.603	140.15	2.49299	2.07259	167.842	10.1154	18.9971	78.4152	16.6681	2.79179	7806.8	0	0	0	0	0	0	0	0	0	0	0	0	0	0	0	0	0	0	0	0	0	0
ADCYAP1R1	chr7_31078003.0_31078022.0	603.119	789.711	608.174	780.873	629.044	761.143	0	759.844	0	210.491	774.953	0	415.411	24.5626	106.423	216.899	94.6091	0.712284	507.37	27.9737	1.83917	6.33235	686.775	24.8559	1.67507	6.89647	0	0	0	0	0	0	0	0	0	0	0	0	0	0	0	0	0	0	0	0	0	0
ADCYAP1R1	chr7_31078077.0_31078096.0	373.567	492.889	805.552	579.388	930.424	160.113	0	676.534	0	379.774	1699.63	0	346.969	2816	398.227	196.166	180.238	0	0	0	0	0	28.2809	48.8345	0	32.5119	0	0	0	0	0	0	0	0	1.27605	6.07657	0	0	0	0	0	0	0	0	0	0	0	0
ADCYAP1R1	chr7_31084151.0_31084170.0	658.107	222.39	580.276	662.296	543.185	257.634	4.25687	954.473	0	507.85	258.318	0	170.806	160.169	17437.3	177.028	97.1747	14.2457	49.7421	559.473	28.5071	15495.3	119.872	232.183	1441.68	43765	0	0	0	0	0	0	0	0	0	0	0	0	0	0	0	0	0	0	0	0	0	0
ADCYAP1R1	chr7_31084223.0_31084242.0	535.039	686.232	517.506	386.58	536.177	113.428	4.25687	428.041	0	647.063	988.933	0	283.289	748.135	250.036	93.2985	51.9548	1.06843	974.946	41.9605	2.75875	6.33235	178.041	52.3436	5.58357	8.86689	0	0	0	0	0	0	0	0	0	0	0	0	0	0	0	0	0	0	0	0	0	0
ADCYAP1R1	chr7_31086415.0_31086434.0	274.938	668.077	565.63	425.142	531.796	421.897	4.25687	807.244	0	1465.64	213.337	0	131.527	24.0509	16.5928	224.076	74.0837	22.437	37238.6	699.342	49.6575	265.959	44.0282	138.316	20.1009	52.2161	2.36721	0	0	0	0	0	5.3618	0	2273.93	6.07657	0	0	0	0	0	0	0	0	0	0	0	0
ADCYAP1R1	chr7_31087641.0_31087660.0	562.096	558.244	1034.31	1084.55	620.283	1196.53	0	155.847	0	319.634	275.025	0	388.629	253.302	632.814	258.365	103.91	130.704	25.7001	475.552	15119.8	253.294	97.6976	14863.5	7038.65	141.87	0	0	0	0	0	0	0	0	0	0	0	0	0	0	0	0	0	0	0	0	0	0
ADGRG4	chrX_136346315.0_136346334.0	501.872	455.672	557.958	852.211	1039.94	585.468	4.25687	295.894	0	106.916	141.368	0	211.276	52.1955	0	199.356	189.86	0.712284	0.829035	13.9868	1.83917	6.33235	117.301	5.2636	884.438	7.88168	0	0	0	0	0	0	0	0	0	0	0	0	0	0	0	0	0	0	0	0	0	0
ADGRG4	chrX_136347100.0_136347119.0	212.095	261.422	290.836	126.289	362.708	93.3706	4.25687	20.8275	0	668.224	174.14	0	107.126	9.21097	0	65.3887	569.899	160.264	0.829035	55.9473	0	11050	60.0969	38.8922	2.23343	2165.49	0	0	0	0	0	0	0	0	0	0	0	0	0	0	0	0	0	0	0	0	0	0
ADGRG4	chrX_136347460.0_136347479.0	809.977	569.137	643.046	419.357	699.132	595.497	0	211.866	0	1003.45	303.941	0	324.949	67.5471	2381.35	271.522	132.132	0.712284	2.90162	27.9737	7.35666	31.6618	537.015	33.6286	1.67507	2959.57	0	0	0	0	0	0	0	0	0	0	0	0	0	0	0	0	0	0	0	0	0	0
ADGRG4	chrX_136347572.0_136347591.0	212.968	241.452	585.856	480.092	417.902	718.953	4.25687	389.977	0	599.174	442.739	0	220.203	8.69925	16.0206	316.178	1584.62	0.356142	0.829035	27.9737	2.75875	18.9971	26.674	61.1163	0.558357	0.985209	0	0	0	0	0	0	0	0	0	0	0	0	0	0	0	0	0	0	0	0	0	0
ADGRG4	chrX_136349479.0_136349498.0	808.232	858.697	633.98	520.582	751.699	226.164	8.51374	907.791	0	294.018	569.327	0	236.867	36.3322	0	429.412	72.4802	8.19127	0	13.9868	0.919583	6.33235	135.941	21.0544	0	0	0	0	0	0	0	0	0	0	0	0	0	0	0	0	0	0	0	0	0	0	0	0
ADGRG4	chrX_136349763.0_136349782.0	203.367	237.821	368.252	274.751	589.619	77.463	4.25687	216.893	0	22.2741	345.066	0	48.2067	756.323	0.572165	24.3214	16.3561	9.97198	1.65807	181.829	15.6329	145.644	36.958	7530.75	1341.73	74.8759	0	0	0	0	0	0	0	0	0	0	0	0	0	0	0	0	0	0	0	0	2.95957	0
ADGRL3	chr4_61587401.0_61587420.0	549.004	269.591	547.496	466.595	522.159	305.702	17.0275	1453.61	0	47.8894	3606.81	0	267.22	39.4025	0	197.362	522.755	0.712284	13.6791	0	2.75875	18.9971	194.11	110.243	1.11671	4.92605	0	0	0	0	0	0	0	0	0	0	0	0	0	0	0	0	0	0	0	0	0	0
ADGRL3	chr4_61733116.0_61733135.0	440.774	1120.12	442.879	487.804	658.831	827.194	12.7706	741.889	0	334.112	270.527	0	119.624	148.399	0.572165	143.137	121.549	1.42457	37.3066	13.9868	1.83917	31.6618	87.0922	258.794	1.11671	1.97042	0	0	0	0	0	0	0	0	0	0	0	0	0	0	0	0	0	0	0	0	0	0
ADGRL3	chr4_61733133.0_61733152.0	446.884	390.317	350.816	555.287	364.46	192.62	0	313.13	0	1217.28	318.72	0	105.341	0	0	137.555	11.8662	0.356142	0	0	0	0	54.6335	11.4045	0	0	0	0	0	0	0	0	0	0	0	0	0	0	0	0	0	0	0	0	0	0	0	0
ADGRL3	chr4_61892706.0_61892725.0	384.041	297.73	603.989	448.279	418.778	160.805	0	184.575	0	429.891	684.992	0	212.466	25.0743	14.3041	330.532	41.0507	9572.03	15933.6	741.302	34.9442	151.976	101.875	832.234	21.2176	55.1717	0	0	0	0	0	0	0	0	0	0	0	0	0	0	0	0	0	0	0	0	0	0
ADGRL3	chr4_61948160.0_61948179.0	979.305	848.712	802.762	825.218	918.159	453.02	12.7706	1831.38	0	1094.77	1116.81	0	615.379	50.6603	1961.38	465.695	536.546	1.42457	77.5148	0	2.75875	25.3294	113.766	908.556	12.8422	170.441	0	0	0	0	0	0	0	0	0	0	0	0	0	0	0	0	0	0	0	0	0	0
ADGRL3	chr4_62044528.0_62044547.0	537.657	549.167	578.881	462.739	673.725	1045.06	4.25687	95.5191	0	162.601	337.998	0	464.212	263.024	1780.58	111.24	269.716	5.34213	628.409	251.763	9.19583	88.6529	587.15	66.9647	9101.23	4930.97	0	0	0	0	0	0	0	0	0	0	0	0	0	0	0	0	0	0	0	0	0	0
ADH1A	chr4_99284453.0_99284472.0	548.131	244.175	396.15	236.19	364.46	57.0598	4.25687	265.73	0	1051.34	181.851	0	266.029	650.909	36.6186	14.3536	18.6011	1.78071	2.48711	0	1.83917	31.6618	80.6648	1662.71	462.878	0.985209	0	0	0	0	0	0	0	0	0	0	0	0	0	0	0	0	0	0	0	0	0	0
ADH1A	chr4_99284602.0_99284621.0	649.378	1228.14	465.197	334.522	534.424	368.295	4.25687	135.02	0	478.894	384.906	0	232.106	1499.85	793.02	354.853	687.92	7.83513	6.63228	153.855	6.43708	126.647	111.195	8270	909.006	195.071	2.36721	0	0	0	0	0	0	0	0	0	5422.24	53.5752	4.528	1.33922	1.86992	10.2496	5.56661	24.086	0	0	0	0
ADH1A	chr4_99284768.0_99284787.0	446.011	538.274	642.349	686.397	570.345	1104.19	0	68.2279	0	1168.28	945.237	0	633.829	16.8868	4.00515	244.41	199.481	0.356142	0.829035	41.9605	1.83917	12.6647	121.479	228.089	0	1.97042	0	0	0	0	0	0	0	0	0	0	0	0	0	0	0	0	0	0	0	0	0	0
ADH1A	chr4_99286908.0_99286927.0	608.356	592.737	1058.03	1152.03	1169.6	955.492	4.25687	502.732	0	987.858	427.317	0	635.019	112.067	107.567	581.321	151.054	172.017	1.65807	27.9737	4.59791	25.3294	892.776	45.3255	1.11671	0.985209	0	0	0	0	0	0	0	0	0	0	0	0	0	0	0	0	0	0	0	0	0	0
ADH1A	chr4_99286934.0_99286953.0	1374.69	1357.94	928.302	940.903	914.654	1693.81	4.25687	782.826	0	1308.61	1067.33	0	5280.71	398.119	113.289	411.071	495.495	0.712284	0.414518	0	2.75875	12.6647	117.944	289.206	1.11671	24.6302	0	0	0	0	0	0	0	0	0	0	0	0	0	0	0	0	0	0	0	0	0	0
ADH1A	chr4_99286951.0_99286970.0	1641.78	1570.34	1390.71	1026.7	1293.13	2965.38	21.2843	577.424	0	1252.92	862.344	0	861.174	12947	27029.1	5138.19	991.311	9.61584	9.94842	433.592	8058.31	196.303	160.365	59.6542	23765.4	234.48	0	0	0	0	0	0	0	0	0	0	2765.14	26.7876	0	0	1.86992	10.2496	0	0	6679.28	2.64664	0	0
ADH1B	chr4_99313984.0_99314003.0	617.957	801.511	507.044	510.941	445.062	173.6	0	355.504	0	551.285	553.263	0	144.025	478.97	3166.36	86.1217	71.1973	2.49299	3791.59	41.9605	3.67833	31.6618	77.1297	1286.95	1414.88	53.2013	0	0	0	0	0	0	0	0	0	0	0	0	0	0	0	0	0	0	0	0	0	0
ADH1B	chr4_99315899.0_99315918.0	1420.08	1401.51	1001.53	1094.19	992.628	2058.99	21.2843	655.706	0	1209.49	1148.29	0	565.387	222.087	32.0412	4652.16	551.619	200.508	31.0888	377.645	28.5071	183.638	2184.05	809.425	8363.08	7739.81	9.46884	18.4355	9.87376	28053.2	38.0325	27.3299	9820.13	13.5808	6.38027	18.2297	0	0	0	0	0	0	0	0	0	0	0	0
ADH1B	chr4_99315928.0_99315947.0	981.923	541.905	851.583	763.52	690.371	983.849	4.25687	352.631	0	485.576	1015.28	0	686.201	849.456	0.572165	500.383	1636.58	1.78071	0.829035	55.9473	1.83917	18.9971	94.4838	106.442	2.23343	4305.37	0	0	0	0	0	0	0	0	0	0	0	0	0	0	0	0	0	0	0	0	0	0
ADH1B	chr4_99316010.0_99316029.0	125.686	257.791	309.667	342.234	427.539	155.618	4.25687	305.23	0	116.939	660.574	0	157.713	11.2579	0.572165	114.829	32.7123	118.951	0.414518	13.9868	0.919583	0	42.7427	3.80149	0	7.88168	0	0	0	0	0	0	0	0	0	0	0	0	0	0	0	0	0	0	0	0	0	0
ADH1B	chr4_99318130.0_99318149.0	1228.06	1513.16	1290.98	1141.42	1572.61	1230.42	8.51374	1291.3	0	1643.83	1387.33	0	662.991	1714.26	103.562	1215.27	1963.38	131.06	4.14518	125.882	13.7937	37.9941	1822.51	694.796	10.6088	1648.26	1889.03	0	0	8.66373	0	0	0	0	3.82816	0	0	0	0	0	0	0	0	0	0	0	0	0
ADH1B	chr4_99318147.0_99318166.0	1776.19	2067.77	1675.97	1469.2	2297.15	3206.76	4.25687	1076.57	0	1336.45	1054.48	0	1049.83	270.188	10.8711	3763.44	2441.23	3709.22	639.186	209.803	10.1154	82.3206	1598.51	206.45	7.817	1983.23	2132.86	0	3.9495	12870	4.75406	0	0	4.52694	2.55211	0	0	0	0	0	0	0	0	0	0	0	0	0
ADH1C	chr4_99342955.0_99342974.0	913.843	596.368	539.824	562.035	636.929	317.114	8.51374	317.439	0	475.553	218.478	0	317.807	2221.38	1.71649	172.243	381.643	2551.76	1.65807	27.9737	2.75875	18.9971	20.5679	27.1953	1.11671	1187.18	0	0	0	0	0	0	0	0	0	0	0	0	0	0	0	0	0	0	0	0	0	0
ADH1C	chr4_99343046.0_99343065.0	393.642	213.313	373.134	208.233	413.522	183.283	4.25687	1167.78	0	329.657	385.549	0	102.96	784.979	0.572165	147.523	3436.07	2.84914	1.24355	97.9078	7.35666	37.9941	18.961	1577.91	3.35014	15.7634	0	0	0	0	0	0	0	0	0	0	0	0	0	0	0	0	0	0	0	0	0	0
ADH1C	chr4_99344974.0_99344993.0	361.348	285.022	163.9	153.282	212.018	133.485	4.25687	345.449	0	260.607	152.934	0	15.4737	39.9142	0	176.23	0	0	0	0	0.919583	0	104.768	1.46211	0.558357	0	0	0	0	0	0	0	0	0	0	0	0	0	0	0	0	0	0	0	0	0	0	0
ADH1C	chr4_99344993.0_99345012.0	174.564	102.572	195.285	135.93	265.46	86.4542	0	25.1366	0	348.59	28.9162	0	201.159	0	1.71649	90.9062	6.73488	0	236.275	13.9868	0	0	259.348	7.89541	0.558357	2.95563	0	0	0	0	0	0	0	0	0	0	0	0	0	0	0	0	0	0	0	0	0	0
ADH1C	chr4_99345012.0_99345031.0	1148.63	1288.95	820.896	548.539	746.442	564.027	8.51374	1056.46	0	1059.13	1134.8	0	324.949	99.7855	4.57732	159.086	102.627	2.84914	2.07259	27.9737	4.59791	44.3265	321.695	509.4	2134.04	10.8373	0	0	0	0	0	0	0	0	0	0	0	0	0	0	0	0	0	0	0	0	0	0
ADH1C	chr4_99347767.0_99347786.0	726.187	545.536	765.1	582.28	480.106	392.502	4.25687	677.97	0	257.266	358.561	0	336.256	48.6134	0.572165	257.568	688.241	0	1.24355	0	2.75875	18.9971	137.869	8.48025	1.11671	2.95563	0	0	0	0	0	0	0	0	0	0	0	0	0	0	0	0	0	0	0	0	0	0
ADH4	chr4_99131687.0_99131706.0	136.16	167.927	428.233	194.736	502.885	262.475	4.25687	138.61	0	466.643	458.161	0	885.575	1.53516	4.00515	14.3536	292.486	0	0.414518	13.9868	0	0	7.39159	114.922	0.558357	2.95563	0	0	0	0	0	0	0	0	0	0	0	0	0	0	0	0	0	0	0	0	0	0
ADH4	chr4_99131738.0_99131757.0	1163.47	1226.32	683.498	762.556	544.062	1023.27	4.25687	1065.07	0	1086.98	741.539	0	278.527	238.973	108.711	116.822	246.304	1.42457	0.414518	27.9737	1.83917	12.6647	147.189	7.31056	1.11671	3.94084	0	0	0	0	0	0	0	0	0	0	0	0	0	0	0	0	0	0	0	0	0	0
ADH4	chr4_99136578.0_99136597.0	481.797	369.44	308.272	344.162	366.212	300.515	0	1072.26	0	151.464	83.5356	0	271.386	0	9.15464	67.7809	70.2352	0	0	0	0.919583	6.33235	19.9252	209.082	0.558357	0	0	0	0	0	0	0	0	0	0	0	0	0	0	0	0	0	0	0	0	0	0	0
ADH4	chr4_99139067.0_99139086.0	584.79	1203.63	820.896	746.167	1040.81	384.203	4.25687	1332.96	0	865.35	2026.06	0	1725.32	624.811	10.299	285.477	1137.55	415.262	2.90162	209.803	365.074	88.6529	845.855	6253.16	4634.37	117.24	0	0	0	0	0	0	0	0	0	0	0	0	0	0	0	0	0	0	0	0	0	0
ADH4	chr4_99141629.0_99141648.0	109.975	273.222	147.161	117.613	150.69	33.8901	0	57.4551	0	326.316	238.398	0	15.4737	13.8165	0.572165	1.99356	19.5632	0	0	0	0	0	0.321374	0	0	0	0	0	0	0	0	0	0	0	0	0	0	0	0	0	0	0	0	0	0	0	0	0
ADH4	chr4_99142716.0_99142735.0	260.973	154.311	195.285	265.111	98.1238	71.2383	4.25687	15.082	0	325.202	257.675	0	363.038	0	0	0	108.4	54.4897	0	0	0	0	0.321374	0	0	0.985209	0	0	0	0	0	0	0	0	0	0	0	0	0	0	0	0	0	0	0	0	0	0
ADIPOQ	chr3_186853113.0_186853132.0	986.287	685.324	766.495	675.792	1532.31	1230.07	0	943.7	0	383.115	826.36	0	842.129	752.229	3006.15	1540.62	1348.26	1.06843	1.24355	55.9473	4.59791	56.9912	188.004	1591.07	11.7255	24.6302	0	0	0	0	0	0	0	0	0	0	0	0	0	0	0	0	0	0	0	0	0	0
ADIPOQ	chr3_186854189.0_186854208.0	487.907	529.197	569.815	416.465	454.699	810.941	0	88.3372	0	306.269	453.663	0	383.868	356.157	12.0155	119.215	316.219	0.712284	0.414518	13.9868	1.83917	6.33235	143.975	49.127	0	14.7781	0	0	0	0	0	0	0	0	0	0	0	0	0	0	0	0	0	0	0	0	0	0
ADIPOQ	chr3_186854242.0_186854261.0	587.408	808.773	692.565	440.566	926.044	48.7602	4.25687	1265.45	0	569.104	693.988	0	421.362	757.346	18.3093	68.1797	356.949	446.246	1.24355	0	2.75875	6.33235	260.955	70.7662	0.558357	18.719	0	0	0	0	0	0	0	0	0	0	0	0	0	0	0	0	0	0	0	0	0	0
ADIPOQ	chr3_186854300.0_186854319.0	830.052	836.912	926.21	759.664	902.389	1231.8	4.25687	604.715	0	308.497	905.397	0	442.787	113.09	104.706	326.146	780.605	8.19127	10.3629	97.9078	1.83917	37.9941	838.464	798.606	3012.9	31.5267	0	0	0	0	0	0	0	0	0	0	0	0	0	0	0	0	0	0	0	0	0	0
ADIPOQ	chr3_186854381.0_186854400.0	242.644	453.857	234.342	255.471	134.044	130.027	0	36.6276	0	468.87	197.915	0	94.6279	0.511721	0	120.012	18.2804	1.06843	463.016	0	0.919583	6.33235	101.554	0	1.11671	0.985209	0	0	0	0	0	0	0	0	0	0	0	0	0	0	0	0	0	0	0	0	0	0
ADIPOQ	chr3_186854408.0_186854427.0	766.336	582.752	710.699	664.224	731.548	218.21	17.0275	1586.48	0	1485.68	645.152	0	355.896	2755.1	1.14433	1041.83	629.551	159.552	1.24355	55.9473	4.59791	37.9941	487.845	66.0875	9.49208	1.97042	0	0	0	0	0	0	0	0	0	0	0	0	0	0	0	0	0	0	0	0	0	0
ADRA1A	chr8_26864192.0_26864211.0	1733.42	1699.24	1286.79	1408.46	1491.13	1608.74	4.25687	909.945	0	4198.67	1492.07	0	793.922	629.416	13.732	2532.61	1621.82	9261.83	63.8357	475.552	18.3917	88.6529	2896.54	511.447	6.14193	1553.68	0	0	0	4.33187	9.50812	5.46598	0	0	0	0	0	13.3938	6.79199	1.33922	3868.85	0	2.7833	9.6344	10.4527	0	0	0
ADRA1A	chr8_26864290.0_26864309.0	486.161	550.075	737.202	849.319	712.274	892.553	0	733.271	0	946.65	770.455	0	255.912	282.981	316.979	1150.68	4134.9	3963.51	4.55969	153.855	7.35666	69.6559	1480.57	60.239	6.70029	47.2901	0	0	0	0	0	0	0	0	0	0	0	0	0	0	0	0	0	0	0	0	0	0
ADRA1A	chr8_26864333.0_26864352.0	1030.8	1539.48	1025.95	896.557	1145.95	2181.07	12.7706	1599.41	0	960.015	633.585	0	590.978	2296.09	18949	4392.6	2315.52	6.41056	7.87584	251.763	16.5525	126.647	2907.47	354.708	5485.86	2632.48	0	0	0	0	0	0	0	0	0	0	0	0	0	0	0	0	0	0	0	0	0	0
ADRA1A	chr8_26864341.0_26864360.0	748.88	589.106	758.125	591.921	936.557	1204.83	4.25687	1418.42	0	1075.84	458.803	0	2363.32	511.721	501.789	889.525	8923.4	4.98599	8.29035	223.789	19.3112	45561.3	887.634	1035.76	5382.57	2364.5	0	0	0	0	0	0	0	0	0	0	0	0	0	0	0	0	0	0	0	0	0	0
ADRA1A	chr8_26864487.0_26864506.0	693.019	598.183	700.935	429.962	601.008	428.121	4.25687	1022.7	0	1143.78	722.904	0	437.431	451.338	2.86082	415.059	225.779	1.42457	0.414518	41.9605	1.83917	31.6618	528.017	796.266	6.14193	2.95563	0	0	0	0	0	0	0	0	0	0	0	0	0	0	0	0	0	0	0	0	0	0
ADRA1A	chr8_26864670.0_26864689.0	778.556	1090.16	524.48	596.741	748.194	314.693	8.51374	1618.8	0	926.604	518.563	0	113.673	0.511721	0	119.215	231.231	901.396	0	13.9868	2.75875	6.33235	262.884	5.84845	0.558357	9.85209	0	0	0	0	0	0	0	0	0	0	0	0	0	0	0	0	0	0	0	0	0	0
ADRB2	chr5_148826896.0_148826915.0	521.947	818.758	739.992	893.665	1217.79	6530.75	0	262.857	0	392.025	852.706	0	551.104	64.4768	2.86082	2442.11	782.209	1.42457	614.315	83.921	7.35666	69.6559	72.3091	295.347	1.67507	43.3492	0	0	0	0	0	0	0	0	0	0	0	0	0	0	0	0	0	0	0	0	0	0
ADRB2	chr5_148827060.0_148827079.0	783.793	513.766	467.987	573.604	601.008	1099.7	8.51374	257.112	0	1375.43	750.535	0	1220.64	254.837	3.43299	161.478	86.5914	245.026	0.414518	13.9868	2.75875	12.6647	10.9267	0.584845	1.11671	1053.19	0	0	0	0	0	0	0	0	0	0	0	0	0	0	0	0	0	0	0	0	0	0
ADRB2	chr5_148827201.0_148827220.0	741.897	808.773	974.334	845.463	794.628	2705.33	12.7706	711.007	0	640.381	336.713	0	285.669	74.1995	0.572165	738.812	495.816	6.7667	3.31614	349.671	17.4721	113.982	1314.1	105.857	11.1671	16923.9	0	0	0	0	323.276	0	2.6809	0	0	0	0	0	0	0	0	0	0	0	0	0	0	0
ADRB2	chr5_148827444.0_148827463.0	507.109	235.098	336.17	366.335	320.655	432.271	0	146.511	0	197.126	375.91	0	208.896	157.61	0	103.266	35.5987	0.712284	0.414518	0	0	6.33235	22.1748	31.2892	0	0	0	0	0	0	0	0	0	0	0	0	0	0	0	0	0	0	0	0	0	0	0	0
ADRB2	chr5_148827464.0_148827483.0	260.973	405.748	504.952	424.178	630.796	850.71	0	194.629	0	287.336	282.093	0	151.167	0.511721	0.572165	83.7294	470.8	67.3109	1.24355	13.9868	2.75875	6.33235	225.926	244.173	0.558357	1.97042	0	0	0	0	0	0	0	0	0	0	0	0	0	0	0	0	0	0	0	0	0	0
ADRB2	chr5_148827801.0_148827820.0	1002	1046.59	713.489	731.706	912.026	97.1746	29.7981	1369.59	0	613.652	671.498	0	257.102	20.4688	5.14948	28.7072	15.394	1.06843	0	83.921	1.83917	12.6647	261.598	1568.26	15.0757	25.6154	0	0	0	0	0	0	0	0	0	0	0	0	0	0	0	0	0	0	0	0	0	0
AFP	chr4_73438193.0_73438212.0	715.713	823.296	473.567	381.76	599.256	102.362	0	533.614	0	227.196	911.181	0	94.6279	101.321	1.14433	35.884	17.3183	207.275	0	27.9737	0	0	11.8908	14.0363	0	0	0	0	0	0	0	0	0	0	0	0	0	0	0	0	0	0	0	0	0	0	0	0
AFP	chr4_73442326.0_73442345.0	520.201	309.53	496.583	475.272	384.61	382.128	4.25687	196.784	0	485.576	661.859	0	79.1542	3.58204	1088.26	29.5046	41.6921	0.712284	1.24355	55.9473	5.5175	31.6618	11.5694	44.7406	1.67507	3519.17	0	0	0	0	0	0	0	0	0	0	0	0	0	0	0	0	2087.48	4.8172	0	0	0	0
AFP	chr4_73442407.0_73442426.0	126.559	78.9711	188.311	173.527	219.902	48.4144	0	0.718189	0	52.3442	110.524	0	26.1863	6.65237	4484.63	10.3665	0.320709	24.5738	23.213	0	0	0	77.7724	1.75453	0	88.6689	0	0	0	0	0	0	0	0	0	0	0	0	0	0	0	0	0	0	0	0	0	0
AFP	chr4_73447537.0_73447556.0	981.05	888.652	941.554	748.095	1602.4	1707.99	8.51374	889.118	0	905.443	739.611	0	357.682	2505.9	82.9639	22972.2	456.689	305.57	146.325	489.539	38.6225	158.309	313.661	228.089	7273.16	2824.6	0	0	0	0	0	0	0	0	0	0	0	0	0	0	0	0	0	0	0	0	0	0
AFP	chr4_73450655.0_73450674.0	1490.78	1774.58	1270.05	1059.48	1236.18	2031.33	12.7706	1023.42	0	755.093	1147.65	0	394.581	588.99	18.8814	2354.79	533.339	892.492	94.51	69.9342	7.35666	69.6559	268.347	149.135	2.79179	2248.25	0	0	0	0	0	0	0	0	0	0	0	0	0	0	0	0	0	0	0	0	0	0
AFP	chr4_73453786.0_73453805.0	387.532	191.528	336.17	486.84	443.309	104.091	0	280.812	0	87.9828	266.029	0	687.987	64.9885	1.14433	76.1539	87.8742	0	0	0	0	0	1.28549	1.75453	6.70029	0	0	0	0	0	0	0	0	0	0	0	0	0	0	0	0	0	0	0	0	0	0	0
AGMO	chr7_15365570.0_15365589.0	212.968	481.088	177.849	138.822	193.619	129.681	0	119.938	0	49.0031	37.9123	0	238.058	0	0	112.038	0.320709	0.356142	0.829035	0	0	0	0.321374	6.72572	0	0	0	0	0	0	0	0	0	0	0	0	0	0	0	0	0	0	0	0	0	0	0	0
AGMO	chr7_15387481.0_15387500.0	332.545	242.36	335.472	173.527	169.088	57.4056	4.25687	244.184	0	118.053	508.925	0	98.1988	5314.73	11.4433	27.1124	12.5076	0.356142	17.8243	13.9868	1.83917	6.33235	453.458	1.16969	0	0.985209	0	0	0	0	0	0	0	0	0	0	0	0	0	0	0	0	0	0	0	0	0	0
AGMO	chr7_15418598.0_15418617.0	283.667	290.468	424.048	413.573	478.354	311.581	0	628.415	0	93.5513	382.979	0	525.512	225.157	2.28866	84.9255	85.6292	0.356142	0.829035	0	0.919583	12.6647	331.336	175.161	0.558357	1.97042	0	0	0	0	0	0	0	0	0	0	0	0	0	0	0	0	0	0	0	0	0	0
AGMO	chr7_15431004.0_15431023.0	308.978	195.158	426.838	466.595	372.345	69.1634	4.25687	165.183	0	125.849	249.322	0	443.978	48.1017	1315.98	29.9034	8.65914	10956	4.97421	125.882	13.7937	88.6529	358.653	9.64994	9.49208	32.5119	0	0	0	0	0	0	0	0	0	0	0	0	0	0	0	0	0	0	0	0	0	0
AGMO	chr7_15544766.0_15544785.0	151.871	298.638	337.565	368.263	171.717	290.486	0	138.61	0	66.8224	89.3188	0	118.434	231.809	1.14433	1890.69	1.60354	816.99	1.24355	13.9868	0.919583	18.9971	1.60687	3.21665	0.558357	4.92605	0	0	0	0	0	0	0	0	0	0	0	0	0	0	0	0	0	0	0	0	0	0
AGMO	chr7_15561751.0_15561770.0	722.695	644.477	578.881	448.279	911.15	317.806	12.7706	427.322	0	1318.63	605.954	0	304.119	143.282	78.3866	90.9062	184.408	60.5442	0.829035	41.9605	2.75875	37.9941	105.411	92.9903	1741.52	951.712	0	0	0	0	0	0	0	0	0	0	0	0	0	0	0	0	0	0	0	0	0	0
AGRN	chr1_1043436.0_1043455.0	1109.35	1071.1	866.927	830.039	881.362	1451.05	8.51374	570.96	0	466.643	1554.4	2694.11	475.52	743.53	577.314	1214.08	316.539	10.3281	7.0468	321.697	26289	107.65	126.943	286.282	5411.04	27.5859	0	0	0	0	0	0	0	0	0	0	0	0	0	0	0	0	0	0	0	0	0	0
AGRN	chr1_1044399.0_1044418.0	590.027	328.592	729.53	877.277	625.539	553.653	4.25687	797.908	0	640.381	526.274	0	373.155	195.989	4.00515	312.988	572.786	12.465	9.94842	517.513	38.6225	208.968	29271	347.983	24.0094	183.249	0	0	0	0	0	0	0	0	0	0	0	0	0	0	0	0	0	0	0	0	0	0
AGRN	chr1_1046681.0_1046700.0	575.189	641.754	590.04	856.068	610.646	814.399	4.25687	420.141	0	332.998	715.193	0	251.746	5.11721	1.71649	362.03	235.721	1128.26	0.829035	27.9737	1.83917	12.6647	261.277	10.2348	1.11671	17.7338	0	0	0	0	0	0	0	0	0	0	0	0	0	0	0	0	0	0	0	0	0	0
AGRN	chr1_1048022.0_1048041.0	402.37	133.434	426.14	512.869	558.955	793.65	0	10.0546	0	963.356	803.87	0	292.811	727.667	1.71649	142.739	214.233	0.356142	0.414518	0	0.919583	6.33235	66.203	4.09391	1.11671	0.985209	0	0	0	0	0	0	0	0	0	0	0	0	0	0	0	0	0	0	0	0	0	0
AGRN	chr1_1048263.0_1048282.0	1164.34	867.774	1175.2	1261.93	1314.16	1454.16	12.7706	1135.46	0	1713.99	913.751	0	564.792	124.348	59.5051	454.93	42905.7	16.3825	22.384	937.118	21450.2	291.288	298.877	215.515	4003.98	63.0534	0	0	0	0	0	0	0	0	0	0	0	0	0	0	0	0	0	0	0	0	0	0
AGRN	chr1_1051276.0_1051295.0	737.533	975.792	801.367	714.354	838.433	368.295	17.0275	1632.44	0	982.289	660.574	0	620.735	827.964	5.14948	591.289	34.6365	0.356142	0.414518	0	0	0	208.571	34.7983	0	1.97042	0	0	0	0	0	0	0	0	0	0	0	0	0	0	0	0	0	0	0	0	0	0
AK5	chr1_77287007.0_77287026.0	276.684	656.277	363.37	294.032	711.398	40.4606	0	182.42	0	223.855	104.098	0	261.268	605.877	1.71649	33.8905	27.5809	0.356142	17.4097	0	0	0	18.3183	80.1237	1.11671	902.452	0	0	0	0	0	0	0	0	0	0	0	0	0	0	0	0	0	0	0	0	0	0
AK5	chr1_77293805.0_77293824.0	651.997	574.583	379.411	525.402	423.159	107.549	8.51374	109.165	0	387.57	113.737	0	308.88	5.11721	0	9.96779	158.43	1.42457	2.07259	83.921	7.35666	25.3294	117.623	113.752	1681.21	3079.76	0	0	0	0	0	0	0	0	0	0	0	0	0	0	0	0	0	0	0	0	0	0
AK5	chr1_77340386.0_77340405.0	368.33	175.189	391.268	409.717	395.124	158.038	4.25687	297.33	0	282.881	275.667	0	1667	23.0274	2.86082	36.6815	8.01772	0	10.3629	0	1.83917	12.6647	44.6709	38.8922	0	0.985209	0	0	0	0	0	0	0	0	0	0	0	0	0	0	0	0	0	0	0	0	0	0
AK5	chr1_77340387.0_77340406.0	638.905	413.01	567.722	697.001	652.699	271.466	4.25687	491.959	0	601.401	588.605	0	2169.3	48.6134	62.9381	61.4016	211.988	0.356142	23.213	13.9868	0.919583	18.9971	407.502	96.4994	1.11671	30.5415	0	0	0	0	0	0	0	0	0	0	0	0	0	0	0	0	0	0	0	0	0	0
AK5	chr1_77340474.0_77340493.0	892.022	1217.24	703.724	615.058	695.628	260.746	4.25687	436.659	0	1306.38	555.833	0	284.479	406.818	240.309	56.2183	19.8839	3.20528	4.97421	167.842	4.59791	56.9912	137.869	8.48025	4.46686	9629.44	0	0	1.97475	0	0	0	0	0	0	0	0.900405	13.3938	4.528	0	0.934958	5.12479	0	0	9788.97	0	0	0
AK5	chr1_77417656.0_77417675.0	420.699	1365.2	587.948	375.976	772.725	1074.8	4.25687	494.114	0	985.63	154.862	0	125.575	1.02344	0	302.223	41.3714	1.42457	1.24355	55.9473	1.83917	0	574.295	797.728	1.67507	31.5267	0	0	0	0	0	0	0	0	0	0	0	0	0	0	0	0	0	0	0	0	0	0
AKAP9	chr7_91994636.0_91994655.0	75.9354	341.3	142.977	272.823	143.681	38.3857	0	0	0	21.1604	61.6878	0	97.6037	81.8753	0	9.56907	520.831	0	0	13.9868	0	0	13.1763	0	0	1.97042	0	0	0	0	0	0	0	0	0	0	0	0	0	0	0	0	0	0	0	0	0	0
AKAP9	chr7_92001600.0_92001619.0	409.353	559.152	488.911	672.9	869.097	414.98	0	298.048	0	304.042	1049.98	0	493.97	2.04688	183.093	140.346	15.7147	3.20528	1.65807	55.9473	2.75875	50.6588	1104.88	183.056	1.67507	3436.41	0	0	0	0	0	0	0	0	0	0	0	0	0	0	0	0	0	0	0	0	0	0
AKAP9	chr7_92002911.0_92002930.0	121.322	134.342	125.541	173.527	251.442	26.9737	0	232.693	0	223.855	582.821	0	139.859	28.6563	1.14433	86.9191	6.73488	84.7618	0.414518	0	0	6.33235	0	125.742	0.558357	0.985209	0	0	0	0	0	0	0	0	0	0	0	0	0	0	0	0	0	0	0	0	0	0
AKAP9	chr7_92029932.0_92029951.0	1710.73	1016.64	749.058	828.11	833.176	740.394	12.7706	1784.7	0	928.831	1457.37	0	660.61	918.538	17.1649	457.322	826.146	0.712284	1.24355	27.9737	2.75875	12.6647	609.324	31.2892	1.67507	33.4971	0	0	0	0	0	0	0	0	0	0	0	0	0	0	0	0	0	0	0	0	0	0
AKAP9	chr7_92042165.0_92042184.0	518.455	709.832	574.697	367.299	487.115	1490.82	0	164.465	0	547.944	594.388	0	187.47	9.72269	2.86082	434.994	93.6469	2.49299	2.07259	0	10.1154	37.9941	38.5648	198.847	3131.27	6.89647	0	0	0	0	0	0	0	0	0	0	0	0	0	0	0	0	0	0	0	0	0	0
AKAP9	chr7_92084872.0_92084891.0	681.673	1174.58	735.807	611.201	714.902	626.966	4.25687	621.952	0	1149.35	703.627	0	455.285	77.2698	1426.41	2306.15	289.6	586.21	3.73066	195.816	5.5175	56.9912	575.901	149.72	5.58357	8481.67	0	0	0	0	0	0	0	0	0	0	0	0	0	0	0	0	0	0	0	0	0	0
AKR1C1	chr10_4963507.0_4963526.0	460.849	378.517	423.351	445.387	190.115	176.021	8.51374	322.467	0	56.799	166.429	0	120.219	837.686	21.7423	12.7588	142.395	0	0	13.9868	0	0	86.4495	0	0.558357	0	0	0	0	0	0	0	0	0	0	0	0	0	0	0	0	0	0	0	0	0	0	0
AKR1C1	chr10_4965969.0_4965988.0	617.084	663.539	470.08	622.77	258.451	171.179	8.51374	37.3458	0	608.084	218.478	0	72.0125	52.7072	2.28866	54.2248	71.518	2.84914	0	13.9868	0.919583	0	454.101	6.43329	0.558357	0	0	0	0	0	0	0	0	0	0	0	0	0	0	0	0	0	0	0	0	0	0	0
AKR1C1	chr10_4967012.0_4967031.0	430.3	355.824	389.873	319.097	511.646	48.7602	4.25687	665.761	0	236.106	177.995	0	203.539	514.279	0	35.4853	13.1491	896.766	1.24355	0	0.919583	0	188.325	17.5453	0	4.92605	0	0	0	0	0	0	0	0	0	0	0	0	0	0	0	0	0	0	0	0	0	0
AKR1C1	chr10_4968378.0_4968397.0	608.356	358.547	756.033	785.693	775.353	785.696	4.25687	532.896	0	375.319	1184.92	0	746.906	110.02	983.551	532.28	201.405	6.05442	2.90162	167.842	26223.7	107.65	1268.78	232.183	12.8422	62.0682	0	0	0	0	0	0	0	0	0	0	0	0	0	0	0	0	0	0	0	0	0	0
AKR1C1	chr10_4968865.0_4968884.0	344.764	796.973	822.29	726.886	572.973	582.01	0	461.795	0	294.018	415.108	0	309.475	296.798	44.6289	460.512	345.083	0.356142	0.414518	13.9868	0.919583	18.9971	309.161	33.6286	0.558357	1.97042	0	0	0	0	0	0	0	0	0	0	0	0	0	0	0	0	0	0	0	0	0	0
AKR1C1	chr10_4968895.0_4968914.0	307.233	201.512	378.714	345.126	159.451	360.341	4.25687	428.041	0	220.514	361.773	0	51.1824	0	0	88.9126	155.544	0	72.9551	0	0	0	2.89236	45.0331	0	0	0	0	0	0	0	0	0	0	0	0	0	0	0	0	0	0	0	0	0	0	0	0
AKR1C2	chr10_4998617.0_4998636.0	609.229	829.65	593.528	511.905	408.265	918.144	0	528.587	0	1375.43	289.804	0	292.216	67.5471	2.28866	273.915	36.8815	0.712284	1.65807	41.9605	3.67833	31.6618	1516.24	11.9893	1.67507	0.985209	0	0	0	0	0	0	0	0	0	0	0	0	0	0	0	0	0	0	0	0	0	0
AKR1C2	chr10_4998666.0_4998685.0	435.537	475.642	658.39	821.362	531.796	519.763	4.25687	150.101	0	332.998	240.968	0	877.243	163.751	1.71649	231.651	67.6695	1.06843	0.829035	27.9737	0.919583	12.6647	125.014	392.431	2.23343	378.32	0	0	0	0	0	0	0	0	0	0	0	0	0	0	0	0	0	0	0	0	0	0
AKR1C2	chr10_4999204.0_4999223.0	1096.26	965.808	1062.91	859.924	1078.49	831.69	4.25687	542.233	0	813.006	528.202	0	1067.69	905.745	194.536	876.766	324.237	424.165	47862.3	909.144	59.7729	27273.4	176.434	177.5	34.6182	122.166	0	0	0	0	0	0	0	0	0	0	0	0	0	0	0	0	0	0	0	0	0	0
AKR1C2	chr10_5000561.0_5000580.0	191.148	98.0331	272.004	250.65	190.115	32.161	8.51374	192.475	0	231.651	755.676	0	232.106	38.379	3300.82	34.6879	13.1491	53.0652	193.165	0	0.919583	6.33235	4.17786	26.9029	0	42.364	0	0	0	0	0	0	0	0	0	0	0	0	0	0	0	0	0	0	0	0	0	0
AKR1C2	chr10_5001587.0_5001606.0	313.343	162.481	224.578	240.046	146.31	91.6415	0	77.5644	0	87.9828	316.15	0	70.227	80.8518	0	9.17036	67.9902	1.78071	1.24355	41.9605	3.67833	44.3265	901.453	929.026	0	1.97042	0	0	0	0	0	0	0	0	0	0	0	0	0	0	0	0	0	0	0	0	0	0
AKR1C2	chr10_5001606.0_5001625.0	407.607	322.238	470.777	594.813	572.973	230.66	0	87.619	0	182.648	223.618	0	111.292	178.59	1.14433	49.0415	67.6695	0	0	0	0	6.33235	49.4915	46.4952	0	0	0	0	0	0	0	0	0	0	0	0	0	0	0	0	0	0	0	0	0	0	0	0
ALB	chr4_73408627.0_73408646.0	487.034	477.457	510.531	617.95	678.106	412.56	4.25687	886.963	0	599.174	289.162	0	746.906	470.783	1.71649	260.757	63.821	3.91756	2.90162	83.921	7.35666	37.9941	5485.85	199.14	3.35014	45.3196	0	0	0	0	0	0	0	0	0	0	0	0	0	0	0	0	0	0	0	0	0	0
ALB	chr4_73412062.0_73412081.0	56.7333	146.142	201.562	90.6198	218.15	71.5841	0	258.548	0	102.461	33.4142	0	142.835	0	0	20.3343	100.703	0	0.829035	0	0	0	6.42747	249.436	0	15.7634	0	0	0	0	0	0	0	0	0	0	2.70122	22916.8	2.264	0	0	2.56239	5.56661	9.6344	2.61318	0	0	0
ALB	chr4_73413628.0_73413647.0	186.784	145.234	265.03	304.637	336.425	328.526	8.51374	1303.51	0	332.998	354.705	0	109.507	82.8987	39.4794	48.6428	753.986	0.356142	0.829035	41.9605	0	0	1.60687	49.7118	0.558357	1.97042	0	0	0	0	0	0	0	0	0	0	0	0	0	0	0	0	0	0	0	0	0	0
ALB	chr4_73415135.0_73415154.0	796.012	603.63	736.504	655.547	410.893	739.702	4.25687	458.923	0	827.484	652.22	0	615.974	212.364	0	11.5626	108.4	0.712284	0.414518	55.9473	2.75875	0	166.472	447.406	6.70029	0.985209	0	0	0	0	0	0	0	0	0	0	0	0	0	0	0	0	0	0	0	0	0	0
ALB	chr4_73415146.0_73415165.0	528.056	678.062	473.567	412.609	559.831	474.807	0	374.895	0	929.945	1033.27	0	973.656	3773.43	120.727	79.3436	498.381	1.42457	1292.47	13.9868	1.83917	12.6647	616.073	176.038	5.02522	4.92605	0	0	0	0	0	0	0	0	0	0	0	0	0	0	0	0	0	0	0	0	0	0
ALB	chr4_73415150.0_73415169.0	1181.8	1090.16	717.673	638.195	764.84	573.364	8.51374	1043.53	0	455.506	1060.9	0	649.897	153.004	4.00515	389.541	976.558	0.356142	0	41.9605	1.83917	12.6647	18.961	183.056	2.23343	1.97042	0	0	0	0	0	0	0	0	0	0	0	0	0	0	0	0	0	0	0	0	0	0
ALDH1A2	chr15_57962013.0_57962032.0	287.158	562.783	647.231	712.426	603.637	264.896	0	813.708	0	962.242	683.064	0	970.085	339.782	0	208.925	42.0128	0.712284	0.414518	13.9868	3.67833	0	436.104	38.8922	8.37536	1208.85	0	0	0	0	0	0	0	0	0	0	0	0	0	0	0	0	0	0	0	0	0	0
ALDH1A2	chr15_57964022.0_57964041.0	228.679	107.11	279.676	375.976	300.504	252.792	0	194.629	0	415.412	23.7755	0	51.1824	0	14.3041	114.829	203.65	1.42457	0.829035	41.9605	7.35666	18.9971	1269.75	62.286	1.67507	333.001	0	0	0	0	0	0	0	0	0	0	0	0	0	0	0	0	0	0	0	0	0	0
ALDH1A2	chr15_57992706.0_57992725.0	910.352	1222.69	749.756	713.39	1073.23	385.932	17.0275	1234.57	0	496.713	647.08	0	512.419	126.907	3.43299	259.96	43.6164	517.831	386.33	27.9737	4.59791	12.6647	23.7816	677.835	0.558357	300.489	0	0	0	0	0	0	0	0	0	0	0	0	0	0	0	0	0	0	0	0	0	0
ALDH1A2	chr15_57992787.0_57992806.0	77.681	330.408	242.712	148.462	292.619	21.7865	306.495	243.466	0	71.2772	177.995	0	312.451	19.9571	0.572165	24.3214	28.8638	0	0	0	0	0	112.481	0.584845	0	0	0	0	0	0	0	0	0	0	0	0	0	0	0	0	0	0	0	0	0	0	0	0
ALDH1A2	chr15_58010683.0_58010702.0	1375.57	1040.24	648.626	884.989	1165.22	930.939	4.25687	853.208	0	689.384	529.487	0	288.05	2.5586	5.14948	617.604	142.715	13.5334	0.829035	97.9078	4.59791	44.3265	183.183	259.964	4887.3	7.88168	0	0	0	0	0	0	0	0	0	0	0	0	0	0	0	0	0	0	0	0	0	0
ALDH1A2	chr15_58065544.0_58065563.0	637.159	414.825	724.648	402.969	546.69	356.883	4.25687	438.095	0	204.922	400.971	0	432.67	91.598	8.01031	86.1217	247.587	141.388	0.414518	55.9473	3.67833	12.6647	1252.07	146.796	1.67507	9.85209	0	0	0	0	0	0	0	0	0	0	0	0	0	0	0	0	0	0	0	0	0	0
ALDH1L1	chr3_126118029.0_126118048.0	487.034	495.612	753.243	644.943	372.345	147.664	0	234.13	0	704.976	532.058	0	307.094	1.02344	30.8969	17.1446	147.526	0.356142	0.829035	0	1.83917	0	90.9487	22.8089	0	0	0	0	0	0	0	0	0	0	0	0	0	0	0	0	0	0	0	0	0	0	0	0
ALDH1L1	chr3_126125681.0_126125700.0	652.87	718.002	516.111	600.597	579.982	139.71	8.51374	364.84	0	317.406	602.099	0	98.1988	33.2618	0	63.7938	42.0128	64.4617	0	0	0	6.33235	48.206	214.638	0	0	0	0	0	0	0	0	0	0	0	0	0	0	0	0	0	0	0	0	0	0	0	0
ALDH1L1	chr3_126131438.0_126131457.0	376.186	380.332	624.913	643.979	461.708	1309.26	0	165.902	0	571.331	69.3988	0	202.349	598.201	23.4588	2746.32	139.829	0.712284	1.65807	27.9737	6.43708	18.9971	88.6991	6.72572	5.02522	1.97042	0	0	0	0	0	0	0	0	0	0	0	0	0	0	0	0	0	0	0	0	0	0
ALDH1L1	chr3_126135578.0_126135597.0	261.846	255.975	460.315	348.018	338.177	388.007	0	175.956	0	100.234	475.51	0	174.377	1.02344	0.572165	98.8804	194.991	0.356142	0	0	1.83917	0	30.8519	243.88	0.558357	0.985209	0	0	0	0	0	0	0	0	0	0	0	0	0	0	0	0	0	0	0	0	0	0
ALDH1L1	chr3_126150506.0_126150525.0	197.257	224.205	268.517	320.061	226.911	30.7777	0	86.9009	0	63.4813	261.531	0	31.5426	0	1.71649	1.59485	2.88638	0	0.414518	0	0	0	5.78472	451.208	0.558357	0	0	0	0	0	0	0	0	0	0	0	0	0	0	0	0	0	0	0	0	0	0	0
ALDH1L1	chr3_126154636.0_126154655.0	458.231	501.058	559.353	603.489	742.937	691.634	0	316.721	0	228.31	220.405	0	208.3	379.185	1.14433	616.009	1094.9	1.42457	2.48711	41.9605	2.75875	25.3294	459.564	218.732	5039.18	8.86689	0	0	0	0	0	0	0	0	0	0	0	0	0	0	0	0	0	0	0	0	0	0
ALDH3A1	chr17_19739060.0_19739079.0	336.909	112.557	401.032	447.315	268.964	232.735	0	229.102	0	158.146	55.262	0	122.005	394.537	0	104.064	85.9499	0	0	0	0.919583	6.33235	15.1046	0	0	0	0	0	0	0	0	0	0	0	0	0	0	0	0	0	0	0	0	0	0	0	0	0
ALDH3A1	chr17_19740328.0_19740347.0	758.481	344.024	700.935	757.736	548.442	1461.42	0	443.841	0	681.588	722.904	0	358.872	49.6369	5.72165	339.702	574.389	795.265	0.414518	55.9473	0	31.6618	197.645	40.0619	0.558357	18.719	0	0	0	0	0	0	0	0	0	0	0	0	0	0	0	0	0	0	0	0	0	0
ALDH3A1	chr17_19742037.0_19742056.0	844.017	1283.51	852.281	643.015	829.672	236.193	8.51374	1278.38	0	641.495	1094.32	0	1308.13	86.4808	9.7268	12746.4	71.518	6.7667	7.46132	195.816	11.9546	56.9912	156.83	59.3618	4661.73	25.6154	11.836	18.4355	4301.01	17.3275	21374.3	0	13.4045	7754.65	2.55211	30.3829	0.900405	35480.1	516.191	0	0.934958	5.12479	2.7833	4.8172	0	0	0	0
ALDH3A1	chr17_19742189.0_19742208.0	614.466	657.185	712.791	602.525	370.593	612.788	0	278.657	0	815.233	520.491	0	167.831	44.008	0.572165	119.613	53.5584	1.06843	0.414518	41.9605	0	12.6647	467.599	3.21665	0	0	0	0	0	9170.56	14.2622	0	0	0	5.10422	0	0	0	0	0	0	0	0	0	0	0	0	0
ALDH3A1	chr17_19743420.0_19743439.0	812.596	450.226	552.378	578.424	554.575	455.095	4.25687	165.902	0	888.738	181.208	0	94.6279	300.892	2.28866	92.501	108.72	31.3405	0	13.9868	2.75875	0	99.3044	61.7011	0.558357	1.97042	0	0	0	0	0	0	0	0	0	0	871.592	0	0	0	0	2.56239	0	0	0	2.64664	0	0
ALDH3A1	chr17_19745038.0_19745057.0	609.229	782.449	601.897	459.847	499.38	166.338	1315.37	934.364	0	786.277	538.483	0	300.548	105.414	0.572165	191.78	1154.87	0.356142	1.24355	13.9868	0.919583	0	70.0594	97.9615	0	2.95563	0	0	3222.79	4.33187	0	5.46598	2.6809	0	2.55211	6.07657	0	0	0	0	0	0	0	0	0	0	0	0
ALX4	chr11_44264876.0_44264895.0	892.895	1014.82	1036.41	980.429	854.203	1767.12	25.5412	10070.4	33986.4	810.778	855.276	0	414.816	803.401	1.14433	688.973	352.459	1.42457	1.65807	55.9473	6.43708	31.6618	294.7	1066.17	3.9085	60.0978	2.36721	0	0	4.33187	14.2622	5.46598	0	0	0	0	0	0	0	0	0	0	0	0	0	2.64664	8.87872	0
ALX4	chr11_44275395.0_44275414.0	1226.31	2176.7	1238.67	1310.13	1784.63	2244.01	4.25687	1215.18	0	2336.56	4039.91	0	639.185	384.814	13.1598	2534.61	1783.78	336.198	3.73066	111.895	7.35666	82.3206	1430.11	460.858	2.23343	15.7634	0	0	0	0	0	0	0	0	0	0	0	0	0	0	0	0	0	0	0	0	0	0
ALX4	chr11_44275482.0_44275501.0	795.139	559.152	719.766	582.28	519.531	630.424	4.25687	188.884	0	583.582	409.967	0	427.314	157.098	0	2001.53	12.5076	0.712284	1.65807	55.9473	4.59791	6.33235	18.3183	5.55603	1.67507	0.985209	0	0	0	0	0	0	0	0	0	0	0	0	0	0	0	0	0	0	0	0	0	0
ALX4	chr11_44275604.0_44275623.0	977.559	638.123	689.078	545.647	586.115	778.78	0	593.224	0	848.644	873.268	0	589.193	139.7	2.28866	552.614	711.973	1.06843	1.24355	27.9737	0.919583	18.9971	20.5679	27.1953	1.11671	13.7929	0	0	0	0	0	0	0	0	0	0	0	0	0	0	0	0	0	0	0	0	0	0
ALX4	chr11_44309683.0_44309702.0	761.972	838.728	501.465	544.683	651.823	2466.02	0	805.09	0	2572.66	1031.99	0	175.568	48.1017	0	1022.69	416.921	2.13685	0.829035	13.9868	5.5175	12.6647	259.67	130.128	3.35014	7.88168	0	0	0	0	0	0	0	0	0	0	0	0	0	0	0	0	0	0	0	0	0	0
ALX4	chr11_44309917.0_44309936.0	1008.98	1236.31	862.045	939.939	617.654	1035.03	12.7706	930.055	0	535.693	1016.56	0	466.593	253.302	298.098	272.719	1128.89	1.78071	2.07259	83.921	2.75875	6.33235	311.411	1039.56	2.79179	10.8373	0	0	0	0	0	0	0	0	0	0	0	0	0	0	0	0	0	0	0	0	0	0
ANGPT4	chr20_878284.0_878303.0	990.651	448.411	843.214	811.722	955.831	779.817	4.25687	457.486	0	708.317	670.855	0	761.189	7.16409	28.0361	471.676	330.33	4959.28	21.5549	97.9078	8.27625	56.9912	13.1763	21.0544	5.02522	5.91126	0	0	0	0	0	0	0	0	0	0	0	0	0	0	0	0	0	0	0	0	0	0
ANGPT4	chr20_881198.0_881217.0	150.125	191.528	202.26	296.924	169.964	409.101	0	52.4278	0	106.916	124.661	0	120.219	0	2.28866	246.404	406.017	0.356142	0.414518	0	0	6.33235	0.321374	0.292422	0.558357	0	0	0	0	0	0	0	0	0	0	0	0	0	0	0	0	0	0	0	0	0	0	0
ANGPT4	chr20_885196.0_885215.0	740.152	438.426	471.474	493.589	906.769	795.379	4.25687	769.898	0	826.37	904.112	0	615.974	238.973	321.557	1440.94	2356.57	4.98599	2.07259	209.803	9.19583	69.6559	11.5694	7.89541	6956.02	6.89647	0	0	0	0	0	0	0	0	0	0	0	0	0	0	0	0	0	0	0	0	0	0
ANGPT4	chr20_888315.0_888334.0	398.006	108.926	273.399	273.787	393.371	180.516	0	20.8275	0	1288.56	55.9046	0	70.8222	1.02344	0	36.2827	0.641417	0	0.414518	0	0	6.33235	19.6038	255.285	1.11671	0.985209	0	0	0	0	0	0	0	0	0	0	0	0	0	0	0	0	0	0	0	0	0	0
ANGPT4	chr20_890220.0_890239.0	645.887	915.883	567.025	874.384	997.008	897.741	8.51374	1703.54	0	464.416	622.662	0	132.122	135.606	224.289	1828.89	1.60354	568.759	104.873	55.9473	4.59791	18.9971	469.527	233.646	2.23343	1751.7	0	0	0	0	0	0	0	0	0	0	0	0	0	0	0	0	0	0	0	0	0	0
ANGPT4	chr20_890270.0_890289.0	748.88	472.919	726.74	870.528	627.292	458.899	4.25687	1934.08	0	710.545	287.877	0	336.852	231.298	4.00515	114.43	114.814	0.356142	0	0	0.919583	12.6647	155.223	74.5677	1.67507	0.985209	4.73442	0	0	0	16216.1	10.932	5.3618	0	1.27605	0	0	0	0	0	0	0	0	0	0	0	0	0
ANGPTL1	chr1_178853663.0_178853682.0	310.724	368.532	431.022	362.479	676.353	91.2957	8.51374	327.494	0	747.297	123.376	0	110.697	129.465	88.6856	201.349	243.097	297.735	0	0	1.83917	18.9971	257.42	84.2177	6.70029	2.95563	0	0	0	0	0	0	0	0	0	0	0	0	0	0	0	0	0	0	0	0	0	0
ANGPTL1	chr1_178865055.0_178865074.0	518.455	480.181	389.176	454.063	579.106	198.153	0	416.55	0	289.564	253.177	0	105.936	1087.41	1.71649	35.884	194.029	0.356142	0	27.9737	0	18.9971	149.117	3.50907	0.558357	0	0	0	0	0	0	0	0	0	0	0	0	0	0	0	0	0	0	0	0	0	0	0
ANGPTL1	chr1_178865259.0_178865278.0	600.5	453.857	385.688	371.155	617.654	291.178	4.25687	556.596	0	631.472	1271.67	0	151.167	1149.84	5.14948	552.215	0.641417	0.712284	144.252	27.9737	0.919583	12.6647	985.331	126.326	1.11671	0.985209	0	0	0	0	0	0	0	0	0	0	0.900405	13.3938	6.79199	0	0.934958	0	0	4.8172	10460.6	0	0	0
ANGPTL1	chr1_178865463.0_178865482.0	431.173	494.704	442.879	347.054	500.256	130.027	4.25687	3657.74	0	200.467	213.337	0	48.8018	1783.35	0	55.8196	1005.1	1.78071	89.1213	41.9605	2.75875	18.9971	88.6991	600.343	11.1671	278.814	0	0	0	0	0	0	0	0	0	0	0	0	0	0	0	0	0	0	0	0	0	0
ANGPTL1	chr1_178865593.0_178865612.0	326.435	50.832	160.413	190.88	94.6194	59.4805	0	270.039	8015.18	276.199	61.6878	0	294.001	0	4.00515	20.733	0	0	0	0	0	0	4.49923	0.877267	0	0	0	0	0	0	0	0	0	0	0	0	0	0	0	0	0	0	0	0	0	0	0	1.83908
ANGPTL1	chr1_178865734.0_178865753.0	580.426	623.599	689.078	486.84	638.681	421.897	12.7706	347.603	0	249.47	2062.04	192.436	208.3	709.245	0.572165	353.657	48.1063	0.356142	0.829035	13.9868	1.83917	0	313.982	56.7299	0	12.8077	0	0	0	0	0	0	0	0	0	0	0	0	0	0	0	0	0	0	0	0	0	0
ANGPTL5	chr11_101900454.0_101900473.0	441.647	573.675	520.296	457.919	372.345	571.635	0	147.947	0	424.322	117.592	0	185.685	409.888	0.572165	364.821	226.1	506.434	0	27.9737	3.67833	12.6647	203.108	7.60298	1.11671	0.985209	0	0	0	0	0	0	0	0	0	0	0	0	0	0	0	0	0	0	0	0	0	0
ANGPTL5	chr11_101900524.0_101900543.0	610.974	447.503	431.022	462.739	606.265	305.702	12.7706	364.122	0	387.57	289.804	0	400.532	55.7775	72.6649	123.202	321.992	1.42457	0.829035	41.9605	5.5175	50.6588	18.3183	121.063	3519.89	29.5563	0	0	0	0	0	0	0	0	0	0	0	0	0	0	0	0	0	0	0	0	0	0
ANGPTL5	chr11_101900527.0_101900546.0	483.543	937.668	460.315	371.155	316.274	577.168	0	267.166	0	1414.41	297.515	0	226.75	90.5745	0	57.0157	97.8162	0	0.414518	13.9868	0	6.33235	92.2342	83.048	0	13.7929	0	0	0	0	0	0	0	0	0	0	0	0	0	0	0	0	0	0	0	0	0	0
ANGPTL5	chr11_101902666.0_101902685.0	467.832	330.408	395.453	604.453	501.132	293.944	0	247.775	0	294.018	417.035	0	207.11	140.211	633.386	143.536	46.5028	1.06843	171.61	0	1.83917	6.33235	48.5274	264.057	0.558357	11.8225	0	0	0	0	0	0	0	0	0	0	0	0	0	0	0	0	0	0	0	0	0	0
ANGPTL5	chr11_101905744.0_101905763.0	114.339	185.174	125.541	119.541	95.4955	23.5156	4.25687	25.8548	0	116.939	187.634	0	52.3727	0	0	17.1446	0.320709	0	0	0	0	0	11.2481	0	0	0	0	0	0	0	0	0	0	0	0	0	0	0	0	0	0	0	0	0	0	0	0	0
ANGPTL5	chr11_101907815.0_101907834.0	386.659	755.218	544.009	620.842	789.371	514.23	4.25687	458.205	0	416.526	267.314	0	213.062	404.259	0.572165	299.831	281.903	62.3249	0	0	0.919583	0	312.375	2.6318	0	0	0	0	0	0	0	0	0	0	0	0	0	0	0	0	0	0	0	0	0	0	0	0
ANGPTL7	chr1_11189632.0_11189651.0	1053.49	716.186	843.911	895.593	857.707	434.692	4.25687	530.023	0	1171.62	584.749	0	298.167	1507.02	17.7371	841.68	106.155	170.236	347.366	167.842	5.5175	37.9941	146.225	1198.05	2.23343	9.85209	0	0	0	0	0	0	2.6809	9.05389	0	12.1531	0	0	0	0	0	0	0	0	0	0	0	0
ANGPTL7	chr1_11189699.0_11189718.0	487.034	774.28	598.41	613.13	514.274	327.143	21.2843	2877.78	0	708.317	444.666	0	390.415	192.919	2.28866	531.084	37.5229	1.06843	0	27.9737	2.75875	18.9971	49.8129	90.9434	0.558357	2134.95	0	0	0	0	0	0	0	0	0	0	0	0	0	0	0	0	0	0	0	0	0	0
ANGPTL7	chr1_11189789.0_11189808.0	885.913	1108.32	894.128	719.174	1166.97	391.465	4.25687	865.418	0	1396.59	2636.51	0	1521.19	362.298	4.00515	106.855	259.453	0.712284	1.24355	55.9473	1.83917	18.9971	385.006	106.442	2.23343	2440.36	0	0	0	0	0	0	0	0	0	0	0	0	0	0	0	0	0	0	0	0	0	0
ANGPTL7	chr1_11193586.0_11193605.0	166.709	585.475	423.351	328.738	367.088	297.057	0	142.201	0	220.514	247.394	0	1209.33	0	2.86082	704.922	253.681	0	41.8663	27.9737	0.919583	12.6647	41.1358	0.584845	1.11671	0.985209	0	0	0	0	0	0	0	0	0	0	0	0	0	0	0	0	0	0	0	0	0	0
ANGPTL7	chr1_11193644.0_11193663.0	1019.45	1166.41	1025.95	1136.6	1073.23	884.945	4.25687	377.049	0	424.322	1630.87	0	283.884	759.905	25.7474	377.978	67.0281	1.06843	1.24355	27.9737	0.919583	0	43.0641	493.901	3.35014	0.985209	0	0	0	0	0	0	0	0	0	0	0	0	0	0	0	0	0	0	0	0	0	0
ANGPTL7	chr1_11193661.0_11193680.0	694.765	793.342	661.878	631.446	630.796	562.99	881.172	1768.18	0	570.218	543.624	0	727.861	58.8479	56.0722	15291	269.395	287.407	3.73066	209.803	8.27625	69.6559	254.207	25.4408	8.93372	11.8225	0	0	0	0	0	0	0	0	0	0	0	0	0	0	0	0	0	0	0	0	0	0
ANK1	chr8_41664933.0_41664952.0	1201	1077.46	774.167	923.55	726.291	1226.61	0	1043.53	0	511.191	1096.24	0	1163.51	1307.96	254.613	760.343	4083.58	66.2424	3.73066	83.921	5.5175	75.9882	887.312	737.197	1.67507	49.2605	0	0	0	0	0	0	0	0	0	0	0	0	0	0	0	0	0	0	0	0	0	0
ANK1	chr8_41694717.0_41694736.0	547.258	434.795	768.587	713.39	595.752	873.188	4.25687	412.24	0	2225.19	515.993	0	565.982	21.4923	2.28866	621.591	2092.3	507.146	22.384	55.9473	7.35666	31.6618	91.2701	152.937	1.67507	5.91126	0	0	0	0	0	0	0	0	0	0	0	0	0	0	0	0	0	0	0	0	0	0
ANK1	chr8_41706159.0_41706178.0	500.999	405.748	689.775	797.261	787.619	881.487	8.51374	1467.98	0	1748.52	409.967	0	271.386	7.67581	4367.33	428.615	2642.32	127.499	3.73066	41.9605	8.27625	50.6588	79.3793	178.085	2941.43	90.6393	0	0	0	0	0	0	0	0	0	0	0	0	0	0	0	0	0	0	0	0	0	0
ANK1	chr8_41715034.0_41715053.0	294.14	490.165	331.985	496.481	176.097	153.543	0	142.201	0	263.948	114.38	0	354.706	660.631	13.732	113.234	183.766	0.712284	0.829035	27.9737	2.75875	18.9971	1128.99	40.9391	1.67507	2.95563	0	0	0	0	0	0	0	0	0	0	0	0	0	0	0	0	0	0	0	0	0	0
ANK1	chr8_41718116.0_41718135.0	1571.95	1699.24	884.363	814.614	1202.89	1278.83	17.0275	2022.42	0	3412.4	2703.34	0	632.043	1101.22	26.8917	370.004	685.996	3.20528	2.90162	97.9078	5.5175	56.9912	1349.45	634.557	2.23343	3423.6	0	0	0	0	0	0	0	0	0	0	0	0	0	0	0	0	0	0	0	0	0	0
ANK1	chr8_41733972.0_41733991.0	128.305	151.588	218.301	187.024	283.858	141.785	4.25687	423.013	0	100.234	16.0645	0	668.347	604.342	4.57732	3.98711	18.2804	0.356142	0.414518	27.9737	0	0	740.445	4.67876	0.558357	0	0	0	0	0	0	0	0	0	0	0	0	0	0	0	0	0	0	0	0	0	0	0
ANK3	chr10_60059954.0_60059973.0	203.367	311.346	412.889	449.243	403.885	151.122	0	199.657	0	152.578	50.1214	0	52.9678	55.7775	1.14433	7.97423	21.8082	0.356142	0	0	0	0	4.17786	9.64994	0	156.648	0	0	0	0	0	0	0	0	0	0	0	0	0	0	0	0	0	0	0	0	0	0
ANK3	chr10_60073183.0_60073202.0	1232.42	1103.78	889.943	1077.8	783.238	435.038	0	436.659	0	444.369	301.371	0	433.265	238.973	0.572165	134.764	108.72	8.19127	4.55969	237.776	11.035	107.65	1023.57	7922.6	1486.35	135.959	0	0	0	0	0	0	0	0	0	0	0	0	0	0	0	0	0	0	0	0	0	0
ANK3	chr10_60073199.0_60073218.0	851.873	580.937	1009.21	1002.6	966.344	829.615	0	1045.68	0	971.152	1193.92	0	2280.59	12.793	11.4433	918.631	924.924	2.13685	2.07259	27.9737	0	6.33235	283.773	47.3724	1.67507	1.97042	0	0	0	0	0	0	0	0	0	0	0	0	0	0	0	0	0	0	0	0	0	0
ANK3	chr10_60075260.0_60075279.0	547.258	781.542	577.486	597.705	673.725	446.104	4.25687	1554.16	0	308.497	294.945	0	359.467	2.5586	5.72165	199.754	84.3464	0.356142	0.414518	27.9737	0.919583	6.33235	131.442	22.8089	0.558357	1.97042	0	0	0	0	0	0	0	0	0	0	0	0	0	0	0	0	0	0	0	0	0	0
ANK3	chr10_60108953.0_60108972.0	683.418	486.535	600.502	515.761	774.477	291.869	8.51374	747.635	0	1362.06	170.284	0	93.4376	72.1526	2.28866	61.4016	328.726	55.202	0.829035	0	0.919583	0	28.2809	5.2636	0.558357	0.985209	0	0	0	0	0	0	0	0	0	0	0	0	0	0	0	0	0	0	0	0	0	0
ANK3	chr10_60173163.0_60173182.0	334.29	807.865	498.675	370.191	367.964	416.709	0	137.174	0	219.4	342.496	0	956.397	1.02344	5.72165	313.786	273.565	1.06843	0	13.9868	0.919583	12.6647	35.3511	4.67876	0	0	0	0	0	0	0	0	0	0	0	0	0	0	0	0	0	0	0	0	0	0	0	0
ANKRD53	chr2_70978784.0_70978803.0	608.356	624.507	700.237	753.879	493.247	812.324	0	203.247	0	702.749	83.5356	0	147.001	62.9416	15.4485	308.204	18.2804	0	47.255	41.9605	1.83917	6.33235	342.906	9.35752	1.11671	1.97042	0	0	0	0	0	0	0	0	0	0	0	0	0	0	0	0	0	0	0	0	0	0
ANKRD53	chr2_70979217.0_70979236.0	1003.74	726.171	665.365	777.016	863.84	532.904	8.51374	1620.23	0	371.978	1328.22	0	2449.61	4.60548	289.515	4189.66	146.564	73.0091	43.5244	391.631	22.9896	170.973	351.261	13090.6	32.3847	144.826	0	0	0	0	0	0	0	0	0	0	0	0	0	0	0	0	0	0	0	0	0	0
ANKRD53	chr2_70979250.0_70979269.0	453.867	491.981	799.275	1085.51	527.416	672.96	8.51374	156.565	0	719.454	307.797	0	104.15	6.65237	0.572165	250.789	178.635	0.712284	0	0	1.83917	6.33235	86.4495	25.1483	0.558357	0.985209	0	0	0	0	0	0	0	0	0	0	0	0	0	0	0	0	0	0	0	0	0	0
ANKRD53	chr2_70979723.0_70979742.0	844.017	479.273	765.797	542.755	395.124	165.3	4.25687	436.659	0	189.33	628.445	0	216.037	23.5391	149.907	57.4144	90.4399	0	0.414518	0	0.919583	0	149.439	109.366	0.558357	0.985209	0	0	0	0	0	0	0	0	0	0	0	0	0	0	0	0	0	0	0	0	0	0
ANKRD53	chr2_70979789.0_70979808.0	1164.34	1554.01	1084.53	1404.61	1159.09	1259.12	21.2843	326.058	0	1735.15	695.273	0	1840.19	32.2384	5.14948	809.384	1115.75	672.752	1.24355	27.9737	2.75875	37.9941	285.38	17.2529	1.67507	14.7781	2.36721	4.60887	5.92425	4.33187	0	10.932	2.6809	4.52694	6132.72	12.1531	0	0	0	0	0	0	0	0	0	0	0	0
ANKRD53	chr2_70982592.0_70982611.0	604.865	288.653	412.191	523.474	300.504	117.924	8.51374	538.642	0	332.998	208.196	0	102.96	653.979	201.974	33.093	80.8186	0.356142	0	0	0	0	25.3885	47.6649	0	7.88168	0	0	0	0	0	0	0	0	0	0	0	0	0	0	0	0	0	0	0	0	0	0
ANO3	chr11_26525640.0_26525659.0	513.218	1009.38	626.308	777.016	687.743	383.857	25.5412	4011.08	0	1075.84	624.589	0	750.477	36.8439	0.572165	160.681	5474.18	203.713	60.9341	97.9078	7.35666	25.3294	475.954	60.239	2312.16	6.89647	0	0	1.97475	0	9.50812	0	0	6650.08	0	0	0	0	0	0	0	0	0	0	0	0	0	0
ANO3	chr11_26542000.0_26542019.0	518.455	610.891	407.309	348.983	599.256	110.661	4.25687	474.723	0	728.364	251.249	0	149.976	12.2813	0.572165	56.617	103.589	19.944	0.414518	13.9868	0	0	85.8067	66.3799	0	0	0	0	0	0	0	0	0	0	0	0	0	0	0	0	0	0	0	0	0	0	0	0
ANO3	chr11_26553287.0_26553306.0	208.604	45.3857	285.953	306.565	222.531	87.8375	0	38.064	0	406.503	93.1743	0	102.96	81.3636	6.86598	36.2827	0.320709	0	0	0	0	0	8.35571	37.7225	0	0	0	0	0	0	0	0	0	0	0	0	0	0	0	0	0	0	0	0	0	0	0	0
ANO3	chr11_26599593.0_26599612.0	360.475	960.361	438.694	327.774	690.371	543.97	4.25687	165.902	0	638.154	478.723	0	163.07	71.1292	2.86082	332.525	27.2602	102.213	1.24355	41.9605	4.59791	6.33235	2069.32	2.92422	2.23343	0	0	0	0	0	0	0	0	0	0	0	0	0	0	0	0	0	0	0	0	0	0	0
ANO3	chr11_26634207.0_26634226.0	854.491	1038.42	680.011	615.058	961.964	432.617	0	487.65	0	547.944	742.824	0	170.806	44.5197	2589.62	137.954	143.357	1712.69	197.31	13.9868	2.75875	31.6618	89.0205	125.742	221.668	9.85209	0	0	0	0	0	0	0	0	0	0	0	0	0	0	0	0	0	0	0	0	0	0
ANO3	chr11_26647826.0_26647845.0	317.707	281.391	368.95	318.133	454.699	231.352	0	222.639	0	158.146	452.377	0	168.426	105.926	4.00515	96.8869	27.2602	12.1088	15758.3	531.5	21875	227.965	109.267	1103.31	30.7097	60.0978	0	0	0	0	0	0	0	0	0	0	0	0	0	0	0	0	0	0	0	0	0	0
AOC3	chr17_42851935.0_42851954.0	768.082	431.164	513.321	479.128	495.876	178.096	4.25687	140.765	0	234.992	354.705	0	179.138	117.184	3.43299	371.2	29.1845	0.712284	0.414518	27.9737	2.75875	0	223.355	65.2102	1400.92	1.97042	0	0	0	0	0	0	0	0	0	0	0	0	0	0	0	0	0	0	0	0	0	0
AOC3	chr17_42852525.0_42852544.0	1442.77	1345.23	1054.54	1034.42	1248.45	2246.43	12.7706	1007.62	0	2596.05	1511.35	0	762.975	2964.4	12.5876	1041.04	2257.47	4.98599	4.97421	167.842	15.6329	56.9912	4360.72	2815.74	3.9085	33.4971	0	0	0	0	0	0	0	0	0	0	0	0	0	0	0	0	0	0	0	0	0	0
AOC3	chr17_42852674.0_42852693.0	365.712	538.274	431.72	624.698	475.725	196.424	0	219.766	0	184.875	198.558	0	205.92	1250.64	2452.3	81.7358	194.349	18.1632	0.414518	0	0	12.6647	21.532	3.80149	0	1.97042	0	0	0	0	0	0	0	0	0	0	0	0	0	0	0	0	0	0	0	0	0	0
AOC3	chr17_42852813.0_42852832.0	1021.2	903.175	872.507	594.813	871.725	951.688	4.25687	254.957	0	206.036	1154.08	0	532.654	77.2698	5.14948	1591.26	1919.12	659.931	5.80325	321.697	19.3112	132.979	469.527	7791.6	7156.47	17.7338	0	0	0	0	0	0	0	0	0	0	0	0	0	0	0	0	0	0	0	0	0	0
AOC3	chr17_42852817.0_42852836.0	295.013	224.205	498.675	516.726	305.761	625.929	0	198.22	0	112.484	4.49807	0	1010.55	1139.09	98.4124	197.761	8323.35	1.78071	2.90162	83.921	11.035	63.3235	58.49	23.9786	2.79179	448.27	0	0	0	0	0	0	0	0	0	0	0	0	0	0	0	0	0	0	0	0	0	0
AOC3	chr17_42855523.0_42855542.0	583.044	445.688	579.579	783.765	744.69	288.411	8.51374	117.065	0	181.534	249.322	0	110.697	67.0354	16.5928	43.4595	230.269	1149.98	1.65807	69.9342	2.75875	0	980.832	163.172	0.558357	8.86689	0	0	0	0	0	0	0	0	0	0	0	0	0	0	0	0	0	0	0	0	0	0
APC	chr5_112835092.0_112835111.0	300.25	264.145	442.182	485.876	367.964	220.631	0	691.616	0	72.3909	131.087	0	56.5387	17.3985	1.71649	101.273	126.039	0.356142	27.3582	0	0	0	38.8862	0.292422	0	18.719	0	0	0	0	0	0	0	0	0	0	0	0	0	0	0	0	0	0	0	0	0	0
APC	chr5_112837679.0_112837698.0	818.706	764.295	1065.7	1101.9	784.991	643.219	8.51374	355.504	0	701.635	1073.75	0	441.597	103.368	14.3041	139.948	1489.37	1798.87	9.53391	55.9473	1.83917	56.9912	247.458	52.3436	2.23343	6.89647	0	0	0	0	0	0	0	0	0	0	0	0	0	0	0	0	0	0	0	0	0	0
APC	chr5_112838919.0_112838938.0	281.048	217.851	408.007	500.337	615.026	130.373	0	99.1101	0	485.576	154.862	0	56.5387	443.15	4.00515	106.456	2.88638	1001.83	0	0	2.75875	0	243.923	57.8996	1.11671	2.95563	0	0	0	0	0	0	0	0	0	0	0	0	0	0	0	0	0	0	0	0	0	0
APC	chr5_112839455.0_112839474.0	603.992	339.485	1106.85	1089.37	709.645	1620.15	8.51374	870.445	0	753.979	667	96.2182	221.394	1430.26	1.14433	2276.64	118.983	2.13685	2.48711	41.9605	7.35666	31.6618	63.3106	269.321	2346.22	7.88168	0	0	0	0	4.75406	0	0	0	0	0	0	0	0	0	0	0	0	0	0	0	0	0
APC	chr5_112840126.0_112840145.0	649.378	637.215	750.453	908.126	791.999	399.764	4.25687	1057.89	0	786.277	818.006	0	411.84	29.6798	0.572165	178.623	162.279	1.06843	14.0936	69.9342	10.1154	12.6647	564.332	225.165	1893.95	2.95563	0	0	0	0	0	0	0	0	0	0	0	0	0	0	0	0	0	0	0	0	0	0
APC	chr5_112841123.0_112841142.0	1169.58	1589.41	1134.05	1129.86	1173.98	1414.74	4.25687	633.443	0	1789.73	1321.79	0	1905.65	74.1995	8.01031	1074.93	1778.33	69.4477	134916	2461.68	182.997	1177.82	1279.71	277.216	7195.55	413.788	0	0	0	0	0	0	0	0	1.27605	0	0	0	0	0	0	0	0	0	0	0	0	0
APOB	chr2_21006648.0_21006667.0	404.116	556.429	554.471	525.402	682.486	197.461	0	695.925	0	506.736	438.241	0	92.8425	384.302	4.57732	76.1539	139.829	3.91756	1.65807	41.9605	4.59791	56.9912	281.202	2826.26	6.70029	99.5062	0	0	0	0	0	0	0	0	0	0	0	0	0	0	0	0	0	0	0	0	0	0
APOB	chr2_21008298.0_21008317.0	142.27	39.9394	138.095	125.325	230.416	15.5618	0	101.265	0	142.554	173.497	0	14.8786	46.0548	0	2.39227	7.05559	0	0	0	0	0	85.164	0.292422	0	0	0	0	0	0	0	0	0	0	0	0	0	0	0	0	0	0	0	0	0	0	0	0
APOB	chr2_21008871.0_21008890.0	336.909	381.24	225.973	357.659	350.442	61.2096	0	32.3185	0	160.374	258.96	0	232.701	1.53516	1.14433	14.7523	22.4496	0	0	0	0	0	26.9954	4.67876	0	0	0	0	0	0	0	0	0	0	0	0	0	0	0	0	0	0	0	0	0	0	0	0
APOB	chr2_21009829.0_21009848.0	755.862	713.463	539.127	623.734	663.212	402.185	4.25687	887.681	0	1463.41	168.356	0	358.277	23.5391	1309.11	125.594	371.06	82.625	55.9599	55.9473	2.75875	18.9971	295.985	7.31056	4.46686	41.3788	0	0	0	0	0	0	0	0	0	0	0	0	0	0	0	0	0	0	0	0	0	0
APOB	chr2_21015091.0_21015110.0	890.277	679.878	698.842	723.03	579.982	736.244	12.7706	633.443	0	555.74	974.796	0	626.092	628.905	4.00515	121.208	110.003	4434.68	1.24355	83.921	8.27625	25.3294	222.712	82.4631	5.02522	3.94084	0	0	0	0	0	0	0	0	0	0	0	0	0	0	0	0	0	0	0	0	0	0
APOB	chr2_21032346.0_21032365.0	1098.88	1670.19	1049.66	845.463	957.583	976.241	4.25687	1118.94	0	708.317	1012.71	0	1030.79	7.67581	4.57732	741.205	496.457	2261.15	2.07259	83.921	3.67833	37.9941	786.401	673.449	5.02522	6.89647	0	0	0	0	0	0	0	0	0	0	0	0	0	0	0	0	0	0	0	0	0	0
APOD	chr3_195568982.0_195569001.0	776.81	564.598	834.845	733.635	1048.7	223.744	8.51374	639.906	0	1195.01	753.106	0	291.026	421.658	4.57732	189.787	79.8565	1513.6	1.24355	125.882	6.43708	37.9941	2984.28	33.3362	12.2839	28.5711	0	0	0	0	0	0	0	0	0	0	0	0	0	0	0	0	0	0	0	0	0	0
APOD	chr3_195569108.0_195569127.0	472.196	422.995	658.39	478.164	475.725	291.524	0	260.703	0	400.934	233.257	962.182	551.104	102.344	20.0258	77.7487	32.3916	0.712284	0.414518	41.9605	3.67833	18.9971	99.6258	561.159	1.11671	1807.86	2.36721	4.60887	0	0	0	5.46598	2.6809	0	0	12.1531	0	0	0	0	0	0	0	0	0	0	0	0
APOD	chr3_195571338.0_195571357.0	467.832	138.88	289.441	164.851	327.663	448.179	0	23.7002	0	81.3006	417.678	0	123.79	0.511721	0	15.151	0.962126	1.42457	0.414518	55.9473	0	37.9941	115.052	1638.15	6.14193	2.95563	0	0	0	0	0	0	0	0	0	0	0	0	0	0	0	0	0	0	0	0	0	0
APOD	chr3_195573859.0_195573878.0	158.853	270.499	158.321	217.873	259.327	86.8	0	87.619	0	294.018	83.5356	0	80.9396	33.7736	0	82.1346	5.45205	0	0	0	0	12.6647	4.17786	2.6318	0	0.985209	2.36721	0	0	0	0	5.46598	2.6809	0	3139.09	6.07657	0	0	0	0	0	0	0	0	0	0	0	0
APOD	chr3_195573959.0_195573978.0	751.498	670.801	460.315	370.191	464.336	265.587	4.25687	464.668	0	315.179	381.693	0	179.138	108.485	116.722	1171.02	1002.21	2.13685	0.414518	27.9737	2.75875	25.3294	229.461	99.4236	1.11671	450.241	0	0	0	0	0	0	0	0	0	0	0	0	0	0	0	0	0	0	0	0	0	0
APOD	chr3_195579349.0_195579368.0	555.987	552.798	511.229	481.056	688.619	38.0399	0	296.612	0	614.766	468.442	0	179.734	72.1526	0.572165	9.96779	53.5584	0	0	0	0	0	0	23.6862	0	0	0	0	0	0	0	0	0	0	0	0	0	0	0	0	0	0	0	0	0	0	0	0
AQP7	chr9_33385746.0_33385765.0	430.3	206.051	619.333	648.799	197.124	1779.92	0	201.093	0	457.733	153.577	0	97.6037	353.087	0	625.977	303.711	1.42457	0	55.9473	3.67833	0	22.4962	0.877267	5.58357	9.85209	0	0	0	0	0	0	0	0	0	0	0	0	0	0	0	0	0	0	0	0	0	0
AQP7	chr9_33386405.0_33386424.0	8.7282	0	359.883	581.316	62.2035	86.1084	0	11.491	0	16.7056	8.35356	0	20.2349	193.942	0	1.19613	0.320709	0	0	0	0	0	1.60687	35.0907	0	0	0	0	0	0	0	0	0	0	0	0	0	0	0	0	0	0	0	0	0	0	0	0
AQP7	chr9_33386433.0_33386452.0	141.397	78.9711	510.531	573.604	195.372	131.41	0	109.883	0	42.3208	115.022	0	2.38058	1.02344	0	5.18325	17.639	0	0.829035	13.9868	0	0	32.7801	0.292422	0	0	0	0	0	0	0	0	0	0	0	0	0	0	0	0	0	0	0	0	0	0	0	0
AQP7	chr9_33386473.0_33386492.0	562.969	1021.18	636.072	428.998	594.876	477.573	4.25687	844.59	0	349.704	951.021	0	441.597	20.9805	0.572165	499.187	520.831	875.397	632.968	13.9868	4.59791	31.6618	3.21374	760.298	3.9085	2.95563	0	0	0	0	0	0	0	0	0	0	0	0	0	0	0	0	0	0	0	0	0	0
AQP7	chr9_33386495.0_33386514.0	705.239	546.444	297.81	540.827	437.177	315.731	0	302.358	0	428.777	299.443	0	633.233	148.399	2.28866	928.599	240.532	0.712284	102.8	27.9737	0.919583	12.6647	10.9267	0.877267	1.11671	1087.67	0	0	0	0	0	0	0	0	0	0	0	0	0	0	0	0	0	0	0	0	0	0
AQP7	chr9_33395131.0_33395150.0	391.896	398.486	433.115	571.676	304.009	117.232	0	926.464	0	2013.58	997.287	0	496.945	0	1.71649	56.617	33.6744	0	0	13.9868	0	12.6647	43.0641	86.557	0	16.7486	0	0	0	0	0	0	0	0	0	0	0	0	0	0	0	0	0	0	0	0	0	0
AR	chrX_67545523.0_67545542.0	217.332	223.298	381.504	424.178	448.566	89.2208	0	532.178	0	56.799	170.284	0	110.102	8.18753	2.28866	106.456	19.8839	0	0	0	0	0	19.9252	0.877267	0	0.985209	0	0	0	0	0	0	0	0	0	0	0	0	0	0	0	0	0	0	0	0	0	0
AR	chrX_67545686.0_67545705.0	247.008	428.441	366.16	393.328	438.929	145.243	0	25.8548	0	148.123	217.193	0	238.058	0	0.572165	91.7036	11.5455	0	0	0	1.83917	0	8.99846	14.3287	0	130.048	0	0	0	0	0	0	0	0	0	0	0	0	0	0	0	0	0	0	0	0	0	0
AR	chrX_67545905.0_67545924.0	362.22	313.161	374.529	386.58	375.849	300.169	4.25687	384.949	0	417.64	534.628	0	148.191	5.11721	1.14433	198.558	17.3183	1.06843	0	13.9868	0	0	66.203	344.181	1.11671	0	0	0	0	0	0	0	0	0	0	0	0	0	0	0	0	0	0	0	0	0	0	0
AR	chrX_67546068.0_67546087.0	394.515	389.409	287.348	234.262	287.363	31.1235	0	272.912	0	350.818	215.265	0	445.763	292.192	2.28866	5.98067	8.33843	0	0	0	0	0	12.5336	0	0	0	0	0	0	0	0	0	0	0	0	0	0	0	0	0	0	0	0	0	0	0	0	0
AR	chrX_67546295.0_67546314.0	1221.08	1172.77	780.444	826.182	741.185	1049.55	17.0275	1061.48	0	622.562	1718.26	0	339.827	50.6603	5.14948	1418.62	652.001	1.06843	83.318	69.9342	2.75875	18.9971	166.15	78.6616	0.558357	2.95563	0	0	0	0	0	0	0	0	0	0	0	0	0	0	0	0	0	0	0	0	0	0
AR	chrX_67546641.0_67546660.0	376.186	401.21	384.294	366.335	332.92	282.532	0	180.265	0	295.132	285.306	0	21.4252	150.958	0.572165	680.202	304.032	0.356142	0.829035	13.9868	0.919583	6.33235	498.772	44.4482	0	0	2.36721	4.60887	3.9495	8.66373	0	10.932	0	0	1.27605	0	0	0	0	0	0	0	0	0	0	0	0	0
ARHGAP20	chr11_110580935.0_110580954.0	994.142	599.091	644.441	626.626	582.61	373.482	0	621.233	0	1082.52	476.153	0	240.438	219.016	1.14433	192.578	130.849	0.356142	0.829035	0	0	0	11.8908	29.2422	0	0	0	0	0	0	0	0	0	0	0	0	0	0	0	0	0	0	0	0	0	0	0	0
ARHGAP20	chr11_110581118.0_110581137.0	487.907	475.642	304.087	271.859	299.628	40.8064	0	206.838	0	130.304	635.513	0	152.952	3.07032	0	4.78454	6.73488	0	0	0	0	0	84.8426	2.04696	0	0.985209	0	0	0	0	0	0	0	0	0	0	0	0	0	0	0	0	0	0	0	0	0	0
ARHGAP20	chr11_110583692.0_110583711.0	636.286	964.9	417.074	421.286	565.964	500.051	0	463.95	0	730.591	1098.17	0	259.483	3.07032	0	1372.76	231.872	3464.91	2.07259	97.9078	7.35666	25.3294	66.203	191.244	1.67507	2.95563	0	0	0	0	0	0	0	0	0	0	0	0	0	0	0	0	0	0	0	0	0	0
ARHGAP20	chr11_110592043.0_110592062.0	1317.09	628.138	1088.02	879.205	1314.16	3173.56	4.25687	782.826	0	1663.88	1476.01	0	908.19	62.4299	2.86082	8263.29	1137.87	7.47898	6.21776	237.776	10.1154	151.976	1470.61	180.425	3828.66	745.804	0	0	0	0	0	0	0	0	0	0	0	0	0	0	0	0	0	0	0	0	0	0
ARHGAP20	chr11_110606626.0_110606645.0	403.243	202.42	322.918	584.208	465.212	116.886	4.25687	134.301	0	306.269	115.022	0	608.833	69.0823	2.28866	33.8905	811.393	0	0.414518	0	0.919583	0	6.42747	107.611	1.11671	0	0	0	0	0	0	0	0	0	0	0	0	0	0	0	0	0	0	0	0	0	0	0
ARHGAP20	chr11_110630668.0_110630687.0	1766.59	1135.55	882.271	679.648	854.203	1293.36	8.51374	829.508	0	1128.18	831.501	3752.51	1702.11	352.064	65.799	371.998	1102.6	554.157	2.07259	83.921	6.43708	12.6647	1180.41	166.681	1.67507	8.86689	0	0	0	0	0	0	0	0	0	0	0	0	0	0	0	0	0	0	0	0	0	0
ARHGAP36	chrX_131083180.0_131083199.0	455.612	1223.6	548.891	616.986	601.884	352.733	4.25687	235.566	0	74.6183	494.145	0	141.644	152.493	327.85	229.259	155.544	1864.4	31.0888	41.9605	3.67833	31.6618	743.98	66.6723	2.79179	4.92605	2.36721	4.60887	0	5497.14	9.50812	0	0	4.52694	0	0	0	0	0	0	0	0	0	0	0	0	0	0
ARHGAP36	chrX_131083794.0_131083813.0	444.266	236.006	434.51	428.998	245.31	336.48	0	140.047	0	259.494	236.47	0	141.049	267.63	7.43814	289.464	49.0684	3977.04	39.7937	69.9342	3.67833	37.9941	52.3839	4.38634	1.67507	39.4084	0	0	0	0	0	0	0	0	0	0	0	0	0	0	0	0	0	0	0	0	0	0
ARHGAP36	chrX_131083942.0_131083961.0	653.743	636.307	838.332	639.159	797.256	797.8	12.7706	416.55	0	490.031	622.019	0	264.839	180.126	0	171.446	272.282	0.356142	0.414518	0	0.919583	6.33235	20.5679	13.159	0.558357	0.985209	0	0	0	0	0	0	0	0	0	0	0	0	0	0	0	0	0	0	0	0	0	0
ARHGAP36	chrX_131084652.0_131084671.0	808.232	739.787	639.559	723.994	889.247	396.998	8.51374	761.28	0	449.937	170.927	0	344.589	181.661	77.8144	110.443	420.128	0.712284	0	27.9737	2.75875	25.3294	1072.42	630.463	4.46686	23.645	0	0	0	0	0	0	0	0	0	0	0	0	0	0	0	0	0	0	0	0	0	0
ARHGAP36	chrX_131084990.0_131085009.0	804.74	468.38	847.399	910.054	1046.95	247.605	0	183.856	0	433.232	325.789	0	371.965	123.325	1.14433	314.185	56.4447	0	68.8099	0	2.75875	12.6647	488.488	128.666	1.67507	71.9203	0	0	0	0	0	0	0	0	0	0	0	0	0	0	0	0	0	0	0	0	0	0
ARHGAP36	chrX_131086055.0_131086074.0	569.079	702.571	698.842	947.651	814.778	577.168	0	299.485	0	886.51	587.32	0	1413.47	171.938	9.15464	447.753	162.92	339.403	4.14518	125.882	7.35666	25.3294	1222.18	1005.93	3.35014	6029.48	0	0	0	0	0	0	0	0	0	0	0	0	0	0	0	0	0	0	0	0	0	0
ARHGAP5	chr14_32090987.0_32091006.0	352.619	446.595	532.152	372.119	875.229	410.485	0	843.872	0	711.658	537.198	0	473.14	0.511721	6.29381	126.79	844.105	0.356142	0.829035	0	0.919583	18.9971	15.1046	3.50907	0.558357	1.97042	0	0	0	0	0	0	0	0	0	0	0	0	0	0	0	0	0	0	0	0	0	0
ARHGAP5	chr14_32091988.0_32092007.0	210.35	357.639	267.82	299.816	311.894	58.4431	0	7.18189	0	278.427	109.239	0	531.464	143.282	20.5979	161.877	7.05559	400.66	0	0	0	0	48.206	10.5272	0	0	0	0	0	0	0	0	0	0	0	0	0	0	0	0	0	0	0	0	0	0	0	0
ARHGAP5	chr14_32092623.0_32092642.0	788.157	394.856	774.167	891.737	922.539	3236.85	0	884.809	0	740.615	265.386	0	1177.2	89.0394	42.3402	354.853	60.6139	2.84914	2.90162	55.9473	3.67833	37.9941	279.916	31.5816	1.11671	4.92605	0	0	0	0	0	0	0	0	0	0	0	0	0	0	0	0	0	0	0	0	0	0
ARHGAP5	chr14_32093022.0_32093041.0	553.368	1003.93	750.453	529.258	691.247	364.145	4.25687	843.154	0	1657.2	244.181	0	370.18	255.349	0.572165	249.195	537.508	1.42457	1.24355	41.9605	5.5175	44.3265	17.6755	1056.23	1.11671	0.985209	0	0	2158.4	0	4.75406	5.46598	0	0	0	6.07657	0	0	0	0	0	0	0	0	0	0	0	0
ARHGAP5	chr14_32093435.0_32093454.0	645.887	668.077	424.745	366.335	301.38	545.353	0	917.845	0	158.146	751.82	0	438.621	250.743	1.71649	1529.46	305.956	2.49299	0.414518	153.855	5.5175	18.9971	2749.35	66.0875	1.67507	3.94084	0	0	0	0	0	0	0	0	0	0	0	0	0	0	0	0	0	0	0	0	0	0
ARHGAP5	chr14_32093783.0_32093802.0	422.445	255.975	477.751	369.227	279.478	114.12	4.25687	244.902	0	187.103	179.923	0	324.949	154.54	838.794	135.961	242.776	2389	18.2388	27.9737	5.5175	12.6647	71.6663	563.206	3.9085	668.957	0	0	0	0	0	0	0	0	0	0	0	0	0	0	0	0	0	0	0	0	0	0
ARID1A	chr1_26696998.0_26697017.0	799.504	730.71	1782.68	1648.51	1053.08	1101.77	12.7706	802.935	0	2785.38	2188.63	0	1484.88	1893.88	62.366	1007.94	552.26	678.451	14.9226	69.9342	5.5175	37.9941	1427.86	96.7918	1.11671	79.802	0	0	0	0	0	0	0	0	0	0	0	0	0	0	0	0	0	0	0	0	0	0
ARID1A	chr1_26731177.0_26731196.0	921.698	446.595	1925.65	2053.41	1090.75	2246.08	0	1884.53	0	1314.17	936.884	0	2465.09	142.258	10.299	2435.73	757.514	989.007	174.512	111.895	13.7937	44.3265	1247.57	390.092	2.79179	43.3492	0	0	0	0	0	0	0	0	0	0	0	0	0	0	0	0	0	0	0	0	0	0
ARID1A	chr1_26732722.0_26732741.0	732.296	996.67	1092.9	679.648	805.141	686.792	17.0275	1071.54	0	1039.09	1389.9	0	1177.2	588.99	27.4639	337.31	2589.72	2.49299	2.07259	0	6.43708	12.6647	86.7709	116.969	1.67507	2.95563	0	0	0	0	0	0	0	0	0	0	0	0	0	0	0	0	0	0	0	0	0	0
ARID1A	chr1_26763184.0_26763203.0	1664.47	1791.83	2165.57	1634.05	1219.54	3349.24	21.2843	1876.63	0	1638.26	1609.67	0	1513.45	2422.48	84.6804	7352.64	8925	9.61584	7.0468	405.618	22.07	151.976	770.654	1524.98	17.8674	6598.93	0	0	0	0	0	0	0	0	0	0	0	0	0	0	0	0	0	0	0	0	0	0
ARID1A	chr1_26771227.0_26771246.0	1068.33	959.454	1157.07	911.982	784.114	1091.74	12.7706	1691.33	0	3471.42	708.767	0	1734.85	884.765	57.7887	638.337	1728.3	3.91756	5.38873	139.868	12.8742	82.3206	183.504	1834.66	6069.35	2829.52	2764.9	0	0	0	0	0	0	4.52694	0	0	0	0	0	0	0	0	0	0	0	0	0	0
ARID1A	chr1_26771262.0_26771281.0	1045.64	629.953	1722.7	1517.4	1475.36	910.882	12.7706	2028.88	0	494.486	1156.65	0	887.955	2202.45	1.71649	669.436	908.247	307.707	547.578	13.9868	6.43708	37.9941	654.959	255.87	3.35014	16.7486	0	0	0	0	0	0	0	0	0	0	0	0	0	0	0	0	0	0	0	0	0	0
ARID1B	chr6_156778608.0_156778627.0	81.1723	98.9408	225.276	184.132	86.7344	4.1498	0	2689.62	0	106.916	105.383	0	39.8747	0.511721	0	1.99356	8.97984	0.356142	0.414518	0	0	0	6.42747	162.294	0	0	0	0	0	0	0	0	0	0	0	0	0	0	0	0	0	0	0	0	0	0	0	0
ARID1B	chr6_156829262.0_156829281.0	552.495	565.506	991.77	899.449	1178.36	2005.74	0	891.991	0	455.506	854.633	0	608.833	716.409	1.14433	2244.35	239.89	2216.63	2.07259	97.9078	6.43708	18.9971	630.856	725.792	2.23343	25.6154	0	0	0	0	0	0	0	0	0	0	0	0	0	0	0	0	0	0	0	0	0	0
ARID1B	chr6_157084690.0_157084709.0	494.016	332.223	958.99	742.311	1018.03	1025.35	8.51374	1557.75	0	807.437	619.449	0	1105.78	438.033	98.9845	3055.33	74.7251	1876.51	2.48711	69.9342	5.5175	37.9941	378.899	258.209	2.79179	18.719	0	0	0	0	0	0	0	0	0	0	0	0	0	0	0	0	0	0	0	0	0	0
ARID1B	chr6_157184229.0_157184248.0	97.7559	167.927	87.8784	64.5907	233.044	1.38327	0	8.61827	0	17.8193	17.9923	0	34.5184	773.21	0	41.0673	0.320709	0	0.829035	13.9868	0	0	0.321374	0.292422	159.69	0	0	0	0	0	0	0	0	0	0	0	0	0	0	0	0	0	0	0	0	0	0	0
ARID1B	chr6_157184341.0_157184360.0	564.715	584.568	708.607	629.518	353.071	910.882	0	555.16	0	1419.98	688.847	0	1328.36	32.2384	6.86598	549.026	22.1289	4.27371	0.829035	27.9737	0.919583	18.9971	82.2716	119.601	1.11671	30.5415	0	0	0	0	0	0	0	0	0	0	0	0	0	0	0	0	0	0	0	0	0	0
ARID1B	chr6_157207306.0_157207325.0	379.677	527.382	704.422	610.237	365.336	306.394	0	364.122	0	589.151	178.638	0	146.405	220.552	2.86082	600.061	12.1869	138.539	1.24355	167.842	10294.7	50.6588	616.073	1125.83	10.0504	888.659	0	0	0	0	0	0	0	0	0	0	0	0	0	0	0	0	0	0	0	0	0	0
ARID2	chr12_45817854.0_45817873.0	672.072	513.766	721.161	710.498	579.982	631.462	4.25687	5058.2	0	502.282	888.048	0	527.298	85.4573	312.974	253.58	300.183	95.4461	0.414518	27.9737	0.919583	6.33235	424.856	40.9391	0.558357	10.8373	0	0	0	0	0	0	0	0	0	0	0	0	0	0	0	0	0	0	0	0	0	0
ARID2	chr12_45849595.0_45849614.0	1312.72	860.513	1329.33	1602.23	1038.19	1246.67	0	652.834	0	3230.86	1488.86	0	705.841	127.93	153.912	854.439	1234.09	1.06843	0.829035	41.9605	2.75875	25.3294	270.597	187.443	6.14193	6.89647	0	0	0	0	0	0	0	0	0	0	0	0	0	0	0	0	0	0	0	0	0	0
ARID2	chr12_45849649.0_45849668.0	382.295	422.087	636.072	538.898	402.132	198.153	0	1281.97	0	1436.68	90.604	0	285.669	68.5706	0.572165	260.359	134.698	1.42457	12.4355	111.895	2.75875	6.33235	72.9518	1699.85	1.67507	9.85209	0	0	0	0	0	0	0	0	0	0	0	0	0	0	0	0	0	0	0	0	0	0
ARID2	chr12_45850351.0_45850370.0	550.75	624.507	638.164	659.403	656.203	404.606	21.2843	479.032	0	214.945	1075.68	0	273.171	436.498	13.732	165.864	580.162	2.84914	0.414518	41.9605	4.59791	25.3294	429.998	943.355	10.0504	1932	0	0	0	0	0	0	0	0	0	0	0	0	0	0	0	0	0	0	0	0	0	0
ARID2	chr12_45850674.0_45850693.0	1134.67	1298.03	1309.11	903.306	984.743	730.02	0	2801.65	0	1451.16	761.459	0	1264.09	274.794	18406	619.199	173.503	11177.2	70.8825	251.763	22.9896	41103.3	288.915	743.338	280.854	135.959	0	0	0	0	0	0	0	0	0	0	0	0	0	0	0	0	0	0	0	0	0	0
ARID2	chr12_45891811.0_45891830.0	893.768	935.853	1179.38	1579.1	1110.9	1767.12	0	295.894	0	781.822	1361.63	0	1195.64	274.282	10.8711	654.285	4353.3	306.994	142.594	209.803	24.8287	183.638	407.823	9675.97	542.723	114.284	0	0	0	0	0	0	0	0	0	0	0	0	0	0	0	0	0	0	0	0	0	0
ASPA	chr17_3476239.0_3476258.0	275.811	426.626	453.341	356.695	117.398	110.661	4.25687	129.992	0	363.068	246.109	0	451.119	81.3636	0.572165	9.56907	101.665	394.605	0.414518	13.9868	0.919583	18.9971	831.072	57.6072	1.11671	282.755	0	0	0	0	0	0	0	0	0	0	0	0	0	0	0	0	0	0	0	0	0	0
ASPA	chr17_3481620.0_3481639.0	158.853	200.605	159.715	143.642	254.071	92.6789	0	50.9914	0	220.514	35.342	0	60.1096	143.793	0	40.6686	22.1289	0	0.414518	0	0.919583	12.6647	76.4869	426.352	0.558357	0.985209	0	0	0	0	0	0	0	0	0	0	0	0	0	0	0	0	0	0	0	0	0	0
ASPA	chr17_3481713.0_3481732.0	343.891	602.722	514.716	691.217	306.637	825.119	0	447.432	0	1022.38	476.153	0	939.138	1.02344	1.71649	5784.9	188.897	2.13685	1.24355	153.855	3.67833	31.6618	24.4244	17.5453	3.9085	1481.76	0	0	0	0	0	0	0	0	0	0	0	0	0	0	0	0	0	0	0	0	0	0
ASPA	chr17_3483513.0_3483532.0	323.816	285.022	331.288	393.328	357.451	213.715	4.25687	644.215	0	330.771	207.554	0	38.0892	148.911	37.1907	173.439	43.9371	6048.72	2.90162	139.868	7.35666	31.6618	11.8908	10.8196	3.35014	4.92605	0	0	0	0	0	0	0	0	0	0	0	0	0	0	0	0	0	0	0	0	0	0
ASPA	chr17_3483546.0_3483565.0	495.762	648.108	673.734	691.217	675.477	279.074	0	916.409	0	393.138	352.777	0	391.01	585.408	5.14948	141.543	77.9322	0.356142	0.414518	27.9737	0.919583	12.6647	570.76	174.284	0.558357	0.985209	0	0	0	0	0	0	0	0	0	0	0	0	0	0	0	0	0	0	0	0	0	0
ASPA	chr17_3489232.0_3489251.0	340.4	314.977	397.545	372.119	677.23	235.847	0	141.483	0	439.914	54.6194	0	152.357	294.751	80.1031	814.169	335.782	0	0.414518	41.9605	0.919583	6.33235	46.9205	270.491	0.558357	1.97042	0	0	0	4.33187	9.50812	0	2.6809	0	0	6.07657	0	0	0	0	0	0	0	0	0	0	0	0
ASTN1	chr1_176888103.0_176888122.0	140.524	111.649	141.582	175.455	265.46	96.8287	0	193.193	0	11.1371	370.127	0	25.5912	0	0	16.7459	136.943	0	0	13.9868	0	0	53.6694	0.292422	0	0.985209	0	0	0	0	0	0	0	0	0	0	0	0	0	0	0	0	0	0	0	0	0	0
ASTN1	chr1_176949265.0_176949284.0	380.55	397.579	373.134	299.816	113.018	276.999	0	151.538	0	453.279	82.2504	0	169.616	35.3087	0	112.835	23.091	0.356142	0	13.9868	1.83917	0	167.757	80.4162	1.11671	0	0	0	0	0	0	0	0	0	0	0	0	0	0	0	0	0	0	0	0	0	0	0
ASTN1	chr1_176965210.0_176965229.0	375.313	345.839	456.131	299.816	346.062	206.107	4.25687	242.03	0	207.149	323.861	0	236.272	29.6798	15.4485	304.616	116.417	2.49299	4.14518	111.895	8.27625	69.6559	2067.07	5.84845	2983.86	20.6894	0	0	0	0	0	0	0	0	0	0	0	0	0	0	0	0	0	0	0	0	0	0
ASTN1	chr1_177024640.0_177024659.0	869.329	499.243	804.157	747.131	1069.72	1619.11	8.51374	304.512	0	524.556	1148.94	0	219.608	964.081	4.57732	2724	863.669	11706.7	6.21776	377.645	17.4721	132.979	1240.82	543.613	16.1924	3285.67	0	0	0	0	0	0	0	0	0	0	0	0	0	0	0	0	0	0	0	0	0	0
ASTN1	chr1_177032474.0_177032493.0	195.512	253.252	326.405	374.048	383.734	163.917	0	100.546	0	130.304	235.827	0	18.4495	31.215	0	129.183	51.3134	0.356142	0	0	0	0	12.5336	36.5528	0	0	0	0	0	0	0	0	0	0	0	0	0	0	0	0	0	0	0	0	0	0	0	0
ASTN1	chr1_177032789.0_177032808.0	111.721	186.081	269.912	272.823	138.425	238.614	4.25687	18.6729	0	216.059	96.3872	0	126.171	0.511721	0	133.568	948.977	0.712284	0.414518	13.9868	2.75875	12.6647	121.479	334.239	0	0	0	0	0	0	0	0	0	0	0	0	0	0	0	0	0.934958	0	5.56661	6402.06	7.83953	0	0	0
ASXL1	chr20_32369027.0_32369046.0	1952.5	2197.58	1595.06	1435.46	1560.34	3346.47	12.7706	2654.43	0	3448.04	2141.08	0	758.809	837.175	1.14433	2771.04	10762.3	294.886	8.70487	223.789	15.6329	63.3235	2168.95	127.496	8.93372	1023.63	0	0	1.97475	0	14.2622	10.932	2.6809	6541.43	2.55211	0	0	0	0	0	0	0	0	0	0	0	0	0
ASXL1	chr20_32369046.0_32369065.0	525.438	384.871	389.873	184.132	593.123	256.25	4.25687	147.229	0	83.528	86.7485	0	91.0571	22.004	0	304.616	8.65914	0.712284	0	27.9737	0	6.33235	184.468	64.6254	0.558357	13.7929	0	0	0	0	0	0	0	0	0	0	0	0	0	0	0	0	0	0	0	0	0	0
ASXL1	chr20_32431320.0_32431339.0	1139.03	851.436	1227.51	1447.02	1076.73	773.938	21.2843	518.532	0	821.915	549.407	96.2182	1079	35.3087	44.6289	196.963	502.23	5.34213	1.24355	111.895	8.27625	56.9912	172.256	735.442	4067.08	172.412	0	0	710.911	4.33187	0	0	0	0	0	0	1189.44	0	2.264	2.67844	0	5.12479	2.7833	9.6344	0	0	2.95957	0
ASXL1	chr20_32433369.0_32433388.0	1113.72	1211.8	1267.96	1407.5	1696.14	1755.71	4.25687	857.518	0	802.982	1078.89	0	1378.35	247.161	4.00515	1448.92	2052.22	1032.46	4.55969	83.921	6.43708	56.9912	597.434	416.702	1.67507	19.7042	0	0	0	0	0	0	0	0	0	0	0	0	0	0	0	0	0	0	0	0	0	0
ASXL1	chr20_32434439.0_32434458.0	701.748	723.448	1055.94	1247.47	891.875	1566.55	4.25687	1210.87	0	877.601	434.385	0	567.768	400.165	2.28866	629.964	391.906	0.712284	1.65807	27.9737	1.83917	25.3294	172.578	132.175	2.23343	0	0	0	0	0	0	0	0	0	0	0	0	0	0	0	0	0	0	0	0	0	0	0
ASXL1	chr20_32434762.0_32434781.0	1106.74	670.801	1160.55	1008.39	733.3	1701.42	4.25687	425.886	0	814.119	554.548	0	176.163	507.115	4.57732	663.057	1140.12	3.91756	355.242	69.9342	2.75875	31.6618	80.022	76.0298	2.23343	8.86689	0	0	0	0	0	0	0	0	0	0	0	0	0	0	0	0	0	0	0	0	0	0
ATM	chr11_108244097.0_108244116.0	2960.61	3836	2100.71	1904.94	2617.8	1188.23	29.7981	2385.11	0	3044.87	2626.23	0	1425.97	2000.83	631.67	1867.17	3695.85	440.904	703.436	181.829	5.5175	63.3235	497.808	147.088	3.35014	83.7428	0	0	0	0	0	0	0	0	0	0	0	0	0	0	0	0	0	0	0	0	0	0
ATM	chr11_108250791.0_108250810.0	2639.41	2679.57	1851.72	1927.12	1674.24	3301.51	17.0275	1262.58	0	2934.62	2410.32	1924.36	3041.78	1511.62	10.8711	1225.64	1101.96	1108.31	21.5549	993.065	78.1646	493.923	700.594	115.214	6421.67	67637.6	0	0	0	0	0	0	0	0	0	0	0	0	0	0	0	0	0	0	0	0	0	0
ATM	chr11_108268524.0_108268543.0	1417.46	1321.63	2037.94	1896.27	1527.93	1229.03	12.7706	1460.08	0	1726.24	2262.53	0	849.866	232.833	15.4485	465.296	505.116	5.34213	269.851	237.776	21108.1	120.315	892.133	1101.85	680.638	50.2457	0	0	0	0	0	0	0	0	0	0	0	0	0	0	0	0	0	0	0	0	0	0
ATM	chr11_108272811.0_108272830.0	2719.71	2372.76	2143.95	2386	2567.87	4334.12	574.677	2460.52	0	2594.94	2270.88	0	1936	1636.48	35.4742	1746.75	2955.97	2.49299	2.90162	181.829	9.19583	75.9882	1789.41	2041.69	15.0757	53.2013	0	0	1.97475	4.33187	0	0	2.6809	3562.7	2.55211	0	0	0	0	0	0	666.222	0	0	0	0	0	0
ATM	chr11_108299853.0_108299872.0	167.582	62.6323	318.733	444.422	160.327	561.607	0	152.974	0	49.0031	53.9769	0	65.4659	60.383	1.14433	87.7165	195.953	1.78071	0.414518	41.9605	2.75875	6.33235	991.759	17.8378	0.558357	10.8373	0	0	0	0	0	0	0	0	0	0	0	0	0	0	0	0	0	0	0	0	0	0
ATM	chr11_108335020.0_108335039.0	865.838	1225.41	1268.66	1142.39	1851.21	293.253	17.0275	1587.92	0	3482.56	1130.94	0	1645.57	841.78	8.58247	388.345	746.931	120.732	1.65807	0	3.67833	18.9971	1075.64	222.533	12.2839	61.083	0	0	0	0	0	0	0	0	0	0	0	0	0	0	0	0	0	0	0	0	0	0
ATOH8	chr2_85754382.0_85754401.0	439.901	658.093	746.269	418.393	730.672	250.026	8.51374	341.14	0	373.092	127.874	0	800.469	54.2424	188.814	323.355	95.2505	1.78071	3.73066	195.816	12448.4	50.6588	155.223	382.196	5.02522	769.449	0	0	0	0	0	0	0	0	0	0	0	0	0	0	0	0	0	0	0	0	0	0
ATOH8	chr2_85754505.0_85754524.0	631.049	592.737	715.581	717.246	833.176	1211.4	336.293	266.448	0	405.389	476.796	0	1584.87	450.826	59.5051	618.401	1099.07	0.712284	153.372	27.9737	0	37.9941	312.375	18.4226	2.23343	3.94084	0	0	0	0	0	0	0	0	0	0	0	0	0	0	0	0	0	0	0	0	0	0
ATOH8	chr2_85754749.0_85754768.0	479.178	572.767	709.304	682.54	370.593	218.21	0	154.411	0	256.152	274.382	0	145.81	201.618	90.9742	33.093	52.2755	0.356142	0	0	0	6.33235	73.9159	42.6937	0	28.5711	0	0	0	0	0	0	0	0	0	0	0	26.7876	0	0	0	0	0	4.8172	6441.48	0	0	0
ATOH8	chr2_85754811.0_85754830.0	630.176	799.696	777.654	517.69	949.698	426.738	4.25687	242.03	0	462.188	921.462	0	417.791	614.065	653.984	116.822	26.6188	41.3125	12.021	0	0.919583	6.33235	85.8067	92.1131	0.558357	0.985209	0	0	0	0	0	0	0	0	0	6.07657	0	0	0	0	0	0	0	0	0	0	5.91914	0
ATOH8	chr2_85754863.0_85754882.0	225.188	606.353	624.215	737.491	939.185	200.574	4.25687	48.1187	0	1571.44	798.086	0	146.405	4.09376	0	35.4853	82.7428	0.356142	0	0	0.919583	0	143.333	24.5635	0	653.194	0	0	0	0	0	0	0	0	0	0	0	0	0	0	0	0	0	0	0	0	0	0
ATOH8	chr2_85764112.0_85764131.0	89.0277	77.1557	428.233	612.165	241.805	531.866	0	229.102	0	207.149	190.204	0	50.5873	38.8908	0.572165	1075.72	47.1442	2.13685	1.24355	27.9737	3.67833	25.3294	30.2091	4.38634	1.67507	2251.2	0	4.60887	0	4.33187	0	5.46598	2.6809	0	2026.37	6.07657	0	0	0	0	0	0	0	0	0	0	0	0
ATP13A5	chr3_193289891.0_193289910.0	322.944	399.394	293.625	165.815	148.938	315.731	4.25687	155.129	0	248.357	147.151	0	150.571	1925.6	1.71649	264.346	39.7679	0	13.6791	27.9737	0.919583	6.33235	192.503	37.4301	0.558357	0.985209	0	0	0	0	0	0	0	0	0	0	0	0	0	0	0	0	0	0	0	0	0	0
ATP13A5	chr3_193319090.0_193319109.0	1415.71	989.408	737.899	681.576	801.637	375.211	4.25687	1340.14	0	836.394	152.934	0	248.175	91.598	0.572165	993.988	7059.76	5.69827	2.07259	83.921	11.035	37.9941	82.2716	81.8783	9.49208	4.92605	0	0	0	0	0	0	0	0	0	0	0	0	0	0	0	0	0	0	0	0	0	0
ATP13A5	chr3_193331119.0_193331138.0	807.359	967.623	895.522	507.085	666.716	586.16	0	499.141	0	982.289	294.945	0	1130.18	326.989	15573.2	488.82	560.278	3.91756	1789.47	83.921	9.19583	25.3294	542.479	165.804	2470.73	78.8168	0	0	0	0	0	0	0	0	0	0	0	0	0	0	0	0	0	0	0	0	0	0
ATP13A5	chr3_193343924.0_193343943.0	616.211	1094.7	1019.67	914.874	995.256	1011.86	21.2843	1590.07	0	522.328	947.165	0	999.842	355.134	425.118	300.628	78.5736	2.49299	2372.7	83.921	4.59791	44.3265	492.987	170.19	2.79179	37.438	0	0	0	0	0	0	0	0	0	0	0	0	0	0	0	0	0	0	0	0	0	0
ATP13A5	chr3_193345050.0_193345069.0	642.396	640.846	979.914	864.744	791.999	1105.58	0	208.993	0	766.23	535.913	0	686.796	677.518	2.28866	272.719	637.248	212.261	1.65807	55.9473	4.59791	6.33235	1495.03	44.1558	3.9085	4.92605	0	0	0	0	0	0	0	0	0	0	0	0	0	0	0	0	0	0	0	0	0	0
ATP13A5	chr3_193363311.0_193363330.0	754.117	637.215	463.803	543.719	428.416	220.285	8.51374	797.908	0	490.031	776.881	0	339.827	1.02344	0	88.1152	152.337	0	0	0	0.919583	0	14.4618	6.43329	0.558357	245.317	0	0	0	0	0	0	0	0	0	0	0	0	0	0	0	0	0	0	0	0	0	0
ATP1A2	chr1_160124402.0_160124421.0	312.47	190.62	587.251	608.309	391.619	210.948	0	222.639	7.26671	260.607	1006.93	0	281.503	3.58204	1.14433	78.5462	52.5962	13.5334	30592.6	671.368	1107.18	284.956	373.115	219.609	22.8927	40.3936	0	0	0	0	0	0	0	0	0	0	0	0	0	0	0	0	0	0	0	0	0	1.83908
ATP1A2	chr1_160127603.0_160127622.0	1133.79	740.695	945.739	807.866	1047.82	1608.74	0	849.617	0	831.939	1035.2	0	457.666	538.33	1.14433	606.839	3416.19	6.7667	3.73066	167.842	11.035	88.6529	119.872	5723.29	7.25865	50.2457	0	0	0	0	0	0	0	0	0	0	0	0	0	0	0	0	0	0	0	0	0	0
ATP1A2	chr1_160128804.0_160128823.0	659.852	436.61	583.763	735.563	532.672	471.694	8.51374	939.391	0	1248.46	358.561	0	214.847	35.8204	106.423	806.992	63.5003	86.5425	0.414518	13.9868	3.67833	18.9971	274.132	608.823	2.79179	1.97042	0	0	0	0	0	0	0	0	0	0	0	0	0	0	0	0	0	0	0	0	0	0
ATP1A2	chr1_160130459.0_160130478.0	580.426	505.597	410.099	527.33	359.203	84.0335	0	152.974	0	380.888	284.664	0	632.043	1.02344	1.14433	76.5526	26.6188	0	0.414518	13.9868	0.919583	0	250.993	52.0512	0	0.985209	0	0	0	0	0	0	0	0	0	0	0	0	0	0	0	0	0	0	0	0	0	0
ATP1A2	chr1_160135948.0_160135967.0	461.722	274.13	507.044	594.813	629.92	277.345	4.25687	153.692	0	1657.2	161.288	0	119.029	8.69925	8.01031	84.9255	21.1668	153.853	0.829035	13.9868	0.919583	6.33235	83.2358	4.97118	0.558357	0.985209	0	0	0	0	0	0	0	0	0	0	0	0	0	0	0	0	0	0	0	0	0	0
ATP1A2	chr1_160139705.0_160139724.0	662.471	462.934	426.14	515.761	425.787	369.332	4.25687	196.066	0	510.078	2614.66	0	119.624	272.747	0	2939.7	788.623	5.69827	7036.02	223.789	24.8287	94.9853	1780.73	11.4045	1787.86	37.438	0	0	0	0	0	0	0	0	0	0	0	0	0	0	0	0	0	0	0	0	0	0
ATP2B3	chrX_153536433.0_153536452.0	617.957	688.955	701.632	834.859	563.336	949.959	0	328.212	0	448.824	421.534	0	85.1056	49.6369	1.71649	106.456	530.773	1218.36	1.65807	69.9342	2.75875	18.9971	103.482	66.3799	3.35014	15.7634	0	0	0	0	0	16.398	0	9.05389	0	42.536	0	0	0	0	0	0	0	0	0	0	0	0
ATP2B3	chrX_153543087.0_153543106.0	895.514	796.973	884.363	825.218	883.114	228.931	4.25687	271.475	0	671.565	571.898	96.2182	605.857	1.02344	3.43299	47.0479	229.948	318.391	108.189	13.9868	0	0	35.9938	56.4375	1.67507	26.6007	0	0	0	0	0	0	0	0	0	0	0	0	0	0	0	0	0	0	0	0	0	0
ATP2B3	chrX_153549599.0_153549618.0	767.209	732.525	1177.99	1260.96	711.398	2948.09	0	667.197	0	655.973	577.681	0	187.47	187.29	41.768	772.703	811.393	110.404	1.65807	13.9868	3.67833	25.3294	926.199	88.3116	1.67507	8.86689	0	0	0	0	0	0	0	0	0	0	0	0	0	0	0	0	0	0	0	0	0	0
ATP2B3	chrX_153553051.0_153553070.0	299.377	153.404	466.592	482.984	601.008	558.494	0	47.4005	0	59.0264	415.108	0	174.377	47.0783	1.14433	40.2699	87.2328	0.712284	0.414518	13.9868	0.919583	12.6647	309.483	200.309	0.558357	2.95563	0	0	0	0	0	0	0	0	0	0	0	0	0	0	0	0	0	0	0	0	0	0
ATP2B3	chrX_153556390.0_153556409.0	244.39	265.052	352.908	316.205	319.779	1161.25	0	527.869	0	322.975	50.7639	0	204.134	8.69925	1.14433	599.263	83.0636	1.42457	0.829035	83.921	2.75875	63.3235	968.941	1.75453	2.79179	2.95563	0	0	0	0	0	0	0	0	0	0	0	0	0	0	0	0	0	0	0	0	0	0
ATP2B3	chrX_153558243.0_153558262.0	1002.87	814.219	811.131	651.691	810.398	1679.98	8.51374	575.269	0	299.587	1018.49	0	386.249	4245.23	10.8711	1158.26	5417.41	238.971	761.883	111.895	13.7937	56.9912	604.182	134.807	12.2839	23.645	0	0	0	0	0	0	0	0	0	0	0	0	0	0	0	0	0	0	0	0	2.95957	0
ATR	chr3_142512342.0_142512361.0	1632.17	1114.67	1690.61	1563.67	1138.06	2302.1	12.7706	1251.8	0	1359.84	1139.3	0	855.817	897.046	8.01031	5211.96	800.489	8.90355	75.4422	363.658	26.6679	177.306	6982.48	357.633	9.49208	13669.8	0	0	0	0	0	0	0	0	0	0	0	13.3938	0	1.33922	1.86992	2.56239	6248.52	4.8172	0	4920.1	2.95957	0
ATR	chr3_142519721.0_142519740.0	1214.09	1180.03	1816.15	2141.13	1724.18	1308.23	4.25687	425.886	0	1957.9	1405.33	0	441.002	1.02344	244.887	472.473	1222.54	1.78071	1.65807	55.9473	0.919583	37.9941	86.4495	33.921	6.14193	20.6894	0	0	0	0	0	0	0	0	0	0	0	0	0	0	0	0	0	0	0	0	0	0
ATR	chr3_142550217.0_142550236.0	909.479	877.759	1204.49	989.105	1301.02	1448.63	8.51374	918.564	0	478.894	14079.6	0	707.031	701.569	3.43299	1617.97	31.7502	1.78071	2.48711	55.9473	4.59791	37.9941	483.667	1188.99	7.817	3.94084	0	0	0	0	0	0	0	0	0	0	0	0	0	0	0	0	0	0	0	0	0	0
ATR	chr3_142559252.0_142559271.0	590.899	1074.73	794.393	492.625	926.044	128.99	17.0275	865.418	0	474.439	1087.89	0	2177.04	2321.68	12.0155	109.646	342.517	447.671	10.3629	41.9605	8.27625	18.9971	671.992	413.485	752.666	383.246	0	0	0	0	0	0	0	0	0	0	0	0	0	0	0	0	0	0	0	0	0	0
ATR	chr3_142566158.0_142566177.0	620.575	496.519	571.209	497.445	527.416	130.373	4.25687	194.629	0	755.093	547.479	0	179.138	382.255	17.7371	10.3665	13.1491	0.356142	0.414518	0	0	0	73.2732	16.6681	0	0	0	0	0	0	0	0	0	0	0	0	0	0	0	0	0	0	0	0	0	0	0	0
ATR	chr3_142566200.0_142566219.0	416.335	483.811	823.685	863.78	426.663	491.406	0	346.885	0	154.805	328.359	0	79.7493	17.9102	6.29381	115.228	18.2804	0	0	13.9868	2.75875	0	20.2465	123.11	0	26.6007	0	0	0	0	0	0	0	0	0	0	0	0	0	0	0	0	0	0	0	0	0	0
ATRX	chrX_77522264.0_77522283.0	504.49	347.654	326.405	405.861	343.433	124.84	0	379.204	0	300.701	363.059	0	157.713	39.9142	1.71649	24.3214	181.2	0	0.414518	13.9868	0	6.33235	0	98.8388	0.558357	1.97042	0	0	0	0	0	0	0	0	0	0	0	0	0	0	0	0	0	0	0	0	0	0
ATRX	chrX_77557566.0_77557585.0	313.343	147.957	325.708	302.709	171.717	192.966	4.25687	132.865	0	247.243	91.8892	0	602.286	15.3516	3.43299	60.2054	34.3158	17.8071	12.021	321.697	29.4267	259.626	25723.4	55.8527	15.0757	112.314	0	0	0	0	0	0	0	0	0	0	0	0	0	0	0	0	0	0	0	0	0	0
ATRX	chrX_77634603.0_77634622.0	522.819	496.519	523.086	651.691	444.186	1051.98	4.25687	239.875	0	292.905	338.64	0	174.972	37.8673	1266.77	518.325	23.7324	4.98599	7.46132	265.75	22506.8	44.3265	456.029	200.017	8.93372	9.85209	0	0	0	0	0	0	0	0	0	0	0	0	0	0	0	0	0	0	0	0	0	0
ATRX	chrX_77682942.0_77682961.0	498.38	573.675	543.312	434.782	375.849	64.6678	8.51374	195.347	0	338.567	652.22	0	210.681	399.654	13.1598	31.4982	30.788	581.936	0.414518	27.9737	0.919583	0	3.21374	120.478	0	27.5859	0	0	0	0	0	0	0	0	0	0	0	0	0	0	0	0	0	0	0	0	0	0
ATRX	chrX_77684215.0_77684234.0	165.836	261.422	531.455	529.258	216.398	298.786	0	247.057	0	380.888	341.211	0	214.847	204.688	19.4536	258.365	295.052	0	0.414518	13.9868	2.75875	6.33235	5.78472	3.80149	0.558357	0	0	0	0	0	0	0	0	0	0	0	0	0	0	0	0	0	0	0	0	0	0	0
ATRX	chrX_77693825.0_77693844.0	479.178	324.962	161.11	155.21	197.124	11.0661	0	230.539	0	71.2772	163.216	0	393.985	2.5586	0.572165	6.77809	0	0	0.414518	0	0.919583	0	614.788	2.33938	0.558357	1.97042	0	0	0	0	0	0	0	0	0	0	0	0	0	0	0	0	0	0	0	0	0	0
AVPR2	chrX_153905725.0_153905744.0	577.807	518.305	674.432	701.821	896.256	422.588	3388.47	359.813	0	228.31	346.351	0	258.293	1000.93	647.691	58.2119	30.1466	128.211	0.829035	0	1.83917	6.33235	109.267	233.938	1.11671	29.5563	0	0	0	0	0	0	0	0	0	0	0	0	0	0	0	0	0	0	0	0	0	0
AVPR2	chrX_153905823.0_153905842.0	1317.09	1050.22	740.689	682.54	1174.86	589.964	4.25687	725.371	0	543.489	1034.56	0	147.001	129.977	4.57732	441.374	220.006	9.61584	1.24355	41.9605	3.67833	18.9971	361.545	130.42	0	28.5711	5075.3	4.60887	1.97475	0	4.75406	0	0	0	5.10422	6.07657	0	0	0	0	0	0	0	0	0	0	0	0
AVPR2	chrX_153905837.0_153905856.0	491.398	434.795	832.752	833.895	622.035	1302.35	4.25687	816.581	0	370.864	510.852	0	391.605	157.098	1.71649	553.013	65.1039	77.639	2.90162	41.9605	0	12.6647	164.222	212.884	1.11671	1.97042	0	0	0	0	0	0	0	0	0	0	0	0	0	0	0	0	0	0	0	0	0	0
AVPR2	chrX_153905885.0_153905904.0	756.735	540.09	753.243	550.467	972.477	890.479	4.25687	575.269	0	556.853	533.985	0	838.558	201.106	253.469	232.847	621.213	0.356142	1.24355	27.9737	1.83917	12.6647	164.865	138.316	0.558357	9.85209	0	0	0	0	0	0	0	0	0	0	0	0	0	0	0	0	0	0	0	0	0	0
AVPR2	chrX_153905944.0_153905963.0	1125.94	954.915	1177.99	1302.42	1134.56	1333.12	4.25687	611.897	0	929.945	733.828	0	758.214	20.4688	1.14433	408.679	407.3	373.949	1.65807	55.9473	4.59791	25.3294	157.152	690.702	2.23343	3.94084	0	0	0	0	0	0	0	0	0	0	0	0	0	0	0	0	0	0	0	0	0	0
AVPR2	chrX_153906157.0_153906176.0	789.03	620.876	750.453	678.684	551.946	666.735	8.51374	583.888	0	654.859	289.804	0	408.864	144.305	0	173.838	127.963	326.938	0.829035	41.9605	5.5175	18.9971	859.996	211.129	2.23343	4505.36	0	0	0	0	0	0	0	0	0	0	0	0	0	0	0	0	0	0	0	0	0	0
B3GALT1	chr2_167869091.0_167869110.0	504.49	350.378	440.787	482.02	406.513	805.062	4.25687	105.574	0	655.973	241.611	0	327.329	143.282	1.14433	702.131	24.3739	0.712284	0.829035	69.9342	0.919583	25.3294	812.754	14.9135	0.558357	1.97042	0	0	0	0	0	0	0	0	0	0	0	0	0	0	0	0	0	0	0	0	0	0
B3GALT1	chr2_167869392.0_167869411.0	398.006	656.277	752.546	725.922	985.619	783.621	0	203.247	0	384.229	285.306	0	341.613	2155.88	7.43814	452.139	857.575	2.49299	0.414518	27.9737	3.67833	6.33235	23.7816	133.345	0.558357	2.95563	0	0	0	0	0	0	0	0	0	0	0	0	0	0	0	0	0	0	0	0	0	0
B3GALT1	chr2_167869444.0_167869463.0	608.356	463.842	390.571	362.479	495	519.417	0	185.293	0	525.669	249.322	0	135.693	164.774	0.572165	85.3242	1338.32	4.62985	3.73066	97.9078	10.1154	88.6529	32.7801	2940.6	3579.07	24.6302	0	0	0	0	0	0	0	0	0	0	0	0	0	0	0	0	0	0	0	0	0	0
B3GALT1	chr2_167869494.0_167869513.0	231.297	320.423	173.664	172.563	219.902	98.5578	4.25687	85.4645	0	130.304	173.497	0	1046.26	512.744	3.43299	76.5526	1.28283	0	0	0	0	0	20.2465	15.7908	0	0	0	0	0	0	0	0	0	0	0	0	0	0	0	0	0	0	0	0	0	0	0	0
B3GALT1	chr2_167869620.0_167869639.0	750.626	1062.93	695.355	558.179	840.185	737.282	0	946.573	7.26671	780.708	996.644	0	934.376	6.14065	0.572165	610.826	624.42	162.757	119874	2335.8	188.515	1032.17	93.5197	187.735	81.5202	3647.25	4.73442	4.60887	1.97475	8.66373	19.0162	14326.3	2.6809	9.05389	3.82816	12.1531	0	0	0	0	0	0	0	0	7.83953	0	2.95957	1.83908
B3GALT1	chr2_167869775.0_167869794.0	546.386	550.982	705.817	678.684	456.451	550.886	0	277.221	0	287.336	332.215	0	270.791	142.258	0.572165	339.702	1568.91	1.78071	2.07259	27.9737	6.43708	25.3294	895.668	48.2497	1721.97	10.8373	0	0	0	0	0	0	0	0	0	0	0	0	0	0	0	0	0	0	0	0	0	0
BBOX1	chr11_27055448.0_27055467.0	603.119	477.457	751.848	867.636	530.044	786.388	17.0275	196.784	0	761.775	302.656	0	145.81	15.8633	1.14433	51.4338	280.941	206.562	0.414518	0	1.83917	12.6647	35.0297	16.9605	0.558357	7.88168	0	0	0	0	0	0	0	0	0	0	0	0	0	0	0	0	0	0	0	0	0	0
BBOX1	chr11_27055574.0_27055593.0	905.115	737.971	447.064	483.948	406.513	186.05	4.25687	313.849	0	488.917	568.042	0	679.06	207.247	188.242	42.6621	15.394	0	0	13.9868	0	0	23.7816	19.5923	0	0	0	0	0	0	0	0	0	0	0	0	0	0	0	0	0	0	0	0	0	0	0	0
BBOX1	chr11_27093231.0_27093250.0	285.412	511.043	442.182	543.719	924.291	592.73	4.25687	510.632	0	221.628	323.219	0	291.621	13.8165	3.43299	2349.61	129.246	2.49299	1.24355	13.9868	3.67833	31.6618	1777.2	14.6211	2.23343	16.7486	0	0	0	0	0	0	0	0	0	0	0	0	0	0	0	0	0	0	0	0	0	0
BBOX1	chr11_27115536.0_27115555.0	812.596	947.653	580.276	477.2	448.566	910.536	1047.19	550.851	0	463.302	524.347	0	904.619	0	1.71649	431.406	347.328	1427.06	1.24355	41.9605	3.67833	6.33235	132.727	9.35752	1.67507	6.89647	0	0	0	0	0	0	0	0	0	0	0.900405	0	2.264	0	0	0	0	4.8172	3911.93	0	0	0
BBOX1	chr11_27119667.0_27119686.0	522.819	799.696	491.7	565.892	608.893	220.631	4.25687	648.525	0	268.403	523.061	0	86.8911	202.13	0.572165	160.282	342.517	748.611	0.829035	41.9605	0.919583	6.33235	10.6053	19.5923	2.79179	1.97042	0	0	0	0	0	0	0	0	0	0	0	0	0	0	0	0	0	0	0	0	0	0
BBOX1	chr11_27119769.0_27119788.0	398.879	167.927	435.207	428.034	420.531	158.73	4.25687	618.361	0	380.888	749.25	0	305.904	14.8399	1399.52	187.394	21.8082	5.34213	519.391	83.921	3.67833	44.3265	1549.98	123.402	3983.32	56.1569	804.851	4.60887	0	0	0	0	0	0	0	0	0	0	0	0	0	0	0	0	0	0	0	0
BCOR	chrX_40057183.0_40057202.0	449.503	613.615	363.37	421.286	586.115	270.775	0	1206.56	0	133.645	988.29	0	698.699	58.3361	4.57732	18.7394	139.508	1.42457	0.414518	55.9473	1.83917	6.33235	713.449	684.268	1.67507	0	0	0	0	0	0	0	0	0	0	0	0	0	0	0	0	0	0	0	0	0	0	0
BCOR	chrX_40072437.0_40072456.0	883.294	993.947	401.73	437.674	606.265	283.224	8.51374	328.931	0	473.325	745.395	0	1536.66	25.586	5.72165	473.27	1163.21	0.356142	0.829035	55.9473	3.67833	6.33235	406.216	294.177	1.67507	19.7042	0	0	0	0	0	0	0	0	0	0	0	0	0	0	0	0	0	0	0	0	0	0
BCOR	chrX_40073205.0_40073224.0	1786.66	1589.41	1516.95	1713.1	2354.1	787.079	8.51374	1647.53	0	2149.45	2432.17	0	1962.19	545.494	44.6289	748.78	994.197	1262.88	54.3018	419.605	23585.5	126.647	2925.46	505.598	3479.68	4230.49	0	0	0	0	0	0	0	0	0	0	0	0	0	0	0	0	0	0	0	0	0	0
BCOR	chrX_40073550.0_40073569.0	1480.3	2044.17	952.713	794.369	1142.44	1241.48	8.51374	1015.52	0	936.627	2029.92	0	1227.19	1751.62	12.5876	618.401	122.19	329.431	2.48711	139.868	9.19583	56.9912	5042.35	27.4877	3.35014	10.8373	0	0	0	0	0	0	0	0	0	0	0	0	0	0	0	0	0	0	0	0	0	0
BCOR	chrX_40073728.0_40073747.0	377.931	453.857	511.229	561.071	441.557	667.427	8.51374	308.103	0	2207.37	900.257	0	161.284	449.291	1.14433	707.713	2979.7	1.06843	0.829035	13.9868	0.919583	44.3265	40.4931	30.9968	0	3.94084	0	0	0	0	0	0	0	0	0	0	0	0	0	0	0	0	0	0	0	0	0	0
BCOR	chrX_40075016.0_40075035.0	1005.49	1042.06	542.614	629.518	1017.16	576.477	4.25687	1590.79	0	616.993	1110.38	0	185.685	0	0	212.912	1608.03	1288.17	1.65807	27.9737	5.5175	44.3265	209.214	154.399	1.11671	3.94084	0	0	0	0	0	0	0	0	0	0	0	0	0	0	0	0	0	0	0	0	0	0
BCORL1	chrX_130013144.0_130013163.0	1988.28	2406.35	1981.45	1986.89	2666.87	2221.18	21.2843	2124.4	0	1842.07	1898.83	0	2332.37	974.828	7.43814	1796.99	1854.98	3981.67	141.351	195.816	11.035	75.9882	1200.65	356.171	6.70029	308.371	0	0	0	0	0	0	0	0	0	0	0	0	0	0	0	0	0	0	0	0	0	0
BCORL1	chrX_130013467.0_130013486.0	1647.88	1736.46	1661.32	2231.75	1297.51	949.959	25.5412	3615.36	0	3208.59	2505.43	0	1056.38	212.876	12.0155	2901.82	207.819	6.7667	5.38873	139.868	10.1154	63.3235	1199.69	125.157	6824.8	10.8373	0	0	0	0	0	0	0	0	0	0	0	0	0	0	0	0	0	0	0	0	0	0
BCORL1	chrX_130014116.0_130014135.0	757.608	219.667	933.882	1065.26	898.008	99.2495	0	640.624	0	1396.59	1295.44	0	789.756	326.989	4.57732	145.53	79.8565	0.356142	20.3114	13.9868	0	12.6647	88.3777	672.279	321.056	0.985209	0	0	0	0	0	0	0	0	0	0	0	0	0	0	0	0	0	0	0	0	0	0
BCORL1	chrX_130015217.0_130015236.0	764.591	616.338	567.722	660.367	526.539	1011.17	17.0275	1547.7	0	4114.03	1098.17	0	415.411	227.204	24.6031	1166.23	6139.01	4.27371	2.07259	83.921	7.35666	31.6618	687.418	103.518	5.58357	12.8077	0	0	0	0	0	0	0	0	0	0	0	0	0	0	0	0	0	0	0	0	0	0
BCORL1	chrX_130015332.0_130015351.0	3348.14	3595.45	2490.58	2365.75	3476.39	704.429	387.375	3305.11	0	3744.28	3054.83	0	1317.65	1382.16	3819.2	636.343	184.408	527.09	13.2646	195.816	7.35666	19611.3	5150.33	242.418	10.0504	49.2605	0	0	0	0	0	0	0	0	0	0	0	0	0	0	0	0	0	0	0	0	0	0
BCORL1	chrX_130039134.0_130039153.0	1194.89	945.838	1439.53	1354.48	1675.99	722.757	17.0275	2867.73	0	658.2	1494.64	0	633.233	298.333	5.14948	478.055	837.691	1.78071	3.31614	41.9605	3.67833	12.6647	771.939	736.612	1.11671	3.94084	0	0	0	0	0	0	0	0	0	0	0	0	0	0	0	0	0	0	0	0	0	0
BHMT2	chr5_79077591.0_79077610.0	693.892	1106.5	694.658	667.116	862.088	428.121	0	443.841	0	426.55	291.732	0	509.443	529.631	14094.1	207.729	470.8	2.84914	46.8405	55.9473	6.43708	15792.9	183.183	793.927	8.93372	2644.3	0	0	0	0	0	0	0	0	0	0	0	0	0	0	0	0	0	0	0	0	0	0
BHMT2	chr5_79080740.0_79080759.0	290.649	481.088	341.052	216.909	273.345	172.217	0	344.731	0	147.009	452.377	0	94.0328	3.07032	0	43.8583	8.65914	0.712284	0.414518	0	1.83917	0	2.57099	3.80149	0	0	0	0	0	0	0	0	0	0	0	0	0	0	0	0	0	0	0	0	0	0	0	0
BHMT2	chr5_79082853.0_79082872.0	756.735	682.601	502.162	390.436	618.53	97.1746	0	389.258	0	890.965	359.846	0	210.086	99.2738	0.572165	11.5626	184.087	2212.71	1.65807	69.9342	0	31.6618	12.5336	41.2316	2.23343	3.94084	0	0	0	0	0	0	0	0	0	0	0	0	2.264	2.67844	0	0	2.7833	4.8172	3109.68	142.918	0	0
BHMT2	chr5_79082923.0_79082942.0	475.687	139.788	348.724	381.76	242.681	288.411	4.25687	167.338	0	278.427	458.161	0	101.175	354.111	6.86598	45.0544	677.657	0.356142	0	0	0	6.33235	21.2107	0.877267	0.558357	1.97042	0	0	0	0	0	0	0	0	0	0	0	0	0	0	0	0	0	0	0	0	0	0
BHMT2	chr5_79083244.0_79083263.0	854.491	590.922	479.146	321.025	406.513	271.12	4.25687	443.123	0	1170.51	318.078	0	123.195	77.7815	0.572165	348.872	52.9169	0.712284	0.829035	0	0	0	217.891	0.292422	1.11671	8.86689	0	0	0	0	0	0	0	0	0	0	0	0	0	0	0	0	0	0	0	0	0	0
BHMT2	chr5_79083835.0_79083854.0	777.683	521.935	847.399	781.837	827.92	543.624	21.2843	1053.58	0	445.483	1822.36	0	1675.93	1151.37	14.8763	611.225	434.881	503.229	1.24355	27.9737	0	31.6618	871.244	239.202	1.11671	17.7338	0	0	0	0	0	0	0	0	0	0	0	0	0	0	0	0	0	0	0	0	0	0
BIRC6	chr2_32392090.0_32392109.0	595.264	241.452	505.649	502.265	358.327	473.078	0	616.206	0	703.862	2108.95	0	3824.4	642.721	12.5876	202.944	138.546	0	1.24355	13.9868	1.83917	6.33235	136.905	3.80149	1.11671	1637.42	0	0	0	0	0	0	0	0	0	0	0	0	0	0	0	0	0	0	0	0	0	0
BIRC6	chr2_32415451.0_32415470.0	343.891	360.362	537.034	625.662	360.079	255.905	0	142.92	0	164.829	332.857	0	346.969	73.176	1.71649	20.733	19.8839	0	0.414518	0	0	12.6647	2.89236	143.872	0	25.6154	0	0	0	0	0	0	0	0	0	0	0	0	0	0	0	0	0	0	0	0	0	0
BIRC6	chr2_32415549.0_32415568.0	333.417	236.006	430.325	435.746	468.716	534.633	4.25687	392.849	0	463.302	678.566	0	119.624	6.65237	0.572165	332.127	13.7905	0	0	41.9605	0.919583	6.33235	94.1625	1.46211	0	0	0	0	0	0	0	0	0	0	0	0	0	0	0	0	0	0	0	0	0	0	0	0
BIRC6	chr2_32416066.0_32416085.0	450.375	288.653	313.851	375.976	353.947	106.166	1447.34	163.747	0	1474.55	91.8892	0	64.8707	119.743	0	50.2376	0.320709	0	0	0	0	0	11.5694	1.46211	0	31.5267	0	0	0	0	0	0	0	0	0	0	0	0	0	0	0	0	0	0	0	0	0	0
BIRC6	chr2_32441371.0_32441390.0	360.475	258.698	444.971	462.739	312.77	49.7976	0	739.735	0	193.785	456.875	0	151.167	0	0.572165	25.9162	354.383	0	0	0	0.919583	12.6647	95.7693	33.0437	1.11671	0	0	0	0	0	0	0	0	0	0	0	0	0	0	0	0	0	0	0	0	0	0	0
BIRC6	chr2_32467589.0_32467608.0	683.418	1198.18	1012.69	968.86	909.398	588.926	4.25687	988.946	0	490.031	673.425	0	399.937	1044.42	8.58247	680.999	80.1772	1.06843	1.65807	13.9868	0	12.6647	224.962	132.175	1.11671	22.6598	0	0	0	0	0	0	0	4.52694	0	0	0	0	0	0	0	0	0	0	0	0	0	0
BMP3	chr4_81031479.0_81031498.0	943.519	1070.19	1027.34	1053.7	1201.14	1462.81	12.7706	1307.1	0	908.784	865.557	0	1016.51	30.1915	607.067	994.785	636.286	380.716	12.4355	83.921	8.27625	25.3294	410.073	109.366	369.633	3.94084	0	0	0	0	0	0	0	0	0	0	0	0	0	0	0	0	0	0	0	0	0	0
BMP3	chr4_81045852.0_81045871.0	778.556	620.876	708.607	627.59	1263.34	1240.45	0	411.522	0	1971.26	731.9	0	506.468	62.9416	98.4124	758.349	1517.59	154.922	2.90162	0	1.83917	18.9971	283.452	41.2316	1.11671	2.95563	0	0	0	0	0	0	0	0	0	0	0	0	0	0	0	0	0	0	0	0	0	0
BMP3	chr4_81046024.0_81046043.0	672.072	472.011	600.502	723.994	827.92	268.008	8.51374	940.827	0	413.185	408.039	0	136.288	1997.25	1.14433	247.201	133.736	358.991	1.65807	13.9868	0	6.33235	69.0953	12.2817	1.11671	16.7486	0	0	0	0	0	0	0	0	0	0	0	0	0	0	0	0	0	0	0	0	0	0
BMP3	chr4_81046181.0_81046200.0	273.193	606.353	371.042	377.904	343.433	240.343	0	361.967	0	194.899	695.273	0	457.666	2.5586	699.758	93.6972	183.766	0	0	0	0	0	24.4244	184.226	1.11671	46.3048	0	0	0	0	0	0	0	0	0	0	0	0	0	0	0	0	0	0	0	0	0	0
BMP3	chr4_81046276.0_81046295.0	721.823	275.945	719.766	666.152	505.513	433.309	0	774.926	0	266.176	729.973	0	352.325	155.051	0.572165	59.0093	274.847	0.712284	0.414518	13.9868	0.919583	6.33235	331.658	6.72572	0.558357	0.985209	0	0	0	0	0	0	0	0	0	0	0	0	0	0	0	0	0	0	0	0	0	0
BMP3	chr4_81046309.0_81046328.0	761.972	757.941	885.061	580.352	808.645	482.415	0	731.834	0	250.584	811.581	0	103.555	675.471	0.572165	90.5075	134.377	0.356142	0	13.9868	1.83917	12.6647	105.732	138.316	1.11671	673.883	0	0	0	0	0	0	0	0	0	0	0	0	0	0	0	0	0	0	0	0	0	0
BMP5	chr6_55759004.0_55759023.0	647.633	717.094	425.443	494.553	584.362	122.419	0	358.376	0	622.562	278.238	0	496.35	1482.45	9.7268	126.392	50.0306	0.356142	0	13.9868	0.919583	6.33235	7.71297	210.252	0.558357	0.985209	0	0	0	0	0	0	0	0	0	0	0	0	0	0	0	0	0	0	0	0	0	0
BMP5	chr6_55794302.0_55794321.0	729.678	603.63	526.573	632.41	555.451	187.433	4.25687	475.441	0	677.134	397.758	0	199.373	444.685	0	114.829	32.0709	911.012	0.414518	13.9868	0.919583	18.9971	29.5664	12.2817	1.11671	24.6302	0	0	0	0	0	0	0	0	0	0	0	0	0	0	0	0	0	0	0	0	0	0
BMP5	chr6_55794377.0_55794396.0	771.573	606.353	1007.11	767.376	1191.5	391.119	4.25687	184.575	0	739.501	909.253	0	932.591	248.696	3.43299	45.4531	482.987	0.712284	73.7841	13.9868	0.919583	6.33235	609.967	20.762	1.11671	0.985209	0	0	0	0	0	0	0	0	0	0	0	0	0	0	0	0	0	0	0	0	0	0
BMP5	chr6_55819733.0_55819752.0	300.25	95.31	388.478	413.573	395.124	63.6303	4.25687	279.375	0	90.2102	138.798	0	173.187	223.11	0	37.8776	30.788	126.787	0	13.9868	0.919583	12.6647	122.765	313.769	0	32.5119	0	0	0	0	0	0	0	0	0	0	0	0	0	0	0	0	0	0	0	0	0	0
BMP5	chr6_55874474.0_55874493.0	621.448	798.788	361.975	223.657	420.531	214.406	0	105.574	0	184.875	430.53	0	173.187	88.0159	0	60.2054	79.8565	84.4057	0.414518	27.9737	0.919583	6.33235	305.626	233.353	0.558357	0.985209	658.084	0	0	0	0	0	0	0	0	0	0	0	0	0	0	0	0	0	0	0	0	0
BMP5	chr6_55874785.0_55874804.0	662.471	678.062	385.688	537.934	536.177	97.5204	8.51374	435.222	0	1320.86	507.639	0	92.2474	63.4533	4.57732	68.5784	0.320709	0.356142	0.414518	0	0	0	70.7022	223.411	0	0	0	0	0	0	0	0	0	0	0	0	0	0	0	0	0	0	0	0	0	0	0	0
BMPER	chr7_33905691.0_33905710.0	309.851	277.76	390.571	402.005	611.522	207.49	17.0275	213.302	0	251.698	138.798	0	460.642	92.6214	2.28866	80.9384	286.393	0	0	0	0.919583	0	54.9549	115.507	0.558357	1.97042	0	0	0	0	0	0	0	0	0	0	0	0	0	0	0	0	0	0	0	0	0	0
BMPER	chr7_33906881.0_33906900.0	258.355	155.219	264.333	361.515	431.044	192.62	8.51374	216.175	0	280.654	129.801	0	42.8504	1494.74	1.14433	327.342	18.6011	0.712284	0.414518	13.9868	2.75875	6.33235	343.548	36.5528	0	0	0	0	1.97475	0	4.75406	0	0	9.05389	5.10422	6.07657	0	0	0	0	0	0	0	0	0	0	0	0
BMPER	chr7_33970408.0_33970427.0	1221.95	856.882	1237.97	1054.66	1052.2	2247.81	8.51374	705.261	0	1634.92	809.653	0	419.577	303.45	269.49	641.128	501.588	1.78071	248.711	223.789	3.67833	25.3294	941.625	191.537	1.11671	13.7929	0	0	0	0	0	0	0	0	0	0	0	0	0	0	0	0	0	0	0	0	0	0
BMPER	chr7_34046394.0_34046413.0	821.324	792.434	652.811	403.933	449.442	330.601	12.7706	710.289	0	924.376	534.628	0	295.787	409.888	22971.8	238.828	102.306	509.639	65.4938	55.9473	6.43708	12.6647	70.3808	4.97118	3725.36	196.057	0	0	0	0	0	0	0	0	0	0	0	0	0	0	0	0	0	0	0	0	0	0
BMPER	chr7_34078888.0_34078907.0	1067.46	1397.88	615.149	600.597	806.893	530.829	8.51374	631.288	0	791.845	421.534	0	992.701	133.047	17.1649	234.442	409.545	2334.16	33.1614	55.9473	3.67833	37.9941	323.302	373.131	3.35014	0.985209	0	0	0	0	0	0	0	0	0	0	0	0	0	0	0	0	0	0	0	0	0	0
BMPER	chr7_34078989.0_34079008.0	661.598	1364.29	749.756	765.448	865.592	734.861	0	630.57	0	318.52	2250.32	0	152.357	387.372	0	334.519	156.185	323.377	1.24355	13.9868	2.75875	12.6647	34.7083	648.593	1.67507	0.985209	0	0	0	0	0	0	0	0	0	0	0	0	0	0	0	0	0	0	0	0	0	0
BMX	chrX_15511477.0_15511496.0	537.657	641.754	711.396	624.698	721.035	360.687	0	767.026	0	553.512	320.006	0	256.507	286.563	2.86082	204.938	237.324	927.394	0	69.9342	1.83917	25.3294	1025.5	447.406	3.35014	42.364	0	0	0	0	0	0	0	0	0	0	0	0	0	0	0	0	0	0	0	0	0	0
BMX	chrX_15516127.0_15516146.0	459.104	231.467	518.203	515.761	536.177	215.444	0	171.647	0	488.917	321.291	0	232.106	1034.19	1.14433	102.07	949.618	99.7198	0.829035	41.9605	0.919583	12.6647	118.265	118.139	13.4006	0	0	0	0	0	0	0	0	0	0	0	0	0	0	0	0	0	0	0	0	0	0	0
BMX	chrX_15522545.0_15522564.0	693.019	435.703	603.989	532.15	483.61	135.56	0	880.5	0	392.025	406.754	0	145.215	383.79	0.572165	59.0093	263.302	0	26.1146	0	0	6.33235	168.078	31.874	0	0.985209	0	0	0	0	0	0	0	0	0	0	0	0	0	0	0	0	0	0	0	0	0	0
BMX	chrX_15531348.0_15531367.0	767.209	934.945	369.647	455.991	381.982	35.965	8.51374	987.51	0	252.811	533.343	0	244.604	125.883	52.067	29.5046	71.8388	2313.14	0.414518	69.9342	1.83917	18.9971	662.672	109.658	2.23343	16.7486	0	0	0	0	0	0	0	0	0	0	0	0	0	0	0	0	0	0	0	0	0	0
BMX	chrX_15536377.0_15536396.0	436.41	403.025	419.863	377.904	557.203	405.643	0	405.777	0	85.7554	185.706	0	265.434	535.771	2.86082	74.559	33.9951	1.06843	0.829035	13.9868	3.67833	6.33235	1681.43	12.5742	0.558357	98.5209	0	0	0	0	0	0	0	0	0	0	0	0	0	0	0	0	0	0	0	0	0	0
BMX	chrX_15536418.0_15536437.0	249.627	175.189	270.61	409.717	271.593	167.721	0	394.286	0	47.8894	81.6079	0	187.47	3.58204	1.71649	70.1732	169.334	0.356142	0.414518	0	0	6.33235	67.4885	1.16969	5.02522	778.315	0	0	0	0	0	0	0	0	0	0	0	0	0	0	0	0	0	0	0	0	0	0
BRCA1	chr17_43047660.0_43047679.0	1300.5	1312.55	1644.58	2011.95	1121.42	1317.56	4.25687	737.58	0	701.635	1641.15	0	1239.09	410.912	323.845	1404.66	421.732	130.704	1.24355	55.9473	5.5175	12.6647	428.07	677.25	1.67507	4.92605	0	0	0	0	0	0	0	0	0	0	0	0	0	0	0	0	0	0	0	0	0	0
BRCA1	chr17_43091917.0_43091936.0	167.582	505.597	1126.38	1628.26	1017.16	591.001	0	293.739	0	75.732	332.857	0	281.503	141.235	0.572165	39.8711	288.959	0	0	13.9868	0.919583	0	37.2793	21.3468	0.558357	0.985209	0	0	0	4.33187	4.75406	5.46598	0	0	1.27605	6.07657	0	0	0	0	0	0	0	0	0	0	0	0
BRCA1	chr17_43093192.0_43093211.0	1156.49	669.893	956.2	930.299	807.769	836.531	0	1264.73	0	582.468	733.186	0	2332.97	336.2	3187.53	545.437	453.803	1.78071	1.24355	55.9473	6.43708	31.6618	376.007	309.383	2.79179	2869.92	0	0	0	0	0	0	0	0	0	0	0	0	0	0	0	0	0	0	0	0	0	0
BRCA1	chr17_43093521.0_43093540.0	338.654	147.05	382.899	607.345	389.867	174.638	0	276.503	0	51.2305	324.504	0	471.949	0.511721	7.43814	40.6686	40.0886	0	0	0	0.919583	0	0	1.16969	0	5.91126	0	0	0	0	0	0	0	0	0	0	0	0	0	0	0	0	0	0	0	0	0	0
BRCA1	chr17_43094128.0_43094147.0	960.975	510.135	514.716	472.38	528.292	34.9275	8.51374	676.534	0	319.634	855.919	0	222.584	342.853	0	21.9291	63.1796	2.49299	0.414518	83.921	0.919583	8593	1732.2	576.072	3.35014	11.8225	0	0	0	0	0	0	0	0	0	0	0	0	0	0	0	0	0	0	0	0	0	0
BRCA1	chr17_43094569.0_43094588.0	279.303	175.189	868.322	836.787	315.398	642.182	4.25687	133.583	0	103.575	161.288	0	158.904	165.286	9.7268	136.359	31.7502	0.356142	0	27.9737	1.83917	6.33235	9.31983	89.4813	0	1.97042	0	0	0	0	0	0	0	0	0	0	0	0	0	0	0	0	0	0	0	0	0	0
BRCA2	chr13_32319129.0_32319148.0	505.363	356.732	731.622	833.895	516.026	47.7227	4.25687	390.695	0	904.33	312.937	0	130.337	859.179	2.28866	13.9549	19.8839	0	0	13.9868	0	0	72.9518	13.4514	0	0	0	0	0	0	0	0	0	0	0	0	0	0	0	0	0	0	0	0	0	0	0	0
BRCA2	chr13_32326588.0_32326607.0	721.823	537.367	1444.41	1900.12	912.902	1187.54	8.51374	1341.58	0	1017.93	468.442	0	536.82	67.0354	0.572165	400.306	1497.07	111.829	3.73066	209.803	11138	164.641	202.787	35.6755	9.49208	10661	0	0	0	0	0	0	0	0	0	0	0	0	0	0	0	0	0	0	0	0	0	0
BRCA2	chr13_32336732.0_32336751.0	498.38	689.863	656.298	591.921	353.947	252.792	0	465.386	0	1054.68	688.847	0	345.184	1265.48	1.14433	370.802	65.7453	2.49299	89.9503	55.9473	13353.3	44.3265	235.567	66.3799	3.35014	3.94084	0	0	0	0	0	0	0	0	0	0	0	0	0	0	0	0	0	0	0	0	0	0
BRCA2	chr13_32337866.0_32337885.0	1655.74	1287.14	2585.44	2632.79	1898.52	4790.26	4.25687	1502.45	0	670.451	3079.89	0	3438.15	2380.52	19.4536	815.764	1760.37	404.934	3.31614	153.855	7.35666	50.6588	663.958	519.927	2.23343	40.3936	0	0	0	0	0	0	0	0	0	0	0	0	0	0	0	0	0	0	0	0	0	0
BRCA2	chr13_32340019.0_32340038.0	1288.28	1339.79	2203.24	1555	1347.45	1847.7	17.0275	1468.7	0	2304.26	2436.03	0	864.745	356.157	654.557	770.709	537.828	6173.01	3.73066	139.868	8.27625	69.6559	1175.58	61.1163	6.14193	44.3344	0	0	0	0	0	0	0	0	0	0	0	0	0	0	0	0	0	0	0	0	0	0
BRCA2	chr13_32340521.0_32340540.0	722.695	600.907	1062.91	900.413	600.132	452.674	4.25687	593.224	0	407.617	536.556	0	507.063	290.657	374.768	182.211	87.8742	0	0.414518	41.9605	1.83917	12.6647	93.1983	52.636	1.11671	8.86689	0	0	0	0	0	0	0	0	0	0	0	0	0	0	0	0	0	0	0	0	0	0
BTNL9	chr5_181045569.0_181045588.0	376.186	221.482	425.443	373.084	299.628	389.044	4.25687	94.0827	0	406.503	629.087	0	14.8786	10.7461	5.14948	84.5268	90.4399	0.356142	0	13.9868	0	18.9971	327.48	0.584845	0	1.97042	0	0	0	0	0	0	0	0	0	0	0	0	0	0	0	0	0	0	0	0	0	0
BTNL9	chr5_181045591.0_181045610.0	1126.81	1253.55	1020.37	891.737	1036.43	889.441	21.2843	859.672	0	818.574	1678.42	0	229.726	190.36	1.71649	90.5075	194.349	25.2861	46.8405	685.355	52.4162	417.935	243.923	20940.4	16300.7	178.323	0	0	0	0	0	0	0	0	0	0	0	0	0	0	0	0	0	0	0	0	0	0
BTNL9	chr5_181048042.0_181048061.0	1418.33	2002.42	879.481	835.823	1032.05	649.444	8.51374	445.277	0	490.031	774.311	0	652.873	4.60548	0	308.603	322.312	1.42457	2.48711	83.921	3.67833	37.9941	3626.7	454.132	2.79179	8.86689	0	0	0	0	0	0	0	0	0	0	0	0	0	0	0	0	0	0	0	0	0	0
BTNL9	chr5_181050221.0_181050240.0	468.705	560.967	837.634	596.741	642.185	261.438	0	396.44	0	262.835	348.279	0	392.2	165.286	168.789	90.5075	115.134	207.631	1.24355	0	0	0	412.644	1.46211	0.558357	0.985209	0	0	0	0	0	0	0	0	0	0	0	0	0	0	0	0	0	0	0	0	0	0
BTNL9	chr5_181053220.0_181053239.0	1166.09	1223.6	923.42	1071.05	698.256	1154.34	17.0275	1025.57	0	418.754	1034.56	0	218.418	10.7461	1.14433	1012.73	296.976	3.56142	0.829035	55.9473	4.59791	31.6618	218.534	295.931	2.23343	6.89647	0	0	0	0	0	0	0	0	0	0	0	0	0	0	0	0	0	0	0	0	0	0
BTNL9	chr5_181053457.0_181053476.0	258.355	283.207	278.282	227.513	249.69	117.924	12.7706	226.948	0	100.234	188.919	0	770.117	35.8204	1.14433	9.56907	21.8082	0.356142	0.414518	13.9868	0.919583	0	205.679	7.31056	0	5.91126	0	0	0	0	0	0	0	0	0	0	0	0	0	0	0	0	0	0	0	0	0	0
C10orf90	chr10_126504108.0_126504127.0	291.522	98.0331	156.228	207.269	56.0708	496.939	0	0	0	52.3442	32.7717	0	58.3241	3.58204	0	51.8325	112.248	2.49299	2.90162	97.9078	4.59791	50.6588	622.179	3149.97	7.25865	46.3048	0	0	0	0	0	0	0	0	0	0	0	0	0	0	0	0	0	0	0	0	0	0
C10orf90	chr10_126504359.0_126504378.0	633.668	515.581	720.463	527.33	477.478	306.74	4.25687	507.76	0	376.433	530.13	0	774.878	69.0823	3.43299	75.7552	203.009	4707.13	2.90162	111.895	1.83917	25.3294	127.907	4.67876	6.70029	17.7338	0	0	0	0	0	0	0	0	0	0	0	0	0	0	0	0	0	0	0	0	0	0
C10orf90	chr10_126504568.0_126504587.0	509.727	550.982	788.116	790.513	813.026	462.357	0	726.089	0	746.183	640.011	0	269.6	182.173	50.9227	50.6364	4.16921	0.356142	0	13.9868	0	0	128.871	74.8601	1.11671	30.5415	4.73442	0	1.97475	12350.2	0	5.46598	2.6809	4.52694	6.38027	6.07657	0	0	0	0	0	0	0	0	0	0	0	0
C10orf90	chr10_126504852.0_126504871.0	583.044	747.956	550.286	438.638	941.813	1258.43	370.348	736.144	0	208.263	1782.52	0	245.199	273.77	2.28866	1407.05	137.584	3.20528	1.24355	125.882	8.27625	37.9941	308.84	33.3362	5.02522	4963.49	0	0	0	0	0	0	0	0	0	0	0	0	0	0	0	0	0	0	0	0	0	0
C10orf90	chr10_126504954.0_126504973.0	616.211	646.292	774.864	887.881	778.858	1552.37	8.51374	537.205	0	2978.05	313.58	0	1175.41	288.099	24.6031	570.955	211.347	527.803	2.07259	55.9473	2.75875	50.6588	586.507	798.606	5.02522	3.94084	0	0	0	0	0	0	0	0	0	0	0	0	0	0	0	0	0	0	0	0	0	0
C10orf90	chr10_126513849.0_126513868.0	293.268	433.887	289.441	230.406	283.858	103.053	0	257.112	0	497.827	609.167	0	66.6562	0.511721	0.572165	21.5304	14.1112	85.4741	0	13.9868	0	0	37.9221	40.9391	0	0.985209	0	0	0	0	0	0	0	0	0	0	0	0	0	0	0	0	0	0	0	0	0	0
C14orf180	chr14_104586481.0_104586500.0	340.4	496.519	481.936	562.035	650.07	438.842	4.25687	117.783	0	197.126	289.162	0	1392.64	51.1721	345.588	577.334	270.678	0	1.65807	41.9605	1.83917	12.6647	662.994	58.1921	2.23343	0	0	0	0	0	0	0	0	0	0	0	0	0	0	0	0	0	0	0	0	0	0	0
C14orf180	chr14_104586484.0_104586503.0	323.816	446.595	274.097	341.27	268.088	99.9411	0	303.076	0	451.051	233.9	0	85.7008	2.04688	1.14433	42.6621	14.4319	0.356142	0.829035	13.9868	4.59791	12.6647	1793.91	13.7439	1.67507	26.6007	0	0	0	0	0	0	0	0	0	0	0	0	0	0	0	0	0	0	0	0	0	0
C14orf180	chr14_104587776.0_104587795.0	735.788	772.465	659.088	501.301	602.761	197.807	0	427.322	0	1961.24	413.823	0	376.726	326.478	46.9175	30.7008	407.3	0.712284	0.414518	13.9868	0.919583	6.33235	438.675	43.5709	0.558357	12.8077	0	0	0	0	0	0	0	0	0	0	0	0	0	0	0	0	0	0	0	0	0	0
C14orf180	chr14_104587793.0_104587812.0	583.917	468.38	549.589	513.833	811.274	368.987	8.51374	303.076	0	1334.22	895.116	0	246.985	8.18753	1.14433	245.606	338.027	0.712284	0	0	0	6.33235	18.6397	23.9786	0.558357	497.531	0	0	0	0	0	0	0	0	0	0	0	0	0	0	0	0	0	0	0	0	0	0
C14orf180	chr14_104587844.0_104587863.0	298.505	339.485	514.019	487.804	495	229.622	4.25687	135.02	0	339.68	100.243	0	199.373	6.14065	14.3041	126.392	40.4093	489.339	1.65807	13.9868	2.75875	0	10.9267	98.5464	0	0.985209	0	0	0	0	0	0	0	0	0	0	0	0	0	0	0	0	0	0	0	0	0	0
C14orf180	chr14_104588300.0_104588319.0	1065.71	457.488	592.133	447.315	694.752	168.067	0	77.5644	0	154.805	316.793	0	231.511	1.02344	6.29381	25.9162	50.672	0.712284	0	13.9868	0	0	145.261	343.889	3.9085	0	0	0	0	0	0	0	0	0	0	0	0	0	0	0	0	0	0	0	0	0	0	0
C16orf89	chr16_5056073.0_5056092.0	847.509	1127.38	966.662	750.023	756.079	1699	12.7706	926.464	0	984.516	362.416	0	252.341	126.907	133.887	1909.43	74.4044	1927.08	426.953	55.9473	10.1154	56.9912	264.49	223.703	5.58357	8.86689	0	0	0	0	0	0	0	0	0	0	0	0	0	0	0	0	0	0	0	0	0	0
C16orf89	chr16_5060328.0_5060347.0	763.718	486.535	698.842	577.46	187.487	226.51	0	739.016	0	400.934	759.531	0	343.993	400.165	3.43299	25.9162	177.673	0.356142	0.414518	13.9868	0	0	13.4977	36.8452	0	0.985209	0	0	0	0	0	0	0	0	0	0	0	0	0	0	0	0	0	0	0	0	0	0
C16orf89	chr16_5060348.0_5060367.0	1062.22	1665.65	675.129	845.463	582.61	1084.48	0	1385.39	0	1242.9	864.272	0	1090.3	646.815	4.57732	1560.16	125.718	1.78071	2.90162	69.9342	8.27625	37.9941	60.4182	451.208	3808	7.88168	4.73442	0	1.97475	12.9956	9.50812	10.932	9042.67	4.52694	1.27605	6.07657	1.80081	13.3938	2.264	1.33922	0	4845.48	0	0	0	0	0	0
C16orf89	chr16_5060351.0_5060370.0	453.867	478.365	588.646	749.059	297.876	257.634	0	142.92	0	144.782	331.572	0	135.693	1.53516	137.32	229.658	150.412	0.356142	0	13.9868	0	0	24.103	10.5272	0	0.985209	0	0	0	0	0	0	0	0	0	0	0	0	0	0	0	0	0	0	0	0	0	0
C16orf89	chr16_5060376.0_5060395.0	777.683	534.643	557.958	540.827	672.849	591.347	0	295.176	0	1416.63	1224.12	0	400.532	36.3322	12934.4	261.156	127.321	0.712284	0.414518	27.9737	0	0	40.4931	4.97118	0	158.619	0	0	0	0	0	0	0	0	0	0	0	0	0	0	0	0	0	0	0	0	0	0
C16orf89	chr16_5065750.0_5065769.0	423.318	501.058	511.229	599.633	208.513	428.813	0	1101.7	0	480.007	1921.96	0	55.3484	58.8479	14.3041	54.6235	391.585	0.356142	0	13.9868	0	12.6647	7.39159	70.7662	2.23343	6.89647	0	0	0	0	0	0	0	0	0	0	0	0	0	0	0	0	0	0	0	0	0	0
C1QTNF7	chr4_15435797.0_15435816.0	540.276	333.131	352.908	203.412	518.654	140.402	0	1388.26	0	805.21	201.128	0	71.4173	119.231	0	72.1668	2076.27	0.356142	0.829035	13.9868	1.83917	12.6647	4.49923	5.2636	1.11671	0.985209	0	0	0	0	0	0	0	0	0	0	0	0	0	0	0	0	0	0	0	0	0	0
C1QTNF7	chr4_15435905.0_15435924.0	900.751	1050.22	955.503	598.669	1110.9	1631.91	4.25687	973.146	0	555.74	544.267	0	270.195	356.669	2.86082	1011.13	25.336	1.78071	1.65807	27.9737	6.43708	25.3294	263.526	79.5389	1.67507	2016.72	0	0	0	0	4.75406	0	0	0	0	0	0	0	0	0	0	0	0	0	0	0	2.95957	0
C1QTNF7	chr4_15435915.0_15435934.0	350.001	127.08	514.019	506.121	581.734	337.517	0	257.83	0	305.156	450.45	0	288.645	66.5237	10.8711	205.336	14.1112	0	0.414518	13.9868	0.919583	0	59.4541	23.9786	0.558357	0	0	0	0	0	0	0	0	0	0	0	0	0	0	0	0	0	0	0	0	0	0	0
C1QTNF7	chr4_15442173.0_15442192.0	972.322	692.586	654.903	892.701	623.787	539.474	4.25687	496.987	0	683.816	437.598	0	914.142	1145.23	10.299	146.327	2.56567	0.712284	0.829035	55.9473	1.83917	0	73.9159	237.739	864.337	48.2753	0	0	0	0	0	0	0	0	0	0	0	0	0	0	0	0	0	0	0	0	0	0
C1QTNF7	chr4_15442456.0_15442475.0	681.673	625.415	603.292	711.462	813.026	519.417	8.51374	494.114	0	1134.87	691.418	0	308.88	75.2229	0.572165	187.793	326.161	0.356142	0.414518	69.9342	1.83917	37.9941	751.371	160.54	1.67507	1.97042	0	0	0	0	0	0	0	0	0	0	0	0	0	0	0	0	0	0	0	0	0	0
C1QTNF7	chr4_15442498.0_15442517.0	350.874	568.229	566.327	562.035	553.699	101.324	0	566.651	0	190.444	224.261	0	165.45	607.924	1.14433	66.9835	366.249	817.346	1.24355	55.9473	4.59791	31.6618	56.8831	173.699	3469.08	4.92605	0	0	0	0	0	0	0	0	0	0	0	0	0	0	0	0	0	0	0	0	0	0
C1QTNF9	chr13_24316105.0_24316124.0	506.236	323.146	557.26	874.384	258.451	1047.13	8.51374	393.568	0	668.224	4150.43	0	92.2474	19.4454	4.00515	1225.24	418.204	1.42457	0	69.9342	4.59791	6.33235	323.945	686.9	3.9085	5.91126	0	0	0	0	0	0	0	0	0	0	0	0	0	0	0	0	0	0	0	0	0	0
C1QTNF9	chr13_24318824.0_24318843.0	552.495	558.244	665.365	751.951	358.327	1813.46	0	117.065	0	44.5483	355.99	0	127.956	89.5511	23.4588	1604.41	6.41417	3.56142	2.90162	41.9605	6.43708	37.9941	95.1266	138.316	3.35014	4520.14	0	0	0	0	0	0	0	0	0	0	0	0	0	0	0	0	0	0	0	0	0	0
C1QTNF9	chr13_24321010.0_24321029.0	890.277	1738.27	495.885	442.494	586.115	452.329	8.51374	468.259	0	402.048	679.851	0	328.52	285.54	1.14433	649.501	176.39	2.13685	3527.96	83.921	7.35666	37.9941	82.593	9.64994	3.35014	5.91126	0	0	0	0	0	0	0	0	0	0	0	0	0	0	0	0	0	0	0	0	0	0
C1QTNF9	chr13_24321091.0_24321110.0	413.717	357.639	786.023	707.605	322.407	587.543	4.25687	231.257	0	185.989	440.811	0	199.373	734.319	1.71649	131.575	47.7856	0.712284	0.414518	13.9868	3.67833	18.9971	16.0687	1152.14	2.23343	0.985209	0	0	0	0	0	0	0	0	0	0	0	0	0	0	0	0	0	0	0	0	0	0
C1QTNF9	chr13_24321219.0_24321238.0	1420.08	1155.52	852.978	746.167	992.628	196.424	0	538.642	0	1182.76	1249.82	0	403.508	702.081	1.71649	41.0673	175.748	0	0	13.9868	0.919583	0	131.763	31.874	3.9085	0	0	0	0	0	0	0	0	0	0	0	0	0	0	0	0	0	0	0	0	0	0	0
C1QTNF9	chr13_24321411.0_24321430.0	791.648	1081.09	805.552	497.445	991.751	184.666	4.25687	344.731	0	3716.44	783.95	0	1022.46	544.471	9.15464	241.22	239.249	0.356142	12.85	0	1.83917	0	251.314	107.027	0	0.985209	0	0	0	0	0	0	0	0	0	0	0	0	0	0	0	0	0	0	0	0	0	0
C2orf40	chr2_106071870.0_106071889.0	233.043	39.9394	108.104	249.686	300.504	35.2733	0	32.3185	0	485.576	64.9007	0	64.8707	67.0354	81.8196	1.59485	24.3739	0	0	0	0	0	0	5.2636	0	0	0	0	0	0	0	0	0	0	0	0	0	0	0	0	0	0	0	0	0	0	0	0
C2orf40	chr2_106073915.0_106073934.0	379.677	254.16	288.046	237.154	355.699	54.2933	12.7706	1248.93	0	407.617	377.195	0	3223.9	27.1212	14.8763	68.5784	27.9017	0	0	0	0	0	9.96258	14.3287	1.11671	0.985209	0	0	0	0	0	0	0	0	0	0	0	0	0	0	0	0	0	0	0	0	0	0
C2orf40	chr2_106073974.0_106073993.0	1549.26	1325.26	1241.46	1213.73	1436.81	477.573	12.7706	1562.78	0	761.775	1371.27	0	868.911	791.12	3.43299	9199.47	201.726	701.244	807.066	573.46	30.3462	240.629	12014.6	6666.94	748.757	1332.99	0	0	0	0	0	0	0	0	0	0	0	0	0	0	0	0	0	0	0	0	0	0
C2orf40	chr2_106074012.0_106074031.0	220.824	61.7245	263.635	256.435	172.593	224.781	0	435.222	0	47.8894	91.8892	0	69.6319	0.511721	0.572165	2136.3	70.2352	101.501	0.414518	41.9605	2.75875	12.6647	56.8831	8.48025	1.11671	2.95563	0	0	0	0	0	0	0	0	0	0	0	0	0	0	0	0	0	0	0	0	0	0
C2orf40	chr2_106074022.0_106074041.0	178.055	354.008	466.592	522.51	191.867	203.686	0	273.63	0	350.818	235.185	0	608.833	644.768	44.0567	112.835	310.767	0.712284	0.829035	0	0.919583	0	140.119	2.92422	0	26.6007	0	0	0	0	0	0	0	0	0	0	0	0	0	0	0	0	0	0	0	0	0	0
C2orf40	chr2_106074026.0_106074045.0	360.475	824.204	606.779	611.201	316.274	399.764	4.25687	235.566	0	265.062	451.735	0	157.118	35.3087	0.572165	35.0866	47.1442	0	0.414518	13.9868	0.919583	6.33235	107.66	69.0117	0.558357	5.91126	0	0	0	0	0	0	0	0	0	0	0	0	0	0	0	0	0	0	0	0	0	0
C2orf82	chr2_232870399.0_232870418.0	375.313	355.824	699.54	656.511	497.628	680.914	0	183.856	0	344.135	759.531	0	1476.55	135.094	6.29381	397.515	85.9499	2.49299	0.414518	0	0.919583	6.33235	98.0189	40.9391	0	1.97042	0	0	0	0	0	0	0	0	0	0	0	0	0	0	0	0	0	0	0	0	0	0
C2orf82	chr2_232875966.0_232875985.0	221.696	399.394	308.969	362.479	589.619	291.178	0	672.225	0	159.26	351.492	0	784.995	182.173	0.572165	1999.14	19.2425	1.78071	0.829035	83.921	1.83917	18.9971	932.305	91.8206	1.11671	2.95563	0	0	0	0	0	0	0	0	0	0	0	0	0	0	0	0	0	0	0	0	0	0
C2orf82	chr2_232875992.0_232876011.0	932.172	628.138	669.549	675.792	806.893	641.145	8.51374	345.449	0	983.403	153.577	0	654.064	681.1	8.01031	1535.84	808.507	2.13685	2.48711	83.921	6.43708	31.6618	286.665	1870.92	1.11671	57.1422	0	0	0	0	0	0	0	0	0	0	0	0	0	0	0	0	0	0	0	0	0	0
C2orf82	chr2_232876064.0_232876083.0	991.524	822.389	1039.89	1256.14	900.636	1402.98	4.25687	321.749	0	1189.44	749.893	0	910.571	678.541	339.866	383.959	3908.16	5.69827	3.73066	111.895	6.43708	44.3265	275.096	389.799	3232.89	17.7338	0	0	0	0	0	0	0	0	0	0	0	0	0	0	0	0	0	0	0	0	0	0
C2orf82	chr2_232876079.0_232876098.0	746.261	644.477	540.522	624.698	492.371	1010.13	4.25687	499.141	0	290.677	1265.24	0	354.706	17.9102	276.356	132.372	176.069	0	0.414518	27.9737	2.75875	0	117.623	18.715	4.46686	10.8373	0	0	0	0	0	0	0	0	0	0	0	0	0	0	0	0	0	0	0	0	0	0
C2orf82	chr2_232876351.0_232876370.0	448.63	402.117	421.258	363.443	330.292	133.14	12.7706	808.681	0	1317.51	510.21	0	77.9639	55.7775	137.32	39.8711	41.3714	4.98599	0.414518	41.9605	0	0	313.018	6.72572	0	0.985209	0	0	0	0	0	0	0	0	0	0	0	0	0	0	0	0	0	0	0	0	0	0
C2orf88	chr2_190199949.0_190199968.0	314.215	325.869	491.003	470.452	488.867	370.716	0	363.404	0	38.9797	337.355	0	771.902	19.9571	5.14948	356.847	161.958	3322.45	12.4355	83.921	3.67833	69.6559	381.149	338.333	3.35014	9.85209	0	0	0	0	0	0	0	0	0	0	0	0	0	0	0	0	0	0	0	0	0	0
C2orf88	chr2_190200013.0_190200032.0	821.324	766.111	920.631	1023.81	922.539	710.308	12.7706	657.143	0	732.819	492.86	0	574.909	78.805	12.0155	437.785	3958.19	0.712284	17.4097	41.9605	6.43708	12.6647	86.4495	42.4013	1.67507	3.94084	0	0	0	0	0	0	0	0	0	0	0	0	0	0	0	0	0	0	0	0	0	0
C2orf88	chr2_190200016.0_190200035.0	715.713	862.328	501.465	489.732	648.318	232.043	4.25687	581.015	0	475.553	336.07	0	288.645	2.5586	1.71649	204.938	5.45205	0	0.829035	0	0	0	208.25	1.16969	1.67507	57.1422	0	0	0	0	0	0	0	0	0	0	0	0	0	0	0	0	0	0	0	0	0	0
C4BPA	chr1_207114138.0_207114157.0	631.922	793.342	486.818	311.385	312.77	611.058	0	223.357	0	387.57	348.922	0	225.56	334.154	33.7577	349.67	411.149	0	0.414518	27.9737	0.919583	25.3294	471.455	7.89541	1.11671	2.95563	0	0	0	0	0	0	0	0	0	0	0	0	0	0	0	0	0	0	0	0	0	0
C4BPA	chr1_207114276.0_207114295.0	249.627	186.989	207.142	171.599	124.407	81.9586	4.25687	59.6097	0	10.0234	60.4027	0	58.3241	1.02344	4.57732	47.8454	2.88638	0.356142	0	0	0	18.9971	6.42747	171.067	0	15.7634	0	0	0	0	0	0	0	0	0	0	0	0	0	0	0	0	0	0	0	0	0	0
C4BPA	chr1_207124300.0_207124319.0	429.428	648.108	627.005	612.165	431.044	679.184	8.51374	383.513	0	444.369	607.24	0	132.122	2255.15	220.856	291.857	313.653	0.712284	0.829035	41.9605	1.83917	18.9971	454.744	11.6969	1.11671	1.97042	0	0	0	0	0	0	0	0	0	0	0	0	0	0	0	0	0	0	0	0	0	0
C4BPA	chr1_207131648.0_207131667.0	617.957	761.572	520.296	312.349	539.681	359.304	0	583.888	0	337.453	647.08	0	217.823	27.6329	2.28866	486.827	146.243	0.712284	0.829035	27.9737	2.75875	25.3294	261.277	707.077	2.79179	1.97042	0	0	0	0	0	0	2.6809	0	0	0	0	0	0	0	0	0	0	0	0	2.64664	0	1.83908
C4BPA	chr1_207134434.0_207134453.0	126.559	255.975	447.064	350.911	351.318	503.164	0	393.568	0	233.878	362.416	0	257.697	80.8518	13564.9	460.512	168.693	0.712284	87.4632	0	0	6.33235	105.089	1.75453	1.11671	92.6097	0	0	0	0	0	0	0	0	0	0	0	0	0	0	0	0	0	0	0	0	0	0
C4BPA	chr1_207141234.0_207141253.0	453.867	427.533	499.372	740.383	466.088	475.152	4.25687	231.975	0	155.919	699.129	0	49.397	36.3322	1.71649	130.379	146.564	1.78071	810.382	27.9737	5.5175	0	477.24	12.2817	0	2.95563	0	0	0	0	0	0	0	0	0	0	0	0	0	0	0	0	0	0	0	0	0	0
C6	chr5_41159147.0_41159166.0	497.508	626.323	646.534	856.068	924.291	271.466	4.25687	774.926	0	487.803	834.713	0	658.23	1469.66	34.9021	68.5784	3416.83	4429.7	2.48711	97.9078	6.43708	25.3294	389.505	57.6072	4.46686	346.794	0	0	0	0	0	0	0	0	0	0	0	0	0	0	0	0	0	0	0	0	0	0
C6	chr5_41159150.0_41159169.0	1211.47	1062.93	1018.27	872.456	1205.52	547.428	12.7706	1185.73	0	600.288	1528.06	96.2182	682.035	266.606	10.8711	462.505	186.652	150.292	5.38873	153.855	8680.86	56.9912	212.428	321.665	4294.33	21.6746	0	0	0	0	0	0	0	0	0	0	0	0	0	0	0	0	0	0	0	0	2619.22	0
C6	chr5_41176492.0_41176511.0	1070.95	661.723	899.707	807.866	881.362	760.106	8.51374	578.142	0	424.322	634.228	0	1220.64	369.974	1.14433	569.759	297.938	3859.51	95860.1	2056.06	149.892	835.87	1264.93	63.4557	71.4698	145.811	0	0	0	0	0	0	0	0	0	0	0	0	0	0	0	0	0	0	0	0	0	0
C6	chr5_41181463.0_41181482.0	502.745	883.206	564.235	581.316	518.654	562.298	21.2843	592.506	0	231.651	1102.67	0	130.932	298.845	2.86082	100.475	2.24496	0.356142	38.1356	27.9737	0.919583	18.9971	41.7786	300.61	1.11671	398.025	0	0	0	0	0	0	0	0	0	0	0	0	0	0	0	0	0	0	0	0	0	0
C6	chr5_41186151.0_41186170.0	484.415	486.535	718.371	549.503	678.106	125.877	0	566.651	0	592.492	485.792	0	167.236	346.435	31.4691	165.465	155.223	170.236	1.65807	0	0	0	195.074	90.0661	0.558357	0.985209	0	0	0	0	0	0	0	0	0	0	0	0	0	0	0	0	0	0	0	0	0	0
C6	chr5_41201590.0_41201609.0	720.077	1122.84	454.736	627.59	247.938	60.518	0	547.978	0	418.754	174.14	0	136.288	20.9805	0.572165	61.0028	5267	1.78071	2.48711	83.921	5.5175	44.3265	510.984	23.1014	5.58357	14.7781	0	0	0	0	0	0	0	0	0	0	0	0	0	0	0	0	0	0	0	0	0	0
C7	chr5_40934397.0_40934416.0	517.583	771.557	544.009	559.143	360.079	307.085	4.25687	326.058	0	517.873	1296.09	0	334.471	1017.81	14.3041	1252.35	107.437	267.107	1.65807	27.9737	1.83917	31.6618	28.6022	50.0042	3.35014	319.208	0	0	0	0	0	0	0	0	0	0	0	0	0	0	0	0	0	0	0	0	0	0
C7	chr5_40936435.0_40936454.0	135.287	164.296	174.362	85.7996	274.221	114.811	0	35.1913	0	23.3878	31.4865	0	5270	443.662	6.29381	12.7588	229.627	0.356142	0	27.9737	1.83917	6.33235	15.4259	15.206	0.558357	0	0	0	0	0	0	0	0	0	0	0	1.80081	11907.1	0	0	0	0	0	0	0	0	0	0
C7	chr5_40947737.0_40947756.0	498.38	498.335	671.642	717.246	542.309	348.238	0	504.887	0	369.751	368.199	0	314.831	154.54	2.28866	70.1732	246.304	118.595	29.8453	55.9473	2.75875	0	217.57	61.4087	0.558357	16.7486	0	0	0	0	0	0	0	0	0	0	0	0	0	0	0	0	0	0	0	0	0	0
C7	chr5_40958032.0_40958051.0	178.928	332.223	159.715	178.347	283.858	106.857	0	151.538	0	46.7757	116.95	0	24.9961	2501.8	1.14433	3.5884	4.16921	0	0.414518	0	0.919583	6.33235	54.3121	403.543	0	0	0	0	0	0	0	0	0	0	0	0	0	0	0	0	0	0	0	0	0	0	0	0
C7	chr5_40958203.0_40958222.0	608.356	942.207	893.43	887.881	903.265	870.421	8.51374	639.906	0	660.428	388.119	0	1452.75	153.004	8.01031	201.748	383.888	896.054	1.65807	83.921	8.27625	25.3294	1580.19	714.096	0.558357	34.4823	0	0	0	0	0	5.46598	0	0	0	0	0	0	0	0	0	0	0	0	0	0	0	0
C7	chr5_40964826.0_40964845.0	704.366	763.387	569.815	720.138	580.858	205.761	0	303.794	0	1771.91	579.609	0	557.055	117.184	29.7526	216.899	1231.2	1.06843	0.829035	13.9868	0	37.9941	210.178	1087.23	13.4006	37.438	0	0	0	0	0	0	0	0	0	0	0	0	0	0	0	0	0	0	0	0	0	0
CA3	chr8_85439721.0_85439740.0	950.501	1755.52	703.724	663.26	746.442	132.448	0	828.79	0	668.224	493.503	0	1086.14	4244.72	5.14948	48.6428	16.6769	1183.1	0.829035	55.9473	1.83917	18.9971	56.5618	456.179	1177.02	40.3936	0	0	0	0	0	0	0	0	0	0	0	0	0	0	0	0	0	0	0	0	0	0
CA3	chr8_85439768.0_85439787.0	298.505	319.515	328.498	269.931	394.247	183.975	4.25687	409.368	0	386.456	226.189	0	52.3727	161.704	0	115.228	28.5431	495.394	2.48711	139.868	6.43708	44.3265	226.568	1631.72	2534.94	2052.19	0	0	0	0	0	0	0	0	0	0	0	0	0	0	0	0	0	0	0	0	0	0
CA3	chr8_85439815.0_85439834.0	374.44	244.175	361.975	431.89	190.115	505.584	4.25687	25.8548	0	79.0732	204.984	0	67.8464	167.844	0	51.0351	2419.75	2.49299	1.24355	13.9868	0.919583	0	167.436	7.01814	1.11671	0.985209	0	0	0	0	0	0	0	0	0	0	0	0	0	0	0	0	0	0	0	0	0	0
CA3	chr8_85439877.0_85439896.0	196.385	86.2328	230.855	122.433	229.54	112.045	0	109.165	0	89.0965	113.094	0	161.284	5.62893	0	31.0995	0.962126	156.346	1.24355	13.9868	1.83917	6.33235	107.017	19.5923	0	0	0	0	0	0	0	0	0	0	0	0	0	0	0	0	0	0	0	0	0	0	0	0
CA3	chr8_85442063.0_85442082.0	374.44	409.379	463.105	352.839	369.717	337.863	8.51374	136.456	0	47.8894	55.9046	0	4903.99	1162.12	16.0206	158.288	136.622	0	0	0	0.919583	0	21.8534	54.3906	0.558357	0	0	0	0	0	0	0	0	0	0	0	0	0	0	0	0	0	0	0	0	0	0	0
CA3	chr8_85446129.0_85446148.0	274.066	195.158	248.989	313.313	188.363	43.5729	4.25687	377.767	0	331.885	139.44	0	245.795	112.579	5.72165	13.1575	7.3763	99.7198	0	0	0	0	17.3542	0	0	0.985209	0	0	0	0	0	0	0	0	0	0	0	0	0	0	0	0	0	0	0	0	0	0
CA4	chr17_60155312.0_60155331.0	263.592	207.866	581.671	571.676	322.407	791.921	0	38.064	0	53.4579	93.1743	0	202.944	0	0.572165	416.653	3.8485	0	0	41.9605	0.919583	12.6647	49.1702	173.991	0	2.95563	0	0	0	0	0	0	0	0	0	0	0	0	0	0	0	0	0	0	0	0	0	0
CA4	chr17_60155359.0_60155378.0	56.7333	22.6928	189.008	383.688	0	99.5953	0	0	0	21.1604	123.376	0	2.38058	0	0	0	5.13134	0	0	0	0	0	0	0	0	0	0	0	0	0	0	0	0	0	0	0	0	0	0	0	0	0	0	0	0	0	0	0
CA4	chr17_60156668.0_60156687.0	154.489	560.967	290.138	435.746	263.708	436.421	0	31.6003	0	76.8457	34.6994	0	13.6883	6.14065	0	68.1797	526.924	0.356142	0	27.9737	0.919583	6.33235	12.8549	1.16969	0.558357	0.985209	0	0	0	0	0	0	0	0	0	0	0	0	0	0	0	0	0	0	0	0	0	0
CA4	chr17_60157516.0_60157535.0	851.873	345.839	626.308	486.84	204.133	187.087	0	224.793	0	228.31	580.894	0	145.215	191.895	0.572165	33.093	84.9878	153.497	1.65807	13.9868	0.919583	12.6647	1008.15	1.46211	1.11671	52.2161	0	0	0	0	0	0	0	0	0	0	0	0	0	0	0	0	0	0	0	0	0	0
CA4	chr17_60158278.0_60158297.0	98.6287	50.832	272.004	421.286	98.1238	299.477	8.51374	66.0734	0	1.11371	50.1214	0	1.19029	196.501	0.572165	5.58196	0.320709	0	0.414518	0	0	0	0	67.2572	0.558357	0	0	0	0	0	0	0	0	0	0	0	0	0	0	0	0	0	0	0	0	0	0	0
CA4	chr17_60159319.0_60159338.0	176.31	104.387	502.162	755.807	342.557	524.95	4.25687	166.62	0	34.5249	41.7678	0	239.843	0	0	15.151	0.320709	0.712284	0.414518	13.9868	0.919583	0	6.1061	1.46211	1.67507	5.91126	2.36721	0	2349.95	4.33187	4.75406	0	2.6809	4.52694	2.55211	0	0	0	0	0	0	0	0	0	0	0	0	0
CA6	chr1_8945944.0_8945963.0	1023.82	746.141	759.52	655.547	807.769	1255.32	8.51374	251.366	0	870.918	459.446	0	579.075	13.8165	1.14433	641.925	6317.64	97.5829	28030.5	1188.88	73.5666	449.597	21520.1	1177.29	31.268	195.071	0	0	0	0	0	0	0	0	0	0	0	0	0	0	0	0	0	0	0	0	0	0
CA6	chr1_8949323.0_8949342.0	805.613	563.69	488.911	472.38	608.017	228.585	4.25687	754.098	0	462.188	870.698	0	113.077	1.53516	0	48.6428	1.60354	0	0.414518	0	0.919583	0	318.16	288.621	2.23343	0.985209	0	0	0	0	0	0	0	0	0	0	0	0	0	0	0	0	0	0	0	0	0	0
CA6	chr1_8949419.0_8949438.0	1170.45	1460.51	1054.54	1003.57	966.344	1305.46	17.0275	878.345	0	929.945	800.014	0	1252.18	1.02344	6.86598	898.696	1630.48	1892.9	4.97421	195.816	17.4721	139.312	904.667	5982.09	2963.76	168.471	0	0	0	0	0	0	0	0	0	0	0	0	0	0	0	0	0	0	0	0	0	0
CA6	chr1_8949421.0_8949440.0	1393.02	1499.54	1065	808.83	1922.18	2910.05	17.0275	1214.46	0	2197.34	2760.53	0	1450.96	828.476	14.8763	2079.68	7033.14	6.05442	5.38873	195.816	14.7133	82.3206	2794.34	383.366	7.25865	18.719	0	0	0	0	0	0	0	0	0	0	0	0	0	0	0	0	0	0	0	0	0	0
CA6	chr1_8957264.0_8957283.0	458.231	518.305	565.63	357.659	380.23	322.647	4.25687	1178.55	0	241.674	435.67	0	283.884	371.509	0.572165	739.211	79.2151	0.356142	0	0	2.75875	0	328.444	12.2817	0.558357	3.94084	0	0	0	9101.25	14.2622	0	5.3618	0	2.55211	0	0	0	0	0	0	0	0	0	0	0	0	0
CA6	chr1_8958981.0_8959000.0	849.254	357.639	513.321	467.559	451.194	325.414	0	487.65	0	170.397	384.906	0	182.114	81.3636	0.572165	198.558	93.9677	18.1632	0.414518	0	2.75875	6.33235	143.975	11.1121	1.11671	1.97042	0	0	0	0	0	0	0	0	0	0	0	0	0	0	0	0	0	0	0	0	0	0
CACNA1D	chr3_53660250.0_53660269.0	586.535	477.457	337.565	482.984	314.522	399.764	8.51374	285.839	0	488.917	136.87	0	53.563	294.751	0	51.4338	222.893	0.356142	0.414518	41.9605	2.75875	18.9971	1055.71	171.36	1.67507	31.5267	0	0	0	0	0	0	0	0	0	0	0	0	0	0	0	0	0	0	0	0	0	0
CACNA1D	chr3_53723961.0_53723980.0	598.755	914.068	739.992	511.905	992.628	165.646	12.7706	761.28	0	1412.18	445.309	0	521.346	205.712	198.541	233.645	23.4117	310.2	4110.36	237.776	11.035	63.3235	4065.38	111.413	18.4258	11.8225	0	0	0	0	0	0	0	0	0	0	0	0	0	0	0	0	0	0	0	0	0	0
CACNA1D	chr3_53749287.0_53749306.0	818.706	806.05	1122.19	1326.52	1303.65	1238.02	8.51374	664.325	0	811.892	1808.87	0	433.265	468.224	40.6237	1379.14	691.448	9.97198	4.55969	363.658	16.5525	170.973	5252.85	176.038	15.634	21150.5	0	0	0	0	0	0	0	0	0	0	0	0	0	0	0	0	0	0	0	0	0	0
CACNA1D	chr3_53762042.0_53762061.0	655.488	544.628	444.274	441.53	564.212	319.535	0	703.107	0	984.516	445.309	0	148.786	55.2658	1.71649	134.764	315.257	0	0.414518	0	0	6.33235	145.904	4.38634	1.11671	0	3872.75	0	1.97475	0	9.50812	5.46598	2.6809	4.52694	1.27605	0	0	0	0	0	0	0	0	0	0	0	0	0
CACNA1D	chr3_53772852.0_53772871.0	453.867	583.66	503.557	497.445	654.451	492.097	0	339.703	0	635.926	195.345	0	126.171	10.2344	12.5876	65.3887	91.7227	1.78071	0.414518	13.9868	0.919583	6.33235	11.2481	2.92422	8.93372	27.5859	0	0	0	0	0	0	0	0	0	0	0	0	0	0	0	0	0	0	0	0	0	0
CACNA1D	chr3_53786818.0_53786837.0	583.917	1083.81	704.422	669.044	685.991	1324.13	12.7706	414.395	0	501.168	616.236	0	1184.93	5.11721	30.3247	581.72	278.375	3343.46	57670.2	1049.01	85.5212	487.591	149.117	1393.39	47.4604	79.802	2.36721	0	0	0	0	0	2.6809	4.52694	0	0	0	0	0	0	0	0	0	0	0	0	0	0
CACNA1E	chr1_181511465.0_181511484.0	434.665	175.189	451.248	426.106	229.54	172.908	0	433.068	0	173.738	78.395	0	58.3241	38.379	0	108.051	4.48992	2.84914	0	0	0	0	156.83	0.292422	0	0.985209	0	0	0	0	0	0	0	0	0	0	0	0	0	0	0	0	0	0	0	0	0	0
CACNA1E	chr1_181577788.0_181577807.0	441.647	609.984	601.897	638.195	668.469	1042.98	4.25687	1502.45	0	375.319	893.188	0	551.104	8.69925	5.14948	314.982	397.679	0.712284	0	41.9605	0.919583	0	1.92824	258.209	1.11671	15.7634	0	0	0	0	0	0	0	0	0	0	0	0	0	0	0	0	0	0	0	0	0	0
CACNA1E	chr1_181719833.0_181719852.0	327.308	378.517	258.753	197.628	226.035	7.60797	8.51374	64.637	0	329.657	135.585	0	52.3727	204.688	0	3.98711	0.320709	0	11.192	0	0	0	0	2.6318	0	0	0	0	0	0	0	0	0	0	0	0	0	0	0	0	0	0	0	0	0	0	0	0
CACNA1E	chr1_181720807.0_181720826.0	935.664	1108.32	741.387	603.489	924.291	70.8925	0	581.015	0	857.554	731.258	0	167.236	342.341	7.43814	33.4918	372.984	976.542	0	13.9868	0.919583	6.33235	90.9487	141.24	0.558357	0.985209	0	0	0	0	0	0	0	0	0	0	0	0	0	0	0	0	0	0	0	0	0	0
CACNA1E	chr1_181731190.0_181731209.0	733.169	795.157	925.513	997.782	1333.43	2257.49	0	527.869	0	1061.36	501.214	0	295.192	10.2344	2.86082	847.262	538.149	182.345	6.63228	181.829	14.7133	94.9853	109.91	4306.21	5489.21	43.3492	0	0	0	0	0	0	0	0	0	0	0	0	0	0	0	0	0	0	0	0	0	0
CACNA1E	chr1_181733724.0_181733743.0	880.676	1182.75	697.447	687.361	1042.57	348.929	4.25687	634.879	0	1614.87	956.161	0	412.435	186.778	165.928	598.865	229.627	491.12	1.24355	125.882	5.5175	50.6588	253.242	327.513	3475.22	1.97042	0	0	0	0	0	0	0	0	0	0	0	0	0	0	0	0	0	0	0	0	0	0
CACNA2D1	chr7_81950488.0_81950507.0	498.38	192.435	537.034	339.342	594	123.111	4.25687	540.796	0	370.864	323.861	0	302.333	83.4104	0.572165	14.7523	72.8009	0	0.414518	27.9737	3.67833	6.33235	355.439	125.449	0	0.985209	0	0	0	0	0	0	0	0	0	0	0	0	0	0	0	0	0	0	0	0	0	0
CACNA2D1	chr7_81964075.0_81964094.0	434.665	466.565	373.134	277.644	453.823	54.9849	4.25687	676.534	0	494.486	300.728	0	145.215	34.797	14.8763	31.8969	20.2046	6.41056	0	13.9868	0.919583	0	142.047	117.261	0.558357	746.789	0	0	0	0	0	0	0	0	0	0	0	0	0	0	0	0	0	0	0	0	0	0
CACNA2D1	chr7_81982568.0_81982587.0	278.43	327.685	276.887	244.866	150.69	204.724	0	67.5098	0	4.45483	83.5356	0	148.191	57.8244	660.85	24.7201	66.7074	1.78071	0.829035	69.9342	2.75875	677.561	50.4557	49.4194	3.35014	4677.77	0	0	0	0	0	0	0	0	0	0	0	0	0	0	0	0	0	0	0	0	0	0
CACNA2D1	chr7_82005754.0_82005773.0	196.385	154.311	311.062	216.909	300.504	254.175	0	167.338	0	115.825	167.714	0	1725.32	8.69925	4.57732	175.433	476.573	0.712284	0.414518	13.9868	0.919583	6.33235	35.3511	77.1995	0	25.6154	0	0	0	0	0	0	0	0	0	0	0	0	0	0	0	0	0	0	0	0	0	0
CACNA2D1	chr7_82084773.0_82084792.0	574.316	373.978	622.123	625.662	372.345	466.853	4.25687	950.882	0	1789.73	289.804	0	280.313	714.362	2.28866	323.355	142.395	0	0.414518	13.9868	1.83917	0	36.6366	56.7299	0.558357	20.6894	0	0	0	0	0	0	0	0	0	0	0	0	0	0	0	0	0	0	0	0	0	0
CACNA2D1	chr7_82136648.0_82136667.0	147.507	24.5083	116.474	117.613	168.212	62.9387	0	25.8548	0	8.90965	20.5626	0	82.725	0	2.28866	10.7652	15.7147	0	0	0	0	0	41.1358	16.0832	0	0	0	0	0	0	0	0	0	0	0	0	0	0	0	0	0	0	0	0	0	0	0	0
CADM3	chr1_159191946.0_159191965.0	472.196	631.769	606.779	635.302	382.858	578.206	0	425.886	0	350.818	339.926	0	541.581	457.478	5.14948	253.58	450.275	174.866	179.072	13.9868	3.67833	18.9971	259.348	230.721	1.11671	30.5415	0	0	0	0	0	0	0	0	0	0	0	0	0	0	0	0	0	0	0	0	0	0
CADM3	chr1_159191994.0_159192013.0	734.915	841.451	920.631	1049.84	784.114	988.345	0	565.933	0	463.302	1659.79	0	1302.77	70.1057	1.71649	1013.52	304.994	1.06843	0.414518	27.9737	3.67833	6.33235	129.192	90.9434	0.558357	322.164	9.46884	9.21773	0	12.9956	4.75406	0	5.3618	4.52694	5369.64	6.07657	0	0	0	0	0	0	0	0	0	0	0	0
CADM3	chr1_159192041.0_159192060.0	638.032	991.224	650.021	457.919	1070.6	187.779	0	197.502	0	408.73	656.718	0	570.743	309.079	28.0361	44.257	123.473	0	453.897	13.9868	1.83917	6.33235	583.293	10.8196	0	0	2.36721	0	1.97475	0	0	0	2.6809	5255.78	1.27605	0	0	0	0	0	0	0	0	0	0	0	0	0
CADM3	chr1_159192627.0_159192646.0	526.311	636.307	537.732	504.193	731.548	729.328	4.25687	1162.75	0	536.806	314.865	0	383.868	765.022	26.3196	431.804	7.69701	108.979	0	27.9737	2.75875	12.6647	270.275	1104.19	5.58357	20.6894	0	0	0	0	0	0	0	0	0	0	0	0	0	0	0	0	0	0	0	0	0	0
CADM3	chr1_159193485.0_159193504.0	361.348	414.825	513.321	500.337	613.274	219.94	0	335.394	0	54.5716	149.722	0	92.8425	446.22	0.572165	135.961	7.05559	1.42457	1.24355	83.921	1.83917	6.33235	1445.86	30.1195	0	1.97042	0	0	0	0	0	0	0	0	248.831	0	0	0	0	0	0	0	0	0	0	0	0	0
CADM3	chr1_159193881.0_159193900.0	196.385	329.5	299.902	348.983	258.451	194.003	0	405.777	0	561.308	146.509	0	148.191	1.02344	3.43299	59.0093	43.6164	0	0.414518	0	0	0	6.42747	29.2422	0.558357	0	7.10163	13.8266	2752.8	21.6593	19.0162	16.398	13.4045	13.5808	2.55211	18.2297	0	13.3938	0	0	381.463	0	0	0	0	2.64664	0	0
CAPN11	chr6_44172345.0_44172364.0	775.937	645.385	610.266	493.589	683.362	536.362	4.25687	374.176	0	1521.32	711.98	0	229.131	2503.34	0.572165	850.451	258.812	7.47898	2.90162	265.75	26762.6	82.3206	124.372	24.2711	2741.54	13.7929	0	0	0	0	0	0	0	0	0	0	0	0	0	0	0	0	0	0	0	0	0	0
CAPN11	chr6_44173227.0_44173246.0	561.224	230.559	587.948	522.51	439.805	592.73	0	254.957	0	245.015	562.901	0	824.87	29.6798	29.1804	115.626	488.119	0	0.414518	13.9868	1.83917	0	28.6022	85.9722	0.558357	7.88168	0	0	0	0	0	0	0	0	0	0	0	0	0	0	0	0	0	0	0	0	0	0
CAPN11	chr6_44173363.0_44173382.0	457.358	777.911	398.94	455.027	539.681	91.9873	8.51374	1029.88	0	974.493	729.33	0	216.037	92.1097	1.14433	43.8583	18.2804	0	0	0	0	0	46.2778	0	0	0	0	0	0	0	0	0	0	0	0	0	0	0	0	0	0	0	0	0	0	0	0	0
CAPN11	chr6_44176244.0_44176263.0	577.807	550.075	599.805	409.717	530.92	594.459	0	1638.91	0	468.87	794.873	0	354.111	74.7112	17.7371	116.822	45.8613	53.7775	0.414518	41.9605	1.83917	12.6647	55.919	0.292422	0	2.95563	0	0	0	0	0	0	0	0	0	0	0	0	0	0	0	0	0	0	0	0	0	0
CAPN11	chr6_44180023.0_44180042.0	373.567	228.744	352.211	329.702	478.354	158.038	0	25.8548	0	149.237	227.474	0	101.175	68.0588	962.381	245.606	33.3537	0	0.414518	27.9737	2.75875	0	32.4587	290.668	1.11671	1068.95	0	0	0	0	0	2262.92	0	0	0	0	0	0	0	0	0	0	0	0	0	0	0	0
CAPN11	chr6_44183001.0_44183020.0	679.927	608.168	287.348	246.794	236.548	134.523	0	130.71	0	575.786	255.105	0	124.385	8749.91	6.29381	126.392	0.641417	1.06843	12.021	69.9342	2.75875	6.33235	27.9595	104.687	1.67507	2429.53	0	0	0	0	0	0	0	0	0	0	0	0	0	0	0	0	0	0	0	0	0	0
CAPN6	chrX_111251540.0_111251559.0	354.365	666.262	308.272	433.818	460.832	241.38	12.7706	38.064	0	318.52	646.437	0	53.563	0	0	89.3114	496.136	1.06843	0.414518	13.9868	4.59791	25.3294	14.1404	12.8666	1.67507	3225.58	0	0	0	0	0	0	0	0	0	0	0	0	0	0	0	0	0	0	0	0	0	0
CAPN6	chrX_111251541.0_111251560.0	796.885	785.172	660.483	653.619	824.415	339.938	2903.18	478.314	0	684.929	1643.72	0	108.911	1035.21	433.129	828.522	1558.97	247.163	24.4565	69.9342	8.27625	12.6647	17.0328	1471.18	7.25865	118.225	0	0	0	0	14.2622	0	13.4045	11240.4	2.55211	0	0	0	0	0	0	0	0	0	0	0	0	0
CAPN6	chrX_111252380.0_111252399.0	626.685	377.609	576.789	517.69	502.008	458.207	4.25687	220.484	0	531.238	445.952	0	4271.95	17.3985	16.0206	302.223	533.018	1.42457	118.552	27.9737	2.75875	18.9971	58.1686	284.235	1.11671	1036.44	0	0	0	0	0	0	0	0	0	0	0	0	0	0	0	0	0	0	0	0	0	0
CAPN6	chrX_111252457.0_111252476.0	714.84	471.103	400.335	345.126	601.884	223.052	8.51374	428.041	0	330.771	1074.4	0	197.588	35.3087	0	131.973	101.344	0	0.414518	13.9868	1.83917	12.6647	359.296	247.097	0.558357	0.985209	0	0	0	0	0	0	0	0	0	0	0	0	0	0	0	0	0	0	0	0	0	0
CAPN6	chrX_111253070.0_111253089.0	1548.38	1590.31	1005.72	1002.6	1148.57	659.473	0	1467.98	12585.9	753.979	602.742	0	999.842	79.8284	73.8093	1627.94	342.838	0.712284	0.829035	41.9605	5.5175	18.9971	51.7411	142.41	2.23343	20.6894	0	0	0	0	0	0	0	778.634	0	0	0	0	0	0	0	0	0	0	0	2.64664	2.95957	0
CAPN6	chrX_111254366.0_111254385.0	1045.64	1249.92	671.642	599.633	709.645	982.12	4.25687	693.77	0	712.772	793.588	0	213.657	394.537	0	1247.57	286.393	1.78071	1.65807	27.9737	2.75875	37.9941	357.689	223.118	1.67507	17.7338	0	0	0	0	0	0	0	0	0	0	0	0	0	0	0	0	0	0	0	0	0	0
CAPZA3	chr12_18738322.0_18738341.0	802.995	428.441	418.468	290.176	516.026	125.877	0	765.589	0	760.661	488.362	0	461.832	151.981	0	284.281	407.941	1.06843	24.4565	13.9868	3.67833	18.9971	1280.35	101.763	0.558357	1.97042	0	0	0	0	0	0	0	0	0	0	0	0	0	0	0	0	0	0	0	0	0	0
CAPZA3	chr12_18738389.0_18738408.0	593.518	426.626	545.404	414.537	666.716	143.86	263.926	665.043	0	379.774	670.213	0	797.493	1198.96	0.572165	276.706	120.266	0	0.414518	0	0	0	28.9236	126.619	0	1.97042	0	0	0	0	0	0	0	0	0	0	0	0	0	0	0	0	0	0	0	0	0	0
CAPZA3	chr12_18738492.0_18738511.0	868.456	701.663	645.836	514.797	1109.15	537.745	17.0275	669.352	0	661.542	1096.24	0	893.907	257.395	2.28866	633.154	1467.24	59.8319	49.7421	13.9868	2.75875	31.6618	128.871	465.536	4.46686	43.3492	0	0	0	0	0	0	0	0	0	0	0	0	0	0	0	0	0	0	0	0	0	0
CAPZA3	chr12_18738744.0_18738763.0	392.769	186.081	405.217	326.81	522.159	638.724	4.25687	869.727	0	96.8925	430.53	0	242.224	3.58204	5.72165	66.9835	145.922	0	0.414518	0	1.83917	6.33235	55.2763	12.2817	1.67507	0.985209	0	0	0	0	0	0	0	0	0	0	0	0	0	0	0	0	0	0	0	0	0	0
CAPZA3	chr12_18738805.0_18738824.0	166.709	161.573	187.613	191.844	336.425	50.8351	0	109.165	0	96.8925	23.7755	0	69.0367	22.004	0	21.9291	13.1491	0	0	0	0	0	378.257	3.50907	0.558357	0.985209	0	0	0	0	0	0	0	0	0	0	0	0	0	0	0	0	0	0	0	0	0	0
CAPZA3	chr12_18738818.0_18738837.0	1041.27	1134.64	647.231	697.001	590.495	150.085	21.2843	6138.36	0	349.704	764.672	0	1015.91	9.72269	8.58247	192.976	14.4319	124.294	0.414518	13.9868	0.919583	0	281.202	35.6755	1.11671	17.7338	0	0	0	0	0	0	0	0	0	0	0	0	0	0	0	0	0	0	0	0	0	0
CARD11	chr7_2910057.0_2910076.0	822.197	746.141	659.785	532.15	623.787	357.575	4.25687	717.471	0	282.881	285.949	0	626.092	147.887	5.14948	87.7165	228.665	0.356142	0.829035	27.9737	0	6.33235	20.8893	44.7406	0	0.985209	0	0	0	0	0	0	0	0	0	0	0	0	0	0	0	0	0	0	0	0	0	0
CARD11	chr7_2928616.0_2928635.0	616.211	787.896	673.734	671.936	728.92	701.663	8.51374	269.321	0	993.426	505.712	0	279.123	41.4494	0.572165	343.291	101.665	0.356142	0.829035	27.9737	0.919583	18.9971	135.941	222.826	0	8.86689	2.36721	0	0	0	9.50812	12965.3	2.6809	9.05389	2.55211	6.07657	0	0	0	0	0	0	0	0	0	0	0	0
CARD11	chr7_2937108.0_2937127.0	529.802	734.341	652.113	455.027	599.256	495.556	5589.27	191.756	43.6003	387.57	174.14	743478	1733.06	6.14065	1218.14	215.703	23.7324	0.356142	0.414518	83.921	2.75875	31.6618	218.534	1042.78	1.11671	55.1717	9.46884	13.8266	57.2678	8.66373	5353.07	158.514	9619.06	1158.9	3408.34	15155	1.80081	2451.06	0	811.568	43.0081	5.12479	4887.48	0	682.04	2358.15	9701.48	1.83908
CARD11	chr7_2938025.0_2938044.0	720.077	777.911	506.347	459.847	426.663	436.421	4.25687	621.952	0	129.19	299.443	0	61.895	148.399	1903.59	98.8804	6283.65	1.42457	28.1872	55.9473	8.27625	7301.2	139.798	5.84845	1.67507	21.6746	0	0	0	0	0	0	0	0	0	0	0	0	0	0	0	0	0	0	0	0	0	0
CARD11	chr7_2938767.0_2938786.0	727.932	1070.19	703.724	986.213	962.84	894.283	8.51374	824.481	0	913.239	415.75	0	2097.88	2112.89	786.727	723.661	395.113	4.98599	6.63228	181.829	18.3917	94.9853	2621.77	927.271	6723.74	2970.41	0	0	0	0	0	0	0	0	0	0	0	0	0	0	0	0	0	0	0	0	0	0
CARD11	chr7_2944258.0_2944277.0	1532.67	1013.01	1044.78	1522.22	1363.22	2249.54	8.51374	1023.42	0	1250.69	998.572	0	1659.26	209.805	6.29381	1259.53	1028.51	7.47898	3.31614	125.882	11.9546	75.9882	597.112	628.416	8443.48	399.01	0	0	0	0	0	0	0	0	0	0	0	0	0	0	0	0	0	0	0	0	0	0
CASC5	chr15_40621419.0_40621438.0	356.984	227.836	465.895	565.892	288.239	173.254	8.51374	147.947	0	22.2741	276.953	0	183.304	0.511721	0	158.687	0	0	0	0	0.919583	0	2.57099	0.292422	0	0.985209	0	0	0	0	0	0	0	0	0	0	0	0	0	0	0	0	0	0	0	0	0	0
CASC5	chr15_40622269.0_40622288.0	32.2944	304.992	348.724	431.89	312.77	122.419	0	226.948	0	61.2539	74.5395	0	27.3766	0	0.572165	8.77165	1.60354	65.8863	0	0	0	0	0.321374	4.09391	0	0.985209	0	0	0	0	0	0	0	0	0	0	0	0	0	0	0	0	0	0	0	0	0	0
CASC5	chr15_40622763.0_40622782.0	417.208	152.496	171.572	207.269	266.336	29.7403	0	21.5457	0	47.8894	57.1898	0	125.575	65.5002	0	16.3472	110.003	0	0	0	0	0	287.308	0.584845	0	0	0	0	0	0	0	0	0	0	0	0	0	0	0	0	0	0	0	0	0	0	0	0
CASC5	chr15_40623225.0_40623244.0	53.242	135.249	326.405	421.286	169.088	301.207	4.25687	379.922	0	47.8894	211.409	0	142.835	1618.57	3.43299	417.052	10.9041	0	1.24355	0	0.919583	18.9971	11.8908	23.1014	0	0.985209	9.46884	0	5.92425	12.9956	28757.3	10.932	8.04269	9.05389	2.55211	0	0	0	0	0	0	0	0	0	0	0	0	0
CASQ2	chr1_115726993.0_115727012.0	377.931	157.942	435.207	495.517	366.212	273.887	0	591.788	0	326.316	128.516	0	76.1785	25.0743	4.00515	22.3278	1783.46	0.356142	1.24355	13.9868	0	0	4.49923	11.9893	0	2.95563	0	0	0	0	0	0	0	0	0	0	0	0	0	0	106.585	0	0	0	0	0	0	0
CASQ2	chr1_115727025.0_115727044.0	315.088	323.146	493.095	571.676	433.672	182.246	0	265.73	0	103.575	199.843	0	127.361	650.397	0	117.221	4.48992	1.06843	0.414518	13.9868	1.83917	0	215.963	0	0	22.6598	0	0	0	0	0	0	0	0	0	0	0	0	0	0	0	0	0	0	0	0	0	0
CASQ2	chr1_115732895.0_115732914.0	69.8256	156.127	293.625	497.445	278.602	172.563	4.25687	232.693	0	14.4782	282.736	0	1090.9	46.5666	0.572165	52.6299	2.56567	0	0	0	0	0	6.74885	2.04696	0	0	0	0	0	0	0	0	0	0	0	0	0	0	0	0	0	0	0	0	0	0	0	0
CASQ2	chr1_115744869.0_115744888.0	422.445	775.188	564.932	423.214	498.504	98.5578	0	266.448	0	168.17	235.185	0	449.334	62.9416	0.572165	104.861	58.0483	0.356142	0	0	0	6.33235	195.074	39.7694	9.49208	2.95563	0	0	0	0	0	0	0	0	0	0	0	0	0	0	0	0	0	0	0	0	0	0
CASQ2	chr1_115768361.0_115768380.0	452.121	205.143	631.887	629.518	516.902	705.467	0	144.356	0	162.601	373.34	0	810.586	225.669	1.14433	163.073	29.1845	0.356142	0	0	0.919583	6.33235	10.6053	36.2604	0.558357	2.95563	0	0	0	0	0	0	0	0	389.196	0	0	0	0	0	0	0	0	0	0	0	0	0
CASQ2	chr1_115768445.0_115768464.0	713.094	767.926	695.355	742.311	967.22	651.173	0	657.143	0	631.472	1378.98	0	983.773	75.7346	9.15464	177.825	242.135	947.338	0.829035	0	2.75875	18.9971	230.103	71.6435	1.11671	3.94084	0	0	0	0	0	0	0	0	0	0	0	0	0	0	0	0	0	0	0	0	0	0
CAV1	chr7_116526563.0_116526582.0	237.407	285.93	219.696	443.458	261.079	139.364	0	89.7736	0	491.145	128.516	0	117.839	10.7461	1.14433	33.8905	34.9572	0	0	0	0	0	15.1046	0	0	0	0	0	0	0	0	0	0	0	0	0	0	0	0	0	0	0	0	0	0	0	0	0
CAV1	chr7_116526626.0_116526645.0	805.613	738.879	795.09	747.131	970.725	2101.53	4.25687	749.789	0	1049.11	400.328	0	548.128	30.1915	3.43299	2598.4	1314.58	1501.14	3.73066	153.855	9.19583	44.3265	464.385	1099.22	6.14193	44.3344	0	0	0	0	0	0	0	0	0	0	0	0	0	0	0	0	0	0	0	0	0	0
CAV1	chr7_116526662.0_116526681.0	861.474	662.631	631.887	629.518	767.468	1377.04	8.51374	333.24	0	180.42	721.619	0	255.317	54.2424	0.572165	962.888	171.258	241.108	0.414518	13.9868	5.5175	25.3294	115.694	158.493	1.67507	5.91126	0	0	0	0	0	0	0	0	0	0	0	0	0	0	0	0	0	0	0	0	0	0
CAV1	chr7_116558959.0_116558978.0	440.774	350.378	408.007	456.955	549.318	123.457	0	483.341	0	123.621	136.227	0	248.77	20.4688	7.43814	33.093	72.4802	0.356142	0.414518	13.9868	0	0	369.258	18.1302	0	1.97042	0	0	0	0	0	0	0	0	0	0	0	0	0	0	0	0	0	0	0	0	0	0
CAV1	chr7_116559052.0_116559071.0	600.5	391.225	548.194	531.186	522.159	278.383	4.25687	680.843	0	243.902	879.694	0	592.169	68.5706	1.71649	121.607	94.2884	215.11	0.829035	0	1.83917	12.6647	14.7832	252.361	0.558357	0	0	0	0	0	0	0	0	0	0	0	0	0	0	0	0	0	0	0	0	0	0	0
CAV1	chr7_116559111.0_116559130.0	417.208	486.535	351.513	346.09	185.734	161.151	4.25687	61.7642	0	386.456	110.524	0	53.563	1.02344	1.14433	245.208	1.60354	155.634	0.414518	0	0.919583	0	35.0297	0.292422	0.558357	0.985209	0	0	0	0	0	0	0	0	0	0	0	0	0	0	0	0	0	0	0	0	0	0
CBFB	chr16_67029475.0_67029494.0	1077.93	835.097	678.616	613.13	687.743	2422.79	0	693.77	0	287.336	884.835	0	630.853	113.09	10.299	4125.47	2534.88	461.204	4.14518	83.921	7.35666	56.9912	368.294	721.991	13.9589	22.6598	0	0	0	0	0	0	0	0	0	0	0	0	0	0	0	0	0	0	0	0	0	0
CBFB	chr16_67029718.0_67029737.0	352.619	542.813	514.716	721.102	450.318	750.077	4.25687	606.151	0	397.593	233.9	0	514.8	64.4768	3.43299	208.925	667.716	0.712284	1.65807	27.9737	4.59791	37.9941	91.9128	11.1121	2.23343	5640.32	0	0	0	0	0	0	0	0	0	0	0	0	0	0	0	0	0	0	0	0	0	0
CBFB	chr16_67029803.0_67029822.0	983.669	467.473	765.1	658.439	629.044	630.078	4.25687	1743.76	0	242.788	319.363	1058.4	174.377	79.3167	1219.86	299.034	1603.22	1606.2	1.24355	41.9605	2.75875	37.9941	364.438	112.875	1.67507	28.5711	0	0	0	0	0	0	0	0	0	0	0	0	0	0	0	0	0	0	0	0	0	0
CBFB	chr16_67036716.0_67036735.0	597.009	369.44	684.893	558.179	914.654	623.162	4.25687	104.856	0	294.018	187.634	0	135.693	205.2	12.0155	290.262	124.435	349.019	0	27.9737	0.919583	0	344.191	7.89541	2.79179	0.985209	0	0	0	0	0	0	0	0	0	0	0	0	0	0	0	0	0	0	0	0	0	0
CBFB	chr16_67066712.0_67066731.0	891.15	773.372	641.652	536.97	560.708	137.635	4.25687	344.731	0	733.933	1049.34	0	214.252	78.2932	91.5464	94.4946	139.188	4467.09	2110.72	167.842	9.19583	56.9912	393.683	37.4301	3.9085	3.94084	4.73442	0	0	0	0	0	0	0	0	0	0	0	0	0	0	0	0	0	0	5.29327	0	1.83908
CBFB	chr16_67066735.0_67066754.0	514.091	941.299	544.009	535.042	871.725	186.05	4.25687	740.453	0	2550.39	727.402	0	231.511	46.5666	1.14433	2084.06	1649.4	1.42457	1745.12	251.763	7.35666	44.3265	504.235	140.363	2343.43	9.85209	0	0	0	0	0	0	0	0	0	0	0	0	0	0	0	0	0	0	0	0	0	0
CCAR2	chr8_22607276.0_22607295.0	254.864	165.204	682.104	715.318	421.407	439.187	0	913.536	0	129.19	290.447	0	400.532	195.989	3026.18	229.658	703.956	1.06843	0.829035	13.9868	4.59791	25.3294	300.484	483.082	2.23343	81.7724	0	0	0	0	0	0	0	0	0	0	0	0	0	0	0	0	0	0	0	0	0	0
CCAR2	chr8_22613028.0_22613047.0	164.963	106.203	237.83	289.212	348.69	205.415	0	30.8821	0	174.852	70.0414	0	329.71	92.1097	0	1984.39	243.739	1.06843	0.414518	0	1.83917	25.3294	155.223	13.159	1.11671	1.97042	0	0	0	0	0	0	0	0	0	0	0	0	0	0	0	0	0	0	0	0	0	0
CCAR2	chr8_22614136.0_22614155.0	535.912	185.174	424.745	223.657	488.867	96.8287	4.25687	223.357	0	199.353	250.607	0	1127.2	421.146	5.72165	235.24	229.307	2.13685	0.829035	41.9605	2.75875	25.3294	1089.78	739.829	1233.41	23.645	0	0	0	0	0	0	0	0	0	0	0	0	0	0	0	0	0	0	0	0	0	0
CCAR2	chr8_22614145.0_22614164.0	665.089	599.091	564.235	506.121	453.823	161.842	4.25687	255.675	0	1261.83	3962.16	0	981.988	838.198	7.43814	525.502	1346.98	211.192	4.55969	237.776	26303.8	107.65	668.457	76.9071	12.8422	4067.93	0	0	0	0	0	0	0	0	0	0	0	0	0	0	0	0	0	0	0	0	0	0
CCAR2	chr8_22614298.0_22614317.0	651.997	711.648	565.63	459.847	682.486	415.326	4.25687	654.988	0	1045.77	1975.94	0	3120.94	22.5157	14.3041	678.208	477.215	456.218	14.9226	195.816	8.27625	75.9882	802.148	6304.04	2217.8	264.036	0	0	0	0	0	0	0	0	0	0	0	0	0	0	0	0	0	0	0	0	9130.28	1.83908
CCAR2	chr8_22615780.0_22615799.0	909.479	973.069	567.025	543.719	942.69	458.899	4.25687	644.215	0	824.143	1046.12	0	2541.27	4.60548	346.732	188.192	494.854	0.712284	0.829035	13.9868	1.83917	25.3294	374.4	660.29	5.58357	3.94084	0	0	0	0	0	0	0	0	0	0	0	0	0	0	0	0	0	0	0	2.64664	2.95957	3334.24
CCDC178	chr18_33245336.0_33245355.0	92.519	102.572	193.89	283.428	255.823	52350.5	0	174.52	0	275.085	54.6194	0	98.1988	0.511721	0	20.733	182.483	7.83513	6.63228	251.763	22.9896	158.309	133.691	8.18783	10.0504	14.7781	0	0	0	0	0	0	0	0	0	0	0	0	0	0	0	0	0	0	0	0	0	0
CCDC178	chr18_33333221.0_33333240.0	679.927	571.86	500.767	475.272	680.734	219.594	12.7706	158.72	0	453.279	428.602	0	158.308	125.883	0	279.098	200.443	105.062	2.07259	27.9737	0.919583	6.33235	278.31	50.5891	0.558357	0.985209	0	0	0	0	0	0	0	0	0	0	0	0	0	0	0	0	0	0	0	0	0	0
CCDC178	chr18_33346327.0_33346346.0	178.928	345.839	331.288	180.276	187.487	85.071	4.25687	216.175	0	227.196	138.155	0	1558.68	49.6369	10.299	36.6815	2.24496	126.787	0.414518	69.9342	2.75875	0	325.23	0.877267	0.558357	2721.15	0	0	0	0	0	0	0	0	0	0	0	0	0	0	0	0	0	0	0	0	0	0
CCDC178	chr18_33370116.0_33370135.0	676.436	358.547	300.6	282.464	298.752	31.1235	0	375.613	0	593.606	275.025	0	142.239	50.6603	0	2.79098	0	0	0	0	0	0	3.21374	21.3468	0	9.85209	0	0	0	0	0	0	0	0	0	0	0	0	0	0	0	0	0	0	0	0	0	0
CCDC178	chr18_33389541.0_33389560.0	41.0226	91.6791	149.951	156.175	193.619	29.7403	0	132.147	0	86.8691	114.38	0	59.5144	3.07032	4.57732	28.7072	7.05559	94.7338	0	0	0	0	0	66.3799	0	0	0	0	0	0	0	0	0	0	0	0	0	0	0	0	0	0	0	0	0	0	0	0
CCDC178	chr18_33389601.0_33389620.0	542.894	621.784	608.872	435.746	645.69	161.151	0	711.007	0	892.079	456.233	0	117.839	59.3596	0	42.2634	95.8919	0	0.414518	13.9868	0	0	36.6366	1.75453	0	14.7781	0	0	0	0	0	0	0	0	0	0	0	0	0	0	0	0	0	0	0	0	0	0
CCL14	chr17_35984377.0_35984396.0	1125.07	1756.43	844.609	660.367	1055.71	647.023	21.2843	967.4	0	823.029	578.966	0	737.384	1521.86	377.629	427.02	109.682	5.69827	0.829035	167.842	8.27625	37.9941	3763.28	195.631	10.6088	475.856	0	0	0	0	0	0	0	0	0	0	0	0	0	0	0	0	0	0	0	0	0	0
CCL14	chr17_35984378.0_35984397.0	405.862	549.167	429.628	323.917	636.929	448.179	12.7706	850.336	0	453.279	536.556	0	807.611	233.345	0	157.491	3.5278	0.712284	0	0	0	18.9971	358.974	107.904	1.11671	15.7634	2.36721	4.60887	1030.82	4.33187	4.75406	0	0	0	0	0	0	0	0	0	0	0	0	0	0	0	331.472	0
CCL14	chr17_35984390.0_35984409.0	712.221	626.323	638.862	561.071	1078.49	293.944	8.51374	2348.48	0	448.824	848.85	0	1859.23	22.004	111.572	155.497	282.224	805.237	0.829035	27.9737	3.67833	18.9971	269.954	651.81	0.558357	16.7486	0	0	0	0	0	0	0	0	0	0	0	0	0	0	0	0	0	0	0	0	0	0
CCL14	chr17_35984397.0_35984416.0	920.826	1239.94	652.113	669.044	685.115	207.144	0	1027.73	0	929.945	940.097	0	950.445	101.832	0	90.9062	15.394	183.769	0	0	0.919583	6.33235	247.136	43.8634	0.558357	0.985209	0	0	0	0	0	0	0	0	0	0	0	0	0	0	0	0	0	0	0	0	0	0
CCL14	chr17_35984415.0_35984434.0	693.019	806.958	595.62	739.419	933.928	699.933	8.51374	282.248	0	238.333	864.272	0	164.26	80.8518	0	531.084	137.584	0.356142	0.414518	83.921	0.919583	0	344.834	115.214	2.23343	5.91126	0	0	0	0	0	0	0	0	0	0	0	0	0	0	0	0	0	0	0	0	0	0
CCL14	chr17_35984420.0_35984439.0	746.261	672.616	553.076	608.309	574.725	175.675	0	49.555	0	492.258	125.946	0	191.041	264.048	25228.5	51.0351	140.15	236.478	9.94842	237.776	43689.4	202.635	14.1404	15.206	15.634	1777.32	0	0	0	0	0	0	0	0	0	0	0	0	0	0	0	0	0	0	0	0	0	0
CCL21	chr9_34709653.0_34709672.0	1434.92	1155.52	986.888	824.254	1325.55	1031.92	17.0275	812.272	0	909.898	1276.81	0	742.74	177.055	3.43299	649.9	665.791	278.147	2.07259	83.921	3.67833	12.6647	359.296	1565.92	8.37536	5.91126	0	0	0	0	0	0	0	0	0	0	0	0	0	0	0	0	0	0	0	0	0	0
CCL21	chr9_34709766.0_34709785.0	666.835	672.616	953.411	1076.83	1021.54	954.455	0	621.233	0	405.389	538.483	0	1123.63	750.182	4.00515	431.007	217.761	10.6843	2.90162	111.895	11.9546	88.6529	113.766	3150.85	5854.94	60.0978	0	0	0	0	0	0	0	0	0	0	0	0	0	0	0	0	0	0	0	0	0	0
CCL21	chr9_34709786.0_34709805.0	731.424	1155.52	700.935	707.605	520.407	411.176	8.51374	2060.48	0	716.113	1102.03	0	166.64	10.2344	1.71649	143.536	86.2706	0.356142	0	0	0	0	39.2076	27.1953	0.558357	0.985209	0	0	0	0	0	0	0	0	0	0	0	0	0	0	0	0	0	0	0	0	0	0
CCL21	chr9_34709837.0_34709856.0	1404.37	1534.94	934.579	881.133	1095.13	476.19	12.7706	749.789	0	641.495	871.983	0	375.536	1000.41	5.14948	228.063	750.779	2.49299	1.24355	69.9342	4.59791	31.6618	825.287	1863.32	10.0504	48.2753	0	0	0	0	0	0	0	0	0	0	0	0	0	0	0	0	0	0	0	0	0	0
CCL21	chr9_34709847.0_34709866.0	700.875	1111.04	767.89	553.359	999.636	523.221	8.51374	349.04	0	432.118	1062.19	0	282.098	158.122	0.572165	570.157	366.57	128.923	2.90162	83.921	8.27625	31.6618	336.8	1633.18	15.634	3302.42	0	0	0	0	0	0	0	0	0	0	0	0	0	0	0	0	0	0	0	0	0	0
CCL21	chr9_34709853.0_34709872.0	891.15	464.75	785.326	1005.49	698.256	1116.99	4.25687	874.754	0	1061.36	1247.89	0	210.681	10.7461	457.732	2290.2	285.11	3.91756	4.55969	153.855	14.7133	94.9853	591.327	656.781	5.02522	7650.15	0	0	0	0	0	0	0	0	0	0	0	0	0	0	0	0	0	0	0	0	0	0
CCL28	chr5_43381994.0_43382013.0	754.99	550.982	291.533	248.722	370.593	358.958	0	107.01	0	449.937	75.8246	0	51.1824	128.442	0	112.437	71.1973	0	0	0	0	6.33235	30.5305	5.55603	0	10.8373	0	0	0	0	0	0	0	0	0	0	0	0	0	0	0	0	0	0	0	0	0	0
CCL28	chr5_43381996.0_43382015.0	1269.08	1482.3	1047.57	1214.69	1470.98	994.915	12.7706	1312.13	0	2471.31	1196.49	0	843.915	815.171	13.732	846.066	201.726	190.892	3.73066	125.882	6.43708	44.3265	642.426	1147.76	2825.29	306.4	0	0	0	0	0	0	0	0	0	0	0	0	0	0	0	0	0	0	0	0	0	0
CCL28	chr5_43388362.0_43388381.0	777.683	414.825	604.687	591.921	802.513	469.619	0	765.589	0	749.524	417.035	0	478.496	650.909	0.572165	344.885	339.31	0.356142	1.24355	27.9737	1.83917	12.6647	39.2076	121.063	0	276.844	0	0	0	0	0	0	0	0	0	0	0	0	0	0	0	0	0	0	0	0	0	0
CCL28	chr5_43388375.0_43388394.0	514.091	812.404	500.767	551.431	727.168	803.679	17.0275	780.671	0	736.16	2060.76	0	244.604	71.6409	20.5979	420.242	105.834	336.91	0.414518	13.9868	0.919583	0	113.445	114.63	12.8422	4.92605	0	0	0	0	0	0	0	0	0	0	0	0	0	0	0	0	0	0	0	0	0	0
CCL28	chr5_43388439.0_43388458.0	383.168	530.105	610.266	453.099	819.159	883.562	4.25687	335.394	0	968.925	1401.47	0	320.188	98.7621	48022.4	517.129	153.299	83.6934	14.5081	321.697	24925.3	113.982	47.8847	5.2636	3099.44	4814.72	0	0	0	0	0	0	0	0	0	0	0	26.7876	0	0	0.934958	2.56239	0	6377.97	5.22636	0	0	0
CCL28	chr5_43388443.0_43388462.0	499.253	437.518	504.952	637.231	482.734	329.909	4.25687	12.2092	0	128.076	627.16	0	97.6037	261.489	0	47.0479	25.336	0.356142	374.309	13.9868	0	6.33235	73.5946	54.9754	0	1.97042	0	0	0	0	0	0	0	0	1.27605	0	0	0	0	0	0	0	0	0	0	0	0	0
CD300LG	chr17_43848583.0_43848602.0	827.434	1091.98	630.492	547.575	622.911	160.113	4.25687	374.176	0	192.671	1162.43	0	110.697	354.622	640.252	273.915	33.3537	2881.55	2.07259	55.9473	6.43708	56.9912	25.7099	9.94236	2.23343	2118.2	0	0	0	0	0	0	0	0	0	0	0	0	0	0	0	0	0	0	0	0	0	0
CD300LG	chr17_43848651.0_43848670.0	545.513	810.588	689.775	668.08	837.557	562.99	8.51374	1470.85	0	311.838	218.478	0	195.207	0.511721	6.86598	691.366	124.435	0.712284	0.414518	41.9605	0.919583	12.6647	232.996	245.635	0.558357	1.97042	0	0	0	0	0	0	0	0	0	0	0	0	0	0	0	0	0	0	0	0	0	0
CD300LG	chr17_43848768.0_43848787.0	822.197	1227.23	887.851	1018.99	1088.12	422.588	21.2843	369.867	0	748.411	490.29	0	2557.33	4.60548	171.649	96.4882	242.456	0	0	13.9868	1.83917	0	119.872	56.7299	6.70029	0.985209	0	0	0	0	0	0	0	0	0	0	0	0	0	0	0	0	0	0	0	0	0	0
CD300LG	chr17_43848830.0_43848849.0	572.57	414.825	288.046	252.579	575.601	118.961	0	416.55	0	356.386	262.173	0	94.6279	123.325	0.572165	157.491	208.14	0	0.414518	27.9737	0	6.33235	657.53	4.09391	0.558357	0	0	0	0	0	0	0	0	0	0	0	0	0	0	0	0	0	0	0	0	0	0	0
CD300LG	chr17_43853902.0_43853921.0	341.273	226.928	548.891	557.215	415.274	529.446	4.25687	779.953	0	722.795	194.702	0	170.806	34.797	0.572165	34.2892	774.512	0.356142	0.829035	13.9868	0.919583	6.33235	32.7801	2.92422	0	17.7338	0	0	0	0	0	0	0	0	0	0	0	0	0	0	0	0	0	0	0	0	0	0
CD300LG	chr17_43855260.0_43855279.0	545.513	619.969	794.393	499.373	859.46	384.894	8.51374	916.409	0	4743.28	493.503	0	545.747	822.335	3.43299	83.7294	208.781	4.62985	7799.15	139.868	11.9546	44.3265	334.871	115.507	8.93372	12.8077	0	0	0	0	0	0	0	0	0	0	0	0	0	0	0	0	0	0	0	0	0	0
CD36	chr7_80661142.0_80661161.0	432.919	439.334	545.404	438.638	652.699	160.459	4.25687	180.984	0	210.491	389.404	0	413.03	5333.66	163.639	139.948	25.9774	0.356142	0	0	0	0	10.6053	71.9359	0.558357	20.6894	0	0	0	0	0	0	0	0	0	0	0	0	0	0	0	0	0	0	0	0	0	0
CD36	chr7_80661153.0_80661172.0	462.595	580.937	530.757	426.106	536.177	460.282	4.25687	634.161	0	495.599	1020.42	0	194.612	204.176	0	286.674	41.0507	0.712284	0.414518	13.9868	0.919583	12.6647	979.868	56.1451	1.67507	1.97042	0	0	0	0	0	0	0	0	0	0	0	0	0	0	0	0	0	0	0	0	0	0
CD36	chr7_80663138.0_80663157.0	938.282	654.462	805.552	824.254	1005.77	674.343	0	329.649	0	1180.53	176.71	0	775.473	780.374	1.14433	381.966	563.164	53.4213	0.414518	13.9868	1.83917	25.3294	109.588	117.846	2.23343	6.89647	0	0	0	0	0	0	0	0	0	0	0	0	0	0	0	0	0	0	0	0	0	0
CD36	chr7_80666468.0_80666487.0	746.261	409.379	739.294	806.902	627.292	944.08	4.25687	452.459	0	1701.74	384.264	0	792.137	1021.39	1.14433	7278.88	565.73	58.0512	2.90162	27.9737	9.19583	69.6559	572.688	13.7439	5.02522	6.89647	0	0	0	0	0	0	0	0	0	0	0	0	0	0	0	0	0	0	0	0	0	0
CD36	chr7_80671002.0_80671021.0	99.5015	221.482	285.953	241.974	345.186	244.838	0	550.133	0	206.036	477.438	0	191.041	12.2813	149.335	120.81	4713.14	1.06843	0.829035	41.9605	0	25.3294	338.406	50.8815	88.2205	7.88168	0	0	0	0	0	0	0	0	0	0	0	0	0	0	0	0	0	0	0	0	0	0
CDH1	chr16_68801844.0_68801863.0	2099.13	2061.42	1998.88	1881.81	2410.17	3886.29	8.51374	3188.04	0	2926.82	3489.22	0	2182.99	405.794	1554.57	1766.29	1929.38	186.262	4.97421	139.868	7.35666	50.6588	540.55	1026.4	13.9589	16.7486	0	0	0	0	0	0	0	0	0	0	0	0	0	0	0	0	0	0	0	0	0	0
CDH1	chr16_68808818.0_68808837.0	1246.39	739.787	1348.86	1918.44	1470.98	1420.96	0	1309.98	0	472.212	309.082	0	1427.75	1660.02	8.01031	452.139	5.77276	0.712284	0.414518	0	0.919583	25.3294	18.961	16.0832	0	16.7486	0	9.21773	0	4.33187	4.75406	5.46598	0	0	4994.48	6.07657	0	0	0	0	0	0	0	0	0	0	0	0
CDH1	chr16_68811697.0_68811716.0	1282.17	1246.29	1510.67	1744.91	1534.06	1285.06	8.51374	346.885	0	644.836	408.682	0	323.163	281.958	52.6392	480.846	100.703	105.062	0.414518	13.9868	0.919583	12.6647	46.5992	1.75453	1.67507	20.6894	0	0	0	0	0	0	0	0	0	0	0	0	0	0	0	0	0	0	0	0	0	0
CDH1	chr16_68812143.0_68812162.0	1707.24	1826.32	1687.82	1694.78	1455.21	1584.88	0	703.107	0	2421.2	2092.89	0	455.285	382.255	3484.48	366.017	292.486	1.78071	25.7001	83.921	0.919583	25.3294	412.965	1470.59	3.9085	62.0682	0	0	0	0	0	0	0	0	0	0	0	0	0	0	0	0	0	0	0	0	0	0
CDH1	chr16_68815608.0_68815627.0	4207.87	5586.98	2647.51	2837.17	3872.39	4785.07	21.2843	3853.8	0	3473.65	2484.22	0	4661.17	829.499	213.417	3446.86	3287.26	251.436	3568.17	587.447	11476.4	278.623	446.388	686.608	6537.25	19797.8	0	0	0	0	0	0	0	0	0	0	0	0	0	0	0	0	0	0	0	0	0	0
CDH1	chr16_68819311.0_68819330.0	825.688	1223.6	1380.95	1446.06	1127.55	483.106	21.2843	1465.82	0	369.751	941.382	0	737.979	1889.78	3.43299	159.883	370.739	272.449	166.636	27.9737	0.919583	25.3294	342.906	28.365	0.558357	0	0	0	0	0	0	0	0	0	0	0	0	0	0	0	0	0	0	0	0	0	0	0
CDH20	chr18_61490779.0_61490798.0	749.753	1072.92	470.777	478.164	429.292	675.726	4.25687	678.689	0	679.361	401.613	0	143.43	40.9376	239.165	1118.78	409.866	0.712284	0	13.9868	0.919583	31.6618	91.2701	11.1121	1.11671	2.95563	0	0	0	0	0	0	0	0	0	0	0	0	0	0	0	0	0	0	0	0	0	0
CDH20	chr18_61499276.0_61499295.0	803.868	771.557	635.375	627.59	718.407	733.824	0	191.038	0	318.52	866.2	0	499.921	10760.5	9282.23	364.821	676.695	1.06843	53.0583	13.9868	4.59791	12.6647	0	459.103	0.558357	112.314	4.73442	4.60887	1.97475	12.9956	9.50812	16.398	13029.2	13.5808	7.65632	12.1531	0	0	0	0	0	0	0	0	0	0	0	0
CDH20	chr18_61500430.0_61500449.0	1580.68	1685.62	1269.35	1054.66	1626.93	2378.53	4.25687	1521.12	0	1693.95	2871.7	0	924.259	101.321	19.4536	2477.99	1215.49	100.076	2.90162	111.895	10.1154	56.9912	1373.23	1119.1	3.35014	48.2753	0	0	0	0	0	0	0	0	0	0	0	0	0	0	0	0	0	0	0	0	0	0
CDH20	chr18_61507402.0_61507421.0	1163.47	944.022	1005.02	963.076	1115.28	1131.51	8.51374	1585.04	0	415.412	555.833	0	287.455	545.494	1851.53	476.859	962.126	7.47898	2.07259	69.9342	4.59791	31.6618	836.857	14.6211	2.23343	7.88168	0	0	0	0	0	0	0	0	0	0	0	0	0	0	0	0	0	0	0	0	0	0
CDH20	chr18_61536574.0_61536593.0	395.388	394.856	331.288	192.808	347.814	18.3283	0	698.08	0	211.604	217.835	0	87.4862	2.5586	15.4485	1.19613	2.56567	0	0	0	0	0	22.8175	25.1483	0	0	0	0	0	0	0	0	0	0	0	0	0	0	0	0	0	0	0	0	0	0	0	0
CDH20	chr18_61554610.0_61554629.0	715.713	1068.38	671.642	514.797	899.76	642.874	0	569.524	0	758.434	544.909	96.2182	4182.08	396.583	23.4588	260.757	175.428	602.592	43.5244	69.9342	5.5175	6.33235	322.016	2.6318	1.67507	2065	0	0	0	0	0	0	0	0	0	0	0	0	0	0	0	0	0	0	0	0	0	0
CDK12	chr17_39462331.0_39462350.0	130.923	27.2314	244.107	320.061	133.168	64.6678	0	101.983	0	12.2508	55.262	0	22.6155	2.5586	0	6.37938	23.7324	142.101	0.414518	0	0	0	8.03434	3.80149	0.558357	0	0	0	0	0	0	0	0	0	0	0	0	0	0	0	0	0	0	0	0	0	0	0
CDK12	chr17_39462539.0_39462558.0	42.7682	50.832	244.107	134.002	144.557	120.344	0	0	0	26.729	52.0491	0	238.653	7.16409	0	0	0.320709	0	0	0	0	6.33235	2.89236	0	0	0	0	0	0	0	0	0	0	0	0	0	0	0	0	0	0	0	0	0	0	0	0	0
CDK12	chr17_39462879.0_39462898.0	588.281	246.898	775.561	847.391	509.017	1486.32	0	1092.37	0	424.322	149.722	0	156.523	3.07032	2.86082	897.499	3.5278	430.22	2.48711	41.9605	1.83917	12.6647	77.1297	21.3468	10.6088	35.4675	0	0	0	0	0	0	0	0	0	0	0	0	0	0	0	0	0	0	0	0	0	0
CDK12	chr17_39471204.0_39471223.0	407.607	596.368	946.436	762.556	416.15	824.773	4.25687	672.943	0	756.207	316.793	0	1705.68	43.4962	5.72165	102.868	1339.6	1.06843	0.829035	0	3.67833	25.3294	44.9923	1046.29	2.23343	14.7781	0	0	0	0	0	0	0	0	0	0	0	0	0	0	0	0	0	0	0	0	0	0
CDK12	chr17_39494550.0_39494569.0	115.212	262.329	407.309	471.416	362.708	135.906	0	99.1101	0	172.624	120.805	0	100.579	8.18753	0.572165	32.2956	1.92425	423.097	0	13.9868	0	12.6647	69.7381	0.584845	0	0.985209	0	0	0	0	0	0	0	0	0	0	0	0	0	0	0	0	0	0	0	0	0	0
CDK12	chr17_39501283.0_39501302.0	259.228	332.223	408.007	567.82	311.894	340.63	0	211.148	0	130.304	57.1898	0	82.1299	3181.37	6.29381	33.093	2.24496	0.356142	0.414518	13.9868	0	0	4.8206	77.1995	1.11671	39.4084	4.73442	9.21773	0	4.33187	11281.4	10.932	0	4.52694	0	6.07657	0	0	0	0	0	0	0	0	0	0	0	0
CDKN2A	chr9_21970916.0_21970935.0	2663.85	3141.6	2155.81	2481.44	2864.87	2602.27	21.2843	1924.03	0	1631.58	5303.87	0	1115.9	2326.28	379.917	3917.74	3015.62	590.84	7.46132	251.763	20.2308	94.9853	520.947	1831.44	1725.32	4912.25	0	4.60887	0	0	4.75406	0	0	0	0	12.1531	0	0	0	0	0	0	0	0	0	0	0	0
CDKN2A	chr9_21970971.0_21970990.0	1565.84	2168.53	1569.26	1225.29	2442.58	2994.08	21.2843	1079.44	0	1059.13	1465.73	0	3289.36	6370.92	22.3144	28561.7	4377.67	2869.79	49279.5	1580.51	104.832	626.903	2523.75	203.526	9756.74	81.7724	0	0	0	0	0	0	0	0	0	0	0	0	0	0	0	0	0	0	0	0	0	0
CDKN2A	chr9_21971115.0_21971134.0	1242.02	1182.75	1250.52	1329.41	1103.89	419.822	4.25687	1153.41	0	1748.52	2162.29	0	682.63	196.501	2.86082	109.646	52.5962	23.1492	0	27.9737	0.919583	12.6647	44.6709	112.583	2.79179	11.8225	0	0	0	0	0	0	0	0	0	0	0	0	0	0	0	0	0	0	0	0	0	0
CDKN2A	chr9_21971183.0_21971202.0	3879.69	3333.13	2416.66	2290.56	2849.1	1099.7	17.0275	4094.39	0	1884.39	2815.15	0	7413.12	4417.17	5058.51	1492.38	699.786	10842.7	81.66	307.71	17.4721	145.644	698.345	139.485	1940.29	4644.28	0	0	0	0	0	0	0	0	0	0	0	0	0	0	0	5.12479	2.7833	4.8172	6611.34	0	0	0
CDKN2A	chr9_21974689.0_21974708.0	1708.98	2091.37	979.216	889.809	1143.32	385.586	12.7706	1216.61	0	399.821	1441.31	673.528	943.899	516.838	2.86082	472.872	177.352	69.4477	125.599	153.855	3.67833	56.9912	2393.27	1684.35	2.23343	74.8759	0	0	0	0	0	0	0	0	0	0	0	0	0	0	0	0	0	0	0	0	0	0
CDKN2A	chr9_21974775.0_21974794.0	1730.8	1407.86	1521.13	1692.85	1061.84	1380.85	8.51374	976.019	0	2794.29	1076.97	0	754.643	72.1526	542.984	520.318	256.888	935.585	3.31614	125.882	4.59791	50.6588	475.633	234.523	2584.64	724.129	0	0	0	0	0	0	0	0	0	0	0	0	0	0	0	0	0	0	0	0	0	0
CDO1	chr5_115806425.0_115806444.0	444.266	809.681	283.164	226.549	259.327	175.329	0	45.9641	0	66.8224	59.7601	0	95.2231	81.8753	0	35.4853	1050.64	0.356142	0	0	1.83917	6.33235	26.674	15.7908	0	0	0	0	0	0	0	0	0	0	0	0	0	0	0	0	0	0	0	0	0	0	0	0
CDO1	chr5_115806441.0_115806460.0	465.213	698.032	437.3	229.442	524.787	283.57	17.0275	917.127	0	1201.69	879.052	0	418.982	0	6.29381	16.7459	64.4624	0.356142	0	13.9868	0	12.6647	76.8083	15.4984	0.558357	0	0	0	0	0	0	0	0	0	0	0	0	0	0	0	0	0	0	0	0	0	0	0
CDO1	chr5_115811188.0_115811207.0	584.79	791.526	706.514	495.517	865.592	136.252	0	513.505	0	468.87	233.9	0	1151.01	97.2269	2.28866	120.411	657.774	534.925	0.829035	69.9342	3.67833	18.9971	229.461	8.48025	0.558357	1468.95	0	0	0	0	0	0	0	0	0	0	0	0	0	0	0	0	0	0	0	0	0	0
CDO1	chr5_115813241.0_115813260.0	683.418	656.277	431.72	329.702	468.716	72.6216	4.25687	322.467	0	341.908	548.122	0	246.985	1.53516	1.14433	41.466	1043.27	1.06843	0.829035	13.9868	0.919583	0	462.457	6.72572	0	0	0	0	0	0	0	0	0	0	0	0	0	0	0	0	0	0	0	0	0	0	0	0
CDO1	chr5_115816258.0_115816277.0	1342.4	808.773	1168.92	979.465	1364.97	598.955	4.25687	1199.38	0	442.141	856.561	0	382.678	1194.87	198.541	398.313	212.309	0	48.4986	41.9605	2.75875	12.6647	218.855	17.5453	2.23343	1.97042	0	0	0	0	0	0	0	0	0	0	0	0	0	0	0	0	0	0	0	0	0	0
CDO1	chr5_115816344.0_115816363.0	341.273	421.179	686.288	642.051	598.38	706.85	0	980.328	0	549.057	401.613	0	397.556	103.879	13.1598	145.131	448.671	1.06843	0.829035	13.9868	0.919583	18.9971	274.774	154.399	0.558357	0.985209	0	0	0	0	0	0	0	0	0	0	0	0	0	0	0	0	0	0	0	0	0	0
CES1	chr16_55810518.0_55810537.0	375.313	602.722	817.408	883.061	569.469	373.482	8.51374	527.869	0	540.148	521.776	0	123.79	929.796	11.4433	108.45	34.9572	3.91756	5.38873	167.842	13.7937	94.9853	9864.88	16.3757	11.7255	57.1422	0	0	0	0	0	0	0	0	0	0	0	0	0	0	0	0	0	0	0	0	0	0
CES1	chr16_55810983.0_55811002.0	497.508	707.109	502.162	418.393	397.752	109.624	8.51374	2311.13	0	431.004	766.6	0	74.393	6.14065	474.897	35.0866	8.01772	59.4757	0.414518	13.9868	0	0	19.2824	1.46211	0	18.719	0	0	0	0	0	0	0	0	0	0	0	0	0	0	0	0	0	0	0	0	0	0
CES1	chr16_55821389.0_55821408.0	441.647	744.325	488.213	402.969	359.203	119.653	4.25687	454.614	0	593.606	939.454	0	136.288	13.8165	98.9845	27.1124	27.5809	3.56142	2.07259	181.829	8.27625	75.9882	90.6274	4805.09	3504.25	66.9942	0	0	0	0	0	0	0	0	0	0	0	0	0	0	0	0	0	0	0	0	0	0
CES1	chr16_55823659.0_55823678.0	738.406	547.351	433.812	402.005	447.69	87.4917	4.25687	438.095	0	187.103	553.263	0	97.0085	52.1955	3.43299	18.7394	65.4246	0	0.414518	0	0	6.33235	267.061	9.64994	1.11671	0.985209	0	0	0	0	0	0	0	0	0	0	0	0	0	0	0	0	0	0	0	0	0	0
CES1	chr16_55823663.0_55823682.0	293.268	162.481	561.445	642.051	115.646	442.991	0	167.338	0	76.8457	240.326	0	124.385	162.727	16.5928	86.9191	4.81063	0	0	0	0.919583	12.6647	14.4618	22.5165	0	0	0	0	0	0	0	0	0	0	0	0	0	0	0	0	0	0	0	0	0	0	0	0
CES1	chr16_55828753.0_55828772.0	392.769	314.069	548.891	781.837	692.123	768.751	0	264.294	0	316.293	621.376	0	386.844	73.176	242.598	2684.52	1277.06	7.83513	1.65807	83.921	7.35666	31.6618	23.7816	761.176	3.35014	35.4675	0	0	0	0	0	0	0	0	0	0	0	0	0	0	0	0	0	0	0	0	0	0
CFD	chr19_860625.0_860644.0	380.55	334.946	407.309	325.846	393.371	90.604	200.073	626.979	0	106.916	89.9614	0	82.1299	15.8633	0	50.2376	44.5785	0	0	0	0	0	54.3121	3.50907	0	0.985209	0	0	0	0	0	0	0	0	0	0	0	0	0	0	0	0	0	0	0	0	0	0
CFD	chr19_860679.0_860698.0	1341.53	1386.08	951.318	802.081	1248.45	1389.49	4.25687	1057.17	0	1975.72	807.725	0	517.775	1207.66	133.887	4485.1	569.579	84.0495	6.63228	83.921	3.67833	63.3235	68.1312	384.535	5.02522	64.0386	0	0	0	0	0	0	0	0	0	0	0	0	0	0	0	0	0	0	0	0	0	0
CFD	chr19_860918.0_860937.0	651.124	701.663	786.721	784.729	819.159	379.707	8.51374	1364.56	0	500.054	569.327	0	1005.79	341.829	16695.8	195.767	445.785	3.56142	38.1356	139.868	5.5175	18699.4	993.687	1506.56	2773.36	3613.75	0	0	0	0	0	0	0	0	0	0	1323.6	0	0	1.33922	0.934958	0	0	4.8172	2.61318	0	0	0
CFD	chr19_861770.0_861789.0	352.619	219.667	474.264	567.82	381.106	93.3706	0	272.912	0	366.409	168.999	0	166.64	616.112	1.14433	30.3021	191.784	243.957	111.92	0	0.919583	6.33235	32.4587	2.6318	15.634	1.97042	0	0	0	0	0	0	0	0	0	0	0	0	0	0	0	0	0	0	0	0	0	0
CFD	chr19_861797.0_861816.0	1303.12	1402.42	1063.61	991.997	1137.18	1068.23	12.7706	2323.34	0	980.062	1122.59	0	594.549	1737.29	10.299	1131.14	6894.92	90.8162	4.14518	153.855	9.19583	37.9941	158.437	264.35	4.46686	45.3196	0	0	0	0	0	0	0	0	0	0	0	0	0	0	0	0	0	0	0	0	0	0
CFD	chr19_861873.0_861892.0	830.052	873.221	1161.95	1006.46	1354.46	991.111	12.7706	1731.55	0	425.436	693.346	0	634.424	326.478	6.86598	552.215	3108.63	5.34213	8156.46	321.697	16.5525	88.6529	427.748	820.83	9.49208	43.3492	0	0	0	0	0	0	0	0	0	0	0	0	0	0	0	0	0	0	0	0	0	0
CHD4	chr12_6570933.0_6570952.0	171.946	154.311	372.437	391.4	154.195	351.696	4.25687	564.496	0	132.531	471.012	0	151.167	247.161	0.572165	69.7745	2747.19	0.712284	22.7985	0	4.59791	18.9971	7.07022	12.2817	1.67507	3.94084	0	0	0	0	0	0	0	0	0	0	0	0	0	0	0	0	0	0	0	0	0	0
CHD4	chr12_6577833.0_6577852.0	229.552	168.835	374.529	447.315	205.009	210.257	0	134.301	0	1052.45	557.761	0	735.003	24.0509	0.572165	70.1732	26.6188	0	0.414518	0	0.919583	0	406.859	2.04696	0.558357	1.97042	0	0	0	0	0	0	0	0	0	0	0	0	0	0	0	0	0	0	0	0	0	0
CHD4	chr12_6591558.0_6591577.0	301.123	152.496	582.369	647.835	498.504	284.262	12.7706	168.774	0	360.841	355.99	0	109.507	7.67581	80.1031	57.0157	404.093	242.177	0.829035	0	0.919583	0	140.762	154.691	0.558357	5.91126	0	0	0	0	0	0	0	0	0	0	0	0	0	0	0	0	0	0	0	0	0	0
CHD4	chr12_6592689.0_6592708.0	564.715	462.026	481.239	483.948	183.106	84.7251	0	206.12	0	750.638	134.942	0	246.39	25.0743	0.572165	23.524	95.5712	0	0	0	0	0	52.7053	0	0	0	0	0	0	0	0	0	0	0	0	0	0	0	0	0	0	0	0	0	0	0	0	0
CHD4	chr12_6593509.0_6593528.0	219.078	140.696	610.266	501.301	304.885	962.408	0	194.629	0	212.718	204.984	0	106.531	380.208	2.28866	80.141	61.2554	1.06843	0.414518	0	0	0	59.7755	0	0	2.95563	0	0	0	0	0	0	0	0	0	0	0	0	0	0	0	0	0	0	0	0	0	0
CHD4	chr12_6599762.0_6599781.0	44.5138	122.541	368.95	457.919	258.451	836.531	4.25687	30.8821	0	0	38.5549	0	11.9029	97.7386	0	13.9549	0.962126	257.491	0.829035	13.9868	1.83917	31.6618	52.0625	1069.97	0	39.4084	0	0	0	0	0	0	0	0	0	0	0	0	0	0	0	0	0	0	0	0	0	0
CHL1	chr3_328241.0_328260.0	690.401	344.024	583.066	439.602	449.442	217.173	4.25687	682.279	0	69.0498	198.558	0	366.609	25.586	0	281.092	319.426	0.356142	0	27.9737	2.75875	18.9971	474.026	0.877267	1.67507	1.97042	0	0	0	0	0	0	0	0	0	0	0	0	0	0	0	0	0	0	0	0	0	0
CHL1	chr3_340819.0_340838.0	508.854	290.468	395.453	176.419	396	171.871	4.25687	87.619	0	815.233	490.932	0	114.863	187.29	1.71649	917.036	7.3763	0	1.65807	0	1.83917	0	65.8816	61.1163	1.11671	3.94084	0	0	0	0	0	0	0	0	0	0	0	0	0	0	0	0	0	0	0	0	0	0
CHL1	chr3_341961.0_341980.0	623.194	717.094	506.347	420.321	629.92	138.327	4.25687	819.454	0	207.149	658.646	0	179.734	378.673	14.3041	57.4144	43.9371	0	0	13.9868	0	0	164.865	5.84845	0	26.6007	0	0	0	0	0	0	0	0	0	0	0	0	0	0	0	0	0	0	0	0	0	0
CHL1	chr3_354762.0_354781.0	260.973	372.163	372.437	264.147	289.991	229.622	0	239.157	0	63.4813	409.324	0	95.2231	449.291	3.43299	99.2791	57.4069	0	0	0	0.919583	6.33235	397.539	0.584845	0.558357	13.7929	0	0	0	0	0	0	0	0	0	0	0	0	0	0	0	0	0	0	0	0	0	0
CHL1	chr3_361727.0_361746.0	21.8205	92.5868	207.839	187.988	144.557	18.3283	0	567.369	0	14.4782	14.1368	0	149.976	28.6563	1.71649	1.99356	22.1289	0.356142	0	0	0	6.33235	55.919	9.94236	0	0	0	0	0	0	0	0	0	0	0	0	0	0	0	0	0	0	0	0	0	0	0	0
CHL1	chr3_391138.0_391157.0	263.592	354.008	305.482	155.21	103.38	41.8438	0	114.91	0	588.037	197.915	0	125.575	4.09376	0	13.9549	28.8638	0.356142	0	0	0	0	25.0671	4.67876	0.558357	0	0	0	0	0	0	0	0	0	0	0	0	0	0	0	0	0	0	0	0	0	0	0
CHRDL1	chrX_110681535.0_110681554.0	366.585	320.423	360.58	390.436	419.655	136.252	0	324.621	0	237.219	68.7562	0	95.8182	14.8399	0	56.2183	7.05559	0.356142	0	0	0	0	0.321374	167.266	2.23343	0.985209	0	0	0	0	0	0	0	0	0	0	0	0	0	0	0	0	0	0	0	0	0	0
CHRDL1	chrX_110688729.0_110688748.0	1149.5	1273.52	446.366	300.781	390.743	164.955	4.25687	351.194	0	407.617	659.289	0	223.179	298.333	2.28866	51.8325	9.94197	123.581	0	13.9868	0.919583	6.33235	637.284	48.8345	0.558357	7.88168	0	0	0	0	0	0	0	0	0	0	0	0	0	0	0	0	0	0	0	0	0	0
CHRDL1	chrX_110694185.0_110694204.0	608.356	513.766	318.733	300.781	475.725	155.963	4.25687	519.969	0	116.939	308.439	0	164.26	258.419	71.5206	58.2119	15.394	230.424	0.414518	0	0.919583	6.33235	16.7114	25.4408	0.558357	1.97042	0	0	0	0	0	0	0	0	0	0	0	0	0	0	0	0	0	0	0	0	0	0
CHRDL1	chrX_110721457.0_110721476.0	1019.45	1590.31	1013.39	1054.66	1207.27	1784.76	12.7706	395.004	0	1543.6	744.109	0	416.006	14.8399	10.299	690.568	178.635	1.06843	0	69.9342	4.59791	25.3294	162.936	993.944	2.23343	59.1126	0	0	0	0	0	0	0	0	0	0	0	0	0	0	0	0	0	0	0	0	0	0
CHRDL1	chrX_110762696.0_110762715.0	1496.01	1757.33	916.446	793.405	1103.02	644.603	4.25687	701.671	0	1011.25	635.513	0	397.556	423.705	1.71649	2820.88	225.138	1.78071	0.829035	69.9342	5.5175	63.3235	374.079	457.934	3.9085	2004.9	0	0	0	0	0	0	0	0	0	0	0	0	0	0	0	0	0	0	0	0	0	0
CHRDL1	chrX_110762765.0_110762784.0	637.159	665.354	433.812	598.669	470.469	277.345	0	335.394	0	728.364	161.288	0	174.377	577.732	14.3041	149.118	241.814	52.3529	33.1614	1720.38	47874.4	797.876	467.599	48270.8	13287.8	2689.62	0	0	0	0	0	0	0	0	0	0	0	0	0	0	0	0	0	0	0	0	0	0
CHST9	chr18_26916567.0_26916586.0	528.056	512.858	244.107	313.313	268.964	62.247	0	132.147	0	94.665	319.363	0	72.0125	858.667	1.71649	6.37938	72.1595	1.78071	11.6065	27.9737	0	12.6647	33.4229	905.632	1.67507	78.8168	0	0	0	0	0	0	0	0	0	0	0	0	0	0	0	0	0	0	0	0	0	0
CHST9	chr18_26916938.0_26916957.0	673.817	1638.42	745.571	558.179	1293.13	116.194	12.7706	1832.1	0	676.02	640.011	0	767.736	52.1955	6540.42	72.5655	43.6164	2.84914	178.243	41.9605	4.59791	6.33235	2343.13	8.77267	1630.96	19.7042	0	0	0	0	0	0	0	0	0	0	0	0	0	0	0	0	0	0	0	0	0	0
CHST9	chr18_26917180.0_26917199.0	35.7856	127.08	204.352	124.361	260.203	33.1984	0	104.856	0	154.805	111.809	0	307.69	45.0314	0.572165	71.3693	35.5987	171.304	0	0	1.83917	0	115.052	163.757	1.11671	5.91126	0	0	0	0	0	0	0	0	0	0	0	0	0	0	0	0	0	0	0	0	0	0
CHST9	chr18_27024134.0_27024153.0	619.703	761.572	759.52	734.599	836.681	313.31	4.25687	637.752	0	320.747	1058.97	0	333.281	1567.4	14.8763	319.368	211.347	208.343	0.829035	69.9342	0	18.9971	93.1983	181.887	9.49208	27.5859	0	0	0	0	0	0	0	0	0	0	0	0	0	0	0	0	0	0	0	0	0	0
CHST9	chr18_27142710.0_27142729.0	40.1497	305.9	229.46	218.837	77.9734	66.7427	0	101.983	0	102.461	92.5317	0	67.8464	202.13	0	270.326	0.962126	0.356142	2.07259	69.9342	2.75875	18.9971	24.4244	2.04696	2339.52	1.97042	0	0	0	0	0	0	0	0	0	0	0	0	0	0	0	0	0	0	0	0	0	0
CHST9	chr18_27142761.0_27142780.0	1144.27	728.894	788.813	612.165	910.274	345.125	12.7706	885.527	0	996.767	158.718	0	1199.81	1005.53	6.86598	169.452	915.303	330.856	1.24355	83.921	2.75875	25.3294	191.86	394.185	707.439	1772.39	0	0	0	0	0	0	0	0	0	0	0	0	0	0	0	0	0	0	0	0	0	0
CIDEA	chr18_12262871.0_12262890.0	1378.18	1094.7	873.902	637.231	691.247	940.276	12.7706	908.509	0	409.844	789.09	0	602.286	986.085	2.28866	240.024	107.437	1.42457	1.24355	27.9737	3.67833	12.6647	480.775	67.842	1.67507	2600.95	0	0	0	0	0	0	0	0	0	0	0	0	0	0	0	0	0	0	0	0	0	0
CIDEA	chr18_12262926.0_12262945.0	455.612	339.485	640.257	824.254	258.451	1103.85	4.25687	193.193	0	249.47	701.056	0	454.095	104.903	0.572165	1603.22	627.306	0.712284	2.07259	41.9605	1.83917	31.6618	39.529	4.09391	1.67507	2.95563	0	0	0	0	0	0	0	0	0	0	0	0	0	0	0	0	0	0	0	0	0	0
CIDEA	chr18_12264319.0_12264338.0	370.949	356.732	574.697	575.532	348.69	791.229	2494.52	61.0461	0	649.291	620.734	0	251.746	1496.78	5.14948	350.866	0.962126	0.356142	0.414518	13.9868	5.5175	0	92.5556	27.7801	0.558357	0	2.36721	4.60887	0	0	0	21.8639	8.04269	9.05389	6.38027	36.4594	0	0	0	0	0	0	0	0	0	0	0	0
CIDEA	chr18_12264336.0_12264355.0	986.287	504.689	493.793	458.883	499.38	276.654	4.25687	37.3458	0	589.151	561.616	0	343.993	6.14065	0	108.848	108.72	0	0.414518	0	0.919583	12.6647	34.0656	717.02	17.3091	0	0	0	0	0	0	0	0	0	0	0	0	0	0	0	0	0	0	0	0	0	0	0
CIDEA	chr18_12274153.0_12274172.0	949.629	1240.84	881.573	750.023	724.539	1019.12	4.25687	578.86	0	1378.77	757.604	0	455.285	13.8165	14.3041	167.06	567.975	578.019	0.829035	13.9868	0	44.3265	115.373	164.049	2.23343	338.912	0	0	0	0	0	0	0	0	0	0	2087.14	0	4.528	1.33922	0	0	0	0	2.61318	0	0	0
CIDEA	chr18_12274185.0_12274204.0	768.082	639.031	833.45	708.569	601.884	1113.88	0	598.251	0	816.347	1009.5	0	272.576	180.637	6170.8	929.795	303.39	2.49299	1.65807	41.9605	3.67833	7592.49	78.4152	1432.29	1.67507	806.887	0	0	0	0	0	0	0	0	0	0	0	0	0	0	0	0	0	0	0	0	0	0
CIDEC	chr3_9867201.0_9867220.0	700.002	716.186	607.477	558.179	445.938	867.309	0	170.211	0	337.453	933.671	0	162.474	86.9925	8.58247	253.979	4.16921	0.356142	0.829035	41.9605	1.83917	6.33235	95.448	121.648	1.11671	1.97042	0	0	0	0	0	0	0	0	0	0	0	0	0	0	0	0	0	0	0	0	0	0
CIDEC	chr3_9869992.0_9870011.0	625.812	438.426	676.524	748.095	531.796	981.774	2532.84	677.252	0	431.004	1080.82	0	182.114	23.0274	2.86082	444.563	247.587	1.42457	139.692	6126.23	1.83917	31.6618	198.93	175.161	1.11671	3.94084	0	0	0	0	0	0	0	0	0	0	0	0	0	0	0	0	0	0	0	0	0	0
CIDEC	chr3_9870036.0_9870055.0	350.874	393.948	662.575	641.087	685.991	823.736	0	415.113	0	774.026	496.073	0	82.725	121.789	0	551.817	7.3763	0.356142	0.414518	0	1.83917	6.33235	184.468	11.9893	0.558357	0	0	0	0	0	0	0	0	0	0	0	0	0	0	0	0	0	0	0	0	0	0	0
CIDEC	chr3_9870193.0_9870212.0	250.499	330.408	413.586	358.623	260.203	199.882	0	68.2279	0	374.205	180.565	0	81.5348	39.9142	0.572165	41.8647	7.05559	61.6126	0	13.9868	0.919583	0	38.5648	2.92422	0	0	0	0	0	0	0	0	0	0	0	0	0	0	0	0	0	0	0	0	0	0	0	0
CIDEC	chr3_9877110.0_9877129.0	786.411	850.528	666.76	603.489	452.947	1067.54	12.7706	516.378	0	687.157	1573.68	0	148.786	154.54	236.876	1333.29	974.634	8.54741	8.29035	349.671	17.4721	158.309	364.116	8930.58	4225.65	93.5949	0	0	0	0	0	0	0	0	0	0	0	0	0	0	0	0	0	0	0	0	0	0
CIDEC	chr3_9877196.0_9877215.0	546.386	848.712	1027.34	961.148	1256.34	1438.94	0	468.259	0	652.632	1211.27	0	571.934	369.974	0	2080.48	2602.23	331.924	2.07259	41.9605	5.5175	44.3265	79.7007	80.1237	0.558357	12.8077	0	0	0	0	0	0	0	0	0	0	0	0	0	0	0	0	0	0	0	0	0	0
CKMT2	chr5_81252750.0_81252769.0	823.07	186.081	501.465	597.705	408.265	260.746	0	159.438	0	415.412	104.098	0	478.496	37.3556	0.572165	97.6843	76.9701	0	0	0	0.919583	6.33235	28.6022	9.64994	0	0	0	0	0	0	0	0	0	0	0	0	0	0	0	0	0	0	0	0	0	0	0	0
CKMT2	chr5_81252806.0_81252825.0	233.043	423.902	410.099	508.049	357.451	310.198	0	207.557	0	757.32	616.878	0	143.43	487.67	262.624	61.0028	920.755	0.356142	0.829035	41.9605	0	12.6647	206.643	273.707	0.558357	1.97042	0	0	0	0	0	0	0	0	0	0	0	0	0	0	0	0	0	0	0	0	0	0
CKMT2	chr5_81254420.0_81254439.0	287.158	223.298	165.295	65.5547	249.69	106.166	0	270.757	0	124.735	7.0684	0	92.8425	10.7461	0	325.747	19.8839	0	0.829035	0	0	0	2.57099	216.1	3.35014	32.5119	0	0	0	0	0	0	0	0	0	0	0	0	0	0	0	0	0	0	0	0	0	0
CKMT2	chr5_81255162.0_81255181.0	629.304	591.829	899.01	698.929	834.929	713.074	12.7706	349.04	12753.1	713.886	803.87	0	602.881	312.15	0.572165	430.608	784.774	202.645	2.90162	41.9605	3.67833	31.6618	2291.39	50.0042	3.35014	3.94084	0	0	0	0	0	0	0	0	0	0	0	13.3938	4149.91	0	0	2.56239	0	4.8172	2.61318	0	2.95957	0
CKMT2	chr5_81256945.0_81256964.0	509.727	429.349	497.977	456.955	511.646	287.374	17.0275	295.176	0	557.967	240.326	0	490.994	106.438	2.86082	107.253	316.219	2918.23	10.3629	447.579	27362.2	196.303	120.194	6340.01	787.284	179.308	0	0	0	0	0	0	0	0	0	0	0	0	0	0	0	0	0	0	0	0	0	0
CKMT2	chr5_81257766.0_81257785.0	357.856	495.612	365.462	317.169	247.062	404.606	0	122.81	0	259.494	247.394	0	113.673	151.469	0.572165	204.539	38.8058	695.189	0	69.9342	1.83917	12.6647	472.741	893.935	2.23343	2.95563	0	0	0	0	0	0	0	0	0	0	0	0	0	0	0	0	0	0	0	0	0	0
CLCA4	chr1_86560242.0_86560261.0	366.585	674.431	470.08	530.222	319.779	280.112	0	316.003	0	435.459	876.481	0	720.72	153.516	100.129	155.497	32.0709	344.033	0.414518	13.9868	1.83917	6.33235	31.4946	9.06509	0	0	0	0	0	0	0	0	0	0	0	0	0	0	0	0	0	0	0	0	0	0	0	0
CLCA4	chr1_86565302.0_86565321.0	346.51	259.606	318.036	233.298	153.318	17.2908	0	186.729	0	200.467	207.554	0	83.3202	1.02344	0.572165	3.5884	18.6011	0	56.7889	0	0	0	35.9938	0.877267	0	0	0	0	0	0	0	0	0	0	0	0	0	0	0	0	0	0	0	0	0	0	0	0
CLCA4	chr1_86567564.0_86567583.0	642.396	1009.38	796.485	454.063	806.017	312.964	12.7706	830.945	0	609.197	395.188	0	240.438	3657.27	3.43299	198.957	10.2627	2.84914	16.5807	13.9868	7.35666	12.6647	160.365	2709.59	623.685	6.89647	0	0	0	0	0	0	0	0	0	0	0	0	0	0	0	0	0	0	0	0	0	0
CLCA4	chr1_86571163.0_86571182.0	199.876	258.698	258.056	199.556	330.292	130.373	0	33.0367	0	94.665	111.167	0	68.4416	0	0.572165	37.8776	33.6744	58.4073	0	0	0	12.6647	79.0579	43.8634	0.558357	19.7042	0	0	0	0	0	0	0	0	0	0	0	0	0	0	0	0	0	0	0	0	0	0
CLCA4	chr1_86571188.0_86571207.0	280.175	495.612	103.222	143.642	190.115	20.749	0	333.24	0	73.5046	454.305	0	147.596	32.2384	0	10.3665	3.8485	0	0	0	0	0	60.4182	0	0	0	0	0	0	0	0	0	0	0	0	0	0	0	0	0	0	0	0	0	0	0	0	0
CLCA4	chr1_86572659.0_86572678.0	942.646	719.817	531.455	673.864	732.424	402.185	0	471.132	0	294.018	257.033	0	196.398	2.04688	5.14948	228.462	0.962126	0.356142	47.6695	0	2.75875	6.33235	54.6335	11.6969	0.558357	0.985209	0	0	0	0	0	0	0	0	0	0	0	0	0	0	0	0	0	0	0	0	0	0
CLDN11	chr3_170419145.0_170419164.0	744.516	715.279	720.463	987.177	859.46	429.159	4.25687	685.87	0	417.64	644.509	0	219.013	107.973	0.572165	101.671	421.411	0.356142	0.414518	27.9737	0.919583	0	333.264	2.6318	0	21.6746	0	0	0	0	0	0	0	0	0	0	0	0	0	0	0	0	0	0	0	0	0	0
CLDN11	chr3_170419229.0_170419248.0	713.967	1211.8	613.754	684.468	707.017	1464.19	17.0275	880.5	0	385.342	742.182	0	450.524	548.053	2.28866	856.831	619.609	421.316	6.63228	153.855	19.3112	75.9882	2782.45	459.98	10226.9	61.083	0	0	0	0	0	0	0	0	0	0	0	0	0	0	0	0	0	0	0	0	0	0
CLDN11	chr3_170423181.0_170423200.0	913.843	958.546	634.677	914.874	609.769	326.451	0	280.812	0	422.095	1152.15	0	3746.43	14.3282	53.2113	73.7616	325.519	330.856	3026.39	13.9868	3.67833	6.33235	65.8816	33.6286	3.35014	0.985209	0	0	0	0	0	0	0	0	0	0	0	0	0	0	0	0	0	0	0	0	0	0
CLDN11	chr3_170423186.0_170423205.0	779.429	1770.04	714.186	795.333	1142.44	687.83	4.25687	868.29	0	730.591	1267.81	0	529.083	198.548	22.3144	371.599	1058.34	0.712284	0.829035	41.9605	2.75875	18.9971	23.7816	379.857	0.558357	1.97042	0	0	0	0	0	0	0	0	0	0	0	0	0	0	0	0	0	0	0	0	0	0
CLDN11	chr3_170423218.0_170423237.0	403.243	406.656	410.797	368.263	194.495	713.074	4.25687	289.43	0	219.4	227.474	0	83.3202	0.511721	2.86082	79.7423	10.5834	0	0.414518	13.9868	0.919583	18.9971	2.89236	0.292422	0	0.985209	0	0	0	0	0	0	0	0	0	0	0	0	0	0	0	0	0	0	0	0	0	0
CLDN11	chr3_170432544.0_170432563.0	423.318	251.437	542.614	711.462	947.946	364.837	0	906.354	0	80.1869	457.518	0	111.292	55.2658	4700.91	185.002	52.2755	3.56142	4.14518	167.842	9576.54	16812.4	234.281	26.9029	4.46686	2471.89	0	0	0	0	0	0	0	0	0	0	0	0	0	0	0	0	0	0	0	0	0	0
CLDN19	chr1_42738246.0_42738265.0	478.306	715.279	556.563	571.676	604.513	281.841	4.25687	702.389	0	1202.8	377.195	0	200.564	1343.27	0.572165	379.972	84.6671	0	18.2388	27.9737	0.919583	0	47.5633	413.778	0	0.985209	11.836	0	1.97475	0	0	0	0	0	1573.37	6.07657	0	0	0	0	0	0	0	0	0	0	0	0
CLDN19	chr1_42738287.0_42738306.0	811.723	1032.07	897.615	974.645	766.592	740.394	8.51374	1361.69	0	1186.1	439.526	0	640.375	705.663	6.86598	92.501	694.976	148.511	109.018	9818.76	4.59791	12.6647	214.999	70.4738	1.67507	777.33	4.73442	0	0	4.33187	0	8335.63	5.3618	0	1.27605	0	0.900405	40.1814	2.264	1.33922	677.844	0	2.7833	17799.5	2.61318	0	0	0
CLDN19	chr1_42738493.0_42738512.0	1067.46	1073.83	873.204	762.556	654.451	1133.24	0	1169.21	0	1074.73	1431.03	0	610.023	32.2384	489.773	322.558	1404.7	1.78071	0.829035	55.9473	5.5175	25.3294	55.919	42.4013	2816.91	2.95563	0	0	0	0	0	0	0	0	0	0	0	0	0	0	0	0	0	0	0	0	0	0
CLDN19	chr1_42738567.0_42738586.0	148.379	0	175.059	191.844	215.522	155.963	0	63.9188	0	25.6152	9.63872	0	23.8058	19.4454	4.00515	57.8132	0.641417	0	0	0	0	0	8.03434	0	0	5.91126	0	0	0	0	0	0	0	0	0	0	0	0	0	0	0	0	0	0	0	0	0	0
CLDN19	chr1_42738568.0_42738587.0	240.898	246.898	315.944	329.702	289.115	219.94	0	286.557	0	109.143	272.455	0	152.357	0.511721	0.572165	72.1668	133.094	16.0264	8.70487	447.579	21.1504	183.638	17.9969	15160.6	6264.77	245.317	0	0	0	0	0	0	0	0	0	0	0	0	0	0	0	0	0	0	0	0	0	0
CLDN19	chr1_42739956.0_42739975.0	828.307	412.102	713.489	701.821	786.743	521.838	12.7706	496.269	0	374.205	599.529	0	198.778	106.95	201.402	627.97	102.947	1590.53	2.90162	55.9473	6.43708	69.6559	3402.7	226.627	4.46686	99.5062	0	4.60887	2616.55	4.33187	9.50812	0	5.3618	4.52694	1.27605	6.07657	0	0	0	0	0	0	0	0	0	0	0	0
CLDN5	chr22_19523646.0_19523665.0	642.396	402.117	525.178	308.493	482.734	563.336	0	131.429	0	367.523	260.246	0	388.629	0.511721	3.43299	211.716	633.4	241.82	0.829035	13.9868	4.59791	44.3265	1156.3	231.014	1.11671	5.91126	0	0	0	0	0	0	0	0	0	0	0	0	0	0	0	0	0	0	0	0	0	0
CLDN5	chr22_19524029.0_19524048.0	313.343	667.17	372.437	352.839	678.106	178.442	12.7706	810.117	0	275.085	644.509	0	207.705	119.743	146.474	105.26	17.639	0	0	27.9737	0	0	18.6397	78.3692	0.558357	0	0	0	0	0	0	0	0	0	0	0	0	0	2241.36	0	0.934958	0	5.56661	0	0	0	0	1.83908
CLDN5	chr22_19524050.0_19524069.0	484.415	560.967	523.783	448.279	435.424	846.906	8.51374	634.161	0	496.713	52.0491	0	299.358	4.09376	1.14433	613.617	570.861	0	107.36	69.9342	3.67833	18.9971	127.585	3.80149	1.67507	1.97042	0	0	0	0	0	0	0	0	0	0	0	0	0	0	0	0	0	0	0	0	0	0
CLDN5	chr22_19524131.0_19524150.0	438.156	637.215	663.97	675.792	505.513	1039.87	0	963.091	0	360.841	135.585	0	457.071	1.02344	6.86598	570.955	256.246	246.45	2594.47	55.9473	4.59791	63.3235	120.515	535.425	8.93372	3.94084	0	0	0	0	0	0	0	0	0	0	0	0	0	0	0	0	0	0	0	0	0	0
CLDN5	chr22_19524380.0_19524399.0	870.202	1054.76	880.179	893.665	701.761	793.65	0	215.457	0	671.565	1052.55	0	560.031	167.333	25.1753	290.262	73.4423	0	0	13.9868	0.919583	0	66.5243	150.013	0.558357	0.985209	0	0	0	0	0	0	0	0	0	0	0	0	0	0	0	0	0	0	0	0	0	0
CLDN5	chr22_19524431.0_19524450.0	610.101	1063.84	535.64	556.251	771.849	114.811	0	648.525	0	469.984	321.291	0	449.334	74.1995	9.15464	44.6557	54.1998	0.356142	0	0	0	0	54.9549	32.7513	0.558357	0	0	0	0	0	0	0	0	0	0	0	0	0	0	0	0	0	0	0	0	0	0	0
CLEC3B	chr3_45030858.0_45030877.0	502.745	558.244	675.827	659.403	1027.67	405.643	0	285.121	0	165.942	156.79	0	281.503	308.567	159.634	358.84	1813.29	1.06843	1.65807	55.9473	2.75875	0	97.3762	339.502	0.558357	0.985209	2.36721	0	0	0	0	0	0	0	0	6.07657	0	0	0	0	0	0	0	0	0	0	0	0
CLEC3B	chr3_45035541.0_45035560.0	734.042	659	749.756	717.246	566.84	578.552	0	417.268	0	672.679	2436.03	0	299.953	211.341	0.572165	384.358	455.727	1640.75	3.73066	209.803	12.8742	44.3265	191.217	1510.07	5182.67	2710.31	0	0	0	0	0	0	0	0	0	0	0	0	0	0	0	0	0	0	0	0	0	0
CLEC3B	chr3_45035601.0_45035620.0	549.877	777.003	498.675	550.467	521.283	207.49	4.25687	545.824	0	837.507	582.179	0	259.483	0.511721	24.0309	114.829	129.246	118.595	0.414518	27.9737	2.75875	18.9971	873.815	701.521	0.558357	0.985209	0	0	0	0	0	0	0	0	0	0	0	0	0	0	0	0	0	0	0	0	0	0
CLEC3B	chr3_45035664.0_45035683.0	860.601	641.754	623.518	721.102	668.469	837.569	8.51374	486.932	0	712.772	970.298	0	1894.94	1537.72	64.6546	290.262	371.06	1076.62	4.14518	195.816	11039.6	37.9941	352.868	7.60298	7.25865	4.92605	4.73442	0	0	11306.2	4.75406	0	5.3618	4.52694	1.27605	6.07657	0	0	0	0	0	0	0	0	0	0	0	0
CLEC3B	chr3_45035670.0_45035689.0	693.019	608.168	1098.48	1273.5	835.805	1168.52	8.51374	507.041	0	978.948	564.187	0	772.497	56.2893	40.6237	134.764	600.046	2.13685	29.0162	97.9078	2.75875	25.3294	504.878	472.847	2.23343	10.8373	0	0	0	0	0	0	0	0	0	0	0	0	0	0	0	0	0	0	0	0	0	0
CLEC3B	chr3_45035856.0_45035875.0	733.169	1152.8	662.575	676.756	960.212	1222.81	8.51374	447.432	0	874.26	1125.8	0	348.755	743.018	950.366	318.57	1033.32	2.13685	2.07259	55.9473	8.27625	1817.38	271.561	231.306	4.46686	3900.44	0	0	0	0	0	0	0	0	0	0	0	0	0	0	0	0	0	0	0	0	0	0
CLEC4G	chr19_7729437.0_7729456.0	1050	1323.45	1348.17	1044.06	1591.88	3532.52	4.25687	688.025	0	1288.56	548.765	0	702.27	91.598	6.86598	1749.15	25578.8	5.34213	12.021	391.631	14.7133	158.309	274.453	409.976	18.9842	22.6598	0	0	0	0	0	0	0	0	0	0	0	0	0	0	0	0	0	0	0	0	0	0
CLEC4G	chr19_7730090.0_7730109.0	597.882	1116.49	824.383	682.54	1209.03	998.373	12.7706	851.772	0	1065.82	1148.94	0	358.872	6.65237	29.1804	568.562	1275.78	2.13685	375.968	41.9605	3.67833	37.9941	723.091	215.515	2.23343	5.91126	0	0	0	0	0	0	0	0	0	0	0	0	0	0	0	0	0	0	0	0	0	0
CLEC4G	chr19_7730100.0_7730119.0	341.273	482.904	359.883	283.428	304.885	127.261	0	265.012	0	272.858	245.466	0	292.216	1.53516	333.572	72.1668	41.0507	97.9391	0.414518	27.9737	0	25.3294	582.008	25.7332	1.11671	698.514	0	0	0	0	0	0	0	0	0	0	0	0	0	0	0	0	0	0	0	0	0	0
CLEC4G	chr19_7730128.0_7730147.0	1485.54	1186.38	1505.09	1566.57	1489.38	2904.52	4.25687	1393.29	0	601.401	1215.76	0	1364.07	232.321	470.892	1676.58	1476.54	5.34213	4.97421	69.9342	13.7937	88.6529	528.017	256.454	5831.49	12.8077	0	0	0	0	0	0	0	0	0	0	0	0	0	0	0	0	0	0	0	0	0	0
CLEC4G	chr19_7730854.0_7730873.0	626.685	684.416	575.394	520.582	449.442	210.257	17.0275	368.431	0	325.202	510.852	0	295.192	600.76	1.14433	125.195	38.485	0.356142	652.451	27.9737	1.83917	0	110.231	92.6979	0	0.985209	0	0	0	0	0	0	0	0	0	0	0	0	0	0	0	0	0	0	0	0	0	0
CLEC4G	chr19_7731683.0_7731702.0	1139.03	1435.1	1116.61	1539.57	1052.2	731.403	12.7706	673.661	0	896.534	541.054	0	635.019	454.92	12223.7	1035.85	360.477	5.69827	41.0372	139.868	9.19583	56.9912	1567.66	387.167	5706.97	1062.06	0	0	0	0	0	0	0	0	0	0	0	0	0	0	0	0	0	0	0	0	0	0
CLIP1	chr12_122334083.0_122334102.0	226.06	295.915	365.462	306.565	233.92	71.2383	0	380.64	0	150.35	34.6994	0	114.863	45.0314	41.1959	9.56907	18.9218	0	0	13.9868	0	0	29.5664	13.159	0	0	0	0	0	0	0	0	0	0	0	0	0	0	0	0	0	0	0	0	0	0	0	0
CLIP1	chr12_122334649.0_122334668.0	689.528	267.776	760.915	833.895	957.583	490.714	0	272.912	0	366.409	215.265	0	459.451	23.0274	0.572165	466.492	204.291	68.7354	0.829035	41.9605	0	31.6618	394.968	41.8164	0.558357	0	0	0	0	0	0	0	0	0	0	0	0	0	0	0	0	0	0	0	0	0	0	0
CLIP1	chr12_122340934.0_122340953.0	216.459	147.957	210.629	170.635	205.885	135.906	0	211.866	0	73.5046	450.45	0	199.373	78.2932	298.098	261.156	18.9218	0	0	13.9868	0.919583	0	3.53511	13.4514	0.558357	0	0	0	0	0	0	0	0	0	0	0	0	0	0	0	0	0	0	0	0	0	0	0
CLIP1	chr12_122341585.0_122341604.0	384.041	466.565	567.722	686.397	358.327	226.164	4.25687	759.844	0	337.453	331.572	0	148.786	3.58204	3.43299	195.767	6.73488	100.788	0	13.9868	0.919583	0	73.2732	48.2497	0	1.97042	0	0	0	0	0	0	0	0	0	0	0	0	0	0	0	0	0	0	0	0	0	0
CLIP1	chr12_122355277.0_122355296.0	1262.97	1489.56	832.752	588.064	1137.18	1177.16	4.25687	486.214	0	814.119	1461.87	0	1123.04	1076.66	9.7268	1045.82	725.122	328.719	1.65807	69.9342	4.59791	75.9882	330.372	2716.6	4.46686	21.6746	0	0	0	0	0	0	0	0	0	0	0	0	0	0	0	0	0	0	0	0	0	0
CLIP1	chr12_122361075.0_122361094.0	1082.3	599.999	986.888	812.686	1137.18	1500.85	4.25687	506.323	0	265.062	350.85	0	1062.33	837.686	1.71649	1082.9	352.78	1.06843	0.414518	41.9605	1.83917	44.3265	18.6397	12.5742	1.11671	17.7338	0	0	0	0	0	0	0	0	0	0	0	0	0	0	0	0	0	0	0	0	0	0
CMA1	chr14_24505600.0_24505619.0	686.037	715.279	711.396	1045.98	770.097	1417.5	0	466.105	0	653.746	648.365	0	204.134	233.856	15.4485	551.418	953.146	1.42457	24.8711	41.9605	3.67833	12.6647	306.269	28.365	1.11671	2.95563	0	0	0	0	0	0	0	0	0	0	0	0	0	0	0	0	0	0	0	0	0	0
CMA1	chr14_24506191.0_24506210.0	356.111	451.134	272.004	292.104	223.407	69.1634	0	101.265	0	170.397	352.777	0	228.535	0	19.4536	9.17036	15.0733	1.06843	0.414518	27.9737	0	6.33235	71.3449	123.402	0.558357	541.865	0	0	0	0	0	0	0	0	0	0	0	0	0	0	0	0	0	0	0	0	0	0
CMA1	chr14_24506207.0_24506226.0	1001.13	1772.77	1157.76	991.997	1270.35	863.159	4.25687	990.382	0	1079.18	739.611	0	567.768	2143.09	3.43299	1088.88	597.16	6.41056	2.90162	181.829	10.1154	56.9912	295.664	69.889	4131.29	9966.38	0	0	0	0	0	0	0	0	0	0	0	0	0	0	0	0	0	0	0	0	0	0
CMA1	chr14_24506468.0_24506487.0	470.45	684.416	687.683	789.549	756.079	825.119	8.51374	1121.09	0	827.484	681.136	0	254.127	3125.59	6.29381	685.385	4601.53	3436.06	4.14518	111.895	8.27625	82.3206	29.5664	419.334	5.02522	31.5267	0	0	0	0	0	0	0	0	0	0	0	0	0	0	0	0	0	0	0	0	0	0
CMA1	chr14_24506566.0_24506585.0	320.325	452.042	338.959	317.169	284.734	149.393	0	441.686	0	228.31	181.851	0	247.58	2880.47	6.29381	20.733	29.5052	0	0	0	0	0	0.964121	17.2529	0	0.985209	0	0	0	0	0	0	0	0	0	0	0	0	0	0	0	0	0	0	0	0	0	0
CMA1	chr14_24506586.0_24506605.0	386.659	282.299	428.233	378.868	243.557	287.374	4.25687	257.83	0	188.216	313.58	0	66.061	4.60548	0	64.99	133.415	418.823	2.48711	55.9473	1.83917	25.3294	93.1983	1939.05	1.67507	0.985209	0	0	0	0	0	0	0	0	0	0	0	0	0	0	0	0	0	0	0	0	0	0
CMTM5	chr14_23377269.0_23377288.0	538.53	825.112	760.915	536.006	744.69	558.149	0	871.881	0	883.169	1267.17	0	476.115	286.052	4.57732	118.816	187.935	1942.4	0	13.9868	4.59791	25.3294	70.3808	240.079	3.9085	1.97042	0	0	0	0	0	0	0	0	0	0	1.80081	26.7876	2.264	0	2.80487	2.56239	2.7833	9.6344	16450	0	0	0
CMTM5	chr14_23377305.0_23377324.0	458.231	525.566	626.308	834.859	325.035	160.113	0	366.276	0	226.082	445.952	0	162.474	136.629	4.57732	108.848	37.5229	84.7618	2.90162	69.9342	4.59791	18.9971	2685.08	1.46211	1.11671	32.5119	0	0	0	0	0	0	0	0	0	0	0	0	0	0	0	0	0	0	0	0	0	0
CMTM5	chr14_23378406.0_23378425.0	734.915	352.193	469.382	584.208	532.672	2146.83	0	377.767	0	488.917	691.418	0	105.341	181.149	9.7268	714.89	68.311	265.326	0.829035	27.9737	2.75875	0	184.147	9.94236	0.558357	7.88168	0	0	0	0	0	0	0	0	0	0	0	0	0	0	0	0	0	0	0	0	0	0
CMTM5	chr14_23378449.0_23378468.0	326.435	307.715	470.777	507.085	238.301	226.164	4.25687	1814.15	0	134.758	181.851	0	267.815	60.383	179.66	261.953	0	0	0	13.9868	0	0	35.0297	30.9968	0	0	0	0	0	0	0	0	0	0	0	0	0	0	0	0	0	0	0	0	0	0	0	0
CMTM5	chr14_23379051.0_23379070.0	337.782	282.299	520.993	534.078	247.062	471.348	4.25687	83.3099	0	15.5919	73.8969	0	72.6076	86.4808	1.14433	91.3049	0.641417	0	0.829035	0	0	0	67.8098	44.4482	0	0	0	0	0	0	0	0	0	0	0	0	0	0	0	0	0	0	0	0	0	0	0	0
CMTM5	chr14_23379315.0_23379334.0	449.503	446.595	399.637	413.573	559.831	300.169	4.25687	599.688	0	1104.8	628.445	0	308.88	99.7855	10.299	122.404	49.7098	0	0	13.9868	0	6.33235	71.0236	0.877267	0	0	0	0	0	0	0	0	0	0	0	0	0	0	0	0	0	0	0	0	0	0	0	0
CNN1	chr19_11538973.0_11538992.0	182.419	156.127	284.559	447.315	375.849	226.856	0	107.728	0	83.528	111.809	0	277.337	75.7346	1.71649	460.512	401.207	0.712284	0.414518	13.9868	0	0	20.8893	0.584845	0.558357	0.985209	0	0	0	0	0	0	0	0	0	0	0	0	0	0	0	0	0	0	0	0	0	0
CNN1	chr19_11541130.0_11541149.0	336.036	393.04	673.734	844.499	240.929	434.692	0	321.749	0	113.598	638.083	0	114.268	856.108	2.28866	70.9706	970.465	0	0.829035	41.9605	0.919583	6.33235	75.2014	47.3724	0	0	0	0	0	0	0	0	0	0	0	0	0	0	0	0	0	0	0	0	0	0	0	0
CNN1	chr19_11546720.0_11546739.0	645.014	908.622	763.705	613.13	741.185	856.243	12.7706	313.13	29.0668	406.503	2970.65	0	930.21	482.552	4.00515	337.709	21110.3	134.978	32.7469	195.816	17.4721	145.644	185.433	2143.16	13.4006	30.5415	0	0	0	8.66373	4.75406	5.46598	5.3618	0	2.55211	12.1531	0	0	0	0	0	0	0	0	0	0	0	0
CNN1	chr19_11546915.0_11546934.0	162.345	144.327	177.849	276.68	106.009	216.136	0	81.8735	0	193.785	117.592	0	5.95144	0	0	401.104	210.064	0	0	13.9868	0	6.33235	2.89236	0.292422	0	7.88168	0	0	0	0	0	0	0	0	0	0	0	0	0	0	0	0	0	0	0	0	0	0
CNN1	chr19_11547849.0_11547868.0	102.993	600.907	391.965	486.84	440.681	9087.03	0	620.515	0	248.357	686.277	0	188.661	11.2579	3578.89	422.235	20.8461	535.282	7.46132	125.882	10.1154	50.6588	4.49923	665.553	7.25865	34.4823	0	0	0	0	0	0	0	0	0	0	0	0	0	0	0	0	0	0	0	0	0	0
CNN1	chr19_11549575.0_11549594.0	484.415	570.044	534.942	613.13	788.495	308.123	8.51374	167.338	0	491.145	360.488	0	3526.82	5487.69	16.0206	528.691	759.759	1.42457	149.226	97.9078	3.67833	25.3294	369.258	673.156	1476.3	22.6598	0	0	0	0	0	0	0	0	0	0	0	0	0	0	0	0	0	0	0	0	0	0
CNTFR	chr9_34556299.0_34556318.0	836.162	620.876	442.182	368.263	545.814	144.897	4.25687	411.522	0	532.352	559.689	0	242.819	190.36	21.7423	8.77165	121.869	0.712284	0.414518	0	0.919583	12.6647	390.469	28.365	0.558357	6.89647	0	0	0	0	0	0	0	0	0	0	0	0	0	0	0	0	0	0	0	0	0	0
CNTFR	chr9_34557524.0_34557543.0	652.87	96.2177	467.29	441.53	568.592	371.753	4.25687	119.219	0	380.888	151.007	0	152.357	138.676	22.3144	522.312	69.9145	0.356142	0.414518	0	0	0	77.1297	14.3287	0	0	0	0	0	0	0	0	0	0	0	0	0	0	0	0	0	0	0	0	0	0	0	0
CNTFR	chr9_34557569.0_34557588.0	339.527	573.675	588.646	570.712	564.212	842.064	1081.24	1039.22	0	580.241	152.292	0	274.957	13.3047	5.14948	240.822	4874.77	833.016	1.65807	41.9605	5.5175	25.3294	20.8893	190.952	3.35014	7.88168	0	0	0	0	0	0	0	0	0	0	0	0	0	0	0	0	0	0	0	0	0	0
CNTFR	chr9_34557616.0_34557635.0	591.772	665.354	591.435	353.803	686.867	637.341	0	215.457	0	408.73	503.784	0	166.64	287.587	4.00515	564.177	276.451	0	1.65807	0	1.83917	12.6647	627.321	241.541	1.11671	9.85209	0	0	0	0	0	0	0	0	0	0	0	0	0	0	0	0	0	0	0	0	0	0
CNTFR	chr9_34564780.0_34564799.0	1229.8	1118.3	1074.77	859.924	1506.03	7419.5	12.7706	1852.21	0	990.085	939.454	0	1482.5	230.786	32.0412	2215.24	254.643	4.98599	2.07259	97.9078	1605.59	113.982	1430.11	65.5026	5.02522	10.8373	4.73442	9.21773	1.97475	4.33187	14.2622	10.932	11005.1	13.5808	3.82816	0	1248.86	13.3938	0	0	0	0	2.7833	0	2.61318	0	0	0
CNTFR	chr9_34568913.0_34568932.0	398.006	467.473	526.573	647.835	322.407	504.547	0	243.466	0	531.238	384.906	0	252.341	25.586	0	133.967	7.3763	184.838	0	27.9737	0	6.33235	85.8067	10.2348	0.558357	0	0	0	0	4.33187	0	0	0	0	0	12.1531	0.900405	0	0	0	0.934958	0	4258.46	0	0	0	0	0
CNTNAP2	chr7_146839843.0_146839862.0	1133.79	904.991	1373.97	1477.87	2523.18	1622.57	4.25687	996.846	0	1858.78	337.355	0	1484.88	357.693	256.33	976.843	724.481	2.13685	1.24355	55.9473	3.67833	37.9941	522.232	590.108	4.46686	5.91126	0	967.862	0	0	0	0	8.04269	0	0	0	0	0	0	0	0	0	0	0	0	0	0	0
CNTNAP2	chr7_147121045.0_147121064.0	1334.54	1017.55	1588.79	1544.39	1415.79	1097.28	17.0275	12094.3	0	956.674	1559.55	0	917.712	2667.09	3.43299	452.936	271.32	419.892	1.65807	69.9342	8.27625	50.6588	340.335	419.626	2844.83	273.888	0	0	0	0	0	0	0	0	0	0	0	0	0	0	0	0	0	0	0	0	0	0
CNTNAP2	chr7_147132295.0_147132314.0	2021.45	1881.69	1752.69	1654.29	1754.84	1308.92	8.51374	1799.06	0	1328.65	1097.53	0	851.056	925.702	9.7268	265.143	543.601	2.84914	3.31614	83.921	4.59791	37.9941	2286.89	19.2999	2.79179	4063.99	0	0	0	0	0	0	0	0	0	0	0	0	0	0	0	0	0	0	0	0	0	0
CNTNAP2	chr7_147562191.0_147562210.0	231.297	687.139	549.589	499.373	546.69	210.603	4.25687	339.703	0	283.995	240.326	0	119.029	34.797	1818.34	714.89	21.8082	1.06843	0.829035	55.9473	2.75875	6.33235	328.444	236.277	0.558357	622.652	0	4.60887	0	0	0	0	0	0	0	0	0	0	0	0	0	0	0	0	0	0	0	0
CNTNAP2	chr7_147903654.0_147903673.0	2841.9	2586.08	2233.92	2284.78	2581.01	5743.67	17.0275	2291.02	0	2367.74	2504.78	0	3444.69	4753.37	221.428	3027.42	2694.27	1364.02	59.6905	951.105	19519.1	379.941	8083.19	21820.9	63.0944	204.924	0	0	0	0	0	0	0	0	0	0	0	0	0	0	0	0	0	0	0	0	0	0
CNTNAP2	chr7_147903686.0_147903705.0	1580.68	990.316	1133.35	1127.93	1251.08	1739.46	0	1021.98	0	897.647	994.716	0	4648.08	19.9571	1309.69	1573.32	31.7502	555.582	2926.49	195.816	8.27625	82.3206	168.4	621.398	2.23343	43.3492	0	0	0	0	0	0	0	0	0	0	0	0	0	0	0	0	0	0	0	0	0	0
CNTNAP3	chr9_39103781.0_39103800.0	236.534	200.605	315.246	442.494	457.327	129.336	0	107.01	0	182.648	469.727	0	340.422	838.198	6.29381	31.4982	0.962126	0	0	13.9868	0	0	199.573	0.584845	0	0.985209	0	0	0	0	0	0	0	0	0	0	0	0	0	0	0	0	0	0	0	0	0	0
CNTNAP3	chr9_39109148.0_39109167.0	240.026	143.419	325.708	340.306	317.15	454.058	0	951.6	0	407.617	165.786	0	125.575	0	1.71649	40.2699	1003.82	0.712284	0	13.9868	1.83917	0	78.7365	5.55603	0.558357	1.97042	0	0	0	0	0	0	0	0	0	0	0	0	0	0	0	0	0	0	0	0	0	0
CNTNAP3	chr9_39133104.0_39133123.0	1049.13	1409.68	935.277	904.27	1204.65	1175.78	12.7706	901.327	0	652.632	1589.75	0	561.221	277.864	1.71649	1440.94	1018.89	6.41056	4.55969	97.9078	16.5525	37.9941	497.808	1179.34	6092.8	16.7486	0	0	1.97475	4.33187	4.75406	0	2.6809	4.52694	0	6.07657	1.80081	40.1814	4.528	1.33922	0.934958	0	2.7833	0	6540.79	0	0	0
CNTNAP3	chr9_39133124.0_39133143.0	775.065	828.743	640.257	597.705	1008.4	846.906	8.51374	3636.19	7.26671	825.256	1141.87	0	993.296	198.548	133.314	1367.58	1354.35	2.13685	57.2034	69.9342	9.19583	139.312	238.138	1299.82	5035.27	18.719	0	0	0	0	0	0	0	0	0	0	0	0	0	0	0	0	0	0	0	0	0	3.67815
CNTNAP3	chr9_39171384.0_39171403.0	1028.18	1604.84	687.683	740.383	1053.95	784.659	29.7981	1113.91	0	1127.07	1204.84	0	2035.99	134.582	2.86082	598.067	946.091	1.06843	0.829035	27.9737	2.75875	18.9971	166.793	160.832	0.558357	3.94084	0	0	0	0	0	0	0	0	0	0	0	0	0	0	0	0	0	0	0	0	0	0
CNTNAP3	chr9_39193171.0_39193190.0	645.014	627.23	564.235	547.575	622.035	337.171	0	186.729	0	108.03	160.645	0	1136.13	354.111	13.732	87.3178	179.918	0	0.414518	13.9868	1.83917	0	269.632	54.9754	0	0.985209	0	0	0	0	0	0	0	0	0	0	0	0	0	0	0	0	0	0	0	0	0	0
COL17A1	chr10_104033354.0_104033373.0	719.204	472.011	718.371	668.08	794.628	583.393	8.51374	625.543	0	1143.78	875.196	0	529.083	276.329	3.43299	1251.56	183.125	129.992	2.07259	27.9737	7.35666	82.3206	3261.3	57.0224	15.0757	1645.3	0	0	0	0	0	0	0	0	0	0	0	0	0	0	0	0	0	0	0	0	0	0
COL17A1	chr10_104043822.0_104043841.0	363.966	309.53	571.209	536.006	455.575	736.936	0	420.141	0	147.009	438.883	0	138.073	214.411	2.86082	204.938	83.0636	1.42457	0	0	1.83917	6.33235	101.233	36.8452	1.11671	0	0	0	0	0	0	0	0	0	0	0	0	0	0	0	0	0	0	0	0	0	0	0
COL17A1	chr10_104053067.0_104053086.0	1466.34	1264.45	1411.63	1587.77	1919.55	2517.55	2911.7	1154.13	0	1556.96	1183.64	0	1386.09	977.386	37.7629	1397.48	713.256	2.49299	17.8243	97.9078	8.27625	56.9912	308.197	264.057	5087.19	17.7338	0	0	0	0	0	0	0	0	0	0	1.80081	38975.9	0	2.67844	1.86992	2.56239	2.7833	4.8172	0	0	0	0
COL17A1	chr10_104063797.0_104063816.0	329.053	311.346	146.464	227.513	231.292	75.7339	17.0275	1182.86	0	71.2772	23.1329	0	208.3	0	0	19.9356	4.16921	0	0	0	0	6.33235	93.8411	2.6318	0	0.985209	0	0	0	0	0	0	0	0	0	0	0	0	0	0	0	0	0	0	0	0	0	0
COL17A1	chr10_104064496.0_104064515.0	305.487	186.081	537.034	522.51	576.477	395.615	4.25687	196.066	0	376.433	134.3	0	430.884	131.512	0	69.7745	53.8791	0.712284	0.414518	0	0	0	279.916	5.55603	0	4.92605	0	0	0	0	0	0	0	0	0	0	0	0	0	0	0	0	0	0	0	0	0	0
COL17A1	chr10_104074178.0_104074197.0	422.445	155.219	190.403	292.104	217.274	56.0223	0	432.35	0	273.972	30.8439	0	40.4698	1.02344	13.732	62.199	15.7147	0	0	0	0	6.33235	10.284	0	0	0	0	0	0	0	0	0	0	0	0	0	0	0	0	0	0	0	0	0	0	0	0	0
COL25A1	chr4_108859714.0_108859733.0	649.378	735.248	308.969	271.859	344.309	86.4542	17.0275	48.8368	0	142.554	470.37	0	412.435	0.511721	13.732	68.5784	4.16921	0.356142	0	13.9868	0.919583	0	0	104.98	2.79179	1.97042	0	0	0	0	0	0	0	0	0	0	0	0	0	0	0	0	0	0	0	0	0	0
COL25A1	chr4_108863310.0_108863329.0	569.952	449.318	574.697	455.991	394.247	375.557	0	262.139	0	405.389	346.351	0	534.44	514.279	3241.89	123.202	154.261	1.06843	1.65807	69.9342	2.75875	15362.3	27.9595	187.443	2761.08	55.1717	0	0	306.086	0	4.75406	0	0	0	0	0	0	0	0	0	0	0	0	0	0	0	0	0
COL25A1	chr4_108863378.0_108863397.0	402.37	263.237	359.185	291.14	425.787	315.731	0	202.529	0	296.246	248.679	0	121.409	29.6798	0.572165	138.353	23.7324	0	4.97421	13.9868	0	6.33235	52.3839	249.144	0.558357	0	0	0	0	0	0	0	0	0	0	0	0	0	0	0	0	0	0	0	0	0	0	0
COL25A1	chr4_108941356.0_108941375.0	385.787	223.298	289.441	312.349	436.301	340.63	0	202.529	0	129.19	64.9007	0	104.745	49.6369	1.14433	61.4016	370.739	0.712284	0.414518	0	0	0	0.321374	5.55603	0	0.985209	0	0	0	0	0	0	0	0	0	0	0	0	0	0	0	0	0	0	0	0	0	0
COL25A1	chr4_109301836.0_109301855.0	354.365	450.226	525.875	509.013	700.008	534.287	4.25687	599.688	0	888.738	530.13	0	182.114	83.9222	1.14433	364.024	779.322	0.712284	0.414518	27.9737	0.919583	25.3294	20.5679	51.1739	2.79179	0	0	0	0	0	0	0	0	0	0	0	0	0	0	0	0	0	0	0	0	0	0	0
COL25A1	chr4_109301904.0_109301923.0	823.942	383.055	753.941	960.184	630.796	1471.11	0	130.71	0	300.701	419.606	0	357.682	368.95	1.14433	1287.44	431.995	1.42457	0.414518	27.9737	4.59791	12.6647	74.2373	61.7011	0.558357	3.94084	0	0	0	0	0	0	0	0	0	0	0	0	0	0	0	0	0	0	0	0	0	0
COL6A3	chr2_237366836.0_237366855.0	802.122	865.051	514.716	610.237	664.088	177.058	4.25687	660.016	0	668.224	655.433	0	157.713	24.5626	0.572165	302.622	142.074	0	0	13.9868	0	6.33235	19.9252	78.3692	0.558357	0	0	0	0	0	0	0	0	0	0	0	0	0	0	0	0	0	0	0	0	0	0	0
COL6A3	chr2_237367089.0_237367108.0	569.079	226.021	596.318	780.873	578.23	105.128	12.7706	1859.39	0	320.747	327.074	0	474.33	117.696	28.0361	32.2956	297.297	0.712284	0.414518	0	0.919583	0	229.782	0.877267	0	4.92605	0	0	0	0	0	0	0	0	0	0	0	0	0	0	0	0	0	0	0	0	0	0
COL6A3	chr2_237371843.0_237371862.0	483.543	947.653	652.113	677.72	795.504	738.665	8.51374	213.302	0	1219.51	825.717	0	411.245	46.5666	4.57732	625.578	1199.45	1.42457	1.24355	27.9737	0.919583	18.9971	79.7007	229.552	2.23343	3.94084	0	0	0	0	0	0	0	0	0	0	0	0	0	0	0	0	0	0	0	0	0	0
COL6A3	chr2_237374936.0_237374955.0	360.475	639.938	469.382	270.895	453.823	51.1809	0	247.057	0	488.917	722.904	0	207.11	8.18753	1210.7	21.1317	48.1063	399.591	0	13.9868	1.83917	6.33235	31.816	22.8089	0	0	0	0	0	0	0	0	0	0	0	0	0	0	0	0	0	0	0	0	0	0	0	0
COL6A3	chr2_237377069.0_237377088.0	743.643	694.401	829.962	858.96	806.893	467.199	4.25687	654.27	0	663.769	424.746	0	198.778	98.7621	249.464	191.381	314.295	1.78071	1.65807	41.9605	8.27625	25.3294	629.571	1758.34	22.8927	317.237	0	0	0	0	0	0	0	0	0	0	0	0	0	0	0	0	0	0	0	0	0	0
COL6A3	chr2_237387905.0_237387924.0	589.154	814.219	639.559	760.628	805.141	587.197	4.25687	517.096	0	475.553	205.626	0	305.309	91.598	0	1062.96	272.923	79.7758	2.07259	83.921	4.59791	37.9941	230.746	104.102	4753.86	4.92605	0	0	0	0	0	0	0	0	0	0	0	0	0	0	0	0	0	0	0	0	0	0
COL6A6	chr3_130565017.0_130565036.0	285.412	368.532	409.402	400.077	318.026	746.273	0	205.402	0	30.0701	343.781	0	53.563	76.7581	0	157.491	174.466	1.42457	0.829035	97.9078	3.67833	31.6618	926.52	229.552	2.23343	1681.75	0	0	0	4.33187	4.75406	5.46598	0	0	4296.47	0	0	0	0	0	0	0	0	0	0	0	0	0
COL6A6	chr3_130565396.0_130565415.0	823.07	801.511	694.658	569.748	784.114	315.731	4.25687	304.512	0	904.33	1058.33	0	527.893	2.04688	90.402	1759.91	112.248	363.621	2.07259	55.9473	7.35666	37.9941	147.51	2489.39	3.35014	33.4971	11.836	4.60887	7.89901	8.66373	16311.2	19726.7	8.04269	4.52694	6.38027	36.4594	0	0	0	0	0	0	0	0	0	0	0	0
COL6A6	chr3_130566851.0_130566870.0	977.559	715.279	609.569	636.266	974.229	552.615	8.51374	548.696	0	801.869	240.968	0	336.256	2423	1.71649	280.294	3.8485	0	0.414518	27.9737	0	0	43.0641	12.8666	5.02522	16.7486	0	0	0	0	0	0	0	0	0	0	0	0	0	0	0	0	0	0	0	0	0	0
COL6A6	chr3_130567038.0_130567057.0	150.998	224.205	276.189	264.147	208.513	174.983	8.51374	305.23	0	61.2539	405.469	0	164.26	14.3282	0.572165	113.234	11.8662	0.356142	0	41.9605	1.83917	6.33235	1051.86	72.8132	0.558357	4.92605	0	0	0	0	0	0	0	0	0	0	0	0	0	0	0	0	0	0	0	0	0	0
COL6A6	chr3_130574107.0_130574126.0	501.872	545.536	375.924	322.953	245.31	859.009	0	259.984	0	110.257	318.078	0	881.409	2.04688	2.28866	1870.36	153.299	0.712284	157.931	41.9605	6.43708	18.9971	351.261	5.55603	1.11671	16.7486	2.36721	9.21773	1.97475	0	9.50812	13697.8	2.6809	9.05389	3.82816	18.2297	0	0	0	0	0	0	0	0	0	0	0	0
COL6A6	chr3_130658734.0_130658753.0	446.884	602.722	813.224	1037.31	846.318	283.57	0	60.3279	0	147.009	195.345	0	627.877	118.719	1.14433	192.976	98.1369	0.356142	0.829035	27.9737	0	0	100.59	251.776	5.58357	0	0	0	0	0	0	0	0	0	0	0	0	0	0	0	0	0	0	0	0	0	0	0
CPA1	chr7_130381095.0_130381114.0	312.47	476.55	491.7	287.284	657.079	547.774	8.51374	456.768	0	1115.93	866.2	0	626.687	109.508	1.14433	121.607	853.085	0	0.414518	27.9737	0.919583	18.9971	106.375	2.92422	2.23343	1.97042	0	0	0	0	0	0	0	0	0	0	0	0	0	0	0	0	0	0	0	0	0	0
CPA1	chr7_130381131.0_130381150.0	248.754	367.624	466.592	447.315	510.77	241.034	0	292.303	0	942.196	460.731	0	142.239	0	6.86598	51.0351	935.507	0	87.8777	13.9868	1.83917	0	54.6335	294.762	0.558357	13.7929	0	0	1.97475	4.33187	9.50812	5.46598	2.6809	0	2441.09	0	0	0	0	0	0	0	0	0	0	0	0	0
CPA1	chr7_130381825.0_130381844.0	442.52	288.653	587.251	476.236	327.663	364.145	4.25687	448.15	0	70.1635	683.707	0	191.636	496.369	2.28866	587.302	221.93	66.2424	0	13.9868	1.83917	6.33235	15.7473	463.782	1.11671	30.5415	2094.98	0	0	0	4.75406	0	0	9.05389	1.27605	12.1531	0	0	0	0	0	0	0	0	0	0	0	0
CPA1	chr7_130383415.0_130383434.0	593.518	362.178	857.86	887.881	953.203	1737.04	8.51374	448.15	0	385.342	240.326	0	177.948	417.052	2.28866	544.241	468.876	1160.67	4.55969	335.684	8168.66	44.3265	387.577	689.824	3658.36	7.88168	0	0	0	0	0	0	0	0	0	0	0	0	0	0	0	0	0	0	0	0	0	0
CPA1	chr7_130383683.0_130383702.0	652.87	228.744	470.777	436.71	825.291	157.693	4.25687	145.792	0	537.92	441.454	0	155.928	2.5586	0	35.884	64.4624	3.91756	1.24355	97.9078	1.83917	44.3265	1845.97	366.405	1927.45	7.88168	0	0	0	0	0	0	0	0	0	0	0	0	0	0	0	0	0	0	0	0	0	0
CPA1	chr7_130384579.0_130384598.0	307.233	887.744	530.06	490.696	704.389	382.128	0	135.738	0	135.872	881.622	0	131.527	71.6409	0.572165	480.447	8.33843	117.527	0	41.9605	0.919583	6.33235	820.467	173.406	1.11671	25.6154	0	0	0	0	0	0	0	0	0	0	0	0	0	0	0	0	0	0	0	0	0	0
CREBBP	chr16_3739579.0_3739598.0	1407.86	887.744	1844.75	2038.94	1797.77	2408.61	4.25687	1117.5	0	2396.7	883.55	0	263.054	296.798	24.6031	663.855	315.898	168.455	2.90162	41.9605	3.67833	25.3294	102.197	62.286	2.23343	25.6154	0	0	0	0	0	0	0	0	0	0	0	0	0	0	0	0	0	0	0	0	0	0
CREBBP	chr16_3751711.0_3751730.0	2881.18	3462.93	3079.93	2823.67	3505.3	5518.55	4.25687	1620.23	0	1548.05	2017.71	0	1820.55	247.673	16.5928	2675.35	1078.54	5784.82	69.639	419.605	16.5525	170.973	3570.14	514.371	13.4006	584.229	0	0	0	0	0	0	0	0	0	0	0	0	0	0	0	0	0	0	0	0	0	0
CREBBP	chr16_3780785.0_3780804.0	268.829	153.404	1130.56	1223.37	374.973	1076.53	4806	56.0187	0	37.866	31.4865	192.436	17.2592	59.8713	1.71649	22.3278	54.1998	0	0	27.9737	0	6.33235	0.964121	5.84845	0	0	7.10163	23.0443	3479.51	4.33187	19.0162	5.46598	0	9.05389	2268.82	24.3063	4.50203	26.7876	3771.82	1.33922	1.86992	8109.97	5.56661	19.2688	6342.18	2.64664	8973.42	1.83908
CREBBP	chr16_3780863.0_3780882.0	514.964	285.022	1242.85	1225.29	499.38	1960.09	4.25687	400.749	0	415.412	110.524	0	969.49	111.555	1.14433	104.064	49.0684	2.13685	0.414518	13.9868	2.75875	18.9971	26.0313	19.2999	0.558357	0.985209	0	0	0	0	4.75406	0	0	0	1.27605	0	0	0	0	0	0	0	4102.59	0	2.61318	0	0	0
CREBBP	chr16_3793475.0_3793494.0	1018.58	697.124	1103.36	1441.24	706.141	788.808	4.25687	326.058	0	377.546	246.109	0	223.179	222.598	99.5567	283.484	101.665	129.636	1.24355	13.9868	0.919583	18.9971	215.32	9.94236	0.558357	10.8373	0	0	0	0	0	0	0	0	0	0	0	0	0	0	0	0	0	0	0	0	0	0
CREBBP	chr16_3850333.0_3850352.0	1486.41	851.436	1897.06	2309.84	1340.44	3904.27	8.51374	1267.6	0	911.012	965.8	0	1345.03	172.962	21.1701	1783.83	1039.74	154.922	4.55969	307.71	28898.8	151.976	101.875	14.3287	11.1671	64.0386	0	0	0	0	0	0	0	0	0	0	0	0	0	0	0	0	0	0	0	0	0	0
CRHBP	chr5_76953194.0_76953213.0	539.403	499.243	416.376	464.667	777.106	55.6765	4.25687	624.106	0	527.897	283.378	0	292.216	1.02344	1.71649	23.1253	30.788	0	0	0	0.919583	0	23.7816	124.864	0.558357	0.985209	0	0	0	0	0	0	0	0	0	0	0	0	0	0	0	0	0	0	0	0	0	0
CRHBP	chr5_76953683.0_76953702.0	444.266	413.01	573.302	769.304	360.079	667.427	12.7706	354.785	0	418.754	388.762	0	179.734	58.8479	718.639	1868.76	350.855	2.13685	0.829035	83.921	7.35666	44.3265	319.445	1504.81	16.1924	6.89647	0	0	0	0	0	0	0	0	0	0	0	0	0	0	0	0	0	0	0	0	0	0
CRHBP	chr5_76954103.0_76954122.0	898.132	612.707	560.748	435.746	624.663	385.586	4.25687	517.096	0	554.626	681.136	0	996.271	318.29	4.57732	533.476	56.7654	0.712284	0.414518	13.9868	1.83917	12.6647	38.2435	4.67876	1.11671	5.91126	0	0	0	0	0	0	0	0	0	0	0	0	0	0	0	0	0	0	0	0	0	0
CRHBP	chr5_76955657.0_76955676.0	519.328	431.164	643.744	751.951	403.885	165.3	4.25687	1814.86	0	347.476	1012.71	0	466.593	88.5277	2.86082	133.568	0.320709	47.723	0	27.9737	1.83917	6.33235	81.6289	58.4845	0	1567.47	0	0	0	0	0	0	0	0	0	0	0	0	0	0	0	0	0	0	0	0	0	0
CRHBP	chr5_76955741.0_76955760.0	347.383	917.699	574.697	568.784	577.354	213.023	4.25687	356.94	0	482.235	444.024	0	523.132	124.348	4.57732	742.002	75.3665	0.356142	0	0	0	6.33235	152.974	103.225	0.558357	0.985209	0	0	0	0	0	0	0	0	0	0	0	0	0	0	0	0	0	0	0	0	0	0
CRHBP	chr5_76958814.0_76958833.0	463.468	517.397	322.221	398.149	403.885	152.851	0	88.3372	0	357.5	532.058	0	116.648	156.075	136.175	102.868	17.3183	0.356142	0.829035	13.9868	0.919583	6.33235	72.6304	3.80149	0	0	0	0	0	0	0	0	0	0	0	0	0	0	0	0	0	0	0	0	0	0	0	0
CRTAC1	chr10_97884243.0_97884262.0	553.368	376.701	547.496	352.839	700.884	307.777	2315.74	165.902	0	438.8	996.644	96.2182	330.305	333.642	0.572165	183.806	110.645	406.002	0	55.9473	0	0	23.1389	11.6969	1.67507	8.86689	7.10163	0	3.9495	21.6593	14.2622	0	4747.87	5319.16	3.82816	6.07657	0	0	0	0	0	0	0	0	0	0	0	1.83908
CRTAC1	chr10_97908083.0_97908102.0	601.373	594.553	749.058	844.499	543.185	972.091	4.25687	963.091	0	933.286	783.307	0	586.812	36.3322	308.969	232.847	149.45	79.0635	0.414518	0	1.83917	0	25.7099	42.9861	1.67507	610.83	0	0	0	0	0	0	0	0	0	0	0	0	0	0	0	0	0	0	0	0	0	0
CRTAC1	chr10_97917606.0_97917625.0	1479.43	933.13	1041.99	1097.08	1203.77	1282.29	8.51374	1090.93	0	759.548	937.527	0	404.698	105.926	8.01031	1278.67	268.112	2.13685	4.55969	139.868	3.67833	37.9941	209.857	293.885	4749.39	6.89647	0	0	0	0	0	0	5.3618	4.52694	0	6.07657	0	0	0	0	0	0	0	0	0	0	0	0
CRTAC1	chr10_97923353.0_97923372.0	1008.98	784.265	618.636	750.987	758.707	318.497	0	234.848	0	268.403	632.3	0	188.066	16.8868	1.71649	71.7681	1327.41	3724.53	1034.22	97.9078	5.5175	69.6559	66.5243	9.94236	11.7255	15.7634	0	0	3291.91	8.66373	9.50812	0	10.7236	0	0	12.1531	0	0	0	0	0	0	0	0	0	0	0	0
CRTAC1	chr10_98011144.0_98011163.0	809.977	689.863	617.241	382.724	736.805	108.932	0	412.959	0	285.109	416.393	0	430.884	45.0314	0	54.2248	84.9878	1.42457	424.466	13.9868	1.83917	12.6647	79.0579	54.683	1.11671	777.33	0	0	0	0	0	0	0	0	0	0	0	0	0	0	0	0	0	0	0	0	0	0
CRTAC1	chr10_98011243.0_98011262.0	488.779	423.902	456.828	428.998	742.061	735.898	0	803.653	0	668.224	297.515	0	317.212	11.2579	4.00515	103.665	208.461	300.584	3.31614	181.829	2.75875	37.9941	260.634	917.914	6247.46	27.5859	0	0	0	0	0	0	0	0	0	0	0	0	0	0	0	0	0	0	0	0	0	0
CRYAB	chr11_111910328.0_111910347.0	882.421	491.073	607.477	356.695	510.77	297.748	4.25687	336.831	0	283.995	537.841	0	667.157	80.8518	1.14433	251.188	407.941	1.42457	16.1662	13.9868	0.919583	0	230.103	15.4984	2.79179	0	7.10163	0	3.9495	4.33187	14656.8	10.932	0	4.52694	1.27605	6.07657	0	0	0	0	0	0	0	0	0	0	0	0
CRYAB	chr11_111910391.0_111910410.0	664.216	748.864	820.896	717.246	671.973	373.136	0	883.372	0	813.006	937.527	0	295.192	32.7501	42.3402	297.439	304.353	0.356142	16.5807	13.9868	1.83917	18.9971	463.742	152.352	0	2.95563	0	0	0	0	0	0	0	0	0	0	0	0	0	0	0	0	0	0	0	0	0	0
CRYAB	chr11_111911531.0_111911550.0	576.934	246.898	467.987	394.292	667.592	604.488	0	147.947	4149.29	92.4376	177.995	0	574.314	761.952	0.572165	558.993	203.009	0.712284	0.414518	13.9868	0	6.33235	24.4244	23.3938	1.67507	2.95563	4.73442	0	0	0	0	0	0	0	0	0	0	0	0	0	0	0	0	0	0	0	2.95957	0
CRYAB	chr11_111911588.0_111911607.0	525.438	540.09	640.257	642.051	412.646	834.456	0	1631.01	0	461.074	242.253	0	611.808	455.431	4.00515	195.369	1143.97	1.06843	2.48711	13.9868	2.75875	12.6647	459.243	6.43329	2.23343	1066	0	0	0	0	0	0	0	0	0	0	0	0	0	0	0	0	0	0	0	0	0	0
CRYAB	chr11_111911640.0_111911659.0	324.689	78.0634	391.965	337.414	274.221	137.981	0	27.2912	0	211.604	435.028	0	292.216	23.0274	1.71649	70.1732	116.097	0.356142	0	0	0	0	299.52	3.80149	0.558357	12.8077	0	0	0	0	0	0	0	0	0	0	0	0	0	0	0	0	0	0	0	0	0	0
CRYAB	chr11_111911707.0_111911726.0	1303.12	1316.19	1339.1	959.22	1220.41	2426.94	0	1324.34	0	2098.22	1657.86	0	1109.94	734.831	213.99	18113.9	1915.59	86.1864	5.38873	335.684	22.9896	164.641	627.643	179.547	11011.4	1027.57	0	4.60887	0	0	0	0	0	0	0	0	0	0	0	0	0	0	0	0	0	0	0	0
CSF3	chr17_40015784.0_40015803.0	693.019	1207.26	476.357	352.839	598.38	472.386	8.51374	917.845	0	272.858	461.374	0	886.765	124.86	2.28866	385.155	159.072	4.27371	6703.99	195.816	11.035	101.318	2678.65	42.9861	6.14193	18.719	0	0	0	0	0	0	0	0	0	0	0	13.3938	2.264	0	0	0	4063.63	0	2.61318	0	0	0
CSF3	chr17_40016255.0_40016274.0	494.016	282.299	407.309	579.388	384.61	169.45	4.25687	153.692	0	214.945	77.1098	0	241.629	34.2853	0	110.443	0	0	0.414518	0	0.919583	0	93.5197	35.968	1.11671	0	0	0	0	0	0	0	0	0	0	0	0	0	0	0	0	0	0	0	0	0	0	0
CSF3	chr17_40016491.0_40016510.0	779.429	876.852	595.62	740.383	608.017	180.862	4.25687	522.842	0	211.604	1169.5	0	843.319	467.201	4.00515	70.1732	13.4698	0.356142	0	13.9868	0.919583	18.9971	68.4526	19.0075	0	210.835	0	0	0	0	0	0	0	0	0	0	0	0	0	0	0	0	0	0	0	0	0	0
CSF3	chr17_40016560.0_40016579.0	655.488	1030.26	811.131	1040.2	667.592	98.212	1864.51	760.562	0	251.698	532.7	0	471.354	56.2893	1.14433	62.199	122.19	18.8755	413.274	27.9737	0	0	31.1732	146.211	1.11671	198.027	0	0	0	0	0	0	0	0	0	0	0	22046.2	0	1.33922	455.324	0	2.7833	0	0	0	0	0
CSF3	chr17_40016561.0_40016580.0	1423.57	1148.26	933.185	637.231	1129.3	468.928	0	618.361	0	238.333	1056.4	0	313.641	82.8987	2.86082	334.519	411.469	1057.39	0	41.9605	1.83917	6.33235	68.4526	8.48025	1.11671	76.8463	0	0	0	0	0	0	0	0	0	0	0	0	0	0	0	0	0	0	0	0	0	0
CSF3	chr17_40016791.0_40016810.0	995.888	1413.31	538.429	576.496	424.035	166.338	8.51374	460.359	0	269.517	813.508	0	645.731	1387.79	10.299	80.9384	10.9041	3.91756	0.414518	69.9342	3.67833	18.9971	1986.09	357.34	12.2839	0.985209	0	0	0	0	0	0	0	0	0	0	0	0	0	0	0	0	0	0	0	0	0	0
CSMD1	chr8_2950325.0_2950344.0	113.467	199.697	247.594	190.88	350.442	61.5554	4.25687	104.137	0	64.595	624.589	0	105.936	0.511721	0.572165	8.37294	434.24	0	0	27.9737	0	6.33235	33.4229	3.50907	0	37.438	0	0	0	0	0	0	0	0	0	0	0	0	0	0	0	0	0	0	0	0	0	0
CSMD1	chr8_3214486.0_3214505.0	983.669	1642.05	457.525	441.53	509.893	496.247	4.25687	501.296	0	623.676	690.133	0	341.018	447.244	0	213.709	878.742	0.356142	0	27.9737	4.59791	6.33235	756.513	94.16	1.11671	15.7634	0	0	0	0	0	0	0	0	0	0	0	0	0	0	0	0	0	0	0	0	0	0
CSMD1	chr8_3230197.0_3230216.0	646.76	838.728	549.589	460.811	540.557	530.483	12.7706	1078.72	0	2506.95	688.847	0	831.416	635.557	65.2268	828.124	28.2224	0.712284	0	0	1.83917	6.33235	98.3403	65.795	1.67507	24.6302	0	0	0	0	0	0	0	0	0	0	0	0	0	0	0	0	0	0	0	0	0	0
CSMD1	chr8_3343316.0_3343335.0	593.518	633.584	726.043	550.467	747.318	587.889	0	251.366	0	619.221	409.967	0	407.674	237.438	2.28866	298.236	189.86	0	95.7536	0	0.919583	6.33235	281.523	48.8345	1.11671	11.8225	0	0	0	0	0	0	0	0	0	0	0	0	0	0	0	0	0	0	0	0	0	0
CSMD1	chr8_3396300.0_3396319.0	774.192	619.061	652.811	786.657	680.734	927.827	4.25687	912.1	0	420.981	857.204	0	379.107	3.07032	133.314	586.505	2473.31	708.011	1.65807	83.921	1.83917	37.9941	1057.32	206.743	2.79179	1.97042	0	0	0	0	0	0	0	0	0	0	0	0	0	0	0	0	0	0	0	0	0	0
CSMD1	chr8_3574999.0_3575018.0	555.114	767.018	503.557	497.445	532.672	153.543	0	558.033	0	600.288	1238.25	0	160.094	226.692	1.14433	45.0544	154.261	1055.25	1.65807	55.9473	4.59791	18.9971	341.62	1724.71	367.399	5.91126	0	0	0	0	0	0	0	0	0	0	0	0	0	0	0	0	0	0	0	0	0	0
CSMD3	chr8_112292590.0_112292609.0	688.655	298.638	538.429	563.963	557.203	519.071	1162.13	414.395	0	902.102	364.986	0	216.037	1072.57	2.86082	148.321	17.9597	1.06843	0.414518	13.9868	0.919583	12.6647	63.3106	316.693	0	13.7929	7.10163	13.8266	3.9495	8.66373	25229.8	21.8639	5.3618	4.52694	2.55211	18.2297	0	0	0	0	0	0	0	0	0	0	0	0
CSMD3	chr8_112318830.0_112318849.0	267.083	237.821	387.781	315.241	243.557	142.822	12.7706	23.7002	0	169.283	64.2582	0	2418.67	1168.77	6.29381	98.083	59.9725	0	0	0	0	0	22.4962	108.781	0	0	0	0	0	0	0	0	0	0	0	0	0	0	0	0	0	0	0	0	0	0	0	0
CSMD3	chr8_112517195.0_112517214.0	777.683	1191.83	859.953	692.181	809.522	1787.18	0	1432.79	0	453.279	1149.58	0	1489.65	3254.54	8.01031	906.271	168.051	491.12	1.24355	41.9605	0.919583	25.3294	135.62	95.0373	1.11671	0.985209	0	0	0	0	0	0	0	0	0	0	0	0	0	0	0	0	0	0	0	0	0	0
CSMD3	chr8_112636832.0_112636851.0	1206.24	819.666	961.78	919.694	924.291	1455.54	8.51374	1997.28	0	830.825	675.996	0	391.01	69.594	2.86082	387.946	195.312	1.06843	0.829035	13.9868	1.83917	12.6647	46.5992	262.888	1.67507	6.89647	0	0	0	0	0	0	0	0	0	0	0	0	0	0	0	0	0	0	0	0	0	0
CSMD3	chr8_112682586.0_112682605.0	301.996	864.144	183.429	167.743	145.434	81.267	0	101.265	0	278.427	480.651	0	104.15	3.58204	0	234.044	147.526	0	0.414518	13.9868	0.919583	6.33235	23.4603	1.16969	0.558357	0	0	0	0	0	0	0	0	0	0	0	0	0	0	0	0	0	0	0	0	0	0	0
CSMD3	chr8_113173843.0_113173862.0	617.084	420.272	534.942	497.445	416.15	939.239	0	182.42	0	133.645	636.156	0	1598.56	172.962	8.58247	701.333	57.0861	0.712284	0.829035	41.9605	3.67833	12.6647	76.4869	67.2572	1.67507	10.8373	0	0	0	0	0	0	0	0	0	0	0	0	0	0	0	0	0	0	0	0	0	0
CSN1S1	chr4_69932564.0_69932583.0	607.483	585.475	700.237	812.686	862.964	659.127	4.25687	666.479	0	407.617	375.91	0	572.529	431.38	3.43299	130.777	246.625	1.42457	1.24355	27.9737	3.67833	12.6647	63.632	419.041	2.79179	657.135	0	0	0	0	0	0	0	0	0	0	0	0	0	0	0	0	0	0	0	0	0	0
CSN1S1	chr4_69934220.0_69934239.0	238.28	432.98	318.733	370.191	342.557	37.3482	4.25687	178.111	0	335.226	185.063	0	296.382	4262.63	1.14433	9.96779	250.473	990.787	0.414518	41.9605	0	6.33235	492.666	16.0832	0	2.95563	0	0	0	0	0	0	0	0	0	0	0	0	0	0	0	0	0	0	0	0	0	0
CSN1S1	chr4_69935928.0_69935947.0	246.135	187.897	286.651	314.277	284.734	80.2295	4.25687	12.9274	0	275.085	190.204	0	718.339	181.661	5.14948	17.942	1.60354	604.729	0.829035	27.9737	0.919583	6.33235	57.5259	2.33938	0.558357	599.993	0	0	0	0	0	0	0	0	0	0	0	0	0	0	0	0	0	0	0	0	0	0
CSN1S1	chr4_69937123.0_69937142.0	1300.5	1482.3	831.357	834.859	1002.26	814.745	17.0275	360.531	0	843.076	1517.14	0	296.977	39.9142	31.4691	368.808	2008.6	0.712284	1.24355	13.9868	0	18.9971	142.369	45.0331	3.9085	15.7634	0	0	0	0	0	0	0	0	0	0	0	0	0	0	0	0	0	0	0	0	0	0
CSN1S1	chr4_69939187.0_69939206.0	357.856	223.298	550.983	579.388	560.708	482.415	4.25687	390.695	0	170.397	330.287	0	568.958	49.1252	24.6031	761.938	388.058	172.729	23.213	55.9473	9.19583	69.6559	353.832	48.8345	6401.01	6.89647	0	0	0	0	0	0	0	0	0	0	0	0	0	0	0	0	0	0	0	0	0	0
CSN1S1	chr4_69944880.0_69944899.0	668.58	590.922	822.988	958.256	1072.35	696.475	8.51374	507.041	0	526.783	842.424	0	390.415	1.02344	8.58247	698.144	261.698	1684.55	4.14518	279.737	20.2308	120.315	101.554	9678.6	53.044	4672.85	0	0	0	0	0	0	0	0	0	0	0	0	0	0	0	0	0	0	0	0	0	0
CSN3	chr4_70244863.0_70244882.0	143.143	108.018	123.448	113.757	129.664	33.1984	0	75.4098	0	25.6152	26.3458	0	24.4009	0	0	6.77809	16.0354	0	0	0	0	0	2.24962	0	0	0	0	0	0	0	0	0	0	0	0	0	0	0	0	0	0	0	0	0	0	0	0	0
CSN3	chr4_70249101.0_70249120.0	447.757	486.535	686.986	706.641	882.238	1058.2	114.935	636.315	0	596.947	452.377	0	169.616	331.595	2.28866	338.905	1018.57	248.587	0	0	2.75875	6.33235	15.7473	32.4589	2.79179	5.91126	0	0	0	0	0	0	0	0	0	0	0	9683.71	2.264	0	0	0	2.7833	4.8172	0	0	0	0
CSN3	chr4_70249141.0_70249160.0	838.78	1351.59	702.33	547.575	1065.34	236.885	8.51374	329.649	0	614.766	197.915	96.2182	282.694	148.399	3.43299	162.674	192.105	590.84	0.414518	55.9473	0.919583	18.9971	1945.92	8.48025	12.8422	2.95563	0	0	0	0	0	0	0	0	0	0	0	0	0	0	0	0	0	0	0	2.64664	6374.92	1.83908
CSN3	chr4_70249176.0_70249195.0	493.144	1343.42	718.371	804.974	1162.59	513.884	4.25687	1501.01	0	1396.59	1116.81	0	335.661	123.325	2.28866	117.62	176.069	6.7667	158.346	223.789	5.5175	56.9912	810.183	97.0842	1.11671	8220.59	0	0	0	0	0	0	0	0	0	0	4.50203	0	2.264	1.33922	0.934958	7.68718	0	14249.3	0	0	0	0
CSN3	chr4_70249225.0_70249244.0	1160.85	1699.24	1164.04	952.472	1137.18	3609.64	0	288.712	0	665.996	816.721	0	265.434	81.8753	4.00515	2430.94	3277	4.27371	1.65807	69.9342	10.1154	31.6618	659.137	38.3073	5.02522	15.7634	0	0	0	0	0	0	0	0	0	0	0	0	0	0	0	0	0	0	0	0	0	0
CSN3	chr4_70249255.0_70249274.0	1008.98	609.984	498.675	366.335	529.168	121.728	12.7706	442.404	0	643.722	562.901	0	1837.81	706.686	2.86082	4.38583	163.241	284.558	0.829035	0	0	0	37.9221	5.84845	0	0.985209	0	0	0	0	0	0	0	0	0	0	0	0	0	0	0	0	0	0	0	0	0	0
CSNK2B	chr6_GL000254v2_alt_3008700.0_3008719.0	44.5138	110.741	267.122	206.305	109.513	100.633	0	0	0	7.79594	78.395	0	62.4901	0	53.7835	25.5175	20.8461	0.356142	0	0	0.919583	6.33235	0	0	0.558357	0	0	0	0	0	0	0	0	0	0	0	0	0	0	0	0	0	0	0	0	0	0	0
CSNK2B	chr6_GL000254v2_alt_3009772.0_3009791.0	452.994	311.346	229.46	206.305	146.31	159.767	0	254.239	0	213.832	849.493	0	161.284	57.3127	0.572165	31.8969	60.9347	0.356142	0.414518	27.9737	1.83917	12.6647	474.347	1.16969	824.136	1.97042	0	0	0	0	0	0	0	0	0	0	0	0	0	0	0	0	0	0	0	0	0	0
CSNK2B	chr6_GL000254v2_alt_3009798.0_3009817.0	514.091	363.993	749.756	555.287	297	569.215	4.25687	756.971	0	356.386	222.976	0	158.308	125.372	0.572165	32.6943	177.673	0.356142	1.24355	13.9868	1.83917	12.6647	62.3465	11.6969	0	0	0	0	0	0	0	0	0	0	0	0	0	0	0	0	0	0	0	0	0	0	0	0
CSNK2B	chr6_GL000254v2_alt_3010464.0_3010483.0	175.437	239.636	341.052	308.493	438.053	133.831	0	403.622	0	545.716	317.435	0	445.168	19.4454	1644.97	106.456	577.276	0	2.07259	111.895	1.83917	25.3294	2041.04	20.762	2.79179	8.86689	0	0	0	0	0	0	0	0	0	0	0	0	0	0	0	0	0	0	0	0	0	0
CSNK2B	chr6_GL000254v2_alt_3010966.0_3010985.0	157.98	22.6928	361.278	306.565	319.779	95.4455	0	162.311	0	738.387	253.177	0	159.499	84.9456	587.041	37.4789	4.48992	4.98599	2.07259	139.868	19471.2	50.6588	139.155	3.80149	6.14193	29.5563	0	0	0	0	0	0	0	0	0	0	0	0	0	0	0	0	0	0	0	0	0	0
CSNK2B	chr6_GL000254v2_alt_3011236.0_3011255.0	293.268	193.343	565.63	667.116	489.743	1065.12	0	108.447	0	207.149	15.422	0	63.6804	53.7307	0.572165	72.9642	84.3464	0	0.414518	83.921	0.919583	6.33235	670.064	2.6318	0.558357	17.7338	0	0	0	0	0	0	0	0	0	0	0	0	0	0	0	0	0	0	0	0	0	0
CTCF	chr16_67610950.0_67610969.0	2066.84	1676.55	1708.75	1840.35	2235.82	1055.09	46.8256	5186.76	0	8328.3	4052.12	0	4169.58	473.853	755.83	1615.18	887.722	545.966	20.3114	237.776	12.8742	101.318	7334.39	811.472	15.634	7281.68	0	0	0	0	0	0	0	0	0	0	0	0	0	0	0	0	0	0	0	0	0	0
CTCF	chr16_67611459.0_67611478.0	346.51	459.303	859.953	1203.12	764.84	654.977	8.51374	3639.78	0	1156.03	1817.86	0	1054	0	3.43299	281.49	3359.42	1.42457	1.65807	111.895	5.5175	25.3294	1059.57	52.636	2.79179	6.89647	0	0	0	0	0	0	0	0	0	0	0	0	0	0	0	0	0	0	0	0	0	0
CTCF	chr16_67611997.0_67612016.0	892.895	974.885	878.784	944.759	1123.17	121.036	12.7706	4088.65	0	4615.2	1299.3	0	1374.19	120.766	10.8711	106.057	225.138	1016.79	1965.64	125.882	6.43708	37.9941	2233.55	1057.69	5.58357	46.3048	0	0	0	0	0	0	0	0	0	0	0	0	1851.95	0	0.934958	0	5.56661	0	0	0	0	0
CTCF	chr16_67620756.0_67620775.0	766.336	630.861	1299.34	1400.75	745.566	1789.6	4.25687	4018.99	0	849.758	273.74	0	1534.88	1387.79	234.015	1444.53	1600.34	6.05442	5.38873	223.789	11.035	44.3265	174.184	440.388	3.35014	9364.42	0	0	0	0	0	0	0	0	0	0	0	0	0	0	0	0	0	0	0	0	0	0
[truncated: 2,900 more rows]
[truncated: 50 more columns]

## Sheet: Rank
Gene	H_9	H_12	H_15	H_18	H_19	H_20	H_21	H_22	H_25	H_26	H_27	H_28	H_29	H_30	H_31	H_32	H_33	H_34	H_35	H_36	H_37	H_38	H_39	H_40	H_41	H_42	H_43	H_44	H_45	H_46	H_47	H_48	H_49	H_50	231_3	231_4	231_5	231_6	231_7	231_8	231_9	231_10	231_11	231_12	231_13	231_14	231_15	231_16	231_17
[truncated: 104 more rows]
[truncated: 27 more columns]

[truncated: 2 more sheets: Score, sLib]
