# Supplementary material
Source: Research Square preprint supplement (doi:10.21203/rs.3.rs-8902045/v1)
Supplement: Supplementary file 5 [file 93e3bfd6ef4097611417097e.xlsx]

## Sheet: Legend
Sheet	Legend
mBRCA-KO	Mouse BRCA CRISPR KO library sgRNAs
Group	Group detail in mBRCA-KO screen
Count	Count for each sgRNA in mBRCA-KO screen
Rank	Rank for 29 high-confidence metastasis genes in screens
Score	β Score for each gene in mBRCA-KO screens

## Sheet: mBRCA-KO
sgRNA	Gene	ID	Sequence
sg047496	Cdh20	chr1_104942085_104942114	TGGATAACAGATGTACCTG
sg088261	Cdh20	chr1_104953960_104953989	AGCCAGGCTCAAACACAGG
sg047497	Cdh20	chr1_104970816_104970845	GCAGGTACTCCATTGACAG
sg006213	Cdh20	chr1_104974990_104975019	TAGACAATCCCTCCCAAGT
sg006214	Cdh20	chr1_104984739_104984768	CCATCCTCATCGCAGACAG
sg088262	Cdh20	chr1_104994269_104994298	CTCTGCTCTGAGTCCGAGG
sg028329	Prex2	chr1_11140230_11140259	TTCAGATTAAATCCAACGA
sg109953	Prex2	chr1_11140307_11140336	GAAAAGGGGTCGAATGCCG
sg028328	Prex2	chr1_11160168_11160197	ATATACAACCCCATACTCG
sg069094	Prex2	chr1_11160193_11160222	TATGAGTATGATAGCACGG
sg069093	Prex2	chr1_11170589_11170618	GTGTGCTGAATATACACCA
sg109954	Prex2	chr1_11199964_11199993	GACTTGTGAAGCCAGCAGG
sg102338	Marco	chr1_120476644_120476673	TTACTATAACAATGAGTGG
sg020128	Marco	chr1_120488183_120488212	AGGTCTCACTGGCCCCAAG
sg061467	Marco	chr1_120488553_120488582	TGCACCCGTAAGTCCCTGG
sg061468	Marco	chr1_120492077_120492106	AGCTGGCCCAGGCAGCCCG
sg102337	Marco	chr1_120493621_120493650	TCCAGATTAAAGGTGAACG
sg020129	Marco	chr1_120494187_120494216	AATGGATCACTAGCTATCG
sg117465	Thsd7b	chr1_129595535_129595564	CCAGTCGGAAACCTCCCAC
sg035886	Thsd7b	chr1_129595824_129595853	CTGCAGCATAGAACTCGTG
sg035887	Thsd7b	chr1_129678156_129678185	GCAATACAGATCCCTTCCG
sg076625	Thsd7b	chr1_129758595_129758624	GCGAGGATAGAACGTGACC
sg076624	Thsd7b	chr1_129760438_129760467	GTGGGCATTCAGACACGAA
sg117464	Thsd7b	chr1_129921303_129921332	TAAACGTATCACAGGGACA
sg046225	C4bp	chr1_130636327_130636356	TCTTGTTGCCTGTAAGCGC
sg004950	C4bp	chr1_130636849_130636878	GCTCTATGTCAGAAACCAG
sg086986	C4bp	chr1_130648077_130648106	CACAGTGCAGCCTATGAAG
sg046224	C4bp	chr1_130648135_130648164	ACTTCTACCCATATAACCA
sg086985	C4bp	chr1_130648391_130648420	TCTGGGAAAGGATTACTCC
sg004949	C4bp	chr1_130655929_130655958	CTATGGTAGGGGAATATCA
sg067928	Pigr	chr1_130841763_130841792	ACACTGGGAGCTACAAGTG
sg108789	Pigr	chr1_130841784_130841813	GCCTGGGTACCAGTAACCG
sg108788	Pigr	chr1_130844882_130844911	TGTGATCATTAACACCCTG
sg067929	Pigr	chr1_130846459_130846488	CTGGGTCCCCACAAGCACG
sg027161	Pigr	chr1_130846507_130846536	CTGATCAAACAGTGCCAGT
sg027162	Pigr	chr1_130849039_130849068	CTGCCAGCACCAGACCCAG
sg060375	Lgr6	chr1_134987575_134987604	TAGAGCTTGATGTAGGCGC
sg019031	Lgr6	chr1_134987962_134987991	TAGGTCAAGGCGTCCACCG
sg060374	Lgr6	chr1_134988109_134988138	AGTACGGAGAGTAACACGA
sg019032	Lgr6	chr1_134993910_134993939	TTTCATCCAGAGGAAGAGG
sg101245	Lgr6	chr1_134997643_134997672	GGTACTTACAGCTTAACCA
sg101246	Lgr6	chr1_135104924_135104953	TCACAGGTAAGCCGTCAGG
sg019217	Lmod1	chr1_135363979_135364008	CAGGGAGTGTCAAGAACGC
sg060561	Lmod1	chr1_135364041_135364070	GAGCCCAGCAAGAAAGAGG
sg060560	Lmod1	chr1_135364113_135364142	AGGCTGAAAGAGTCAAGCA
sg101432	Lmod1	chr1_135364131_135364160	AAGGAGAACAAGAAACCAG
sg101431	Lmod1	chr1_135364497_135364526	ACTCGGGCTGACGACCATG
sg019218	Lmod1	chr1_135364824_135364853	CGGCTGCAAGAGCAAAAGC
sg069850	Ptprc	chr1_138064590_138064619	AAGCCCAGGAAGACAGCAG
sg029088	Ptprc	chr1_138080149_138080178	TGTCAAGCTAAGGCGACAG
sg029087	Ptprc	chr1_138094267_138094296	TTCACAATGGAGTGTACGA
sg110709	Ptprc	chr1_138111192_138111221	TAGCAGAAATCTTATATCG
sg069849	Ptprc	chr1_138115611_138115640	CCACAACGAAGCAAACATG
sg110710	Ptprc	chr1_138120030_138120059	CACTCACGCCTGCTCCCGG
sg077758	Tpr	chr1_150409273_150409302	CCTGGCATGAAATTAACTG
sg118596	Tpr	chr1_150414498_150414527	CCCGTCATTGACTCCACAG
sg037021	Tpr	chr1_150423865_150423894	ATCGAAAAATTAAGTGACA
sg037020	Tpr	chr1_150429382_150429411	GGAAGACTTAAGTAAAGCA
sg077759	Tpr	chr1_150432567_150432596	AGAGCGACACCTTGAGCAG
sg118597	Tpr	chr1_150443182_150443211	GAGAATTCAGATGACCCGG
sg098301	Hmcn1	chr1_150638969_150638998	AATGCAGGATAATTCAAGT
sg098302	Hmcn1	chr1_150649723_150649752	ATCCGAGGTAATAAAGAAG
sg057443	Hmcn1	chr1_150697487_150697516	ACCACATCAGAGTAGGGGG
sg016115	Hmcn1	chr1_150720643_150720672	GTGGCAACAAACATTGCAG
sg057442	Hmcn1	chr1_150722464_150722493	CATCCACATCGAAGCCGGT
sg016114	Hmcn1	chr1_150758438_150758467	GTTCTTGTATGAAAACCGG
sg087062	Cacna1e	chr1_154425858_154425887	AAGGAGACAAAATAAACGT
sg046300	Cacna1e	chr1_154442197_154442226	GACTACAAAGTGCCACACA
sg046301	Cacna1e	chr1_154472309_154472338	TGTGACCCAATCCAGCAGG
sg005025	Cacna1e	chr1_154472670_154472699	TTGTTCCCACACAGACATG
sg005026	Cacna1e	chr1_154486594_154486623	TTGGGACTTGACCATGTGG
sg087061	Cacna1e	chr1_154486653_154486682	AAGAGCACAAAAGTAGATG
sg043900	Angptl1	chr1_156844704_156844733	CTTTCCCATCAGTAGCACG
sg002635	Angptl1	chr1_156844926_156844955	GACGGGAACATTGTAAACG
sg084650	Angptl1	chr1_156845137_156845166	TTATTGACAAGATCCGTCA
sg002636	Angptl1	chr1_156845232_156845261	GTACCACCTGGACAAGAGG
sg084649	Angptl1	chr1_156845253_156845282	GGCTGTTAGGACTGTGTCG
sg043901	Angptl1	chr1_156860531_156860560	TCTGGGCTGAATACAGAGG
sg085591	Astn1	chr1_158502088_158502117	GATGATCCTGTACACTCGC
sg085592	Astn1	chr1_158509909_158509938	GACATGAGAAGAGCACACG
sg044842	Astn1	chr1_158511060_158511089	CATGGACCTCTGTGCCCGG
sg003576	Astn1	chr1_158520507_158520536	TGAATGGGGGACCAACCAG
sg003575	Astn1	chr1_158572959_158572988	CTTACACGATATTTCAGCG
sg044841	Astn1	chr1_158597223_158597252	GCTCAGATGGTTTCAACGG
sg107826	Pappa2	chr1_158814409_158814438	CTGGTGGGCATCTCAGCAG
sg107825	Pappa2	chr1_158845027_158845056	CTCTGAGCCACATTCACGG
sg026188	Pappa2	chr1_158854876_158854905	GGCAGCCAATGGATAGTAA
sg066961	Pappa2	chr1_158936181_158936210	ATTAACAAGCACAACCCGG
sg066960	Pappa2	chr1_158936238_158936267	CTGCCAGCTGATATTGTAG
sg026187	Pappa2	chr1_158957104_158957133	GGTCTCGGGGAATACCACT
sg021863	Myoc	chr1_162639359_162639388	TGCCAATACACCTTCACTG
sg104065	Myoc	chr1_162639467_162639496	GCAGACCTAGAGTCCACCA
sg063196	Myoc	chr1_162639649_162639678	TAAAGCCGACTTATCTCGA
sg021864	Myoc	chr1_162639725_162639754	AGGCTAGAAAGCAGCAGCG
sg104066	Myoc	chr1_162648678_162648707	GGGGAGCCTCTATTTCCAG
sg063197	Myoc	chr1_162648840_162648869	CGTGCTGTAGATGACCCAG
sg053693	Fmo2	chr1_162880519_162880548	GACTCACTTGTTAAAGTGG
sg012388	Fmo2	chr1_162880560_162880589	AAAGAGAACGTATACCCCG
sg094486	Fmo2	chr1_162886294_162886323	CAAAAGCATCGCACCTGCG
sg053692	Fmo2	chr1_162886388_162886417	CGCGAATACAAGCACCCAG
sg012389	Fmo2	chr1_162887602_162887631	ACGCTGTTATGGTTTGCAG
sg094487	Fmo2	chr1_162888868_162888897	TTGCTACTTTAGGAAAACG
sg091945	Dpt	chr1_164796762_164796791	CACTGGTGACCACAGCCTG
sg009869	Dpt	chr1_164796878_164796907	TGTCCCCACGGGCAAGTGG
sg009868	Dpt	chr1_164796965_164796994	CCTACACCCCAAAGCCTGG
sg091944	Dpt	chr1_164808920_164808949	CAACAATGGATTGGTGGCG
sg051162	Dpt	chr1_164808962_164808991	ATCAGTGCTGGATCGTGAG
sg051163	Dpt	chr1_164808992_164809021	CTGCTGCCGCTATAGCAAG
sg071879	Rxrg	chr1_167613700_167613729	GTCGAGCCAGTGTGACCAG
sg071878	Rxrg	chr1_167613802_167613831	ACAGCACTCAGCGTCCGAG
sg112737	Rxrg	chr1_167627409_167627438	GTAGCGACAGTACTGGCAG
sg031122	Rxrg	chr1_167630962_167630991	TGTGCAAGAAGAAAGGCAG
sg112736	Rxrg	chr1_167631026_167631055	AGCCACGAAGACATGCCCG
sg031121	Rxrg	chr1_167631276_167631305	GCGTTTGGCCCACTCAACG
sg003712	Atp1a2	chr1_172276119_172276148	CTTGAGTGGGTACATCCGG
sg044978	Atp1a2	chr1_172278934_172278963	TGAGAGTGACATCATGAAG
sg085728	Atp1a2	chr1_172285952_172285981	TGGCCCCCTACCTTAGACA
sg085727	Atp1a2	chr1_172289387_172289416	GATAACTCATCCCTAACAG
sg044977	Atp1a2	chr1_172291202_172291231	GATGGTTCGTCCTCCATAG
sg003711	Atp1a2	chr1_172293331_172293360	CTGGGCCGAAAATACCAAG
sg042794	Ackr1	chr1_173332215_173332244	CCACAAGACACTAACCCAG
sg083537	Ackr1	chr1_173332459_173332488	TGAATATTGGTCAACTCCG
sg083538	Ackr1	chr1_173332555_173332584	CAGTAGCCCAGGTTGCATA
sg042793	Ackr1	chr1_173332637_173332666	ATTCTGGCAGAGTTAGCAG
sg001534	Ackr1	chr1_173332671_173332700	GCTGGGGCAAATCTGCCAG
sg001533	Ackr1	chr1_173332698_173332727	AGGTCTGAGAATCGCGAAG
sg087117	Cadm3	chr1_173341676_173341705	GCTGTTGTTACATTGTGAG
sg005080	Cadm3	chr1_173344400_173344429	TCATTCCAGGTTACCCGGG
sg005081	Cadm3	chr1_173344935_173344964	TGCAGCCCAGCTCACCTGG
sg046356	Cadm3	chr1_173345004_173345033	TGGTTATAAGTCATCATTG
sg046357	Cadm3	chr1_173345875_173345904	TGAATCCGATTATCTCGAA
sg087118	Cadm3	chr1_173346520_173346549	ACATCTGATGAAACAGTTG
sg074862	Spta1	chr1_174174416_174174445	AAGGATCGCGTTGCCGAGA
sg115714	Spta1	chr1_174184658_174184687	TTGGATCTAGTCTCCAACT
sg115715	Spta1	chr1_174192974_174193003	ATATCGCTGCTATTCGTGA
sg034118	Spta1	chr1_174192976_174193005	ATCGCTGCTATTCGTGATG
sg074861	Spta1	chr1_174199499_174199528	GATTCAAGTAATAACAGAG
sg034117	Spta1	chr1_174214113_174214142	GTACAGAACTTATAGACAG
sg012379	Fmn2	chr1_174502085_174502114	ATGCCTCCCACGAAGGCGG
sg094477	Fmn2	chr1_174502492_174502521	GTAGGGATCCAGGCGACCG
sg012378	Fmn2	chr1_174503144_174503173	CCAGGCAAAGAAACGACTG
sg053682	Fmn2	chr1_174503409_174503438	CTCGGTCCAGTCGGCTGAG
sg094476	Fmn2	chr1_174581959_174581988	TTCGATGGATTACAGCGAA
sg053683	Fmn2	chr1_174744259_174744288	ATTGACCAAGAGTCACAGG
sg109112	Pld5	chr1_175970483_175970512	AAGTACATGGTGACAGACG
sg068251	Pld5	chr1_175993840_175993869	GCAAGACTCACCGACACAA
sg027095	Pi15	chr1_17602628_17602657	AAGGGACAAAAGAATCACA
sg027096	Pi15	chr1_17602684_17602713	GCTGGCAGAGATGAGTCAG
sg108722	Pi15	chr1_17602825_17602854	ATTATCATAATCAAGTCCG
sg068252	Pld5	chr1_176044909_176044938	GACCGCCTACAACAAGGGC
sg027485	Pld5	chr1_176044913_176044942	ACATGACCGCCTACAACAA
sg109111	Pld5	chr1_176089967_176089996	AAGAGCGGTAAGTGAAACG
sg067862	Pi15	chr1_17619794_17619823	AATCTTGCAAAATCGGCTG
sg067863	Pi15	chr1_17621406_17621435	CCATGGCTTGACCAACTGG
sg108723	Pi15	chr1_17621450_17621479	CAGTCCTGAGGGTAAGGAA
sg027484	Pld5	chr1_176274758_176274787	CGCCCAGCCTGACCCGAGT
sg119940	Ush2a	chr1_188263184_188263213	TGCCAACCCACGCCACGTG
sg038367	Ush2a	chr1_188399809_188399838	CTTGCCAATGTAACCTCCA
sg079103	Ush2a	chr1_188444452_188444481	AAGCTATGAGTTATACATG
sg038368	Ush2a	chr1_188654629_188654658	GGCGCATCCCACCTCACGT
sg079104	Ush2a	chr1_188714368_188714397	CCGGAGCGTTGTTGCGAGC
sg119939	Ush2a	chr1_188759825_188759854	TTTCAATACCTGTAATCCG
sg094867	G0s2	chr1_193272595_193272624	TCTTGGTCGCGCAGACGGC
sg054073	G0s2	chr1_193272598_193272627	TGGTCGCGCAGACGGCTGG
sg012766	G0s2	chr1_193272632_193272661	GTGCTCGGCCTAGTTGAGA
sg054072	G0s2	chr1_193272653_193272682	GTGCTGGCGCTCTTCGGTG
sg094868	G0s2	chr1_193272698_193272727	GCTTCACTAGCTTCCCTCG
sg012767	G0s2	chr1_193272705_193272734	GATGGCGCAGAAGCCCCGA
sg051258	Dst	chr1_33908272_33908301	AGCAAAACGAGGAAAGCGG
sg009963	Dst	chr1_34164216_34164245	CGGAAGAAAAGCTACCACG
sg051257	Dst	chr1_34191456_34191485	TTCTGGCGATACATTCTCG
sg092041	Dst	chr1_34194126_34194155	GAAGGCGTTCTGTAAACGT
sg092040	Dst	chr1_34218370_34218399	GCCACAGTTACGAAGACCT
sg009964	Dst	chr1_34268297_34268326	CTGAAGAAAGTAACAGAGG
sg082051	1500015o10rik	chr1_43730912_43730941	AGCAGAGCCAGCCCGGCAA
sg041329	1500015o10rik	chr1_43737226_43737255	AGATGCTCCAGAAACGAGA
sg000085	1500015o10rik	chr1_43738588_43738617	GTAGCCGAGAACACAGCAA
sg082050	1500015o10rik	chr1_43738601_43738630	CAGCAAAGGAATTCCTAGG
sg000084	1500015o10rik	chr1_43738629_43738658	GCGTGCCAAACGACAGCTG
sg041330	1500015o10rik	chr1_43738686_43738715	CTCATCAAAGCCCATGTAG
sg000212	1700019d03rik	chr1_52925329_52925358	CTGGCCAGTGAAATTGTGG
sg041455	1700019d03rik	chr1_52925361_52925390	TCTGCGAATTCAAGGATCA
sg041456	1700019d03rik	chr1_52925380_52925409	GGGCACCGATCACAGCACC
sg082175	1700019d03rik	chr1_52925436_52925465	AATATAGGACACCTTCTCC
sg082176	1700019d03rik	chr1_52925485_52925514	GACAAGCTGCATGAGAGTG
sg000211	1700019d03rik	chr1_52925505_52925534	AGCTTGTCAATGTCCAATG
sg042738	Acadl	chr1_66836988_66837017	AATGTGTGCAACTCCACGG
sg083481	Acadl	chr1_66845258_66845287	GGCGATCGAGCTTCACGGT
sg001478	Acadl	chr1_66853236_66853265	CATGACAATATCTGAGTGG
sg083482	Acadl	chr1_66853264_66853293	GAGCGTACTCCAATTGCAC
sg001477	Acadl	chr1_66854662_66854691	ACATCGCAGAGAAACATGG
sg042737	Acadl	chr1_66857449_66857478	CGGAAAATGTCATGCTCCG
sg010939	Erbb4	chr1_68040124_68040153	ATTCTCTGCCACAATGGGG
sg052235	Erbb4	chr1_68040363_68040392	AGCGGTCCACCCAAGGCGG
sg010938	Erbb4	chr1_68254619_68254648	TAGAGCCCTTAACTCCCAG
sg093023	Erbb4	chr1_68328228_68328257	TGCTGATCCTCAAACAACA
sg052234	Erbb4	chr1_68349349_68349378	TGGCAGCAGTCACTAACGT
sg093024	Erbb4	chr1_68740370_68740399	AAGAAATGTACCCGCAGGA
sg112371	Rpl37a	chr1_72711668_72711697	CAGGCTAAACGCACCAAGA
sg030755	Rpl37a	chr1_72711709_72711738	CCGGAGGGAGGCACCATAG
sg071513	Rpl37a	chr1_72711779_72711808	ACTTGCTCCTTCTGTGGCA
sg030754	Rpl37a	chr1_72711780_72711809	CGACTTGCCTTGCCACAGA
sg112372	Rpl37a	chr1_72712205_72712234	AACACTCACTTGTAGGTCC
sg071514	Rpl37a	chr1_72713497_72713526	TTCACTGTGACTGCAGAGG
sg121888	Zfp142	chr1_74567126_74567155	AGCCCAGCGGAAAGCACGG
sg121887	Zfp142	chr1_74570677_74570706	GAGGCTCCATCAAAAACGG
sg081065	Zfp142	chr1_74570965_74570994	TGGCCAGAAAAGAAAGCGT
sg040339	Zfp142	chr1_74572041_74572070	CTGCCAGAGACAAATGAGG
sg081066	Zfp142	chr1_74573539_74573568	CACATGCGGAAACATGCAG
sg040340	Zfp142	chr1_74576521_74576550	CAAGCGCTGCTTTAAGAAG
sg050575	Des	chr1_75360472_75360501	GAGCCCAGAGAGAAGCCCG
sg091356	Des	chr1_75360562_75360591	CGCGACACCTGGTACACGC
sg050574	Des	chr1_75360864_75360893	GTCGCCGAGCTCTACGAGG
sg009282	Des	chr1_75360959_75360988	CCTGATAGACGACCTGCAG
sg009281	Des	chr1_75362354_75362383	AGAATCGAATCCCTCAACG
sg091357	Des	chr1_75362670_75362699	GAGATGTTCTTAGCCGCGA
sg073308	Slc19a3	chr1_83013943_83013972	TACTTCGCTGTCATTGCGG
sg114163	Slc19a3	chr1_83022368_83022397	TAGATGGAAGAATCTTGGG
sg032558	Slc19a3	chr1_83022445_83022474	TGTGGCAAAAGCCCACCAG
sg073307	Slc19a3	chr1_83022570_83022599	GCCAATTCAAAGAATCTAG
sg114162	Slc19a3	chr1_83022837_83022866	TGTCGGAGTATCACACTGG
sg032557	Slc19a3	chr1_83023004_83023033	AACAGGTAGCTAGTGGCGA
sg033958	Sphkap	chr1_83275982_83276011	CACCAGCAAAGGACACAGG
sg033957	Sphkap	chr1_83277099_83277128	AGAAGGAAAACTCAAGCGC
sg074703	Sphkap	chr1_83277462_83277491	AATTGACAACAGCAAGCGA
sg115556	Sphkap	chr1_83278291_83278320	GGCTTATGTGAAAAAGAAG
sg115555	Sphkap	chr1_83278694_83278723	TAGCTCGTTCCATGAACGA
sg074702	Sphkap	chr1_83279242_83279271	GAAGGATGGGATTACCACA
sg064081	Nmur1	chr1_86387399_86387428	AGGATGTTGCTCCAAGTGG
sg022749	Nmur1	chr1_86387462_86387491	GCACACTGATGGTGACCAT
sg104946	Nmur1	chr1_86387571_86387600	ACTAACTGTGCCCTGCCGG
sg064080	Nmur1	chr1_86387586_86387615	GGGCACAGTTAGTTGACTG
sg022748	Nmur1	chr1_86387846_86387875	GCATCTCATAAAGCTCCAG
sg104945	Nmur1	chr1_86388006_86388035	CAGGTACGTGACACAGATG
sg089619	Col6a3	chr1_90779098_90779127	GTTGGATTTCCTTAGCCGG
sg007560	Col6a3	chr1_90802326_90802355	CGCCTTCGTGATCACCGGA
sg048848	Col6a3	chr1_90803831_90803860	CCAAGTCATAAGCTCATCG
sg089618	Col6a3	chr1_90810164_90810193	GTGATCCAGCTTAATCGTG
sg048849	Col6a3	chr1_90813505_90813534	CATGCCAATCACTTCACGG
sg007561	Col6a3	chr1_90828450_90828479	GATGTCAAAAACGGTGCGG
sg105377	Nts	chr10_102484875_102484904	GTGTTGAAAGGCCCTGCTG
sg105376	Nts	chr10_102484940_102484969	TAAAACCATCCAGAACAAG
sg064512	Nts	chr10_102485003_102485032	AACGTGAACAGCCCGGCCG
sg023180	Nts	chr10_102485038_102485067	AGGCTGCAAACATTTAGCA
sg023181	Nts	chr10_102487923_102487952	ACAAACATGCATACATCCA
sg064511	Nts	chr10_102487949_102487978	GTCAATAGATCTGCCTCCA
sg069876	Ptprq	chr10_107608143_107608172	TGTGTGGAAATCCAGCTGG
sg110736	Ptprq	chr10_107643023_107643052	TTAAAGTCAAATTCTGGGG
sg029113	Ptprq	chr10_107667376_107667405	AAGAGAAGTAATAGCCACG
sg029114	Ptprq	chr10_107699671_107699700	TTTGATTTACAGATCGTGG
sg110735	Ptprq	chr10_107705571_107705600	ATGCGTAAACACAAACCGG
sg069875	Ptprq	chr10_107712036_107712065	AAAGTGGTTAACCTCACAG
sg077899	Trhde	chr10_114401482_114401511	GCTCGTGAGAAAGAAGCAG
sg118737	Trhde	chr10_114448265_114448294	GGTCCAGTAATTTATCCAG
sg037160	Trhde	chr10_114788190_114788219	TGAAAACTGAGTAACACCA
sg037161	Trhde	chr10_114800745_114800774	GGCGTGCAGTACCACGTAG
sg077898	Trhde	chr10_114801055_114801084	CGATGCCTGGCACCGACGG
sg118736	Trhde	chr10_114801088_114801117	GCTTGCGATTCGACGAGTG
sg037554	Tspan8	chr10_115833207_115833236	GATATTCACAGCAATGAAG
sg119129	Tspan8	chr10_115833297_115833326	TACCAAGAGAAGCATGCAC
sg037555	Tspan8	chr10_115835116_115835145	TGATTCTGCAAGTGGCAGC
sg119128	Tspan8	chr10_115835143_115835172	CGTACCTCAGGTTTGAAAG
sg078291	Tspan8	chr10_115835338_115835367	GAGGCAAAAGACTTCCAGA
sg078292	Tspan8	chr10_115839979_115840008	GGGAGTTCCGTTTACCCAA
sg069847	Ptprb	chr10_116315160_116315189	ATCGTTCAAGACACAAACG
sg069848	Ptprb	chr10_116317508_116317537	ATTGAGTTTCAGTAACAGG
sg029085	Ptprb	chr10_116319552_116319581	TGTTGAGAGCGGAAATCTG
sg029086	Ptprb	chr10_116338684_116338713	TAGTGGTCAAAGTCTCCAG
sg110707	Ptprb	chr10_116339494_116339523	GGGGATGTTGATCAGTACG
sg110708	Ptprb	chr10_116339586_116339615	GTTCACGGCGCTCACGCCG
sg080449	Wif1	chr10_121034978_121035007	CATTCTGATTGTCTCGGAG
sg039722	Wif1	chr10_121075273_121075302	GCCATGATGCCTTTATCCA
sg121272	Wif1	chr10_121082145_121082174	TGTCTCGGCAAACAAGACG
sg039721	Wif1	chr10_121084913_121084942	GACCACCGTTCATACATCG
sg121273	Wif1	chr10_121084917_121084946	TACCCCGATGTATGAACGG
sg080450	Wif1	chr10_121084963_121084992	GACACCGTAGAATCCAGGG
sg010937	Erbb3	chr10_128570937_128570966	AACCAGAGCAACCTTGGGG
sg052232	Erbb3	chr10_128572564_128572593	TAGGGTATGTATTACCTCG
sg052233	Erbb3	chr10_128578439_128578468	CTGGACCAGACTTCTGCGG
sg093021	Erbb3	chr10_128579010_128579039	CCAACCTGACGACCATCGG
sg093022	Erbb3	chr10_128581816_128581845	GGACTCTAGCAATATCGAT
sg010936	Erbb3	chr10_128585113_128585142	CCCTTACCTAACCTCCGAG
sg111522	Rdh5	chr10_128913873_128913902	TGTGACCCAGAACTAACGA
sg029902	Rdh5	chr10_128914263_128914292	TGGAGACTTGTACTCCGAA
sg070663	Rdh5	chr10_128917921_128917950	GCATAGCAGCCAATGGCGG
sg111521	Rdh5	chr10_128918063_128918092	AATCATCCTGTGTTAGCCA
sg070662	Rdh5	chr10_128918254_128918283	AGTGGGTGAAGACACGTGT
sg029903	Rdh5	chr10_128918531_128918560	GCAAGGCACCCAGAAGCAG
sg058800	Itga7	chr10_128939080_128939109	AGCAGGCAAACCGCACCGG
sg017461	Itga7	chr10_128943182_128943211	TGTATGTGTACATGAACCA
sg099665	Itga7	chr10_128944405_128944434	TTAGATTATATGTTAGATG
sg099664	Itga7	chr10_128945435_128945464	GTTCGGAGACCATATGACA
sg058799	Itga7	chr10_128946809_128946838	CCACTCAATGCGAACAGGG
sg017462	Itga7	chr10_128953522_128953551	AAAGGTGCTGTTCCAGAGG
sg032018	Sf3b5	chr10_13008664_13008693	CAGTCCAAGTACATCGGCA
sg113627	Sf3b5	chr10_13008688_13008717	CACGCCGACACCACCAAGT
sg032017	Sf3b5	chr10_13008723_13008752	GTAGGAGCAGTAGGAGTCG
sg113628	Sf3b5	chr10_13008759_13008788	AATGGCGAAGTAGTTGAGG
sg072771	Sf3b5	chr10_13008776_13008805	TTGCTCTCGTTCTCGGCAA
sg072772	Sf3b5	chr10_13008853_13008882	CCGCCCGCGGACAAGCCCG
sg001108	9330159f19rik	chr10_29218160_29218189	CACGGACCTCCATGAGCAG
sg001107	9330159f19rik	chr10_29221878_29221907	CCCCCAAATCACCTCAACT
sg083109	9330159f19rik	chr10_29224461_29224490	GAGCTGGGGAGATTTCGAG
sg042365	9330159f19rik	chr10_29224519_29224548	GGAACATTTATACCACAGG
sg083108	9330159f19rik	chr10_29224579_29224608	CAACGGAGACTGCCTCAAG
sg042366	9330159f19rik	chr10_29224635_29224664	GGTGTCCAAGAGGAAAACA
sg118710	Trdn	chr10_33139209_33139238	CATCGCTCTGATTATCACA
sg077873	Trdn	chr10_33332444_33332473	AAATGAGAAAACCTACAGA
sg037135	Trdn	chr10_33333221_33333250	CTTTCAACAGAACAACCCA
sg037134	Trdn	chr10_33333222_33333251	TTTCAACAGAACAACCCAA
sg118711	Trdn	chr10_33343071_33343100	GCAGAAGCTGAACAAGCCA
sg077872	Trdn	chr10_33364001_33364030	AAGCCAAGACAGTCGAGCA
sg011078	Esr1	chr10_4712530_4712559	ACTGTGTTCAACTACCCCG
sg093163	Esr1	chr10_4746714_4746743	GAGGCATAGTCATTGCACA
sg052375	Esr1	chr10_4783893_4783922	CACCATTGACAAGAACCGG
sg052374	Esr1	chr10_4856857_4856886	GCATACGGAAAGACCGCCG
sg093164	Esr1	chr10_4857060_4857089	ATTCAGAATAGATCATGGG
sg011079	Esr1	chr10_4966792_4966821	ATACACCTCCATCAACCAG
sg071396	Ros1	chr10_52099989_52100018	AAGGACAAACTAAAAGTGG
sg112253	Ros1	chr10_52118313_52118342	GGTTGTAGAACATGTTGCG
sg030636	Ros1	chr10_52123389_52123418	GAGATATGAGATACGGACA
sg071395	Ros1	chr10_52128454_52128483	TCACTCCTTATACCTACTG
sg112254	Ros1	chr10_52154844_52154873	CTGCCAGGACATCCACAGG
sg030637	Ros1	chr10_52170039_52170068	TCATGGTGTGACATTACGC
sg116471	Syne1	chr10_5342239_5342268	GAGACAAACAAGGAGACGG
sg034884	Syne1	chr10_5353948_5353977	TGCTCCCCACTGTTGTACG
sg075626	Syne1	chr10_5360732_5360761	GATCGCTATGGTGATACCG
sg075627	Syne1	chr10_5360815_5360844	AGGTTCCTCCACTGGGCAG
sg034883	Syne1	chr10_5367520_5367549	CTGGATCATCAAGTATGGG
sg116470	Syne1	chr10_5436773_5436802	GTGAAGCGTATTCATGCTG
sg011299	Fabp7	chr10_57785511_57785540	ACGTTTCCCACTTGCCTAG
sg093385	Fabp7	chr10_57785550_57785579	CTGTGATTATCAGTCAGGA
sg093386	Fabp7	chr10_57785553_57785582	TGATTATCAGTCAGGAAGG
sg052596	Fabp7	chr10_57785581_57785610	CTTGAATGTGCATTGTGTC
sg011300	Fabp7	chr10_57786295_57786324	TTCATGTGCAGAAGTGGGA
sg052597	Fabp7	chr10_57786331_57786360	GTACCAGAGAAATTAAGGA
sg084668	Ank3	chr10_69874867_69874896	TCTATTCAAGCCGTAACCG
sg084667	Ank3	chr10_69892327_69892356	TATACACCACTGCACATCG
sg002653	Ank3	chr10_69899019_69899048	AACCACCGAGATGTAACCA
sg043919	Ank3	chr10_69926108_69926137	CCAGGAATTCCTTAAGCAG
sg002654	Ank3	chr10_69956036_69956065	TTTATGTCTCTTTACCAGG
sg043918	Ank3	chr10_69958911_69958940	AGGGATTTCCACAATGACG
sg071919	S100b	chr10_76257056_76257085	TGGTGGAAGACATCAATGA
sg031161	S100b	chr10_76257072_76257101	CTCTCGCCCGGAGTACTGG
sg112776	S100b	chr10_76257151_76257180	GAGCTCTCTCACTTCCTGG
sg112777	S100b	chr10_76259927_76259956	GAAATCAAGGAGCAGGAAG
sg071918	S100b	chr10_76259942_76259971	GAAGTGGTGGACAAAGTGA
sg031162	S100b	chr10_76260027_76260056	AAGAACTCATGGCAGGCCG
sg088714	Cfd	chr10_79891464_79891493	CCCGAGGCCGGATTCTGGG
sg006663	Cfd	chr10_79891536_79891565	ACGGCACACACGTGTGCGG
sg047947	Cfd	chr10_79891753_79891782	CCCTGAACCCTACAAGCGA
sg006662	Cfd	chr10_79891998_79892027	CTCACGTGGGGACCCAACG
sg088713	Cfd	chr10_79892063_79892092	CCCGGCACGCTCTGCGACG
sg047948	Cfd	chr10_79892122_79892151	TGACACTCTGAGTTGATGC
sg115992	Stab2	chr10_86878932_86878961	AACTTTACCAGAATAACGG
sg034403	Stab2	chr10_86890757_86890786	CCTGCCGCACATTTGCACG
sg115991	Stab2	chr10_86933385_86933414	ATGCATCCAAGCTAGCACG
sg075147	Stab2	chr10_86947261_86947290	CAGATTCTGGCAAACAACG
sg075148	Stab2	chr10_86955099_86955128	AATAGTGCAAATTATCCAG
sg034404	Stab2	chr10_86969325_86969354	GGTAGGAACAACTTGCGTG
sg016844	Igf1	chr10_87861290_87861319	CGAGGTGAACACAAAACTG
sg058177	Igf1	chr10_87864811_87864840	GGACCAGAGACCCTTTGCG
sg016843	Igf1	chr10_87864862_87864891	CACTGAAGTAAAAGCCCCT
sg099042	Igf1	chr10_87913617_87913646	TGCTGGAGCCATAGCCTGT
sg099043	Igf1	chr10_87913631_87913660	CTATGGCTCCAGCATTCGG
sg058178	Igf1	chr10_87915601_87915630	AAGTGCCGTATCCCAGAGG
sg103916	Mybpc1	chr10_88525051_88525080	GAAGACTTCAATTTCACAG
sg021713	Mybpc1	chr10_88542386_88542415	GCAAAGATTCGGACCTCGT
sg021714	Mybpc1	chr10_88551390_88551419	GTCTGAAGGTTGTTCACAA
sg063047	Mybpc1	chr10_88553278_88553307	ACTCAGCCATGACAACCGG
sg103915	Mybpc1	chr10_88553324_88553353	CACACGTTGATCATAGAAG
sg063046	Mybpc1	chr10_88573408_88573437	AAACCGGATCGGTGAAAGT
sg038454	Usp44	chr10_93845807_93845836	TACTTCCCACAGGCGACGT
sg079189	Usp44	chr10_93846054_93846083	GTCGAGTAAGGAGTAAACA
sg120024	Usp44	chr10_93846223_93846252	AGAATGGTAGCAAAACGAG
sg120023	Usp44	chr10_93846298_93846327	AGCGTAAACTCTTCCGCGG
sg038453	Usp44	chr10_93846410_93846439	TCTTCCGAAGTAGGTAGCG
sg079190	Usp44	chr10_93846459_93846488	TGACTCCTTAATCAAACGA
sg112844	Samd5	chr10_9674622_9674651	GCACTCGCGGGGACCCCCG
sg031229	Samd5	chr10_9674689_9674718	GGGGCACCGCTTCTACCAG
sg031230	Samd5	chr10_9674707_9674736	GAACCGCAGCCCGTGCCAC
sg112845	Samd5	chr10_9674729_9674758	CGGTTCAAGGGTGAAGTAG
sg071986	Samd5	chr10_9674785_9674814	CACCGCCGGCGCATCCTAG
sg071987	Samd5	chr10_9674896_9674925	CGAAGGACTCAGCGTACTG
sg059809	Krt14	chr11_100204717_100204746	CTCAGGTCCACACCAGGGG
sg100674	Krt14	chr11_100204935_100204964	CCTAGCTCTTACCTCCTCG
sg018469	Krt14	chr11_100205671_100205700	ACATTGGCATTGTCCACGG
sg059808	Krt14	chr11_100206998_100207027	GAGGCCAACACTGAACTGG
sg100675	Krt14	chr11_100207312_100207341	GTAACCGACATGCCCCCGT
sg018470	Krt14	chr11_100207318_100207347	GGGCTCCCAGCACCTACGG
sg044115	Aoc3	chr11_101331567_101331596	CAATGACTACAGCCCCCCG
sg084865	Aoc3	chr11_101331811_101331840	CCCAAACAATGGTACAGGT
sg002850	Aoc3	chr11_101332073_101332102	TCAATGTCGACCTGCTACG
sg084866	Aoc3	chr11_101332243_101332272	CCAGGGCCTCCCACTCCGG
sg002851	Aoc3	chr11_101335777_101335806	ACCGGAGTACCAGATGCAG
sg044116	Aoc3	chr11_101337505_101337534	GAGTCAGCAGAATGAAAGG
sg045945	Brca1	chr11_101523339_101523368	GAGGATAATGACCAAGAAG
sg086704	Brca1	chr11_101523992_101524021	ATCTTGAGCAATCTATGAG
sg045944	Brca1	chr11_101524821_101524850	TAAGCGCGTGTCTCAAGGG
sg086703	Brca1	chr11_101525775_101525804	AGTACATCCCTTCAACCTG
sg004672	Brca1	chr11_101526103_101526132	TGACAGCGCATCTGCCAGG
sg004671	Brca1	chr11_101526194_101526223	GTTATCCAAGGAACATCGG
sg102692	Meox1	chr11_101879411_101879440	CAGACAACCAGGAGAACGG
sg061822	Meox1	chr11_101893572_101893601	GGGACGATCGCCAATGAGA
sg102693	Meox1	chr11_101893630_101893659	TGTGCCATCCACCAGGCCG
sg061823	Meox1	chr11_101893717_101893746	GATAGGGAAGTGCCAGTCA
sg020484	Meox1	chr11_101893718_101893747	ATAGGGAAGTGCCAGTCAG
sg020485	Meox1	chr11_101893889_101893918	GGATAATGGGACAGCCCTG
sg047286	Cd300lg	chr11_102043022_102043051	TCCACGTAGGTACACCGCA
sg088051	Cd300lg	chr11_102043133_102043162	AGGACCAGGAGGTGACTCG
sg006004	Cd300lg	chr11_102043257_102043286	AACCTCAAAAGACTCATCG
sg088052	Cd300lg	chr11_102046928_102046957	GTTCCTGTAGACCAGGCTG
sg006005	Cd300lg	chr11_102054090_102054119	CAGTCTACAGAGGAGGAAG
sg047287	Cd300lg	chr11_102054159_102054188	CCCTTGCAGATGTCTGCGG
sg054467	Gfap	chr11_102891152_102891181	TGGTTCAGTCCCTTAGAGG
sg013160	Gfap	chr11_102891486_102891515	AAAGCACCAAAGAAGGGGA
sg095263	Gfap	chr11_102894421_102894450	GAGATTCGCACTCAATACG
sg095264	Gfap	chr11_102895465_102895494	TTAAGGAAGATCTATGAGG
sg013159	Gfap	chr11_102895779_102895808	CCAAGATGAAACCAACCTG
sg054466	Gfap	chr11_102896871_102896900	CTCGATGTAGCTAGCAAAG
sg072237	Scn4a	chr11_106319797_106319826	AAAGAGAAAGACTCAACAG
sg031481	Scn4a	chr11_106324564_106324593	GAGATGTCGAATCTCTCGG
sg113092	Scn4a	chr11_106326843_106326872	GGACATCTACATTGAACAG
sg031482	Scn4a	chr11_106337158_106337187	CTGTTGGAAATATTCGTAG
sg113093	Scn4a	chr11_106339264_106339293	GGGGTCCATGACAATCAGG
sg072236	Scn4a	chr11_106345536_106345565	GTATCATTACCATACCACG
sg042574	Abca8b	chr11_109949790_109949819	GCAAGGGGAAAAAAAACAG
sg083318	Abca8b	chr11_109953519_109953548	CAGATGACCCATCCTACAA
sg083317	Abca8b	chr11_109957102_109957131	CAAACCTGTGCGATCGCAA
sg001314	Abca8b	chr11_109967071_109967100	TTGCTCAAAACCTAAGTGG
sg042573	Abca8b	chr11_109967072_109967101	CTTGCTCAAAACCTAAGTG
sg001313	Abca8b	chr11_109974989_109975018	CATAGATAATCCATAAAGG
sg042575	Abca9	chr11_110131782_110131811	CTGCCCATCGCAATGTAAG
sg001315	Abca9	chr11_110138287_110138316	GGGCGCTTACAAAGCGATG
sg083320	Abca9	chr11_110144827_110144856	TGGGTTGGATCCACTCTCG
sg001316	Abca9	chr11_110145121_110145150	TTGCTCAGAATTTAAGTGG
sg083319	Abca9	chr11_110148883_110148912	AGGTAAGTACGGACATCAA
sg042576	Abca9	chr11_110158322_110158351	CTCCTTGGGCAATAAAAGG
sg042568	Abca6	chr11_110196695_110196724	AAGGAAGCAAATTGACCAG
sg001307	Abca6	chr11_110218961_110218990	AGGGATCGAGTCCTACAGT
sg042567	Abca6	chr11_110219256_110219285	TAGCCGAACATTTAAGCGA
sg083311	Abca6	chr11_110232136_110232165	AAAACAGCGAATAGAAACA
sg083312	Abca6	chr11_110241555_110241584	AAACAGCGTAAATATGACC
sg001308	Abca6	chr11_110250409_110250438	TCTGCTCAAGAAATGGCGG
sg100023	Kcnj16	chr11_111024757_111024786	ATGGAGCCAAATATCAACC
sg059157	Kcnj16	chr11_111024895_111024924	CGGTAACCGTATCCAATGG
sg017818	Kcnj16	chr11_111024898_111024927	CAGCGGTAACCGTATCCAA
sg059156	Kcnj16	chr11_111025125_111025154	GACTTCCGACCAAACCATG
sg100022	Kcnj16	chr11_111025191_111025220	AGTGAAGGGAGGATGACGA
sg017819	Kcnj16	chr11_111025513_111025542	TGTTTGGCACTGCAAAAGG
sg028956	Ptchd3	chr11_121830416_121830445	TAGGGCCCGCCTCATCAAG
sg069719	Ptchd3	chr11_121830433_121830462	CGGCCCGGTGGTCCAGCTA
sg110577	Ptchd3	chr11_121830530_121830559	GTTGGAAGCCCCGCGACAG
sg110578	Ptchd3	chr11_121830555_121830584	AACGCTTTGGCGCCACAGT
sg069718	Ptchd3	chr11_121831142_121831171	CTGTACTACCTCAAGACGG
sg028955	Ptchd3	chr11_121832102_121832131	ATGTATGCCAAGTGAAACA
sg092508	Egfr	chr11_16868199_16868228	CCAGACAGTCACTCTCTCG
sg010425	Egfr	chr11_16871019_16871048	GGGCCTGACTACTACGAAG
sg051720	Egfr	chr11_16872899_16872928	AGAACCTAGAAATAATACG
sg010426	Egfr	chr11_16878201_16878230	CCTGCCAGAATGTGAGCAG
sg092507	Egfr	chr11_16889968_16889997	ATGAATAGGCCAATCCCAA
sg051721	Egfr	chr11_16896928_16896957	CAGACAGATGCCCAGGAGG
sg068495	Pnpt1	chr11_29133896_29133925	CCAACGGCATGAATTGGGA
sg068496	Pnpt1	chr11_29137255_29137284	GGGATATCTGATAAGGAGA
sg109355	Pnpt1	chr11_29138186_29138215	ATGTGTCGTTAACCCAACA
sg027731	Pnpt1	chr11_29138461_29138490	TGCCATGCTATCAAAGTTG
sg109356	Pnpt1	chr11_29141216_29141245	TCTGTAGAAAAATTTCCAG
sg027730	Pnpt1	chr11_29141672_29141701	AAGAGATCTGACTTCACTT
sg056986	Hba-A1	chr11_32283732_32283761	CAACATCAAGGCTGCCTGG
sg097838	Hba-A1	chr11_32283759_32283788	AGCTCCATATTCAGCACCA
sg097839	Hba-A1	chr11_32283913_32283942	GGGAAGCTAGCAAACATCC
sg056989	Hba-A2	chr11_32283961_32283990	CTCACTTTGATGTAAGCCA
sg015660	Hba-A1	chr11_32283971_32284000	CTTGACCTGGGCAGAGCCG
sg015662	Hba-A2	chr11_32283982_32284011	TTGCCGTGACCCTTGACCT
sg015659	Hba-A1	chr11_32284060_32284089	AGGTCGCTCAGAGCAGACA
sg056987	Hba-A1	chr11_32284264_32284293	CAAGGTCACCAGCAGGCAG
sg015661	Hba-A2	chr11_32296557_32296586	TGGCCACCAATCTTCCCCC
sg097840	Hba-A2	chr11_32296729_32296758	GGAAGCTAGCAAACATCCT
sg097841	Hba-A2	chr11_32296810_32296839	GTCAAGGGTCACGGCAAGA
sg056988	Hba-A2	chr11_32296857_32296886	GGCACCGGGCAGGTCATCG
sg012840	Gabrp	chr11_33554977_33555006	TCTCGCAGGAACTGAATCG
sg054146	Gabrp	chr11_33563892_33563921	GATCTGTCTAAATACCCCA
sg094941	Gabrp	chr11_33567376_33567405	GCAGCGTTGGACAGACCCA
sg054147	Gabrp	chr11_33567388_33567417	GTCTGTCCAACGCTGCCGG
sg094942	Gabrp	chr11_33572453_33572482	CAGGGGAACCAGGTCAATG
sg012841	Gabrp	chr11_33572469_33572498	TTCCAGGACGTGCATCCAG
sg117185	Tenm2	chr11_36023488_36023517	TGGTCATTGGCTTCCACGG
sg076344	Tenm2	chr11_36039881_36039910	TTGGCGTACATCACCCGCA
sg076345	Tenm2	chr11_36047322_36047351	GAGATCTGCCTCTTAGCCG
sg117184	Tenm2	chr11_36139596_36139625	GGCAAATGTGAATGCCGAG
sg035606	Tenm2	chr11_36141597_36141626	GTTGAGACCACCCCAGCCG
sg035605	Tenm2	chr11_36221425_36221454	TTACCAGGAAACGATGATG
sg004823	Btnl9	chr11_49169319_49169348	GGACGCCTATCCTCCGGGG
sg046096	Btnl9	chr11_49169470_49169499	ACAGGCGCCCAGGAACCAG
sg046095	Btnl9	chr11_49178788_49178817	AGACATCCGTGATTGTCCG
sg086855	Btnl9	chr11_49180603_49180632	AAAGTGCTTCCCTCCGACG
sg004822	Btnl9	chr11_49180734_49180763	TGGTACAGGTACACCACGT
sg086856	Btnl9	chr11_49180847_49180876	GGCCAAAATGGACTCCTCA
sg012371	Flt4	chr11_49625239_49625268	CTCGAGTGGACCTGGCCAG
sg053674	Flt4	chr11_49632047_49632076	GCTGTCCAGACTCTCGATG
sg094468	Flt4	chr11_49634185_49634214	CTAGAGGCCAACCTAGAGG
sg012370	Flt4	chr11_49634236_49634265	AGTTTGAATATCCCCCGAG
sg053675	Flt4	chr11_49642217_49642246	TGTACCCCAGGGTATGGAG
sg094469	Flt4	chr11_49650987_49651016	TATAACAACGAGTATGGGG
sg072199	Scgb3a1	chr11_49663664_49663693	CAGAGCACTAGAAAGGTGG
sg031443	Scgb3a1	chr11_49663667_49663696	ACACAGAGCACTAGAAAGG
sg113055	Scgb3a1	chr11_49664048_49664077	GATGGGTGGCATCAATCCA
sg031444	Scgb3a1	chr11_49664398_49664427	AAGCCTGCGGTAGAACCCG
sg072198	Scgb3a1	chr11_49664475_49664504	AAGCCACTTGGCCATCCTG
sg113054	Scgb3a1	chr11_49664501_49664530	TCCAATGGGATGCCCATGC
sg070404	Rasgef1c	chr11_49957126_49957155	ATGGAGCTCCGTCCAGGAG
sg029643	Rasgef1c	chr11_49957128_49957157	GGATGGAGCTCCGTCCAGG
sg070403	Rasgef1c	chr11_49957198_49957227	GCCGATTACTATCCCGAGG
sg029642	Rasgef1c	chr11_49958693_49958722	GACACCTGACAGACGTGGT
sg111262	Rasgef1c	chr11_49967364_49967393	CTGTTGAACCACTTCACGT
sg111263	Rasgef1c	chr11_49978444_49978473	GAGCCAGACAGAAAAGGAG
sg015044	Gpx3	chr11_54907128_54907157	GGTACCACTCATACCGCCA
sg015045	Gpx3	chr11_54907171_54907200	GCCCTCACCATCGATGGGG
sg097221	Gpx3	chr11_54907238_54907267	TCAACGTAGCCAGCTACTG
sg097220	Gpx3	chr11_54908547_54908576	TGCACTACAAGAAGAACTT
sg056370	Gpx3	chr11_54909085_54909114	GAGAAAGGAGATGTGAACG
sg056371	Gpx3	chr11_54909606_54909635	CATCCTGTCTTACATGAGG
sg011864	Fat2	chr11_55253620_55253649	TGGACCTAGCTCCAAACAG
sg053166	Fat2	chr11_55281994_55282023	TACTCAGTAGACTCGACCG
sg093960	Fat2	chr11_55283097_55283126	TCAACTAAGACTTCCACTG
sg011863	Fat2	chr11_55292015_55292044	TGTCCGGCTACACATCGAG
sg053167	Fat2	chr11_55309557_55309586	CAGTACATACTCAAGGCAG
sg093961	Fat2	chr11_55311088_55311117	GACCCTCACCAATGCTACG
sg097277	Gria1	chr11_57015233_57015262	TGTTCACAATATCGATCTG
sg021311	Mrps24	chr11_5704658_5704687	GCCCATCATAAACTTTCGA
sg062648	Mrps24	chr11_5707307_5707336	CATCGCACACCGAAAGGGC
sg062647	Mrps24	chr11_5707323_5707352	CGGTGTGCGATGTAGTGCG
sg021312	Mrps24	chr11_5707393_5707422	CTTCGCTCCTAGAATCGGG
sg103515	Mrps24	chr11_5707484_5707513	ACCTTGGCGCAGACCGCGG
sg103516	Mrps24	chr11_5707630_5707659	CCTAGCCCGCGCACCGACG
sg056426	Gria1	chr11_57189714_57189743	GTCAACATTCTAACAACCA
sg056427	Gria1	chr11_57189764_57189793	CCTGGAGAAGAAAAAGGAG
sg015100	Gria1	chr11_57228952_57228981	GTTTAACGAGAAAGGGCGC
sg097276	Gria1	chr11_57238056_57238085	GTCGCTGACAATCTCAAGT
sg015101	Gria1	chr11_57309789_57309818	GTTAAAACTGAACGAGCAG
sg105632	Obscn	chr11_59051756_59051785	CTGGGCCTGCAGTTCCCGG
sg064767	Obscn	chr11_59069935_59069964	CGGCAGCAAAACTTAGCAG
sg064766	Obscn	chr11_59073343_59073372	AAGGCAAACCGGTTCACGG
sg105631	Obscn	chr11_59078378_59078407	TTGCCATGGAAAAACACCG
sg023437	Obscn	chr11_59103487_59103516	CACAGCGAAGTGAAGGCAG
sg023436	Obscn	chr11_59132557_59132586	ATGCCGGGTGCGGTCACAA
sg084405	Aldh3a1	chr11_61213453_61213482	GAATGGACCTCCTACTACG
sg043656	Aldh3a1	chr11_61213456_61213485	TGGACCTCCTACTACGAGG
sg043657	Aldh3a1	chr11_61214198_61214227	TGTGATCACTCACTTCCGA
sg084406	Aldh3a1	chr11_61214553_61214582	TGTACCCAGTGATCAAAGG
sg002394	Aldh3a1	chr11_61214707_61214736	GTCCTTGTCTACGTAACAA
sg002395	Aldh3a1	chr11_61217678_61217707	TCGCAGAGACATCAAGCGG
sg102807	Mfap4	chr11_61486073_61486102	GTGATGATATCTACGCCCA
sg102808	Mfap4	chr11_61486128_61486157	GACGGGCACCGGCACACTG
sg061936	Mfap4	chr11_61486156_61486185	TTCTGCGACATGACAACTG
sg061937	Mfap4	chr11_61487088_61487117	CTTCTGCTTCAGTGTCAGG
sg020599	Mfap4	chr11_61487153_61487182	AAGTCAATGTACTTGGCAT
sg020598	Mfap4	chr11_61487220_61487249	CTCGAAGCCAGCCACGTAG
sg063501	Ncor1	chr11_62334133_62334162	AAGGGCCCCCAGAAGGCAG
sg104370	Ncor1	chr11_62343019_62343048	ACCAGAACACCATATCCAG
sg063500	Ncor1	chr11_62343250_62343279	GGCCTAGCAAACTACCCCG
sg104369	Ncor1	chr11_62345284_62345313	TATGCCGAGCATTACCCAG
sg022168	Ncor1	chr11_62373283_62373312	CCTACCAAAGCCGACTCCG
sg022167	Ncor1	chr11_62376733_62376762	GCTTCACGGAAACCCCGTG
sg102191	Map2k4	chr11_65709924_65709953	ACTTGAAAATTATTCACAG
sg061321	Map2k4	chr11_65712241_65712270	TTGTAAAACTTATCGAACG
sg019982	Map2k4	chr11_65719578_65719607	CAGAGAATTCGGTCAACTG
sg019983	Map2k4	chr11_65735203_65735232	AATGGTCCACAAACCAAGT
sg102192	Map2k4	chr11_65756314_65756343	GTGCTGTCGATTTGACAGG
sg061322	Map2k4	chr11_65788144_65788173	CCAGCTTCTGGCCACCCGG
sg091675	Dnah9	chr11_66029363_66029392	TGGCGATATAGACCCGATG
sg050892	Dnah9	chr11_66081302_66081331	GCTCAGAAAACCCCAAATG
sg050893	Dnah9	chr11_66094063_66094092	AGTGGCCCTACTCCGCCAG
sg091674	Dnah9	chr11_66095229_66095258	ACCGTGTTTAAGCAACTGG
sg009599	Dnah9	chr11_66108513_66108542	GGGTGGAAAACTAATTCTG
sg009600	Dnah9	chr11_66168175_66168204	CCTTGGCGCGAGCTCGGCT
sg063086	Myh1	chr11_67202477_67202506	CTGCCAGTGTATAACGCAG
sg103956	Myh1	chr11_67202513_67202542	AGAGGCAAAAAGCGCCAGG
sg021754	Myh1	chr11_67205778_67205807	AAAACATGACTTACATCTG
sg021753	Myh1	chr11_67211155_67211184	GTTGGCCCAGCTTATAACC
sg063087	Myh1	chr11_67211485_67211514	GAAAACCTTGCAAAGGCGG
sg103955	Myh1	chr11_67215268_67215297	GACCTCGCTAGTAACATGG
sg118950	Trp53	chr11_69587371_69587400	ACAGATCGTCCATGCAGTG
sg078114	Trp53	chr11_69587524_69587553	AAGGGACAAAAGATGACAG
sg078113	Trp53	chr11_69588480_69588509	AAGTCACAGCACATGACGG
sg037376	Trp53	chr11_69588630_69588659	CCACCCGGATAAGATGCTG
sg118951	Trp53	chr11_69588698_69588727	ATAAGGTACCACCACGCTG
sg037377	Trp53	chr11_69589179_69589208	TGTAATAGCTCCTGCATGG
sg032800	Slc2a4	chr11_69943474_69943503	TAAAAGTGCCTGAAACCAG
sg114403	Slc2a4	chr11_69943512_69943541	GATGAAGAAGCCAAGCAGG
sg073548	Slc2a4	chr11_69945300_69945329	CAGCCTCTGATCATCGCAG
sg073549	Slc2a4	chr11_69945661_69945690	CTGTGAGAGCCAGAAGCAG
sg032799	Slc2a4	chr11_69945844_69945873	ACCAGAATGCCAATGACGA
sg114402	Slc2a4	chr11_69946422_69946451	ACAGAGCTACAATGCAACG
sg003548	Aspa	chr11_73319793_73319822	CCAACAGGATACTTGGCAA
sg085564	Aspa	chr11_73319847_73319876	TCAATGAGATAAACAGAGC
sg003547	Aspa	chr11_73322143_73322172	GTGCAACCCATGTTAGAAG
sg044813	Aspa	chr11_73324309_73324338	ATTACCAATCCAAGGGCGG
sg044814	Aspa	chr11_73324312_73324341	TTCATTACCAATCCAAGGG
sg085563	Aspa	chr11_73324371_73324400	TTACTCACTGGCTAAGGAA
sg114085	Slc13a2	chr11_78399094_78399123	GATGGCCACCAATAGAGAG
sg073230	Slc13a2	chr11_78400188_78400217	TTGGGGAGTAGAAAAACCA
sg032477	Slc13a2	chr11_78403343_78403372	GGTGTGGTACCCGTCAGGG
sg032478	Slc13a2	chr11_78404655_78404684	CTAGCACGGACTCACAGGG
sg073229	Slc13a2	chr11_78404760_78404789	CCCCCGACGAACAATATGT
sg114084	Slc13a2	chr11_78406890_78406919	ACACCACAGCAGCGCCATG
sg104631	Nf1	chr11_79339999_79340028	ATGGCCGCACACAGGCCGG
sg022429	Nf1	chr11_79409530_79409559	GACGAGAGCAACATAAACA
sg104630	Nf1	chr11_79418656_79418685	GCGCACCCAGCAATACGAA
sg022430	Nf1	chr11_79447533_79447562	ATGAAAATGCACAAACGGG
sg063762	Nf1	chr11_79447558_79447587	GAAACGTGGCATGTCTCGG
sg063763	Nf1	chr11_79550993_79551022	AAAAGAGGGCTTTGTGCAG
sg087295	Car4	chr11_84957920_84957949	AGGATACCTTCAGTAGAGG
sg005259	Car4	chr11_84963446_84963475	CTATGACCAAAAGCAACAG
sg046535	Car4	chr11_84964110_84964139	GAGGTGCGTGCATTATCGG
sg046534	Car4	chr11_84964134_84964163	TGTACAGCCTCGTACCGGG
sg005258	Car4	chr11_84964365_84964394	AAGTTGACATCTAGCAAGG
sg087296	Car4	chr11_84964558_84964587	TGGGCAGTGCTTCCACCAG
sg117752	Tmem100	chr11_90035407_90035436	AATGGAGAAAAACCCCAAG
sg076915	Tmem100	chr11_90035444_90035473	GCTGAACCTCGCTGACCAA
sg036176	Tmem100	chr11_90035472_90035501	AGTTCGGCACCCCCGGTGG
sg036177	Tmem100	chr11_90035515_90035544	GAAGACCACCACGGCAAAG
sg076914	Tmem100	chr11_90035549_90035578	GGGATTGTGGTCACCGCTG
sg117753	Tmem100	chr11_90035622_90035651	GCTAGTAAAAACAGTCCGG
sg098290	Hlf	chr11_90340827_90340856	ATCAGCCACCTCCTGGCGG
sg098289	Hlf	chr11_90340925_90340954	CGCAGAAAGAACAACATGG
sg057431	Hlf	chr11_90345856_90345885	TGCCCTCTCCAGCATCCCG
sg016102	Hlf	chr11_90387923_90387952	CGTGCTGCGACGGACTCGG
sg057430	Hlf	chr11_90387997_90388026	GTATCTCCGTCATAGGGAA
sg016103	Hlf	chr11_90390294_90390323	ACCTGAGCACGCCGTAGGG
sg022508	Ngfr	chr11_95574240_95574269	GGAGCAATAGACAGGAATG
sg063841	Ngfr	chr11_95574356_95574385	CCCAGCACCCAGGAGCCGG
sg063840	Ngfr	chr11_95574394_95574423	CAAGGTCTACGCCCCCGGA
sg022507	Ngfr	chr11_95578043_95578072	GGGTAGGCACGGGTCCACG
sg104709	Ngfr	chr11_95578160_95578189	CACGCTGCAAGCCTCGCAG
sg104708	Ngfr	chr11_95578231_95578260	ATGTCCGCTCCCTGTGTGG
sg075152	Stac2	chr11_98041166_98041195	CAGCTCCAGCAGAAAGTGA
sg115995	Stac2	chr11_98041339_98041368	GACGAGCTAACAGAAGACG
sg075151	Stac2	chr11_98043543_98043572	GGCACCGCTCAAACCAGTG
sg115996	Stac2	chr11_98043610_98043639	CACCTGCATCCACAGACAG
sg034408	Stac2	chr11_98043674_98043703	GAGCTCAAGTGCCCAACAG
sg034407	Stac2	chr11_98052885_98052914	TCCACCCTCCAAGAAACCA
sg006256	Cdk12	chr11_98203627_98203656	GGCCTTCAAATCAGACCGG
sg047538	Cdk12	chr11_98203647_98203676	GGGAGAACGAGGAACGTCG
sg088303	Cdk12	chr11_98204242_98204271	TCCTTACAGCCGACGACAG
sg006255	Cdk12	chr11_98211009_98211038	CAGGAACTTGACTAAATGG
sg047539	Cdk12	chr11_98245470_98245499	GAGTTGTCTGTTCAGCAGG
sg088304	Cdk12	chr11_98250317_98250346	TATGGAAAACCCTACAGGG
sg049345	Csf3	chr11_98701550_98701579	GAGCGCTGACAGTGACCAG
sg008057	Csf3	chr11_98701592_98701621	ACTTAAGCAGGAAGCTTCG
sg090117	Csf3	chr11_98702023_98702052	GGGTGACACAGCTTGTAGG
sg090116	Csf3	chr11_98702066_98702095	CTTCGGGATCCCCAGAGAG
sg049346	Csf3	chr11_98702423_98702452	AATACCCGATAGAGCCTGC
sg008058	Csf3	chr11_98702798_98702827	CAGATGGAAAACCTAGGGG
sg070366	Rara	chr11_98970170_98970199	CGAAACAAAAAGAAGAAAG
sg111224	Rara	chr11_98970215_98970244	AGCTACACGCTGACGCCTG
sg029604	Rara	chr11_98970561_98970590	AAGTGCATCATTAAGACTG
sg070365	Rara	chr11_98971580_98971609	GATTCTGCGAATCTGCACG
sg029605	Rara	chr11_98972578_98972607	AGTCTACGTCCGGAAACGG
sg111225	Rara	chr11_98973554_98973583	CTACAGCTACCCGGAGGGG
sg118893	Trip11	chr12_101878067_101878096	GTCTTCTGACTCTAAGAGG
sg037318	Trip11	chr12_101884564_101884593	TCCTGTGAGTAGGACGCGG
sg118892	Trip11	chr12_101885426_101885455	ACTGATCATAAACGAACCA
sg037319	Trip11	chr12_101885966_101885995	AAGGAGAACCATGAACTGA
sg078055	Trip11	chr12_101889693_101889722	TATTGAGTCAAGAAAAGGT
sg078056	Trip11	chr12_101912786_101912815	CTGGCCCAAGCCGGAGCCG
sg091489	Dicer1	chr12_104702724_104702753	GGTACGTATTACTCAGTAG
sg009414	Dicer1	chr12_104705062_104705091	TGTGGTCAACATCCAGCAG
sg050706	Dicer1	chr12_104705194_104705223	CAGCTACATAAAATCGATG
sg050707	Dicer1	chr12_104706912_104706941	TGAACTCAACTTCAGGCGG
sg091488	Dicer1	chr12_104708831_104708860	GAGCTGGACTTACATGACG
sg009413	Dicer1	chr12_104712199_104712228	CAGTGTTGATTGTGACTCG
sg034888	Syne3	chr12_104955682_104955711	CAGGCGAGAGCTTTCCGTG
sg075630	Syne3	chr12_104959478_104959507	TTTGTAACCGGTCTACACG
sg075631	Syne3	chr12_104961432_104961461	CAGCAGATCCAACAGCTGG
sg116474	Syne3	chr12_104961641_104961670	TCGCCAAGGATTTCCCTAG
sg034887	Syne3	chr12_104967934_104967963	AGGATCGGAGACCCCAGCG
sg116475	Syne3	chr12_104975770_104975799	GGTCAATGACAACACGAAG
sg091571	Dlk1	chr12_109455003_109455032	CTCGCAGAATCCATACTGG
sg091570	Dlk1	chr12_109458193_109458222	ATTTACCCATTGATCACGC
sg009496	Dlk1	chr12_109459671_109459700	AAGTTGCCTGAGAAGCCAG
sg009495	Dlk1	chr12_109459734_109459763	CTAACCCATGCGAGAACGA
sg050789	Dlk1	chr12_109459783_109459812	GACGAATCCAGCTGGGCAG
sg050788	Dlk1	chr12_109459910_109459939	ACGTGGGACCCATGAACGG
sg083194	A530016l24rik	chr12_112495055_112495084	ATCCAACCAGAGAGAATGA
sg042448	A530016l24rik	chr12_112496866_112496895	TGGGTCTCAGGATAGAGGG
sg083193	A530016l24rik	chr12_112496899_112496928	CAAGAATGTGGATGCCACG
sg001189	A530016l24rik	chr12_112496907_112496936	TTTCTGTGGTTCACCCCCG
sg001190	A530016l24rik	chr12_112496956_112496985	AGTGGACAGCCACCTCCAG
sg042449	A530016l24rik	chr12_112497878_112497907	TCCAGCCAGCATCCCGCAG
sg050877	Dnah11	chr12_117880533_117880562	TTCCCGGCAGCGTAAGAGG
sg009584	Dnah11	chr12_117952561_117952590	ATTAGGATGACATCACCGA
sg091659	Dnah11	chr12_118020347_118020376	ACCAGAGACAACTCGTCTG
sg091658	Dnah11	chr12_118038693_118038722	TGGGGATATTGACCCCCTG
sg050876	Dnah11	chr12_118112817_118112846	CAGTGGAGACAGATTAACG
sg009583	Dnah11	chr12_118120688_118120717	TCGCCACTCCAAAACGCAG
sg001327	Abcb5	chr12_118911460_118911489	TGCGATGTGAATAGTGCCA
sg083331	Abcb5	chr12_118918218_118918247	AGGCTCTCCACCATTCGTG
sg042588	Abcb5	chr12_118919906_118919935	CGAACTAGCGCTCGAGCAA
sg083332	Abcb5	chr12_118927228_118927257	AAGGCCATTATGAAGTCGT
sg001328	Abcb5	chr12_118927288_118927317	ATATTAAGTTTGGGCGCGA
sg042587	Abcb5	chr12_118936089_118936118	CAGCACTTAAAGGACGCAA
sg063416	Nbas	chr12_13289933_13289962	TAGCAGTATTTATTCCATG
sg104285	Nbas	chr12_13310207_13310236	GAAGTGAATCGCCGCAAGG
sg022084	Nbas	chr12_13321664_13321693	TTGATTGATGTCAATTGGT
sg063417	Nbas	chr12_13328331_13328360	GTAGAGTAAAATCAAGAAG
sg022083	Nbas	chr12_13453078_13453107	TTGCCGAATGACATGACAT
sg104286	Nbas	chr12_13583537_13583566	CTGGCTAGACACCTGCAGG
sg037009	Tpo	chr12_30094812_30094841	CAATGATACATGCAAACAG
sg077746	Tpo	chr12_30098308_30098337	GTTTGGATCCGATAGTGAG
sg077747	Tpo	chr12_30103074_30103103	GCCAACACTGCCTACCAGG
sg037008	Tpo	chr12_30103153_30103182	GGCAGCGGTACACACCTTG
sg118584	Tpo	chr12_30105890_30105919	CTAAATGAGTACCAACCGG
sg118585	Tpo	chr12_30105965_30105994	AGCCATCTTCATAGACAGG
sg115178	Sntg2	chr12_30226760_30226789	ATGGAAGTTCAGAGAACCG
sg115177	Sntg2	chr12_30229584_30229613	TTTAAACAGCACCTCACAG
sg033578	Sntg2	chr12_30267015_30267044	ATTGCACGTACTTACTGTG
sg074324	Sntg2	chr12_30307323_30307352	TACCTTGATACTTAGGCCC
sg033577	Sntg2	chr12_30307342_30307371	CACTTCGCAGACAACCTGT
sg074325	Sntg2	chr12_30312631_30312660	GGCCTTGTTGTATGACGAG
sg033709	Sostdc1	chr12_36314369_36314398	TGTGAATAAAGGATTTCTG
sg033710	Sostdc1	chr12_36314433_36314462	CAGCACCCTGAATCAAGCC
sg115308	Sostdc1	chr12_36317064_36317093	CCACCAAATACATTTCGGA
sg074455	Sostdc1	chr12_36317154_36317183	TTCCCAACTGGATCGGAGG
sg074456	Sostdc1	chr12_36317182_36317211	AACAAAGTACTGGAGCCGG
sg115309	Sostdc1	chr12_36317230_36317259	CGACAAGACGCGCACCCAG
sg020486	Meox2	chr12_37108864_37108893	GGGTGCAAGCCTTGCGCTG
sg102694	Meox2	chr12_37108977_37109006	ATCGCGGGATACCCCAACG
sg061825	Meox2	chr12_37108980_37109009	GCGGGATACCCCAACGAGG
sg061824	Meox2	chr12_37109152_37109181	GCCTGCAGCCTGATTCGGG
sg102695	Meox2	chr12_37109189_37109218	GTTGGAACACAGGACCGGA
sg020487	Meox2	chr12_37109245_37109274	TAATCCCCTGGTGCGCACG
sg002112	Agmo	chr12_37252546_37252575	TACTACTGGTTCCACCGCA
sg084121	Agmo	chr12_37252551_37252580	CTCACCATGAGCCATGCGG
sg043373	Agmo	chr12_37357658_37357687	TATGAACAGCAAACACTGA
sg084120	Agmo	chr12_37402119_37402148	ATGGCTCAAATGTACCAAT
sg043374	Agmo	chr12_37405424_37405453	CTGAGTGAAGAAATTCCAG
sg002113	Agmo	chr12_37406015_37406044	GAGACCTTTGCAAACACAG
sg091807	Dnmt3a	chr12_3872857_3872886	ATCGAATCCATGAAAATGG
sg009732	Dnmt3a	chr12_3895591_3895620	ACCTTCTGAGACTCTCCAG
sg009731	Dnmt3a	chr12_3897320_3897349	GTTTACACCGACATGTGGG
sg051024	Dnmt3a	chr12_3897425_3897454	ATCATTGATGAGCGCACAA
sg091806	Dnmt3a	chr12_3902669_3902698	GTAGAACTCAAAGAAGAGG
sg051025	Dnmt3a	chr12_3902690_3902719	CCGCGCATCATGCAGGAGG
sg100448	Klhl29	chr12_5093544_5093573	AATGACAGCCTCAATACCA
sg059582	Klhl29	chr12_5094907_5094936	GCTAGAGTTTGTCTACACG
sg018244	Klhl29	chr12_5137519_5137548	GGTGGCAGGAACACTACTG
sg100449	Klhl29	chr12_5137802_5137831	GGAGTCACCCCGATGACGG
sg059583	Klhl29	chr12_5210088_5210117	GTGCTGCCACCAGCACCGG
sg018245	Klhl29	chr12_5210144_5210173	ATTGACGCTCCACTCACGG
sg044463	Arhgap5	chr12_52516641_52516670	ACATTTGTACCGATCAGCT
sg003197	Arhgap5	chr12_52516977_52517006	AAATGTTGGATAAAACTCG
sg085213	Arhgap5	chr12_52518591_52518620	CTAAATGGATCGCCACACA
sg003198	Arhgap5	chr12_52518706_52518735	AATTATTGGTGAAAAAAGG
sg044464	Arhgap5	chr12_52519349_52519378	GTTTAGGTTTAATAGGTGG
sg085214	Arhgap5	chr12_52542551_52542580	CTGTAACCAGATCCTGGAG
sg012466	Foxa1	chr12_57542704_57542733	CCCCGGACAAGCCAGGCAA
sg094565	Foxa1	chr12_57542732_57542761	AACGATTGTTTCGTCAAGG
sg012465	Foxa1	chr12_57542829_57542858	GCTGAGCGAGATCTACCAG
sg094564	Foxa1	chr12_57543046_57543075	GGACCCAGGCCGTTCATGG
sg053771	Foxa1	chr12_57543148_57543177	CTGTTCATGGCGCCTGCAG
sg053770	Foxa1	chr12_57543211_57543240	CCTAAGCCCGTGTTGGCGT
sg115909	Sstr1	chr12_58212730_58212759	CAGAATGGGACCTTAAGCG
sg034314	Sstr1	chr12_58212935_58212964	GGCCAGTGGCGCAACAGCG
sg075058	Sstr1	chr12_58212975_58213004	ATCCACGCTGAGCACCAGG
sg034313	Sstr1	chr12_58213109_58213138	TGGCCAAAGTAGTGAACCT
sg075057	Sstr1	chr12_58213305_58213334	AATGATGAGCACATAACAC
sg115910	Sstr1	chr12_58213612_58213641	AGCTGGATGGATAACGCTG
sg044251	Apob	chr12_7988880_7988909	GTCTCACCTGTTAACTGCG
sg085001	Apob	chr12_8002167_8002196	TGTTGCATGAGTATGCCAA
sg002985	Apob	chr12_8007145_8007174	CTGGTAGTGACATCAACAG
sg085002	Apob	chr12_8009335_8009364	AAGGGGACTATAAAGACAG
sg044252	Apob	chr12_8011392_8011421	AAACTGGCAACTCCAGGGG
sg002986	Apob	chr12_8013081_8013110	TCCAAGTGACATTATACAG
sg070889	Rgs6	chr12_82985315_82985344	ATGCAAGATGACAAGACAG
sg111748	Rgs6	chr12_83047556_83047585	AGGTACTGACATTGTACAG
sg030130	Rgs6	chr12_83051305_83051334	ATTGGGAAGATGTAGCCCT
sg070890	Rgs6	chr12_83059764_83059793	GACGATGCAGAACAAAGCA
sg111749	Rgs6	chr12_83070630_83070659	TGTTTGAAAATGTCCAAAG
sg030131	Rgs6	chr12_83116140_83116169	AAGCAACCTCTACAGGACG
sg066671	Osr1	chr12_9579314_9579343	CTTTAGAAAAAGAGGATCG
sg025897	Osr1	chr12_9579388_9579417	AATGACGTGGGGAAACCAG
sg107536	Osr1	chr12_9579464_9579493	GGTTAGCGAAATCAAAGCG
sg025898	Osr1	chr12_9579600_9579629	CAGAAAAGAAGCCAACAAG
sg107537	Osr1	chr12_9579664_9579693	ATAGGACTTAGTGAAGTGG
sg066672	Osr1	chr12_9579748_9579777	CTGCCACAAAGCTTTCCGG
sg067973	Pik3r1	chr13_101685006_101685035	TCGGCAAAGCCATAGCCGG
sg027206	Pik3r1	chr13_101687237_101687266	GATCATTGACAGTAGGAGG
sg108833	Pik3r1	chr13_101687515_101687544	TAGAGAAGTTTAAACGCGA
sg108832	Pik3r1	chr13_101701718_101701747	TGGAAATCTGAAAAGCACG
sg027205	Pik3r1	chr13_101709672_101709701	AGCTTTATAAGGAGAGGCG
sg067972	Pik3r1	chr13_101757460_101757489	GGCTACAATGAAACCACTG
sg102200	Map3k1	chr13_111748928_111748957	TCAGCAGCTCTCTGGACGG
sg102199	Map3k1	chr13_111758094_111758123	AGTGTCTACAACTGGCCGG
sg061330	Map3k1	chr13_111760130_111760159	CTTTCCCACGACGTTAGTG
sg019990	Map3k1	chr13_111763517_111763546	TCCACTTAGATCTACAAAG
sg019991	Map3k1	chr13_111769270_111769299	TAGTGTTGGACACTACCTG
sg061329	Map3k1	chr13_111769385_111769414	CATCACTTTGTTCACGCGG
sg071887	Ryr2	chr13_11595024_11595053	TCGTGGCCAGTGTCTGCAG
sg031130	Ryr2	chr13_11692664_11692693	TACTCATGTCAATAGCACG
sg112744	Ryr2	chr13_11710045_11710074	GGAGCCTGACATGTCCGCG
sg071886	Ryr2	chr13_11750905_11750934	ATGCCCATTGAATGTGCCG
sg112745	Ryr2	chr13_11759827_11759856	CCTCTCACAGGCACAGCGG
sg031129	Ryr2	chr13_11799823_11799852	CGTCACAAAGGGTTCCGTG
sg094275	Fgf10	chr13_118715503_118715532	CAGGACATGGTGTCACAGG
sg012176	Fgf10	chr13_118715610_118715639	GGAGAACAGCCTTCTCCAG
sg053480	Fgf10	chr13_118715651_118715680	TTCTCACGATTGAGAAGAA
sg094274	Fgf10	chr13_118781507_118781536	GTCCTGGAGATAACATCAG
sg053481	Fgf10	chr13_118781572_118781601	CTTAGCCATGAACAAGAAG
sg012177	Fgf10	chr13_118789249_118789278	GAGAGGACAAAAAACAAGA
sg047058	Ccl28	chr13_119623884_119623913	GGGCTCACACTCATGGCTG
sg005777	Ccl28	chr13_119645877_119645906	ACCTCAGTGCAACAGCTGG
sg087824	Ccl28	chr13_119645882_119645911	GCCTCCAGCTGTTGCACTG
sg005776	Ccl28	chr13_119645951_119645980	AGCATCCAGAGAGCTGACG
sg047059	Ccl28	chr13_119650891_119650920	CTTCAAAGTACGATTGTGC
sg087823	Ccl28	chr13_119650903_119650932	CAATCGTACTTTGAAGCAG
sg014826	Gpld1	chr13_24943636_24943665	AAGAGGCAGCAGAAGCAGC
sg014825	Gpld1	chr13_24948121_24948150	GGACGCATTAACTACAAAG
sg056143	Gpld1	chr13_24955118_24955147	ATATCATGACGTTTCTGAG
sg096988	Gpld1	chr13_24957502_24957531	AGTTGTAAAAATCGATCTG
sg096989	Gpld1	chr13_24975734_24975763	ATCGACCTGGACTTAGACA
sg056144	Gpld1	chr13_24984841_24984870	TGGATGACTCCATGTCCGG
sg119341	Tubb2b	chr13_34128186_34128215	ACCTACTGCATCGATAATG
sg037769	Tubb2b	chr13_34128474_34128503	AAGGGCCACTACACAGAGG
sg037768	Tubb2b	chr13_34128475_34128504	AAAGGGCCACTACACAGAG
sg078506	Tubb2b	chr13_34128880_34128909	TTTGGGCAGATCTTCAGGC
sg078505	Tubb2b	chr13_34129297_34129326	TCCATGGTAACTTCCAGTG
sg119342	Tubb2b	chr13_34130169_34130198	GGCAACCAGATCGGTGCCA
sg098859	Id4	chr13_48261563_48261592	CTGGCGCTACGCTGCCTGG
sg057999	Id4	chr13_48261679_48261708	GTCGTTCATATCGCACTGC
sg098860	Id4	chr13_48261703_48261732	CGACTGCTACAGTCGCCTG
sg058000	Id4	chr13_48261706_48261735	CTGCTACAGTCGCCTGCGG
sg016670	Id4	chr13_48261749_48261778	AACAAGAAAGTCAGCAAAG
sg016671	Id4	chr13_48261873_48261902	GGCGCGACCGGACAAGCCC
sg023498	Ogn	chr13_49609237_49609266	GTGAGTCCAGCTGCGACTG
sg064828	Ogn	chr13_49609297_49609326	GAAGAAACCAAATTTAGCC
sg105694	Ogn	chr13_49611372_49611401	CAACCAAGAAAGAAAATGA
sg105693	Ogn	chr13_49615622_49615651	GCTGTACCACCATTGCCAA
sg064829	Ogn	chr13_49621060_49621089	GACTTTCTGGTAAATTAGG
sg023499	Ogn	chr13_49622884_49622913	ATTGAAGAGATTCGCCTGG
sg105286	Nsd1	chr13_55238706_55238735	TATCGCGAATACTACGTAG
sg064422	Nsd1	chr13_55245834_55245863	ATCACGTAAAGAAGAACGG
sg064421	Nsd1	chr13_55247949_55247978	AGGCGCAACCGATTCAGAG
sg105287	Nsd1	chr13_55247968_55247997	TCTCACAAACATTCAGCCG
sg023090	Nsd1	chr13_55282726_55282755	CCCTCGAGGCATCTCGGGG
sg023091	Nsd1	chr13_55313518_55313547	CTGGGAAAAGCCTCACCAG
sg057539	Hnrnpk	chr13_58393749_58393778	CAGACTATTCTTATGCAGG
sg098398	Hnrnpk	chr13_58394470_58394499	TCCACCACCACCCAGAGGG
sg016210	Hnrnpk	chr13_58394535_58394564	GGCCACCTCGACCAGGTGG
sg016209	Hnrnpk	chr13_58394561_58394590	ATGATATGAGCCCTCGTCG
sg057538	Hnrnpk	chr13_58395161_58395190	TACCTCAGATATAAGGTCA
sg098397	Hnrnpk	chr13_58397739_58397768	TGTTGGGACATACCGCTCG
sg023176	Ntrk2	chr13_58808840_58808869	TCAGTACACCAAATCCTAG
sg105372	Ntrk2	chr13_58837837_58837866	TGACGTTGAAGCTTACGTG
sg064507	Ntrk2	chr13_58861276_58861305	ATGCACCAGTGGTGATCTG
sg023177	Ntrk2	chr13_58934032_58934061	AAGGTGTTGACTTACCCAG
sg064508	Ntrk2	chr13_58934262_58934291	ATCAGAAAGAAAAAAAGGG
sg105373	Ntrk2	chr13_58934528_58934557	GGGGGACCAAAGAAAGCCA
sg028948	Ptch1	chr13_63523071_63523100	GATGGATAGCAGCAGCCAG
sg028947	Ptch1	chr13_63527202_63527231	AAAAATGGATCAGATGACG
sg110570	Ptch1	chr13_63540705_63540734	AATGCCAATCAAGGAGCAG
sg069711	Ptch1	chr13_63541163_63541192	GTGTCATCCGAGTGGCCAG
sg069710	Ptch1	chr13_63542157_63542186	TGGCAGAGGACTTACGTGG
sg110569	Ptch1	chr13_63563634_63563663	GCTAATCTCGAGACCAACG
sg007441	Cntnap3	chr13_64771948_64771977	CAGGGCCCTCAGATACAGG
sg089498	Cntnap3	chr13_64772100_64772129	TCTGACTGTCACTACATCG
sg048728	Cntnap3	chr13_64787835_64787864	TGTTCGAAGCTGAAAAGCG
sg048729	Cntnap3	chr13_64793377_64793406	TCATGATAGAATTAACAGG
sg007440	Cntnap3	chr13_64794280_64794309	GCCATAAGACCAGTAAGAG
sg089499	Cntnap3	chr13_64858741_64858770	TGTATCAAATAAATATCAG
sg099586	Irx1	chr13_71959740_71959769	GTCTCAGCAGCCGACAATG
sg017384	Irx1	chr13_71959842_71959871	ATCAGATCGACGAGCGTGA
sg099587	Irx1	chr13_71960176_71960205	TATGGTCAGTTTCAATACG
sg017385	Irx1	chr13_71960245_71960274	GAACTGAAGGACAACCCCG
sg058723	Irx1	chr13_71963283_71963312	GTGCTAGGCATGTATGCCG
sg058722	Irx1	chr13_71963294_71963323	GCATACATGCCTAGCACCG
sg117201	Tert	chr13_73627401_73627430	CGCAACGAGAGAAACGTGC
sg076361	Tert	chr13_73627465_73627494	CTACGCACGCTACTAGTGA
sg076360	Tert	chr13_73627666_73627695	ACAGAGGGCCAGATATCCG
sg035622	Tert	chr13_73627953_73627982	AGTCCTGCTCGGTCCCCCG
sg117200	Tert	chr13_73628193_73628222	CTCCAGCCTAACTTGACTG
sg035621	Tert	chr13_73636391_73636420	CAGCATGCTCAACTATGAG
sg007001	Ckmt2	chr13_91859234_91859263	TGATCTCAATGGAAAAGGG
sg089052	Ckmt2	chr13_91861281_91861310	CACTGGCCGAAGCATCCGC
sg089051	Ckmt2	chr13_91861300_91861329	CGGCCAGTGCGTACCCGAG
sg048287	Ckmt2	chr13_91863171_91863200	CACAGTCTTAATGAAGGGG
sg048286	Ckmt2	chr13_91863221_91863250	ACACCCAGTGGCTATACCC
sg007000	Ckmt2	chr13_91865232_91865261	CTATTCAGCAGGTAACCAG
sg086526	Bhmt2	chr13_93662353_93662382	CATGTTTCTCTGAAGCCGG
sg045767	Bhmt2	chr13_93663718_93663747	ATGTGCATCGGCCCAGAGG
sg004493	Bhmt2	chr13_93663719_93663748	CATGTGCATCGGCCCAGAG
sg045766	Bhmt2	chr13_93669307_93669336	CACACAGAATTCTTGAGAG
sg004494	Bhmt2	chr13_93671424_93671453	CTTTGGACTCCAGAAGCAG
sg086525	Bhmt2	chr13_93671446_93671475	GAGAGGCTTCGTGAAGGCG
sg049208	Crhbp	chr13_95436435_95436464	TAAGGGCATCATCTTGGAG
sg007920	Crhbp	chr13_95436506_95436535	GTGTTCTCTTAGAAACCTG
sg007919	Crhbp	chr13_95443792_95443821	TTCTTCATCGGCGAACCCG
sg049207	Crhbp	chr13_95444167_95444196	CAACTCACGCAGAGCCCGT
sg089978	Crhbp	chr13_95444237_95444266	AGGAGAGGGTCGTAGACCG
sg089979	Crhbp	chr13_95444247_95444276	CTCCAGGTGCAAGAAGCCG
sg050254	Dct	chr14_118013032_118013061	AGCAGCAAGAGATACACGG
sg050253	Dct	chr14_118039619_118039648	AACTCGAGATTCTCTACCT
sg091032	Dct	chr14_118040491_118040520	TACCTGTGCCACGTGACAA
sg008961	Dct	chr14_118043273_118043302	TTGCTGGTTATAATTGTGG
sg008962	Dct	chr14_118051633_118051662	TTGCCTCGGGACCCAGAGG
sg091031	Dct	chr14_118051681_118051710	CCAAGGTCATGCAGACTCG
sg107620	Oxgr1	chr14_120021819_120021848	TAGTGAGATGCAAAGCCAG
sg025982	Oxgr1	chr14_120022199_120022228	GTACCACTTGATAGTAGTG
sg107619	Oxgr1	chr14_120022382_120022411	GTGAATGATCACAACGTAA
sg025981	Oxgr1	chr14_120022545_120022574	AGATACAGCAAGTCCGTCA
sg066754	Oxgr1	chr14_120022667_120022696	GATGCTATAGATGACGGGA
sg066755	Oxgr1	chr14_120022762_120022791	CACTGGCTGGACTGTCCAG
sg019461	Lrrc3b	chr14_15357853_15357882	CTGCCAAGCAGGCAAAAGA
sg101676	Lrrc3b	chr14_15358157_15358186	TAGGATTGCTAACAACCCA
sg101677	Lrrc3b	chr14_15358233_15358262	CTGTTGTCAGACAAGTCCA
sg060804	Lrrc3b	chr14_15358325_15358354	AAGCACTCTCAGTTGATGG
sg019460	Lrrc3b	chr14_15358458_15358487	GTGACATTTAACCCTCCAG
sg060805	Lrrc3b	chr14_15358535_15358564	CAGTACAAAGCTTTGGAGG
sg017680	Kat6b	chr14_21517159_21517188	TGCGTAGATCATTACACGG
sg099884	Kat6b	chr14_21628847_21628876	CCCGAACTCTATTACTGAG
sg017681	Kat6b	chr14_21662417_21662446	CTGTGGCTTAGTCAACCGA
sg059018	Kat6b	chr14_21664479_21664508	AAGGGGTCGTAAACGCAGG
sg099885	Kat6b	chr14_21668562_21668591	CTCCCGTTCCATCCCCACG
sg059019	Kat6b	chr14_21669242_21669271	TCGGAGTCAATTTCCACAG
sg109048	Plac9b	chr14_25888944_25888973	TGAAGCCAGTTCCTCCAGC
sg027419	Plac9a	chr14_25888982_25889011	AAGACAGTGGAGCACCTGG
sg068186	Plac9a	chr14_25890753_25890782	CGGTTAGACATTATGGAGG
sg068185	Plac9a	chr14_25890772_25890801	ACACGCGGCTGTGCAAAGG
sg109046	Plac9a	chr14_25890786_25890815	CCAGGCTGTGACAGACACG
sg068188	Plac9b	chr14_25890803_25890832	GAGATCTAGCTGGGAGCCC
sg109045	Plac9a	chr14_25902778_25902807	TTCTTACCTCGCCGTCCGG
sg027421	Plac9b	chr14_25902787_25902816	AAGGTCCCAGGGACACCCC
sg027418	Plac9a	chr14_25902811_25902840	GTGCCGGGACGGGCGAATG
sg109047	Plac9b	chr14_26170138_26170167	AGGCGGTTAGACATTATGG
sg027420	Plac9b	chr14_26170157_26170186	CAGACACGCGGCTGTGCAA
sg068187	Plac9b	chr14_26170197_26170226	CTCCCAGCTAGATCTCCAG
sg005024	Cacna1d	chr14_30042783_30042812	CAAGAACAGCGACAAGCAG
sg087059	Cacna1d	chr14_30096964_30096993	ATCATGTATTCGAAAGGCG
sg046298	Cacna1d	chr14_30100728_30100757	CAGCGCCATCATAGCCGAA
sg005023	Cacna1d	chr14_30124896_30124925	GAACCGGTTCAATCGCAGG
sg087060	Cacna1d	chr14_30178647_30178676	ATGGCACGGAATGTAGGAG
sg046299	Cacna1d	chr14_30353329_30353358	TGGTCCCCTCCTCTAGCGG
sg107946	Pbrm1	chr14_31027524_31027553	CATTAGGGCTCCAAAGCGG
sg026309	Pbrm1	chr14_31032409_31032438	CAAGCAGCTTTATACTCAG
sg067082	Pbrm1	chr14_31046333_31046362	ATAAAAGAGCAGTCCAAGG
sg026310	Pbrm1	chr14_31061712_31061741	AATGCCAGGCACTACAATG
sg107947	Pbrm1	chr14_31067842_31067871	TAATGTCAAATGTAAGGGG
sg067083	Pbrm1	chr14_31074888_31074917	AAACACTTGCATAACGATG
sg095001	Galnt15	chr14_32029638_32029667	CAAACACAGCCCTGACACG
sg012898	Galnt15	chr14_32029839_32029868	CTACCAGTTCATCAAACAC
sg012899	Galnt15	chr14_32029996_32030025	CTGAGGAGAGTCCTGCCCG
sg095002	Galnt15	chr14_32040360_32040389	TGCAGCAGCACCCTACAAG
sg054204	Galnt15	chr14_32048081_32048110	GACATTACTTCCAAAACAC
sg054205	Galnt15	chr14_32056344_32056373	ATTCTGCAGAACTGCACGG
sg013105	Gdf10	chr14_33924045_33924074	GACTCCCAGCAGTCACCCG
sg095209	Gdf10	chr14_33924130_33924159	ATGAGAAGTACAACCGAAG
sg013106	Gdf10	chr14_33931929_33931958	CTACTCAGAACCTCCACGG
sg054412	Gdf10	chr14_33931972_33932001	AGGATGCGTTCTTAGCTCG
sg095210	Gdf10	chr14_33932099_33932128	CCCTGACGCCTCCACCACG
sg054413	Gdf10	chr14_33932573_33932602	AAGTCCAGCACCTGAGAGG
sg048597	Cmtm5	chr14_54936675_54936704	CGCCGGGAACGGCCCCCAG
sg089366	Cmtm5	chr14_54936758_54936787	TACCAGCTCAGTTTCCAGC
sg007311	Cmtm5	chr14_54937889_54937918	ATGAAGATGATGAAGGTCA
sg007310	Cmtm5	chr14_54937960_54937989	CTAGAGTTCCTCATCACAC
sg048598	Cmtm5	chr14_54937994_54938023	AAGCGCTGGTAGTACTGCG
sg089367	Cmtm5	chr14_54938580_54938609	GATGGCGCTGAGACACCGG
sg048556	Cma1	chr14_55941760_55941789	CTATCCCAGCACACAGCAG
sg089325	Cma1	chr14_55942339_55942368	CCAAGCTAACCCTAGGTGT
sg089324	Cma1	chr14_55942637_55942666	AACATCTAAAGAAGACACG
sg048555	Cma1	chr14_55943691_55943720	TGCAGCTCACTGTGCGGGA
sg007268	Cma1	chr14_55943787_55943816	TTCCAGATAGGCCATGTAG
sg007269	Cma1	chr14_55944538_55944567	GCCTGCAGCAGCCCTGAGG
sg008257	Ctsg	chr14_56100646_56100675	GGAACAAATGTACTCCAGG
sg049546	Ctsg	chr14_56100666_56100695	GCCGGGTAAGCCAGAGCAG
sg008258	Ctsg	chr14_56100712_56100741	AGCAAAAAACTGCAGCCAG
sg090316	Ctsg	chr14_56101003_56101032	CTGCGGATTGTAATCAGGA
sg090317	Ctsg	chr14_56101080_56101109	TCCATAAATGTTACTCTAG
sg049545	Ctsg	chr14_56101682_56101711	CAGAAGAAATGCCATGTAG
sg062616	Mrpl57	chr14_57826563_57826592	GTGGATCGGGAAGCACCGG
sg021280	Mrpl57	chr14_57826586_57826615	TCCTTCGCTTGGAAAGACA
sg021279	Mrpl57	chr14_57826591_57826620	ACCGTGTCTTTCCAAGCGA
sg103483	Mrpl57	chr14_57826615_57826644	AGCATGATCCGTCGCCTGG
sg062615	Mrpl57	chr14_57826644_57826673	GGGCATGCTGAGCCAGTAG
sg103484	Mrpl57	chr14_57826726_57826755	TTTGAAGCCATCAAGGCAG
sg086931	C1qtnf9	chr14_60772423_60772452	ATGGACGAGATGGTGCCAA
sg046171	C1qtnf9	chr14_60777050_60777079	GGAAAGGATGGAATTCGTG
sg004897	C1qtnf9	chr14_60779294_60779323	AGGCTCCAGAGGATCTCCG
sg046172	C1qtnf9	chr14_60779410_60779439	TGGGCCCCACTGGACCCGA
sg086932	C1qtnf9	chr14_60779658_60779687	TAATGGGTGCATCTGGGGG
sg004898	C1qtnf9	chr14_60779895_60779924	GTGCAGGAGCTGAAACTCG
sg113689	Sgcg	chr14_61221596_61221625	CAGTGGTCAAAGACAGACG
sg072834	Sgcg	chr14_61221722_61221751	TTTGACCAAGTTGAAGCAG
sg032079	Sgcg	chr14_61232444_61232473	GGCAAGCCACTGTTCTCTG
sg113688	Sgcg	chr14_61245791_61245820	GAGAGCGAGATTCACAACG
sg032080	Sgcg	chr14_61245848_61245877	GATTGGCATTTACGGATGG
sg072833	Sgcg	chr14_61245893_61245922	CGAGGGCACTCACATAGAG
sg031367	Scara5	chr14_65689765_65689794	AGGTCCATGTCACAAACGG
sg112979	Scara5	chr14_65730532_65730561	AGCGCCTTCAAGTCATCTG
sg072123	Scara5	chr14_65731154_65731183	GGAACACTCCATCGCCTTG
sg031368	Scara5	chr14_65743330_65743359	ACTTGAGAACCCAAACAGG
sg112980	Scara5	chr14_65743732_65743761	GTGAAGAAAAGCATCAAAG
sg072124	Scara5	chr14_65744654_65744683	TTGGGTCAAGGACCTGCAG
sg043268	Adra1a	chr14_66637868_66637897	TTCTGCAACATCTGGGCGG
sg084014	Adra1a	chr14_66638096_66638125	ACCATCTGCCAAATCAATG
sg002006	Adra1a	chr14_66638183_66638212	ATGTACTGTCGAGTCTACG
sg002007	Adra1a	chr14_66638295_66638324	ATGTCCCTGCAGAAGGCAG
sg043267	Adra1a	chr14_66638437_66638466	CTCACCAATGGGCATCACG
sg084015	Adra1a	chr14_66732552_66732581	AGTGAGTCAAAATACACAG
sg046711	Ccar2	chr14_70141717_70141746	CCTGAACCTGAGAAGGAGG
sg046710	Ccar2	chr14_70141992_70142021	GAGACAGGTTGACACAGCG
sg087471	Ccar2	chr14_70142460_70142489	CGGCAGTTACACACAGTAG
sg005435	Ccar2	chr14_70142488_70142517	GTTTCAGTACTTACAGCCG
sg005434	Ccar2	chr14_70143787_70143816	GTTCTAGGAAGTCACAGGT
sg087472	Ccar2	chr14_70151603_70151632	TGAAGGCCGCATACAACCC
sg070458	Rb1	chr14_73198558_73198587	TGCAGTAAACATCTCCCAG
sg111317	Rb1	chr14_73213024_73213053	TTCTGAGTATGGAAGGCTG
sg029696	Rb1	chr14_73216673_73216702	CAGTATGGTTACCCTGGAG
sg029697	Rb1	chr14_73262660_73262689	AAGTACGTTCAGAATCCAC
sg111316	Rb1	chr14_73265538_73265567	GAGAAGTTTGCTAACGCTG
sg070457	Rb1	chr14_73280150_73280179	AATGATACGAGGATTATCG
sg051000	Dnase1l3	chr14_7974090_7974119	TCATGGGTGATTTCAACGC
sg051001	Dnase1l3	chr14_7977126_7977155	CACGGATGTGAGAAGCCAG
sg091782	Dnase1l3	chr14_7977192_7977221	CTCGGGAGTTGTGTGCAAG
sg009708	Dnase1l3	chr14_7983044_7983073	ATGGTCTCACCAGTAAAGG
sg091783	Dnase1l3	chr14_7983107_7983136	ACTACCATGACTATCAGGA
sg009707	Dnase1l3	chr14_7984066_7984095	CACACTCACTTGTAGACGA
sg064849	Olfm4	chr14_80000388_80000417	AATTCCCGGGAATGTGCAG
sg064848	Olfm4	chr14_80000448_80000477	CTGCCTGGTTGCCTCCGGG
sg105714	Olfm4	chr14_80000453_80000482	CCCAAGAAGTGCCTCCCGG
sg023519	Olfm4	chr14_80011797_80011826	AATAAGTGTGTATGAGAAG
sg105713	Olfm4	chr14_80011969_80011998	ATTGACATGCTCGAAGTGG
sg023518	Olfm4	chr14_80021150_80021179	AGTTGAGCTGAATCACAGA
sg011345	Fam107a	chr14_8298763_8298792	AACCCACCACAGAGAGACG
sg052642	Fam107a	chr14_8299574_8299603	CTGATCAAAAAGAAGGAGG
sg093431	Fam107a	chr14_8299577_8299606	CAGCTGATCAAAAAGAAGG
sg052641	Fam107a	chr14_8299602_8299631	AGTTCTAGAGCACCGTCGC
sg093432	Fam107a	chr14_8301046_8301075	TTATGAACCACAAAAGGTA
sg011344	Fam107a	chr14_8301099_8301128	GCTCCGAGAAGCCTTCACA
sg064835	Oit1	chr14_8349318_8349347	AACAAACAAATATGACGGA
sg064834	Oit1	chr14_8353851_8353880	GTCCCTGGGTCATCATAGG
sg105699	Oit1	chr14_8357132_8357161	GTCCAGTGCGAAACAACGT
sg023504	Oit1	chr14_8358342_8358371	GTCTTCAAAGCACATGGAG
sg023505	Oit1	chr14_8358376_8358405	TTGCATTTAAAATCAGCAG
sg105700	Oit1	chr14_8358426_8358455	GACCCCGAAGTCCAAGTGT
sg107998	Pcdh9	chr14_93015539_93015568	AGTCCTATAAGCAAGCAGG
sg026361	Pcdh9	chr14_93887271_93887300	TTCTGAAAACAACCGACGT
sg026362	Pcdh9	chr14_93887634_93887663	GGGACTTATAATGTACCTG
sg067134	Pcdh9	chr14_93888050_93888079	GTGATGAAAATCAAAGTGG
sg107997	Pcdh9	chr14_93888491_93888520	TACTCGATACTTTCACCAG
sg067133	Pcdh9	chr14_93888493_93888522	CTCGATACTTTCACCAGAG
sg018522	Krt5	chr15_101709779_101709808	GATGAACCGAATGATCCAG
sg100727	Krt5	chr15_101710267_101710296	GCCAACCGCAGCCGAACAG
sg100726	Krt5	chr15_101710557_101710586	AAGTTGATCTCGTCCATCA
sg018521	Krt5	chr15_101710761_101710790	GAGATCAACAAGCGTACCA
sg059860	Krt5	chr15_101711602_101711631	CCCGTCCAGCTGTCTACGG
sg059861	Krt5	chr15_101712571_101712600	TATCCTACAGTTCTGGCGG
sg099068	Igfbp6	chr15_102144656_102144685	TGCAGACTGGTTGTCGCGG
sg016870	Igfbp6	chr15_102144713_102144742	ACGGCTGTACAGAAGCCGG
sg016869	Igfbp6	chr15_102144745_102144774	AGAGAGGGACAACCGTGCG
sg058203	Igfbp6	chr15_102144820_102144849	CGATTAGCAGCGCCCGCAA
sg099069	Igfbp6	chr15_102147878_102147907	GTGGTTTGTGTCACGAGAG
sg058204	Igfbp6	chr15_102147934_102147963	ACAGGATTGGGCCGTATAG
sg068870	Ppp1r1a	chr15_103532427_103532456	CTAGGGCAACAGAAGCAAG
sg028104	Ppp1r1a	chr15_103532444_103532473	CGATGGTTGAACATCACCT
sg109729	Ppp1r1a	chr15_103533027_103533056	GATGCCAAACCTTTCATGG
sg028105	Ppp1r1a	chr15_103533065_103533094	GTCAATGTCTCCACGGCAA
sg068869	Ppp1r1a	chr15_103533453_103533482	CACCTTGAGAAGTGAGTTG
sg109730	Ppp1r1a	chr15_103537799_103537828	GAGCCTCACCTGGACCCGG
sg050882	Dnah5	chr15_28272135_28272164	CAGACGCTGAACAAAGCCG
sg009589	Dnah5	chr15_28312281_28312310	CTGATCGAGATTACCACGA
sg091665	Dnah5	chr15_28343645_28343674	AAGAATAGGACTCCAGTCG
sg091664	Dnah5	chr15_28372283_28372312	GGTGGTTAAGGGATGCGAT
sg050883	Dnah5	chr15_28444105_28444134	ATGGGAGAAAACTATGCAG
sg009590	Dnah5	chr15_28448326_28448355	AAGCCCATGCTATATGCGG
sg020176	Matn2	chr15_34345052_34345081	AACACCTATGACTATGCAA
sg102385	Matn2	chr15_34345419_34345448	TCCACCTGACCGACACCGA
sg061515	Matn2	chr15_34388796_34388825	GTTAAGAGCAAATCCCTCG
sg102386	Matn2	chr15_34399116_34399145	CATGAAGCCTTTCAGGCAG
sg020177	Matn2	chr15_34423702_34423731	TCTGCCAGGATGTTAACCA
sg061516	Matn2	chr15_34428819_34428848	GAGTGGGCCAGTAAAGCCA
sg119658	Ubr5	chr15_38000638_38000667	CATTCGGAACCCACAGCAG
sg078822	Ubr5	chr15_38002602_38002631	ATGAGGTTTCTACGATCTG
sg119657	Ubr5	chr15_38004323_38004352	CTGTTCTTAGTACAGACCG
sg038084	Ubr5	chr15_38008008_38008037	CTTACAGCTGACATAAACG
sg038085	Ubr5	chr15_38018405_38018434	CAATGGCCAAGGATTGCAT
sg078821	Ubr5	chr15_38037944_38037973	TCTACGTTTACGGGAGCGG
sg068239	Plcxd3	chr15_4375784_4375813	GGATGGCTAAATTGGTGAG
sg027332	Pkhd1l1	chr15_44495581_44495610	TGTAAACATCAGAATCTGG
sg027331	Pkhd1l1	chr15_44511583_44511612	AGAGGAAATAATTGGCCAG
sg108958	Pkhd1l1	chr15_44512909_44512938	AAGAGGTTGCTTTCCACGG
sg068099	Pkhd1l1	chr15_44514891_44514920	CAGTTACCACAATAAAGGA
sg108959	Pkhd1l1	chr15_44545477_44545506	GGAAGAATAGAATACGTAG
sg068098	Pkhd1l1	chr15_44569947_44569976	TACTGTGCCAGATAAACAG
sg109099	Plcxd3	chr15_4516741_4516770	GTGAAGCTCATCGTCTGAG
sg027472	Plcxd3	chr15_4516796_4516825	GGGCTTGGTGGAAATTCGA
sg027473	Plcxd3	chr15_4517049_4517078	GTGAGTCTAAAGTACCTAT
sg109100	Plcxd3	chr15_4517306_4517335	CAGAGAAACAATCACAGAG
sg068240	Plcxd3	chr15_4574844_4574873	TATGTCTTCAATGAAGGAG
sg004957	C6	chr15_4731781_4731810	TGGAACCCAGAGCAGACAG
sg046232	C6	chr15_4735174_4735203	ATGGTTGAAAGGTCACCAG
sg086994	C6	chr15_4781941_4781970	AGCTGTCTGAAAAATATGG
sg008073	Csmd3	chr15_47820387_47820416	TACCCCAAAAATTACAGTG
sg004958	C6	chr15_4789541_4789570	GTGCCCTTCTCCCAAGCCA
sg049361	Csmd3	chr15_47914065_47914094	CATCTGCAACAAATAACGA
sg046233	C6	chr15_4792684_4792713	ATGCAGTGGATGGAAACTG
sg090133	Csmd3	chr15_47970112_47970141	GAAATCGTGACCATATCGA
sg049362	Csmd3	chr15_47970123_47970152	CATATCGACGGCCATGGAC
sg086993	C6	chr15_4798332_4798361	TTGAGCTGACATGCCCCAG
sg090132	Csmd3	chr15_48313897_48313926	CTGGATCCCAACACACCCG
sg008074	Csmd3	chr15_48359307_48359336	AGCACTAAATCCTCGGTAG
sg046235	C7	chr15_5005200_5005229	ATGTGGAGAAGACTTACAG
sg004959	C7	chr15_5012009_5012038	TGTCTCCACAACAATAGCG
sg046234	C7	chr15_5031971_5032000	ATACTGATCGATTAACCGT
sg086995	C7	chr15_5045717_5045746	TCAACACCAAAAGTTTCGG
sg004960	C7	chr15_5046873_5046902	TAAGTTCTATGTTGGGAGG
sg086996	C7	chr15_5049585_5049614	AATCCTGCAAACCTGAACG
sg052720	Fam135b	chr15_71456974_71457003	GAATGTCTTCACCAGCCGG
sg011422	Fam135b	chr15_71459744_71459773	TTCCCACCAGAGGAAGAGG
sg093511	Fam135b	chr15_71462802_71462831	GGGGATGTCCATGTAACCA
sg011421	Fam135b	chr15_71463289_71463318	CCTGAATCAGATATTATGG
sg093512	Fam135b	chr15_71490744_71490773	GATGACCAGGAAATAGAGT
sg052719	Fam135b	chr15_71525656_71525685	TAACTCCATACCTGATCAG
sg014821	Gpihbp1	chr15_75597532_75597561	TGTCAAGTGCTTCACAGCG
sg096984	Gpihbp1	chr15_75597747_75597776	CAGGTATCAGTACACCACA
sg014822	Gpihbp1	chr15_75597776_75597805	CAGCCCATCATCAAGACAG
sg096985	Gpihbp1	chr15_75597835_75597864	ACTGTGCAATATTCCACCC
sg056139	Gpihbp1	chr15_75597867_75597896	AAGTCCAGAACCCTCTGGG
sg056140	Gpihbp1	chr15_75597943_75597972	AGCAGCCTTGACAACCTGG
sg090495	Cyc1	chr15_76343661_76343690	GTCCCGGCAGCTTCCATTG
sg008437	Cyc1	chr15_76344368_76344397	GCTAGCCCTGCACCCCCCG
sg008436	Cyc1	chr15_76344449_76344478	GCTACCCATGGTCTCATCG
sg049725	Cyc1	chr15_76344620_76344649	CGCCACATAATCCATGCTG
sg049724	Cyc1	chr15_76344660_76344689	GTGGGAGTGTGCTACACGG
sg090496	Cyc1	chr15_76344939_76344968	AGCTCGAACGATGTAGCTG
sg063112	Myh9	chr15_77769807_77769836	CTGCAGGTCAAGTTCAGCG
sg021779	Myh9	chr15_77783473_77783502	GGACTATAAAGCTGACGAG
sg103982	Myh9	chr15_77788976_77789005	ATGTGACCGACTTCACCAG
sg103981	Myh9	chr15_77792242_77792271	CTGGTACTCACGAATCGAG
sg063113	Myh9	chr15_77807922_77807951	GATGTACAAGGGCAAGAAG
sg021780	Myh9	chr15_77812882_77812911	CAAGGAGCGATACTACTCA
sg033722	Sox10	chr15_79156046_79156075	GAGGGCCCCATGTAAGAAA
sg033721	Sox10	chr15_79156464_79156493	CACGAGGTAATGTCCAACA
sg115320	Sox10	chr15_79159291_79159320	CAAGTACCAACCTCGGCGG
sg115321	Sox10	chr15_79159356_79159385	AAGCGCCCCTTCATTGAGG
sg074467	Sox10	chr15_79163603_79163632	CGTCGCTGGGACCCGACGG
sg074468	Sox10	chr15_79163610_79163639	CGCCGTCGGGTCCCAGCGA
sg052110	Ep300	chr15_81616794_81616823	TACTGGAATTCGAAAACAG
sg092900	Ep300	chr15_81623459_81623488	CTGACCCGTCTATGATCCG
sg010815	Ep300	chr15_81628652_81628681	AAAACTGATGGGAAAGAGG
sg010814	Ep300	chr15_81632470_81632499	GTAGTAAGTAGCATCACGG
sg092899	Ep300	chr15_81640451_81640480	GAAGAAATGAACACTATCG
sg052111	Ep300	chr15_81649988_81650017	GGCTGCATTCATCAAGCAG
sg042619	Abcd2	chr15_91182748_91182777	ATGGTTAGCGATCGGACAG
sg042620	Abcd2	chr15_91190714_91190743	TCGGGAGTGGACATACCGC
sg001360	Abcd2	chr15_91190853_91190882	TCCGGACAGCTACATCCAG
sg083364	Abcd2	chr15_91190938_91190967	ATGATGTTCTCGCAATCTG
sg083363	Abcd2	chr15_91191114_91191143	CTGATAGCACTGTTGACAA
sg001359	Abcd2	chr15_91191263_91191292	GATTAGAGCCACCGAGTGG
sg085282	Arid2	chr15_96356877_96356906	TTACTGCTCGCTAATGCGG
sg003265	Arid2	chr15_96368726_96368755	CTTGCAGTAAATTAGCTCG
sg044531	Arid2	chr15_96370128_96370157	TTGCCTTAACGACTTCACA
sg085281	Arid2	chr15_96370862_96370891	CTGAACCGTCTGACCGGCA
sg003266	Arid2	chr15_96370995_96371024	TCTGACTGACAGTAGGAGG
sg044532	Arid2	chr15_96371715_96371744	ATTTGCCAAAAGGAGGAGG
sg018722	Lalba	chr15_98480700_98480729	CTCTGAGAAGCTTGAACAG
sg100929	Lalba	chr15_98482093_98482122	AGTAGTGAGTTCCCCGAGT
sg100928	Lalba	chr15_98482164_98482193	AAGCTGTTGTCAACGACAA
sg018721	Lalba	chr15_98482206_98482235	CTGGTATGAAATAAAACAC
sg060061	Lalba	chr15_98482555_98482584	ATGCCATTAAAGACATAGA
sg060060	Lalba	chr15_98482626_98482655	CAACGACAAAATACACACC
sg059748	Kmt2d	chr15_98850038_98850067	TTCACCATTAATACCCCCA
sg018410	Kmt2d	chr15_98852243_98852272	AATGGCTGTTGATCCCATG
sg100615	Kmt2d	chr15_98856071_98856100	GGGGATGGACAGCCCGACG
sg018411	Kmt2d	chr15_98859548_98859577	CTGTGAACAGGCCAAGAGG
sg100614	Kmt2d	chr15_98861752_98861781	CGGGCCGGACTAACATCCG
sg059749	Kmt2d	chr15_98863561_98863590	GCCGTGATACCTCAGGCAG
sg056124	Gpd1	chr15_99718311_99718340	TGGAGCTCACCACATTGGG
sg096968	Gpd1	chr15_99718312_99718341	TTGGAGCTCACCACATTGG
sg056123	Gpd1	chr15_99719171_99719200	ATGGGGTACCACAAAAACC
sg014805	Gpd1	chr15_99720615_99720644	CCCAACTTTCGCATCACTG
sg096969	Gpd1	chr15_99721979_99722008	GGTGACAACACCAAGGCGG
sg014806	Gpd1	chr15_99722025_99722054	CTGCAGAAGAGCTTGGCGA
sg063091	Myh11	chr16_14201057_14201086	CATGACAGAGAGAAACAGG
sg103960	Myh11	chr16_14220199_14220228	GATGCAAAAGATCAAGGAG
sg103959	Myh11	chr16_14223580_14223609	AAAATCTTCTTCCGAACGG
sg021757	Myh11	chr16_14226483_14226512	CAGCGCACAAAGTTAGGCG
sg021758	Myh11	chr16_14233587_14233616	GGCCTTGGACAAGACCCAT
sg063090	Myh11	chr16_14246715_14246744	CTGCTACTTACAAAGCGAG
sg092426	Efcab1	chr16_14916900_14916929	AATACATTACGATCTAGTC
sg010345	Efcab1	chr16_14916963_14916992	ATGACATGATTATGGACAG
sg051640	Efcab1	chr16_14917673_14917702	CTGTATAAGCGTATCAGAG
sg092425	Efcab1	chr16_14920323_14920352	GATGGCTTCATTTCAAAGG
sg051641	Efcab1	chr16_14920374_14920403	CTCAAGCAGCCCTCTGAGG
sg010346	Efcab1	chr16_14920850_14920879	TCAGGCAGGCAAGGCCCAA
sg066780	P2rx6	chr16_17562113_17562142	TAACCAGGAACTGTCGGGT
sg107646	P2rx6	chr16_17565006_17565035	GTCCAGGGCAGATGTCCAG
sg107645	P2rx6	chr16_17567443_17567472	CAGCCCAGCAGTTAGCCAG
sg026007	P2rx6	chr16_17567870_17567899	TCTTGGCCTGAGCTAGCAG
sg066781	P2rx6	chr16_17570562_17570591	ATCACAGTGGGCACAGGAG
sg026008	P2rx6	chr16_17570795_17570824	TGGAGAACCAAATATGAAG
sg089149	Cldn5	chr16_18777099_18777128	CTGCGCCGTCACGATGTTG
sg089148	Cldn5	chr16_18777139_18777168	GGGCTGTGGATGTCGTGCG
sg007092	Cldn5	chr16_18777281_18777310	GTGCACTGAGCGCCGGTCA
sg048380	Cldn5	chr16_18777338_18777367	CACGGGTAGCACTCACGGG
sg048379	Cldn5	chr16_18777352_18777381	ACGGGAGGAGCGCTTTACG
sg007093	Cldn5	chr16_18777497_18777526	CCGCACATGAGCAGTGCGG
sg083979	Adipoq	chr16_23155257_23155286	CGTCATCTTCGGCATGACT
sg083978	Adipoq	chr16_23157123_23157152	GGGTTCCGGGGAAGCCCCG
sg043231	Adipoq	chr16_23157172_23157201	GCTGAGCGATACACATAAG
sg001970	Adipoq	chr16_23157271_23157300	ACCAACAGAATCATTATGA
sg001971	Adipoq	chr16_23157374_23157403	GGCCTTGTCCTTCTTGAAG
sg043232	Adipoq	chr16_23157459_23157488	GTGCTCCTCCATCTGGAGG
sg102361	Masp1	chr16_23485621_23485650	ACAACTCAGGAGAGAACCG
sg020152	Masp1	chr16_23491923_23491952	TAATGTAGTCATAGGGACA
sg061491	Masp1	chr16_23492080_23492109	CGGCAATCTCTTTACCCAG
sg102362	Masp1	chr16_23494614_23494643	CAGACAACAGGACCTGCCG
sg020153	Masp1	chr16_23513897_23513926	GAATATTACTGTCCCGGAG
sg061492	Masp1	chr16_23514013_23514042	CTGTGCCTCGCCCTGCCGG
sg118968	Trp63	chr16_25820467_25820496	CGTCACGCTATTCTGTGCG
sg078131	Trp63	chr16_25866178_25866207	ACAGCGCAAAGAACGGCGA
sg037394	Trp63	chr16_25876657_25876686	GTGTCGGAGCTTCTCCCCG
sg118969	Trp63	chr16_25876982_25877011	TCACAGACAAGCACAGTCG
sg037395	Trp63	chr16_25886238_25886267	GGACTATTTCACGACCCAG
sg078132	Trp63	chr16_25889143_25889172	TGGGCTCCAGTGAGACCCG
sg003707	Atp13a5	chr16_29297370_29297399	GTCAGTACCCGTTTCAGAG
sg085724	Atp13a5	chr16_29310726_29310755	TCCTACCAGTTGCCAGCGG
sg003708	Atp13a5	chr16_29314502_29314531	CACTTTGTCGAAGCACACG
sg044974	Atp13a5	chr16_29339053_29339082	GGGCCCAACTCGATCGAGG
sg085723	Atp13a5	chr16_29339056_29339085	TGTGGGCCCAACTCGATCG
sg044973	Atp13a5	chr16_29349031_29349060	CTTATAGGAAACTTCAGTG
sg044272	Apod	chr16_31297423_31297452	GGTAGGTTATTGTTTCTGG
sg085022	Apod	chr16_31297549_31297578	GGATCCAGTAGGGTGCCGG
sg003006	Apod	chr16_31303402_31303431	AGTGCTAAACAAGGAGCTG
sg003005	Apod	chr16_31303410_31303439	AACATCGAAGTGCTAAACA
sg044271	Apod	chr16_31303440_31303469	CAAGCCAACTACTCGCTGA
sg085021	Apod	chr16_31311024_31311053	CAAAATTCTCTTGCACAGG
sg030623	Ropn1	chr16_34666710_34666739	AAGCAAGTATGCATCCCAC
sg071381	Ropn1	chr16_34669898_34669927	ATTTCGGAGCCATGTCCCG
sg030622	Ropn1	chr16_34671148_34671177	AAGGTGCTGAATCTCCCCA
sg071382	Ropn1	chr16_34671157_34671186	CACTGTTAAACAGGTCCGT
sg112239	Ropn1	chr16_34671190_34671219	AACGTGGGTCGCTTCACAG
sg112240	Ropn1	chr16_34671230_34671259	CCAAGAGAGCTACAAGCAA
sg043142	Adcy5	chr16_35156225_35156254	CCGCGGGTTGATCCCCCGG
sg043143	Adcy5	chr16_35156333_35156362	ACGAAGACCCTCCACTAAG
sg001882	Adcy5	chr16_35156550_35156579	GCCCAGCTCCACCGAGCGG
sg083888	Adcy5	chr16_35156749_35156778	CGCTCTAAGAAGTTCCCGT
sg083889	Adcy5	chr16_35248825_35248854	GTGCACACACCCACAATGT
sg001881	Adcy5	chr16_35268967_35268996	TTACGGATTAAGATCCTCG
sg068569	Polq	chr16_37029347_37029376	ATAGCATAAACTAACAATG
sg027804	Polq	chr16_37040598_37040627	ATGATACGAGCTATTCTGG
sg109429	Polq	chr16_37060135_37060164	AATTGAAATGGGAGTACGG
sg027805	Polq	chr16_37060792_37060821	GCCCTCACTCCCTTTACAA
sg109430	Polq	chr16_37060887_37060916	CTGCTGCTAGAGACAGAAG
sg068570	Polq	chr16_37061870_37061899	GTGTCATTTCAGAAAGGAG
sg007900	Crebbp	chr16_4084696_4084725	ATAGTGCCAGCTTGGCCGG
sg049187	Crebbp	chr16_4093485_4093514	ATACTCGAGATATCCGATG
sg007899	Crebbp	chr16_4115785_4115814	GAACCTACTGAATCCAAGG
sg049188	Crebbp	chr16_4124732_4124761	AGAACTAGAAGAAAAGCGG
sg089959	Crebbp	chr16_4125700_4125729	GCTCTGAAAGATCGCCGCA
sg089958	Crebbp	chr16_4179603_4179632	AATGAATCAGGCTCAACAA
sg045166	Au021092	chr16_5212604_5212633	CATTCTGAGAAGAGTGCGA
sg085916	Au021092	chr16_5215999_5216028	GTGGGGTAAGCGTATCCAA
sg003899	Au021092	chr16_5216794_5216823	TGCAGAACCCTTATGACCA
sg085915	Au021092	chr16_5217790_5217819	GGTGCAACTACTAGGAACA
sg003900	Au021092	chr16_5217837_5217866	CCTCTGAGAAAGAGTCCAG
sg045165	Au021092	chr16_5220426_5220455	CCCTTTCAGTGCAACTCCG
sg001431	Abi3bp	chr16_56586950_56586979	CACTAACGATCATTAAGCA
sg042691	Abi3bp	chr16_56594491_56594520	GTGTCTAAAGCACTAGACA
sg083435	Abi3bp	chr16_56596751_56596780	TCTAATATAGCTTCAAGTG
sg083436	Abi3bp	chr16_56651305_56651334	CAACTCTAAAGGTGACAGG
sg042692	Abi3bp	chr16_56660187_56660216	CTGATAAAACCAAACCCAG
sg001432	Abi3bp	chr16_56668350_56668379	TCCCGGTGACATTATTCGG
sg030607	Robo2	chr16_73898914_73898943	AAAGCCCCACACAAACAAG
sg030606	Robo2	chr16_73904429_73904458	CCACGAAAAAACATAAGGG
sg112224	Robo2	chr16_73904458_73904487	TGCCCAGAATCAAAGCCAG
sg071365	Robo2	chr16_73956604_73956633	TTCCATATCAATAAAACGG
sg112223	Robo2	chr16_73978490_73978519	GCCAGCTAATTACAGGCAG
sg071366	Robo2	chr16_74035078_74035107	AGGAGGCCAATTAACCAGG
sg083831	Adamts5	chr16_85868621_85868650	GGGTTATTACAATGGCGGT
sg043086	Adamts5	chr16_85868651_85868680	AGTGTTCTCGCTCATGCGG
sg043085	Adamts5	chr16_85899204_85899233	CACCAACATAACCAGCTAG
sg001825	Adamts5	chr16_85899671_85899700	TGCATGTCTACAACCGCGA
sg001826	Adamts5	chr16_85899865_85899894	GTAGAAACAGTGACCCCGG
sg083830	Adamts5	chr16_85899978_85900007	GTGGGCTACCTTGTCTACG
sg097293	Grik1	chr16_87914244_87914273	TAGGAGTGGAAAATATCGG
sg015116	Grik1	chr16_87946743_87946772	CAGAGAGCTGACCTAGCAG
sg056443	Grik1	chr16_87995944_87995973	GTGCCATCGACATAAGCCA
sg015117	Grik1	chr16_88051516_88051545	GACTGTACAGCACTGACGG
sg097292	Grik1	chr16_88055997_88056026	AAACAGTTACCTCTTCGGG
sg056442	Grik1	chr16_88289586_88289615	ATCCTGAGCACTTGAGGGG
sg021105	Mrap	chr16_90738570_90738599	GTGAGCGGGACAGAGGCGT
sg021106	Mrap	chr16_90747520_90747549	AACCACAGGGCGATGACAA
sg103312	Mrap	chr16_90747553_90747582	AGAAAGAGGAGCACCACGA
sg062442	Mrap	chr16_90749237_90749266	TCCATGAACATATTGGCTG
sg103313	Mrap	chr16_90749300_90749329	GCCTCCCTGCAGACAACAG
sg062443	Mrap	chr16_90749332_90749361	GAGAGCTGGCACTGACCAG
sg017761	Kcne1	chr16_92348608_92348637	TATGTCATTGAAAACCAGG
sg099964	Kcne1	chr16_92348759_92348788	GTAACTCAGCATGATGCCC
sg017760	Kcne1	chr16_92348792_92348821	GAAGAAGCCCAGCACCATG
sg059098	Kcne1	chr16_92348818_92348847	CGAGATGACAGCAAGCTAG
sg059099	Kcne1	chr16_92348846_92348875	GAGCTGAGACTTACGAGCC
sg099965	Kcne1	chr16_92348916_92348945	AGAAAGGGCAGAACAGTCG
sg031083	Runx1	chr16_92644331_92644360	GGTCCCTACACTAGGACAT
sg031084	Runx1	chr16_92668766_92668795	TGTGGCGGATTTGTAAAGA
sg112698	Runx1	chr16_92689029_92689058	GAACTGAGAAATGCTACCG
sg071840	Runx1	chr16_92695561_92695590	GCGCACTAGCTCGCCAGGG
sg112699	Runx1	chr16_92696063_92696092	CTATTACAAACGGTCCCGG
sg071841	Runx1	chr16_92696809_92696838	TTCCTCCAACGTCGCCCGG
sg097307	Grin2a	chr16_9644127_9644156	CATGACCAAATTCAACCAG
sg056457	Grin2a	chr16_9657765_9657794	AACATCATCACCCAGACAG
sg097306	Grin2a	chr16_9669708_9669737	TCTTGACAAACTTCCGACA
sg015131	Grin2a	chr16_9761605_9761634	GTTCCCGGAGACCAAACTG
sg015130	Grin2a	chr16_9761635_9761664	GAAGAAATCGTAGCCGGTG
sg056456	Grin2a	chr16_9992250_9992279	GTGTGCGACCTCATGTCCG
sg073364	Slc22a3	chr17_12423786_12423815	TTCAGGCAAAAGCATCACG
sg032613	Slc22a3	chr17_12457537_12457566	CTCTCATCAAATTACTCAG
sg114217	Slc22a3	chr17_12458430_12458459	CCATTACCAGTAATAGAGG
sg032614	Slc22a3	chr17_12458521_12458550	GGAAGAATAATGATCCCGA
sg114218	Slc22a3	chr17_12458568_12458597	AGTTGGTTCAAAACAAAGG
sg073363	Slc22a3	chr17_12506961_12506990	GGACACCAGAGGCGCGGAG
sg050100	Dact2	chr17_14195838_14195867	CTGGCAATAGGCAGTGCAG
sg050099	Dact2	chr17_14196445_14196474	AGTTAGTGAGAAAGTCCCG
sg090873	Dact2	chr17_14196684_14196713	TATTGTCTCCATGGACACA
sg008807	Dact2	chr17_14197070_14197099	GAGCAGATGTCAAAACACG
sg090874	Dact2	chr17_14198028_14198057	CTGCAAACAGATGCGCAGG
sg008808	Dact2	chr17_14203669_14203698	TCGCGCGCCCACCCTGCGG
sg074975	Srrm2	chr17_23815272_23815301	CTGAGGCTTCCCCAACCCG
sg115828	Srrm2	chr17_23815902_23815931	CTAGAACACCAGCTCGCAG
sg074976	Srrm2	chr17_23818037_23818066	TCATTCCTTAATCAAACAG
sg034232	Srrm2	chr17_23819941_23819970	AACATCTCCAGTCACCCGG
sg115827	Srrm2	chr17_23820097_23820126	AGTACGAGACCTAGAACGG
sg034231	Srrm2	chr17_23820390_23820419	CTGTGCTACAGCAAACAGG
sg078206	Tsc2	chr17_24602207_24602236	CATTGGACAGCTCTTGCAG
sg119043	Tsc2	chr17_24603205_24603234	TCTCTGGGACCACAGACGG
sg037469	Tsc2	chr17_24604387_24604416	TGATCCTAGCACACATGTG
sg078205	Tsc2	chr17_24607749_24607778	GAACCACATGGCTATGACG
sg037468	Tsc2	chr17_24610538_24610567	AGCTCCAAAGACCCTTGAG
sg119042	Tsc2	chr17_24626289_24626318	ACAGGGTGATAATGAACAG
sg033904	Spdef	chr17_27718050_27718079	GCAGTACATCCCCACCCAA
sg074649	Spdef	chr17_27719957_27719986	AGCTTCTGAACATCACAGC
sg115502	Spdef	chr17_27719985_27720014	GTCCTGAAAGATATTGAGA
sg033903	Spdef	chr17_27720018_27720047	CTAGAGCAGGTGCAATCGA
sg074648	Spdef	chr17_27720053_27720082	TCATCCAACGTGCTCCCAG
sg115501	Spdef	chr17_27720147_27720176	TATCCCGACGATAGCAGCT
sg027098	Pi16	chr17_29319225_29319254	CGGCGGCAACATCACCCAC
sg108724	Pi16	chr17_29319310_29319339	GACGAGAAGCAAACTATGG
sg108725	Pi16	chr17_29326286_29326315	GGCCGTAAGCCCTACCAGG
sg027097	Pi16	chr17_29327137_29327166	CTGGCCCTTCATCCACCGA
sg067864	Pi16	chr17_29327299_29327328	GTACCCCAAATCCAGGAGG
sg067865	Pi16	chr17_29327425_29327454	CCCAAGGCCGAGTCGCCAG
sg050890	Dnah8	chr17_30686481_30686510	GACATGCTGACCCTCAACG
sg050891	Dnah8	chr17_30693991_30694020	CGTCGTCGATTCAAAGTCG
sg091673	Dnah8	chr17_30708298_30708327	AAGTTAGCCTTATCGATCG
sg009598	Dnah8	chr17_30736045_30736074	GTCGGTCACCGACTTCGAG
sg009597	Dnah8	chr17_30744588_30744617	TACGCGGAACTGCAATCCG
sg091672	Dnah8	chr17_30761055_30761084	ATTCAACGAGATCATCCGA
sg077626	Tnxb	chr17_34670603_34670632	GAAGTGTCACATTAGACCG
sg118465	Tnxb	chr17_34671076_34671105	CAGGTCAAAGACACCGTGG
sg036888	Tnxb	chr17_34671889_34671918	CCCGGGCCAGCACACGCAG
sg118464	Tnxb	chr17_34672075_34672104	CCCAGGCCAGCACACGCAG
sg077627	Tnxb	chr17_34692373_34692402	CTCAGGGACAGTCCACAGG
sg036889	Tnxb	chr17_34715935_34715964	GTGGCGTGTCCCTTCACGG
sg008101	Csnk2b	chr17_35117839_35117868	GGGCAGTAGAGTTTCACCA
sg049389	Csnk2b	chr17_35118446_35118475	AGGCATCGCACAAATGGTG
sg090160	Csnk2b	chr17_35119753_35119782	CTGGACATGATCTTAGACC
sg090161	Csnk2b	chr17_35119828_35119857	GTGGATGAAGACTACATCC
sg049390	Csnk2b	chr17_35120491_35120520	AAGATGAGTAGCTCTGAGG
sg008102	Csnk2b	chr17_35121303_35121332	CATCTCCCGGCGTCCACGG
sg032683	Slc25a27	chr17_43653354_43653383	CAGCGCTTGTGAACATGGG
sg114286	Slc25a27	chr17_43664073_43664102	CTACGTGTCTGTAAATGGC
sg114287	Slc25a27	chr17_43664101_43664130	GGAAGGCTTCCTAAAGCTG
sg073432	Slc25a27	chr17_43664121_43664150	GCCCTGGGAATTGTTCAGG
sg073433	Slc25a27	chr17_43664153_43664182	CGCACCATGCCCCTATAAG
sg032684	Slc25a27	chr17_43666932_43666961	GTAGGAACTTGCTCGTCCG
sg005199	Capn11	chr17_45630581_45630610	GCTGCAAATAACCATGTGG
sg087235	Capn11	chr17_45638726_45638755	AACTGGAGACATGCTCGAG
sg046475	Capn11	chr17_45642561_45642590	GTTTGGAAGATTTCACAGG
sg087236	Capn11	chr17_45642858_45642887	CAGAAATCCTGGCGATGGG
sg005198	Capn11	chr17_45653505_45653534	GCAGAATATCTACTGGCAG
sg046474	Capn11	chr17_45653636_45653665	TATAAGAATCAGAACTATG
sg009497	Dlk2	chr17_46298630_46298659	GCACACGAGATTTAGGCAG
sg091572	Dlk2	chr17_46301685_46301714	GCCAGTGTGTGTATGACGG
sg050791	Dlk2	chr17_46301744_46301773	GGACGTGGCTGTGAGCGCA
sg091573	Dlk2	chr17_46302395_46302424	GAAGTTGAGGGCAAAACCC
sg009498	Dlk2	chr17_46302422_46302451	CATGAATCCTGCCAAGCAG
sg050790	Dlk2	chr17_46302470_46302499	TGTGGACGACTGTCTGATG
sg044530	Arid1b	chr17_5097678_5097707	CAGTACCTGCAGCCGGCGG
sg017794	Kcnh8	chr17_52803513_52803542	CTGACCGTTGTGCTCCGAG
sg059132	Kcnh8	chr17_52834678_52834707	TATGCTTTCAATGTCACAG
sg099998	Kcnh8	chr17_52877939_52877968	ATCCGAAGTGCCTATATTG
sg017795	Kcnh8	chr17_52894035_52894064	GCCCCAGCAACTCAAGCAG
sg099999	Kcnh8	chr17_52898520_52898549	CGGCTGGCACATTCGAACA
sg059133	Kcnh8	chr17_52898529_52898558	TGTTCGAATGTGCCAGCCG
sg044529	Arid1b	chr17_5290966_5290995	AGAACCCCAACATATAGCG
sg085280	Arid1b	chr17_5321383_5321412	GAGTGCAAAACTGAGCGCG
sg085279	Arid1b	chr17_5327775_5327804	ATGCCCTATGAACCCAACA
sg003263	Arid1b	chr17_5336725_5336754	TCTGAGGTGGGATTCCGTG
sg003264	Arid1b	chr17_5342502_5342531	ATGGTGTGCCCGTCCGCAG
sg068333	Plin4	chr17_56102177_56102206	AAGGCCATACAGCTTGCAG
sg068332	Plin4	chr17_56104466_56104495	CTGGACACTACCAAATCTG
sg027566	Plin4	chr17_56104742_56104771	CTCATTGGTACGAAGGACA
sg027567	Plin4	chr17_56106979_56107008	GGGCTGTGAATGTGGCTAA
sg109193	Plin4	chr17_56106998_56107027	GTGGCCACAGGACTTGCAG
sg109192	Plin4	chr17_56107225_56107254	GCCTCCTTAGTTCCGACAA
sg019258	Lonp1	chr17_56615047_56615076	TGTGGAGACATCTTTGAGG
sg019257	Lonp1	chr17_56620528_56620557	AAGGCGATGATATCCCGAA
sg101471	Lonp1	chr17_56622453_56622482	CATTCGCAACTTGTCTCCG
sg101470	Lonp1	chr17_56626473_56626502	CGCTTTATCAAGATCGTGG
sg060600	Lonp1	chr17_56626625_56626654	GCAGCGACGAGACCTCCGA
sg060601	Lonp1	chr17_56626781_56626810	CGCTGCTGGCTGTCACCGG
sg063206	Myom1	chr17_71023160_71023189	TAGCCGTAATCATATGCAG
sg104075	Myom1	chr17_71037353_71037382	AAACATACCACGTGAGCCG
sg104076	Myom1	chr17_71045758_71045787	CATGGAAACCCCACCACGG
sg063207	Myom1	chr17_71077360_71077389	TCCTGCTGAATTTGAGCAG
sg021873	Myom1	chr17_71082222_71082251	CAGGCGTATCACTCAGTTG
sg021874	Myom1	chr17_71084347_71084376	TATGTGAACTATCGTGAGG
sg086549	Birc6	chr17_74565955_74565984	AGCTGCTGCAACCAAACGT
sg045790	Birc6	chr17_74599349_74599378	CACACCAACCTAATGCACA
sg004518	Birc6	chr17_74623846_74623875	GTTTCCAGCAGCTGAGCGG
sg045791	Birc6	chr17_74640177_74640206	ATGAAGAAAAAGTCTCAGG
sg004517	Birc6	chr17_74642514_74642543	AATATGGTTACCAGTACAA
sg086550	Birc6	chr17_74668868_74668897	ACAAGCCTTAACTAAACAG
sg038644	Vit	chr17_78601876_78601905	CTTCGGAGCCAGTGCCGCA
sg079379	Vit	chr17_78605537_78605566	TACTGAACAACACCCACGA
sg120213	Vit	chr17_78619621_78619650	TAGAGAAAATTACCCAGAG
sg120214	Vit	chr17_78619624_78619653	AGAAAATTACCCAGAGAGG
sg038643	Vit	chr17_78622795_78622824	TTCTTCATCACCGTCGAAG
sg079380	Vit	chr17_78624791_78624820	CGCAGACCCGCTTCACCAG
sg101251	Lhcgr	chr17_88742901_88742930	ACCAGTCGTTATAAACTGA
sg060380	Lhcgr	chr17_88753776_88753805	TGGCTAGGGTAGGTCAGCG
sg019037	Lhcgr	chr17_88765013_88765042	ATACATAACCACCATACCA
sg019038	Lhcgr	chr17_88767284_88767313	ACCGGGTTCAATGTATAGC
sg101252	Lhcgr	chr17_88791788_88791817	CTGTACTCACAGTCGGGCG
sg060381	Lhcgr	chr17_88791841_88791870	CATCCGGCGCGCAGTCGCA
sg064414	Nrxn1	chr17_90059519_90059548	TCACTGGGACACTCTGCCG
sg105279	Nrxn1	chr17_90643075_90643104	TGATCCCATGTCTAAGAGG
sg064413	Nrxn1	chr17_90704327_90704356	TATTCAGATCCCTTGAACG
sg023083	Nrxn1	chr17_91088082_91088111	ACGAGCCTCCCAACAGCGG
sg023082	Nrxn1	chr17_91088085_91088114	ACGACGAGCCTCCCAACAG
sg105278	Nrxn1	chr17_91088317_91088346	CTCTACATCGACCGCGCCG
sg088961	Chst9	chr18_15452729_15452758	CGGAGACTAATCTTTCCAT
sg048197	Chst9	chr18_15452857_15452886	TGGGAGATATTGTATGCAG
sg006910	Chst9	chr18_15453084_15453113	TTTGGTCCAAGGCAACAAA
sg088962	Chst9	chr18_15453137_15453166	GTGGCCAGTCCATCTGGAT
sg048196	Chst9	chr18_15453245_15453274	AACCTAGGGAGTCCAACAA
sg006911	Chst9	chr18_15453277_15453306	AAGATCTGAAGAAGAAAGG
sg092026	Dsg1c	chr18_20274597_20274626	TCACGGCTTCATAATCTAG
sg009949	Dsg1c	chr18_20274789_20274818	ATGGAAGCAAATCACACAG
sg092027	Dsg1c	chr18_20276965_20276994	AGAGTCACAGGTTTCTCAG
sg051243	Dsg1c	chr18_20279322_20279351	TAGCACTTACACCAGGCTG
sg051244	Dsg1c	chr18_20283275_20283304	TTGGTTCAGTGCTCTGAGG
sg009950	Dsg1c	chr18_20283763_20283792	GCACTTGATAACTCAGGGG
sg092022	Dsg1a	chr18_20331640_20331669	ATGGAAGCAAATCACAGAG
sg009945	Dsg1a	chr18_20333539_20333568	TAACTGGTTCAGAAAGTGG
sg051240	Dsg1a	chr18_20333641_20333670	GCGTCACAGGATCATGGGG
sg051239	Dsg1a	chr18_20333725_20333754	ACGTTGTCTCCATAGAGAG
sg092023	Dsg1a	chr18_20340292_20340321	GTGGGTGTCCACTACCCAG
sg009946	Dsg1a	chr18_20340572_20340601	AGATACCTGACTTAAGAGG
sg009948	Dsg1b	chr18_20388890_20388919	CAAGTGGCACTCCATCAGA
sg092024	Dsg1b	chr18_20391931_20391960	GAGCTTAGAGTCAGAGTGA
sg051241	Dsg1b	chr18_20397412_20397441	CTGTGTTAAATGTCATCGA
sg009947	Dsg1b	chr18_20399510_20399539	AGTTAACAACACTCCCGGT
sg092025	Dsg1b	chr18_20404894_20404923	ACTTAGCACTTACATCGTG
sg051242	Dsg1b	chr18_20408867_20408896	GTGGATATCCACTACCCAG
sg046853	Ccdc178	chr18_22019076_22019105	AAGAAATAGAGATAGCGAG
sg005572	Ccdc178	chr18_22023028_22023057	CTGAAAGAGTTAGAAGCCG
sg046852	Ccdc178	chr18_22024744_22024773	ACCTGAATCTCAATCCCTG
sg005571	Ccdc178	chr18_22033623_22033652	CTAAAACAGCTCTACAAGC
sg087615	Ccdc178	chr18_22097738_22097767	CTCAATTGAAGTTGTGTAG
sg087616	Ccdc178	chr18_22109826_22109855	GAAGACATTGCCCTTAAGG
sg014912	Gpr17	chr18_31947228_31947257	AAGCACATAGACTGAACGG
sg097084	Gpr17	chr18_31947592_31947621	GACTTGACAGGGTGCACAA
sg056236	Gpr17	chr18_31947730_31947759	GAGAAGTGATAAACCAACC
sg097085	Gpr17	chr18_31947832_31947861	TCCCATATGAAAAGCCACA
sg014911	Gpr17	chr18_31947858_31947887	AGCATTGCCCACAAAAGCG
sg056237	Gpr17	chr18_31947914_31947943	TGCGGACAAGAGACCCCCC
sg037511	Tslp	chr18_32815574_32815603	TAGTACTTGCAGGATGAAG
sg037510	Tslp	chr18_32815592_32815621	GCAAGTACTAGTACGGATG
sg119084	Tslp	chr18_32816449_32816478	GCTAAGTTCGAGCAAATCG
sg119085	Tslp	chr18_32816867_32816896	GAATCAACCCACAGGAGGG
sg078248	Tslp	chr18_32816895_32816924	TCCAGAGTCAGTTGAGAAG
sg078247	Tslp	chr18_32817087_32817116	ATACTCTCAATCCTATCCC
sg002936	Apc	chr18_34289859_34289888	TGCCGGCCAGCTTCATGGG
sg044201	Apc	chr18_34304640_34304669	TCTTAAAGTAACACTGTAG
sg002935	Apc	chr18_34314954_34314983	CTTCTACACAGTACACCCG
sg084952	Apc	chr18_34315182_34315211	CTGGATGACAACAAAGCAG
sg084951	Apc	chr18_34315577_34315606	TCACTACACCCCTATTGAG
sg044202	Apc	chr18_34316282_34316311	TGATTTGAAAGATCTACAG
sg064376	Nrg2	chr18_36021929_36021958	TACAGACCACGTGATCCGG
sg023045	Nrg2	chr18_36045846_36045875	ACTCCATGTCAACAGCGGT
sg105240	Nrg2	chr18_36052796_36052825	GATGCGAATATCACGACTC
sg064375	Nrg2	chr18_36196471_36196500	TTGCCGTTAGGGTCGACCG
sg105241	Nrg2	chr18_36196690_36196719	GAGCTGGAACCGCCTGCCG
sg023044	Nrg2	chr18_36196840_36196869	TCGCGCCTCATGCCGCCGG
sg006336	Cdo1	chr18_46715656_46715685	TGTTCTCTGGTCAAAGGCG
sg088384	Cdo1	chr18_46720395_46720424	CAGCAGCTTCAGAAAGCAG
sg047618	Cdo1	chr18_46727995_46728024	CGAGAGCAATCCCGCCGAG
sg006335	Cdo1	chr18_46728045_46728074	GCGGGGGACGAAGTCAACG
sg047619	Cdo1	chr18_46728060_46728089	TTACATGAGCTCTTCGCGG
sg088383	Cdo1	chr18_46728073_46728102	GAAGAGCTCATGTAAGATG
sg061015	Lvrn	chr18_46850220_46850249	CAGCAGCAGGGCCACCCCG
sg061014	Lvrn	chr18_46850433_46850462	AGACTTGGGACCTCCGTCG
sg101887	Lvrn	chr18_46850594_46850623	TGCAGCAACAATCTCGAGG
sg019671	Lvrn	chr18_46866462_46866491	CAAGGGCAACAAGGTACGT
sg019670	Lvrn	chr18_46881290_46881319	GTGCGTTGATAAACAAGTG
sg101888	Lvrn	chr18_46894584_46894613	CAGAGCAACGGCACTGCAG
sg032771	Slc27a6	chr18_58556574_58556603	GTGCGCTACGGAATTCAGA
sg032772	Slc27a6	chr18_58556672_58556701	AGCCTTCATCATTTATGAG
sg073521	Slc27a6	chr18_58572197_58572226	TCCAGAGGTAAAAATGTAG
sg114375	Slc27a6	chr18_58598536_58598565	TTCTCCTAACAGAGAGAAG
sg073520	Slc27a6	chr18_58598559_58598588	AACTGCCAAACGTACCCGA
sg114374	Slc27a6	chr18_58598654_58598683	AACTGTACGGAGCTACCGA
sg099173	Il17b	chr18_61690176_61690205	CAAAAGAAAAGGGCAAGGG
sg058308	Il17b	chr18_61690276_61690305	GAGTATGAGCGGAACCTTG
sg099172	Il17b	chr18_61690347_61690376	TGAAGTCAATCTACAGCTG
sg016973	Il17b	chr18_61690385_61690414	ACCTACCTGTAGCCCCATG
sg016974	Il17b	chr18_61692227_61692256	ATCCCTGCGGACTTGCCCG
sg058309	Il17b	chr18_61692399_61692428	CAGGTGCAACCCACAGCGA
sg043282	Adrb2	chr18_62178647_62178676	GGCAGAACGGACTACACAG
sg002021	Adrb2	chr18_62178708_62178737	TTTCGAAGAAGACCTGCGA
sg084028	Adrb2	chr18_62178966_62178995	GGAGGACCTTCGGAGTCCG
sg002020	Adrb2	chr18_62179184_62179213	GCTATCGATTGTTACACCG
sg084029	Adrb2	chr18_62179240_62179269	ATCTGGATAGGCAAAAAGG
sg043281	Adrb2	chr18_62179487_62179516	CTAGTCATGGGCCTAGCGG
sg088993	Cidea	chr18_67358747_67358776	CGAGCTGGATGTATGAGGG
sg088994	Cidea	chr18_67358795_67358824	ATGACCGAAGTAGCCGGCG
sg006943	Cidea	chr18_67358802_67358831	GCTGGCCATCACCCCACGC
sg006942	Cidea	chr18_67360221_67360250	AAGGGACAGAAATGGACAC
sg048228	Cidea	chr18_67366460_67366489	TTTGACATTGAGACAGCCG
sg048229	Cidea	chr18_67367372_67367401	CTGTTGCAGGAATCTGCTG
sg050210	Dcc	chr18_71378855_71378884	CAAAGGATAATAATCAACG
sg090987	Dcc	chr18_71456911_71456940	ACAGAAAGACTACCCGCAG
sg008918	Dcc	chr18_71810737_71810766	ACCTGGTTACGAGGCGAGG
sg090988	Dcc	chr18_71826174_71826203	ACCCATGCCAACAATACAC
sg050211	Dcc	chr18_71954804_71954833	GAAGGACTTTACCAATGCG
sg008919	Dcc	chr18_71954909_71954938	GACGGCCTTATCCTAGCCT
sg114884	Smad4	chr18_73640413_73640442	GAGAATGCACAATCGCCGG
sg074031	Smad4	chr18_73641869_73641898	CGGCAGATGCAGCAACAGG
sg114883	Smad4	chr18_73649777_73649806	AAAAGCGATCTCCTCCCGA
sg074030	Smad4	chr18_73662698_73662727	GTGGCGTTAGACTCTGCCG
sg033284	Smad4	chr18_73675783_73675812	GAATCCATATCACTATGAG
sg033283	Smad4	chr18_73677670_73677699	GTCACCATACAGAGAACAT
sg102278	Mapk4	chr18_73930676_73930705	CTGTGCAATCTCCAGAAAG
sg061408	Mapk4	chr18_73930756_73930785	CTGTCGCACTGGAAGCAGG
sg102277	Mapk4	chr18_73933987_73934016	AGCCCGTACTCGTGCCCCG
sg020069	Mapk4	chr18_73969879_73969908	AACATTACTCACACAAGGT
sg020068	Mapk4	chr18_73970043_73970072	ATACATGAACAGCTTGGCG
sg061407	Mapk4	chr18_73970166_73970195	CGAGGTGCTGGGACCCAAG
sg054756	Glyat	chr19_12639820_12639849	AATGTTGGAGAAATCCTTG
sg095553	Glyat	chr19_12646349_12646378	AAAAGCCCTAGTTGACAAG
sg095552	Glyat	chr19_12650259_12650288	TGTATCGTCTTATTCAGGT
sg013448	Glyat	chr19_12650329_12650358	TGTCTCTGATGATACATAG
sg054755	Glyat	chr19_12651269_12651298	AGCCAGAATTTATTCACCA
sg013449	Glyat	chr19_12651377_12651406	ATTAGAGTCCAAGATGCAG
sg119004	Trpm6	chr19_18786713_18786742	GAGTGCATACAGTTTAGCG
sg078167	Trpm6	chr19_18809529_18809558	ATTCTATAGCTCGAGAGAA
sg037430	Trpm6	chr19_18813399_18813428	AGCCTGTCAGAGGAACCCG
sg037431	Trpm6	chr19_18832559_18832588	GATTCAGCAGGATAAAGGG
sg119005	Trpm6	chr19_18853618_18853647	GGCTCCTCAGCAAAGAAGG
sg078168	Trpm6	chr19_18854222_18854251	GAGTCACTATTGCAAGTGG
sg078162	Trpm3	chr19_22715279_22715308	GAGGGAAGATATGTACCAT
sg118998	Trpm3	chr19_22715294_22715323	CCATAGGTATCGCCCCCTG
sg037425	Trpm3	chr19_22733039_22733068	GAGTGCATGCTATTGAGAA
sg118999	Trpm3	chr19_22733116_22733145	GTGAAACTCCGCAGACAAC
sg078161	Trpm3	chr19_22793374_22793403	TGGGTTCGAGTGTACGTGA
sg037424	Trpm3	chr19_22910098_22910127	GGCACCGGCTAATCCCCGT
sg019912	Mamdc2	chr19_23350827_23350856	TGGGATGTAAACTTAGTGT
sg102121	Mamdc2	chr19_23353379_23353408	GTCTTGATAAAAGTTGCAG
sg061251	Mamdc2	chr19_23359199_23359228	CTTTCAATGGTCCCAAAGG
sg019913	Mamdc2	chr19_23363698_23363727	CTCCTTACCCCATGGAGGT
sg102122	Mamdc2	chr19_23363835_23363864	CTATTACCAGCTTCAGCAG
sg061252	Mamdc2	chr19_23378793_23378822	GGTCTGACACAGATCCCGG
sg011547	Fam189a2	chr19_23975600_23975629	TGCAACGCAGACAGAAAGG
sg093639	Fam189a2	chr19_23978083_23978112	GGGCTCTTACTAACACGAC
sg052845	Fam189a2	chr19_23984692_23984721	GACATAGGAGTTATACCTG
sg052846	Fam189a2	chr19_23984739_23984768	ATGTGGCAAAGTAAGAAGG
sg011546	Fam189a2	chr19_23994773_23994802	AGCTTACCAGATCACACCT
sg093640	Fam189a2	chr19_24030777_24030806	GAGGCTGCAGAGCACCCCG
sg067717	Pgm5	chr19_24750423_24750452	AAGAATCTCCATCCAGCAG
sg067716	Pgm5	chr19_24750437_24750466	AGCAGGGGTCTCATACACG
sg026950	Pgm5	chr19_24820186_24820215	AAAGTCAAAGATATTCCGG
sg108579	Pgm5	chr19_24820210_24820239	GTTGAGATAGATGTCAACG
sg108580	Pgm5	chr19_24834843_24834872	ATAATGCAGGAGACTGCAG
sg026949	Pgm5	chr19_24861609_24861638	GCAACCCTGACGGTCGCGC
sg017069	Il33	chr19_29949701_29949730	GTGCTGCTGAACTTTGCCG
sg058406	Il33	chr19_29952755_29952784	ATCTCTTCCTAGAATCCCG
sg099271	Il33	chr19_29954567_29954596	TTGGTCATTGTATGTACTC
sg099270	Il33	chr19_29955195_29955224	ATAGTAGCGTAGTAGCACC
sg058407	Il33	chr19_29958864_29958893	CGAAGAAGGCCTGTTCCGG
sg017070	Il33	chr19_29958969_29958998	AACCAGCTGGCTCTAGTGG
sg028965	Pten	chr19_32799886_32799915	GTTTGATAAGTTCTAGCTG
sg110587	Pten	chr19_32800013_32800042	GTGCATATTTATTGCATCG
sg069728	Pten	chr19_32811807_32811836	CTATTCCAATGTTCAGTGG
sg028966	Pten	chr19_32815459_32815488	CTCCAATTCAGGACCCACG
sg069729	Pten	chr19_32815462_32815491	CAATTCAGGACCCACGCGG
sg110588	Pten	chr19_32819869_32819898	GAGGAGCCATCAAATCCAG
sg114112	Slc16a12	chr19_34670647_34670676	CAGACCTGGCTTTAGGCAG
sg073257	Slc16a12	chr19_34672491_34672520	AGTGCTGAAGACAAAGAGG
sg114111	Slc16a12	chr19_34674841_34674870	AACAATATCGATTACCCCG
sg073256	Slc16a12	chr19_34675225_34675254	CCAGGAAAACTGTTCGATG
sg032505	Slc16a12	chr19_34677278_34677307	CTTACCTGTAAGAACTCCC
sg032506	Slc16a12	chr19_34677374_34677403	CCAGTTATCCTGTCAAGCG
sg029827	Rbp4	chr19_38118329_38118358	CCTGAGCCCAGAGACACGG
sg111446	Rbp4	chr19_38118426_38118455	CAGGAGTACTGCAGAGCGA
sg029826	Rbp4	chr19_38124288_38124317	GGGACGAGTCCGTCTTCTG
sg111445	Rbp4	chr19_38124375_38124404	TTGCAAAAAGAGACCCTCG
sg070587	Rbp4	chr19_38124383_38124412	ATCGCCAAAAAGGACCCCG
sg070586	Rbp4	chr19_38124507_38124536	ACTTCGACAAGGCTCGTGT
sg074432	Sorbs1	chr19_40321908_40321937	CTTAAGCGCGAGCAAGAAG
sg033685	Sorbs1	chr19_40361455_40361484	GCTCGGGGAATTTGTACGT
sg115285	Sorbs1	chr19_40363194_40363223	AGATCCACAAACTGAACAG
sg115284	Sorbs1	chr19_40373563_40373592	TTGGGAATCGGTTTCAATG
sg033686	Sorbs1	chr19_40376822_40376851	AAATCATCGAGTGTCGGGA
sg074431	Sorbs1	chr19_40376972_40377001	ACAACTATTACCTCAGACG
sg007972	Crtac1	chr19_42298287_42298316	TTCCCCGGAAGACAGACAG
sg090031	Crtac1	chr19_42318597_42318626	CTGGGGTCAGCAAGTACAC
sg049259	Crtac1	chr19_42323706_42323735	CTTACCGTCCTGTCTACAC
sg007971	Crtac1	chr19_42333966_42333995	CTCACCCTACTATGCTCTG
sg049260	Crtac1	chr19_42333998_42334027	CGGCTGGTGAATATTGCGG
sg090030	Crtac1	chr19_42413938_42413967	GGGGACTTCGAGATCGTTG
sg057689	Hpse2	chr19_42913129_42913158	TGGTGACCACCTCAGCTGG
sg098548	Hpse2	chr19_42913174_42913203	TGGTCAACACATACACTCC
sg057688	Hpse2	chr19_42991170_42991199	CTCTGGAGTAAACCCGGAT
sg016360	Hpse2	chr19_43294265_43294294	CTGGAGCTCCAGAGAGAGA
sg016359	Hpse2	chr19_43384773_43384802	AATCCGGCGAAAAGCCGCG
sg098547	Hpse2	chr19_43388037_43388066	AGCCATCATGAATGATGGA
sg100003	Kcnip2	chr19_45794034_45794063	AGATGGACAGAAACAAGGA
sg017799	Kcnip2	chr19_45794222_45794251	CCTCGGGGCCTCCTCCCGG
sg017798	Kcnip2	chr19_45795013_45795042	CCCAGCGGAATTGTCAACG
sg059137	Kcnip2	chr19_45795645_45795674	TTCCAGACCCTCAGGCCGG
sg059136	Kcnip2	chr19_45795665_45795694	GATGAGTTTGAACTATCCA
sg100002	Kcnip2	chr19_45815744_45815773	CCGAATCCCGAGATTTGGA
sg048795	Col17a1	chr19_47648843_47648872	CCGACATCGGCCCAGGCGG
sg089564	Col17a1	chr19_47654197_47654226	CAGAAGGTGTTGACTTACG
sg007507	Col17a1	chr19_47660811_47660840	CAGGGATGCCTGGAACCCG
sg048794	Col17a1	chr19_47665893_47665922	TTCACCACGAGGTCCCATG
sg089565	Col17a1	chr19_47668593_47668622	AGGGACCGCCTCCAGGCCG
sg007506	Col17a1	chr19_47679411_47679440	GAGGACGAAGCCAAACACG
sg056084	Gpam	chr19_55077891_55077920	CTGGCTGATCAGGTTGCCG
sg014765	Gpam	chr19_55079264_55079293	ATAGCGCAGGACTTGCTGG
sg056083	Gpam	chr19_55081418_55081447	GCTTGCTCCAGAGAAAGGG
sg096928	Gpam	chr19_55083336_55083365	AAGGCACCCGCTCCCGCAG
sg014766	Gpam	chr19_55087490_55087519	GCACCGGCAGAAACAAGAG
sg096929	Gpam	chr19_55088800_55088829	ATCATCCCTGGGGAGACGG
sg061820	Men1	chr19_6335734_6335763	ACAGCGCCGCGGATCTGAG
sg020483	Men1	chr19_6336828_6336857	GTGGTGTTTGGGCCCAACG
sg061821	Men1	chr19_6336880_6336909	AAGGCAACGAGGACCGCAG
sg102690	Men1	chr19_6337182_6337211	CGCTGCGACCGTAAGATGG
sg020482	Men1	chr19_6338397_6338426	CCTCACTCTTGGATAACAG
sg102691	Men1	chr19_6339900_6339929	TCCCAGGTACTACCCGCGG
sg029222	Pygm	chr19_6384657_6384686	GATCCAGCGTCCCACGAGG
sg110842	Pygm	chr19_6386056_6386085	TAGCGGATCCCATAGCCAT
sg110843	Pygm	chr19_6388124_6388153	AGGTGCCTTGGCCGACCAG
sg069983	Pygm	chr19_6388254_6388283	TAGCCGCCAACATTGACTG
sg029221	Pygm	chr19_6388801_6388830	CTTGGAGGACTTGAAACGT
sg069984	Pygm	chr19_6397624_6397653	TCATCGAACAGCTAAGCAG
sg073329	Slc22a12	chr19_6538739_6538768	CGGTAGGCAAGCTGGACCA
sg032579	Slc22a12	chr19_6540457_6540486	ATCACCAAAGGGCTACCCT
sg073330	Slc22a12	chr19_6542354_6542383	GTCACGATTGTGGACCTGA
sg114185	Slc22a12	chr19_6542533_6542562	CAGAAGAACATCGGGTCCA
sg114184	Slc22a12	chr19_6542577_6542606	AGGTGCTATTGTCCAGGAG
sg032580	Slc22a12	chr19_6542593_6542622	GAGAGGCACCCAACAGCGG
sg060341	Lgals12	chr19_7598111_7598140	GTTGGCACTCAATGGGCAG
sg101212	Lgals12	chr19_7602061_7602090	CTCAACAGCCATTTGTGGA
sg060340	Lgals12	chr19_7603062_7603091	GGTATCTACCCGTGACAGT
sg018997	Lgals12	chr19_7604031_7604060	CTGGCAAAAAGAGATCCGG
sg101211	Lgals12	chr19_7604093_7604122	GCTTGACAGTGTAGAATCG
sg018998	Lgals12	chr19_7604123_7604152	GGAAGGCAACATCTGGCTG
sg019564	Lrrn4cl	chr19_8851709_8851738	CAGGGTCAAGATCTGAGGT
sg060907	Lrrn4cl	chr19_8851776_8851805	CGCAACGGACAGCTAAGGA
sg060908	Lrrn4cl	chr19_8851790_8851819	GCAACGGTCATAGTCGCAA
sg101781	Lrrn4cl	chr19_8852007_8852036	CTGCTTTGGGAAAGCAACG
sg019563	Lrrn4cl	chr19_8852085_8852114	AAAGGACATAAGCAACCCC
sg101780	Lrrn4cl	chr19_8852116_8852145	TGGTGGCTGCTAATGACGC
sg058846	Itih2	chr2_10096484_10096513	AAGGAGCCGGGAAAACCCG
sg017507	Itih2	chr2_10106695_10106724	GGCTGTCCAATGAAAATCG
sg099710	Itih2	chr2_10109582_10109611	ACAGGCACGAATATCAACG
sg058845	Itih2	chr2_10117411_10117440	TGTGGATTATCGAACCCCA
sg099711	Itih2	chr2_10126190_10126219	CATCGAACACGACACTCTG
sg017508	Itih2	chr2_10130550_10130579	GATGTCCAGCAAAATGCAG
sg099717	Itih5	chr2_10190259_10190288	CAGAAGCTCTTCATAACTG
sg058851	Itih5	chr2_10206760_10206789	AATAACCATTCAGAACCTG
sg017513	Itih5	chr2_10238655_10238684	GGTGGGTTTCCCATCGGTG
sg058852	Itih5	chr2_10238824_10238853	ACGAGGCGTGTTCATGAGG
sg017514	Itih5	chr2_10240535_10240564	TGCGGATGTCAGAAAGAAG
sg099716	Itih5	chr2_10240565_10240594	CATGCTCTACTACGTCAGG
sg107785	Pamr1	chr2_102614866_102614895	AGACCCAGTGGTGTCAAGG
sg066920	Pamr1	chr2_102636181_102636210	GAACCGAAGATCTCAGACC
sg026148	Pamr1	chr2_102639230_102639259	TTCTGCTTGCTGAAAGCCG
sg107786	Pamr1	chr2_102639360_102639389	CCTGCTGCTTCCCAGGCGG
sg026147	Pamr1	chr2_102640724_102640753	GCAGGCAGCCATCTACCGG
sg066921	Pamr1	chr2_102642177_102642206	GGTATCATTCTTAAAGCCA
sg051899	Elf5	chr2_103430339_103430368	ATCGGTCCAAGGCATCAGG
sg010603	Elf5	chr2_103430349_103430378	TGCTGAACAGATCGGTCCA
sg051898	Elf5	chr2_103439199_103439228	GGGTGCACTGATGTCCAGT
sg092686	Elf5	chr2_103439310_103439339	TCTGTCACTTCAACATCAG
sg092685	Elf5	chr2_103442818_103442847	ATGCTGAAGAGACCAAGAC
sg010604	Elf5	chr2_103449572_103449601	TAAAACGGGAATTCTGGAG
sg004162	Bbox1	chr2_110270093_110270122	AGAGAATATGGAAAGCCTG
sg045431	Bbox1	chr2_110270164_110270193	TCAAGCAAACAGTCACAGG
sg086184	Bbox1	chr2_110275542_110275571	TTGAAGCTCACCTTACCCC
sg045430	Bbox1	chr2_110275614_110275643	AAGATTGATGCCAACAATG
sg086183	Bbox1	chr2_110292438_110292467	TGGTGAGATCATAAAACTT
sg004161	Bbox1	chr2_110292586_110292615	ACACAGAATGTCAGTACTG
sg084808	Ano3	chr2_110658241_110658270	TCGCCGTATGCGCTCACGG
sg044058	Ano3	chr2_110666457_110666486	TTTAACAAAGCCAATAGAG
sg002793	Ano3	chr2_110667805_110667834	CACGACACAAAATCAAAAG
sg044057	Ano3	chr2_110697469_110697498	GGTAATAAACCCCATCACG
sg002792	Ano3	chr2_110783681_110783710	ACTGTGCAAGTATGCAGAG
sg084807	Ano3	chr2_110884843_110884872	CTGCTGATAAGCCTGAACA
sg112746	Ryr3	chr2_112641023_112641052	GTAGAAGAGGCCAAAGCAG
sg031132	Ryr3	chr2_112649397_112649426	GAAGACAAAATCAAGGAGG
sg112747	Ryr3	chr2_112667829_112667858	GGATTGCCATTCTGAACGG
sg031131	Ryr3	chr2_112709214_112709243	GAGAAGCTAAAGAAGAAGG
sg071888	Ryr3	chr2_112750851_112750880	CGACAGGAAATACAGGCGG
sg071889	Ryr3	chr2_112833920_112833949	GTCACCACAAAGCAAGGGG
sg083780	Adam33	chr2_131053958_131053987	GTCGCGGCTATTGCCTAGA
sg001776	Adam33	chr2_131053976_131054005	TAGCCGCGACCCTCAGCGC
sg043035	Adam33	chr2_131054277_131054306	CCTCGCACAGCAATCACCG
sg083781	Adam33	chr2_131054303_131054332	AATTGCTCCCTGCGTGCGG
sg043036	Adam33	chr2_131054509_131054538	CAAGAAGCCGTTTCCGCAG
sg001775	Adam33	chr2_131055297_131055326	GTGGAGGGCATATGCCGCG
sg043898	Angpt4	chr2_151911428_151911457	AGATTCACCAGGTCCGGCG
sg043899	Angpt4	chr2_151911534_151911563	GGCAGGCAAGTCCCTCTGG
sg084648	Angpt4	chr2_151911564_151911593	GAGGCTGCACCTAACAGAC
sg084647	Angpt4	chr2_151925452_151925481	AACCAGACAACTACCATGC
sg002633	Angpt4	chr2_151934454_151934483	ACACCGCTGGTATTAACCC
sg002634	Angpt4	chr2_151936725_151936754	TGGAAGCGTAAATTTCCAG
sg009172	Defb22	chr2_152485967_152485996	CCAACCATTGCAGCAGTGC
sg091246	Defb22	chr2_152485997_152486026	TCACAGCAGGTGGGGACGA
sg050463	Defb22	chr2_152486005_152486034	TAATCTTGTCACAGCAGGT
sg091245	Defb22	chr2_152486045_152486074	AAATTAGTGGTCACTGTGG
sg050464	Defb22	chr2_152486057_152486086	TTCTGGACTTCAAAATTAG
sg009171	Defb22	chr2_152486093_152486122	CAACGAGCAAATGTCCCAT
sg044847	Asxl1	chr2_153357147_153357176	GAGTGTGAAAAGACTAATG
sg003582	Asxl1	chr2_153393459_153393488	CGGAAGCCTCTTAAGAGGG
sg085597	Asxl1	chr2_153393661_153393690	TGTTAACAAGAATGGACCC
sg085598	Asxl1	chr2_153397640_153397669	ACTAAAACCGACTTAGCAG
sg003581	Asxl1	chr2_153397892_153397921	ACTGACGATCTTCAAGCCG
sg044848	Asxl1	chr2_153399406_153399435	TACCACTGCAATCGAGAGA
sg051875	Eif6	chr2_155823254_155823283	TGTCTTCAGTAATCAGGGG
sg051874	Eif6	chr2_155823255_155823284	GTGTCTTCAGTAATCAGGG
sg010579	Eif6	chr2_155823857_155823886	GTCCACCCAGACTTGGACA
sg092662	Eif6	chr2_155823939_155823968	TGACTCCGTGCAGATACGG
sg010580	Eif6	chr2_155826332_155826361	AAGTTCTCTGAGCCTCCGA
sg092661	Eif6	chr2_155826348_155826377	ACAAACGCCTACTGCCTGG
sg109084	Plcg1	chr2_160731929_160731958	CTACTCCAAGAAGTCGCAG
sg068223	Plcg1	chr2_160731988_160732017	GCCAGATCACATGGAGCCG
sg027457	Plcg1	chr2_160751140_160751169	AGGACCTTGAACAGCGCAG
sg068224	Plcg1	chr2_160754611_160754640	CCAGGAAGGCCCCATCCCG
sg027456	Plcg1	chr2_160754896_160754925	CGCTACCCCATCAACGAGG
sg109083	Plcg1	chr2_160756619_160756648	ATGTGGAAAAGCAAGATGG
sg092784	Emilin3	chr2_160908950_160908979	GGAGCGCTAAGGAGGTCAG
sg010700	Emilin3	chr2_160909171_160909200	AAGCCTATAGGTACGACAG
sg051995	Emilin3	chr2_160909658_160909687	AGAGCCTCAGATTCCCTTG
sg010701	Emilin3	chr2_160912025_160912054	AGCCGCGGACGCCATCCGG
sg092783	Emilin3	chr2_160912030_160912059	CAGCCTCTACACCACCGGA
sg051996	Emilin3	chr2_160912144_160912173	CAGCCACACGGACAGACGG
sg110742	Ptprt	chr2_161530554_161530583	CTTTGTTTAGAAATGGGGG
sg029120	Ptprt	chr2_161534544_161534573	ATGGGACCATAACACCCGG
sg029119	Ptprt	chr2_161607373_161607402	CAGGGTCACAAGTCCGGTA
sg069882	Ptprt	chr2_161698005_161698034	AATGATGATGAACATGAGG
sg110741	Ptprt	chr2_161766370_161766399	AAAGTAGTGTAGCGAATCG
sg069881	Ptprt	chr2_162253823_162253852	CTGCGACTCCAAAACGTTG
sg113696	Sgk2	chr2_162993900_162993929	CAATGGGAACATCAACCTG
sg032088	Sgk2	chr2_162994672_162994701	CTACTGGCCAAGCGCAAGT
sg072842	Sgk2	chr2_162995792_162995821	TGCTTGACTATGTCAACGG
sg032087	Sgk2	chr2_162997903_162997932	AGAGAGTGAAGGTAACCAA
sg072841	Sgk2	chr2_163003298_163003327	GAGCCTTACGATCGAGCAG
sg113697	Sgk2	chr2_163004259_163004288	CCACAAGGACCAGAGGCAG
sg099833	Jph2	chr2_163341482_163341511	ATCGCCCGTACATTGGCCA
sg017629	Jph2	chr2_163341545_163341574	CATGCCAAAGCCAAGGCAG
sg017628	Jph2	chr2_163376156_163376185	TGAGCGCGAAACCACCGCG
sg058967	Jph2	chr2_163376204_163376233	GTGGCTCCGGACTCACCGG
sg099832	Jph2	chr2_163397197_163397226	ACAGTGGTGCCAAGTACGA
sg058966	Jph2	chr2_163397403_163397432	GGAGCCCGAGTATTCACCC
sg059081	Kcnb1	chr2_167104824_167104853	ATCCTCTTAGGAACAGAGG
sg099946	Kcnb1	chr2_167105527_167105556	ATCGAGATGATGGACATCG
sg017743	Kcnb1	chr2_167105811_167105840	GTAGCCCACCAGAAAGAGG
sg059080	Kcnb1	chr2_167188058_167188087	GAGAAGCCCAACTCATCGG
sg099947	Kcnb1	chr2_167188249_167188278	GCCAGGAGCTGGACTACTG
sg017742	Kcnb1	chr2_167188379_167188408	TGCGACGACTACAGCCTCG
sg037502	Tshz2	chr2_169633754_169633783	CAGCAGGCACCCAAGCGGG
sg119076	Tshz2	chr2_169883907_169883936	GTTGGATAACTTGAAGCCG
sg078240	Tshz2	chr2_169883951_169883980	GCGACACCCGCAACAGCAG
sg078239	Tshz2	chr2_169884910_169884939	GAACAAGGTGTGAAAAGCG
sg119077	Tshz2	chr2_169885330_169885359	AAGGAAAGTCCCCACGAAG
sg037503	Tshz2	chr2_169885662_169885691	CGGCTTGTCCACCACGTGG
sg026503	Pck1	chr2_173153499_173153528	CGCAGATGTGGATATACTC
sg108135	Pck1	chr2_173153520_173153549	ATCTGCGATGGCTCCGAGG
sg026504	Pck1	chr2_173154045_173154074	GTCCTCTTCCGACATCCAG
sg108134	Pck1	chr2_173155941_173155970	TGGGCATAACTAACCCCGA
sg067270	Pck1	chr2_173157028_173157057	TGGCCGAGACTAGCGATGG
sg067271	Pck1	chr2_173157101_173157130	CTCCTGGAAGAACAAGGAG
sg051607	Edn3	chr2_174761000_174761029	TCCCGCTTACCTGCAGCGG
sg010312	Edn3	chr2_174761572_174761601	CTGAAGCTGGATCAGAGAG
sg092392	Edn3	chr2_174761629_174761658	GCAGGCAGTGCAACTGTTG
sg092391	Edn3	chr2_174761691_174761720	GGCAGGTCTGGGAAACAAG
sg010311	Edn3	chr2_174761738_174761767	GTAAGTGAAGCACGTGCAG
sg051606	Edn3	chr2_174761754_174761783	TGCTTCACTTACAAGGACA
sg050709	Dido1	chr2_180667959_180667988	TTGTTTATAAGCAAACAGG
sg009416	Dido1	chr2_180668028_180668057	CAGAGTGTAAGGTGACCAG
sg009415	Dido1	chr2_180670283_180670312	AGACCGTGTGGGATTACGT
sg091490	Dido1	chr2_180673229_180673258	CTTCTGAATCTGATACCGG
sg050708	Dido1	chr2_180675277_180675306	CTGCCATATTAGAGTAAGG
sg091491	Dido1	chr2_180688812_180688841	CAGCCTCACAACAACAGGT
sg018879	Lcn10	chr2_25682779_25682808	CTAAGGATGAAGTTAGAGA
sg101088	Lcn10	chr2_25682803_25682832	CTATCCATAGCTCTAGCCC
sg018878	Lcn10	chr2_25683616_25683645	AAAACAGGCCAGCTCAGGG
sg060219	Lcn10	chr2_25684023_25684052	CCCTGGACTGGCAGCCCCG
sg060218	Lcn10	chr2_25684074_25684103	CACGGGTATTCCTGAACAC
sg101089	Lcn10	chr2_25684347_25684376	GCCTCCACGCCCCAGGCGG
sg105029	Notch1	chr2_26468393_26468422	AGTGTAATAATCACGCATG
sg105030	Notch1	chr2_26468629_26468658	GGGGTTGCTACCCACACAG
sg022832	Notch1	chr2_26469911_26469940	TGCCCACCAGGCTTCGTCG
sg064164	Notch1	chr2_26476373_26476402	CCTGCAAGGACATGACCAG
sg064165	Notch1	chr2_26476454_26476483	TTTGTTCCACTCCACCCAG
sg022833	Notch1	chr2_26479489_26479518	GTGGCCATTGTGCAGACAG
sg110275	Prrc2b	chr2_32182579_32182608	GTTTGACAAGTATAAAGGG
sg028652	Prrc2b	chr2_32193937_32193966	AGGGGCCTCCCAATTCATG
sg028651	Prrc2b	chr2_32208773_32208802	CCCACGCATCACCCCGACA
sg069414	Prrc2b	chr2_32213113_32213142	ACAAAGTCAGGCTCCAATG
sg110274	Prrc2b	chr2_32214078_32214107	TCCAACAGAACTTACACCG
sg069415	Prrc2b	chr2_32214428_32214457	CAGGCCCTTCCGTAGGAGG
sg016508	Hspa5	chr2_34772565_34772594	GTGTTCAAGAACGGCCGCG
sg016509	Hspa5	chr2_34772616_34772645	GAGTGAAGGCCACATACGA
sg057837	Hspa5	chr2_34772720_34772749	ATTCCAAGTGCGTCCGATG
sg098698	Hspa5	chr2_34774274_34774303	GTGCAGAAACTCCGGCGTG
sg098697	Hspa5	chr2_34774693_34774722	CGTGGCATAAACCCCGATG
sg057838	Hspa5	chr2_34774724_34774753	AGGACACCAGCCTGGACAG
sg019385	Lrp1b	chr2_40677544_40677573	GATCACTCCCATATAGAGG
sg101601	Lrp1b	chr2_40919204_40919233	CACAGCGACGATTGTAGCA
sg060729	Lrp1b	chr2_41185948_41185977	TGTTCATGAAGGAATCCGG
sg019384	Lrp1b	chr2_41282210_41282239	AGACGTTCTGAGATCCGAG
sg101600	Lrp1b	chr2_41468814_41468843	ATGATCCACGAAAACAACA
sg060728	Lrp1b	chr2_41511432_41511461	TGGGAGTAGTAGACTACCA
sg104509	Neb	chr2_52210362_52210391	CGAATGGCACAGCATCGGG
sg022307	Neb	chr2_52225593_52225622	TGGGCCTGTAGCATCGCTG
sg063640	Neb	chr2_52237103_52237132	TATCGCTCTAGCGCCAATG
sg063641	Neb	chr2_52281753_52281782	AAACAGTGCAAATACAAGG
sg104508	Neb	chr2_52288793_52288822	GATGCTATTCCGATCACCG
sg022308	Neb	chr2_52306563_52306592	TAAAGGCAGGAGCATCCGG
sg001706	Acvr1c	chr2_58280244_58280273	ACCAAATCTCCCAAACCAG
sg042965	Acvr1c	chr2_58287725_58287754	GAGGCGGAAATTTATCAGA
sg083711	Acvr1c	chr2_58287743_58287772	GAGAGATCTTGGTTCCGTG
sg083710	Acvr1c	chr2_58296006_58296035	ACTAAGAGACACAACGTGG
sg001705	Acvr1c	chr2_58315880_58315909	CTGAGCATTTAGTTCCGGG
sg042966	Acvr1c	chr2_58357657_58357686	TGGCCATGACCCCAGCGCG
sg072233	Scn3a	chr2_65460733_65460762	CAAAGAGACAATCAAGGGG
sg113088	Scn3a	chr2_65495187_65495216	AAGTGATAGAAATCCACGA
sg072232	Scn3a	chr2_65497533_65497562	TGTGTTTGCAAGATCAATG
sg031478	Scn3a	chr2_65507140_65507169	ATCCTGACCAACACGATGG
sg031477	Scn3a	chr2_65514493_65514522	TGGATGGGAACCCGCTGAG
sg113089	Scn3a	chr2_65530851_65530880	GTTAAAATATACAAGGCGG
sg113099	Scn7a	chr2_66675867_66675896	TCATGGCAAAACCAAACAA
sg031487	Scn7a	chr2_66687751_66687780	CAGAACTCTTAGTGCTCGA
sg113098	Scn7a	chr2_66705020_66705049	TACTGGAAGACACTACCCT
sg072242	Scn7a	chr2_66726235_66726264	AAGGCACAAATCCTGACAA
sg072243	Scn7a	chr2_66737429_66737458	GAAGCACAAATGTCTGCGG
sg031488	Scn7a	chr2_66741951_66741980	AGATTATCCCTTTGAACCA
sg121392	Xirp2	chr2_67509102_67509131	GTTCGAGGAATATCCATGG
sg080570	Xirp2	chr2_67509118_67509147	TGGAGGAAAATGTCAAAGG
sg039841	Xirp2	chr2_67510519_67510548	CAGTGACAGACGTACAAGG
sg080569	Xirp2	chr2_67511288_67511317	GGATGTCAAGACAACTACG
sg039842	Xirp2	chr2_67514231_67514260	AAGTCCTAAGCCTTACATG
sg121393	Xirp2	chr2_67515918_67515947	CCTGTTAAACCATACCAGG
sg045269	B3galt1	chr2_68118081_68118110	CGAGTTCTTATGTTGCCAA
sg004002	B3galt1	chr2_68118225_68118254	AGGCAATCCGGGAGACATG
sg086019	B3galt1	chr2_68118246_68118275	GGGATGAAAACAACTTCAA
sg086020	B3galt1	chr2_68118247_68118276	GGATGAAAACAACTTCAAA
sg004001	B3galt1	chr2_68118397_68118426	CACCCTCAAAACCTTAATG
sg045268	B3galt1	chr2_68118549_68118578	TCACTGGTTACGTCATCAA
sg019387	Lrp2	chr2_69428596_69428625	GTTTCATCAGCTCCAGGGG
sg101603	Lrp2	chr2_69469636_69469665	GATAGGCGCAACGACTGTG
sg060730	Lrp2	chr2_69500630_69500659	GGATGGCAATTATTCCGAG
sg101602	Lrp2	chr2_69505238_69505267	TATCCTATTGGACACACGC
sg019386	Lrp2	chr2_69510973_69511002	ATATGACCGTTGTTCGACG
sg060731	Lrp2	chr2_69536076_69536105	CAGACTATGACACCTGCGG
sg043773	Alx4	chr2_93642841_93642870	AGCCGGGCCCGCTACGGCG
sg084522	Alx4	chr2_93643004_93643033	CCTGCAAAACGCCCCCGGA
sg002511	Alx4	chr2_93643009_93643038	GCTTGAGGCTACCGTCCGG
sg002510	Alx4	chr2_93643071_93643100	CGTGCACTCACCGTAGCAG
sg043772	Alx4	chr2_93668514_93668543	TAACAAAGGCAAGAAGCGG
sg084521	Alx4	chr2_93668648_93668677	TCATGGCTGACCTGCACAC
sg054289	Gata3	chr2_9868757_9868786	CCTTATCAAGCCCAAGCGA
sg095086	Gata3	chr2_9874404_9874433	CGGGTTCGGATGTAAGTCG
sg095085	Gata3	chr2_9874596_9874625	CAGCTGCACCTGATACTTG
sg012982	Gata3	chr2_9874786_9874815	CCAAGACGTCCATCCACCA
sg054288	Gata3	chr2_9877378_9877407	TACTACGGAAACTCCGTCA
sg012983	Gata3	chr2_9877531_9877560	GTGAGCCACCATCACCCCG
sg011294	Fabp4	chr3_10205250_10205279	CAATAAAGAGAAAACGAGA
sg052591	Fabp4	chr3_10205313_10205342	GCATCATAACCCTAGATGG
sg011293	Fabp4	chr3_10205948_10205977	ATCACCGCAGACGACAGGA
sg093379	Fabp4	chr3_10206030_10206059	TGGGGATTTGGTCACCATC
sg093380	Fabp4	chr3_10206088_10206117	ATGCCTGCCACTTTCCTTG
sg052590	Fabp4	chr3_10208431_10208460	ATGATTACATGAAAGAAGT
sg046615	Casq2	chr3_102113098_102113127	CCCGTCAAACTCAATCGTG
sg087375	Casq2	chr3_102113105_102113134	CGCACGATTGAGTTTGACG
sg005339	Casq2	chr3_102116884_102116913	ATCGTGAATAACAAGCTGG
sg046614	Casq2	chr3_102119915_102119944	GATTACAAAGCATTCCAAG
sg005338	Casq2	chr3_102119967_102119996	CTTACCGCCTTGTCAAAGG
sg087376	Casq2	chr3_102127947_102127976	CTACGTCGCTTGCGCCCAG
sg022424	Neurog2	chr3_127633824_127633853	ATGTCCTCCAGCGCGGACG
sg104624	Neurog2	chr3_127634016_127634045	TCCCGAGGTGCCAAGACGG
sg063756	Neurog2	chr3_127634048_127634077	GCGCATCAAGAAGACCCGC
sg063757	Neurog2	chr3_127634103_127634132	CACAACCTAAACGCCGCGC
sg022423	Neurog2	chr3_127634191_127634220	AGCGCCCAGATGTAATTGT
sg104625	Neurog2	chr3_127634423_127634452	GTAGTCCACGTCTGACCCG
sg007524	Col25a1	chr3_130181647_130181676	AACCAACGACCTCCAGGCG
sg007525	Col25a1	chr3_130182776_130182805	CATATGGCTAAAATAAGAA
sg048812	Col25a1	chr3_130475633_130475662	TCAGCAGCTCATTAAACGC
sg089583	Col25a1	chr3_130476445_130476474	TACTCCTGGCATTCCTCGG
sg089582	Col25a1	chr3_130530104_130530133	TGGAGAATCTGGCCGCCCG
sg048813	Col25a1	chr3_130549165_130549194	TTGTGACAGGGTGATCGTG
sg035638	Tet2	chr3_133476569_133476598	GAACAACCAAAAGAAAAGG
sg035637	Tet2	chr3_133480313_133480342	GTATATCGGAGATCGAGTG
sg117216	Tet2	chr3_133486391_133486420	TCACAATAATACCCAAGGG
sg117217	Tet2	chr3_133487302_133487331	GTTCTGGAAGCATCAAGGG
sg076377	Tet2	chr3_133487482_133487511	GAGGCTGAAGAACAAGACG
sg076376	Tet2	chr3_133487634_133487663	GAAGCTTGCAAATTCCGGT
sg043215	Adh1	chr3_138280391_138280420	TGCCGCTCAGACGATCACG
sg083962	Adh1	chr3_138280491_138280520	GGGTGACTTGTGTGAAACC
sg001954	Adh1	chr3_138282618_138282647	CTTCGCGCAAAGTCCCCCG
sg083963	Adh1	chr3_138282625_138282654	CTCGGGGGACTTTGCGCGA
sg043216	Adh1	chr3_138282720_138282749	GTGGTAGATGATATAGCAG
sg001955	Adh1	chr3_138286887_138286916	TCCAGGAGATGACCGACGG
sg083964	Adh4	chr3_138418160_138418189	CAATTTCTTCAATGCAAAG
sg043217	Adh4	chr3_138419307_138419336	GAGTGACCAACTTCAAACC
sg001956	Adh4	chr3_138422167_138422196	GAGCTCCTGATCAATAGTG
sg083965	Adh4	chr3_138422261_138422290	TCATTCTCTCAATACACTG
sg043218	Adh4	chr3_138424107_138424136	GAGAAGTTCCCAAAAGCCA
sg001957	Adh4	chr3_138424132_138424161	CTGGGATTCAGGCAGTCAG
sg089080	Clca4b	chr3_144915439_144915468	GTATGCTGAAGTTCTACAA
sg048316	Clca4b	chr3_144916750_144916779	GTTGTAATTGACAGCACCG
sg089081	Clca4b	chr3_144925208_144925237	ACGCCCATGGAGACACCAC
sg007028	Clca4b	chr3_144926103_144926132	GGGCAGCTGTATAACCAGA
sg048315	Clca4b	chr3_144928306_144928335	CTCTGCCCTCGAAGGCGGG
sg007029	Clca4b	chr3_144932445_144932474	AAGCAGGTACAAGAGGAAG
sg089079	Clca4a	chr3_144961907_144961936	TTGATGAGGTGAAAGACAG
sg048314	Clca4a	chr3_144963631_144963660	TACCTACAAGTGCCAATGG
sg048313	Clca4a	chr3_144966392_144966421	AAGGAAAACCATAATCGAG
sg007026	Clca4a	chr3_144968352_144968381	GAGTCTATGCATGCCAAGG
sg089078	Clca4a	chr3_144968381_144968410	GTGCTCCACAGGTATCACG
sg007027	Clca4a	chr3_144974957_144974986	CCAAAGCAGGTACAGGAGG
sg087293	Car3	chr3_14864344_14864373	GGTCATAAGATGCTGACCA
sg046533	Car3	chr3_14866876_14866905	CACGGCTCTGAGCACACCG
sg046532	Car3	chr3_14868372_14868401	AAGTATAACACCTTTGGAG
sg005256	Car3	chr3_14869276_14869305	CTGGACAAAATTAAGACGA
sg005257	Car3	chr3_14870125_14870154	CAATGCACTCCTCGCAGGG
sg087294	Car3	chr3_14871577_14871606	TCCCCACCAGAGGCACCGG
sg110616	Ptgfr	chr3_151801801_151801830	CGTAGCAGAATATAGACCC
sg069757	Ptgfr	chr3_151835075_151835104	AAGGGACTCCAGCAGACGC
sg110615	Ptgfr	chr3_151835464_151835493	CAGTGCGATGGCCATCGAG
sg028994	Ptgfr	chr3_151835530_151835559	GATTCCAAAAATACTGCAC
sg069756	Ptgfr	chr3_151835606_151835635	TTGGCCACCTTATCAACGG
sg028993	Ptgfr	chr3_151835687_151835716	TTCTGTCTAAATCTCTGGT
sg054587	Gipc2	chr3_152128158_152128187	GTTAAAACGATCTGTGTGG
sg095386	Gipc2	chr3_152137582_152137611	CCATCACGGATAACGGCGT
sg095385	Gipc2	chr3_152137711_152137740	ATACGCCTAAAATTGACAT
sg013280	Gipc2	chr3_152165654_152165683	GGCGCGATCTCGAACACGC
sg054588	Gipc2	chr3_152165708_152165737	AAGTCCTCCACTCGGCCCG
sg013281	Gipc2	chr3_152165832_152165861	AAGGCGGCCAAGTCCAAGG
sg084280	Ak5	chr3_152472852_152472881	GAGAAGCCAGAGCAGCCAG
sg084279	Ak5	chr3_152615879_152615908	TGGAAGTACTTCACTAGTG
sg002269	Ak5	chr3_152615995_152616024	CCTGGCTTGTGCCAACCAG
sg043530	Ak5	chr3_152653582_152653611	GCCAAGATAATCACCAATG
sg002268	Ak5	chr3_152660538_152660567	CGTTACCGCCCCTAAATGG
sg043531	Ak5	chr3_152660539_152660568	ATTGTCCTCCATTTAGGGG
sg104850	Nlgn1	chr3_25433799_25433828	TTATACTCTAGCTATGAGG
sg022651	Nlgn1	chr3_25436058_25436087	TGAGCCAAAGTTCGAGTGA
sg063982	Nlgn1	chr3_25436324_25436353	ATGTTGGGAGTTAACCAAG
sg063983	Nlgn1	chr3_25436435_25436464	AGGCTATGTGGTATCGGGC
sg022650	Nlgn1	chr3_25439949_25439978	AAACACAGTGATTCGCAAG
sg104849	Nlgn1	chr3_26133406_26133435	CGTTCCGGATGTCAGACCA
sg089115	Cldn11	chr3_31150221_31150250	ACGTCCACCAATGACTGGG
sg048347	Cldn11	chr3_31150270_31150299	GCCGAAAAATGGACGAACT
sg007060	Cldn11	chr3_31150302_31150331	CTGTGGGCTGACTGCGTCA
sg089114	Cldn11	chr3_31150318_31150347	TTGCAGTGGTAGAGACCAG
sg048348	Cldn11	chr3_31153943_31153972	GCGGGCAGGCCCAGAACGG
sg007061	Cldn11	chr3_31163087_31163116	CATACAGGAAACCAGATGG
sg033122	Slc7a14	chr3_31227155_31227184	TTCGCAGCATAGAAGCCAT
sg114724	Slc7a14	chr3_31230309_31230338	GGATGCCGTGATGGCGTAA
sg033121	Slc7a14	chr3_31237487_31237516	CTGGGAGTGAAAAACTCTG
sg114725	Slc7a14	chr3_31238612_31238641	CACGGTGTCCACCATCCAG
sg073870	Slc7a14	chr3_31238736_31238765	AATGCCACGAACTCCCCAA
sg073871	Slc7a14	chr3_31257798_31257827	GAGTGCATTGCATACCAGG
sg082910	4932438a13rik	chr3_36942212_36942241	CTTCACAATCAGTCAGTCG
sg042174	4932438a13rik	chr3_36959390_36959419	ATAGTGTCACAGAAAGGGG
sg000915	4932438a13rik	chr3_36964986_36965015	TGTGCAGGAGATCTCACAT
sg042173	4932438a13rik	chr3_36974256_36974285	GTGGGAAATCGTGGAAGTG
sg082911	4932438a13rik	chr3_36988215_36988244	GTGAACCGCACACACCTAG
sg000916	4932438a13rik	chr3_37050764_37050793	GAGTGGATAAAATCCGAGG
sg094293	Fgf2	chr3_37348870_37348899	TCGCTTCCCGCACTGCCGG
sg094292	Fgf2	chr3_37348937_37348966	GGCTCTACTGCAAGAACGG
sg053499	Fgf2	chr3_37348964_37348993	TCCTGCGCATCCATCCCGA
sg012194	Fgf2	chr3_37348980_37349009	CTCGCGGACGCCATCCACG
sg012195	Fgf2	chr3_37396193_37396222	AACTCCAAGCAGAAGAGAG
sg053498	Fgf2	chr3_37396235_37396264	TTCATAGCAAGGTACCGGT
sg011868	Fat4	chr3_38887691_38887720	GGGAACTGCCAAACACCGG
[truncated: 1,681 more rows]

## Sheet: Group
Sample_ID	Cell	Assay	MOI	Tissue	Mouse_ID	Seq_ID
M_51	JC	in vitro	3	Day0	NA	F004007-9
M_52	JC	in vitro	0.3	Day0	NA	F004016-12
M_53	JC	in vitro	3	Day0	NA	F004015-5
M_58	JC	in vitro	0.3	Day30	NA	F004015-8
M_55	JC	in vitro	3	Day30	NA	F004015-9
M_60	JC	s.c.	0.3	Flank-L	14	F004016-1
M_61	JC	s.c.	0.3	Flank-R	14	F004016-2
M_54	JC	s.c.	0.3	Liver	14	F004011-7
M_60	JC	s.c.	0.3	Flank-L	15	F004016-5
M_59	JC	s.c.	0.3	Abdomen	15	F004012-2
M_61	JC	s.c.	0.3	Abdomen	15	F004012-3
M_69	JC	s.c.	0.3	Abdomen	15	F004012-4
M_70	JC	s.c.	0.3	Abdomen	15	F004012-5
M_64	JC	s.c.	0.3	Abdomen	15	F004012-6
M_65	JC	s.c.	0.3	Liver	15	F004012-7
M_66	JC	s.c.	0.3	Liver	15	F004012-8
M_68	JC	s.c.	0.3	Liver	15	F004012-10
M_62	JC	orth.	0.3	Mammary fat pad-L	16	F004016-3
M_63	JC	orth.	0.3	Mammary fat pad-R	16	F004016-4
M_71	JC	orth.	0.3	Colon	16	F004011-8
M_72	JC	orth.	3	Mammary fat pad-L	17	F004007-4
M_73	JC	orth.	3	Mammary fat pad-R	17	F004007-5
M_74	JC	orth.	3	Lung	17	F004007-1
M_75	JC	orth.	3	Lung	17	F004007-3
M_76	JC	orth.	3	Mammary fat pad-L	18	F004007-6
M_77	JC	orth.	3	Mammary fat pad-R	18	F004007-7
M_78	JC	orth.	3	Lung	18	F004007-2
M_79	JC	orth.	3	Colon	18	F004007-10
M_80	JC	orth.	3	Colon	18	F004008-1
M_81	JC	i.v.	0.3	Lung	19	F004011-6
M_82	JC	i.v.	0.3	Abdomen	20	F004013-11
M_83	JC	i.v.	0.3	Lung	21	F004013-12
M_84	JC	i.v.	0.3	Lung	21	F004014-1
M_85	JC	i.v.	0.3	Lung	21	F004014-2
M_87	JC	i.v.	0.3	Lung	22	F004014-4
M_88	JC	i.v.	0.3	Lung	22	F004014-5
M_89	JC	i.v.	3	Lung	23	F004011-10
M_91	JC	i.v.	3	Lung	24	F004014-7
M_92	JC	i.v.	3	Lung	24	F004014-8
M_93	JC	i.v.	3	Lung	24	F004014-9
M_94	JC	i.v.	3	Lung	24	F004014-10
M_95	JC	i.v.	3	Lung	24	F004014-11
M_97	JC	i.v.	3	Lung	24	F004015-1
M_98	JC	i.v.	3	Lung	24	F004015-2
M_99	JC	i.v.	3	Lung	25	F004015-3
M_100	JC	i.v.	3	Lung	26	F004015-4

## Sheet: Count
Gene	sgRNA	M_51	M_52	M_53	M_54	M_55	M_56	M_57	M_58	M_59	M_60	M_61	M_62	M_63	M_64	M_65	M_66	M_68	M_69	M_70	M_71	M_72	M_73	M_74	M_75	M_76	M_77	M_78	M_79	M_80	M_81	M_82	M_83	M_84	M_85	M_87	M_88	M_89	M_91	M_92	M_93	M_94	M_95	M_97	M_98	M_99	M_100
lrp2	chr2_69428596_69428625	27167.2	204.055	171.582	67.5695	69.1998	0	0	0	68.704	0	0	0	0	0	0	0	0	0.481508	0	0	136.058	13481.2	8567.78	4244.96	42.5447	107764	8494.16	26.6839	0	0	0	0	0	0	0	0	0	0	0	0	0	0	0	0	0	47.9021
fabp4	chr3_10205313_10205342	51671	232.183	152.079	124.638	386.693	37.309	20090.3	0	68.704	0	0	0	0	0	0	0	0	17.3343	1.17699	0	319.4	76784.2	56349.6	30940.4	634.46	303.581	59615.5	504124	0	0	1.12005	72.9928	0	0	0	0	0	0	0	0	14.101	87.6905	226.019	37.7742	198.25	95.8043
mlxipl	chr5_135121497_135121526	141163	308.129	218.072	138.563	220.771	0	3620.34	0	206.112	0	0	0	0	0	0	0	0	0	0	0	275.825	22859.4	19552.1	10223.8	77.9161	153768	18082.7	45.4139	0	0	0	0	0	0	0	0	0	0	0	0	0	0	0	37.7742	0	47.9021
trp53	chr11_69588630_69588659	13716.8	167.233	162.323	137.878	790.096	11239.3	74905.3	155141	137.408	227167	52586.9	150967	254283	185613	198464	178551	48467.2	4.81508	0.588496	9487.33	154.369	1992.87	28669.1	94465.3	59.3646	293.299	54508.5	10.5196	102196	234944	221985	79562.1	6618.78	195715	154917	197532	75728.3	223168	21791	195116	213601	209712	678.057	831.033	4014.56	4478.85
ank1	chr8_23095215_23095244	44.3909	579.18	367.788	536.219	269.722	0	0	0	0	0	0	0	0	0	0	0	0	0	0	0	582.709	117.228	0	29.8941	0	0.257055	104.223	0	0	0	0	0	0	0	0	0	0	0	0	0	0	0	301.359	37.7742	0	71.8532
prrt4	chr6_29176434_29176463	2175.15	71.5984	57.1283	55.2427	24.7704	0	0	0	0	0	0	0	0	0	0	0	0	0	0	0	80.6614	3047.92	1867.34	896.822	8648.19	11.0533	2032.35	11039.9	0	0	0	0	0	0	0	0	0	0	0	0	0	0	0	0	49.5625	0
igf1	chr10_87913617_87913646	8212.32	208.914	217.678	186.044	159.238	0	0	0	0	0	0	0	0	0	0	0	0	0	0	0	224.368	1055.05	439.373	179.364	2616.74	0.771164	208.446	0.513151	0	0	0	0	0	0	0	0	0	0	0	0	0	0	75.3397	37.7742	49.5625	47.9021
cdk12	chr11_98250317_98250346	52470.1	175.672	163.308	35.3827	0.19659	0	50.9907	0	0	0	0	0	0	0	0	0	0	0	0	0	41.7214	6799.21	2746.08	2421.42	10.8835	33867.4	4116.8	9.4933	0	0	0	0	0	0	0	0	0	0	0	0	0	0	0	0	0	0
ces1g	chr8_93326808_93326837	44.3909	97.1692	159.959	60.493	252.029	0	0	0	0	0	0	0	0	0	0	0	0	0.963017	0	0	176.389	0	109.843	0	279.509	93.3108	104.223	0.769727	0	0	0	0	0	0	0	0	0	0	0	0	0	0	75.3397	37.7742	0	23.9511
bcor	chrX_12056886_12056915	4039.57	285.626	133.759	4140.92	128.767	0	0	0	0	0	0	0	0	0	0	0	0	0	0	0	147.879	7619.8	3075.61	2182.27	37138.5	184.308	4116.8	8.21042	0	0	0	0	0	0	0	0	0	0	0	0	0	0	452.038	302.194	247.812	143.706
ptgfr	chr3_151835606_151835635	9632.83	217.352	161.141	86.7447	161.99	0	0	0	206.112	0	0	0	0	0	0	0	0	0	0	0	268.639	19928.7	10105.6	4962.42	90429.7	22.8779	10735	20.5261	0	0	0	0	0	0	0	0	0	0	0	0	0	0	0	37.7742	49.5625	0
slc7a14	chr3_31238736_31238765	3462.49	139.617	93.3752	160.021	119.134	0	0	0	0	0	0	0	0	0	0	0	0	0	0	0	126.323	0	0	29.8941	0	0	0	0	0	0	0	0	0	0	0	0	0	0	0	0	0	0	0	0	0	23.9511
hcar2	chr5_123865167_123865196	3418.1	155.471	133.168	97.9302	211.531	9.32726	0	0	137.408	0	0	0	0	0	0	0	0	0.481508	0.588496	0	235.031	117.228	0	15305.8	41.8026	0	104.223	0.256576	0	0	0	0	0	0	0	0	0	0	0	0	0	0	0	0	49.5625	23.9511
astn1	chr1_158572959_158572988	10343.1	211.471	243.288	140.161	80.7986	0	0	0	0	0	0	0	0	0	0	0	0	0	1.76549	0	440.393	117.228	109.843	89.6822	0	0.257055	156.334	0.513151	0	0	0	0	0	0	0	0	0	0	0	0	0	0	0	0	49.5625	23.9511
mrps24	chr11_5707630_5707659	5016.17	277.699	295.294	121.214	141.152	0	0	0	0	0	0	0	0	0	0	0	0	0	0	0	511.319	11488.3	4393.73	3288.35	46889.7	13.8809	6201.26	12.5722	0	0	0	0	0	0	0	0	0	0	0	0	0	0	75.3397	37.7742	0	0
matn2	chr15_34345419_34345448	4971.78	174.393	221.027	189.012	250.653	0	0	0	68.704	0	0	0	0	0	0	0	0	0	0	0	301.785	12191.7	5052.79	3318.24	46411.8	10.0251	5367.48	13.8551	0	0	0	0	0	0	0	0	0	0	0	0	0	0	150.679	37.7742	0	95.8043
hspb7	chr4_141422603_141422632	88.7818	283.069	251.758	107.746	117.561	0	0	0	68.704	0	0	0	0	0	0	0	0	0	0	0	266.785	0	0	59.7881	0	0.257055	52.1114	0.256576	0	0	0	0	0	0	0	0	0	0	0	0	0	0	75.3397	0	49.5625	47.9021
dpp6	chr5_27049563_27049592	13938.7	342.649	297.264	254.527	552.615	9.32726	50.9907	0	274.816	0	0	0	0	0	0	0	0	0	0	0	249.865	117.228	0	30462.1	338.131	0.257055	52.1114	0	0	0	3.36015	218.978	0	0	0	0	0	3.49327	0	0	0	0	75.3397	75.5484	0	71.8532
dsg1b	chr18_20404894_20404923	44.3909	167.745	157.989	70.5371	373.718	0	0	0	0	0	0	0	0	0	0	0	0	0	0	0	250.328	0	0	29.8941	0.247353	0	0	0	0	0	0	0	0	0	0	0	0	0	0	0	0	0	0	37.7742	49.5625	71.8532
plin1	chr7_79726388_79726417	10609.4	298.412	352.225	415.233	486.954	9.32726	0	0	0	0	0	0	0	0	0	0	0	0	0.588496	0	425.326	19342.6	8677.62	5141.78	92836.7	27.5048	8911.05	24.1181	0	0	0	0	0	0	0	0	0	0	0	0	0	0	226.019	37.7742	44358.4	119.755
fmo2	chr1_162880560_162880589	44.3909	114.302	97.9061	136.052	178.701	0	0	0	68.704	0	0	0	0	0	0	0	0	0	0	0	123.078	0	109.843	0	0	0	0	0	0	0	0	0	0	0	0	0	0	0	0	0	0	0	75.3397	75.5484	0	23.9511
scn2b	chr9_45125602_45125631	221.955	454.394	317.751	302.237	473.979	0	152.972	0	68.704	0	0	0	0	0	0	0	0	0.963017	0	0	146.488	234.456	219.687	89.6822	957.997	0.257055	156.334	0.513151	0	0	0	0	0	0	0	0	0	0	0	0	0	0	226.019	37.7742	49.5625	95.8043
syce1	chr7_140787735_140787764	2175.15	285.882	396.943	133.998	240.037	0	0	0	206.112	0	0	0	0	0	0	0	0	0.481508	0	0	181.72	3634.06	2196.87	926.716	18716.7	6.94047	2240.79	4.10521	0	0	0	0	0	0	0	0	0	0	0	0	0	0	150.679	37.7742	99.1249	0
hpd	chr5_123180689_123180718	754.646	248.293	221.421	302.237	511.135	0	0	0	0	0	0	0	0	0	0	0	0	0.481508	0	0	216.256	703.367	768.903	298.941	2.72088	5114.1	469.003	2.56576	0	0	0	0	0	0	0	0	0	0	0	0	0	0	150.679	37.7742	49.5625	47.9021
men1	chr19_6336880_6336909	44.3909	48.8403	172.567	30.3606	77.4566	0	0	0	0	0	0	0	0	0	0	0	0	0	0	0	272.58	0	109.843	0	0.494705	0	104.223	0	0	0	0	0	0	0	0	0	0	0	0	0	0	0	0	0	49.5625	0
saa3	chr7_46712620_46712649	44.3909	164.421	133.759	210.698	247.704	0	0	0	0	0	0	0	0	0	0	0	0	0	0	0	138.376	0	0	0	0	0	52.1114	0	0	0	0	0	0	0	0	0	0	0	0	0	0	0	150.679	37.7742	49.5625	0
hpd	chr5_123176144_123176173	887.818	158.795	165.278	63.6888	356.615	0	0	0	68.704	0	0	0	0	0	0	0	0	0	0	0	159.237	937.822	1208.28	538.093	5266.14	0.257055	729.56	1.53945	0	0	0	0	0	0	0	0	0	0	0	0	0	0	75.3397	0	0	23.9511
dsg1b	chr18_20399510_20399539	399.518	272.074	298.249	471.389	202.488	0	0	0	0	0	0	0	0	0	0	0	0	0	0	0	354.632	1289.51	878.747	388.623	5299.28	1.28527	990.117	1.28288	0	0	0	0	0	0	0	0	0	0	0	0	0	0	75.3397	0	0	47.9021
slc25a27	chr17_43664121_43664150	5504.47	304.293	367.591	271.191	313.168	0	0	0	137.408	0	0	0	0	0	0	0	0	0.481508	0	0	135.826	0	0	0	48.7285	0	104.223	0	0	0	0	0	0	0	0	0	0	0	0	0	0	0	0	37.7742	49.5625	47.9021
irx1	chr13_71959842_71959871	44.3909	128.366	94.5572	215.949	143.511	0	0	0	0	0	0	0	0	0	0	0	0	0	0	0	186.356	234.456	109.843	0	798.454	0.257055	156.334	0.513151	0	0	0	0	0	0	0	0	0	0	0	0	0	0	0	0	0	23.9511
gys2	chr6_142451609_142451638	88.7818	159.818	172.567	78.0702	365.265	0	0	0	0	0	0	0	0	0	0	0	0	0	0.588496	0	254.037	0	109.843	29.8941	0	0	104.223	0.256576	0	0	0	0	0	0	0	0	0	0	0	0	0	0	150.679	37.7742	99.1249	0
stab2	chr10_86969325_86969354	3817.62	131.434	120.954	103.181	17.2999	0	0	0	0	0	0	0	0	0	0	0	0	0	0	0	183.111	0	0	89.6822	0.247353	0	52.1114	0	0	0	0	0	0	0	0	0	0	0	0	0	0	0	0	37.7742	49.5625	0
clca4a	chr3_144966392_144966421	2263.94	152.402	125.682	439.43	133.681	0	0	0	68.704	0	0	0	0	0	0	0	0	0	0	0	125.628	351.683	0	0	12.615	0.257055	0	59.269	0	0	0	0	0	0	0	0	0	0	0	0	0	0	0	37.7742	0	47.9021
chrdl1	chrX_143311123_143311152	44.3909	227.836	134.744	189.24	305.698	0	0	0	0	0	0	0	0	0	0	0	0	0	0	0	127.25	0	219.687	0	0	88.4268	52.1114	0.256576	0	0	0	0	0	0	0	0	0	0	0	0	0	0	75.3397	75.5484	49.5625	23.9511
edn3	chr2_174761691_174761720	3728.84	175.16	263.381	235.58	23.3942	0	0	0	0	0	0	0	0	0	0	0	0	0	0.588496	0	223.905	4571.88	3624.83	1345.23	537.25	20162.8	2136.57	10.7762	0	0	0	0	0	0	0	0	0	0	0	0	0	0	0	37.7742	49.5625	0
gm21541	chr4_41903704_41903733	44.3909	108.165	174.734	10.9572	290.56	0	0	0	0	0	0	0	0	0	0	0	0	0	0	0	119.138	0	0	0	21.2723	0.514109	0	0	0	0	0	0	0	0	0	0	0	0	0	0	0	0	0	151.097	49.5625	23.9511
cadm3	chr1_173344400_173344429	88.7818	354.923	308.69	92.9081	207.206	9.32726	0	0	0	0	0	0	0	0	0	0	0	0	0	0	345.592	117.228	109.843	89.6822	0	0.257055	104.223	0.256576	0	0	0	0	0	0	0	0	0	0	0	0	0	0	0	37.7742	99.1249	0
bcor	chrX_12048353_12048382	799.036	490.449	207.041	2138.71	95.9361	9.32726	0	0	0	0	0	0	0	0	0	0	0	0	0	0	248.706	1055.05	659.06	567.987	7391.89	2.05644	1459.12	2.05261	0	0	0	0	0	0	0	0	0	0	0	0	0	0	376.698	226.645	99.1249	143.706
svep1	chr4_58116591_58116620	44.3909	136.037	124.106	213.209	77.26	9.32726	0	0	0	0	0	0	0	0	0	0	0	0	0	0	182.183	0	0	0	0	0	52.1114	0	0	0	0	0	0	0	0	0	0	0	0	0	0	0	75.3397	0	0	23.9511
myh11	chr16_14201057_14201086	5371.3	67.507	146.958	21.2296	63.3021	0	0	0	68.704	0	0	0	0	0	0	0	0	0	0	0	61.655	0	0	29.8941	0	0	52.1114	0	0	0	0	0	0	0	0	0	0	0	0	0	0	0	0	0	0	0
pfkfb1	chrX_150628743_150628772	266.345	240.11	172.567	287.171	265.594	0	0	0	0	0	0	0	0	0	0	0	0	0	0	0	277.911	117.228	0	119.576	39.3291	1235.66	208.446	0.513151	0	0	0	0	0	0	0	0	0	0	0	0	0	0	226.019	0	0	71.8532
mdn1	chr4_32730040_32730069	399.518	4.85846	188.326	0	0.19659	0	0	0	0	0	0	0	0	0	0	0	0	0	0	0	71.3899	703.367	549.217	209.259	2985.05	0.514109	156.334	284.542	0	0	0	0	0	0	0	0	0	0	0	0	0	0	0	0	0	47.9021
ryr2	chr13_11710045_11710074	221.955	472.294	363.651	939.582	260.286	9.32726	0	0	274.816	0	0	0	0	0	0	0	0	0	0	0	486.981	0	0	0	29.435	0	104.223	25.9141	0	0	0	0	0	0	0	0	0	0	0	0	0	0	226.019	37.7742	297.375	95.8043
mrgpra2a	chr7_47427131_47427160	88.7818	215.818	147.943	77.1571	197.966	0	0	0	0	0	0	0	0	0	0	0	0	0	0	0	275.361	117.228	0	0	0	0.257055	0	0	0	0	0	0	0	0	0	0	0	0	0	0	0	0	0	37.7742	0	71.8532
ube2m	chr7_13035714_13035743	5504.47	280.256	257.274	66.1999	169.068	0	50.9907	0	0	0	0	0	0	0	0	0	0	0	1.17699	0	309.897	0	109.843	29.8941	0.989411	0	0	0.256576	0	0	0	0	0	0	0	0	0	0	0	0	0	0	226.019	0	49.5625	119.755
sphkap	chr1_83277462_83277491	88.7818	116.092	92.5872	57.7537	179.094	0	0	0	0	0	0	0	0	0	0	0	0	0	0	0	110.793	0	0	0	0.247353	0.257055	52.1114	0	0	0	0	0	0	0	0	0	0	0	0	0	0	0	75.3397	37.7742	99.1249	0
clca4b	chr3_144932445_144932474	799.036	99.7263	119.575	0	0	0	0	0	0	0	0	0	0	0	0	0	0	0	0	0	119.833	1289.51	1098.43	448.411	8292.75	2.8276	1302.79	2.56576	0	0	0	0	0	0	0	0	0	0	0	0	0	0	0	75.5484	0	0
pi15	chr1_17621450_17621479	6392.29	141.662	116.03	49.9923	83.1577	0	0	0	0	0	0	0	0	0	0	0	0	0	0	0	159.932	117.228	25154.1	29.8941	129.86	0	0	0.256576	96.1845	0	0	0	0	0	0	0	0	0	0	0	0	0	0	0	49.5625	0
capn6	chrX_143807279_143807308	13317.3	251.106	235.605	340.13	164.939	9.32726	0	0	137.408	0	0	0	0	0	0	0	0	0	0.588496	0	213.243	0	39543.6	59.7881	0.247353	0.257055	1615.45	0	1058.03	0	0	0	0	0	0	0	0	0	0	0	0	0	0	0	148.687	0
lrrc2	chr9_110960844_110960873	88.7818	206.101	264.169	95.4191	276.406	0	0	0	68.704	0	0	0	0	0	0	0	0	0	0	0	379.665	0	0	89.6822	0	0	0	0.256576	0	0	0	0	0	0	0	0	0	0	0	0	0	0	0	75.5484	148.687	71.8532
lhcgr	chr17_88753776_88753805	488.3	293.553	178.871	225.536	133.288	18.6545	0	0	0	0	0	0	0	0	0	0	0	1.92603	0	0	354.632	937.822	439.373	388.623	6.43117	2.31349	469.003	5492.77	0	0	0	0	0	0	0	0	0	0	0	0	0	0	0	75.5484	49.5625	47.9021
angpt4	chr2_151911428_151911457	6081.56	262.357	206.056	184.675	300.587	0	0	0	0	0.928573	15.8156	13.981	0	9570.72	0	46.0895	0	0.481508	0	0	272.348	8792.08	7249.66	3527.5	24.9826	60377	7139.26	18.4734	0	0	0	72.9928	0	17.2436	36.2209	0	0	0	219.005	10.9187	0	0	0	75.5484	297.375	95.8043
naalad2	chr9_18378690_18378719	2707.85	192.804	275.201	94.7343	80.0123	0	0	0	68.704	0	0	0	0	0	0	0	0	0	0	0	246.62	586.139	329.53	358.729	1.23676	3923.68	364.78	0.769727	0	0	0	0	0	0	0	0	0	0	0	0	0	0	75.3397	0	99.1249	23.9511
tnnt3	chr7_142511463_142511492	399.518	172.603	178.28	185.816	734.265	9.32726	50.9907	0	0	0	0	0	0	0	0	0	0	0	0	0.738142	173.839	351.683	219.687	89.6822	1342.63	285.331	312.668	0	0	0	0	0	0	0	0	0	17.6688	0	0	0	0	0	1054.76	77588.2	247.812	95.8043
tspan8	chr10_115835143_115835172	1953.2	142.941	139.866	170.522	143.118	0	0	0	0	0	0	0	0	0	0	0	0	0	0	0	105.462	117.228	0	18235.4	0	0	52.1114	0.256576	0	0	0	0	0	0	0	0	0	0	0	0	0	0	0	37.7742	49.5625	47.9021
sec22b	chr3_97914527_97914556	44.3909	103.818	205.465	40.4048	80.7986	0	0	0	0	0	0	0	0	0	0	0	0	0	0	0	230.163	117.228	0	59.7881	0	0.257055	0	0	0	0	0	0	0	0	0	0	0	0	0	0	0	0	226.019	151.097	0	36573.3
a530016l24rik	chr12_112497878_112497907	5504.47	200.987	287.02	294.704	248.687	0	0	0	0	0	0	0	0	0	0	0	0	0	0	0	346.519	234.456	109.843	149.47	1.23676	503.056	312.668	0.513151	0	0	0	0	0	0	0	0	0	0	0	0	0	0	75.3397	0	99.1249	0
gm13304	chr4_41904185_41904214	2175.15	52.1645	116.424	45.1985	65.8578	0	0	0	0	0	0	0	0	0	0	0	0	0	0	0	32.9135	0	0	59.7881	0	0	0	0	0	0	0	0	0	0	0	0	0	0	0	0	0	0	0	75.5484	49.5625	0
tnc	chr4_63995675_63995704	488.3	198.43	211.572	181.022	181.06	0	0	0	68.704	0	0	0	0	0	0	0	0	0	0	0	242.911	1523.96	329.53	298.941	3491.88	1.79938	521.114	1.53945	0	0	0	0	0	0	0	0	0	0	0	0	0	0	0	37.7742	99.1249	71.8532
actg2	chr6_83522799_83522828	7235.72	141.662	95.1481	108.887	604.515	0	0	0	137.408	0	0	0	0	0	0	0	0	0.481508	0	2.21442	203.044	10433.3	7139.82	3587.29	1109.13	41275	7035.04	13249.3	0	0	0	0	0	0	0	0	0	0	0	0	0	0	0	0	49.5625	0
smyd1	chr6_71262071_71262100	2041.98	247.781	197.585	282.833	133.288	0	0	0	137.408	0	0	0	0	0	0	0	0	0	0	0	127.714	4220.2	1647.65	1345.23	20665.6	6.68342	3074.57	6.67097	0	0	0	0	0	0	18400.2	0	0	0	0	0	0	0	0	75.5484	99.1249	23.9511
lrrc3b	chr14_15358325_15358354	44.3909	234.485	223.194	172.576	95.7395	0	0	0	0	0	0	0	0	0	0	0	0	0	0	0	191.455	0	0	29.8941	0.247353	0.257055	0	49.7757	0	0	0	0	0	0	0	0	0	0	0	0	0	0	0	37.7742	99.1249	0
col6a3	chr1_90803831_90803860	8345.49	116.859	179.068	155.912	452.747	0	0	0	0	0	0	0	0	0	0	0	0	0	0	0	117.747	0	0	29.8941	0	0.257055	104.223	0	0	0	0	0	0	0	0	0	0	0	0	0	0	0	226.019	0	49.5625	71.8532
prex2	chr1_11140307_11140336	177.564	230.649	160.944	105.463	560.282	9.32726	50.9907	0	137.408	0	0	0	0	0	0	0	0	0	0	0	173.839	937.822	329.53	149.47	1364.64	0.771164	260.557	0.256576	0	0	0	0	0	0	0	0	0	0	0	0	0	0	75.3397	37.7742	49.5625	95.8043
cbfb	chr8_105171320_105171349	133.173	183.087	302.78	13.0117	80.7986	9.32726	0	0	0	0	0	0	0	0	0	0	0	0	0	0	352.082	234.456	0	149.47	1.73147	0.257055	52.1114	930.087	0	0	0	0	0	0	0	0	0	0	0	0	0	0	0	75.5484	148.687	23.9511
btnl9	chr11_49169470_49169499	1775.64	185.9	193.645	154.542	25.3602	0	0	0	0	0	0	0	0	0	0	0	0	0	0	0	211.388	2227.33	2306.71	1195.76	7.17323	15159.8	2397.12	4.10521	0	0	0	0	0	0	0	0	0	0	0	0	0	0	150.679	37.7742	0	23.9511
has3	chr8_106874397_106874426	44.3909	301.48	455.056	132.856	468.868	0	0	0	137.408	0	0	0	0	0	0	0	0	0	0	0	167.813	0	0	0	0	0	52.1114	0	0	0	0	0	0	0	0	0	0	0	0	0	0	0	75.3397	151.097	198.25	119.755
trpm3	chr19_22715279_22715308	4527.87	205.845	187.144	231.7	132.305	0	0	0	0	0	0	0	0	0	0	0	0	0	0	0	203.739	9729.9	3185.46	2600.78	47780.6	11.8245	6201.26	14.8814	0	0	0	0	0	0	0	0	0	0	0	0	0	0	150.679	37.7742	49.5625	23.9511
lrp2	chr2_69536076_69536105	88.7818	233.462	266.927	332.826	234.925	9.32726	0	0	0	0	0	0	0	0	0	0	0	0	0	0	246.388	0	0	0	0	0	0	0.256576	0	0	0	0	0	0	0	0	0	0	0	0	0	0	150.679	37.7742	148.687	23.9511
thrsp	chr7_97417278_97417307	221.955	213.005	161.141	165.271	71.7555	0	0	0	68.704	0	0	0	0	0	0	0	0	0.481508	0	0	173.839	468.911	219.687	209.259	2056.98	1.54233	469.003	0.769727	0	0	0	0	0	0	0	0	0	0	0	0	0	0	75.3397	75.5484	0	23.9511
tat	chr8_109994636_109994665	133.173	271.562	285.641	238.091	296.458	0	7750.58	0	0	0	0	0	0	0	0	0	0	0	0	0	339.334	234.456	0	59.7881	0	0	208.446	0.256576	0	0	0	0	0	0	0	0	0	0	0	0	0	0	75.3397	0	99.1249	95.8043
syne1	chr10_5342239_5342268	44.3909	229.115	279.535	163.902	415.395	0	0	0	68.704	0	0	0	0	0	0	0	0	0	0	0	197.249	0	0	0	0	0.257055	52.1114	0.256576	0	0	0	0	0	0	0	0	0	0	0	0	0	0	75.3397	75.5484	99.1249	23.9511
nrxn1	chr17_91088317_91088346	621.473	250.083	256.88	277.583	480.663	0	50.9907	0	0	0	0	0	0	0	0	0	0	0	0.588496	0	388.009	1758.42	659.06	328.835	5050.2	1.79938	625.337	2.56576	0	0	0	0	0	0	0	0	0	0	0	0	0	0	150.679	37.7742	148.687	742.483
sorbs1	chr19_40361455_40361484	44.3909	250.85	277.171	109.572	237.874	0	0	0	0	0	0	0	0	0	0	0	0	0	0	0	136.29	0	109.843	29.8941	1.23676	0	0	457.731	0	0	0	0	0	0	0	0	0	0	0	0	0	0	75.3397	75.5484	0	95.8043
myh11	chr16_14226483_14226512	133.173	261.078	257.471	181.022	172.803	0	0	0	0	0	0	0	0	0	0	0	0	0	0.588496	0	201.19	0	0	0	0.247353	0	104.223	0.513151	0	0	0	0	0	0	0	0	0	0	0	0	0	0	226.019	37.7742	49.5625	47.9021
krt14	chr11_100205671_100205700	88.7818	249.06	200.146	271.648	147.639	0	0	0	0	0	0	0	0	0	0	0	0	0	0	0	245.229	117.228	0	59.7881	216.186	0	52.1114	0.256576	0	0	0	0	0	0	0	0	0	0	0	0	0	0	226.019	75.5484	49.5625	23.9511
cav1	chr6_17339126_17339155	7013.76	69.5527	75.8427	90.6254	81.9782	0	50.9907	0	68.704	0	0	0	0	0	0	0	0	0	0	0	42.4168	586.139	0	0	0	0	104.223	0	0	0	0	0	0	0	0	0	0	0	0	0	0	0	75.3397	0	49.5625	71.8532
dlk2	chr17_46302470_46302499	221.955	225.279	197.585	214.351	411.857	0	0	0	0	0	0	0	0	0	0	0	0	0.963017	0	0	357.645	117.228	219.687	89.6822	0.247353	0	52.1114	0.256576	0	0	0	0	0	0	0	0	0	0	0	0	0	0	150.679	37.7742	0	23.9511
cacna1e	chr1_154486594_154486623	5948.38	161.096	175.522	61.6344	193.248	0	0	0	0	0	0	0	0	0	0	0	0	0	0	0	114.502	117.228	0	119.576	1.48412	1.02822	990.117	1.79603	6829.1	37.6935	0	0	0	0	0	0	0	0	0	0	0	0	75.3397	0	49.5625	0
ankrd53	chr6_83765268_83765297	88.7818	356.202	437.327	359.077	264.217	0	0	0	0	0	0	0	0	0	0	0	0	0	0	0	414.433	0	0	89.6822	21.025	0.514109	52.1114	0.256576	0	0	0	0	0	0	0	0	0	0	0	0	0	0	75.3397	37.7742	0	0
slco1a5	chr6_142250205_142250234	44.3909	254.43	262.002	145.868	435.644	0	0	0	0	0	0	0	0	0	0	0	0	0	0	0	314.765	0	0	29.8941	0.247353	0	104.223	177.294	0	0	0	0	0	0	0	0	0	0	0	0	0	0	75.3397	37.7742	49.5625	23.9511
mdn1	chr4_32676794_32676823	399.518	17.8996	372.516	0	0	0	0	0	0	0	0	0	0	0	0	0	0	0	0	0	102.913	1641.19	768.903	149.47	4984.65	0.771164	677.448	0.769727	0	0	0	0	0	0	0	0	0	0	0	0	0	0	75.3397	0	99.1249	0
kmt2c	chr5_25351044_25351073	1598.07	132.713	138.093	255.897	241.216	0	0	0	68.704	0	0	0	0	0	0	0	0	0	0	0	173.607	0	0	0	0.247353	0.257055	52.1114	0.256576	0	0	0	0	0	0	0	0	0	0	0	0	0	0	75.3397	0	49.5625	23.9511
acsm5	chr7_119540658_119540687	44.3909	298.667	297.855	252.473	213.3	0	50.9907	0	68.704	0	0	0	0	0	0	0	0	0	0	0	312.447	117.228	0	0	0.247353	0	0	0.256576	0	0	0	0	0	0	0	0	0	0	0	0	0	0	226.019	37.7742	99.1249	47.9021
arhgap20	chr9_51765552_51765581	44.3909	206.868	276.186	241.744	660.15	0	0	0	68.704	0	0	4012.54	0	0	0	0	0	0	0.588496	0	337.48	0	0	29.8941	0.247353	0	0	0.256576	0	0	0	0	0	0	0	0	0	0	0	0	14.101	0	75.3397	151.097	99.1249	47.9021
dpt	chr1_164808920_164808949	2086.37	422.942	297.855	248.592	554.974	9.32726	101.981	0	68.704	0	0	0	0	0	0	0	0	0	0	0	319.4	0	0	0	0	0.257055	156.334	0	0	0	0	0	0	0	0	0	0	0	0	0	0	0	75.3397	0	49.5625	0
masp1	chr16_23514013_23514042	399.518	534.942	422.749	395.145	531.384	0	0	0	0	0	0	0	0	0	0	0	0	0	0	0	492.081	234.456	109.843	59.7881	0.247353	0	104.223	0.513151	0	0	0	0	0	0	0	0	0	0	0	0	0	0	150.679	113.323	247.812	23.9511
pclo	chr5_14679529_14679558	2263.94	171.325	146.958	148.607	206.027	0	0	0	0	0	0	0	0	0	0	0	0	0.481508	0.588496	0	161.323	2813.47	2855.93	1255.55	3.95764	18596.4	2240.79	6.92754	0	0	0	0	0	0	0	0	0	0	0	0	0	0	75.3397	37.7742	99.1249	47.9021
pkhd1l1	chr15_44514891_44514920	88.7818	101.261	65.796	130.802	0	0	0	0	0	0	0	0	0	0	0	0	0	0	0	0	89.2374	0	0	29.8941	0	0.257055	0	0	0	0	0	0	0	0	0	0	0	0	0	0	0	0	75.3397	0	0	0
neb	chr2_52288793_52288822	44.3909	320.147	203.495	346.979	408.908	0	0	0	0	0	0	0	0	0	0	0	0	0.963017	0	0	219.037	0	0	0	0	0	0	0	0	0	0	0	0	0	0	0	0	0	0	0	0	0	452.038	75.5484	0	47.9021
dicer1	chr12_104705062_104705091	2841.02	48.5846	260.032	0	0	0	0	0	0	0	0	0	0	0	0	0	0	0	0	0	200.494	117.228	109.843	89.6822	1.73147	0	104.223	692.241	0	0	0	0	0	0	0	0	0	0	0	0	0	0	75.3397	37.7742	49.5625	0
cmtm5	chr14_54937960_54937989	88.7818	235.252	126.273	280.551	86.4997	9.32726	0	0	0	0	0	0	0	0	0	0	0	0	0	0	216.488	117.228	0	29.8941	0	0	0	0	0	0	0	0	0	0	0	0	0	0	0	0	0	0	75.3397	37.7742	0	0
bmp3	chr5_98855222_98855251	133.173	401.974	454.071	252.016	226.472	27.9818	0	0	0	0	0	0	0	0	0	0	0	0.963017	0	0	368.771	117.228	0	0	0	0.257055	52.1114	0	0	0	0	0	0	0	0	0	0	0	0	0	0	0	150.679	151.097	0	23.9511
fgf2	chr3_37348937_37348966	44.3909	178.485	151.685	239.004	78.4395	0	0	0	206.112	0	0	0	0	0	0	0	0	0	0	0	127.714	0	0	0	0	0	52.1114	0	0	0	0	0	0	0	0	0	0	0	0	0	0	0	0	0	49.5625	23.9511
adh1	chr3_138280491_138280520	88.7818	480.988	409.551	611.55	381.385	18.6545	0	0	68.704	0	0	0	0	0	0	0	0	0.481508	0.588496	1.47628	446.882	351.683	0	0	0.742058	0.514109	104.223	0	0	0	0	0	0	0	0	0	17.6688	0	0	0	0	0	0	113.323	148.687	47.9021
lmod1	chr1_135363979_135364008	88.7818	207.891	231.074	201.567	103.407	0	0	0	68.704	0	0	0	0	0	0	0	0	0	0	0	197.713	0	0	0	0	0.514109	0	0	0	0	0	0	0	0	0	0	0	0	0	0	0	0	150.679	0	0	95.8043
ndufa1	chrX_37189915_37189944	266.345	36.3106	98.3	12.3269	0	0	0	0	0	0	0	0	0	0	0	0	0	0	0	0	94.8003	351.683	219.687	59.7881	1933.31	1.02822	312.668	0.256576	0	0	0	0	0	0	0	0	0	0	0	0	0	0	0	0	49.5625	0
sostdc1	chr12_36317230_36317259	3551.27	409.134	257.865	335.793	299.604	0	0	0	68.704	0	0	0	0	0	0	0	0	1.44453	1.17699	0	372.479	5392.48	3844.52	1405.02	8.40999	28803.7	3804.13	11.8025	0	0	0	0	0	0	0	0	0	0	0	0	0	0	226.019	0	49.5625	23.9511
hba-a1	chr11_32283732_32283761	88.7818	466.412	526.368	225.08	187.547	0	0	0	137.408	0.928573	0	0	11125.2	6.25128	6.49467	46.0895	0	0	1.17699	0	805.918	0	109.843	59.7881	26.7141	0	208.446	0	0	0	0	0	0	0	0	0	0	0	0	0	0	0	150.679	75.5484	0	47.9021
ovch2	chr7_107796519_107796548	44.3909	170.046	140.457	3866.76	91.0213	9.32726	0	0	0	0	0	0	0	0	0	0	0	0	0	0	172.448	0	0	59.7881	0	60.9219	0	0.256576	0	0	0	0	0	0	0	0	0	0	0	0	0	0	828.736	226.645	545.187	215.56
gata3	chr2_9877531_9877560	177.564	256.22	274.413	58.4385	106.749	0	0	0	0	0	0	0	0	0	0	0	0	0	0	0	330.063	117.228	0	29.8941	0.247353	0	52.1114	0	0	0	0	0	0	0	0	0	0	0	0	0	0	0	0	0	49.5625	23.9511
fosb	chr7_19307274_19307303	88.7818	270.028	247.031	317.075	272.867	0	0	0	0	0	0	0	0	0	0	0	0	0.963017	0.588496	0	299.235	0	0	0	0	0	52.1114	0.256576	0	0	0	0	0	0	0	0	0	0	0	0	0	0	452.038	113.323	0	23.9511
lcn10	chr2_25684074_25684103	221.955	179.763	231.468	181.707	169.854	0	0	0	137.408	0	0	0	0	0	0	0	0	0.481508	0	0	228.077	117.228	219.687	89.6822	95.7255	0.771164	156.334	864.403	0	0	0	0	0	0	0	0	0	0	0	0	0	0	150.679	37.7742	49.5625	23.9511
ptn	chr6_36743428_36743457	88.7818	260.567	243.879	48.6227	23.5908	0	0	0	137.408	0	0	0	0	0	0	0	0	0	0	0	454.3	0	109.843	0	28.9403	0.257055	0	0.256576	0	0	0	0	0	0	0	0	0	0	0	0	0	0	0	37.7742	0	23.9511
notch2	chr3_98120723_98120752	133.173	496.586	335.875	755.82	557.334	0	50.9907	0	137.408	0	0	0	0	0	0	0	0	0.481508	0	0	240.13	0	28559.3	0	0.247353	0	52.1114	0	96.1845	0	0	0	0	0	0	0	0	0	0	0	0	0	376.698	188.871	247.812	119.755
pld5	chr1_175993840_175993869	44.3909	68.2742	78.2066	32.4151	316.117	0	0	0	0	0	0	0	0	0	0	0	0	0.481508	0	0	65.5953	0	0	0	0	0	0	0.256576	0	0	0	0	0	0	0	0	0	0	0	0	0	0	75.3397	0	99.1249	0
atoh8	chr6_72234459_72234488	177.564	143.708	215.906	157.967	135.844	18.6545	152.972	0	68.704	0	0	0	0	0	0	0	0	0.963017	0	0	115.197	1055.05	109.843	29.8941	543.681	0	104.223	0	5001.59	0	0	0	0	0	0	0	0	0	0	0	0	0	75.3397	113.323	96052	71.8532
myzap	chr9_71550246_71550275	88.7818	140.895	187.932	87.4295	77.8498	9.32726	0	0	0	0	0	0	0	0	0	0	0	0	0	0	175.925	0	0	0	0	0	0	0	0	0	0	0	0	0	0	0	0	0	0	0	0	0	96962.2	0	49.5625	23.9511
xirp2	chr2_67511288_67511317	88.7818	177.462	123.515	254.527	592.327	0	0	0	0	0	0	0	0	0	0	0	0	0	0.588496	0	238.276	117.228	0	0	0.247353	0	0	38.2298	0	0	0	0	0	0	0	0	0	0	0	0	0	0	301.359	37.7742	0	71.8532
slc25a27	chr17_43664073_43664102	44.3909	148.567	129.819	74.1895	168.674	0	0	0	0	0	0	0	0	0	0	0	0	0	0	0	238.276	0	109.843	0	88.7996	0	104.223	0	0	0	0	0	0	0	0	0	0	0	0	0	0	0	75.3397	37.7742	49.5625	23.9511
mrps24	chr11_5707307_5707336	44.3909	28.6393	117.014	0.456551	0.19659	0	0	0	0	0	0	0	0	0	0	0	0	0	0	0	220.428	117.228	0	0	0	0.257055	0	0.256576	0	0	0	0	0	0	0	0	0	0	0	0	0	0	0	37.7742	0	0
trp53	chr11_69588698_69588727	177.564	309.919	281.308	302.693	366.248	18.6545	0	3.4318	0	0	0	0	0	0	0	0	0	0	1.17699	0	215.329	351.683	0	119.576	46.7497	0.514109	13288.4	0	721.384	37.6935	0	0	74.3683	0	0	0	0	0	0	0	0	0	51306.3	113.323	99.1249	23.9511
b3galt1	chr2_68118397_68118426	133.173	219.654	210.193	129.432	253.012	0	0	0	0	0	0	0	0	0	0	0	0	0	0	0	39.4035	351.683	219.687	119.576	1.97882	1.54233	312.668	2149.33	0	0	0	0	0	0	0	0	0	0	0	0	0	0	150.679	37.7742	99.1249	71.8532
tpo	chr12_30105965_30105994	44.3909	235.252	148.337	341.728	46.1987	0	0	0	0	0	0	0	0	0	0	0	0	0	0	0	247.083	117.228	109.843	29.8941	0	0	52.1114	0	0	0	2.2401	0	0	0	0	0	0	0	0	0	0	0	75.3397	75.5484	49.5625	23.9511
ntrk3	chr7_78460554_78460583	133.173	288.695	269.094	228.504	322.998	9.32726	0	0	137.408	0	0	0	0	0	0	0	0	0	0	0	351.387	117.228	109.843	29.8941	0	0.257055	52.1114	0.256576	0	0	0	0	0	0	0	0	0	0	0	0	0	0	75.3397	37.7742	49.5625	71.8532
cacna1e	chr1_154486653_154486682	4128.36	39.6348	125.682	113.453	77.26	9.32726	0	0	0	0	0	0	0	0	0	0	0	0	0	0	125.628	117.228	0	0	0	0	0	0	0	0	0	0	0	0	0	0	0	0	0	0	0	0	75.3397	0	0	71.8532
kcnb1	chr2_167188058_167188087	44.3909	276.165	230.483	118.932	556.351	9.32726	0	0	0	0	0	0	0	0	0	0	0	0	0.588496	0	138.84	0	0	29.8941	6.67852	0	0	0	0	0	0	0	0	0	0	0	0	0	0	0	0	0	150.679	37.7742	49.5625	47.9021
ptchd1	chrX_155586472_155586501	88.7818	152.402	176.901	176.913	217.036	0	0	0	0	0	0	0	0	0	0	0	0	0	0	0	209.998	117.228	0	89.6822	52.6861	0	52.1114	0	0	0	0	0	0	0	0	0	0	0	0	0	0	0	0	37.7742	99.1249	71.8532
dlk2	chr17_46301744_46301773	2707.85	330.631	220.633	463.399	250.653	0	0	0	0	0	0	0	0	0	0	0	0	0	0	0	442.015	3282.38	2855.93	1554.49	8.40999	25971.5	2657.68	8.467	48.0922	0	0	0	0	0	0	0	0	0	0	0	0	0	226.019	37.7742	49.5625	47.9021
b3galt1	chr2_68118081_68118110	621.473	163.909	152.867	87.886	168.871	9.32726	50.9907	0	0	0	0	0	0	0	0	0	0	0	0	0	107.317	820.594	768.903	209.259	2.96823	1.54233	521.114	4079.55	0	0	0	0	0	0	0	0	0	0	0	0	0	0	75.3397	0	0	71.8532
1500015o10rik	chr1_43738629_43738658	177.564	155.215	212.36	85.1467	533.546	0	4487.18	343.18	26588.4	0.928573	0	0	0	6.25128	19.484	1336.59	0	0	1474.18	126706	248.011	0	0	59.7881	0.247353	0	104.223	0	0	1733.9	0	145.986	0	0	0	0	971.782	0	3942.09	16.378	28.2019	0	75.3397	0	148.687	23.9511
tnxb	chr17_34715935_34715964	44.3909	214.795	321.691	293.79	495.801	9.32726	0	0	68.704	0	0	0	0	0	0	0	0	0	628.514	0	298.772	234.456	0	0	0	0.257055	104.223	0	0	0	0	0	0	0	0	0	0	0	0	0	0	0	0	0	99.1249	71.8532
dnah9	chr11_66095229_66095258	88.7818	129.644	126.273	35.8392	217.822	9.32726	0	0	0	0	0	0	0	0	0	0	0	0	0	0	123.542	0	0	29.8941	0.247353	0	0	0	0	0	0	0	0	0	0	0	0	0	0	0	0	0	0	0	49.5625	0
setd2	chr9_110550996_110551025	399.518	67.507	73.2818	26.0234	39.9078	0	0	0	137.408	0	0	0	0	0	0	0	0	0.481508	0	0	66.5224	351.683	439.373	328.835	3696.69	1.28527	364.78	1.0263	0	0	0	0	0	6725.02	0	0	0	0	0	0	0	0	0	0	0	23.9511
fat2	chr11_55311088_55311117	133.173	173.37	115.045	245.624	201.898	0	0	0	0	0	0	0	0	0	0	0	0	0.481508	0	0	236.653	468.911	109.843	89.6822	1306.52	1.28527	312.668	0.513151	0	0	0	0	0	0	0	0	0	0	0	0	0	0	0	75.5484	49.5625	95.8043
spen	chr4_141493499_141493528	355.127	517.043	340.8	1564.14	687.673	0	0	0	0	0	0	0	0	0	0	0	0	0	1.17699	0	288.109	586.139	439.373	209.259	35.8661	1783.96	364.78	1657.48	0	0	0	0	0	0	0	0	0	0	0	0	0	0	301.359	151.097	247.812	23.9511
ak5	chr3_152615995_152616024	44.3909	312.22	365.818	274.844	397.899	0	0	0	68.704	0.928573	31.6312	27.962	12.3112	20091.6	12.9893	0	145.986	0	0.588496	0	432.048	117.228	0	29.8941	0	0	104.223	0	0	0	1.12005	583.942	111.552	68.9746	0	10.3768	0	0	328.507	0	42.3029	0	226.019	75.5484	396.5	191.609
pnpt1	chr11_29138186_29138215	44.3909	74.4112	172.764	0.228275	32.634	0	0	0	137.408	0	0	0	0	0	0	0	0	0	0	0	211.852	0	0	0	0.247353	0	0	0.256576	0	0	0	0	0	0	0	0	0	0	0	0	0	0	0	0	49.5625	23.9511
runx1	chr16_92644331_92644360	44.3909	151.124	201.722	262.288	184.598	0	0	0	0	0	0	0	0	0	0	0	0	0	0	0	198.64	0	0	29.8941	0	0	52.1114	0	0	0	0	0	0	0	0	0	0	0	0	0	0	0	75.3397	113.323	49.5625	23.9511
ptn	chr6_36743404_36743433	577.082	293.553	393.791	184.675	159.828	9.32726	50.9907	0	68.704	0	0	0	0	0	0	0	0	0	0	0	238.507	234.456	549.217	119.576	1760.41	0	208.446	0.769727	0	0	0	0	0	0	0	0	0	0	0	0	0	0	0	75.5484	0	95.8043
lrrc3b	chr14_15358535_15358564	44.3909	261.845	257.274	284.431	136.63	0	0	0	137.408	0	0	0	0	0	0	0	0	0	0	0	126.787	0	0	0	3.46294	0	156.334	1.0263	0	0	0	0	0	0	0	0	0	0	0	0	0	0	38799.9	0	99.1249	119.755
cacna1e	chr1_154472670_154472699	44.3909	173.37	138.684	370.491	264.217	18.6545	0	0	68.704	0	0	0	0	0	0	0	0	0	0	0	330.99	0	109.843	29.8941	0.247353	0	0	0	0	0	0	0	0	0	0	0	0	0	0	0	0	0	0	0	99.1249	95.8043
klhl29	chr12_5137802_5137831	44.3909	217.352	380.002	166.185	470.637	0	0	0	0	0	0	0	0	0	0	0	0	0	0.588496	0	219.037	0	0	0	25.7247	0	0	0	0	0	0	0	0	0	0	0	0	0	0	0	0	0	301.359	75.5484	49.5625	47.9021
sertm1	chr3_54899546_54899575	44.3909	197.663	191.675	130.345	44.2328	9.32726	0	0	0	0	0	0	0	0	0	0	0	0.481508	0	0	161.323	117.228	0	0	0	0	104.223	0	0	0	0	0	0	0	0	0	0	0	0	0	0	0	0	75.5484	0	0
fhl1	chrX_56789869_56789898	44.3909	200.475	264.957	145.868	296.262	0	0	0	0	0	0	0	0	0	0	0	0	0	0	0	151.82	0	0	0	0	0	0	0	0	0	0	0	0	0	0	0	0	0	0	0	0	0	75.3397	37.7742	49.5625	0
klhl31	chr9_77655755_77655784	88.7818	247.526	280.914	101.583	435.251	0	0	0	137.408	0	0	0	0	0	0	0	0	0	0	0	358.34	234.456	0	119.576	0.247353	0	0	0.769727	0	0	0	0	0	0	0	0	0	0	0	0	0	0	150.679	75.5484	148.687	47.9021
aqp7	chr4_41034781_41034810	44.3909	121.973	92.5872	63.4606	53.4726	0	0	0	0	0	0	0	0	0	0	0	0	0	0	0	46.1253	117.228	0	29.8941	0	0	0	0	0	0	0	0	0	0	0	0	0	0	0	0	0	0	0	37.7742	0	0
oca2	chr7_56297138_56297167	44.3909	79.0139	135.532	39.9482	14.9409	9.32726	0	0	68.704	0	20070	0	0	0	6.49467	0	0	0	0	0	171.29	0	0	0	0.247353	0.257055	416.891	0	1490.86	0	0	0	0	0	0	0	0	0	0	0	0	0	0	0	0	47.9021
tenm1	chrX_42578334_42578363	577.082	234.485	253.728	310.683	91.6111	27.9818	0	0	0	0	0	0	0	0	0	0	0	0.963017	0	0	367.844	703.367	1427.96	567.987	13.1097	6.94047	781.671	7552.56	0	0	0	0	0	0	0	0	0	0	0	0	0	0	150.679	37.7742	198.25	47.9021
slc13a2	chr11_78404655_78404684	177.564	226.813	316.963	306.346	228.831	9.32726	0	0	0	0	0	0	0	0	0	0	0	0.963017	0	0	297.149	0	0	0	0	0.257055	52.1114	0	0	0	0	0	0	0	0	0	0	0	0	0	0	0	150.679	113.323	99.1249	23.9511
klk5	chr7_43847153_43847182	44.3909	100.238	105.195	151.575	238.661	9.32726	0	0	0	0	0	0	0	0	0	0	0	0.963017	0	0	88.0785	0	0	0	0	0.257055	0	0	0	0	0	0	0	0	0	0	0	0	0	0	0	0	75.3397	75.5484	49.5625	0
cntnap2	chr6_46484024_46484053	577.082	187.946	188.917	208.187	478.894	0	0	0	274.816	0	0	0	0	0	0	0	0	0	0	0	219.501	234.456	439.373	328.835	4051.64	0.514109	521.114	1.79603	0	0	0	0	0	0	0	0	0	0	0	0	0	0	150.679	75.5484	148.687	71.8532
rergl	chr6_139496500_139496529	266.345	106.886	161.732	133.313	108.518	0	0	0	68.704	0	0	0	0	0	0	0	0	0	0.588496	0	195.627	703.367	109.843	89.6822	1597.4	0.257055	156.334	0.256576	0	0	0	0	0	0	0	0	0	0	0	0	0	0	0	37.7742	99.1249	0
tnmd	chrX_133865272_133865301	88.7818	104.329	54.5674	111.627	83.5509	0	0	0	68.704	0	0	0	0	0	0	0	0	0.963017	0.588496	0	85.7606	234.456	219.687	59.7881	34.382	0.771164	469.003	1680.83	0	0	0	0	0	0	0	0	0	0	0	0	0	0	0	0	99.1249	23.9511
abcb5	chr12_118927228_118927257	177.564	229.626	278.156	108.887	94.7565	9.32726	0	0	137.408	0	0	0	0	0	0	0	0	0.481508	0	0	228.077	351.683	0	149.47	1185.81	0	208.446	0.769727	0	0	0	0	0	0	0	0	0	0	0	0	0	0	0	0	99.1249	71.8532
pcdh9	chr14_93888050_93888079	44.3909	204.055	99.482	62.5475	611.789	0	0	0	0	0	0	0	0	0	0	0	0	0	0	0	76.9528	117.228	109.843	0	0	0.257055	0	0	0	0	0	0	0	0	0	0	0	0	0	0	0	0	75.3397	0	198.25	47.9021
scara5	chr14_65689765_65689794	88.7818	240.366	153.064	257.951	49.5408	0	101.981	0	206.112	0	0	0	0	0	0	0	0	610.553	0.588496	0	295.99	4689.11	109.843	29.8941	0	0	5888.59	0	673.291	0	0	0	37.1841	0	0	0	0	3.49327	0	0	0	61.8395	150.679	75.5484	148.687	0
crtac1	chr19_42323706_42323735	266.345	197.407	218.072	144.498	408.318	0	50.9907	0	0	0	0	0	0	0	0	0	0	0.481508	0	0	424.863	586.139	219.687	149.47	335.163	1172.17	521.114	0.513151	0	0	0	0	0	0	0	0	0	0	0	0	0	0	150.679	0	99.1249	47.9021
capn6	chrX_143807948_143807977	177.564	133.224	126.864	17.8055	0	0	0	0	0	0	0	0	0	0	0	0	0	0	0	0	149.965	117.228	0	0	0	210.271	0	0	0	0	0	0	0	0	0	0	0	0	0	0	0	0	0	0	0	0
nrxn1	chr17_91088082_91088111	88.7818	391.49	291.748	153.629	167.495	9.32726	0	0	0	0	0	0	0	0	0	0	0	0	0	0	364.367	117.228	219.687	59.7881	94.7361	0	52.1114	0.256576	0	0	0	0	0	0	0	0	0	0	0	0	0	0	0	113.323	49.5625	23.9511
foxa1	chr12_57542732_57542761	44.3909	352.878	442.646	161.391	357.205	9.32726	0	0	0	0	0	0	0	0	0	0	0	0	0	0	415.36	234.456	0	298.941	0	0	0	10.5196	0	0	0	0	0	0	0	0	0	0	0	0	0	0	0	37.7742	148.687	23.9511
pparg	chr6_115422150_115422179	88.7818	185.644	171.779	67.5695	195.018	0	0	0	0	0	0	0	0	0	0	0	0	0	0	0	349.533	0	0	59.7881	339.615	0.257055	0	0.256576	0	0	0	0	0	0	0	0	0	0	0	0	0	0	150.679	0	49.5625	23.9511
dct	chr14_118040491_118040520	88.7818	334.467	194.039	482.118	167.102	0	0	0	0	0	0	0	0	0	0	0	0	0	0	0	287.182	0	0	59.7881	0	0	104.223	0	0	0	0	0	0	0	0	0	0	0	0	0	0	0	150.679	0	247.812	23.9511
nbea	chr3_55955443_55955472	88.7818	331.654	255.501	123.725	672.929	0	50.9907	0	0	0	0	0	0	0	0	0	0	0	0	0	355.095	0	109.843	0	16.82	0	52.1114	0.256576	0	0	0	0	0	0	0	0	0	0	0	0	0	0	226.019	75.5484	99.1249	47.9021
ptch1	chr13_63541163_63541192	44.3909	210.448	229.301	125.551	273.457	0	0	0	68.704	0	0	0	0	0	0	0	0	0	0	0	306.652	0	219.687	0	0.247353	0	104.223	0	0	0	0	0	0	0	0	0	0	0	0	0	0	0	0	37.7742	0	71.8532
lyve1	chr7_110859444_110859473	88.7818	250.339	163.308	65.0585	167.102	0	0	0	0	0	0	0	0	0	0	0	0	0	0	0	139.998	0	0	29.8941	14.8412	196.133	0	0	0	0	0	0	0	0	0	0	0	0	0	0	0	0	0	37.7742	49.5625	71.8532
pygm	chr19_6384657_6384686	310.736	242.667	252.743	38.3503	273.064	0	0	0	0	0	0	0	0	0	0	0	0	0	0	0	182.415	468.911	109.843	119.576	1.97882	1862.1	312.668	1.0263	0	0	0	0	0	0	0	0	0	0	0	0	0	0	75.3397	0	148.687	23.9511
csmd3	chr15_48313897_48313926	44.3909	356.202	364.439	196.545	308.45	0	0	0	0	0	0	0	0	0	0	0	0	0	0	0	298.54	0	219.687	59.7881	56.3964	0.771164	52.1114	635.281	0	0	0	0	0	0	0	0	0	0	0	0	0	0	226.019	75.5484	49.5625	47.9021
sdhb	chr4_140972897_140972926	133.173	88.4751	82.3435	0.684826	83.3543	0	0	0	137.408	0	0	0	0	0	0	0	0	0	0	0	177.548	117.228	219.687	0	0	0	0	0.256576	0	0	0	0	0	0	0	0	0	0	0	0	0	0	0	0	49.5625	0
matn2	chr15_34388796_34388825	1820.03	123.507	204.677	115.279	111.467	0	0	0	0	0	0	0	0	0	0	0	0	0	0	0	156.455	3282.38	2746.08	986.504	7.42058	17343.7	2188.68	6.67097	0	0	0	0	0	0	0	0	0	0	0	0	0	0	226.019	75.5484	32166	23.9511
lgr6	chr1_135104924_135104953	133.173	216.074	183.598	205.676	139.972	0	0	0	0	0	0	0	0	0	0	0	0	0.481508	0	0	356.254	0	0	29.8941	0	0	0	0.256576	0	0	0	0	0	0	0	0	0	0	0	0	0	0	0	75.5484	49.5625	47.9021
timp4	chr6_115251631_115251660	44.3909	211.471	181.629	145.868	310.22	0	50.9907	0	0	0	0	0	0	0	0	0	0	0.481508	0.588496	0	166.654	0	0	0	0.494705	0	0	0	0	0	1.12005	0	0	0	0	0	0	0	0	0	0	0	0	0	198.25	0
usp44	chr10_93846410_93846439	266.345	295.088	228.71	184.903	483.416	0	0	0	68.704	0	0	0	0	0	0	0	0	0	0.588496	0	385.459	820.594	329.53	448.411	2.22617	3889.23	469.003	1.79603	0	0	0	0	0	0	0	0	0	0	0	0	0	0	150.679	37.7742	49.5625	0
meox2	chr12_37109245_37109274	177.564	278.211	248.607	78.2985	161.007	0	0	0	0	0	0	0	0	0	0	0	0	0.481508	0	0	459.862	117.228	109.843	29.8941	39.3291	0	104.223	0.513151	0	0	0	0	0	0	0	0	0	0	0	0	0	0	75.3397	0	49.5625	0
sfrp1	chr8_23411857_23411886	88.7818	366.43	279.338	411.352	252.422	9.32726	0	0	137.408	0	0	0	0	0	0	0	0	0.481508	1.17699	0	250.792	0	0	0	0	0.257055	0	0	0	0	0	0	0	0	0	0	0	0	0	0	0	0	0	37.7742	99.1249	0
clec3b	chr9_123156893_123156922	88.7818	375.124	297.067	300.182	234.139	0	0	0	137.408	0	0	0	0	0	0	0	0	0	0	0	537.742	0	0	0	0	0.257055	104.223	0.256576	0	0	0	0	0	0	0	0	0	0	0	0	0	0	150.679	0	99.1249	71.8532
dst	chr1_34218370_34218399	88.7818	178.996	239.742	126.236	295.475	0	0	0	206.112	0	0	0	0	0	0	0	0	0	0	0	336.089	0	109.843	59.7881	0	0.257055	52.1114	0	0	0	0	0	0	0	0	0	0	0	0	0	0	0	75.3397	0	0	0
actg2	chr6_83526862_83526891	44.3909	253.919	278.353	218.688	162.973	0	0	0	68.704	0	0	0	0	0	0	0	0	0	0	0	382.678	117.228	0	119.576	0.247353	0.257055	52.1114	0	0	0	0	0	0	0	0	0	0	0	0	0	0	0	75.3397	0	148.687	143.706
csn3	chr5_87929818_87929847	1553.68	203.288	243.485	179.881	319.066	0	0	6.8636	68.704	0	0	0	0	0	0	0	0	0.963017	0	1.47628	199.104	1758.42	768.903	418.517	2.72088	8230.63	990.117	2.56576	0	0	0	0	0	0	0	0	35.3375	0	0	0	0	0	150.679	75.5484	49.5625	23.9511
ptprd	chr4_76136842_76136871	44.3909	199.453	223.588	93.5929	238.661	0	0	0	68.704	0	0	0	0	0	0	0	0	0.481508	0	0	275.825	117.228	0	59.7881	0.247353	0	52.1114	0	0	0	0	0	0	0	0	0	0	0	0	0	0	0	75.3397	75.5484	0	0
astn1	chr1_158511060_158511089	44.3909	530.339	461.951	535.534	385.317	0	0	0	0	0	0	0	0	0	0	0	0	0.481508	0	0	269.335	234.456	0	0	0	0	104.223	0	0	0	0	0	0	0	0	0	0	0	0	0	0	0	150.679	113.323	148.687	95.8043
pde2a	chr7_101484550_101484579	44.3909	104.84	136.123	168.011	69.0032	0	50.9907	0	0	0	0	0	0	0	0	0	0	0	0	0	335.857	117.228	109.843	0	0.247353	0.257055	0	0.256576	0	0	0	0	0	0	0	0	0	0	0	0	0	0	0	0	49.5625	0
slc7a3	chrX_101082796_101082825	88.7818	476.129	346.513	244.255	483.022	9.32726	0	0	0	0	0	0	0	0	0	0	0	0.481508	0.588496	0	413.505	0	109.843	0	0.247353	0.257055	0	0.256576	0	0	0	0	0	0	0	0	0	0	0	0	0	0	301.359	0	49.5625	47.9021
cdh20	chr1_104994269_104994298	88.7818	311.197	217.875	60.9495	417.754	18.6545	0	0	0	0	0	0	0	0	0	0	0	0	0	0	227.845	117.228	0	29.8941	0	0	104.223	0	0	0	0	0	0	0	0	0	0	0	0	0	0	0	75.3397	37.7742	148.687	23.9511
ngfr	chr11_95578160_95578189	133.173	321.937	427.871	332.597	300.587	0	0	0	0	0	0	0	0	0	0	0	0	0	0	0	429.962	234.456	109.843	119.576	78.4108	0	52.1114	0.256576	0	0	0	0	0	0	0	0	0	0	0	0	0	0	150.679	113.323	0	119.755
smad4	chr18_73641869_73641898	1464.9	294.065	248.213	1662.53	551.632	0	0	0	0	0	0	0	0	0	0	0	0	0	0	0	230.163	3282.38	549.217	508.199	9668.27	3.08465	1354.9	4.61836	0	0	0	0	0	0	0	0	0	0	0	0	0	0	301.359	151.097	148.687	191.609
ep300	chr15_81628652_81628681	1109.77	28.1279	15.9565	0	0	0	0	0	0	0	0	0	0	0	0	0	0	0	0	0	36.1585	0	0	0	0	0	0	0	0	0	0	0	0	0	0	0	0	0	0	0	0	0	0	0	49.5625	0
krt14	chr11_100206998_100207027	44.3909	337.791	296.279	270.963	384.727	0	0	0	0	0	0	0	0	0	0	0	0	0	0	0	257.977	0	0	0	0	0	156.334	0	0	0	0	0	0	0	0	0	0	0	0	0	0	0	75.3397	113.323	99.1249	23.9511
edn3	chr2_174761629_174761658	88.7818	369.754	242.697	356.566	400.651	0	0	0	0	0	0	0	0	0	0	0	0	0	0	0	328.904	117.228	0	59.7881	30.177	0	104.223	0	0	0	0	0	0	0	0	0	0	0	0	0	0	0	75.3397	75.5484	99.1249	47.9021
alb	chr5_90461721_90461750	44.3909	359.526	447.768	320.499	342.264	0	0	0	137.408	0	0	0	0	0	0	0	0	0	0.588496	0	540.06	0	219.687	59.7881	0	0	104.223	0	0	0	0	0	0	0	0	0	0	0	0	0	0	0	150.679	37.7742	0	47.9021
map2k4	chr11_65735203_65735232	88.7818	196.64	215.709	30.3606	359.367	0	50.9907	0	0	0	0	0	0	0	0	0	0	0	0	0	135.363	0	0	0	0	0	0	0	0	0	0	0	0	0	0	0	0	0	0	0	0	0	75.3397	0	49.5625	0
pparg	chr6_115422171_115422200	88.7818	199.197	209.208	141.531	418.737	0	50.9907	0	0	0	0	0	0	0	0	0	0	0.481508	0	0	218.806	0	0	29.8941	0.247353	0	0	0	0	0	0	0	0	0	0	0	0	0	0	0	0	0	150.679	37.7742	99.1249	71.8532
arhgap36	chrX_49493412_49493441	621.473	166.21	134.941	55.4709	176.538	0	50.9907	0	0	0	0	0	0	0	0	0	0	0	0	0	104.767	1523.96	329.53	328.835	6597.14	1.54233	885.894	2.56576	0	0	0	0	0	0	0	0	0	0	0	0	0	0	75.3397	113.323	99.1249	0
rxrg	chr1_167631276_167631305	133.173	306.339	163.505	175.087	187.547	0	0	0	0	0	0	0	0	0	0	0	0	0.481508	0.588496	0	216.024	117.228	109.843	29.8941	0.247353	562.949	0	0	0	0	0	0	0	0	0	0	0	0	0	0	0	0	150.679	37.7742	99.1249	23.9511
krt14	chr11_100207312_100207341	88.7818	274.375	248.41	173.261	508.186	18.6545	0	0	0	0	0	0	0	0	0	0	0	0	0	0	344.897	0	0	0	0.247353	0	52.1114	0	0	0	0	0	0	0	0	0	0	0	0	0	0	0	226.019	75.5484	148.687	23.9511
dst	chr1_34191456_34191485	1020.99	175.672	150.503	188.099	6.48748	0	0	0	0	0	0	0	0	0	0	0	0	0	0	0	233.176	0	0	0	0	0	0	0.256576	0	0	0	0	0	0	0	0	0	0	0	0	0	0	150.679	37.7742	0	71.8532
pgm5	chr19_24750437_24750466	133.173	229.37	241.121	251.788	138.989	0	3773.31	0	68.704	0	0	0	0	0	0	0	0	0.481508	0	0	242.448	234.456	0	29.8941	0.247353	0	0	0	0	0	2.2401	0	0	0	0	0	0	0	0	0	0	0	75.3397	75.5484	49.5625	119.755
sfrp1	chr8_23417337_23417366	710.255	197.151	208.223	600.593	282.893	9.32726	0	0	0	0	0	0	0	0	0	0	0	0	0.588496	0	396.353	1641.19	768.903	717.458	8206.91	1.28527	1302.79	1.79603	0	0	0	0	0	0	0	0	0	0	0	0	0	0	75.3397	37.7742	49.5625	23.9511
cfd	chr10_79892063_79892092	44.3909	428.312	344.543	489.423	294.492	9.32726	101.981	0	68.704	0	0	0	0	0	0	0	0	0.481508	0	0	452.214	0	0	2959.51	0.247353	0	104.223	0.769727	0	0	0	0	0	0	0	0	0	0	0	0	0	0	75.3397	75.5484	148.687	23.9511
kat6b	chr14_21628847_21628876	44.3909	178.485	177.689	53.6447	243.772	0	0	0	0	0	0	0	0	0	0	0	0	0	0	0	72.5489	0	0	0	0	0	0	0	0	0	0	0	0	0	0	0	0	0	0	0	0	0	0	0	0	23.9511
mrgprb4	chr7_48198551_48198580	44.3909	142.685	126.667	76.7005	208.189	0	0	0	0	0	0	0	0	0	0	0	0	0	0	0	97.3499	0	219.687	0	0	0	0	0	0	0	0	0	0	0	0	0	0	0	0	0	0	0	0	75.5484	99.1249	47.9021
prex2	chr1_11199964_11199993	133.173	205.334	258.259	161.391	69.9862	0	0	0	0	0	0	0	0	0	0	0	0	0	0	0	167.117	117.228	0	29.8941	0	0	52.1114	0	48.0922	0	0	0	0	0	0	0	0	0	0	0	0	0	75.3397	37.7742	0	0
ctcf	chr8_105666760_105666789	44.3909	0	23.6393	0	0	0	0	0	0	0	0	0	0	0	0	0	0	0	0	0	2.31786	0	0	0	0	0	0	0	0	0	0	0	0	0	0	0	0	0	0	0	0	0	0	0	0	0
vit	chr17_78622795_78622824	88.7818	86.6852	130.607	264.571	56.0282	0	0	0	0	0	0	0	0	0	0	0	0	0	0	0	133.277	0	0	29.8941	0	0	0	0.256576	0	0	0	0	0	0	0	0	0	0	0	0	0	0	75.3397	113.323	0	0
syce1	chr7_140780898_140780927	133.173	138.594	133.956	116.42	596.652	0	50.9907	0	68.704	0	0	0	0	0	0	0	0	0	0	0	240.362	0	0	29.8941	0	0	52.1114	0.256576	0	0	0	0	0	0	0	0	0	0	0	0	0	0	0	37.7742	99.1249	47.9021
myzap	chr9_71552249_71552278	88.7818	60.3472	200.54	28.7627	180.666	0	0	0	0	0	0	0	0	0	0	0	0	0	1.17699	0	271.653	117.228	0	29.8941	0	0	0	0	0	0	0	0	0	0	0	0	0	0	0	0	0	0	75.3397	0	49.5625	0
pck1	chr2_173157028_173157057	88.7818	226.046	214.133	133.313	488.527	0	0	0	0	0	0	0	0	0	0	0	0	0	0	0	274.898	0	0	29.8941	26.9614	0	0	0.256576	0	0	0	0	0	0	0	0	0	0	0	0	0	0	0	0	99.1249	95.8043
klf15	chr6_90466721_90466750	44.3909	81.8267	87.8594	68.4826	40.8908	18.6545	0	0	0	0	0	0	0	0	0	0	0	0	0	0	64.2046	0	0	0	0	0	52.1114	0	0	0	0	0	0	0	0	0	0	0	0	0	0	0	75.3397	0	0	0
ptprb	chr10_116319552_116319581	310.736	246.247	133.365	145.868	171.82	9.32726	0	0	0	0	0	0	0	0	0	0	0	0	0	0	261.222	117.228	109.843	29.8941	468.239	0	104.223	27.197	0	0	0	0	0	0	0	0	0	0	0	0	0	0	301.359	0	99.1249	23.9511
kdm5c	chrX_152267162_152267191	44.3909	104.84	141.245	497.64	26.9329	0	0	0	0	0	0	0	0	0	0	0	0	0	0	0	159.7	0	0	0	0	0	52.1114	0	0	0	0	0	0	0	0	0	0	0	0	0	0	0	150.679	0	99.1249	23.9511
adra1a	chr14_66637868_66637897	1376.12	264.403	188.129	5235.04	47.5749	0	0	0	0	0	0	0	0	0	0	0	0	0	0	0	174.998	1523.96	1537.81	747.352	4.94705	10635.9	938.005	3.33548	0	0	0	0	0	0	0	0	0	0	0	0	0	0	602.717	226.645	842.562	479.021
zbtb16	chr9_48832067_48832096	133.173	304.293	304.75	312.966	205.437	0	0	0	68.704	0	0	0	0	0	0	0	0	0	0	0	237.812	0	0	0	0	0.257055	0	0.513151	0	0	0	0	0	0	0	0	0	0	0	0	0	0	226.019	37.7742	99.1249	23.9511
osr1	chr12_9579388_9579417	44.3909	129.133	136.32	45.4268	33.2238	0	0	0	0	0	0	0	0	0	0	0	0	0	0.588496	0	199.104	0	0	0	0	0	0	0	0	0	0	0	0	0	0	0	0	0	0	0	0	0	0	0	0	0
tshz2	chr2_169884910_169884939	177.564	180.019	166.854	57.0689	95.5429	0	0	0	0	0	0	0	0	0	0	0	0	0	0	0	276.752	117.228	0	0	0	0	0	0.256576	0	0	0	0	0	0	0	0	0	0	0	0	0	0	150.679	0	99.1249	0
pfkfb1	chrX_150611061_150611090	44.3909	244.713	179.659	95.6474	260.875	0	0	0	343.52	0	0	0	0	0	0	0	0	0	0	0	219.964	0	109.843	0	0	0	52.1114	0	0	0	0	0	0	0	0	0	0	0	0	0	0	0	0	0	49.5625	23.9511
nwd2	chr5_63804673_63804702	133.173	202.521	241.909	100.213	148.819	0	0	0	68.704	0	0	0	0	0	0	0	0	0	0	0	179.634	234.456	219.687	89.6822	73.2164	185.336	0	1159.98	0	0	0	0	0	0	0	0	0	0	0	0	0	0	0	37.7742	148.687	0
ak5	chr3_152615879_152615908	399.518	148.567	134.547	136.052	90.4315	0	0	0	0	0	0	0	0	0	0	0	0	0	0	0	219.269	703.367	439.373	179.364	215.692	3533.73	416.891	0.769727	0	0	0	0	0	0	0	0	0	0	0	0	0	0	0	0	49.5625	0
wif1	chr10_121084963_121084992	44.3909	106.63	113.666	56.6123	388.462	0	0	0	0	0	0	0	0	0	0	0	0	0	0	0	158.31	0	109.843	0	0	0	0	0	0	0	0	0	0	0	0	0	0	0	0	0	0	0	75.3397	75.5484	0	47.9021
ropn1	chr16_34666710_34666739	133.173	414.248	369.955	329.401	490.493	9.32726	0	0	0	0	0	0	0	0	0	0	0	0.481508	0	0	560.457	0	0	119.576	62.8276	0.257055	208.446	0.256576	0	0	0	72.9928	0	0	0	0	0	0	0	0	0	0	301.359	113.323	148.687	71.8532
olfm4	chr14_80011969_80011998	88.7818	84.1281	139.078	149.52	155.7	0	0	0	68.704	0	0	0	0	0	0	0	0	0	0.588496	0	205.362	0	0	0	0.247353	0	0	0	0	0	0	0	0	0	0	0	0	0	0	0	0	0	75.3397	37.7742	0	0
dido1	chr2_180673229_180673258	44.3909	89.498	124.697	287.627	26.5397	0	0	0	68.704	0	0	0	0	0	0	0	0	0	0	0	85.0653	0	0	0	0	0	0	0	0	0	0	0	0	0	0	0	0	0	0	0	0	0	150.679	75.5484	0	47.9021
esr1	chr10_4746714_4746743	44.3909	205.845	171.188	116.192	353.666	9.32726	0	0	0	0	0	0	0	0	0	0	0	0	0	0	249.865	0	0	89.6822	39.3291	0	0	0	0	0	0	0	0	0	0	0	0	0	0	0	0	0	226.019	37.7742	198.25	23.9511
smyd1	chr6_71238734_71238763	44.3909	315.544	322.676	96.3322	404.19	0	0	0	0	0	0	0	0	0	0	0	0	0.481508	0.588496	0	390.095	0	109.843	0	0.742058	0	0	0.256576	0	0	0	0	0	0	0	0	0	0	0	0	0	0	376.698	37.7742	0	47.9021
slc7a14	chr3_31257798_31257827	44.3909	154.192	128.834	365.469	109.894	0	0	0	68.704	0	0	0	0	0	0	0	0	0.481508	0	0	140.23	0	0	0	0.247353	0.257055	52.1114	0	0	0	0	0	0	0	0	0	0	0	0	0	0	0	376.698	0	0	0
cldn11	chr3_31150302_31150331	44.3909	276.165	317.357	182.164	139.186	0	50.9907	0	0	0	0	0	0	0	0	0	0	0	0	0	274.666	0	0	0	0.247353	0	208.446	0	0	0	0	0	0	0	0	0	0	0	0	0	0	0	75.3397	0	0	0
ptpn13	chr5_103501383_103501412	44.3909	161.608	207.041	179.653	212.907	18.6545	0	0	68.704	0	0	0	0	0	0	0	0	0	2.35398	0	292.513	117.228	109.843	0	0.247353	0	104.223	0.256576	0	0	0	0	0	0	0	0	0	0	0	0	0	0	75.3397	0	0	95.8043
plac9a	chr14_25902811_25902840	44.3909	417.828	370.546	264.8	146.067	9.32726	0	0	0	0	0	0	0	0	0	0	0	0.963017	1.17699	0	318.705	0	0	0	0	0	52.1114	0	0	0	0	0	0	0	0	0	0	0	0	0	0	0	75.3397	0	0	71.8532
cntfr	chr4_41663633_41663662	44.3909	422.43	396.352	524.577	494.621	0	0	0	0	0	0	0	0	0	0	0	0	0	1.17699	0	309.665	351.683	109.843	29.8941	46.2549	0.257055	0	0	0	0	0	0	0	0	0	0	0	0	0	0	0	0	226.019	151.097	148.687	71.8532
fabp4	chr3_10206030_10206059	44.3909	248.293	190.296	296.986	311.989	0	50.9907	0	0	0	0	0	0	0	0	0	0	0.963017	0	0	208.607	0	0	29.8941	0.247353	0	0	171.649	0	0	0	0	0	0	0	0	0	0	0	0	0	0	75.3397	0	148.687	23.9511
ncor2	chr5_125033438_125033467	88.7818	187.434	161.929	6.84826	44.626	18.6545	0	0	0	0	0	0	0	0	0	0	0	0	0	0	230.858	0	0	0	0.247353	0.257055	0	0	0	0	0	0	0	0	0	0	0	0	0	0	0	0	0	37.7742	0	0
acadl	chr1_66857449_66857478	88.7818	285.371	333.511	176.229	391.018	0	50.9907	0	137.408	0	0	0	0	0	0	0	0	0	0	0	294.599	0	0	0	0	0	156.334	0	0	0	0	0	0	0	0	0	0	0	0	0	0	0	75.3397	113.323	148.687	23.9511
car6	chr4_150196047_150196076	177.564	130.667	39.2018	31.9586	87.2861	0	0	0	0	0	0	0	0	0	0	0	0	0	0	0	28.046	351.683	0	59.7881	1.73147	0.771164	104.223	874.923	0	0	0	0	0	0	0	0	0	0	0	0	0	0	0	75.5484	49.5625	0
prrg3	chrX_71966539_71966568	44.3909	231.928	308.099	435.778	219.395	0	0	0	0	0	0	0	0	0	0	0	0	0	0	0	237.58	0	109.843	0	0	0.514109	52.1114	53.3677	0	0	0	0	0	0	0	0	0	0	0	0	0	0	0	113.323	49.5625	71.8532
pkd1l2	chr8_117057408_117057437	44.3909	139.361	126.47	83.5488	63.4987	0	0	0	0	0	0	0	0	0	0	0	0	0.481508	0	0	149.965	0	109.843	0	0	0.257055	0	0	0	0	0	0	0	0	0	0	0	0	0	0	0	0	75.3397	0	49.5625	47.9021
herc1	chr9_66372251_66372280	133.173	231.416	232.256	262.06	102.817	18.6545	0	0	206.112	0	0	0	0	0	0	0	0	0.963017	0	0	298.076	117.228	439.373	29.8941	0.494705	0.257055	3387.24	0.256576	0	0	0	0	0	0	0	0	0	0	0	0	0	0	0	0	99.1249	23.9511
aoc3	chr11_101331811_101331840	133.173	77.4797	131.789	84.9185	29.8817	0	0	0	0	0	0	0	0	0	0	0	0	0	0	0	98.5088	0	0	0	0.247353	0	0	0	0	0	0	0	0	0	0	0	0	0	0	0	0	0	75.3397	0	0	0
adamts7	chr9_90193552_90193581	44.3909	69.297	68.9479	10.5007	24.967	0	0	0	0	0	0	0	0	0	0	0	0	0	0	0	114.502	0	0	29.8941	0	0	0	0	0	0	0	0	0	0	0	0	0	0	0	0	0	0	0	0	0	0
lep	chr6_29069074_29069103	88.7818	38.612	61.6591	0.228275	22.4113	0	0	0	0	0	0	0	0	0	0	0	0	0.481508	0	0	46.3571	117.228	0	0	0	0.257055	0	0.256576	2019.87	0	0	0	0	0	0	0	0	0	0	0	0	0	150.679	0	0	23.9511
zfp142	chr1_74576521_74576550	88.7818	82.8495	161.929	207.959	72.935	0	0	0	0	0	0	0	0	0	0	0	0	0.481508	0	0	89.701	0	0	0	0	0	0	0	0	0	0	0	0	0	0	0	0	0	0	0	0	0	0	0	49.5625	23.9511
dact2	chr17_14196445_14196474	88.7818	164.165	142.23	88.7991	241.216	9.32726	0	0	68.704	0	0	0	0	0	0	0	0	0	0.588496	0	143.475	0	0	59.7881	0	0	0	0	0	0	0	0	0	0	0	0	0	0	0	0	0	0	0	37.7742	0	0
neb	chr2_52225593_52225622	44.3909	264.914	253.137	170.293	136.63	0	0	0	68.704	0	0	0	0	0	0	0	0	1.44453	0.588496	0	277.215	0	109.843	89.6822	37.5976	0.257055	0	0	0	0	0	0	0	0	0	0	0	0	0	0	0	0	150.679	0	99.1249	23.9511
ccl21b	chr4_41903722_41903751	44.3909	125.809	176.507	44.742	57.601	0	0	0	0	0	0	0	0	0	0	0	0	0	0	0	155.065	0	0	0	0	0	0	0	0	0	0	0	0	0	0	0	0	0	0	0	0	0	0	0	148.687	47.9021
kcne1	chr16_92348916_92348945	88.7818	359.015	281.702	139.705	202.291	0	0	0	0	0	0	0	0	0	0	0	0	0.481508	0.588496	0	260.527	234.456	219.687	29.8941	0	647.006	156.334	0.256576	0	0	0	0	0	0	0	0	0	0	0	0	0	0	226.019	37.7742	198.25	0
drd2	chr9_49395874_49395903	88.7818	168	123.712	133.541	124.048	0	0	0	0	0	0	0	0	0	0	0	0	0	0	0	212.547	0	0	29.8941	0.247353	0	0	0	0	0	0	0	0	0	0	0	0	0	0	0	0	0	150.679	0	49.5625	47.9021
alb	chr5_90474579_90474608	44.3909	156.749	134.153	70.9937	144.101	0	0	0	0	0	0	0	0	0	0	0	0	0	0	0	245.229	0	109.843	0	253.042	0.257055	104.223	0.256576	0	0	0	0	0	0	0	0	0	0	0	0	0	0	0	0	0	71.8532
notch1	chr2_26476373_26476402	88.7818	210.704	245.455	316.846	382.565	0	0	0	0	0	0	0	0	0	0	0	0	0	0	0	196.322	234.456	0	89.6822	977.043	1.02822	52.1114	135.215	0	0	0	0	0	0	0	0	0	0	0	0	0	0	0	151.097	49.5625	23.9511
ky	chr9_102542147_102542176	88.7818	268.238	274.807	138.791	348.161	0	0	0	68.704	0	0	0	0	0	0	0	0	0	0	0	276.288	0	0	0	0	0	0	0.256576	0	0	0	0	0	0	0	0	0	0	0	0	0	0	0	37.7742	0	71.8532
ncor2	chr5_125067839_125067868	44.3909	296.11	374.683	92.2233	76.277	0	0	0	137.408	0	0	0	0	0	0	0	0	0	0	0	234.103	234.456	109.843	0	0	131.355	52.1114	0	0	0	0	0	0	0	0	0	0	0	0	0	0	0	0	37.7742	99.1249	23.9511
syn2	chr6_115239494_115239523	355.127	209.17	204.874	227.134	129.553	0	0	0	0	0	0	0	0	0	0	0	0	0	0	0	288.341	586.139	659.06	388.623	2.22617	5152.4	521.114	2.05261	0	0	0	0	0	0	0	0	0	0	0	0	0	0	226.019	37.7742	49.5625	30106.5
ropn1	chr16_34671230_34671259	133.173	441.864	422.552	456.551	266.38	0	0	0	206.112	0	0	0	0	0	0	0	0	0	0.588496	0	324.036	0	0	59.7881	0.247353	0	52.1114	0.256576	0	0	0	0	0	0	0	0	0	0	0	0	0	0	376.698	37.7742	148.687	71.8532
krt14	chr11_100207318_100207347	1020.99	416.805	325.04	296.302	437.02	0	0	0	206.112	0	0	0	0	0	0	0	0	0.481508	0.588496	0	194.468	2110.1	878.747	597.881	9720.47	2.31349	938.005	3.07891	0	0	1.12005	0	0	0	0	0	0	0	0	0	0	0	0	113.323	49.5625	47.9021
scgb3a1	chr11_49664475_49664504	44.3909	104.585	136.123	302.922	114.022	0	0	0	0	0	0	0	0	0	0	0	0	0	0	0	134.436	0	0	29.8941	0	86.6274	0	0	0	0	0	0	0	0	0	0	0	0	0	0	0	0	150.679	37.7742	0	0
mme	chr3_63300217_63300246	399.518	49.6074	122.924	61.4061	27.9158	0	0	0	68.704	0	0	0	0	0	0	0	0	0	0	0	89.4692	1055.05	1098.43	478.305	8.9047	8.22574	312.668	6807.98	0	0	0	0	0	0	0	0	0	0	0	0	0	0	150.679	0	0	0
gpc3	chrX_52428859_52428888	133.173	290.741	271.852	240.374	169.264	0	50.9907	0	137.408	0	0	0	0	0	0	0	0	0.481508	0	0	413.505	117.228	0	29.8941	0	0.257055	52.1114	0	0	0	0	0	0	0	0	0	0	0	0	0	0	0	150.679	37.7742	49.5625	143.706
ush2a	chr1_188263184_188263213	133.173	299.69	249.395	274.615	174.965	0	0	0	0	0	0	0	0	0	0	0	0	0	0	0	510.624	234.456	0	29.8941	0.247353	0.257055	0	0.256576	0	0	0	0	0	0	0	0	0	0	0	0	0	0	75.3397	37.7742	0	71.8532
n4bp2	chr5_65806995_65807024	621.473	146.265	179.068	58.2102	213.104	0	0	0	0	0	0	0	0	0	0	0	0	0	0	0	166.19	234.456	0	89.6822	1294.64	121.33	312.668	0.513151	0	0	0	0	0	0	0	0	0	0	0	0	0	0	0	37.7742	99.1249	23.9511
sis	chr3_72946569_72946598	44.3909	88.9865	78.0097	45.4268	21.0352	0	50.9907	0	0	0	0	0	0	0	0	0	0	0	0	0	60.0325	0	0	0	0	0	0	0	0	0	0	0	0	0	0	0	0	0	0	0	0	0	0	0	49.5625	0
kcnh8	chr17_52898520_52898549	88.7818	186.156	150.7	126.236	441.738	0	0	0	0	0	0	0	0	0	0	0	0	0	0	0	206.057	0	109.843	0	0	0	104.223	0.256576	0	0	0	0	0	0	0	0	0	0	0	0	0	0	75.3397	37.7742	99.1249	0
lep	chr6_29070824_29070853	88.7818	96.6578	207.632	6.61999	99.0815	0	0	0	68.704	0	0	0	0	0	0	0	0	0	0	0	151.356	117.228	0	0	0	0	0	0	0	0	0	0	0	0	0	0	0	0	0	0	0	0	150.679	0	0	47.9021
kmt2c	chr5_25404301_25404330	44.3909	60.8586	89.4353	52.2751	39.5147	9.32726	0	0	0	0	0	0	0	0	0	0	0	0	0	0	86.6878	0	0	0	0.247353	0	0	0	0	0	0	0	0	0	0	0	0	0	0	0	0	0	0	0	0	23.9511
prrc2b	chr2_32208773_32208802	88.7818	179.507	185.568	59.8082	128.177	0	0	0	0	0	0	0	0	0	0	0	0	0	0.588496	0	213.243	0	0	0	0.247353	0	0	0	0	0	0	0	0	0	0	0	0	0	0	0	0	0	150.679	0	148.687	0
pcdh9	chr14_93888493_93888522	44.3909	190.247	186.159	197.002	70.5759	0	0	0	0	0	0	0	0	0	0	0	0	0	0	0	188.21	117.228	0	0	0	66.063	0	0	0	0	0	0	0	0	0	0	0	0	0	0	0	0	150.679	0	49.5625	23.9511
myzap	chr9_71564504_71564533	44.3909	128.877	216.693	110.942	108.518	0	0	0	0	0	0	0	0	0	0	0	0	0	0	0	186.124	0	109.843	0	0	203.33	104.223	0	0	0	0	0	0	0	0	0	0	0	0	0	0	0	75.3397	0	49.5625	23.9511
btnl9	chr11_49169319_49169348	88.7818	255.197	234.029	161.619	31.2579	9.32726	0	0	206.112	0	0	0	0	0	0	0	0	0.481508	0.588496	0	170.362	117.228	109.843	0	0	0	52.1114	0	0	0	0	0	0	0	0	0	0	0	0	0	0	0	75.3397	37.7742	99.1249	47.9021
krt14	chr11_100204717_100204746	88.7818	203.544	315.585	227.362	106.552	9.32726	0	0	68.704	0	0	0	0	0	0	0	0	0.481508	0	0	225.296	0	0	59.7881	42.5447	286.359	52.1114	0.256576	0	0	0	0	0	0	0	0	0	0	0	0	0	0	75.3397	0	148.687	95.8043
ttyh1	chr7_4131334_4131363	44.3909	25.0594	97.9061	24.882	40.301	0	0	0	0	0	0	0	0	0	0	0	0	0	0	0	83.211	0	109.843	0	0	0	52.1114	0	0	0	0	0	0	0	0	0	0	0	0	0	0	0	75.3397	0	0	0
pclo	chr5_14522303_14522332	88.7818	169.023	188.917	159.793	98.4917	0	0	0	0	0	0	0	0	0	0	0	0	0	0	0	197.713	0	0	29.8941	0.494705	0.771164	104.223	0.256576	0	0	0	0	0	0	0	0	0	0	0	0	0	0	0	37.7742	0	0
mybpc1	chr10_88573408_88573437	88.7818	260.567	156.019	375.513	212.907	9.32726	0	0	206.112	0	0	0	0	0	0	0	0	0.481508	0	0	194.7	234.456	0	0	0	0	52.1114	0	0	0	0	0	0	0	0	0	0	0	0	0	0	0	75.3397	0	99.1249	95.8043
slco1a6	chr6_142109324_142109353	88.7818	172.348	166.657	331.456	265.2	0	0	0	0	0	0	0	0	0	0	0	0	0	0	0	194.468	0	0	29.8941	0.494705	0	104.223	0.513151	0	0	0	0	0	0	0	0	0	0	0	0	0	0	75.3397	0	49.5625	71.8532
mfap4	chr11_61486128_61486157	177.564	421.408	370.94	339.902	460.218	0	50.9907	0	0	0	0	27.962	0	12.5026	12658.1	46.0895	72.9928	0	0	0	607.973	117.228	0	29.8941	444.74	0.514109	156.334	0.513151	0	0	0	0	0	0	0	0	0	0	0	0	0	0	75.3397	0	198.25	0
ank1	chr8_23109295_23109324	133.173	152.914	123.318	275.757	8.45338	0	0	0	0	0	0	0	0	0	0	0	0	0	0	0	264.467	0	0	149.47	0.247353	0	52.1114	0	0	0	0	0	0	0	0	0	0	0	0	0	0	0	75.3397	0	49.5625	23.9511
fat4	chr3_38949656_38949685	88.7818	120.694	109.529	154.999	199.146	9.32726	0	0	0	0	0	0	0	0	0	0	0	0	0	0	142.78	0	0	29.8941	0	0	0	0	0	0	0	0	0	0	0	0	0	0	0	0	0	0	75.3397	0	0	47.9021
hspb6	chr7_30553498_30553527	177.564	386.887	258.259	391.492	75.4907	0	0	0	0	0	0	0	0	0	0	0	0	0.481508	0	0	638.801	234.456	109.843	89.6822	0	0.257055	104.223	0.513151	0	0	0	0	0	0	0	0	0	0	0	0	0	0	75.3397	75.5484	49.5625	119.755
fabp7	chr10_57785553_57785582	88.7818	140.895	157.201	79.8964	202.488	9.32726	0	0	68.704	0	0	0	0	0	0	0	0	0	0	0	228.541	0	0	0	0	0	0	0	0	0	0	0	0	0	0	0	0	0	0	0	0	0	75.3397	37.7742	49.5625	0
ngfr	chr11_95578231_95578260	88.7818	287.928	355.968	249.277	202.291	0	0	5696.79	0	0	0	0	0	0	12.9893	0	0	0.481508	0	0	411.188	586.139	219.687	15754.2	2.47353	2.05644	11464.5	9.4933	9426.08	0	0	0	0	0	0	0	53.0063	0	0	0	0	0	75.3397	75.5484	99.1249	23.9511
csf3	chr11_98701550_98701579	443.909	270.795	221.815	125.551	14.9409	0	0	0	68.704	0	0	0	0	0	0	0	0	0.481508	0	0	309.434	586.139	549.217	239.153	2264.51	0	416.891	1220.27	0	0	0	0	0	0	0	0	0	0	0	0	0	0	0	0	49.5625	23.9511
runx1	chr16_92696809_92696838	133.173	193.316	231.862	235.58	439.183	0	0	0	0	0	0	0	0	0	0	0	0	0	0	0	485.359	0	219.687	29.8941	0	0	52.1114	0.256576	0	0	0	0	0	0	0	0	0	0	0	0	0	0	75.3397	75.5484	297.375	47.9021
mme	chr3_63343484_63343513	1109.77	188.201	176.901	77.8419	4.52158	0	10555.1	0	0	0	0	0	0	0	0	0	0	0.481508	0	0	294.831	820.594	1647.65	538.093	17.0673	7.45458	1667.57	10641.7	0	0	0	0	0	0	0	0	0	0	0	0	0	0	0	0	99.1249	0
clca4b	chr3_144925208_144925237	44.3909	144.475	244.47	78.9833	392.787	0	0	0	137.408	0	0	0	0	0	0	0	0	0	0	0	270.03	117.228	0	29.8941	0.247353	0	0	0.256576	0	0	0	0	0	0	0	0	0	0	0	0	0	0	75.3397	0	49.5625	23.9511
efcab1	chr16_14917673_14917702	88.7818	272.841	124.303	342.641	105.569	9.32726	0	0	68.704	0	0	0	0	0	0	0	0	0	0	0	186.356	0	0	0	0	0	52.1114	0	0	0	0	0	0	0	0	0	0	0	0	0	0	0	75.3397	75.5484	198.25	23.9511
irs4	chrX_141723133_141723162	44.3909	161.096	101.846	93.1364	292.33	0	0	0	0	0	0	0	0	0	0	0	0	0	0	0	116.588	0	0	0	0	0	0	0	0	0	0	0	0	0	0	0	0	0	0	0	0	0	0	0	0	0
ntrk3	chr7_78461673_78461702	44.3909	276.932	173.158	160.021	193.641	0	0	0	0	0	0	0	0	0	0	0	0	0.481508	0	0	344.897	0	329.53	29.8941	0.247353	0	52.1114	0	0	0	0	0	0	0	0	0	0	0	0	0	0	0	75.3397	0	49.5625	23.9511
des	chr1_75360864_75360893	443.909	283.069	187.144	298.356	413.429	9.32726	0	0	0	0	0	0	0	0	0	0	0	0	0.588496	0	205.362	1289.51	659.06	567.987	6491.52	2.05644	677.448	2.56576	0	0	0	0	0	0	0	0	0	0	0	0	0	0	75.3397	75.5484	99.1249	47.9021
scara5	chr14_65744654_65744683	133.173	150.357	239.348	31.9586	233.942	0	0	0	0	0	0	0	0	0	0	0	0	0	0	0	237.58	0	109.843	59.7881	0.247353	651.89	156.334	0.256576	0	0	0	0	0	0	0	0	0	0	0	0	0	0	0	0	0	23.9511
myh1	chr11_67202477_67202506	44.3909	169.79	309.478	341.957	92.9872	0	0	0	0	0	0	0	0	0	0	0	0	0	0	0	279.302	117.228	0	59.7881	0.247353	0.771164	104.223	0	0	0	0	0	0	0	0	0	0	0	0	0	0	0	301.359	37.7742	148.687	47.9021
slc6a2	chr8_92961470_92961499	355.127	224.256	246.046	235.124	117.758	0	0	0	68.704	0	0	0	0	0	0	0	0	0	0.588496	0	327.745	1055.05	659.06	149.47	4659.88	1.02822	416.891	1.79603	0	0	0	0	0	0	0	0	0	0	0	0	0	0	0	75.5484	0	47.9021
hepacam	chr9_37381549_37381578	44.3909	293.042	265.548	72.5916	75.8839	9.32726	0	0	137.408	0	0	0	0	0	0	0	0	0	0	0	329.135	234.456	109.843	59.7881	0.494705	0.257055	52.1114	0	0	0	0	0	0	0	0	0	0	0	0	0	0	0	75.3397	37.7742	0	23.9511
dlk2	chr17_46301685_46301714	133.173	247.526	292.339	349.718	448.816	0	50.9907	0	412.224	0	0	0	0	0	0	0	0	0	0.588496	0	455.922	0	109.843	0	25.7247	0.257055	6357.59	0.513151	0	0	0	0	0	0	0	0	0	0	0	0	0	0	226.019	188.871	49.5625	71.8532
aadac	chr3_60035967_60035996	44.3909	213.261	174.734	219.373	215.856	0	0	0	0	0	0	0	0	0	0	0	0	0	0	0	162.482	0	0	0	0	0	0	0	0	0	0	0	0	0	0	0	0	0	0	0	0	0	0	37.7742	49.5625	47.9021
ntrk3	chr7_78302572_78302601	88.7818	95.1235	76.2367	155.912	48.951	0	0	0	0	0	0	0	0	0	0	0	0	0	0.588496	0	123.773	117.228	0	0	0	0	0	0	0	0	0	0	0	0	0	0	0	0	0	0	0	0	75.3397	75.5484	49.5625	0
arid1b	chr17_5290966_5290995	44.3909	68.0185	85.6924	32.8717	118.347	0	0	0	0	0	0	0	0	0	0	0	0	0.481508	0	0	58.41	0	0	0	0	0	0	0	0	0	0	0	0	0	0	0	0	0	0	0	0	0	150.679	75.5484	49.5625	0
adh1	chr3_138282618_138282647	177.564	673.28	565.767	866.762	533.743	0	0	0	68.704	0	0	0	0	0	0	0	0	0	1.17699	0	510.624	0	0	0	9.3994	0	52.1114	0.769727	0	0	0	0	0	0	17023.8	0	17.6688	0	0	5.45933	0	0.506881	301.359	188.871	247.812	191.609
plac9b	chr14_25888944_25888973	133.173	188.201	182.614	210.242	198.753	0	0	0	0	0	0	0	0	0	0	0	0	0	0	0	250.56	0	0	0	0	0.257055	0	0	0	0	0	0	0	0	0	0	0	0	0	0	0	0	0	0	49.5625	71.8532
gpx3	chr11_54907128_54907157	44.3909	218.119	115.833	155.912	80.0123	0	0	0	0	0	0	0	0	0	0	0	0	0.481508	0	0	182.879	0	109.843	29.8941	0	0	0	0	0	0	0	0	0	0	0	0	0	0	0	0	0	0	0	0	49.5625	23.9511
lrrc3b	chr14_15358458_15358487	44.3909	235.763	257.471	131.943	38.1385	0	50.9907	0	0	0	0	0	0	0	0	0	0	0	0	0	105.231	234.456	0	0	0	0	0	0	0	0	0	0	0	0	0	0	0	0	0	0	0	0	0	37.7742	0	23.9511
pcdh9	chr14_93887271_93887300	44.3909	104.073	118.393	70.3088	0.19659	0	0	0	137.408	0	0	0	0	0	0	0	0	0	0.588496	0	113.807	820.594	0	29.8941	35.8661	0.257055	2449.24	0	480.922	0	0	0	0	0	0	0	0	0	0	0	0	0	75.3397	0	49.5625	0
bcorl1	chrX_48367891_48367920	44.3909	283.836	186.159	289.453	173.393	9.32726	50.9907	0	0	0	0	0	0	0	0	0	0	0	0.588496	0	168.508	117.228	0	0	0	0	52.1114	0	0	0	0	50584	0	0	0	0	0	0	0	0	0	0	0	0	198.25	23.9511
klf15	chr6_90467220_90467249	88.7818	141.407	176.113	68.2544	176.931	0	50.9907	0	0	0	0	0	0	0	0	0	0	0	0	0	177.548	117.228	0	0	0	0	52.1114	0	0	0	0	0	0	0	0	0	0	0	0	0	0	0	75.3397	75.5484	0	47.9021
npy2r	chr3_82541371_82541400	44.3909	120.95	201.919	165.956	124.048	0	0	0	0	0	0	0	0	0	0	0	0	0	0	0	296.222	117.228	109.843	59.7881	0	85.8562	52.1114	0	0	0	0	0	0	0	0	0	0	0	0	0	0	0	0	37.7742	49.5625	23.9511
bcorl1	chrX_48389237_48389266	44.3909	56.5116	32.504	15.751	33.6169	0	0	0	0	0	0	0	0	0	0	0	0	0	0	0	24.3375	0	0	29.8941	3.46294	0	0	0	0	37.6935	0	0	0	0	0	0	0	0	0	0	0	0	0	0	0	0
adra1a	chr14_66638183_66638212	177.564	293.553	273.822	311.139	100.654	0	0	0	0	0	0	0	0	0	0	0	0	0	0	0	455.227	0	109.843	29.8941	0.247353	0	52.1114	0	0	0	0	0	0	0	0	0	0	0	0	0	0	0	0	37.7742	99.1249	47.9021
nts	chr10_102485038_102485067	88.7818	113.023	126.864	84.6902	170.64	0	0	0	0	0	0	19349.7	4.10373	25.0051	12.9893	46.0895	0	0	0	0	110.562	117.228	0	0	0.247353	0.257055	0	0	0	0	0	291.971	0	17.2436	0	5.18838	0	0	109.502	0	0	0	0	0	247.812	47.9021
scap	chr9_110374111_110374140	88.7818	109.443	228.513	14.3814	3.14545	0	0	0	0	0	0	0	0	0	0	0	0	0	0	0	192.382	117.228	0	29.8941	0	0	0	0	0	0	2700.44	0	0	0	0	0	0	0	0	0	0	0	75.3397	0	0	0
adh1	chr3_138286887_138286916	88.7818	554.376	658.157	316.618	641.867	0	0	0	68.704	0	0	0	0	0	0	0	0	0	0	0	671.946	0	109.843	119.576	0	0.257055	52.1114	0	0	0	0	0	0	0	0	0	0	0	0	0	0	0	226.019	151.097	99.1249	119.755
krt14	chr11_100204935_100204964	133.173	398.905	389.654	278.724	127.587	0	0	0	137.408	0	0	0	0	0	0	0	0	0	0	0	585.722	0	109.843	29.8941	0.247353	0	104.223	0	0	0	0	0	0	0	0	0	0	0	0	0	0	0	0	113.323	99.1249	71.8532
bmx	chrX_164240999_164241028	88.7818	128.877	99.285	90.8536	184.009	0	0	0	0	0	0	0	0	0	0	0	0	0	0	0	174.303	0	109.843	0	0	0	0	0	0	0	0	0	0	0	0	0	0	0	0	0	0	0	0	0	0	23.9511
rb1	chr14_73265538_73265567	88.7818	319.124	169.021	262.288	461.791	0	50.9907	0	137.408	0	0	0	0	0	0	0	0	1.44453	0.588496	0	128.177	351.683	0	89.6822	0.742058	0.257055	208.446	706.353	0	0	0	0	0	0	0	0	0	0	0	0	0	0	0	75.5484	49.5625	23.9511
dmd	chrX_83922531_83922560	88.7818	368.476	253.137	352.914	261.465	0	50.9907	0	0	0	0	0	0	0	0	0	0	0	0	0	155.992	0	0	29.8941	3.46294	0	104.223	0	0	0	0	0	0	0	0	0	0	0	0	0	0	0	226.019	113.323	0	71.8532
kdm5c	chrX_152262188_152262217	621.473	252.129	111.105	474.585	141.545	0	101.981	0	68.704	0	0	0	0	0	0	0	0	0	0.588496	0	172.912	468.911	549.217	89.6822	43.0394	2988	364.78	0.513151	0	0	0	0	0	0	0	0	0	0	0	0	0	0	301.359	75.5484	0	23.9511
pdk4	chr6_5491599_5491628	133.173	148.567	115.833	76.7005	121.886	0	0	0	68.704	0	0	0	0	0	0	0	0	0	0	0	138.144	117.228	0	59.7881	28.4456	0	0	0	0	0	0	0	0	0	0	0	0	0	0	0	0	0	0	0	0	23.9511
bcorl1	chrX_48379292_48379321	44.3909	43.9819	75.6457	0	24.1806	0	0	0	0	0	0	0	0	0	0	0	0	0	0	0	95.7274	0	0	59.7881	0	0	0	0	0	0	0	0	0	0	0	0	0	0	0	0	0	0	0	0	0	0
ptchd3	chr11_121830416_121830445	221.955	257.754	337.845	120.073	310.023	0	0	0	0	0	0	0	0	0	0	0	0	0	0	0	442.247	586.139	439.373	298.941	1684.97	0.514109	208.446	1.28288	0	0	0	0	0	0	0	0	0	0	0	0	0	0	0	113.323	49.5625	0
neurog2	chr3_127634103_127634132	44.3909	210.192	187.932	137.878	377.453	0	0	0	0	0	0	0	0	0	0	0	0	0	0.588496	0	216.256	0	0	29.8941	0.742058	0	0	0	0	0	0	0	0	0	0	0	0	0	0	0	0	0	75.3397	0	49.5625	0
nf1	chr11_79418656_79418685	44.3909	105.096	109.923	57.5254	1633.67	2592.98	263622	413611	893.152	367794	207011	131995	274441	224359	268691	201595	206278	1176.32	2.94248	24859.9	125.628	2344.56	109.843	269.047	63.817	548.297	6566.04	12.0591	159378	354621	370450	252993	13051.6	363979	300489	384075	288937	367541	33836.3	377600	324251	388777	904.076	906.581	3667.62	2874.13
avpr2	chrX_73893028_73893057	88.7818	244.713	285.247	179.881	183.026	9.32726	5405.01	0	206.112	0	0	0	0	0	0	0	0	0	0	0	385.691	0	0	59.7881	0.247353	0	0	0.513151	0	0	0	0	0	0	0	0	0	0	0	0	0	0	150.679	37.7742	0	47.9021
agmo	chr12_37405424_37405453	44.3909	262.868	98.891	307.259	188.727	0	0	0	0	0	0	0	0	0	0	0	0	0.481508	0	0	86.9196	0	0	0	0	0	0	24.6313	0	0	0	0	0	0	0	0	0	0	0	0	0	0	75.3397	37.7742	0	47.9021
kat6b	chr14_21668562_21668591	133.173	361.06	311.448	218.231	245.148	0	0	0	68.704	1.85715	0	27.962	0	6.25128	13106.2	0	72.9928	0.481508	0	0	564.861	351.683	109.843	508.199	0	0.257055	104.223	0	0	0	0	0	0	0	0	0	0	6.98655	0	0	0	0	301.359	113.323	49.5625	23.9511
adra1a	chr14_66638096_66638125	44.3909	156.238	123.712	173.718	188.137	0	0	0	68.704	0	0	0	0	0	0	0	0	0	0	0	69.0721	0	0	0	0	0	52.1114	0	0	0	0	0	0	0	0	0	0	0	0	0	0	0	0	0	0	0
dnah9	chr11_66094063_66094092	44.3909	583.015	527.944	629.584	380.402	18.6545	0	0	68.704	0	0	0	0	0	0	0	0	0.481508	0.588496	113.674	671.946	117.228	0	29.8941	0	0.257055	52.1114	0	0	0	0	0	0	0	0	0	0	0	0	0	0	0	75.3397	37.7742	148.687	23.9511
galnt15	chr14_32029638_32029667	88.7818	385.864	264.169	275.3	586.626	9.32726	0	0	0	0	0	0	0	0	0	0	0	0.481508	0	0	343.738	0	219.687	29.8941	0	0	0	36.6903	0	0	0	0	0	0	0	0	0	0	0	0	0	0	150.679	226.645	148.687	71.8532
pcdh9	chr14_93015539_93015568	44.3909	126.831	209.799	105.007	201.112	0	0	0	0	0	0	0	0	0	0	0	0	0	0	0	149.27	0	109.843	29.8941	528.098	0.514109	104.223	0.256576	432.83	0	0	0	0	0	0	0	0	0	0	0	0	43.5918	0	75.5484	49.5625	0
cav1	chr6_17308018_17308047	44.3909	84.8952	93.9662	139.933	65.0714	0	50.9907	0	0	0	0	0	0	0	0	0	0	0	0	0	143.012	117.228	109.843	0	0	0	52.1114	0	0	0	0	0	0	0	0	0	0	0	0	0	0	0	75.3397	0	0	47.9021
ovch2	chr7_107794366_107794395	44.3909	228.348	173.355	257.723	94.1668	9.32726	0	0	0	0	0	0	0	0	0	0	0	0	0	0	127.946	0	0	0	0	0	156.334	0	673.291	0	0	0	0	0	0	0	0	0	0	0	0	0	75.3397	37.7742	0	47.9021
myh9	chr15_77769807_77769836	88.7818	39.6348	363.454	49.9923	35.7794	9.32726	0	0	68.704	0	0	0	0	0	0	0	0	0	0.588496	0	142.316	0	0	89.6822	44.0288	0	0	0	0	0	0	0	0	0	0	0	0	0	0	0	0	0	75.3397	0	0	23.9511
ptprz1	chr6_22999811_22999840	44.3909	320.914	275.595	274.159	151.571	0	0	0	274.816	0	0	0	0	0	0	0	0	0	0	0	174.998	0	0	0	0.247353	0	0	0	0	0	0	0	0	0	0	0	0	0	0	0	0	0	150.679	37.7742	49.5625	71.8532
gabre	chrX_72263739_72263768	44.3909	111.745	245.455	182.392	0	0	0	0	137.408	0	0	0	0	0	0	0	0	0	0	0	179.634	117.228	0	0	6.18382	0	0	0	0	0	0	0	0	0	0	0	0	0	0	0	0	0	0	75.5484	99.1249	47.9021
krt5	chr15_101710557_101710586	133.173	247.781	142.427	218.688	77.26	0	0	0	68.704	0	0	0	0	0	0	0	0	0	0	0	212.316	117.228	109.843	59.7881	0	0	0	0	0	0	0	0	0	0	0	0	0	0	0	0	0	0	0	0	0	23.9511
dmd	chrX_83830503_83830532	44.3909	87.4523	115.833	59.1233	166.512	0	0	0	0	0	0	0	0	0	0	0	0	0	0	0	203.276	0	0	59.7881	0	0.257055	0	53.8809	0	0	0	0	0	0	0	0	0	0	0	0	0	0	150.679	113.323	0	23.9511
map3k1	chr13_111769270_111769299	443.909	200.475	185.765	173.946	129.946	0	0	0	0	0	0	0	0	0	0	0	0	0	0	0	235.726	937.822	549.217	388.623	5718.3	1.28527	521.114	2.56576	0	0	0	0	0	0	0	0	0	0	0	0	0	0	75.3397	0	99.1249	23.9511
ryr1	chr7_29096181_29096210	266.345	80.2925	96.5271	112.768	107.731	27.9818	3926.28	1286.92	0	0	0	0	0	6.25128	1915.93	0	0	2.40754	0.588496	0	146.257	2227.33	329.53	89.6822	2341.94	0.257055	260.557	1.0263	1587.04	0	810.917	72.9928	26289.2	34.4873	36.2209	1177.76	0	0	109.502	5.45933	0	0	150.679	113.323	49.5625	47.9021
dido1	chr2_180668028_180668057	44.3909	146.265	139.472	34.9261	175.555	0	0	0	0	0	0	0	0	0	0	0	0	0	0	0	286.023	0	0	29.8941	0.247353	0.257055	104.223	0.256576	480.922	0	0	0	0	0	0	0	0	0	0	0	0	0	75.3397	0	0	0
tmem213	chr6_38109424_38109453	44.3909	450.303	259.244	281.464	404.779	0	50.9907	0	68.704	0	0	0	0	0	0	0	0	0	0	0	342.347	117.228	109.843	89.6822	151.38	0	156.334	0.256576	0	0	0	0	0	0	0	0	0	0	0	0	0	0	75.3397	37.7742	198.25	23.9511
irs4	chrX_141723958_141723987	133.173	233.462	208.42	524.805	87.8759	0	0	0	206.112	0	0	0	0	0	0	0	0	0	0	0	410.492	117.228	109.843	59.7881	0.247353	101.794	208.446	0.256576	0	0	0	0	0	0	0	0	0	0	0	0	0	0	0	37.7742	49.5625	47.9021
tenm2	chr11_36221425_36221454	88.7818	109.188	179.068	124.41	113.236	0	0	0	0	0	0	0	0	0	0	0	0	0	0	0	213.706	0	0	59.7881	0.247353	0	0	0	0	0	0	0	0	0	0	0	0	0	0	0	0	0	75.3397	37.7742	49.5625	23.9511
pde3b	chr7_114416213_114416242	133.173	311.197	408.96	194.491	185.385	18.6545	0	0	0	0	0	0	0	0	0	0	0	0	0	0	516.882	117.228	109.843	89.6822	0.247353	0.514109	104.223	0.256576	0	0	0	0	0	0	0	0	0	0	0	0	0	0	150.679	0	148.687	23.9511
il17b	chr18_61692227_61692256	133.173	375.891	265.548	477.096	423.456	0	2192.6	116.681	206.112	0	79.0781	13.981	4.10373	0	0	29866	26204.4	0	0.588496	3.69071	381.751	1523.96	1098.43	8250.76	332.442	24.9343	7295.6	57.473	63722.2	75.387	2.2401	0	0	0	0	5.18838	229.694	0	109.502	0	5400.66	272.195	376.698	0	198.25	31807
sertm1	chr3_54899419_54899448	44.3909	112	104.407	9.13102	53.8657	0	0	0	0	0	0	0	0	0	0	0	0	0	0	0	131.422	0	0	0	38.8344	0	104.223	0	0	0	0	0	0	0	0	0	0	0	0	0	0	0	0	0	0	0
mrap	chr16_90738570_90738599	88.7818	158.284	262.987	149.064	165.922	0	0	0	0	0	0	0	0	0	0	0	0	0.963017	0.588496	0	210.693	234.456	0	0	466.507	0.257055	104.223	0.513151	0	0	0	0	0	0	0	0	0	0	0	0	0	0	75.3397	113.323	0	0
rhox13	chrX_38129752_38129781	44.3909	125.297	117.408	120.758	226.669	0	0	0	0	0	0	0	0	0	0	0	0	0	0	0	163.872	0	0	29.8941	0	0	0	0	0	0	0	0	0	0	0	0	0	0	0	0	0	0	0	0	0	23.9511
pde4dip	chr3_97757244_97757273	44.3909	92.055	75.8427	39.7199	42.0703	0	0	0	0	0	0	0	0	0	0	0	0	0	0.588496	0	52.1517	0	0	0	0	0	0	0	0	0	0	0	0	0	0	0	0	0	0	0	0	0	0	75.5484	0	0
pcolce2	chr9_95681593_95681622	44.3909	271.051	222.8	128.063	282.697	18.6545	50.9907	0	0	0	0	0	0	0	0	0	0	0	0	0	235.031	117.228	0	29.8941	0.247353	0	0	0	0	0	0	0	0	0	0	0	0	0	0	0	0	0	0	37.7742	49.5625	119.755
aldh3a1	chr11_61213456_61213485	44.3909	222.466	209.405	120.073	72.5418	9.32726	0	0	0	0	0	0	0	0	0	0	0	0.481508	0	0	199.104	0	0	0	42.792	0	52.1114	0	0	0	0	0	0	0	0	0	0	0	0	0	0	0	75.3397	37.7742	198.25	23.9511
dpt	chr1_164796762_164796791	177.564	282.558	355.377	265.256	420.507	0	0	0	274.816	0	0	0	0	0	0	0	0	0.963017	0	0	429.267	0	0	0	0.247353	0.257055	52.1114	0	0	0	2.2401	72.9928	0	0	0	0	0	0	0	0	0	0	376.698	113.323	49.5625	47.9021
hspb7	chr4_141422491_141422520	44.3909	496.842	567.737	342.413	613.362	0	101.981	0	137.408	0	0	0	0	0	0	0	0	0	0.588496	0	334.235	117.228	0	29.8941	6.92587	0	104.223	0	0	0	0	0	0	0	0	0	0	0	0	0	0	0	75.3397	75.5484	0	119.755
brca1	chr11_101524821_101524850	221.955	134.503	228.513	38.8068	24.3772	0	0	0	0	0	0	0	0	0	0	0	0	0	0	0	213.938	351.683	329.53	239.153	0.247353	1496.83	208.446	0.769727	0	0	0	0	0	0	0	0	0	0	0	0	0	0	0	0	0	0
lrrc3b	chr14_15357853_15357882	44.3909	63.9271	97.7091	68.9392	88.6622	0	0	0	0	0	0	0	0	0	0	0	0	0	0	0	123.31	0	0	0	0	0	52.1114	0.256576	0	0	0	0	0	0	0	0	0	0	0	0	0	0	75.3397	0	0	0
gdf10	chr14_33931929_33931958	44.3909	116.859	128.046	16.4358	178.701	0	0	0	0	0	0	0	0	0	0	0	0	0	0	0	108.244	0	109.843	29.8941	0	0	52.1114	0	0	0	0	0	0	0	0	0	0	0	0	0	0	0	75.3397	0	148.687	0
frem1	chr4_82950469_82950498	44.3909	195.617	164.687	126.921	25.9499	0	0	0	0	0	0	0	0	0	0	0	0	0.481508	1.17699	0	207.216	117.228	0	29.8941	0	0	52.1114	0.256576	0	0	0	0	0	0	0	0	0	0	0	0	0	0	0	0	148.687	23.9511
scn2b	chr9_45125500_45125529	133.173	284.092	261.411	356.795	172.41	9.32726	0	0	68.704	0	0	0	0	0	0	0	0	0	0	0	361.817	234.456	0	89.6822	0	0.257055	52.1114	0.256576	0	0	0	0	0	0	0	0	0	0	0	0	0	0	0	37.7742	0	47.9021
klhl29	chr12_5094907_5094936	44.3909	308.129	150.306	245.853	477.714	18.6545	0	0	0	0	0	0	0	0	0	0	0	0	0	0	141.853	117.228	0	29.8941	0	0	0	0	0	0	0	0	0	0	0	0	0	0	0	0	0	0	75.3397	75.5484	49.5625	0
cmtm5	chr14_54936758_54936787	177.564	231.672	233.832	153.173	353.076	0	0	0	0	0	0	0	0	0	0	0	0	0.481508	0	0	253.805	351.683	109.843	89.6822	1251.36	0	104.223	0.256576	0	0	0	0	0	0	0	0	0	0	0	0	0	0	75.3397	151.097	0	23.9511
hoxa6	chr6_52208325_52208354	44.3909	159.562	85.1014	14.1531	214.087	0	0	0	0	0	0	0	0	0	0	0	0	0	0.588496	0	94.3367	0	0	29.8941	0	0	0	0	0	0	0	0	0	0	0	0	0	0	0	0	0	0	75.3397	0	49.5625	47.9021
g0s2	chr1_193272653_193272682	44.3909	435.983	321.691	664.51	742.522	9.32726	101.981	0	0	0	0	0	0	0	0	0	0	0.963017	0	0	350.692	117.228	109.843	0	0	0	52.1114	0	0	0	0	0	0	0	0	0	0	0	0	0	0	0	226.019	151.097	99.1249	239.511
marco	chr1_120488183_120488212	133.173	242.412	201.328	220.514	228.635	0	50.9907	0	0	0	0	0	0	0	0	0	0	0	0	0	229.004	234.456	0	29.8941	29.435	0	0	82.3608	0	0	0	0	0	0	0	0	0	0	0	0	0	0	75.3397	113.323	49.5625	71.8532
sntg2	chr12_30226760_30226789	133.173	198.43	197.979	71.4502	243.575	9.32726	0	0	137.408	0	0	0	0	0	0	0	0	0.481508	0	0	199.104	1758.42	0	29.8941	0	0	1042.23	0	288.553	0	0	0	0	0	0	0	0	0	0	0	0	0	0	0	198.25	23.9511
myh9	chr15_77792242_77792271	266.345	1.02283	130.41	15.9793	0	0	0	0	68.704	0	0	0	0	0	0	0	0	0	0	0	44.271	117.228	0	59.7881	1582.07	0.514109	104.223	1.0263	0	0	0	0	0	0	0	0	0	0	0	0	0	0	0	0	0	23.9511
tmem132c	chr5_127553141_127553170	44.3909	188.201	245.258	146.325	62.7123	0	0	0	68.704	0	0	0	0	0	0	0	0	0.481508	0	0	315.924	117.228	0	29.8941	0.247353	0	52.1114	0	0	0	0	0	0	0	0	0	0	0	0	0	0	0	75.3397	75.5484	49.5625	0
scn2b	chr9_45125586_45125615	44.3909	195.873	189.114	83.5488	40.8908	0	0	0	0	0	0	0	0	0	0	0	0	0	0	0	171.985	117.228	0	0	0	0	0	0.256576	0	0	0	0	0	0	0	0	0	0	0	0	0	0	0	37.7742	0	0
lgals12	chr19_7603062_7603091	44.3909	35.7992	71.5089	63.004	58.5839	0	0	0	0	0	0	0	0	0	0	0	0	0	0	0	72.0853	117.228	219.687	29.8941	698.524	0.771164	104.223	171.393	0	0	0	0	0	0	0	0	0	0	0	1714.23	0	0	0	37.7742	0	0
slc19a3	chr1_83023004_83023033	44.3909	196.384	204.086	329.173	53.276	0	0	0	137.408	0	0	0	0	0	0	0	0	0	0	0	224.832	0	0	29.8941	0.247353	0	52.1114	0	0	0	0	0	0	0	0	0	0	0	0	0	0	0	75.3397	0	49.5625	23.9511
sfrp1	chr8_23412249_23412278	44.3909	164.421	76.0397	78.9833	61.7294	27.9818	0	0	0	0	0	0	0	0	0	0	0	0	0	0	151.124	0	0	0	0	0.257055	52.1114	0	0	0	0	0	0	0	0	0	0	0	0	0	0	0	0	0	49.5625	0
n4bp2	chr5_65793432_65793461	44.3909	139.361	145.973	434.636	27.1295	9.32726	50.9907	0	0	0	0	0	0	0	0	0	0	0	0	0	131.422	0	0	29.8941	0	0	52.1114	0	0	0	0	0	0	0	0	0	0	0	0	0	0	0	150.679	37.7742	99.1249	0
dnah6	chr6_73127925_73127954	44.3909	151.124	118.393	241.059	123.262	0	0	0	0	0	0	0	0	0	0	0	0	0	0	0	200.263	0	109.843	0	0	0	0	0	0	0	0	0	0	0	0	0	0	0	0	0	0	0	226.019	0	99.1249	0
cidea	chr18_67358747_67358776	44.3909	218.119	168.036	120.073	125.228	9.32726	0	0	0	0	0	0	0	0	0	0	0	0.481508	0	0	154.833	0	0	0	0	0	0	0	48.0922	0	0	0	0	0	0	0	0	0	0	0	0	0	0	0	0	0
npy5r	chr8_66682038_66682067	44.3909	243.69	257.865	304.976	472.996	0	50.9907	0	0	0	0	0	0	0	0	0	0	0.481508	0	0	291.586	0	109.843	0	0	0	52.1114	0	0	0	0	0	0	0	0	0	0	0	0	0	0	0	226.019	37.7742	49.5625	47.9021
hsd17b13	chr5_103970755_103970784	88.7818	213.772	164.096	130.345	133.878	9.32726	0	0	68.704	0	0	0	0	0	0	0	0	0	0	0	194.236	0	0	597.881	0	0.257055	0	0	0	0	0	0	0	0	0	0	0	0	0	0	0	0	0	37.7742	49.5625	23.9511
hba-a2	chr11_32283982_32284011	221.955	533.919	597.483	408.613	347.572	0	0	0	206.112	0.928573	0	44082.1	4.10373	0	12.9893	46.0895	0	0.963017	0	0	861.083	586.139	219.687	59.7881	0.247353	0	156.334	0.769727	0	0	1.12005	218.978	111.552	0	36.2209	0	0	0	109.502	10.9187	0	0	376.698	113.323	148.687	191.609
capza3	chr6_140041853_140041882	88.7818	368.987	175.128	448.561	145.673	18.6545	0	0	0	0	0	0	0	0	0	0	0	0	0	0	222.051	0	109.843	0	0	127.756	52.1114	0.256576	0	0	0	0	0	0	0	0	0	0	0	0	0	0	150.679	37.7742	99.1249	71.8532
fam189a2	chr19_23975600_23975629	88.7818	185.644	128.243	97.0171	111.27	9.32726	0	0	68.704	0	0	0	0	0	0	0	0	0	0	0	264.236	234.456	0	29.8941	0	0	0	0	0	0	0	0	0	0	0	0	0	0	0	0	0	0	0	0	99.1249	0
gabre	chrX_72269686_72269715	44.3909	159.562	154.443	144.955	254.978	0	0	0	0	0	0	0	0	0	0	0	0	0	0	0	201.653	0	0	0	0	0	52.1114	0	0	0	0	0	0	0	0	0	0	0	0	0	0	0	150.679	0	0	23.9511
bcor	chrX_12058084_12058113	88.7818	413.481	163.111	2084.38	1144.16	9.32726	0	0	0	0	0	0	0	0	0	0	0	0.481508	0.588496	0	213.243	117.228	0	0	0	0	0	0	0	0	0	0	0	0	0	0	0	0	0	0	0	0	226.019	188.871	446.062	215.56
erbb3	chr10_128579010_128579039	44.3909	265.681	216.103	270.506	66.0543	0	50.9907	0	68.704	0	0	0	0	0	0	0	0	1.44453	1.17699	0	343.97	117.228	0	29.8941	0.247353	0	0	0	0	0	0	0	0	0	0	0	0	0	0	92.8086	0	0	75.3397	75.5484	0	23.9511
vps13c	chr9_67950279_67950308	44.3909	153.936	115.636	132.628	46.3953	9.32726	50.9907	0	0	0	0	0	0	0	0	0	0	0	0	0	110.098	0	0	29.8941	0	0	0	0	0	0	0	0	0	0	0	0	0	0	0	0	0	0	75.3397	0	0	23.9511
clec3b	chr9_123156937_123156966	133.173	261.59	278.353	216.633	161.794	9.32726	0	0	68.704	0	0	0	0	0	0	0	0	0	0	0	320.559	586.139	219.687	119.576	1594.44	0.514109	469.003	26.4273	0	0	0	0	0	0	0	0	0	0	0	0	0	0	0	0	99.1249	71.8532
casq2	chr3_102127947_102127976	88.7818	202.777	253.925	309.313	319.459	0	0	0	0	0	0	0	0	0	0	0	0	0	0	0	292.977	117.228	219.687	59.7881	0	0	156.334	0.256576	0	0	0	0	0	0	0	0	0	0	0	0	0	0	150.679	75.5484	0	23.9511
tenm3	chr8_48235474_48235503	44.3909	181.042	148.928	277.811	67.0373	0	0	0	0	0	0	0	0	0	0	0	0	0	0	0	110.793	0	0	0	0	0	52.1114	0	0	0	0	0	0	0	0	0	0	0	0	0	0	0	0	0	0	23.9511
cfd	chr10_79891998_79892027	88.7818	273.608	172.173	357.023	273.85	0	0	0	68.704	0	0	0	0	0	0	0	0	0	0	0	250.792	0	0	29.8941	0.247353	0	0	0	0	0	0	0	0	0	0	0	0	0	0	0	0	0	75.3397	37.7742	49.5625	47.9021
tsc2	chr17_24607749_24607778	88.7818	181.809	152.867	495.358	982.165	0	0	0	0	0	0	0	0	0	0	0	0	0	0	0	352.082	117.228	0	29.8941	0	0	52.1114	0	0	0	0	0	0	0	0	0	0	0	0	0	0	0	75.3397	113.323	247.812	47.9021
defb15	chr8_21929947_21929976	44.3909	212.749	147.549	162.989	227.258	9.32726	50.9907	0	0	0	0	0	0	0	0	0	0	0.481508	0	0	187.051	0	109.843	0	0	0	0	0	0	0	0	0	0	0	0	0	0	0	0	0	0	0	150.679	37.7742	0	71.8532
card11	chr5_140906899_140906928	44.3909	115.325	166.066	134.683	129.356	0	0	0	0	0	15.8156	0	4.10373	5651.16	6.49467	0	0	0	0	0	212.084	0	0	0	0	0	0	0.256576	0	0	1.12005	72.9928	0	0	0	0	0	0	0	0	0	0	150.679	0	198.25	71.8532
slc27a6	chr18_58572197_58572226	488.3	173.626	92.3902	256.353	98.2952	27.9818	0	0	0	0	0	0	0	0	0	0	0	0	0	0	57.251	1523.96	439.373	448.411	10.1415	4.88404	1094.34	7059.94	0	0	0	0	0	0	0	0	0	0	0	0	0	0	75.3397	75.5484	49.5625	0
akap9	chr5_4046345_4046374	44.3909	152.402	165.672	85.1467	297.638	0	0	0	0	0	0	0	0	0	0	0	0	0	0	0	252.414	0	0	0	93.0046	0	52.1114	0	0	0	0	0	0	0	0	0	0	0	0	0	0	0	226.019	0	0	47.9021
cd300lg	chr11_102043022_102043051	88.7818	322.448	270.079	232.156	497.963	0	0	0	68.704	0	0	0	0	0	0	0	0	0.481508	0	0	431.353	0	109.843	0	0.247353	0	52.1114	0.256576	0	0	0	0	0	0	0	0	0	0	0	0	0	0	150.679	37.7742	0	47.9021
ephb1	chr9_101984187_101984216	44.3909	86.1738	121.348	223.253	57.7976	0	0	0	0	0	0	0	0	0	0	0	0	0	0.588496	0	54.006	117.228	0	0	0	0	52.1114	0	0	0	0	0	0	0	0	0	0	0	0	0	0	0	150.679	0	0	0
tenm3	chr8_48341097_48341126	44.3909	358.248	258.653	307.944	90.6281	9.32726	0	0	0	0	0	0	0	0	0	0	0	0.481508	0	0	325.195	117.228	0	29.8941	0	0	104.223	0	0	0	0	0	0	0	0	0	0	0	0	0	0	0	226.019	113.323	49.5625	95.8043
apob	chr12_8007145_8007174	44.3909	128.621	125.485	55.2427	32.8306	0	0	0	0	0	0	0	0	0	0	0	0	0	0	0	176.389	0	0	0	0	0	52.1114	0.256576	0	0	0	0	0	0	0	0	0	0	0	0	0	0	75.3397	0	49.5625	0
ntf5	chr7_45415826_45415855	88.7818	342.138	211.572	176.457	315.331	9.32726	0	0	0	0	0	0	0	0	0	0	0	0.481508	0.588496	0	222.282	0	0	89.6822	41.0605	0	0	0.256576	0	0	0	0	0	0	0	0	0	0	0	0	0	0	226.019	0	99.1249	47.9021
penk	chr4_4138005_4138034	44.3909	193.06	164.096	125.095	271.098	0	0	0	0	0	0	0	0	0	0	0	0	0.481508	0	0	113.111	0	0	0	0	0	0	0	0	0	0	0	0	0	0	0	0	0	0	0	0	0	0	113.323	49.5625	0
pigr	chr1_130841784_130841813	133.173	237.297	330.162	98.615	341.084	0	0	0	206.112	0	0	0	0	0	0	0	0	0	0	0	252.183	117.228	0	119.576	31.9085	0	52.1114	0.256576	0	0	0	0	0	0	0	0	0	0	0	0	0	0	226.019	75.5484	148.687	0
oit1	chr14_8353851_8353880	133.173	274.887	193.251	148.379	149.802	0	0	0	0	0	0	0	0	0	0	0	0	0	0	0	122.151	0	0	29.8941	770.256	0.257055	104.223	0	0	0	0	0	0	0	0	0	0	0	0	0	0	0	75.3397	37.7742	0	0
adra1a	chr14_66638295_66638324	88.7818	21.9909	231.862	34.013	0	0	0	0	0	0	0	0	0	0	0	0	0	0	0	0	192.846	0	109.843	0	95.4781	0.257055	0	0	0	0	0	0	0	0	0	0	0	0	0	0	0	0	0	0	49.5625	23.9511
mrgprx2	chr7_48482699_48482728	44.3909	71.5984	44.5207	28.5344	19.2659	0	0	0	0	0	0	0	0	0	0	0	0	0	0	0	13.2118	0	0	0	0	0	0	0	0	0	0	0	0	0	0	0	0	0	0	0	0	0	75.3397	37.7742	0	0
mrpl34	chr8_71465042_71465071	44.3909	104.84	219.648	51.5903	121.689	0	0	0	0	0	0	37413.1	12.3112	6.25128	6.49467	0	0	0	0	0	170.131	0	0	29.8941	0	0	0	0	0	0	0	145.986	111.552	34.4873	36.2209	0	0	0	219.005	0	0	0	150.679	37.7742	99.1249	0
men1	chr19_6337182_6337211	44.3909	285.115	230.483	172.805	334.007	0	0	0	137.408	0	0	0	0	0	0	0	0	0.963017	1.17699	0	324.5	117.228	0	29.8941	55.1596	0	0	0	0	0	0	0	0	0	0	0	0	0	0	0	0	0	75.3397	0	0	0
atr	chr9_95908421_95908450	44.3909	10.2283	74.0698	17.3489	0.19659	0	0	0	0	0	0	0	0	0	0	0	0	0	0	0	14.8343	0	0	0	0	0	0	43.6179	0	0	0	0	0	0	0	0	0	0	0	0	0	0	75.3397	0	49.5625	23.9511
glyat	chr19_12650259_12650288	88.7818	238.832	145.579	130.802	136.63	9.32726	0	0	0	0	0	0	0	0	0	0	0	0	0	0	229.699	0	0	29.8941	0	0	0	0.256576	0	0	0	0	0	0	0	0	0	0	0	0	0	0	0	37.7742	148.687	0
adh4	chr3_138422167_138422196	44.3909	194.338	127.849	179.653	215.463	0	0	0	68.704	0	0	0	0	0	0	0	0	0.481508	0	0	141.389	117.228	0	0	0	0	52.1114	0.256576	0	0	0	0	0	0	0	0	0	0	0	0	0	0	0	0	0	0
c6	chr15_4789541_4789570	44.3909	199.453	169.809	287.627	157.469	9.32726	0	0	0	0	0	0	0	0	0	0	0	0	0.588496	0	158.078	0	109.843	29.8941	0	0	52.1114	7.44069	0	0	0	0	0	0	0	944.285	0	0	0	0	0	0	150.679	37.7742	0	47.9021
zbtb16	chr9_48832204_48832233	88.7818	272.585	297.658	372.317	103.21	0	0	0	0	0	0	0	0	0	0	0	0	0	0	0	200.494	117.228	0	0	0.247353	0.257055	52.1114	0	0	0	0	0	0	0	0	0	0	0	0	0	0	0	150.679	113.323	99.1249	23.9511
sertm1	chr3_54899498_54899527	88.7818	238.832	214.527	97.0171	331.648	0	0	0	0	0	0	0	0	0	0	0	0	0.481508	0	0	340.261	117.228	219.687	29.8941	123.182	0	52.1114	0.256576	0	0	0	0	0	0	0	0	0	0	0	0	0	0	75.3397	0	148.687	23.9511
erbb3	chr10_128578439_128578468	44.3909	354.923	274.019	108.431	500.322	18.6545	0	0	68.704	0	0	0	0	0	0	0	0	0	1.17699	0	165.958	0	0	0	0	0	0	0	0	0	0	0	0	0	0	0	0	0	0	0	0	0	0	75.5484	0	47.9021
hhatl	chr9_121789505_121789534	44.3909	133.48	219.845	108.203	218.412	0	0	0	0	0	0	0	0	0	0	0	0	0	0	0	314.301	0	0	59.7881	0.247353	0.257055	52.1114	0	0	0	0	0	0	0	0	0	0	0	0	0	0	0	0	75.5484	49.5625	47.9021
ppp1r14a	chr7_29289509_29289538	88.7818	239.855	328.586	59.5799	236.302	0	0	0	0	0	0	0	0	0	0	0	0	0	0	0	291.123	0	28229.7	29.8941	0.247353	0	104.223	0	0	0	0	0	0	0	0	0	0	0	0	0	0	0	0	37.7742	49.5625	0
ube2m	chr7_13037613_13037642	88.7818	125.553	109.923	117.105	239.447	0	0	0	0	0	0	0	0	0	0	0	0	0.481508	0	0	75.0985	0	0	0	0	0	104.223	0	0	0	0	0	37.1841	0	0	0	0	0	0	0	0	0	45279.1	37.7742	0	47.9021
lcn10	chr2_25684023_25684052	133.173	502.723	454.662	173.718	266.38	0	0	0	412.224	0	0	0	0	0	0	0	0	0.481508	0.588496	0	300.162	117.228	0	29.8941	0.247353	0	0	0.256576	0	0	0	0	0	0	0	0	0	0	0	0	0	0	75.3397	75.5484	49.5625	71.8532
abi3bp	chr16_56596751_56596780	266.345	96.4021	58.7042	305.204	85.5168	0	0	0	0	0	0	0	0	0	0	0	0	0	0.588496	0	62.8139	703.367	439.373	269.047	0.742058	2327.63	469.003	8.21042	0	0	0	0	0	0	0	0	0	0	0	0	0	0	150.679	113.323	0	47.9021
plac9a	chr14_25890772_25890801	133.173	242.923	271.064	247.222	145.87	0	0	0	137.408	0	0	0	0	0	0	0	0	0	0	0	268.176	117.228	0	59.7881	25.23	290.729	0	0.256576	0	0	0	0	0	0	0	0	0	0	0	0	0	0	75.3397	75.5484	49.5625	0
wif1	chr10_121034978_121035007	44.3909	252.64	153.655	791.888	41.0874	0	0	0	68.704	0	0	0	0	0	0	0	0	0.481508	0.588496	0	120.76	468.911	0	29.8941	0.494705	0	0	0	0	0	0	0	0	0	0	0	0	0	0	0	0	0	0	75.5484	148.687	47.9021
ntrk3	chr7_78516723_78516752	44.3909	112.767	33.883	755.82	32.0442	0	0	0	68.704	0	0	0	0	0	0	0	0	0	0.588496	0	53.0789	0	0	0	0	0	52.1114	0	0	0	0	0	0	0	0	0	0	0	0	0	0	0	150.679	0	49.5625	0
csn1s1	chr5_87674220_87674249	44.3909	163.653	133.365	151.118	211.531	9.32726	0	0	0	0	0	0	0	0	0	0	0	0	0	0	130.727	0	0	0	0.247353	0	0	0	0	0	0	0	0	0	0	0	0	0	0	0	0	0	0	0	0	23.9511
slco1a5	chr6_142275491_142275520	88.7818	60.0915	129.031	0	0	0	0	0	0	0	0	0	0	0	0	0	0	0	0	0	28.046	234.456	0	0	76.432	0	0	0	0	0	0	0	0	0	0	0	0	0	0	0	0	0	0	37.7742	0	0
ryr3	chr2_112833920_112833949	44.3909	233.462	187.341	64.8302	258.909	0	0	0	68.704	0	0	0	0	0	0	0	0	0	1.17699	0	227.15	117.228	109.843	0	50.2126	0.257055	0	0.256576	0	0	1.12005	0	0	0	0	0	0	0	0	0	0	0	150.679	75.5484	49.5625	47.9021
myom1	chr17_71082222_71082251	88.7818	144.475	186.356	293.334	391.804	0	0	0	68.704	0	0	0	0	0	0	0	0	0	0	0	225.527	0	0	59.7881	0	0	52.1114	0	0	0	0	0	0	0	0	0	0	0	0	0	0	0	150.679	0	49.5625	47.9021
abca6	chr11_110218961_110218990	1198.55	147.032	144.988	32.6434	459.825	0	50.9907	0	0	0	0	335.544	0	0	0	0	0	0	0	0	241.289	117.228	0	0	0	0	52.1114	0	0	0	0	0	0	0	0	0	0	0	0	0	0	0	75.3397	0	99.1249	71.8532
arid1b	chr17_5321383_5321412	88.7818	276.421	202.313	156.369	439.379	0	0	0	0	0	0	0	0	0	0	0	0	0.481508	1.17699	0	152.515	117.228	0	29.8941	522.161	0.514109	104.223	0	0	0	0	0	0	0	0	0	0	0	0	0	0	0	0	0	99.1249	23.9511
fam189a2	chr19_23994773_23994802	44.3909	111.745	93.3752	153.401	60.943	0	0	0	0	0	0	0	0	0	0	0	0	0.481508	0	0	181.952	234.456	0	29.8941	0	0.257055	0	0.256576	0	0	0	0	0	0	0	0	0	0	0	0	0	0	150.679	0	49.5625	0
samd5	chr10_9674689_9674718	133.173	355.946	266.533	375.741	484.399	18.6545	0	0	0	0	0	0	0	0	0	0	0	0.481508	0.588496	0	200.958	0	0	29.8941	0.247353	511.281	104.223	0.256576	0	0	0	0	0	0	0	0	0	0	0	0	0	0	301.359	37.7742	198.25	47.9021
btnl9	chr11_49180847_49180876	88.7818	160.329	167.248	244.711	84.5338	0	0	0	0	0	0	0	0	0	0	0	0	0	0	0	84.6017	0	0	0	0	0	0	0	0	0	0	0	0	0	0	0	0	0	0	0	0	0	0	37.7742	99.1249	0
pgm5	chr19_24861609_24861638	88.7818	242.412	238.954	120.301	101.834	0	0	0	0	0	0	0	0	0	0	0	0	0.481508	0	0	345.129	117.228	109.843	59.7881	0.742058	0	104.223	0	0	0	0	0	0	0	0	0	0	0	0	0	0	0	75.3397	37.7742	49.5625	23.9511
tmem132c	chr5_127359736_127359765	88.7818	166.466	123.712	107.061	0.19659	0	101.981	0	0	0	0	0	0	0	0	0	0	0	0.588496	0	145.561	117.228	0	0	0	66.063	104.223	0	0	0	0	0	0	0	0	0	0	0	0	0	0	0	0	0	0	0
hepacam	chr9_37381571_37381600	44.3909	193.571	251.955	172.12	292.723	0	0	0	0	0	0	0	0	0	0	0	0	0	0	0	214.633	0	0	29.8941	0	0	52.1114	0.256576	0	0	0	0	0	0	0	0	0	0	0	0	0	0	301.359	0	247.812	23.9511
trp63	chr16_25889143_25889172	44.3909	323.727	417.43	977.247	264.021	18.6545	50.9907	0	0	0	0	0	0	0	0	0	0	0	0	0	337.48	0	0	0	0	0	104.223	0	0	0	0	0	0	0	0	0	0	0	0	0	0	0	226.019	113.323	148.687	119.755
dnah8	chr17_30693991_30694020	133.173	178.74	146.367	144.955	170.444	0	101.981	0	68.704	0	0	0	0	0	0	0	0	0.481508	0.588496	0	207.68	468.911	549.217	179.364	2.72088	0.771164	625.337	2883.91	0	0	0	0	0	0	0	0	0	0	0	0	0	0	0	75.5484	49.5625	0
pnpt1	chr11_29133896_29133925	44.3909	75.6897	166.46	0.456551	128.57	0	0	0	0	0	0	0	0	0	0	0	0	0	0	0	128.409	0	0	0	0	0	0	0	0	0	0	0	0	0	0	0	0	0	0	0	0	0	0	0	49.5625	23.9511
elf5	chr2_103442818_103442847	88.7818	124.274	161.929	83.0923	1146.51	0	0	0	0	0	0	0	0	0	0	0	0	0	0	0	218.11	117.228	219.687	59.7881	0	0	0	0	0	0	0	0	0	0	0	0	0	0	0	0	0	0	0	37.7742	148.687	47.9021
nsg1	chr5_38155645_38155674	88.7818	270.028	197.191	90.3971	513.887	9.32726	0	0	68.704	0	0	0	0	0	0	0	0	0	0	0	142.78	117.228	109.843	89.6822	0	204.101	0	0	0	0	0	0	0	0	0	0	0	0	0	0	0	0	75.3397	37.7742	297.375	47.9021
cdh20	chr1_104953960_104953989	266.345	212.749	196.6	60.0364	518.998	0	50.9907	0	0	0	0	0	0	0	0	0	0	0	0	0	201.19	117.228	109.843	179.364	431.63	849.308	104.223	566.263	0	0	0	0	0	0	0	0	0	0	0	0	0	0	75.3397	0	0	71.8532
	NA_NA_NA	88.7818	199.453	165.278	206.818	136.04	9.32726	0	0	68.704	0	0	0	0	0	0	0	0	0	0	0	286.95	0	0	29.8941	78.4108	0.257055	52.1114	0	0	0	0	0	0	0	0	0	0	0	0	0	0	0	0	37.7742	49.5625	0
grik1	chr16_88051516_88051545	88.7818	280.256	235.014	359.99	268.936	27.9818	0	0	0	0	0	0	0	0	0	0	0	0	0.588496	0	284.401	0	0	29.8941	0	0	52.1114	0	0	0	0	0	0	0	0	0	0	0	0	0	0	0	150.679	37.7742	49.5625	0
slc13a2	chr11_78404760_78404789	44.3909	189.48	168.036	248.135	98.6883	0	0	0	0	0	0	0	0	0	0	0	0	0	0	0	207.216	0	0	0	0.247353	0	0	0	0	0	0	0	0	0	0	0	0	0	0	0	0	0	150.679	37.7742	99.1249	23.9511
lvrn	chr18_46850594_46850623	44.3909	195.873	199.949	173.261	147.443	0	0	0	0	0	0	0	0	0	0	0	0	0	0	0	189.369	0	0	29.8941	0	0	0	0	0	0	0	0	0	0	0	0	0	0	0	0	0	0	75.3397	0	49.5625	47.9021
fam107a	chr14_8301099_8301128	221.955	257.754	284.262	153.173	357.598	0	0	0	0	0	0	0	0	0	0	0	0	0	0	0	255.428	117.228	109.843	59.7881	925.594	0.771164	52.1114	1.0263	0	0	0	0	0	0	0	0	0	0	0	0	0	0	150.679	75.5484	49.5625	71.8532
synm	chr7_67759184_67759213	88.7818	278.211	209.405	126.008	161.007	0	50.9907	0	68.704	0	0	0	0	0	0	0	0	1.44453	0	0	182.415	234.456	0	29.8941	0	0.257055	52.1114	0	0	0	0	0	0	0	0	0	0	0	0	0	0	0	0	37.7742	0	23.9511
matn2	chr15_34423702_34423731	44.3909	131.178	241.909	90.6254	266.97	0	0	0	0	0	0	0	0	0	0	0	0	0	0	0	302.712	0	0	89.6822	0.247353	0	104.223	0	0	0	0	0	0	0	0	0	0	0	0	0	0	0	75.3397	0	49.5625	47.9021
rasgef1c	chr11_49958693_49958722	88.7818	225.279	272.049	188.556	167.495	0	0	0	137.408	0	0	0	0	0	0	0	0	0	0	0	273.275	0	0	179.364	0.247353	0.257055	52.1114	0.513151	0	0	0	0	0	0	0	0	0	0	0	0	0	0	75.3397	0	49.5625	47.9021
csn3	chr5_87929938_87929967	133.173	339.837	208.223	325.293	182.239	9.32726	0	0	68.704	0	0	0	0	0	0	0	0	0.481508	0	0	246.156	0	0	29.8941	0	0	0	0	0	0	0	0	0	0	0	0	0	0	0	0	0	0	75.3397	75.5484	49.5625	47.9021
ces1g	chr8_93333706_93333735	44.3909	153.681	147.549	64.602	93.1838	18.6545	0	0	0	0	0	0	0	0	0	0	0	0	0	0	134.436	0	0	0	0	0	0	0	0	0	0	0	0	0	0	0	0	0	0	0	0	0	0	37.7742	0	71.8532
hoxa6	chr6_52208327_52208356	44.3909	154.704	145.185	56.6123	746.453	0	0	0	0	0	0	0	0	0	0	0	0	0	0	0	165.727	0	0	0	0	0	0	0	0	0	0	0	0	0	0	0	0	0	0	0	0	0	0	37.7742	0	47.9021
igfbp6	chr15_102144713_102144742	44.3909	526.504	443.237	732.308	356.025	0	0	0	0	0	0	0	4.10373	0	0	34428.8	0	0.481508	0	0	364.83	0	109.843	29.8941	0	0	0	0.256576	0	0	0	0	0	0	0	0	0	0	109.502	0	0	0	150.679	151.097	99.1249	95.8043
lpl	chr8_68880822_68880851	88.7818	135.27	204.874	127.606	130.143	0	50.9907	0	0	0	0	0	0	0	0	0	0	0	0	0	318.705	0	0	89.6822	0.494705	0	52.1114	0.256576	0	0	0	0	0	0	0	0	0	0	0	0	0	0	0	37.7742	0	0
tnxb	chr17_34671076_34671105	44.3909	352.111	301.795	663.368	262.645	27.9818	50.9907	0	0	0	0	0	0	0	0	0	0	0.481508	0	0	224.368	234.456	109.843	0	286.434	0.514109	0	0	0	0	0	0	0	0	0	0	0	0	0	0	0	0	0	113.323	247.812	71.8532
dnah9	chr11_66029363_66029392	177.564	292.275	254.122	435.321	265.79	0	0	0	0	0	0	0	0	0	0	0	0	0	0	0	171.521	117.228	109.843	179.364	1027.5	0.771164	208.446	0	0	0	0	0	0	0	0	0	0	0	0	0	0	0	150.679	75.5484	49.5625	95.8043
efcab1	chr16_14916900_14916929	44.3909	70.3198	74.6608	83.5488	259.892	0	0	0	0	0	0	0	0	0	0	0	0	0	0.588496	0	121.456	117.228	0	0	0	0	0	0.256576	0	0	0	0	0	0	0	0	0	0	0	0	0	0	0	37.7742	0	47.9021
scn5a	chr9_119529116_119529145	88.7818	315.289	288.005	133.769	565.394	0	0	0	206.112	0	0	0	0	0	0	0	0	0	0.588496	0	466.121	0	0	59.7881	0	0	52.1114	0.256576	0	0	0	0	0	0	0	0	0	0	0	0	0	0	226.019	37.7742	148.687	71.8532
sfrp1	chr8_23411940_23411969	177.564	264.403	202.707	344.011	289.578	0	0	0	0	0	0	0	0	0	0	0	0	0	0	0	368.307	0	109.843	29.8941	0	0	0	0	432.83	0	0	0	0	0	0	0	0	0	0	0	0	0	150.679	75.5484	49.5625	119.755
mrgprx1	chr7_48021754_48021783	44.3909	77.7354	125.288	18.4903	74.7043	0	0	0	0	0	0	0	0	0	0	0	0	0	0	0	126.555	117.228	0	29.8941	0	0	0	0	0	0	0	0	0	0	0	0	0	0	0	0	0	0	0	0	49.5625	23.9511
slc22a12	chr19_6542354_6542383	44.3909	192.548	169.021	114.823	196.787	0	0	3.4318	68.704	0	31.6312	0	0	0	0	0	0	0	0.588496	0.738142	183.806	468.911	0	209.259	1.97882	3.85582	729.56	5.90124	9955.09	37.6935	0	0	0	0	0	0	35.3375	0	109.502	0	0	119.117	150.679	0	0	0
marco	chr1_120476644_120476673	44.3909	114.302	74.8578	41.0896	32.634	0	0	0	0	0	0	0	0	0	0	0	0	0.481508	0	0	70.6946	0	0	29.8941	0	0	52.1114	0	0	0	0	0	0	0	0	0	0	0	0	0	0	0	0	0	0	0
akap9	chr5_3960241_3960270	44.3909	253.151	133.365	210.698	226.472	0	0	0	68.704	0	0	0	0	0	0	0	0	0	0	0	180.329	0	0	0	0	0	0	0	0	0	0	0	0	0	0	0	0	0	0	0	0	0	75.3397	0	49.5625	119.755
tars2	chr3_95753113_95753142	44.3909	149.845	106.574	122.584	61.5328	0	50.9907	6.8636	0	0	0	0	0	0	0	0	145.986	0	0	0.738142	166.19	117.228	0	29.8941	0	0	52.1114	0	0	75.387	0	72.9928	37.1841	0	0	0	128929	0	0	0	28.2019	0	0	37.7742	49.5625	23.9511
fras1	chr5_96682291_96682320	44.3909	58.5572	143.215	20.0882	128.963	0	0	0	0	0	0	0	0	0	0	0	0	0	0	0	106.39	117.228	0	89.6822	0	0	0	0	0	0	0	0	0	0	0	0	0	0	0	0	0	0	0	37.7742	49.5625	0
lalba	chr15_98482093_98482122	88.7818	117.37	125.485	50.6771	16.7102	0	0	0	0	0	0	13.981	0	4707.22	0	0	0	0	0.588496	0	117.979	0	109.843	0	0	0	0	0	0	0	2.2401	72.9928	0	0	36.2209	5.18838	0	0	0	5.45933	14.101	0	0	0	0	71.8532
pten	chr19_32799886_32799915	88.7818	198.43	87.2684	1747.91	405.173	0	8923.37	3232.75	68.704	0	0	0	0	0	0	19449.8	0	0	0.588496	1.47628	182.879	351.683	37676.3	6845.74	200.108	9.25396	8285.71	46.1836	29480.5	37.6935	0	0	37.1841	0	0	0	35.3375	0	0	0	0	50.1812	527.378	113.323	99.1249	71.8532
gpx3	chr11_54908547_54908576	88.7818	103.818	104.407	74.6461	0.19659	0	0	0	0	0	0	0	0	0	0	0	0	0	0	0	109.171	0	0	59.7881	0.247353	0	0	0	0	0	0	0	0	0	0	0	0	0	0	0	0	0	0	37.7742	0	0
lpl	chr8_68887571_68887600	44.3909	71.8541	68.16	41.5461	105.372	0	50.9907	0	0	0	0	0	0	0	0	0	0	0	0	0	77.4164	0	0	0	0	0	52.1114	0	0	0	0	0	0	0	0	0	0	0	0	0	0	0	0	0	0	0
csn1s1	chr5_87672177_87672206	44.3909	47.0504	51.4155	173.033	0.982952	0	0	0	0	0	0	0	0	0	0	0	0	0	0	0	51.4564	0	0	0	0	0	0	0	0	0	0	0	0	0	0	0	0	0	0	0	0	0	0	0	49.5625	0
gata3	chr2_9877378_9877407	133.173	185.389	149.716	64.8302	55.0453	18.6545	0	0	274.816	0	0	0	0	0	0	0	0	0	0.588496	0	205.362	117.228	219.687	89.6822	438.062	0	104.223	0.256576	0	0	0	0	0	0	0	0	0	0	0	0	0	0	0	0	0	0
hlf	chr11_90390294_90390323	177.564	327.051	318.539	96.3322	126.604	27.9818	50.9907	0	68.704	0	0	0	0	0	0	0	0	2.88905	1.76549	0	327.049	3165.15	109.843	179.364	1707.72	1.02822	104.223	0	2116.06	0	0	0	0	0	0	0	0	0	0	0	0	0	226.019	75.5484	198.25	95.8043
alx4	chr2_93668648_93668677	44.3909	347.764	261.017	83.7771	655.825	0	50.9907	0	0	0	0	0	0	0	0	0	0	0	0	0	316.155	117.228	0	59.7881	0	0	104.223	0	0	0	0	0	0	0	0	0	0	0	0	0	0	0	75.3397	37.7742	148.687	47.9021
cmtm5	chr14_54938580_54938609	88.7818	152.914	226.346	102.724	148.229	0	0	0	0	0	0	0	0	0	0	0	0	0	0.588496	0	225.991	234.456	0	0	0	0	0	0	0	0	0	0	0	0	0	0	0	0	0	0	0	0	150.679	0	49.5625	0
1700009n14rik	chr4_39450943_39450972	88.7818	166.466	205.465	105.007	71.7555	0	0	0	68.704	0	0	0	0	0	0	0	0	0	0	0	308.507	117.228	109.843	0	0	0	104.223	0.256576	0	0	0	0	0	0	0	0	0	0	0	0	0	0	150.679	0	0	23.9511
fgfbp1	chr5_43979797_43979826	177.564	293.553	269.882	348.577	147.246	18.6545	0	0	0	0	0	0	0	0	0	0	0	0	0.588496	0	469.597	117.228	0	29.8941	0	0	104.223	0	0	0	0	0	0	0	0	0	0	0	0	0	0	0	0	37.7742	99.1249	23.9511
folr1	chr7_101859465_101859494	88.7818	179.763	164.884	141.987	51.1135	9.32726	0	0	137.408	0	0	0	0	0	0	0	0	0	0.588496	0	149.27	0	0	0	0	0	0	0.256576	0	0	0	0	0	0	0	0	0	0	0	0	0	0	0	75.5484	49.5625	0
cmtm5	chr14_54936675_54936704	88.7818	748.203	692.434	609.495	877.776	0	0	0	68.704	0	0	0	0	0	0	0	0	0.963017	0	0	634.861	586.139	0	0	21.025	0	52.1114	0	0	0	0	0	0	0	0	0	0	0	0	0	0	0	452.038	37.7742	297.375	71.8532
dpp6	chr5_27049789_27049818	88.7818	208.914	303.174	180.338	160.811	0	0	0	137.408	0	0	0	0	0	0	0	0	0.481508	0	0	273.97	0	0	59.7881	0.247353	0	0	0	0	0	0	0	0	0	0	0	0	0	0	0	0	0	75.3397	37.7742	148.687	0
defb34	chr8_19126422_19126451	88.7818	89.2423	139.275	94.0495	128.57	9.32726	0	0	0	0	0	0	0	0	0	0	0	0	0	0	183.806	0	0	0	0	0	104.223	0.256576	0	0	0	0	0	0	0	0	0	0	0	0	0	0	75.3397	0	49.5625	0
cryab	chr9_50753335_50753364	88.7818	108.165	90.8143	99.0715	45.609	0	0	0	0	0	0	0	0	0	0	0	0	0	0.588496	0	83.9064	0	0	0	0	0	52.1114	0	0	0	0	0	0	0	0	0	0	0	0	0	0	0	75.3397	37.7742	148.687	23.9511
c1qtnf9	chr14_60772423_60772452	88.7818	189.48	221.815	134.226	130.143	0	50.9907	0	68.704	0	0	0	0	0	0	0	0	0	0	0	284.633	117.228	219.687	59.7881	0.494705	0.514109	0	147.788	0	0	0	0	0	0	0	0	0	0	0	0	0	0	150.679	0	99.1249	23.9511
olfm4	chr14_80000388_80000417	44.3909	194.338	220.239	62.5475	181.846	0	50.9907	0	0	0	0	0	0	0	0	0	0	0	0	0	119.601	0	0	0	165.726	0	52.1114	0	0	0	0	0	0	0	0	0	0	0	0	0	0	0	75.3397	37.7742	0	95.8043
cntnap3	chr13_64771948_64771977	88.7818	237.809	286.232	1354.81	168.478	0	0	0	206.112	0	0	0	0	0	0	0	0	0	0	0	268.176	0	0	0	0	0	156.334	0.513151	0	0	0	0	0	0	0	0	0	0	0	0	0	0	226.019	151.097	297.375	71.8532
dido1	chr2_180675277_180675306	177.564	329.097	138.881	196.089	90.4315	0	0	0	68.704	0	0	0	0	0	0	0	0	0.481508	0	0	152.515	234.456	219.687	29.8941	1051.74	0.514109	104.223	0.513151	0	0	0	0	0	0	0	0	0	0	0	0	0	0	0	37.7742	0	71.8532
a530016l24rik	chr12_112496907_112496936	88.7818	327.051	185.765	123.04	385.317	9.32726	0	0	0	0	0	0	0	0	0	0	0	0	0	0	181.256	0	0	59.7881	0.247353	0	52.1114	0	0	0	0	0	0	0	0	0	0	0	0	0	0	0	226.019	0	0	23.9511
chst9	chr18_15453277_15453306	44.3909	29.6622	38.4138	33.3282	61.3362	9.32726	0	0	0	0	0	0	0	0	0	0	0	0	0	0	45.43	0	109.843	0	0.247353	0	0	0	0	0	0	0	0	0	0	0	0	0	0	0	0	0	75.3397	0	0	23.9511
tmem100	chr11_90035549_90035578	44.3909	227.325	381.184	115.507	62.7123	9.32726	50.9907	0	0	0	0	0	0	0	0	0	0	0	0	0	235.726	117.228	109.843	29.8941	0	0	0	0.513151	0	0	0	0	0	0	0	0	0	6.98655	140273	0	0	0	75.3397	37.7742	297.375	95.8043
galnt15	chr14_32056344_32056373	44.3909	323.727	195.221	192.893	208.189	0	0	0	0	0	0	0	0	0	0	0	0	0	0	0	188.21	117.228	0	0	0	0	0	0	0	0	0	0	0	0	0	0	0	0	0	0	0	0	150.679	37.7742	49.5625	119.755
foxa1	chr12_57543046_57543075	88.7818	685.043	678.054	340.587	750.778	18.6545	0	0	68.704	0	0	0	0	0	0	0	0	0.963017	0.588496	0	422.545	117.228	0	119.576	19.7882	0.257055	0	24.6313	0	0	0	0	0	0	0	0	0	0	0	0	0	0	301.359	226.645	247.812	23.9511
muc6	chr7_141646981_141647010	44.3909	168.768	265.942	67.5695	140.169	0	50.9907	0	0	0	0	24075.3	0	6.25128	6.49467	0	0	0	0	0	290.195	351.683	0	29.8941	0	0.257055	52.1114	0	0	0	3.36015	0	37.1841	0	36.2209	0	0	0	0	0	28.2019	0	0	75.5484	198.25	71.8532
cldn11	chr3_31150318_31150347	44.3909	67.2513	141.836	45.4268	262.841	9.32726	0	0	0	0	0	0	0	0	0	0	0	0	0	0	196.091	0	0	59.7881	0	72.2323	0	0.256576	0	0	0	0	0	0	0	0	0	0	0	0	0	0	150.679	0	49.5625	0
lrrc2	chr9_110960790_110960819	44.3909	233.462	223.194	169.152	150.195	9.32726	0	0	0	0	0	0	0	0	0	0	0	0	0.588496	0	138.376	0	0	29.8941	7.91529	75.574	0	0	0	0	0	0	0	0	0	0	0	0	0	0	0	0	0	37.7742	49.5625	23.9511
prrc2b	chr2_32214428_32214457	44.3909	473.572	469.437	351.088	248.883	214.527	764.86	0	1099.26	0	0	0	0	0	0	0	0	799.304	34836	0	321.023	117.228	0	29.8941	25.972	0.257055	104.223	0	0	0	0	0	0	0	0	0	0	0	0	0	0	0	150.679	0	49.5625	407.168
slc2a4	chr11_69945300_69945329	44.3909	177.206	167.051	34.6979	128.963	0	0	0	0	0	0	0	0	0	0	0	0	0	0	0	207.216	234.456	0	29.8941	0	0	0	0.256576	0	0	0	0	0	0	0	0	0	0	0	0	0	44.0987	0	75.5484	198.25	0
huwe1	chrX_151898472_151898501	88.7818	25.5708	116.03	0.228275	0	0	0	0	0	0	0	0	0	0	0	0	0	0	0	0	23.1786	0	0	0	0	0	0	0	0	0	0	0	0	0	0	0	0	0	0	0	0	0	0	0	0	0
slc2a4	chr11_69945661_69945690	88.7818	71.3427	235.014	27.6213	22.8045	0	0	0	0	0	0	0	0	0	0	0	0	0	0	0	100.595	0	0	0	0	0	0	0	0	0	0	0	0	0	0	0	0	0	0	0	0	0	0	37.7742	49.5625	0
hhatl	chr9_121789145_121789174	88.7818	295.855	217.087	347.207	246.524	27.9818	0	0	0	0	0	13.981	0	0	7748.14	0	72.9928	0	0	0	359.731	0	219.687	29.8941	0	136.496	52.1114	0.256576	0	0	0	0	0	0	0	0	0	0	0	0	0	0	75.3397	0	49.5625	47.9021
nsd1	chr13_55282726_55282755	177.564	377.681	517.503	268.452	867.356	0	0	0	0	0	0	0	0	0	0	0	0	0.481508	0	0	545.623	0	109.843	149.47	0.494705	0.257055	0	110.071	0	0	0	0	0	0	0	0	0	0	0	0	0	0	226.019	75.5484	198.25	23.9511
mfap4	chr11_61486156_61486185	44.3909	63.9271	80.7676	42.6875	67.0373	0	0	0	68.704	0	0	0	0	0	0	0	0	0	0	0	136.753	117.228	0	59.7881	0	0	0	0	0	0	0	0	0	0	0	0	0	0	0	0	0	0	0	0	99.1249	0
hspb7	chr4_141421796_141421825	44.3909	152.402	164.293	91.5385	357.008	9.32726	0	0	0	0	0	0	0	0	0	0	0	0	0	0	137.912	117.228	0	0	0	0	0	0	0	0	0	0	0	0	0	0	0	0	0	0	0	0	0	0	0	23.9511
fosb	chr7_19309355_19309384	44.3909	246.247	139.866	102.952	257.14	9.32726	0	0	0	0	0	0	0	0	0	0	0	0	0	0	189.832	117.228	0	0	0	0	156.334	0	0	0	0	0	0	0	0	0	0	0	0	0	0	0	75.3397	37.7742	99.1249	47.9021
rdh5	chr10_128917921_128917950	44.3909	403.508	333.708	397.199	675.878	0	50.9907	0	0	0	0	0	0	0	0	0	0	0	0	0	250.097	117.228	109.843	0	0	0	52.1114	0	0	0	0	0	0	0	0	0	0	0	0	0	0	0	150.679	75.5484	99.1249	47.9021
aspa	chr11_73324312_73324341	44.3909	85.6623	87.4654	123.497	13.3681	0	0	0	0	0	0	0	0	0	0	0	0	0	0.588496	0	82.9792	0	0	0	0	0.257055	0	0	0	0	0	0	0	0	0	0	0	0	0	0	0	0	150.679	0	49.5625	0
gpihbp1	chr15_75597943_75597972	88.7818	284.348	271.458	137.194	398.489	0	0	0	0	0	0	0	0	0	0	0	0	0	0.588496	0	347.91	0	0	29.8941	0	0	52.1114	0.256576	0	0	0	0	37.1841	8070.02	0	0	0	0	0	5.45933	0	0	0	37.7742	49.5625	0
samd5	chr10_9674707_9674736	88.7818	318.613	349.861	426.19	419.524	18.6545	0	0	0	0	0	0	0	0	0	0	0	0	0	0	430.426	351.683	109.843	29.8941	190.462	0.257055	52.1114	0.256576	0	0	0	0	0	0	0	0	0	0	0	0	0	0	226.019	75.5484	198.25	71.8532
dcc	chr18_71456911_71456940	44.3909	232.95	172.764	197.002	363.102	0	0	0	0	0	0	0	0	0	0	0	0	0.481508	0	0	112.184	0	0	29.8941	0	0	0	0.256576	0	0	0	0	0	0	0	0	0	0	0	0	0	0	150.679	75.5484	99.1249	47.9021
bhmt2	chr13_93671446_93671475	44.3909	215.818	152.67	187.414	210.548	0	0	0	0	0	0	0	0	0	0	0	0	0.481508	0.588496	0	183.111	0	0	0	0	0	0	0.256576	0	0	0	0	0	0	0	0	0	0	0	0	0	0	0	0	99.1249	23.9511
apob	chr12_8013081_8013110	44.3909	240.11	244.864	275.985	197.966	0	0	0	0	0	0	0	0	0	0	0	0	0	0	0	230.163	234.456	0	29.8941	0	0.257055	52.1114	0.256576	0	0	0	0	0	0	0	0	0	0	0	0	0	0	0	0	49.5625	47.9021
apod	chr16_31297549_31297578	88.7818	607.563	356.165	305.661	315.527	0	0	0	68.704	0	0	0	0	0	0	0	0	0.481508	0	0	221.819	117.228	109.843	29.8941	107.846	0.257055	0	0	0	0	0	0	0	0	0	0	0	0	0	0	0	0	75.3397	188.871	49.5625	95.8043
neb	chr2_52237103_52237132	44.3909	104.585	95.7391	208.872	155.896	0	0	0	0	0	0	0	0	0	0	0	0	0	0	0	190.064	0	109.843	29.8941	79.6476	0	104.223	0.256576	0	0	0	0	0	0	0	0	0	0	0	0	0	0	0	75.5484	0	23.9511
ppp1r1a	chr15_103537799_103537828	88.7818	321.681	260.032	156.14	410.677	0	0	0	68.704	0	0	0	0	0	0	0	0	0	0	0	169.203	0	0	29.8941	0	0	0	0.256576	0	0	0	0	0	0	0	0	0	0	0	0	0	0	0	0	99.1249	47.9021
abcb5	chr12_118918218_118918247	44.3909	212.494	268.7	248.135	199.932	0	0	37.7498	0	0	0	0	0	0	0	230.447	0	0	0	11546	367.148	0	0	119.576	0	0	52.1114	1.0263	0	150.774	0	0	0	0	0	0	70.675	0	657.015	10.9187	0	0	75.3397	0	49.5625	23.9511
cpa1	chr6_30641536_30641565	44.3909	135.014	151.094	91.3102	40.301	0	0	0	68.704	0	0	0	0	0	0	0	0	0	0.588496	0	97.1181	0	0	29.8941	0	0	0	0.256576	0	0	0	0	0	0	0	0	0	0	0	0	0	0	75.3397	0	0	0
adcy5	chr16_35156550_35156579	88.7818	388.421	489.333	508.826	218.805	9.32726	101.981	0	0	0	0	0	0	0	0	0	0	0	0	0	363.208	0	0	59.7881	0	0.257055	0	0.256576	0	0	0	0	0	0	0	0	0	0	0	0	0	0	0	37.7742	148.687	95.8043
meox1	chr11_101893718_101893747	44.3909	338.047	367.985	676.38	288.005	0	0	0	0	0	0	0	0	0	0	0	0	0	0	0	485.591	0	549.217	89.6822	0.247353	0	156.334	0.256576	1538.95	0	0	0	0	0	0	0	0	0	0	0	0	0	150.679	226.645	247.812	23.9511
klk7	chr7_43812009_43812038	88.7818	258.266	343.755	692.359	511.331	0	0	0	137.408	0	0	0	0	0	0	0	0	0	0	0	308.043	117.228	109.843	179.364	121.203	0.514109	52.1114	0	0	0	0	0	0	0	0	0	0	0	0	0	0	0	226.019	37.7742	198.25	71.8532
tat	chr8_109991540_109991569	88.7818	155.982	95.1481	44.5137	154.913	0	0	0	0	0	0	0	0	0	0	0	0	0	0	0	298.076	0	0	0	0	0.257055	0	0	0	0	0	0	0	0	0	0	9876.84	0	0	0	0	0	0	37.7742	99.1249	0
sgcg	chr14_61232444_61232473	177.564	451.581	413.491	365.012	515.46	0	0	0	137.408	0	0	0	0	0	0	0	0	0	0	0	358.109	0	109.843	0	12.1203	0	0	0	0	0	0	0	0	0	0	0	0	0	0	0	0	0	376.698	37.7742	148.687	47.9021
mrgpra2a	chr7_47427130_47427159	44.3909	173.626	149.519	121.671	130.143	0	0	0	68.704	0	0	0	0	0	0	0	0	0	0	0	255.659	117.228	109.843	89.6822	0	0	0	0	0	0	0	0	0	0	0	0	0	0	0	0	0	0	75.3397	0	0	0
gdf10	chr14_33924045_33924074	44.3909	315.544	260.229	206.818	472.8	9.32726	50.9907	0	206.112	0	0	0	0	0	0	0	0	0	0	0	193.773	117.228	0	59.7881	0	0.514109	104.223	0.256576	0	0	0	0	0	0	0	0	0	0	0	0	0	0	75.3397	113.323	148.687	23.9511
ptchd3	chr11_121831142_121831171	88.7818	231.672	151.488	70.0806	113.826	0	0	0	0	0	0	0	0	0	0	0	0	0	0	0	248.706	117.228	0	89.6822	154.595	0.257055	0	0	0	0	0	0	0	0	0	0	0	0	0	0	0	0	75.3397	37.7742	0	71.8532
abcd2	chr15_91182748_91182777	88.7818	255.197	169.021	219.601	156.682	9.32726	0	0	68.704	0	0	0	0	0	0	0	0	0	0.588496	0	222.051	117.228	219.687	0	0	0	52.1114	0	0	0	0	0	0	0	0	0	0	0	0	0	0	0	0	37.7742	0	0
pclo	chr5_14677758_14677787	44.3909	186.156	210.981	384.188	336.366	0	0	0	0	0	0	0	0	0	0	0	0	0	0	0	201.885	0	0	59.7881	0	0	0	0	0	0	0	0	0	0	0	0	0	0	0	0	0	0	0	113.323	148.687	0
zfhx3	chr8_108946530_108946559	44.3909	172.092	234.029	33.5565	78.4395	0	0	0	68.704	0	0	13.981	4.10373	5544.89	12.9893	0	0	0	0	0	273.043	351.683	0	119.576	0.742058	1.02822	0	306.865	0	0	0	72.9928	37.1841	34.4873	0	0	0	0	0	5.45933	14.101	0	0	37.7742	148.687	95.8043
efcab1	chr16_14920850_14920879	310.736	176.95	259.638	166.413	538.461	0	0	0	0	0	0	0	0	0	0	0	0	0	0	0	301.089	1172.28	549.217	239.153	3828.28	1.54233	469.003	1.28288	0	0	0	0	0	0	0	0	0	0	0	0	0	0	0	0	148.687	23.9511
emilin3	chr2_160912030_160912059	44.3909	300.202	399.11	492.162	122.869	0	0	0	0	0	0	0	0	0	0	0	0	0	0	0	379.665	234.456	0	89.6822	0.247353	0.257055	0	0.256576	0	0	0	0	0	0	0	0	0	0	0	0	0	0	226.019	151.097	99.1249	119.755
inmt	chr6_55173303_55173332	44.3909	101.516	260.82	72.8199	48.951	0	0	0	68.704	0	0	0	0	0	0	0	0	0	0	0	215.097	117.228	0	0	0.247353	0	104.223	0.256576	0	0	0	0	0	0	0	0	0	0	0	0	0	0	150.679	0	49.5625	23.9511
trf	chr9_103222124_103222153	44.3909	205.845	156.413	80.8095	99.4747	0	0	0	0	0	0	0	0	0	0	0	0	0	0	0	88.7739	117.228	0	29.8941	0.247353	0	0	0.256576	0	0	0	0	0	0	0	0	0	0	0	0	0	0	0	37.7742	49.5625	23.9511
capn6	chrX_143820279_143820308	44.3909	94.6121	67.766	144.955	59.5669	0	0	0	0	0	0	0	0	0	0	0	0	0	0	0	138.144	0	109.843	0	0	0	0	0	0	0	0	0	0	0	0	0	0	0	0	0	0	0	0	0	99.1249	23.9511
c6	chr15_4798332_4798361	44.3909	98.7035	74.2668	78.0702	99.8679	0	0	0	0	0	0	0	0	0	0	0	0	0	0	0	123.31	0	0	0	0.494705	0	104.223	0	0	0	0	0	0	0	0	0	0	0	0	0	0	0	0	0	49.5625	23.9511
scn5a	chr9_119517592_119517621	88.7818	401.718	386.896	301.552	218.412	9.32726	50.9907	0	137.408	0	0	0	0	0	0	0	0	0	0	0	334.467	117.228	0	29.8941	0	0.257055	0	0	0	0	0	0	0	0	0	0	0	0	0	0	0	0	226.019	75.5484	49.5625	23.9511
mrap	chr16_90749237_90749266	177.564	97.9363	58.5072	74.8743	60.3532	9.32726	0	0	0	0	0	0	0	0	0	0	0	0	0	0	117.979	0	0	0	0.247353	0	0	0	0	0	0	0	0	0	0	0	0	0	0	0	0	0	0	37.7742	0	0
kras	chr6_145234301_145234330	88.7818	70.8312	93.1782	114.138	102.03	9.32726	0	0	0	0	0	0	0	0	0	0	0	0	0	0	87.6149	0	109.843	0	0	0	0	0	0	0	0	0	0	0	0	0	0	0	0	0	0	0	0	37.7742	0	0
fgf2	chr3_37396193_37396222	44.3909	109.443	151.685	27.3931	0	0	0	0	0	0	0	0	0	0	0	0	0	0.481508	0.588496	0	100.363	0	0	29.8941	0.247353	0	0	0	0	0	0	0	0	0	0	0	0	0	0	0	0	0	0	37.7742	0	23.9511
c4bp	chr1_130636327_130636356	133.173	107.142	137.305	57.2971	75.0975	0	0	0	0	0	0	0	0	0	0	0	0	0	0	0	235.494	351.683	0	89.6822	1226.62	0.514109	52.1114	0.769727	0	0	0	0	0	0	0	0	0	0	0	0	0	0	75.3397	0	0	0
klhl31	chr9_77650373_77650402	88.7818	146.01	102.831	54.5578	37.7453	9.32726	0	0	0	0	0	0	0	0	0	0	0	0	0	0	248.706	0	0	29.8941	1.23676	0.514109	625.337	0	1154.21	0	0	0	0	0	0	0	0	0	0	0	0	0	0	37.7742	0	23.9511
ephb1	chr9_101929330_101929359	88.7818	254.686	293.915	611.55	271.295	0	0	0	0	0	0	0	0	0	0	0	0	0	0	0	232.481	117.228	2636.24	0	0	0	52.1114	0	0	0	0	0	0	0	0	0	0	0	0	0	0	0	75.3397	113.323	49.5625	143.706
saa3	chr7_46712704_46712733	133.173	487.125	449.343	263.886	578.565	0	0	0	68.704	0	0	0	0	0	0	0	0	0.481508	0	0	493.008	0	109.843	0	0.247353	0	156.334	0.256576	0	0	0	0	0	0	0	0	0	0	0	0	0	0	150.679	0	99.1249	23.9511
rasgef1c	chr11_49967364_49967393	88.7818	189.224	141.836	55.6992	295.868	0	0	0	0	0	0	0	0	0	0	0	0	0.481508	0	0	162.945	0	0	29.8941	0	0.257055	0	0.256576	0	0	0	0	0	0	0	0	0	0	0	0	0	0	150.679	37.7742	0	23.9511
gria1	chr11_57189764_57189793	44.3909	107.398	153.458	18.7186	181.256	0	0	0	0	0	0	0	0	0	0	0	0	0.481508	1.17699	0	47.7478	0	0	0	0	0	0	0	0	0	0	0	0	0	0	0	0	0	0	0	0	0	150.679	75.5484	99.1249	0
atp1a2	chr1_172276119_172276148	177.564	222.722	214.724	378.024	178.307	0	0	0	137.408	0	0	0	0	0	0	0	0	0.963017	0.588496	0	161.555	0	439.373	119.576	2.22617	1.02822	156.334	1396.8	0	0	0	0	0	0	0	0	0	0	0	0	0	0	226.019	37.7742	148.687	0
bbox1	chr2_110275542_110275571	88.7818	220.421	194.63	209.785	270.508	0	0	0	0	0	0	0	0	0	0	0	0	0	0	0	346.519	117.228	0	59.7881	0.247353	0	52.1114	0.256576	0	0	0	0	0	0	0	0	0	0	0	0	0	0	75.3397	75.5484	49.5625	0
rb1	chr14_73262660_73262689	44.3909	75.434	86.0864	103.637	0	0	0	0	0	0	0	0	0	0	0	0	0	0	0	0	161.786	0	0	59.7881	0	0	0	0.256576	0	0	0	0	0	0	0	0	0	0	0	0	0	0	226.019	37.7742	49.5625	23.9511
ubr5	chr15_38008008_38008037	44.3909	47.8175	149.125	3.19586	40.301	0	0	0	0	0	0	0	0	0	0	0	0	0	0	0	165.263	0	109.843	0	0	0.257055	52.1114	0	0	0	0	0	0	0	0	0	0	0	0	0	0	0	75.3397	0	0	0
ctsg	chr14_56101080_56101109	44.3909	97.9363	92.1932	36.9806	34.7965	0	50.9907	0	0	0	0	0	0	0	0	0	0	0	0	0	109.866	0	6920.13	29.8941	0	0	0	0	0	0	0	0	0	0	0	0	0	0	0	0	0	0	0	37.7742	0	0
plin1	chr7_79722821_79722850	133.173	478.942	364.439	725.003	402.027	0	0	0	137.408	0	0	0	0	0	0	0	0	0	0	0	386.618	117.228	109.843	59.7881	0	0	52.1114	0	0	0	1.12005	0	0	0	0	0	0	0	0	0	0	0	150.679	75.5484	198.25	119.755
asxl1	chr2_153399406_153399435	88.7818	162.886	102.437	84.4619	250.456	0	0	0	0	0	0	0	0	0	0	0	0	0	0.588496	0	134.436	0	0	0	111.309	0	0	0	0	0	0	0	0	0	0	0	0	0	0	0	0	0	150.679	0	99.1249	0
ptchd3	chr11_121830530_121830559	44.3909	291.763	210.39	345.837	344.426	0	0	0	68.704	0	0	0	0	0	0	0	0	0.481508	0.588496	0	119.138	0	0	89.6822	0	0	0	0	0	0	0	0	0	0	0	0	0	0	0	0	0	0	226.019	113.323	99.1249	23.9511
tet2	chr3_133480313_133480342	44.3909	152.402	117.211	26.9365	196.983	0	0	0	68.704	0	0	0	0	0	0	0	0	0	0.588496	0	147.184	0	109.843	0	0	0	0	0	0	0	0	0	0	0	0	0	0	0	0	0	0	0	0	37.7742	99.1249	47.9021
gfap	chr11_102895465_102895494	44.3909	52.1645	81.5555	43.6006	80.7986	0	0	0	0	0	0	0	0	0	0	0	0	0	0	0	87.1514	0	0	0	0.247353	0	0	0.513151	0	0	0	0	0	0	0	0	0	0	0	0	0	0	75.3397	0	49.5625	23.9511
gpr12	chr5_146583712_146583741	44.3909	301.736	169.809	204.991	19.659	9.32726	0	0	0	0	0	0	0	0	0	0	0	0	0	0	161.555	0	0	0	0	0	104.223	0	0	0	0	0	0	0	0	0	0	0	0	0	0	0	0	37.7742	49.5625	47.9021
pappa2	chr1_158845027_158845056	44.3909	189.991	139.669	114.594	183.812	0	0	0	0	0	0	0	0	0	0	0	0	0	0	0	104.303	0	0	59.7881	0	0	52.1114	0	0	0	0	0	0	0	0	0	0	0	0	0	0	0	150.679	37.7742	99.1249	23.9511
tsc2	chr17_24626289_24626318	44.3909	160.841	135.532	63.6888	101.047	0	0	0	0	0	0	0	0	0	0	0	0	0.481508	0	0	166.886	0	0	0	0.247353	0.514109	0	0	0	0	0	0	0	0	0	0	0	0	0	0	0	0	0	37.7742	49.5625	23.9511
hsd17b13	chr5_103972625_103972654	88.7818	18.1553	68.5539	52.2751	0	0	0	0	0	0	0	0	0	0	0	0	0	0	0	0	84.6017	0	0	0	0	0.257055	52.1114	0	0	0	0	0	0	0	0	0	0	0	0	0	0	0	75.3397	0	0	0
irs4	chrX_141723903_141723932	133.173	200.475	242.303	128.291	151.768	0	0	0	0	0	0	0	0	0	0	0	0	0	0	0	226.686	0	0	0	0.247353	0	52.1114	0	0	0	0	0	0	0	0	0	0	0	0	0	0	0	150.679	75.5484	49.5625	23.9511
gata3	chr2_9874404_9874433	44.3909	111.745	179.068	48.6227	551.239	9.32726	0	0	0	0	0	0	0	0	0	0	0	0	0.588496	0	121.919	0	0	0	0	0	0	0	0	0	0	0	0	0	0	0	0	0	0	0	0	0	75.3397	37.7742	49.5625	95.8043
lhcgr	chr17_88791788_88791817	88.7818	281.024	279.732	489.651	501.109	0	50.9907	0	137.408	0	0	0	0	0	0	0	0	0	0	0	567.875	117.228	219.687	0	0.247353	0	52.1114	0.256576	0	0	0	0	0	0	0	0	0	0	0	0	0	0	301.359	0	49.5625	143.706
gpam	chr19_55079264_55079293	44.3909	72.6212	124.303	75.7874	84.7304	0	0	0	0	0	0	0	0	0	0	0	0	0	0	0	204.667	0	0	0	0	0	0	0	0	0	0	0	0	0	0	0	0	0	0	0	0	0	75.3397	0	0	0
synm	chr7_67759012_67759041	133.173	293.298	274.807	630.497	129.75	9.32726	0	0	0	0	0	0	0	0	0	0	0	0	0	0	374.334	0	0	29.8941	0.247353	0.257055	52.1114	0.256576	0	0	0	0	0	0	0	0	0	0	0	0	0	0	150.679	113.323	0	47.9021
au021092	chr16_5217837_5217866	88.7818	24.0366	68.7509	74.8743	72.935	0	0	0	0	0	0	0	0	0	0	0	0	0	0	0	72.0853	0	109.843	0	0	0	0	0	0	0	0	0	0	0	0	0	0	0	0	0	0	0	0	0	0	0
kmt2a	chr9_44849092_44849121	44.3909	118.137	209.011	98.3867	299.407	9.32726	0	0	0	0	0	0	0	0	0	0	0	0.481508	0	0	238.276	0	0	0	54.4176	0	52.1114	0	0	0	0	0	0	0	0	0	0	0	0	0	0	0	75.3397	0	0	0
lhcgr	chr17_88742901_88742930	44.3909	36.822	60.8712	34.9261	93.577	0	0	0	0	0	0	0	0	0	0	0	0	0	0.588496	0	81.8203	0	0	0	0	0	0	0	0	0	0	0	0	0	0	0	0	0	0	0	0	0	0	0	0	0
hspa5	chr2_34772565_34772594	44.3909	47.0504	253.925	10.0441	38.9249	0	0	0	137.408	0	0	0	0	0	0	0	0	0	0	0	109.403	0	109.843	0	0	0	0	0	0	0	0	0	37.1841	0	0	0	0	0	0	4558.54	0	0	0	37.7742	0	0
notch2	chr3_98135540_98135569	44.3909	161.096	109.135	94.0495	192.462	0	0	0	0	0	0	0	0	0	0	0	0	0.481508	0	0	82.2839	0	0	0	0	0	0	0	0	0	0	0	0	0	0	0	0	0	0	0	0	0	0	0	0	23.9511
plxna4	chr6_32215185_32215214	88.7818	306.594	422.355	305.661	241.806	0	50.9907	0	137.408	0	0	0	0	0	0	0	0	0	0	0	251.951	117.228	0	29.8941	0	0	104.223	0.256576	0	0	0	0	0	0	0	0	0	0	0	0	0	0	75.3397	0	99.1249	47.9021
kcnj16	chr11_111024757_111024786	88.7818	55.4887	115.636	126.008	212.711	0	0	0	0	0	0	0	0	0	0	0	0	0	0	0	93.1778	0	0	29.8941	0	0	0	0	0	0	0	0	0	0	0	0	0	0	0	0	0	0	0	75.5484	49.5625	23.9511
alb	chr5_90469613_90469642	177.564	429.59	290.763	301.324	333.614	9.32726	0	0	0	0	0	0	0	0	0	0	0	0.481508	0	0	370.857	117.228	0	59.7881	168.447	0.257055	52.1114	0	0	0	0	0	37.1841	0	0	0	0	0	109.502	0	0	0	301.359	37.7742	99.1249	0
gipc2	chr3_152165708_152165737	177.564	275.909	291.354	541.013	91.4145	9.32726	0	0	68.704	0	0	0	0	0	0	0	0	0.481508	0	0	293.672	117.228	109.843	119.576	624.071	0.257055	156.334	0.513151	0	0	0	0	0	0	0	0	0	0	0	0	0	0	75.3397	188.871	99.1249	95.8043
ptprc	chr1_138064590_138064619	133.173	29.9179	200.54	0.228275	8.64997	0	0	0	0	0	0	0	0	0	0	0	0	0	0	0	118.906	0	0	29.8941	0	0	0	0	0	0	0	0	0	0	0	0	0	0	0	0	0	0	0	37.7742	0	23.9511
ky	chr9_102537702_102537731	177.564	428.823	365.03	501.749	327.913	0	0	0	68.704	0	0	0	0	0	0	0	0	0.481508	0.588496	0	487.213	117.228	109.843	209.259	0.247353	0.257055	104.223	0	0	0	0	0	0	0	0	0	0	0	0	0	0	0	75.3397	151.097	49.5625	23.9511
stab2	chr10_86947261_86947290	44.3909	113.535	100.467	37.8937	28.7022	0	0	0	0	0	0	0	0	0	0	0	0	0	0.588496	0	57.4828	0	0	0	0	0	0	0	0	0	0	0	0	0	0	0	0	0	0	0	0	0	75.3397	0	0	0
pkhd1l1	chr15_44545477_44545506	221.955	35.5435	60.2802	72.135	19.0693	0	0	0	0	0	0	15854.4	0	6.25128	12.9893	0	72.9928	0	0	0	24.3375	468.911	549.217	149.47	0.742058	2293.18	104.223	0.256576	0	0	0	72.9928	0	0	0	0	0	0	0	5.45933	0	0	0	37.7742	148.687	71.8532
bhmt2	chr13_93663719_93663748	44.3909	162.375	289.581	407.7	294.689	9.32726	50.9907	0	68.704	0	0	0	0	0	0	0	0	0	0.588496	0	321.023	0	0	59.7881	0.247353	0.257055	0	0.256576	0	0	0	0	0	0	0	0	0	0	0	0	0	0	75.3397	37.7742	148.687	23.9511
ube2m	chr7_13036275_13036304	44.3909	500.166	256.683	97.9302	486.954	9.32726	0	0	549.632	2.78572	0	41.943	19041.3	12.5026	6.49467	0	145.986	0.481508	0	0	686.549	117.228	109.843	89.6822	107.104	0	208.446	0.256576	0	0	0	0	0	0	36.2209	5.18838	0	0	0	0	0	0	150.679	0	0	0
wif1	chr10_121082145_121082174	44.3909	193.316	175.719	300.41	129.75	0	0	0	0	0	0	0	0	0	0	0	0	0	0	0	209.998	234.456	109.843	0	35.3714	144.979	0	0	0	0	0	0	0	0	0	0	0	0	0	0	0	0	150.679	37.7742	49.5625	71.8532
ank3	chr10_69899019_69899048	88.7818	162.375	142.23	54.3296	374.308	0	50.9907	0	68.704	0	0	0	0	0	0	0	0	0	0	0	274.666	117.228	0	0	211.239	0	52.1114	0	0	0	0	0	0	0	0	0	0	0	0	0	0	0	150.679	0	148.687	23.9511
brca2	chr5_150567712_150567741	44.3909	140.128	181.826	77.1571	111.27	0	0	0	0	0	0	0	0	0	0	0	0	0	0.588496	0	226.686	0	0	0	0.247353	0.257055	0	0	0	0	0	0	0	0	0	0	0	0	0	0	0	0	75.3397	37.7742	0	23.9511
herc1	chr9_66433295_66433324	44.3909	202.521	258.259	144.042	250.849	9.32726	0	0	68.704	0	0	0	0	0	0	0	0	0	0.588496	0	261.918	117.228	219.687	0	0.494705	0	0	0.256576	0	0	0	0	0	0	0	0	0	0	0	0	0	0	75.3397	75.5484	49.5625	47.9021
ptx3	chr3_66220173_66220202	44.3909	271.307	229.498	146.553	86.1066	0	0	0	0	0	0	0	0	0	0	0	0	0	0	0	247.083	0	0	29.8941	0.247353	0	104.223	0	0	0	1304.86	0	0	0	0	0	0	0	0	0	0	0	150.679	37.7742	49.5625	0
pten	chr19_32815462_32815491	133.173	269.261	176.113	2297.82	189.906	0	0	0	0	0	0	0	0	0	0	0	0	0.481508	0	0	155.76	117.228	0	29.8941	0	0	0	0	0	0	0	0	0	0	0	0	0	0	0	0	0	0	527.378	113.323	148.687	215.56
flt4	chr11_49625239_49625268	44.3909	202.521	167.445	114.823	150.785	0	0	0	0	0	0	0	0	0	0	0	0	0	0	0	215.097	117.228	0	29.8941	0	0	0	0.256576	0	0	0	0	0	0	0	0	0	0	0	0	0	0	75.3397	0	0	47.9021
nf1	chr11_79447558_79447587	44.3909	235.763	130.213	35.8392	322.801	0	0	0	0	0	0	0	0	0	0	0	0	0.481508	0.588496	0	296.222	117.228	0	0	0.247353	0	52.1114	0	0	0	0	0	0	0	0	0	0	0	0	0	0	0	75.3397	0	99.1249	0
chst9	chr18_15453137_15453166	44.3909	254.43	207.041	246.309	320.835	9.32726	0	0	0	0	0	0	0	0	0	0	0	0.481508	0	0	370.857	117.228	0	29.8941	0	0	104.223	0	48.0922	0	0	0	0	0	0	0	0	0	0	0	0	0	0	0	49.5625	71.8532
mrgprb4	chr7_48198857_48198886	44.3909	90.2651	80.9646	137.194	114.416	0	0	0	0	0	0	0	0	0	0	0	0	0	0	0	96.191	0	0	0	22.2617	28.276	0	0	0	0	0	0	0	0	0	0	0	0	0	0	0	0	150.679	0	0	23.9511
nwd2	chr5_63800552_63800581	44.3909	192.293	134.153	146.781	279.158	0	0	0	0	0	0	0	0	0	0	0	0	0.963017	2.35398	0	257.514	0	219.687	0	0	0	52.1114	0.513151	0	0	0	0	0	0	0	0	0	0	0	0	0	0	150.679	75.5484	49.5625	23.9511
trpm6	chr19_18813399_18813428	44.3909	228.092	167.445	80.1247	138.006	0	0	0	0	0	0	0	0	0	0	0	0	0	0	0	197.713	117.228	219.687	59.7881	0	299.983	0	0.513151	0	0	0	0	0	0	0	0	0	0	0	0	0	0	0	0	49.5625	0
kmt2d	chr15_98863561_98863590	44.3909	247.781	288.005	60.9495	252.029	0	0	0	0	0	0	0	0	0	0	0	0	0	0	0	242.911	0	0	29.8941	0	0	0	0	0	0	0	0	0	0	0	0	0	0	0	0	0	0	150.679	37.7742	99.1249	23.9511
ephb1	chr9_101995901_101995930	44.3909	254.686	239.545	97.7019	112.253	0	0	0	0	0	0	0	0	0	0	0	0	0	0	0	239.666	0	0	0	0	0	104.223	0	0	0	0	0	0	0	0	0	0	0	0	0	0	0	0	75.5484	49.5625	23.9511
osr1	chr12_9579664_9579693	44.3909	182.064	95.3451	92.6798	62.3191	0	0	0	0	0	0	0	0	0	0	0	0	0	0.588496	0	131.422	0	0	0	0	0	156.334	68.5057	0	0	0	0	0	0	0	0	0	0	0	0	0	0	75.3397	0	0	0
tufm	chr7_126488249_126488278	88.7818	136.548	174.734	36.0675	96.7224	9.32726	0	0	0	0	0	0	0	0	0	0	0	0	0	0	135.363	0	0	0	0.494705	0	0	0	0	0	0	0	0	0	0	0	0	0	0	0	0	0	0	0	0	0
dnah5	chr15_28343645_28343674	44.3909	127.854	121.939	243.798	128.177	0	0	0	0	0	0	0	0	0	0	0	0	0	0	0	146.488	0	0	0	0	0	104.223	0	0	0	0	0	0	0	0	0	0	0	0	0	0	0	75.3397	0	0	23.9511
spdef	chr17_27720018_27720047	44.3909	270.54	174.537	117.105	137.023	9.32726	0	0	0	0	0	0	0	0	0	0	0	0.481508	0.588496	0	358.109	0	109.843	59.7881	0	0.257055	0	0.256576	0	0	0	0	0	0	0	0	0	0	0	0	0	0	0	37.7742	0	0
fam135b	chr15_71456974_71457003	44.3909	192.037	163.899	177.37	87.0895	9.32726	50.9907	0	0	0	0	0	0	0	0	0	0	0	0	0	156.687	0	0	29.8941	0	0	0	0	0	0	0	0	0	0	0	0	0	0	0	0	0	0	0	75.5484	0	0
adh4	chr3_138424132_138424161	177.564	251.106	274.413	108.659	159.435	0	0	0	0	0	0	0	0	0	0	0	0	0	0	0	261.918	0	109.843	29.8941	0	76.8593	52.1114	0	0	0	0	0	0	0	0	0	0	0	0	0	0	0	226.019	75.5484	49.5625	0
fxyd1	chr7_31053880_31053909	44.3909	256.22	157.004	261.832	213.104	0	0	0	0	0	0	0	0	0	0	0	0	0.481508	0	0	136.29	0	0	0	1.23676	0	52.1114	0	0	0	0	0	0	0	0	0	0	0	0	0	0	0	0	37.7742	0	47.9021
fgf10	chr13_118715503_118715532	88.7818	304.549	271.261	542.154	86.4997	0	0	0	137.408	0	0	0	0	0	0	0	0	0	0	0	318.242	117.228	219.687	0	21.025	0	52.1114	0	0	0	1.12005	72.9928	0	0	0	0	0	0	0	0	0	0	75.3397	75.5484	99.1249	95.8043
dsg1c	chr18_20279322_20279351	88.7818	222.466	164.884	151.118	88.8588	9.32726	0	0	68.704	0	0	0	0	0	0	0	0	0.481508	0	0	192.614	351.683	219.687	0	807.606	0.514109	52.1114	0	0	0	0	0	0	0	0	0	0	0	0	0	0	0	0	0	0	0
gria1	chr11_57238056_57238085	44.3909	186.411	138.881	55.4709	108.518	0	0	0	0	0	0	0	0	0	0	0	0	0	0	0	107.548	0	0	0	565.201	0	0	0	0	0	0	0	0	0	0	0	0	0	0	0	0	0	0	0	49.5625	0
mrgpra1	chr7_47335352_47335381	44.3909	117.626	110.514	16.2076	204.257	9.32726	0	0	206.112	0	0	0	0	0	0	0	0	0.481508	0	0	120.065	0	0	0	0	0.257055	0	0	0	0	0	0	0	0	0	0	0	0	0	0	0	0	0	37.7742	0	23.9511
glra4	chrX_136774656_136774685	44.3909	88.7308	92.3902	125.551	132.502	0	50.9907	0	137.408	0	0	0	0	0	0	0	0	0.481508	0	0	131.191	0	109.843	0	20.5303	0	52.1114	0.513151	0	0	0	0	0	0	0	0	0	0	0	0	0	0	0	0	0	23.9511
fam107a	chr14_8298763_8298792	88.7818	347.508	192.266	127.606	124.442	0	0	0	68.704	0	0	0	0	0	0	0	0	0	0	0	237.58	0	0	59.7881	0	0	0	0	0	0	0	0	0	0	0	0	0	0	0	0	0	0	0	37.7742	49.5625	0
ano3	chr2_110658241_110658270	44.3909	253.407	188.326	189.469	272.867	0	0	0	68.704	0	0	0	0	0	0	0	0	0	0	0	304.798	0	109.843	59.7881	0.494705	0.257055	104.223	0	0	0	0	0	0	0	0	0	0	0	0	0	0	0	0	37.7742	99.1249	47.9021
trp53	chr11_69587371_69587400	44.3909	229.115	190.296	185.588	154.52	0	50.9907	0	0	0	0	0	0	0	0	0	0	0	0	0	252.414	234.456	109.843	88905	0.494705	0.257055	5628.03	0.256576	6973.37	0	0	0	0	0	0	0	0	0	0	0	0	86.6767	0	75.5484	49.5625	71.8532
fat2	chr11_55281994_55282023	44.3909	204.822	147.155	91.0819	128.963	0	0	0	0	0	0	0	0	0	0	0	0	0	0	0	196.554	0	0	0	0	0	0	0.256576	0	0	0	0	0	0	0	0	0	0	0	0	0	0	0	37.7742	0	0
hlf	chr11_90387923_90387952	44.3909	230.393	282.49	157.054	364.282	0	0	0	0	0	0	0	0	0	0	0	0	0.481508	0	0	403.307	117.228	0	0	0	0	52.1114	0	0	0	0	0	0	0	0	0	0	0	0	0	0	0	226.019	0	247.812	71.8532
col17a1	chr19_47654197_47654226	88.7818	218.375	186.553	216.177	446.26	0	0	0	68.704	0	0	0	0	0	0	0	0	0.963017	0.588496	0	299.003	117.228	109.843	0	59.3646	0.257055	0	0.769727	0	0	0	0	0	0	0	0	0	0	0	0	0	0	75.3397	37.7742	99.1249	95.8043
oxtr	chr6_112489247_112489276	44.3909	138.85	115.439	191.523	167.102	0	0	0	0	0	0	0	0	0	0	0	0	0	0	0	254.269	0	0	0	0.247353	0	0	0	0	0	0	0	0	0	0	0	0	0	0	0	0	0	150.679	75.5484	49.5625	0
slc13a2	chr11_78406890_78406919	88.7818	201.498	240.727	160.706	206.616	9.32726	0	0	0	0	0	0	0	0	0	0	0	0	0	0	356.718	0	0	29.8941	0.247353	0.257055	52.1114	0	0	0	0	0	0	0	0	0	0	0	0	0	0	0	75.3397	37.7742	0	47.9021
erbb4	chr1_68040363_68040392	133.173	636.97	533.657	469.334	527.059	0	50.9907	0	68.704	0	0	0	0	0	0	0	0	0	0.588496	0	323.109	234.456	219.687	0	11.1309	0	52.1114	0.256576	0	0	0	0	0	0	0	0	0	0	0	0	0	0	75.3397	113.323	49.5625	167.657
map3k1	chr13_111758094_111758123	88.7818	123.763	189.311	66.8847	178.897	9.32726	0	0	0	0	0	0	0	0	0	0	0	0	0	0	133.277	0	0	0	0	0	0	0.256576	0	0	0	0	0	0	0	0	0	0	0	0	0	0	75.3397	37.7742	99.1249	23.9511
sfrp1	chr8_23411977_23412006	44.3909	156.749	216.89	47.253	44.626	0	0	0	68.704	0	0	0	0	0	0	0	0	0.481508	0	0	489.995	0	0	59.7881	0.494705	0.257055	52.1114	0.513151	0	0	0	0	0	0	0	0	0	0	0	0	0	0	0	37.7742	99.1249	23.9511
prex2	chr1_11160193_11160222	44.3909	148.822	89.6323	98.8433	89.0554	9.32726	0	0	0	0	0	0	0	0	0	0	0	0	0.588496	0	149.038	0	0	29.8941	0	0.257055	156.334	0.513151	0	0	0	0	0	0	0	0	0	0	0	0	0	0	0	0	0	0
tnxb	chr17_34672075_34672104	44.3909	286.905	378.623	276.442	217.429	0	0	0	137.408	0	0	0	0	0	0	0	0	0.481508	1.17699	0	285.56	0	0	119.576	0	0.257055	52.1114	0	0	0	0	0	0	0	0	0	0	0	0	0	0	0	75.3397	0	49.5625	95.8043
hspb6	chr7_30554354_30554383	177.564	264.403	220.633	400.167	72.1486	0	50.9907	0	0	0	0	0	0	0	0	0	0	0	0	0	290.891	0	109.843	29.8941	0	0	0	0.256576	0	0	0	0	0	0	0	0	0	0	0	0	0	0	301.359	0	0	0
scn7a	chr2_66675867_66675896	88.7818	84.3838	75.6457	50.6771	0	0	0	0	0	0	0	0	0	0	0	0	0	0	0	0	71.8535	0	0	0	0	0	0	0	0	0	0	0	0	0	0	0	0	0	0	0	0	0	0	37.7742	0	0
drd2	chr9_49402088_49402117	88.7818	152.914	113.863	71.4502	111.27	0	0	0	68.704	0	0	0	0	0	0	0	0	0	0	0	107.548	0	0	29.8941	0	0	0	0	0	0	0	0	0	0	0	0	0	0	0	0	0	0	0	75.5484	0	23.9511
brca2	chr5_150536752_150536781	44.3909	153.425	164.293	53.6447	59.1737	0	0	0	68.704	0	0	0	0	0	0	0	0	0	0	0	177.548	0	0	29.8941	94.4887	0.257055	52.1114	0	0	0	0	0	0	0	0	0	0	0	0	0	0	0	75.3397	0	49.5625	0
fgfbp1	chr5_43979270_43979299	133.173	248.293	141.048	180.794	141.545	0	0	0	206.112	0	0	0	0	0	0	0	0	0	0.588496	0	234.567	0	109.843	29.8941	0	0.257055	0	0.256576	0	0	0	0	0	0	0	0	0	0	0	0	0	0	0	151.097	49.5625	0
pkd1l2	chr8_117038074_117038103	44.3909	89.7537	181.629	92.6798	59.1737	0	50.9907	0	68.704	0	0	0	0	0	0	0	0	0	0.588496	0	153.442	117.228	0	0	31.1664	0	0	0	0	0	0	0	0	0	0	0	0	0	0	0	0	0	0	37.7742	0	95.8043
bmx	chrX_164234935_164234964	44.3909	37.3334	49.2485	30.1324	70.1827	0	0	0	0	0	0	0	0	0	0	0	0	0.481508	0	0	75.5621	0	0	0	0	0	104.223	0	0	0	0	0	0	0	0	0	0	0	0	0	0	0	0	37.7742	0	0
edn3	chr2_174761000_174761029	133.173	415.015	427.871	537.817	959.754	0	101.981	0	68.704	0	0	0	0	0	0	0	0	0.481508	0	0	468.439	117.228	219.687	59.7881	64.3117	0	52.1114	0.513151	0	0	0	0	0	0	0	0	0	0	0	0	0	0	376.698	75.5484	99.1249	119.755
mrgprb2	chr7_48552811_48552840	44.3909	191.27	124.697	139.705	19.2659	0	0	0	0	0	0	0	0	0	0	0	0	0	0.588496	0	201.653	0	0	59.7881	0	0	0	0	0	0	0	0	0	0	13401.7	0	0	0	109.502	0	0	0	0	0	49.5625	0
lmod1	chr1_135364113_135364142	44.3909	119.927	99.285	232.384	22.4113	18.6545	0	0	0	0	0	0	0	0	0	0	0	0	0	0	101.754	0	0	0	0.247353	0.257055	0	0	0	0	0	0	0	0	0	0	0	0	0	0	0	0	226.019	37.7742	49.5625	0
abca6	chr11_110241555_110241584	44.3909	87.9637	59.0982	48.1661	85.5168	0	0	0	0	0	0	0	0	0	0	0	0	0	0	0	116.125	0	0	29.8941	0	0	0	0	0	0	0	0	0	0	0	0	0	0	0	0	0	0	0	0	49.5625	0
cd36	chr5_17811189_17811218	44.3909	72.3655	84.7075	66.8847	53.0794	0	0	0	0	0	0	0	4973.72	0	0	0	0	0	0	0	135.363	0	0	0	0	0.257055	0	0.256576	96.1845	0	0	0	0	0	0	0	0	0	0	0	0	0	75.3397	0	0	23.9511
pde4dip	chr3_97766523_97766552	44.3909	227.836	203.298	259.777	50.3271	0	0	0	68.704	0	0	0	0	0	0	0	0	0	0.588496	0	114.038	0	0	29.8941	0	0	0	0	0	0	0	0	0	0	0	0	0	0	0	0	0	0	0	75.5484	0	23.9511
jak1	chr4_101189109_101189138	88.7818	271.818	216.693	554.253	1258.96	0	0	0	68.704	0	0	0	0	0	0	0	0	0	0.588496	0	444.796	0	109.843	29.8941	0	0	52.1114	0.769727	0	0	0	0	0	0	0	0	0	0	0	0	0	0	150.679	113.323	99.1249	47.9021
ano3	chr2_110884843_110884872	133.173	158.284	178.674	315.248	119.92	0	0	0	0	0	0	0	0	0	0	0	0	0	0	0.738142	198.177	0	0	0	0.247353	0	0	0	0	0	0	0	0	0	0	0	22351	0	0	0	0	0	0	37.7742	49.5625	23.9511
fat4	chr3_38979671_38979700	44.3909	84.8952	96.9211	211.611	284.27	0	0	0	0	0	0	0	0	0	0	0	0	0	0	0	91.7871	0	0	0	0	0	52.1114	0	0	0	0	0	0	0	0	0	0	0	0	0	0	0	75.3397	37.7742	49.5625	23.9511
sstr1	chr12_58213612_58213641	44.3909	120.183	139.275	65.0585	42.6601	0	0	0	0	0	0	0	0	0	0	0	0	0	0.588496	0	139.535	117.228	0	29.8941	0	0.257055	0	24.6313	0	0	0	0	0	0	0	0	0	0	0	0	0	0	0	0	0	0
wdr82	chr9_106180611_106180640	88.7818	89.498	205.268	19.1751	45.609	0	0	0	0	0	0	20020.8	4.10373	6.25128	6.49467	0	0	0	0	0	146.257	117.228	109.843	0	27.4561	0	0	0	0	0	2.2401	0	111.552	34.4873	0	0	0	0	109.502	16.378	42.3029	0	0	0	99.1249	23.9511
gpam	chr19_55077891_55077920	44.3909	217.352	224.967	252.701	147.246	0	0	0	68.704	0	0	0	0	0	0	0	0	0	0.588496	0	332.38	234.456	0	29.8941	11.1309	0.257055	104.223	0	0	0	0	0	0	0	0	0	0	0	0	0	0	0	0	0	99.1249	23.9511
pigr	chr1_130844882_130844911	44.3909	170.813	170.991	54.1013	38.1385	0	0	0	0	0	0	0	0	0	0	0	0	0	0	0	242.448	0	109.843	0	0	0	52.1114	0.256576	0	0	0	0	0	0	0	0	0	0	0	0	0	0	0	0	0	0
birc6	chr17_74623846_74623875	44.3909	171.836	256.092	99.5281	99.8679	0	0	0	0	0	0	0	0	0	0	0	0	0	0.588496	0	120.065	0	329.53	29.8941	0	0	104.223	0	0	0	0	0	0	0	0	0	0	0	0	0	0	0	75.3397	37.7742	49.5625	23.9511
gpam	chr19_55081418_55081447	44.3909	239.343	153.458	89.7123	161.99	9.32726	0	0	68.704	0	0	0	0	0	0	0	0	0.963017	0.588496	0	126.323	0	0	0	0	0	52.1114	0.256576	0	0	0	0	0	0	0	0	0	0	0	0	0	0	75.3397	37.7742	49.5625	0
egfr	chr11_16889968_16889997	133.173	120.694	76.4337	109.116	169.854	18.6545	0	0	0	0	0	0	0	0	0	0	0	0.481508	0	0	108.476	117.228	549.217	59.7881	1376.76	0.771164	156.334	0.256576	0	0	0	0	0	0	0	0	0	0	0	0	0	0	75.3397	0	0	0
pik3r1	chr13_101685006_101685035	88.7818	378.96	222.997	334.424	571.291	0	50.9907	0	68.704	0	0	0	0	0	0	0	0	0	0	0	229.931	0	0	59.7881	0	0	0	0.256576	0	0	0	0	0	0	0	0	0	0	0	0	0	0	0	0	99.1249	0
tgfbr3	chr5_107214908_107214937	88.7818	208.147	223.194	16.8924	31.0613	0	50.9907	0	0	0	0	0	0	0	0	0	0	0.481508	0	0	248.938	0	0	0	0	0	0	0.256576	0	0	2.2401	145.986	0	0	0	0	0	0	0	0	0	0	75.3397	0	0	0
smad4	chr18_73662698_73662727	133.173	221.444	235.605	726.601	1257.2	0	0	0	0	0	0	0	0	0	0	0	0	0	0	0	290.891	0	109.843	0	0.247353	0	52.1114	0	0	0	0	0	0	0	0	0	0	0	0	0	0	0	0	151.097	297.375	143.706
ep300	chr15_81632470_81632499	88.7818	157.005	202.904	34.4696	46.0021	0	0	0	68.704	0	0	0	0	0	0	0	0	0	0	0	166.19	0	8018.56	29.8941	0	0.257055	0	0	0	0	0	0	0	0	0	0	0	0	0	0	0	0	75.3397	37.7742	0	71.8532
rbp4	chr19_38118426_38118455	133.173	129.388	188.72	194.947	182.632	0	0	0	0	0	0	0	0	0	0	0	0	0	0	0	195.163	0	0	29.8941	20.0356	0	0	0	0	0	0	0	0	0	0	0	0	0	0	0	0	0	75.3397	37.7742	0	0
lipe	chr7_25388531_25388560	44.3909	142.174	180.841	25.5668	172.017	0	50.9907	0	0	0	0	0	0	0	0	0	0	0	0	0	119.833	117.228	0	29.8941	0	0	0	0	0	0	0	0	0	0	0	0	0	0	0	0	0	0	0	37.7742	0	0
muc6	chr7_141651950_141651979	44.3909	216.841	277.368	332.597	171.23	0	0	0	0	0	0	0	0	0	0	0	0	0.963017	0	0	271.189	0	109.843	0	0	0.257055	0	0	0	0	0	0	0	0	0	0	0	0	0	0	0	0	75.3397	0	198.25	0
elf5	chr2_103430349_103430378	44.3909	171.58	165.278	71.4502	294.885	9.32726	0	0	0	0	0	0	0	0	0	0	0	0	0	0	225.991	0	0	29.8941	0	0.257055	52.1114	0	0	0	0	0	0	0	0	0	0	0	0	0	0	0	0	0	148.687	0
ky	chr9_102527968_102527997	44.3909	147.032	156.807	147.466	0	0	0	0	68.704	0	0	0	0	0	0	0	0	0.963017	0	0	186.819	234.456	0	29.8941	0	0.257055	104.223	0	0	0	0	0	0	0	0	0	0	0	0	0	0	0	0	0	49.5625	95.8043
1700019d03rik	chr1_52925485_52925514	88.7818	356.202	280.914	273.931	178.701	9.32726	0	0	0	0	0	0	0	0	0	0	0	0	0	0	277.679	0	0	0	92.7572	0	104.223	0.256576	1154.21	0	0	0	0	0	0	0	0	0	0	0	0	0	0	37.7742	99.1249	47.9021
oca2	chr7_56280776_56280805	44.3909	69.297	88.0564	28.3062	54.4555	0	0	0	0	0	0	0	0	0	0	0	0	0	0	0	42.8803	0	0	0	0	0	0	0	0	0	0	0	0	0	0	0	0	0	0	0	0	0	0	0	0	0
tat	chr8_109991929_109991958	88.7818	227.836	182.417	423.908	38.9249	9.32726	0	0	0	0	0	0	0	0	0	0	0	0	0	0	272.58	0	109.843	0	14.8412	0.257055	312.668	0	0	0	0	0	0	0	0	0	0	0	0	0	0	0	75.3397	37.7742	49.5625	47.9021
hhatl	chr9_121788767_121788796	44.3909	264.147	215.315	151.803	87.0895	0	0	0	137.408	0	0	0	0	0	0	0	0	0.481508	0.588496	0	314.301	117.228	0	59.7881	0	0	52.1114	0	0	0	0	0	0	0	0	0	0	0	0	0	0	0	0	37.7742	49.5625	23.9511
glyat	chr19_12646349_12646378	44.3909	243.69	189.705	210.47	71.5589	0	0	0	0	0	0	0	0	0	0	0	0	0.481508	0	0	294.136	234.456	0	29.8941	9.64675	0	0	0	0	0	0	0	0	0	0	0	0	0	0	0	0	0	0	0	99.1249	47.9021
adamts7	chr9_90185741_90185770	88.7818	166.21	189.902	31.2737	551.632	0	0	0	0	0	0	0	0	0	0	0	0	0	0	0	402.38	0	0	29.8941	0.247353	0	104.223	0	0	0	0	0	0	0	0	0	0	0	0	0	0	0	0	75.5484	0	119.755
rara	chr11_98970215_98970244	44.3909	327.051	236.984	320.499	299.21	0	101.981	0	0	0	0	0	0	0	0	0	0	0.481508	0.588496	0	259.832	0	0	89.6822	0.247353	0	0	0	0	0	0	0	0	0	0	0	0	0	0	0	0	0	301.359	0	247.812	47.9021
atp1a2	chr1_172291202_172291231	44.3909	321.426	232.847	209.557	175.162	9.32726	0	0	0	0	0	0	0	0	0	0	0	0.963017	0.588496	0	238.507	0	0	29.8941	0	0	0	0	0	0	0	0	0	0	0	0	0	0	0	0	0	0	75.3397	75.5484	49.5625	71.8532
hoxa2	chr6_52163340_52163369	44.3909	19.9453	12.2136	0	99.2781	0	0	0	0	0	0	0	0	0	0	0	0	0	0	0	24.5693	0	0	0	0	0	0	0	0	0	0	0	0	0	0	0	0	0	0	0	0	0	0	0	0	0
vps13c	chr9_67937779_67937808	177.564	316.823	284.459	677.065	336.956	18.6545	0	0	0	0	0	0	0	0	0	0	0	0	0	0	152.515	117.228	0	89.6822	0	734.148	260.557	0.256576	0	0	0	0	0	0	0	0	0	0	0	0	0	0	0	113.323	99.1249	95.8043
stab2	chr10_86890757_86890786	44.3909	581.737	498.198	523.892	296.065	0	0	0	68.704	0	0	15253.3	12.3112	6.25128	0	0	0	0.481508	0	0	566.716	234.456	109.843	29.8941	0	0	0	31.3022	0	0	0	145.986	0	34.4873	36.2209	0	0	0	0	0	0	0	150.679	37.7742	49.5625	119.755
ccl28	chr13_119645877_119645906	44.3909	273.352	240.333	193.806	131.716	0	101.981	0	137.408	0	0	0	0	0	0	0	0	0	0	0	293.44	0	0	29.8941	0	0	0	0	0	0	0	0	0	0	0	0	0	0	0	0	0	0	150.679	75.5484	0	47.9021
car4	chr11_84964110_84964139	44.3909	379.216	185.371	182.392	0	0	0	0	0	0	0	0	0	0	0	0	0	0	0	0	252.414	0	0	0	0	0	208.446	0	0	0	0	0	0	0	0	0	0	0	0	0	0	0	150.679	37.7742	99.1249	15280.8
mrgpra9	chr7_47235537_47235566	88.7818	255.708	177.886	288.768	152.161	0	0	0	68.704	0	0	0	0	0	0	0	0	0	0	0	169.203	117.228	0	59.7881	285.198	0	52.1114	0.256576	0	0	0	0	0	0	0	0	0	0	0	0	0	0	75.3397	0	198.25	23.9511
ryr1	chr7_29087227_29087256	88.7818	233.462	231.862	233.298	170.837	9.32726	0	0	137.408	0	0	0	0	0	0	0	0	0	0	0	275.129	0	0	0	0	0	0	0	0	0	0	0	0	0	0	0	0	0	0	0	0	0	0	37.7742	49.5625	23.9511
myom1	chr17_71077360_71077389	88.7818	237.297	167.248	429.614	221.95	0	0	0	0	0	0	0	0	0	0	0	0	0.481508	0	0	203.971	117.228	0	0	0	0	0	29.5062	0	0	0	0	0	0	0	0	0	0	0	0	0	0	0	0	148.687	47.9021
ntf5	chr7_45415565_45415594	44.3909	168.768	229.104	155.227	234.925	0	0	0	0	0	0	0	0	0	0	0	0	0.481508	0	0	164.336	117.228	0	29.8941	0.989411	0	52.1114	243.49	0	0	0	0	0	0	0	0	0	0	0	0	0	0	75.3397	75.5484	148.687	71.8532
col25a1	chr3_130549165_130549194	88.7818	368.476	217.284	47.7096	36.959	9.32726	0	0	0	0	0	0	0	0	0	0	0	0	0	0	361.354	117.228	0	0	0.494705	0	0	0.256576	0	0	0	0	0	0	0	0	0	0	0	0	0	0	75.3397	37.7742	0	23.9511
nwd2	chr5_63805708_63805737	44.3909	79.781	60.8712	18.4903	8.64997	9.32726	0	0	0	0	0	0	0	0	0	0	0	0	0.588496	0	118.211	0	0	29.8941	0	0	52.1114	0	0	0	0	0	0	0	0	0	0	0	0	0	0	0	0	37.7742	0	0
atm	chr9_53492243_53492272	44.3909	109.443	118.984	48.1661	164.546	0	0	0	0	0	0	0	0	0	0	0	0	0	0	0	89.0056	0	0	0	0.247353	0	0	0	0	0	0	0	0	0	0	0	0	0	0	0	0	0	0	0	49.5625	47.9021
scn4a	chr11_106324564_106324593	44.3909	325.261	219.254	167.326	156.682	9.32726	0	0	0	0	0	0	0	0	0	0	0	0	0	0	133.508	0	0	29.8941	0	0	0	0	0	0	0	0	0	0	0	0	0	0	0	0	0	0	75.3397	37.7742	49.5625	0
plin4	chr17_56106998_56107027	44.3909	276.421	298.249	239.689	289.381	0	0	0	0	0	0	0	0	0	0	37609	0	0	0	0	355.327	117.228	109.843	0	0	0	0	0	0	0	0	0	0	0	0	0	0	0	0	0	0	0	75.3397	113.323	49.5625	47.9021
g0s2	chr1_193272595_193272624	88.7818	315.544	263.381	801.019	140.759	0	0	0	68.704	0	0	0	0	0	0	0	0	0	0	0	408.174	234.456	0	0	0	0	52.1114	22.8352	0	0	0	0	0	0	0	0	0	0	0	0	0	0	226.019	75.5484	49.5625	47.9021
tmem100	chr11_90035515_90035544	88.7818	274.375	265.745	262.288	416.182	0	0	0	0	0	0	0	0	0	0	0	0	0	1.76549	0	224.368	0	0	0	0	0.257055	104.223	0.513151	0	0	0	72.9928	0	0	0	0	0	0	0	0	0	0	0	37.7742	148.687	47.9021
hnrnpk	chr13_58394535_58394564	88.7818	61.37	345.528	57.0689	79.8157	0	0	0	68.704	0	0	0	0	0	0	0	0	0	0.588496	0	142.316	234.456	109.843	89.6822	1.73147	0.257055	52.1114	432.073	0	0	0	0	0	0	0	0	0	0	0	0	0	0	150.679	75.5484	0	23.9511
atp2b3	chrX_73529630_73529659	133.173	178.74	144.594	159.565	156.682	0	0	0	0	0	0	0	0	0	0	0	0	0	0.588496	0	167.117	0	0	59.7881	0.247353	0	0	0	0	0	0	0	0	0	0	0	0	0	0	0	0	0	0	37.7742	0	23.9511
mybpc1	chr10_88553278_88553307	44.3909	278.722	200.737	115.736	231.977	0	0	0	0	0	0	0	0	0	0	0	0	0	0	0	262.845	234.456	109.843	89.6822	0.494705	0.257055	0	0	0	0	0	0	0	0	0	0	0	0	0	0	0	0	75.3397	113.323	49.5625	23.9511
ccl28	chr13_119645882_119645911	88.7818	421.919	368.576	245.624	694.16	0	0	0	68.704	0	0	0	0	0	0	0	0	0	0	0	416.75	117.228	109.843	0	2.22617	0.257055	260.557	0.256576	0	0	0	0	0	0	0	0	0	0	0	0	0	0	376.698	75.5484	148.687	23.9511
ccl21b	chr4_42255972_42256001	44.3909	110.21	197.782	129.432	193.248	0	0	0	0	0	0	0	0	0	0	0	0	0	0	0	182.183	0	109.843	29.8941	0	0.257055	0	0	0	0	0	0	0	0	0	0	0	0	0	0	0	0	75.3397	0	0	0
adh1	chr3_138280391_138280420	177.564	1273.17	947.542	950.767	850.843	18.6545	50.9907	0	274.816	0	0	0	0	0	0	0	0	0	0.588496	0	1629.92	351.683	329.53	179.364	22.2617	0.257055	208.446	1.0263	0	0	0	0	0	0	0	0	0	0	0	0	0	0	150.679	302.194	99.1249	167.657
syne1	chr10_5367520_5367549	44.3909	209.937	159.171	165.271	192.855	0	50.9907	0	0	0	0	0	0	0	0	0	0	0	0	0	168.276	0	0	0	0	0.257055	0	0	0	0	0	0	0	0	0	0	0	0	0	0	0	0	75.3397	0	49.5625	47.9021
notch2	chr3_98099455_98099484	44.3909	155.215	237.575	83.5488	259.106	0	0	0	0	0	0	0	0	0	0	0	0	0	0	0	213.938	117.228	0	0	0	0	52.1114	0	0	0	0	0	0	0	0	0	0	0	0	0	0	0	0	75.5484	0	71.8532
brca1	chr11_101525775_101525804	44.3909	45.0047	125.485	46.5682	58.5839	0	0	0	68.704	0	0	0	0	0	0	0	0	0	0	0	83.4428	0	109.843	0	0	0	0	0	0	0	0	0	0	17.2436	0	0	0	0	0	0	0	0	0	0	49.5625	23.9511
angpt4	chr2_151934454_151934483	88.7818	275.142	261.017	805.127	136.434	0	0	0	0	0	0	0	0	0	0	0	0	0	0	0	252.414	0	0	29.8941	0	157.317	104.223	0.256576	0	0	0	0	0	0	0	0	0	0	0	0	0	0	0	151.097	198.25	47.9021
c1qtnf7	chr5_43609213_43609242	44.3909	309.663	268.7	303.15	514.477	0	0	3.4318	0	0	0	0	0	0	0	0	0	0	0	2.21442	359.268	351.683	0	448.411	5.44176	1.28527	573.226	6.41439	8560.42	0	2.2401	218.978	0	0	0	5.18838	35.3375	0	0	0	0	112.021	75.3397	0	99.1249	23.9511
cldn19	chr4_119259730_119259759	88.7818	445.444	425.507	700.349	488.724	9.32726	0	0	68.704	0	0	0	0	0	0	0	0	0	0	0	141.621	0	0	0	6.18382	0	104.223	0	0	0	0	0	0	0	0	0	0	0	0	0	0	0	301.359	113.323	198.25	47.9021
hoxa5	chr6_52204174_52204203	44.3909	251.106	221.618	91.0819	209.172	0	101.981	0	137.408	0.928573	47.4468	0	19082.3	6.25128	6.49467	46.0895	0	0.481508	0	0	303.639	2930.69	109.843	29.8941	0	0	3856.24	32.3285	480.922	0	0	0	0	0	0	0	0	0	0	0	0	0	75.3397	37.7742	49.5625	23.9511
clca4a	chr3_144961907_144961936	88.7818	224.768	145.185	154.999	194.035	9.32726	101.981	0	0	0	0	0	0	0	0	0	0	0.481508	0.588496	0	225.759	0	109.843	29.8941	0	0	208.446	0	0	0	0	0	0	0	0	0	0	0	0	0	0	0	150.679	37.7742	49.5625	0
scara5	chr14_65743330_65743359	44.3909	242.667	194.236	111.17	216.643	9.32726	0	0	68.704	0	0	0	0	0	0	0	0	0	0	0	113.575	0	0	0	0	0	0	0	0	0	0	0	0	0	0	0	0	0	0	0	0	0	75.3397	0	49.5625	119.755
angptl1	chr1_156844704_156844733	44.3909	269.261	297.264	350.175	363.102	0	50.9907	0	0	0	0	0	0	0	0	0	0	0	0	0	396.121	234.456	0	29.8941	0.494705	0.257055	52.1114	0	0	0	0	0	0	0	0	0	0	0	0	0	0	0	75.3397	0	99.1249	47.9021
nup98	chr7_102153877_102153906	44.3909	43.9819	143.018	0	394.753	0	0	0	0	0	0	0	0	0	0	0	0	0	0	0	39.8671	2461.78	0	0	0.247353	0	0	0	0	0	0	0	0	0	0	0	0	0	0	0	0	0	150.679	37.7742	49.5625	95.8043
hs3st4	chr7_123983472_123983501	88.7818	316.567	424.522	297.671	375.684	0	0	0	137.408	0	0	0	0	0	0	0	0	0	0	0	556.981	117.228	109.843	29.8941	0.247353	0	52.1114	0.256576	0	0	0	0	0	0	0	0	0	0	0	0	0	0	75.3397	37.7742	99.1249	95.8043
dnase1l3	chr14_7977126_7977155	44.3909	219.654	230.483	70.7654	417.361	9.32726	0	0	68.704	0	0	0	0	0	0	0	0	0	0	2.21442	214.402	234.456	0	0	0.247353	0	52.1114	0	0	0	0	0	0	0	0	0	0	0	0	0	0	0	150.679	0	49.5625	47.9021
grm3	chr5_9589843_9589872	88.7818	151.379	82.5405	140.161	93.9702	0	0	0	0	0	0	0	0	0	0	0	0	0	0	0	119.833	117.228	0	59.7881	0.247353	359.105	104.223	0.513151	0	0	0	0	0	0	0	0	0	0	0	0	0	0	0	0	0	47.9021
hpd	chr5_123181419_123181448	44.3909	193.06	172.567	174.174	304.518	0	0	0	0	0	0	0	0	0	0	0	0	0	0	0	175.462	0	0	29.8941	0.247353	0	0	0	0	0	0	0	0	0	0	0	0	0	0	0	0	0	75.3397	75.5484	99.1249	95.8043
mrgprx1	chr7_48021568_48021597	44.3909	216.074	154.246	264.571	258.516	9.32726	50.9907	0	0	0	0	0	0	0	0	0	0	0	0	0	215.329	0	0	0	0.247353	0	52.1114	0	0	0	0	0	0	0	0	0	0	0	0	0	0	0	226.019	0	0	47.9021
klhl29	chr12_5210144_5210173	88.7818	86.1738	123.712	95.8757	271.884	9.32726	0	0	0	0	0	0	0	0	0	0	0	0	0	0	154.833	0	0	59.7881	0	0	0	0	0	0	0	0	0	0	0	0	0	0	0	0	0	0	0	0	49.5625	0
kit	chr5_75607260_75607289	44.3909	175.16	154.443	157.054	130.536	0	0	0	0	0	0	0	0	0	0	0	0	0	0	0	235.494	0	0	0	0.247353	0	6722.37	0	0	0	0	0	0	0	0	0	0	0	0	0	0	0	75.3397	0	49.5625	0
des	chr1_75360562_75360591	44.3909	114.046	167.642	64.1454	140.759	9.32726	50.9907	0	0	0	0	0	0	0	0	0	0	0.481508	0.588496	0	164.336	1406.73	0	29.8941	58.6226	0.257055	52.1114	0.256576	1827.5	0	0	0	0	0	0	0	0	0	0	0	0	0	0	37.7742	0	23.9511
pde4dip	chr3_97755462_97755491	88.7818	263.38	195.024	342.185	62.9089	0	0	0	0	0	0	0	0	0	0	0	0	0	0.588496	0	240.593	117.228	219.687	29.8941	0.247353	0	156.334	0	0	0	0	0	0	0	0	0	0	0	0	0	0	0	0	37.7742	49.5625	47.9021
igf1	chr10_87915601_87915630	44.3909	8.43838	1.57595	52.7316	0	0	0	0	0	0	0	0	0	0	0	0	0	0	0	0	13.6753	0	0	0	0	0	0	0	0	0	0	0	0	0	0	0	0	0	0	0	0	0	0	0	0	0
lep	chr6_29070894_29070923	44.3909	52.4202	203.298	14.3814	30.0783	0	0	0	0	0	0	0	0	0	0	0	0	0	0	0	187.283	0	0	0	0	90.4832	52.1114	0.256576	0	0	0	0	0	0	0	0	0	0	0	0	0	0	75.3397	0	49.5625	47.9021
c1qtnf7	chr5_43615908_43615937	44.3909	160.585	141.245	129.889	238.071	0	0	0	0	0	0	0	0	0	0	0	0	0	0	0	94.8003	0	0	0	48.4811	0.257055	52.1114	0	0	0	0	0	0	0	0	0	0	0	0	0	0	0	301.359	37.7742	49.5625	0
nrxn1	chr17_90059519_90059548	88.7818	279.489	264.169	228.504	129.356	0	0	0	68.704	0	0	0	0	0	0	0	0	0	0.588496	0	415.823	234.456	0	0	0	0	0	0.256576	336.646	0	0	0	0	0	0	0	0	0	0	0	0	0	75.3397	75.5484	99.1249	0
ak5	chr3_152660538_152660567	88.7818	377.426	163.899	234.439	198.949	9.32726	0	0	0	0	0	0	0	0	0	0	0	0.481508	0	0	249.633	234.456	0	29.8941	0.247353	0	0	0	0	0	0	0	0	0	0	0	0	0	0	0	0	0	75.3397	0	0	47.9021
wdr82	chr9_106171353_106171382	44.3909	21.2238	145.185	9.58757	53.0794	0	0	0	0	0	0	0	0	0	0	0	0	0	0	0	82.5156	0	0	0	0	0	0	0	0	0	0	0	0	0	0	0	0	0	0	0	0	0	0	0	0	0
oca2	chr7_56283469_56283498	44.3909	212.749	167.642	149.064	189.71	0	0	0	68.704	0	0	0	0	0	0	0	0	0	0	0	188.673	0	109.843	29.8941	0	0.257055	0	0	0	0	0	0	0	0	0	0	0	0	0	0	0	0	75.3397	0	0	0
bmper	chr9_23300951_23300980	44.3909	100.238	128.243	63.004	132.109	0	0	0	68.704	0	0	0	0	0	0	0	0	0	0.588496	0	125.164	0	0	29.8941	0.247353	0	0	0	0	0	0	0	0	0	0	0	0	0	0	0	0	0	0	37.7742	0	0
glra4	chrX_136775884_136775913	44.3909	252.384	216.89	333.282	357.401	9.32726	0	0	0	0	0	0	0	0	0	0	0	0	0.588496	0	154.137	0	109.843	0	0.247353	0	0	0.513151	0	0	0	0	0	0	0	0	0	0	0	0	0	0	0	75.5484	99.1249	95.8043
cldn19	chr4_119257033_119257062	44.3909	399.928	232.453	378.252	128.963	0	0	0	68.704	0	0	0	0	0	0	0	0	0	0	0	209.302	117.228	0	0	0	0	104.223	0	0	0	0	0	0	0	0	0	0	0	0	0	0	0	150.679	37.7742	49.5625	71.8532
abi3bp	chr16_56668350_56668379	44.3909	373.846	356.559	273.017	230.404	0	0	0	274.816	0	0	0	0	0	0	0	0	0.963017	0	0	286.719	0	219.687	0	0	0.771164	104.223	0.513151	0	0	0	0	0	0	0	0	0	0	0	0	0	0	0	0	49.5625	71.8532
csf3	chr11_98702023_98702052	88.7818	330.631	192.463	368.437	163.76	0	0	0	68.704	0	0	0	0	0	0	0	0	0	0.588496	0	147.416	0	0	0	0	0	0	0	0	0	0	0	0	0	0	0	0	0	0	0	0	0	0	0	49.5625	71.8532
dnah11	chr12_117952561_117952590	88.7818	135.525	83.3285	16.6641	80.4054	0	0	0	68.704	0	0	0	0	6.25128	8118.34	46.0895	0	0	0	0	126.091	0	0	0	0	0.514109	0	0.256576	0	0	0	0	0	0	0	0	0	0	0	0	0	0	0	0	0	71.8532
atp2b3	chrX_73533905_73533934	88.7818	319.38	373.698	126.008	851.629	0	50.9907	3.4318	343.52	0	31.6312	13.981	4.10373	12.5026	16236.7	0	145.986	0.481508	0	0	382.214	0	109.843	59.7881	0	0	104.223	0.256576	0	0	0	0	0	0	0	0	0	0	0	0	0	0	301.359	37.7742	99.1249	95.8043
slc19a3	chr1_83013943_83013972	88.7818	104.073	162.323	87.886	463.757	0	0	0	0	0	0	0	0	0	0	0	0	0	0	0	226.223	117.228	0	59.7881	0	0	104.223	0.256576	0	0	0	0	0	0	0	0	0	0	0	0	0	0	226.019	75.5484	148.687	47.9021
herc1	chr9_66386678_66386707	44.3909	71.8541	104.21	138.107	66.0543	0	0	0	0	0	0	0	0	0	0	0	0	0	0	0	119.601	0	0	29.8941	68.2693	0.257055	52.1114	0.256576	0	0	0	0	0	0	0	0	0	0	0	0	0	0	0	0	0	47.9021
rb1	chr14_73216673_73216702	88.7818	180.019	125.091	219.829	205.24	9.32726	0	0	0	0	0	0	0	0	0	0	0	0	0.588496	0	119.833	0	109.843	59.7881	12.8623	0	156.334	0.256576	0	0	0	0	0	0	0	0	0	0	0	0	0	0	0	0	99.1249	47.9021
cntnap2	chr6_46759875_46759904	133.173	203.544	162.323	173.946	461.201	0	0	0	68.704	0	0	0	0	0	0	0	0	0	0	0	314.301	117.228	0	59.7881	0	0	104.223	0	0	0	0	0	0	0	0	0	0	0	0	0	0	0	75.3397	37.7742	0	47.9021
ropn1	chr16_34671190_34671219	88.7818	534.175	386.896	500.836	741.932	9.32726	0	0	68.704	0	0	0	0	0	0	0	0	0.963017	0.588496	0	400.525	0	0	29.8941	0	0.514109	52.1114	0.256576	0	0	0	0	0	0	0	0	0	0	0	0	0	0	301.359	75.5484	99.1249	119.755
galnt15	chr14_32040360_32040389	88.7818	244.457	274.61	366.839	137.417	0	0	0	0	0.928573	15.8156	19405.6	0	31.2564	0	0	0	0.481508	0	0	293.209	117.228	0	0	0.247353	0	0	0	0	0	5.60025	0	0	0	0	15.5651	0	0	0	5.45933	0	0	75.3397	0	49.5625	95.8043
kmt2c	chr5_25314997_25315026	88.7818	197.407	236.787	182.849	235.122	0	0	0	0	0	0	0	0	0	0	0	0	0.963017	0.588496	0	224.6	234.456	0	0	0	0	0	0.256576	0	0	0	0	0	0	0	0	0	0	0	0	0	0	0	0	99.1249	0
glyat	chr19_12650329_12650358	88.7818	163.398	95.9361	145.411	35.1897	0	0	0	0	0	0	0	0	0	0	0	0	0.481508	0	0	187.514	117.228	0	0	138.27	0.514109	52.1114	0	0	0	0	0	0	0	0	0	0	0	0	0	0	0	75.3397	75.5484	99.1249	0
ckmt2	chr13_91861300_91861329	88.7818	399.672	383.35	294.475	414.806	9.32726	0	0	206.112	0	0	0	0	0	0	0	0	1.44453	0	0	452.909	117.228	219.687	119.576	0	0	104.223	0	48.0922	0	0	0	0	0	0	0	0	0	0	0	0	0	226.019	113.323	49.5625	71.8532
spdef	chr17_27719957_27719986	44.3909	92.3108	63.4321	66.1999	57.4044	0	0	0	0	0	0	0	0	0	0	0	0	0	0	0	81.5885	0	0	0	0	0	0	0	0	0	0	0	0	0	0	0	0	0	0	0	0	0	0	37.7742	0	0
car6	chr4_150198131_150198160	44.3909	71.3427	81.5555	87.4295	206.813	0	0	0	0	0	0	0	0	0	0	0	0	0	0	0	85.5289	0	0	0	0	0	0	0	0	0	0	0	0	0	0	0	0	0	0	0	0	0	75.3397	37.7742	99.1249	47.9021
clec3b	chr9_123156862_123156891	133.173	182.576	278.353	261.832	176.931	0	0	0	137.408	0	0	0	0	0	0	0	0	0	0	0	298.076	0	0	0	0	0	0	0.513151	0	0	0	0	0	0	0	0	0	0	0	0	0	0	150.679	37.7742	49.5625	23.9511
ptchd3	chr11_121830555_121830584	44.3909	332.421	230.286	161.847	215.266	18.6545	0	0	137.408	0	0	0	0	0	0	0	0	0.481508	0.588496	0	280.229	0	109.843	59.7881	6.67852	0	104.223	0	0	0	0	0	0	0	0	0	0	0	0	0	0	0	75.3397	37.7742	0	71.8532
gm6614	chr6_141980890_141980919	44.3909	360.805	276.186	420.027	317.493	9.32726	0	0	0	0	0	0	0	0	0	0	0	0.481508	0	0	186.356	0	0	29.8941	9.89411	0.257055	52.1114	0	0	0	0	0	0	0	0	0	0	0	0	0	0	0	150.679	37.7742	49.5625	23.9511
ces1d	chr8_93189527_93189556	44.3909	119.16	223.785	112.54	126.408	0	0	0	0	0	0	0	0	0	0	0	0	0.481508	0	0	154.369	0	0	0	0.247353	152.947	52.1114	0	0	0	0	0	0	0	0	0	0	0	0	0	0	0	75.3397	37.7742	0	23.9511
tenm3	chr8_48292237_48292266	88.7818	62.3929	53.5824	49.3075	261.662	0	0	0	0	0	0	0	0	0	0	0	0	0	0	0	66.986	117.228	0	0	94.4887	0	52.1114	0.256576	0	0	0	0	0	0	0	0	0	0	0	0	0	0	0	37.7742	0	23.9511
casq2	chr3_102119967_102119996	88.7818	223.233	130.804	64.8302	126.604	0	0	0	0	0	0	0	0	0	0	0	0	0	0	0	197.945	0	0	0	0	0	0	0	0	0	0	0	0	0	0	0	0	0	0	0	0	0	0	0	99.1249	23.9511
slco1a1	chr6_141939985_141940014	88.7818	170.558	175.522	295.388	98.8849	9.32726	0	0	68.704	0	0	0	0	0	0	0	0	0.481508	0	0	196.554	0	0	0	0	0	0	0.256576	0	0	0	0	0	0	0	0	0	0	0	0	0	0	150.679	75.5484	49.5625	23.9511
p2ry12	chr3_59217811_59217840	177.564	219.654	152.276	153.858	301.766	0	0	0	0	0	0	0	0	0	0	0	0	0	0.588496	0	264.236	0	109.843	29.8941	0	0	52.1114	78.7687	0	0	0	0	0	0	0	0	0	0	0	0	0	0	226.019	0	99.1249	23.9511
ank3	chr10_69874867_69874896	44.3909	198.941	168.824	498.325	132.895	0	50.9907	0	0	0	0	0	0	0	0	0	0	0	0	0	248.474	0	219.687	0	0	0	156.334	0	0	0	0	0	0	0	0	0	0	0	0	0	0	0	75.3397	0	0	143.706
plac9a	chr14_25888982_25889011	88.7818	245.736	191.084	51.1337	124.835	0	0	0	137.408	0	0	0	0	0	0	0	0	0	0.588496	0	280.46	0	0	0	33.1453	0	104.223	30.0194	0	0	0	0	0	0	0	0	0	0	0	0	0	0	0	0	0	47.9021
dido1	chr2_180667959_180667988	88.7818	68.5299	34.08	18.262	188.137	9.32726	0	0	0	0	0	0	0	0	0	0	0	0	0	0	50.2975	0	0	0	0	0.257055	104.223	0	0	0	0	0	0	0	0	0	0	0	0	0	0	0	150.679	0	0	0
tbx3	chr5_119683016_119683045	44.3909	288.695	187.735	315.02	161.99	0	0	0	0	0	0	0	0	0	0	0	0	0	0	0	76.9528	0	109.843	0	0	0	0	0	0	0	0	0	0	0	0	0	0	0	0	0	0	0	75.3397	37.7742	99.1249	23.9511
ccar2	chr14_70142488_70142517	221.955	7.92696	7.87976	0	64.285	0	0	0	0	0	0	0	0	0	0	0	0	0	0	0	16.6886	0	109.843	89.6822	0.989411	1593.48	156.334	0.769727	0	0	0	0	0	0	0	0	0	0	0	0	0	0	0	0	0	0
tspan8	chr10_115833297_115833326	88.7818	111.233	113.863	26.7082	108.911	0	0	0	0	0	0	0	0	0	0	0	0	0	0	0	161.323	0	109.843	29.8941	0.247353	0.257055	0	0	0	0	0	0	0	0	0	0	0	0	0	0	0	0	75.3397	0	0	23.9511
huwe1	chrX_151908757_151908786	44.3909	102.795	202.313	0	11.7954	0	0	0	0	0	0	0	0	0	0	0	0	0	0	0	240.593	117.228	0	89.6822	0	0	52.1114	0	0	0	0	0	0	0	0	0	0	0	0	0	0	0	0	0	0	0
dpt	chr1_164808992_164809021	44.3909	210.959	270.079	19.1751	136.434	0	50.9907	0	68.704	0	0	0	0	0	0	0	0	0.481508	0.588496	0	224.368	0	0	0	0.247353	0	52.1114	0.256576	0	0	0	0	0	0	0	0	0	0	0	0	0	0	75.3397	37.7742	0	23.9511
adam33	chr2_131055297_131055326	44.3909	373.079	328.783	319.814	347.178	9.32726	0	0	0	0	0	0	0	0	0	0	0	0	1.17699	0	286.719	0	0	29.8941	34.382	0.257055	52.1114	0	0	0	0	0	0	0	0	0	0	0	0	0	0	0	150.679	37.7742	99.1249	0
atp1a2	chr1_172289387_172289416	44.3909	76.2011	60.6742	33.7848	0	0	0	0	0	0	0	0	0	0	0	0	0	0	0	0	63.9728	0	0	0	0	0	0	0	0	0	0	0	0	0	0	0	0	0	0	0	0	0	0	0	0	0
tmem213	chr6_38115556_38115585	88.7818	154.192	155.034	158.423	82.9611	0	0	0	0	0	0	0	0	0	0	0	0	0	0	0	124.701	0	0	0	0	0	0	0	0	0	0	0	0	0	0	0	0	0	0	0	0	0	150.679	37.7742	0	23.9511
mrgpra4	chr7_47981461_47981490	44.3909	96.4021	302.189	98.8433	83.3543	0	0	0	68.704	0	0	0	0	0	0	0	0	0.963017	0	0	157.846	0	0	0	0	0	0	0	0	0	0	0	0	0	0	0	0	0	0	0	0	0	75.3397	37.7742	49.5625	0
fat4	chr3_38891144_38891173	266.345	226.813	263.578	136.965	728.76	0	0	0	0	0	0	0	0	0	0	0	0	0	0	0	411.651	117.228	109.843	29.8941	0.247353	0.771164	104.223	0.513151	0	0	0	0	0	0	0	0	0	0	0	0	0	0	75.3397	75.5484	148.687	0
clca4b	chr3_144928306_144928335	88.7818	545.938	664.461	915.156	887.409	9.32726	101.981	0	68.704	0	0	0	0	0	0	0	0	0.481508	0.588496	0	709.727	117.228	109.843	29.8941	81.379	0.257055	104.223	82.1042	0	0	0	0	0	0	0	0	0	0	0	0	0	0	527.378	151.097	297.375	95.8043
mrgpra2a	chr7_47427043_47427072	44.3909	79.0139	83.3285	66.4282	69.0032	0	0	0	68.704	0	0	0	0	0	0	0	0	0	0	0	147.879	0	0	0	0	0	0	0	0	0	0	0	0	0	0	0	0	0	0	0	0	0	0	0	0	71.8532
grin2a	chr16_9761605_9761634	88.7818	207.38	260.032	210.47	357.794	9.32726	0	0	0	0	0	0	0	0	0	0	0	0	0	0	178.243	0	0	59.7881	0	0	469.003	0	0	0	0	0	0	0	0	0	0	0	0	0	0	0	150.679	75.5484	49.5625	95.8043
mlxipl	chr5_135121782_135121811	44.3909	204.311	253.137	257.723	535.905	9.32726	0	0	0	0	0	0	0	0	0	0	0	0	0	0	263.077	234.456	0	0	0.494705	0.257055	156.334	217.063	0	0	0	0	0	0	0	0	0	0	0	0	0	0	75.3397	0	49.5625	47.9021
agrn	chr4_156197350_156197379	133.173	251.106	263.775	218.916	353.076	0	0	0	0	0	0	0	0	0	0	0	0	0	0	0	190.759	117.228	0	0	0.247353	0	52.1114	0	0	0	0	0	0	0	0	0	0	0	0	0	0	0	753.397	54961.5	49.5625	119.755
ccl21c	chr4_41903830_41903859	44.3909	199.197	179.856	269.593	166.119	0	0	0	0	0	0	0	0	0	0	0	0	0	0	0	213.938	0	0	0	0	0	0	0	0	0	0	0	0	0	0	0	0	0	0	0	0	0	150.679	37.7742	49.5625	23.9511
afp	chr5_90496116_90496145	44.3909	339.069	147.352	96.5605	51.5067	0	0	0	68.704	0	0	0	0	0	0	0	0	0	0	0	112.184	117.228	0	29.8941	0	0	0	0	0	0	0	0	0	0	0	0	0	0	0	0	0	0	0	37.7742	0	0
usp44	chr10_93846223_93846252	44.3909	130.411	128.637	96.5605	113.236	0	50.9907	0	0	0	0	0	0	0	0	0	0	0	0	0	162.018	0	0	0	0	0	0	0	0	0	0	0	0	0	0	0	0	0	0	0	0	0	0	0	49.5625	0
mamdc2	chr19_23363698_23363727	44.3909	351.599	325.434	252.929	122.869	0	50.9907	0	0	0	0	0	0	0	0	0	0	0.481508	0	0	370.161	0	0	0	0	0	52.1114	0	0	0	0	0	0	0	0	0	0	0	0	0	0	0	226.019	37.7742	49.5625	47.9021
chrdl1	chrX_143303475_143303504	44.3909	139.105	125.485	190.382	137.417	9.32726	0	0	0	0	0	0	0	0	0	0	0	0	0.588496	0	113.111	0	0	0	0	0	0	0	0	0	0	0	0	0	0	0	0	0	0	0	0	0	75.3397	75.5484	49.5625	47.9021
kmt2c	chr5_25313247_25313276	44.3909	139.361	78.6006	148.151	82.1748	0	0	0	0	0	0	0	0	0	0	0	0	0.481508	0	0	206.289	234.456	0	59.7881	37.5976	0.514109	0	0	0	0	0	0	0	0	0	0	0	0	0	0	0	0	0	0	0	0
svep1	chr4_58107551_58107580	88.7818	249.571	366.409	210.47	78.2429	0	0	0	0	0	0	0	0	0	0	0	0	0	0	0	373.175	0	109.843	59.7881	46.997	0	104.223	0	0	0	0	0	0	0	0	0	0	0	0	0	0	0	0	75.5484	148.687	0
wdr82	chr9_106186486_106186515	44.3909	101.005	178.871	7.07654	335.776	0	0	0	0	0	0	0	0	0	0	0	0	0	0.588496	0	173.144	0	0	29.8941	0	0	104.223	0	0	0	0	0	0	0	0	0	0	0	0	0	0	0	75.3397	0	49.5625	23.9511
f10	chr8_13048246_13048275	133.173	259.544	166.066	150.434	237.678	0	0	0	68.704	0	20639.4	0	4.10373	6.25128	0	0	72.9928	0.481508	0	0	237.348	0	0	0	0	0	0	0	0	0	0	0	0	0	0	0	0	0	0	0	0	0	301.359	113.323	99.1249	23.9511
sis	chr3_72961005_72961034	88.7818	144.987	109.529	167.782	237.285	0	0	0	137.408	0	0	0	0	0	0	0	0	0	0.588496	0	190.064	0	0	0	0	0	0	0	0	0	0	0	0	0	0	0	0	0	0	0	0	0	150.679	37.7742	0	23.9511
car6	chr4_150197408_150197437	88.7818	193.316	287.217	252.016	306.484	0	0	0	68.704	0	0	0	0	0	0	0	0	0	0	0	298.54	0	109.843	29.8941	0.247353	0	0	0	0	0	0	0	0	0	0	0	0	0	0	0	0	0	150.679	37.7742	148.687	0
fmo2	chr1_162886294_162886323	88.7818	443.91	349.467	490.792	438.003	0	0	0	0	0	0	0	0	0	0	0	0	0.481508	0	0	347.678	0	0	29.8941	0.247353	0	104.223	0	0	0	0	0	0	0	0	0	0	0	0	0	0	0	226.019	151.097	198.25	71.8532
fmn2	chr1_174503409_174503438	133.173	369.243	304.356	290.595	80.4054	9.32726	0	0	68.704	0	0	0	0	0	0	0	0	0.481508	0	0	315.924	351.683	0	119.576	1925.64	0.514109	469.003	0.769727	0	0	0	0	0	0	0	0	0	0	0	0	0	0	150.679	37.7742	99.1249	23.9511
atp1a2	chr1_172293331_172293360	44.3909	192.293	156.61	66.4282	7.07725	0	0	0	68.704	0	0	0	0	0	0	0	0	0.481508	0	0	131.191	0	0	0	0	0	52.1114	0	0	0	0	0	0	0	0	0	0	0	0	0	0	0	0	75.5484	0	47.9021
grik1	chr16_88289586_88289615	44.3909	128.366	116.62	65.5151	6.29089	0	0	0	0	0	0	0	0	0	0	0	0	0	0	0	137.681	0	0	0	25.7247	0	0	0.769727	0	0	0	0	0	0	0	0	0	0	0	0	0	0	0	37.7742	0	0
naalad2	chr9_18376578_18376607	44.3909	97.6806	121.348	161.162	157.272	0	0	0	0	0	0	0	0	0	0	0	0	0	0	0	112.416	0	0	29.8941	0	0	0	0	0	0	0	0	0	0	0	0	0	0	0	0	0	0	75.3397	75.5484	49.5625	47.9021
tenm3	chr8_48279077_48279106	44.3909	200.731	187.341	60.9495	196.197	0	50.9907	0	0	0	0	0	0	0	0	0	0	0	0	0	220.66	0	0	0	52.9335	0	0	0	0	0	0	0	0	0	0	0	0	0	0	0	0	0	75.3397	37.7742	49.5625	47.9021
hepacam	chr9_37380755_37380784	44.3909	242.156	219.648	66.6564	58.5839	0	0	0	68.704	0	0	0	0	0	0	0	0	0.481508	0	0	359.731	117.228	0	29.8941	0	0	104.223	0.256576	0	0	0	0	0	0	0	0	0	0	0	0	0	0	150.679	0	99.1249	47.9021
mapk4	chr18_73930756_73930785	177.564	326.028	295.688	368.208	706.939	0	50.9907	0	0	0	0	0	0	0	0	0	0	0	0	0	424.399	0	109.843	59.7881	0	0	52.1114	0.513151	0	0	0	0	0	0	0	0	0	0	0	0	0	0	226.019	113.323	99.1249	95.8043
mfap4	chr11_61487088_61487117	44.3909	297.389	250.773	340.587	40.6942	0	0	0	0	0	0	0	0	0	0	0	0	0	0.588496	0	408.406	117.228	109.843	0	0	0	156.334	48.2362	0	0	0	0	0	0	0	0	0	0	0	0	0	0	75.3397	75.5484	0	0
esr1	chr10_4712530_4712559	44.3909	0	10.6377	0	0	0	0	0	0	0	0	0	0	0	0	0	0	0	0	0	25.4964	0	0	0	0	0	0	0	0	0	0	0	0	0	0	0	0	0	0	0	0	0	0	0	0	0
kit	chr5_75620914_75620943	44.3909	69.297	65.993	63.4606	147.05	0	0	0	68.704	0	0	0	0	0	0	0	0	0	0	0	86.6878	0	0	0	0	0	52.1114	0	0	0	0	0	0	0	0	0	0	0	0	0	0	0	0	0	0	0
ces1d	chr8_93178116_93178145	44.3909	221.188	151.291	114.366	187.94	0	0	0	0	0	0	0	0	0	0	0	0	0	0.588496	0	194.7	0	0	0	0.247353	0	52.1114	127.518	0	0	0	0	0	0	0	0	0	0	0	0	0	0	0	0	0	0
hs3st4	chr7_123983809_123983838	133.173	111.745	227.922	103.409	123.066	9.32726	0	0	0	0	0	0	0	0	0	0	0	0	0.588496	0	378.274	820.594	439.373	209.259	2053.77	1.02822	416.891	1.0263	0	0	0	0	0	0	0	0	0	0	0	0	0	0	0	75.5484	198.25	0
wif1	chr10_121084917_121084946	44.3909	170.302	159.959	57.7537	94.1668	0	0	0	68.704	0	20117.5	0	0	0	0	0	72.9928	0	0	0	220.196	117.228	219.687	29.8941	0	0.514109	52.1114	0	0	0	0	0	0	0	0	0	0	0	0	0	0	0	150.679	0	0	0
ppp1r14a	chr7_29289369_29289398	88.7818	412.202	426.886	399.025	597.438	0	50.9907	0	0	0	0	0	0	0	0	0	0	0	0	0	432.975	117.228	109.843	0	0	0.257055	104.223	0	0	0	0	0	0	0	0	0	0	0	0	0	0	0	452.038	113.323	21064	23.9511
tspan8	chr10_115835116_115835145	44.3909	297.645	152.473	571.83	386.89	9.32726	0	0	0	0	0	0	0	0	0	0	0	0.481508	0	0	183.574	0	0	29.8941	0	0	52.1114	0	0	0	0	0	0	0	0	0	0	0	0	0	0	0	75.3397	75.5484	148.687	71.8532
jph2	chr2_163397197_163397226	44.3909	285.115	339.618	271.42	329.289	0	0	0	0	0	0	0	0	0	0	0	0	0.481508	0	0	335.162	0	0	89.6822	0.247353	0.257055	104.223	0.513151	0	0	0	0	0	0	0	0	0	0	0	0	0	0	75.3397	75.5484	99.1249	119.755
gm10591	chr4_41904114_41904143	88.7818	268.238	303.962	181.479	105.372	9.32726	0	0	0	0	0	0	0	0	0	0	0	0	0	0	295.758	117.228	0	29.8941	0	0	156.334	0	0	0	0	0	0	0	0	0	0	0	0	0	0	0	75.3397	37.7742	49.5625	71.8532
npr1	chr3_90459311_90459340	44.3909	121.717	98.891	191.523	138.793	0	0	0	0	0	0	0	0	0	0	0	0	0	0	0	91.0917	0	0	0	0	0	0	0	0	0	0	0	0	0	0	0	0	0	0	0	0	0	0	75.5484	0	23.9511
cd300lg	chr11_102054090_102054119	44.3909	61.6257	167.445	77.8419	27.1295	0	0	0	68.704	0	0	0	0	0	0	0	0	0	0	0	157.151	0	0	0	0.494705	0	0	0	0	0	0	0	0	0	0	0	0	0	0	0	0	0	301.359	0	0	0
sec22b	chr3_97901391_97901420	88.7818	183.087	502.335	116.877	92.3974	18.6545	0	0	0	0	0	0	0	0	0	0	0	0	0	0	477.246	117.228	219.687	119.576	211.239	0.257055	52.1114	0.256576	0	0	0	0	0	0	0	0	0	0	0	0	0	0	0	0	49.5625	23.9511
irx1	chr13_71960245_71960274	44.3909	157.772	116.227	330.543	34.7965	0	0	0	0	0	0	0	0	0	0	0	0	0.481508	0	0	202.581	117.228	109.843	59.7881	449.935	55.7808	104.223	0	0	0	0	0	0	0	0	0	0	0	0	0	0	0	75.3397	0	0	23.9511
gpld1	chr13_24955118_24955147	88.7818	85.6623	120.757	57.982	16.5136	9.32726	0	0	0	0	0	0	0	0	0	0	0	0	0	0	198.177	0	0	29.8941	0	0	0	0	0	0	0	0	0	0	0	0	0	0	0	5.45933	4864.83	0	150.679	0	0	23.9511
plxna4	chr6_32196235_32196264	88.7818	64.6942	135.335	0.228275	104.783	0	0	0	68.704	0	0	0	0	0	0	0	0	0	0	0	127.946	0	0	0	0	0.257055	0	0	0	0	0	0	0	0	0	0	0	0	0	0	0	0	0	0	49.5625	0
fam189a2	chr19_23984739_23984768	44.3909	182.064	216.89	258.864	193.248	9.32726	0	0	68.704	0	0	0	0	0	0	0	0	0	0	0	241.289	0	0	59.7881	0	0	52.1114	21.8089	0	0	0	0	0	0	0	0	0	0	0	0	0	0	150.679	113.323	0	47.9021
itga7	chr10_128939080_128939109	44.3909	199.453	326.616	155.227	130.536	0	0	0	0	0	0	0	0	0	0	0	0	0.481508	0	1123.45	204.667	117.228	0	59.7881	0.247353	0	52.1114	0.256576	0	0	0	0	0	0	0	0	17.6688	0	0	0	0	0	0	75.5484	99.1249	23.9511
itih2	chr2_10106695_10106724	44.3909	162.886	111.302	43.8289	65.4646	0	50.9907	0	0	0	0	0	0	0	0	0	0	0	0	0	92.0189	0	0	0	0	0	0	0.256576	0	0	0	0	0	0	0	0	0	0	0	0	0	0	0	0	0	0
gm13304	chr4_41904115_41904144	88.7818	303.782	208.814	137.878	299.407	9.32726	0	0	0	0	0	0	0	0	0	0	0	0	0.588496	0	327.281	0	0	29.8941	0.247353	0	104.223	0.256576	0	0	0	0	0	0	0	0	0	0	0	0	0	0	75.3397	0	99.1249	71.8532
cidec	chr6_113433136_113433165	44.3909	242.156	309.478	338.761	515.656	9.32726	0	0	0	0	0	0	0	0	0	0	0	0	0	0	169.899	117.228	0	0	0	0	0	0	0	0	0	0	0	0	0	0	0	0	0	0	0	0	150.679	113.323	99.1249	23.9511
capn6	chrX_143807987_143808016	44.3909	0	3.93988	0	0	0	0	0	0	0	0	0	0	0	0	0	0	0	0	0	8.80785	0	0	0	0	0	0	0	0	0	0	0	0	0	0	0	0	0	0	0	0	0	0	0	0	0
ccar2	chr14_70141717_70141746	44.3909	225.279	265.351	84.2336	50.9169	0	0	0	0	0	0	0	0	0	0	0	0	0	0	0	266.785	0	0	0	0	0.257055	0	0.256576	0	0	0	0	0	0	0	0	0	0	0	0	0	0	0	75.5484	49.5625	47.9021
nrg2	chr18_36045846_36045875	44.3909	226.813	212.36	174.859	344.23	0	0	0	68.704	0	0	0	0	0	0	0	0	0.481508	0	0	337.016	0	109.843	0	0	0	52.1114	0	0	0	0	0	0	0	0	0	0	0	0	0	0	0	75.3397	37.7742	99.1249	47.9021
cbfb	chr8_105171364_105171393	44.3909	152.914	188.72	17.3489	61.9259	0	0	0	0	0	0	0	0	0	0	0	0	0	0.588496	0	145.098	0	0	0	0	0	0	0	0	0	0	0	0	0	0	0	0	0	0	0	0	0	150.679	0	0	0
9330159f19rik	chr10_29221878_29221907	44.3909	181.042	164.884	190.61	162.384	0	0	0	0	0	0	0	0	0	0	0	0	0	0	0	204.667	117.228	0	0	0	0	0	0	0	0	0	0	0	0	0	0	0	0	0	0	0	0	0	0	0	23.9511
hoxa6	chr6_52206599_52206628	88.7818	389.955	250.182	219.829	118.741	0	0	0	206.112	0	0	0	0	0	0	0	0	0	0.588496	0	339.102	0	0	29.8941	0	0	0	0.256576	0	0	0	0	0	0	0	0	0	0	0	0	0	0	75.3397	0	0	119.755
hspb6	chr7_30553465_30553494	44.3909	144.475	141.836	116.877	220.771	0	0	0	0	0	0	0	0	0	0	0	0	0	0	0	119.833	117.228	0	0	0.494705	0	0	0.256576	0	0	0	0	0	0	0	0	0	0	0	0	0	0	0	0	148.687	0
wdr82	chr9_106184708_106184737	44.3909	28.6393	75.0547	0	0.19659	0	0	0	68.704	0	0	0	0	0	0	0	0	0	0	0	57.9464	117.228	0	0	0	0	0	0	0	0	0	0	0	0	0	0	0	0	0	0	0	0	0	0	0	0
9330159f19rik	chr10_29218160_29218189	44.3909	216.074	244.864	240.374	828.825	0	0	0	68.704	0	0	0	0	0	0	0	0	0	0.588496	0	296.685	0	0	29.8941	25.4773	0	0	0	0	0	0	0	0	0	0	0	0	0	0	0	0	0	150.679	113.323	99.1249	47.9021
mrgprb2	chr7_48552771_48552800	44.3909	234.229	259.835	416.146	368.607	0	0	0	0	0	0	0	0	0	0	0	0	0.481508	0	0	354.4	117.228	0	59.7881	0.247353	0.257055	52.1114	0.256576	0	0	0	0	0	0	0	0	0	0	0	0	0	0	226.019	37.7742	0	95.8043
adrb2	chr18_62179487_62179516	44.3909	285.371	183.401	248.364	127.587	0	0	0	0	0	0	0	0	0	0	0	0	0.481508	0	0	158.541	0	109.843	29.8941	0.247353	0.257055	0	15.6511	0	0	0	0	0	0	0	0	0	0	0	0	0	0	75.3397	0	49.5625	47.9021
aspa	chr11_73319793_73319822	88.7818	205.845	299.825	274.159	449.209	0	50.9907	0	0	0	0	0	0	0	0	0	0	0	0	0	211.852	0	109.843	119.576	0.247353	0	1459.12	0	0	0	0	0	0	0	0	0	0	0	0	0	0	0	0	75.5484	148.687	23.9511
fat2	chr11_55292015_55292044	44.3909	205.845	153.655	180.566	336.759	9.32726	0	0	0	0	0	0	0	0	0	0	0	0	0	0	280.692	117.228	109.843	0	0.247353	0	0	0	0	0	0	0	0	0	0	0	0	0	0	0	0	0	226.019	113.323	148.687	71.8532
hmgcs2	chr3_98291133_98291162	44.3909	290.229	228.71	300.41	300.193	9.32726	0	0	206.112	0	0	0	0	0	0	0	0	0.963017	0	0	301.089	0	109.843	29.8941	54.4176	0	52.1114	0.256576	0	0	0	0	0	0	0	0	0	0	0	0	0	0	75.3397	75.5484	148.687	71.8532
foxa1	chr12_57543148_57543177	44.3909	305.06	258.653	128.747	219.395	9.32726	0	0	0	0	0	0	0	0	0	0	0	0	0	0	246.852	0	0	0	0.247353	0	0	0.256576	0	0	0	0	0	0	0	0	0	0	0	0	0	0	0	0	49.5625	71.8532
chl1	chr6_103693130_103693159	44.3909	109.188	107.559	186.729	34.0101	9.32726	0	0	0	0	0	0	0	0	0	0	0	0	0	0	139.535	0	109.843	0	0	0.257055	52.1114	0	0	0	0	0	0	0	0	0	0	0	0	0	0	0	75.3397	0	0	23.9511
gys2	chr6_142472768_142472797	44.3909	295.343	162.52	454.953	103.013	9.32726	0	0	0	0	0	0	0	0	0	0	0	0	0.588496	0	339.334	117.228	329.53	59.7881	0.247353	0.257055	52.1114	0	0	0	0	0	0	0	0	0	0	0	0	0	0	0	150.679	37.7742	0	71.8532
mrgprb2	chr7_48552072_48552101	44.3909	274.375	292.536	178.968	215.856	0	0	0	0	0	0	0	0	0	0	0	0	0.481508	0	0	415.36	117.228	0	89.6822	1.23676	0	52.1114	0	0	0	0	0	0	0	0	0	0	0	0	0	0	0	75.3397	37.7742	49.5625	47.9021
sntg2	chr12_30307323_30307352	133.173	155.726	205.662	138.791	138.006	0	0	0	137.408	0	0	0	0	0	0	0	0	0	0.588496	0	245.693	117.228	0	29.8941	0	0	52.1114	0.256576	0	0	0	0	0	0	0	0	0	0	0	0	0	0	75.3397	37.7742	148.687	0
rergl	chr6_139494879_139494908	44.3909	115.58	99.876	252.473	68.0202	0	0	0	0	0	0	0	0	0	0	0	0	0	0	0	195.395	0	0	0	0	0	0	0	0	0	0	0	0	0	0	0	0	0	0	0	0	0	75.3397	75.5484	99.1249	47.9021
arhgap20	chr9_51848925_51848954	88.7818	360.805	324.449	760.386	438.003	9.32726	0	0	0	0	15.8156	0	0	0	0	0	44890.5	0.481508	0.588496	0	309.434	0	0	0	0.247353	0.257055	0	0	0	0	0	0	0	0	0	0	0	0	0	0	0	0	75.3397	151.097	198.25	143.706
mrpl17	chr7_105810845_105810874	44.3909	113.023	219.845	0	0.19659	0	50.9907	0	137.408	0	0	0	0	0	0	0	0	0	0	0	259.368	117.228	109.843	59.7881	0	0	52.1114	0	0	0	0	0	0	0	0	0	0	0	0	0	0	0	0	0	49.5625	0
jph2	chr2_163376204_163376233	44.3909	319.124	390.048	202.709	189.513	0	0	0	137.408	0	0	0	0	0	0	0	0	0.481508	0	0	190.759	0	109.843	29.8941	0	0	0	0	0	0	0	0	0	0	0	0	0	0	0	0	0	0	0	37.7742	148.687	71.8532
1700009n14rik	chr4_39451036_39451065	44.3909	8.9498	96.5271	0.228275	0	0	0	0	0	0	0	0	0	0	0	0	0	0	0	0	25.4964	0	109.843	0	0.247353	0.257055	104.223	171.393	0	0	0	0	0	0	36.2209	0	0	0	0	0	0	56.2638	75.3397	0	0	0
pappa2	chr1_158936238_158936267	88.7818	344.439	337.845	114.594	223.327	9.32726	0	0	0	0	0	0	0	0	0	0	0	0	0	0	393.108	0	109.843	0	0	0	52.1114	0.256576	0	0	1.12005	0	0	0	0	0	0	0	0	5.45933	0	0	226.019	0	99.1249	0
ccdc178	chr18_22024744_22024773	44.3909	124.019	133.168	74.8743	92.9872	0	0	0	0	0	0	0	0	0	0	0	0	0	0	0	142.548	0	0	29.8941	0.247353	0	52.1114	0.256576	0	0	0	0	0	0	0	0	0	0	0	0	0	0	0	0	0	47.9021
angptl1	chr1_156845232_156845261	44.3909	228.348	234.817	79.4399	279.748	9.32726	0	0	68.704	0	0	0	0	0	0	0	0	0	0	0	188.442	234.456	109.843	29.8941	0	0.257055	52.1114	0.256576	0	0	0	0	0	0	0	0	0	0	0	0	0	0	150.679	0	0	23.9511
cntfr	chr4_41669729_41669758	44.3909	396.604	251.561	444.224	448.226	0	0	0	68.704	0	0	0	0	0	0	0	0	0.481508	0	0	270.957	0	0	0	4.6997	0	52.1114	0.256576	0	0	0	0	0	0	0	0	0	0	0	0	0	0	0	113.323	49.5625	71.8532
apc	chr18_34315182_34315211	44.3909	136.037	68.16	58.4385	28.1124	9.32726	0	0	0	0	0	0	0	0	0	0	0	0	1.17699	0	91.3235	0	0	59.7881	0	0	52.1114	0	0	0	0	0	0	0	0	0	0	0	0	0	0	0	0	0	0	0
sgk2	chr2_163004259_163004288	133.173	367.709	415.067	238.32	276.799	0	0	0	0	0	0	0	0	0	0	0	0	0.963017	0.588496	0	355.095	117.228	109.843	0	0	0	0	0	0	0	0	0	0	0	0	0	0	0	0	0	0	0	0	37.7742	148.687	71.8532
pnpt1	chr11_29141672_29141701	44.3909	27.6165	91.0113	0	15.5306	0	0	0	68.704	0	0	0	0	0	0	0	0	0	0	0	58.41	117.228	0	29.8941	0	0.257055	0	0	0	0	0	0	0	0	0	0	0	0	0	0	0	0	0	0	49.5625	0
sertm1	chr3_54899428_54899457	44.3909	132.201	179.265	130.574	251.046	0	0	0	0	0	0	0	0	0	0	0	0	0	0	0	210.693	0	0	59.7881	42.2973	0	0	0	0	0	0	0	0	0	0	0	0	0	0	0	0	0	0	0	0	47.9021
bmp3	chr5_98855367_98855396	44.3909	106.119	237.969	215.492	805.824	0	0	0	0	0	0	0	0	0	0	0	0	0	0	0	268.871	0	0	59.7881	0.247353	0	0	0	0	0	0	0	0	0	0	0	0	0	0	0	0	0	75.3397	75.5484	49.5625	95.8043
fgfbp1	chr5_43979833_43979862	88.7818	153.169	258.456	63.6888	72.935	0	0	0	0	0	0	0	0	0	0	0	0	0	0.588496	0	256.587	0	0	0	0	0	0	0	0	0	0	0	0	0	0	0	0	0	0	0	0	0	0	75.5484	148.687	71.8532
klk7	chr7_43812939_43812968	44.3909	103.818	101.058	70.7654	0.19659	0	50.9907	0	0	0	0	0	0	0	0	0	0	0	0	0	101.522	0	0	29.8941	0	0	0	0	0	0	0	0	0	0	0	0	0	0	0	0	0	0	0	0	0	0
hif3a	chr7_17050541_17050570	44.3909	179.252	176.901	102.952	196.983	0	0	0	137.408	0	0	0	0	0	0	0	0	0	0.588496	0	233.408	0	0	59.7881	0	0	104.223	0.513151	96.1845	0	0	0	0	0	0	0	0	0	0	0	0	0	0	37.7742	0	47.9021
spen	chr4_141475874_141475903	44.3909	138.85	186.159	39.2634	280.731	0	0	0	0	0	0	0	0	0	0	0	0	0	0	0	205.826	0	109.843	0	0.494705	0	104.223	0	0	0	0	0	0	0	0	0	0	0	0	0	0	0	0	37.7742	0	23.9511
rasgef1c	chr11_49957198_49957227	88.7818	301.992	202.313	262.06	375.291	0	0	0	0	0	0	0	0	0	0	0	0	0	0.588496	0	122.151	0	0	119.576	13.8517	51.4109	52.1114	0	0	0	1080.85	0	0	0	0	0	0	0	0	0	0	0	75.3397	37.7742	49.5625	47.9021
mamdc2	chr19_23378793_23378822	44.3909	125.809	112.681	228.96	92.3974	27.9818	0	0	68.704	0	0	0	0	0	0	0	0	0.481508	0	0	102.681	0	109.843	0	0	7.45458	938.005	0	0	0	0	0	0	0	0	0	0	0	0	0	0	0	0	0	49.5625	23.9511
adrb2	chr18_62179184_62179213	44.3909	167.233	183.992	24.882	119.92	0	0	0	0	0	0	0	0	0	0	0	0	0	1.17699	0	189.369	0	0	0	0	0	0	0	0	0	0	0	0	0	0	0	0	0	0	0	0	0	0	0	0	0
dnase1l3	chr14_7983044_7983073	44.3909	152.402	166.657	93.1364	212.907	9.32726	0	0	0	0	0	0	0	0	0	0	0	0	0	0	141.621	0	109.843	0	0.247353	0	0	0	0	0	0	0	0	0	0	0	0	0	0	0	0	0	0	75.5484	99.1249	23.9511
map3k1	chr13_111760130_111760159	88.7818	238.065	167.839	177.37	109.697	0	0	0	0	0	0	0	0	0	0	0	0	0	0	0	280.229	117.228	0	29.8941	15.8306	0.257055	0	0.256576	0	0	0	0	0	0	0	0	0	0	0	0	0	0	0	0	49.5625	47.9021
stab2	chr10_86933385_86933414	133.173	115.58	208.223	54.1013	198.753	0	0	0	0	0	0	0	0	0	0	0	0	0	0	0	339.334	117.228	0	0	124.913	0	0	0.256576	0	0	0	0	0	0	0	0	0	0	0	0	0	0	0	0	0	47.9021
cldn5	chr16_18777497_18777526	44.3909	390.723	416.445	328.032	536.888	0	0	0	68.704	0	0	0	0	0	0	0	0	0	1.76549	0	458.935	117.228	0	149.47	0	0.257055	0	0	0	0	0	0	0	0	0	0	0	0	0	0	0	0	0	37.7742	49.5625	95.8043
samd5	chr10_9674896_9674925	44.3909	346.996	231.665	193.121	266.97	0	0	0	0	0	0	0	0	0	0	0	0	0	0	0	322.182	0	0	59.7881	0.494705	0	52.1114	0.256576	0	0	0	0	0	0	0	0	0	0	0	0	0	0	75.3397	37.7742	0	0
nbas	chr12_13583537_13583566	44.3909	116.092	296.476	59.5799	152.554	0	0	0	0	0	0	0	0	0	0	0	0	0	0	0	222.282	0	0	29.8941	0	0	0	0.256576	0	0	0	0	0	0	0	0	0	0	0	0	0	0	0	37.7742	49.5625	47.9021
atoh8	chr6_72234758_72234787	44.3909	222.722	347.498	194.491	485.775	9.32726	0	0	343.52	0	0	0	0	0	0	0	0	0	0	0	201.422	117.228	219.687	0	71.9796	0.257055	0	0.256576	0	0	0	0	0	0	0	0	0	0	0	0	0	0	226.019	151.097	148.687	95.8043
lrrc3b	chr14_15358233_15358262	44.3909	218.375	209.602	176.685	553.402	9.32726	0	0	68.704	0	0	0	0	0	0	0	0	0.963017	0	0	137.449	0	109.843	29.8941	0	238.032	0	0	0	0	0	0	0	0	0	0	0	0	0	0	0	0	226.019	75.5484	99.1249	47.9021
neurog2	chr3_127633824_127633853	44.3909	218.119	183.795	157.054	230.404	0	0	0	0	0	0	0	0	0	0	0	0	0	0	0	318.937	117.228	0	29.8941	0.494705	0.257055	52.1114	0.256576	0	0	0	0	0	0	0	0	0	0	0	0	0	0	150.679	0	99.1249	47.9021
vit	chr17_78601876_78601905	44.3909	365.407	345.528	182.849	200.719	0	0	0	274.816	0	0	0	0	0	0	0	0	0.481508	0	0	427.876	351.683	0	59.7881	0.494705	0	52.1114	0.256576	0	0	0	0	0	0	0	0	0	0	0	0	0	0	75.3397	113.323	148.687	47.9021
hlf	chr11_90340827_90340856	44.3909	396.092	287.414	700.121	227.062	18.6545	0	0	0	0	0	0	0	0	0	0	0	0	0.588496	0	215.561	351.683	0	29.8941	393.291	0	156.334	0.256576	0	0	0	0	0	0	0	0	0	0	0	0	0	0	301.359	75.5484	49.5625	71.8532
klk5	chr7_43845247_43845276	44.3909	200.731	228.71	260.462	357.794	0	0	0	0	0	0	0	0	0	0	0	0	0	0.588496	0	106.621	0	109.843	0	0	0	0	0	0	0	0	0	0	0	0	0	0	0	0	0	0	0	226.019	37.7742	99.1249	23.9511
tshz2	chr2_169633754_169633783	44.3909	292.786	506.275	218.688	76.4736	0	50.9907	0	68.704	0	0	0	0	0	0	0	0	0.481508	0.588496	0	141.853	0	0	0	0	0.257055	0	0	0	0	0	0	0	0	0	0	0	0	0	0	0	0	0	37.7742	0	23.9511
pfkfb1	chrX_150628795_150628824	44.3909	195.873	158.186	155.912	362.906	0	0	0	0	0	0	0	0	0	0	0	0	0	0	0	213.938	0	109.843	0	0	0.257055	104.223	0.256576	0	0	0	0	0	0	0	0	0	0	0	0	0	0	75.3397	0	148.687	71.8532
pbrm1	chr14_31046333_31046362	44.3909	19.9453	69.7359	0	106.355	0	0	0	0	0	0	0	0	0	0	0	0	0	0	0	64.4364	0	0	0	0	0	0	0	0	0	0	0	0	0	0	0	0	0	0	0	0	0	0	0	49.5625	47.9021
p2rx6	chr16_17562113_17562142	88.7818	211.215	284.853	145.411	108.518	0	0	0	0	0	0	0	0	0	0	0	0	0	0	0	388.473	351.683	109.843	59.7881	0.247353	0.257055	0	0	0	0	2.2401	72.9928	0	0	0	0	0	0	0	0	0	0	0	37.7742	0	71.8532
zbtb16	chr9_48831752_48831781	44.3909	149.589	107.165	230.786	19.2659	0	50.9907	0	206.112	0	0	0	0	0	0	0	0	0	0	0	106.853	0	0	0	0	0	0	0	0	0	0	0	0	0	0	0	0	0	0	0	0	0	75.3397	0	0	0
nrg2	chr18_36196840_36196869	88.7818	341.882	293.718	75.1026	304.715	9.32726	0	0	0	0	0	0	0	0	0	0	0	0.481508	0.588496	0	344.433	0	109.843	59.7881	0	0.514109	0	0	0	0	0	0	0	0	0	0	0	0	0	0	0	0	0	0	99.1249	71.8532
rgn	chrX_20557526_20557555	88.7818	294.832	228.316	115.507	390.428	0	0	0	0	0	0	0	0	0	0	0	0	0	0	0	375.956	351.683	109.843	0	0	0.257055	52.1114	0	0	0	0	0	0	0	0	0	0	0	0	0	0	0	75.3397	0	49.5625	0
hoxa6	chr6_52208392_52208421	88.7818	141.151	149.125	340.587	265.004	0	0	0	0	0	0	0	0	0	0	0	0	0.963017	0	0	205.594	117.228	0	0	0.247353	0	0	0	0	0	0	0	0	0	0	0	0	0	0	0	0	0	376.698	37.7742	99.1249	47.9021
ptprc	chr1_138094267_138094296	88.7818	156.238	76.8277	23.5124	12.7784	0	0	0	0	0	0	0	0	0	0	0	0	0	0	0	181.72	0	0	0	0	0	104.223	0	0	0	0	0	0	0	0	0	0	0	0	0	0	0	0	0	0	23.9511
hoxa5	chr6_52204025_52204054	44.3909	383.563	394.579	253.157	316.117	0	0	0	137.408	0	0	0	0	0	0	0	0	0	0	0	528.935	0	109.843	209.259	0.247353	0	52.1114	0.256576	0	0	0	0	0	0	0	0	0	0	0	0	0	0	150.679	0	99.1249	23.9511
mrgprb5	chr7_48168495_48168524	44.3909	146.777	100.467	66.6564	20.4454	0	0	0	0	0	0	0	0	0	0	0	0	0	0	0	60.7278	0	0	29.8941	25.972	0.257055	52.1114	0	0	0	0	0	0	0	0	0	0	0	0	0	0	0	0	0	99.1249	23.9511
syn2	chr6_115135190_115135219	133.173	367.197	399.898	391.264	412.053	0	0	0	0	0	0	0	0	0	0	0	0	0	0	0	851.812	117.228	109.843	59.7881	0.989411	0.257055	104.223	0.513151	0	0	0	0	0	0	0	0	0	0	0	0	0	0	0	113.323	49.5625	95.8043
ntrk2	chr13_58934032_58934061	44.3909	36.3106	145.776	94.0495	86.6963	0	0	0	0	0	0	0	0	0	0	0	0	0	0	0	62.1185	117.228	0	0	0.247353	0	0	0	0	0	0	0	0	0	0	0	0	0	0	0	0	0	75.3397	37.7742	49.5625	23.9511
afp	chr5_90492671_90492700	44.3909	162.886	179.856	71.4502	263.824	0	0	0	0	0	0	0	0	0	0	0	0	0	0	0	196.554	117.228	0	0	0.247353	0	0	0	0	0	0	0	0	0	0	0	0	0	0	0	0	0	150.679	0	49.5625	0
cd36	chr5_17814710_17814739	44.3909	194.338	187.538	138.563	115.202	0	0	0	137.408	0	0	0	0	0	0	0	0	0	0	0	202.581	0	0	0	0	0	0	0	0	0	0	0	0	0	0	0	0	0	0	0	0	0	75.3397	0	99.1249	23.9511
ric3	chr7_109057953_109057982	133.173	177.717	184.583	202.024	89.0554	0	0	0	68.704	0	0	0	0	0	0	0	0	0	0	0	202.812	0	0	59.7881	0.494705	0	52.1114	0	0	0	0	0	0	0	0	0	0	0	0	0	0	0	0	0	49.5625	47.9021
kcnb1	chr2_167105811_167105840	88.7818	144.731	162.323	129.204	39.3181	0	0	0	0	0	0	0	0	0	0	0	0	0.481508	0	0	183.574	234.456	0	0	0.494705	0	104.223	0	0	0	0	0	0	0	0	0	0	0	0	0	0	0	0	0	49.5625	0
fgfbp1	chr5_43979454_43979483	44.3909	178.996	165.475	121.671	89.252	9.32726	0	0	0	0	0	0	0	0	0	0	0	0	0	0	133.74	0	0	0	0	0	0	0	0	0	0	0	0	0	0	0	0	0	0	0	0	0	0	37.7742	49.5625	23.9511
ric3	chr7_109057904_109057933	44.3909	236.019	246.046	238.091	61.5328	0	0	0	137.408	0	0	0	0	0	0	0	0	0	0	0	152.978	117.228	0	29.8941	0	0	52.1114	7.44069	0	0	0	0	0	0	0	0	0	0	0	0	0	0	75.3397	0	99.1249	47.9021
rhox13	chrX_38121373_38121402	88.7818	398.138	327.995	502.891	184.205	0	0	0	137.408	0	0	0	0	0	0	0	0	0.481508	0	0	446.419	0	109.843	0	0.247353	0.257055	0	0	0	0	0	0	0	0	0	0	0	0	0	0	0	0	75.3397	188.871	49.5625	0
trhde	chr10_114801055_114801084	88.7818	206.357	320.312	292.421	515.656	0	0	0	0	0	0	0	0	0	0	0	0	0	0	0	321.95	117.228	109.843	89.6822	0	0	104.223	0	0	0	0	0	0	0	0	0	0	0	0	0	0	0	376.698	113.323	99.1249	47.9021
pkd1l2	chr8_117065683_117065712	88.7818	197.151	260.623	147.922	143.708	0	50.9907	0	0	0	0	0	0	0	0	0	0	0	0	0	213.474	351.683	109.843	0	0.247353	0	52.1114	469.277	0	0	0	0	0	0	0	0	0	0	0	0	0	0	150.679	0	0	23.9511
gm13304	chr4_41904165_41904194	88.7818	150.868	227.331	122.356	26.9329	9.32726	0	0	0	0	0	0	0	0	0	0	0	0	0	0	174.071	0	0	0	0	0	0	0	0	0	0	0	0	0	0	0	0	0	0	0	0	0	0	37.7742	99.1249	47.9021
ptgfr	chr3_151835075_151835104	44.3909	201.754	179.068	302.922	11.992	0	0	0	137.408	0	0	0	0	0	0	0	0	0	0	0	155.065	0	0	0	0.494705	0	0	0	0	0	0	0	0	0	0	0	0	0	0	0	0	0	0	75.5484	49.5625	0
zfp142	chr1_74570965_74570994	44.3909	110.21	97.5121	42.231	0	0	0	0	0	1013.07	0	0	0	0	0	0	0	0	0	0	156.223	0	0	0	0.494705	0	52.1114	0	0	0	0	0	0	0	0	0	0	0	0	0	0	0	150.679	75.5484	0	23.9511
lrrn4cl	chr19_8851790_8851819	88.7818	138.85	290.96	61.8626	143.511	0	0	0	137.408	0	0	0	0	0	0	0	0	0	0	0	273.507	0	0	59.7881	0.247353	0	0	0.256576	0	0	0	0	0	0	0	0	0	0	0	0	0	0	0	0	49.5625	0
klhl13	chrX_23261434_23261463	88.7818	251.106	299.234	139.476	88.6622	0	0	0	137.408	0	0	0	0	0	0	0	0	0.481508	0.588496	0	310.129	0	109.843	59.7881	0.247353	0	0	0	0	0	0	0	0	0	0	0	0	0	0	0	0	0	150.679	0	0	23.9511
mrgpra2b	chr7_47464604_47464633	44.3909	143.197	114.651	118.932	129.356	9.32726	0	0	0	0	0	0	0	0	0	0	0	0	0	0	186.124	0	0	0	0	0	52.1114	0	0	0	0	0	0	0	0	0	0	0	0	0	0	0	0	0	0	23.9511
fabp4	chr3_10206088_10206117	44.3909	309.407	319.327	285.573	213.3	0	50.9907	0	343.52	0	0	0	0	0	0	0	0	0.481508	0	0	452.214	0	0	29.8941	44.5235	0	0	0.513151	0	0	0	0	0	0	0	0	0	0	0	0	0	0	150.679	151.097	148.687	23.9511
pcdh9	chr14_93888491_93888520	44.3909	220.932	206.647	281.464	98.4917	0	0	0	0	0	0	0	0	0	0	0	0	0	0	0	190.991	117.228	109.843	0	0.247353	0	0	0	0	0	0	0	0	0	0	0	0	0	0	0	0	0	0	0	49.5625	0
atp13a5	chr16_29314502_29314531	44.3909	268.494	186.356	73.9612	94.7565	9.32726	0	0	68.704	0	0	0	0	0	0	0	0	0	0.588496	0	233.176	117.228	109.843	0	0	0	0	0	0	0	0	0	0	0	0	0	0	0	0	0	0	0	0	0	0	0
slc16a12	chr19_34674841_34674870	44.3909	74.9226	79.7826	47.253	58.5839	0	50.9907	0	68.704	0	0	0	0	0	0	0	0	0	0.588496	0	87.3831	0	0	29.8941	0	0	0	0	0	0	0	0	0	0	0	0	0	0	0	0	0	0	75.3397	0	0	0
ccar2	chr14_70141992_70142021	44.3909	51.6531	108.741	27.8496	129.75	9.32726	4895.11	0	0	0	0	0	0	0	0	0	0	0	0	0	171.985	0	0	0	0.247353	0	52.1114	0	0	0	1.12005	72.9928	0	0	0	0	0	0	0	0	0	0	0	37.7742	148.687	23.9511
tpo	chr12_30103074_30103103	44.3909	197.918	170.4	382.818	258.123	9.32726	0	0	0	0	0	0	0	0	0	0	0	0	0	0	185.892	0	0	29.8941	0	0	104.223	0	0	0	0	0	0	0	0	0	0	0	0	0	0	0	150.679	0	99.1249	71.8532
lrrc2	chr9_110970059_110970088	44.3909	56.0002	83.1315	47.253	52.0964	0	0	0	0	0	0	0	0	0	0	0	0	0	0	0	134.899	0	0	0	0.247353	0.257055	52.1114	0	0	0	0	0	0	0	0	0	0	0	0	0	0	0	150.679	0	49.5625	0
nbas	chr12_13310207_13310236	44.3909	151.124	169.021	3.88068	49.7373	0	0	0	0	0	0	0	0	0	0	0	0	0	0	0	114.966	117.228	0	0	7.66793	0	0	0	0	0	0	0	0	0	0	0	0	0	0	0	0	0	0	0	0	23.9511
clca4a	chr3_144974957_144974986	88.7818	157.261	222.012	143.357	93.7736	0	0	0	0	0	0	0	0	0	0	0	0	0	0	0	241.521	0	109.843	29.8941	26.2194	0.257055	52.1114	0	0	0	0	0	0	0	0	0	0	0	0	0	0	0	0	0	49.5625	0
gpc3	chrX_52388148_52388177	88.7818	206.357	225.361	195.404	133.485	9.32726	0	0	0	0	0	0	0	0	0	0	0	0	0	0	205.826	117.228	0	0	0.494705	0	0	0	0	0	0	0	0	0	0	0	0	0	0	0	0	0	0	0	0	0
b3galt1	chr2_68118225_68118254	44.3909	90.0094	166.263	113.453	16.1204	0	0	0	0	0	0	0	0	0	0	0	0	0	0	0	163.177	0	0	0	0.247353	0	0	0	0	0	0	0	0	0	0	0	0	0	0	0	0	0	0	37.7742	99.1249	23.9511
nrxn1	chr17_90643075_90643104	44.3909	121.462	122.727	110.485	200.326	0	0	0	0	0	0	0	0	0	0	0	0	0	0	0	219.501	117.228	0	0	0	0.257055	104.223	0	0	0	0	0	0	0	0	0	0	0	0	0	0	0	75.3397	0	49.5625	23.9511
hpse2	chr19_42913174_42913203	88.7818	232.439	165.672	79.8964	142.725	9.32726	0	0	0	0	0	0	0	0	0	0	0	0.481508	0.588496	0	319.632	0	0	59.7881	0	0.257055	0	0.256576	0	0	0	0	0	0	0	0	0	0	0	0	0	0	301.359	0	49.5625	47.9021
ptch1	chr13_63523071_63523100	88.7818	118.137	136.517	34.4696	114.416	0	0	0	0	0	0	0	0	0	0	0	0	0	0	0	172.448	117.228	0	0	460.323	0	104.223	0.769727	96.1845	0	0	0	0	0	0	0	0	0	0	0	0	0	0	0	0	0
cacna1d	chr14_30042783_30042812	44.3909	289.973	113.469	366.61	112.056	0	0	0	137.408	0	0	0	0	0	0	0	0	0	0	0	284.864	117.228	0	29.8941	0	0	52.1114	0	0	0	0	0	0	0	0	0	0	0	0	0	0	0	301.359	75.5484	0	71.8532
dst	chr1_33908272_33908301	44.3909	210.704	234.423	419.342	164.546	9.32726	0	0	0	0	0	0	0	0	0	0	0	0.481508	0	0	276.288	117.228	0	59.7881	0	0	156.334	0	0	0	0	0	0	0	0	0	0	0	0	0	0	0	75.3397	37.7742	0	0
marco	chr1_120492077_120492106	44.3909	437.517	495.243	352.686	344.426	18.6545	50.9907	0	0	0	0	0	0	0	0	0	0	0.963017	0	0	347.215	0	0	29.8941	0	0.257055	104.223	0.256576	0	0	0	0	0	0	0	0	0	0	0	0	0	0	75.3397	75.5484	99.1249	23.9511
tenm2	chr11_36047322_36047351	44.3909	188.201	115.242	101.354	67.2339	0	0	0	0	0	0	0	0	0	0	0	0	0	0	0	138.84	0	109.843	89.6822	0	0	104.223	0	0	0	0	0	0	0	0	0	0	0	0	0	0	0	75.3397	0	0	0
smyd1	chr6_71235331_71235360	44.3909	223.745	148.534	425.962	357.008	0	0	0	68.704	0	0	0	0	0	0	0	0	0	0	0	262.613	234.456	0	29.8941	0.247353	0.514109	156.334	137.268	0	0	0	0	0	0	0	0	0	0	0	0	0	0	226.019	113.323	49.5625	47.9021
stag2	chrX_42234652_42234681	44.3909	132.968	226.937	62.0909	519.588	0	0	0	0	0	0	0	0	0	0	0	0	0	0	0	202.117	117.228	0	0	0.247353	0	0	0	0	0	0	0	0	0	0	0	0	0	0	0	0	0	150.679	0	99.1249	47.9021
lonp1	chr17_56622453_56622482	44.3909	215.818	374.88	38.8068	43.6431	0	0	0	0	0	0	0	0	0	0	0	0	0	0	0	437.148	234.456	109.843	59.7881	196.151	0.257055	104.223	0.513151	865.66	0	0	0	0	0	0	0	0	0	0	0	0	0	0	37.7742	0	0
csf3	chr11_98701592_98701621	88.7818	376.403	290.369	1241.82	211.728	18.6545	0	0	68.704	0	0	0	0	0	0	0	0	0	0.588496	0	248.706	234.456	219.687	29.8941	0.247353	0	0	0.256576	0	0	0	0	0	0	0	0	0	0	0	0	0	0	301.359	75.5484	346.937	119.755
irx1	chr13_71963283_71963312	44.3909	169.79	251.167	85.8316	230.6	0	0	0	137.408	0	0	0	0	0	0	0	0	0	0	0	241.057	0	0	0	0	0	0	0.256576	0	0	0	0	0	0	0	0	0	0	0	0	0	0	0	0	0	47.9021
casq2	chr3_102113105_102113134	44.3909	174.137	141.048	68.2544	507.4	0	101.981	0	0	0	0	0	0	0	0	0	0	0.481508	0	0	294.599	1289.51	0	0	0	0	104.223	0.513151	192.369	0	1.12005	0	0	0	0	0	0	0	0	0	0	0	0	113.323	0	0
d7ertd443e	chr7_134349528_134349557	44.3909	276.421	206.844	217.547	321.032	9.32726	0	0	68.704	0	0	0	0	0	0	0	0	0	0.588496	0	184.733	0	0	29.8941	0	0	0	0	0	0	0	0	0	0	0	0	0	0	0	0	0	0	0	0	148.687	95.8043
rergl	chr6_139500732_139500761	44.3909	90.2651	114.454	26.48	38.9249	0	0	0	0	0	0	0	0	0	0	0	0	0	0.588496	0	141.621	0	109.843	29.8941	0	0	52.1114	0	0	0	0	0	0	0	0	0	0	0	0	0	0	0	0	0	0	0
hba-a1	chr11_32284264_32284293	88.7818	305.572	511.988	409.07	370.573	0	0	0	68.704	0	0	0	0	0	0	0	0	0	0	0	474.233	0	0	89.6822	43.0394	0.257055	0	0.256576	0	0	0	0	0	0	0	0	0	0	0	0	0	0	150.679	75.5484	49.5625	23.9511
mapk4	chr18_73933987_73934016	44.3909	347.764	295.294	515.903	462.38	0	0	0	0	0	0	0	0	0	0	0	0	0.481508	0	0	350.228	117.228	0	59.7881	49.7179	34.1883	0	0	0	0	0	0	0	0	0	0	0	0	0	0	0	0	226.019	113.323	99.1249	71.8532
inmt	chr6_55173453_55173482	44.3909	203.033	367.985	97.7019	224.899	0	50.9907	0	0	0	0	0	0	0	0	0	0	0	0	0	398.208	0	0	0	0	0	104.223	0	0	0	0	0	0	0	0	0	0	0	0	0	0	0	150.679	0	99.1249	0
ces1g	chr8_93333668_93333697	44.3909	138.338	155.625	110.714	99.0815	0	0	0	68.704	0	0	0	0	0	0	0	0	0	0	0	102.681	0	0	29.8941	0	0	0	0	0	0	0	0	0	0	0	0	0	0	0	0	0	0	0	37.7742	0	0
lvrn	chr18_46850433_46850462	44.3909	320.403	189.114	173.489	33.2238	9.32726	0	0	68.704	0	0	0	0	0	0	0	0	0	0.588496	0	174.766	0	109.843	29.8941	0.247353	0	0	0	0	0	0	0	0	0	0	0	0	0	0	0	0	0	0	0	0	23.9511
dact2	chr17_14198028_14198057	44.3909	246.503	266.927	227.819	69.1998	0	0	0	137.408	0	0	0	0	0	0	0	0	0.481508	0	0	291.586	117.228	0	0	0	0	104.223	0	0	0	0	0	0	0	0	0	0	0	0	0	0	0	0	37.7742	49.5625	47.9021
pygm	chr19_6388124_6388153	44.3909	265.937	231.665	290.138	512.904	9.32726	0	6.8636	0	0	0	0	0	0	0	0	0	0.481508	0	0	342.115	117.228	109.843	119.576	3.46294	0.257055	0	0.513151	0	0	0	0	0	0	0	0	17.6688	0	0	0	0	0	301.359	0	99.1249	23.9511
rara	chr11_98970170_98970199	44.3909	49.8631	71.9028	43.1441	6.88066	0	0	0	0	0	0	0	0	0	0	0	0	0	0	0	29.6685	234.456	0	29.8941	160.779	0	52.1114	0	0	0	0	0	0	0	0	0	0	0	0	0	0	0	0	0	49.5625	23.9511
mrps24	chr11_5707323_5707352	88.7818	138.338	278.353	9.81584	122.869	0	0	0	68.704	0	0	0	0	0	0	0	0	0	0	0	351.155	0	3185.46	0	0	0.257055	52.1114	0	0	0	0	0	0	0	0	0	0	0	0	0	0	0	0	0	49.5625	0
hhatl	chr9_121789806_121789835	44.3909	283.325	153.458	294.247	310.023	9.32726	0	0	137.408	0	0	0	0	0	0	0	0	0	0.588496	0	327.049	117.228	0	0	0.247353	0	52.1114	0	0	0	0	0	0	0	0	0	0	0	0	0	0	0	0	37.7742	49.5625	47.9021
card11	chr5_140906612_140906641	44.3909	376.147	358.923	223.025	447.833	0	50.9907	0	137.408	0	0	0	0	0	0	0	0	0.481508	0.588496	0	365.294	0	0	29.8941	0.247353	0.257055	52.1114	0.513151	0	0	0	0	0	0	0	0	0	0	0	0	0	0	226.019	37.7742	0	119.755
ryr1	chr7_29101810_29101839	44.3909	156.494	162.52	110.029	100.851	9.32726	0	0	0	0	0	0	0	0	0	0	0	0	0	0	86.6878	0	0	0	0	0	0	0	0	0	1.12005	218.978	0	17.2436	0	0	0	0	0	0	0	0	150.679	0	49.5625	23.9511
pi16	chr17_29326286_29326315	44.3909	274.119	260.032	175.316	398.882	0	0	0	0	0	0	0	0	0	0	0	0	0.481508	0	0	219.269	0	0	59.7881	33.1453	0	0	0.256576	0	0	0	0	0	0	0	0	0	0	0	0	0	0	0	0	0	0
mdn1	chr4_32723675_32723704	88.7818	60.6029	188.72	42.6875	0	0	0	0	0	0	0	0	0	0	0	0	0	0	0	0	96.8864	0	0	0	0	0	0	0	0	0	0	0	0	0	0	0	0	0	0	0	0	0	75.3397	0	0	0
mybpc1	chr10_88542386_88542415	44.3909	164.932	238.166	188.556	130.733	0	0	0	0	0	0	0	0	0	0	0	0	0	0	0	95.2639	0	0	0	0	0	0	0	0	0	0	0	0	0	0	0	0	0	0	0	0	0	75.3397	37.7742	49.5625	23.9511
zfhx3	chr8_108947137_108947166	44.3909	133.991	132.183	59.1233	100.851	0	50.9907	0	0	0	0	0	0	0	0	0	0	0	0	0	161.786	0	0	0	0	0.257055	0	0.256576	0	0	0	0	0	0	0	0	0	0	0	0	0	0	0	37.7742	0	0
acsm5	chr7_119535797_119535826	44.3909	20.9681	72.2968	20.5448	37.3522	0	0	3.4318	68.704	0	0	0	0	0	0	0	0	0	0	765.453	127.946	234.456	0	0	0	0.257055	156.334	0	0	0	0	0	0	0	0	0	35.3375	0	0	0	0	0	0	0	0	0
brca2	chr5_150541650_150541679	44.3909	45.0047	108.347	16.6641	9.23974	0	0	0	0	0	0	0	0	0	0	0	0	0	0	0	43.8075	0	0	0	0	0	0	0	0	0	0	0	0	0	0	0	0	0	0	0	0	0	0	0	49.5625	23.9511
kdm5c	chrX_152242128_152242157	44.3909	208.147	103.225	118.475	72.1486	0	0	0	0	0	0	0	0	0	0	0	0	0	0	0	144.171	0	109.843	59.7881	0.494705	0.257055	156.334	544.197	0	0	0	0	0	0	0	0	0	0	0	0	0	0	0	0	0	0
car6	chr4_150197310_150197339	44.3909	123.251	134.153	44.0572	78.4395	0	0	0	0	0	0	0	0	0	0	0	0	0	0	0	91.5553	0	0	29.8941	0	0	0	0.256576	0	0	0	0	0	0	0	0	0	0	0	0	0	0	0	0	0	0
hif3a	chr7_17056425_17056454	88.7818	151.891	240.333	165.5	51.7033	0	0	0	0	0	0	0	0	0	0	0	0	0	0	0	223.905	117.228	0	29.8941	0.742058	0.257055	208.446	169.853	0	0	0	0	0	0	0	0	0	0	0	0	0	0	0	37.7742	49.5625	0
myh11	chr16_14246715_14246744	44.3909	185.9	198.964	625.246	157.862	0	0	0	68.704	0	0	0	0	0	0	0	0	0	0	0	145.561	0	0	0	0.247353	0	0	0	0	0	0	0	0	0	0	0	0	0	0	0	0	0	75.3397	37.7742	99.1249	95.8043
c1qtnf9	chr14_60779895_60779924	133.173	395.837	332.329	493.76	665.458	0	0	0	0	0	0	0	0	0	0	0	0	0	0.588496	0	249.401	468.911	0	29.8941	661.916	0.771164	156.334	0.769727	0	0	0	0	0	0	0	0	0	0	0	0	0	0	301.359	75.5484	247.812	71.8532
pten	chr19_32800013_32800042	44.3909	286.649	185.568	714.274	325.357	0	0	0	274.816	0	0	0	0	0	0	0	0	0	0	0	123.773	0	0	0	21.2723	0.257055	0	0	0	0	0	0	0	0	0	0	0	0	0	0	0	0	301.359	0	148.687	71.8532
scgb3a1	chr11_49663664_49663693	44.3909	152.402	312.827	66.8847	157.665	0	0	0	0	0	0	0	0	0	0	0	0	0	0	0	189.369	0	0	0	0	0.257055	52.1114	0	0	0	0	0	0	0	0	0	0	0	0	0	0	0	0	37.7742	0	119.755
ntf5	chr7_45415669_45415698	44.3909	188.457	227.725	286.029	497.373	9.32726	0	0	0	0	0	0	0	0	0	0	0	0.481508	0	0	266.322	0	0	0	0.494705	0	0	0.256576	0	0	0	0	0	0	0	0	0	0	0	0	0	0	75.3397	75.5484	0	95.8043
cntnap3	chr13_64772100_64772129	44.3909	203.544	184.386	33.3282	229.224	0	0	0	137.408	0	0	0	0	0	0	41572.7	0	0.481508	0	0	254.269	0	109.843	0	0	0	104.223	0	0	0	0	0	0	0	0	0	0	0	0	0	0	0	150.679	0	0	23.9511
rb1	chr14_73213024_73213053	44.3909	158.028	154.64	118.018	339.708	0	0	0	0	0	0	0	0	0	0	0	0	1.44453	0.588496	0	345.824	117.228	0	29.8941	0	0.514109	156.334	0	0	0	0	0	0	0	0	0	0	0	0	0	0	0	75.3397	37.7742	49.5625	47.9021
esr1	chr10_4856857_4856886	44.3909	257.754	265.548	153.629	449.799	0	0	0	68.704	0	0	0	0	0	0	0	0	0.963017	0	0	209.766	117.228	109.843	29.8941	0.247353	0	52.1114	0	0	0	0	0	0	0	0	0	0	0	0	0	0	0	150.679	0	297.375	71.8532
clca4a	chr3_144968352_144968381	44.3909	173.626	158.383	89.2557	184.009	0	0	0	0	0	0	0	0	0	0	0	0	0	0	0	149.27	0	0	29.8941	0	0	0	0.256576	0	0	0	0	0	0	0	0	0	0	0	0	0	0	0	37.7742	0	23.9511
ptprq	chr10_107608143_107608172	88.7818	242.156	207.829	194.947	96.3293	0	0	0	0	0	0	0	0	0	0	0	0	0	0	0	149.038	0	0	0	0.247353	0	0	0.256576	0	0	0	0	0	0	0	0	0	0	0	0	0	0	75.3397	37.7742	99.1249	0
btnl9	chr11_49180603_49180632	88.7818	301.736	226.149	334.195	386.103	9.32726	0	0	206.112	0	0	0	0	0	0	0	0	0	0.588496	0	283.242	0	0	0	0	0	156.334	0.256576	0	0	0	0	0	0	0	0	0	0	0	0	0	0	75.3397	151.097	198.25	47.9021
cacna1d	chr14_30096964_30096993	88.7818	184.11	77.4187	817.911	62.3191	9.32726	0	0	0	0	0	0	0	0	0	0	0	0	0	0	144.866	0	219.687	0	0	0	52.1114	0	0	0	0	0	0	0	0	0	0	0	0	0	0	0	226.019	37.7742	148.687	119.755
sox10	chr15_79163610_79163639	44.3909	264.147	269.882	127.834	208.582	9.32726	0	0	0	0	0	0	0	0	0	0	0	0.963017	0	0	141.853	0	0	0	0	0	0	0.256576	0	0	0	0	0	0	0	0	0	0	0	0	0	0	0	0	99.1249	47.9021
lcn10	chr2_25682803_25682832	44.3909	147.288	145.382	395.145	96.1327	9.32726	0	0	0	0	0	0	0	0	0	0	0	0.963017	0	0	195.859	234.456	0	29.8941	266.151	0	156.334	52.3414	0	0	0	0	0	0	0	0	0	0	0	0	0	0	0	113.323	49.5625	0
plcg1	chr2_160731988_160732017	44.3909	515.508	370.152	340.13	511.135	0	50.9907	0	137.408	0	0	0	0	0	0	0	0	0.481508	0	0	451.286	0	109.843	209.259	38.587	0.257055	0	1.28288	0	0	0	0	0	0	0	0	0	0	0	0	0	0	226.019	37.7742	49.5625	71.8532
kcnj16	chr11_111024895_111024924	44.3909	252.64	313.615	290.595	392.984	0	50.9907	0	68.704	0	0	0	0	0	0	0	0	0	0.588496	0	359.499	0	109.843	59.7881	0	0	208.446	0.256576	96.1845	0	0	0	0	0	0	0	0	0	0	0	0	0	301.359	113.323	99.1249	23.9511
dcc	chr18_71378855_71378884	44.3909	37.3334	52.2034	37.8937	248.883	0	0	0	0	0	0	0	0	0	0	0	0	0	0	0	26.1918	0	0	29.8941	15.0885	0	0	0	0	0	0	0	0	0	0	0	0	0	0	0	0	0	0	0	49.5625	0
capn6	chrX_143805573_143805602	88.7818	244.457	212.557	152.488	108.714	0	0	0	68.704	0	0	0	0	0	0	0	0	0	0	0	218.11	0	0	0	1.48412	0.257055	260.557	622.196	0	0	0	0	0	0	0	0	0	0	0	0	0	0	150.679	37.7742	49.5625	0
cyc1	chr15_76344620_76344649	44.3909	81.0596	277.959	0.228275	51.5067	0	0	0	68.704	0	0	0	0	0	0	0	0	0.481508	0	0	263.077	0	109.843	0	0	0	52.1114	0.513151	0	0	0	0	0	0	0	0	0	0	0	0	0	0	75.3397	0	49.5625	23.9511
sox10	chr15_79159356_79159385	44.3909	60.6029	101.452	77.6137	46.1987	0	0	0	68.704	0	0	0	0	0	0	0	0	0	1.17699	0	101.754	0	0	0	0	0	0	0	0	0	0	0	0	0	0	0	0	0	0	0	0	0	0	0	0	0
hoxa5	chr6_52204115_52204144	44.3909	581.225	414.87	284.203	339.511	9.32726	0	0	206.112	0	0	0	0	0	0	0	0	0	0	0	352.778	0	0	0	0.494705	0.257055	156.334	0.256576	480.922	0	0	0	0	0	0	0	0	0	0	0	0	0	150.679	113.323	99.1249	23.9511
kdm6a	chrX_18163122_18163151	44.3909	241.9	291.354	252.244	77.26	0	0	0	68.704	0	0	0	0	0	0	0	0	0	0	0	206.289	0	0	0	0	0	52.1114	0	0	0	0	0	0	0	0	0	0	0	0	0	0	0	75.3397	37.7742	148.687	47.9021
rdh5	chr10_128918531_128918560	44.3909	186.156	253.334	273.474	92.3974	0	0	0	0	0	0	0	0	0	0	0	0	0.481508	0	0	158.773	0	0	0	0	0.257055	52.1114	0	0	0	0	0	0	0	0	0	0	0	0	0	0	0	0	0	99.1249	47.9021
kcnj16	chr11_111025191_111025220	44.3909	188.201	195.615	189.24	224.899	0	0	0	0	0	0	0	0	0	0	0	0	0	0	0	282.315	0	0	0	0	0.257055	104.223	0	0	0	0	0	0	0	0	0	0	0	0	0	0	0	150.679	37.7742	99.1249	71.8532
frem1	chr4_83001696_83001725	88.7818	309.407	191.872	122.356	259.106	0	0	0	0	0	0	0	0	0	0	0	0	0	0.588496	0	388.473	351.683	0	0	0	0	104.223	0.256576	0	0	0	0	0	0	0	0	0	0	0	0	0	0	0	113.323	0	23.9511
d7ertd443e	chr7_134348920_134348949	44.3909	87.708	230.089	128.976	145.084	0	0	0	0	0	0	0	0	0	0	0	0	0	0	0	107.317	117.228	0	29.8941	0.247353	0	0	0	0	0	0	0	0	0	0	0	0	0	0	0	0	0	75.3397	37.7742	49.5625	0
n4bp2	chr5_65790786_65790815	44.3909	198.174	170.794	190.382	91.4145	0	0	0	0	0	0	0	0	0	0	0	0	0	1.17699	0	191.687	0	0	0	42.05	0	1250.67	0	0	0	0	0	0	0	0	0	0	0	0	0	0	0	75.3397	75.5484	0	23.9511
mab21l1	chr3_55783517_55783546	44.3909	346.996	223.194	218.688	490.296	9.32726	0	0	0	0	0	0	0	0	0	0	0	0	0	0	174.998	0	0	0	0.247353	0	0	0	0	0	0	0	0	0	0	0	0	0	0	0	0	0	226.019	0	99.1249	23.9511
cidec	chr6_113425643_113425672	44.3909	175.927	171.385	601.962	138.793	0	0	0	0	0	0	0	0	0	0	0	0	0.481508	0	0	227.845	0	0	0	0.494705	0	104.223	0.256576	0	0	0	0	0	0	0	0	0	0	0	0	0	0	226.019	37.7742	148.687	47.9021
adamts5	chr16_85899204_85899233	44.3909	150.868	114.651	162.989	327.519	0	0	0	0	0	0	0	0	0	0	0	0	0	0	0	181.024	117.228	0	0	0	0	52.1114	0	0	0	0	0	0	0	0	0	0	0	0	0	0	0	0	0	49.5625	0
cntnap2	chr6_46001176_46001205	44.3909	145.242	176.901	160.249	90.0384	0	0	0	0	0	0	0	0	0	0	0	0	0.481508	0	0	224.832	234.456	0	0	0	0.514109	52.1114	0	0	0	0	0	0	0	0	0	0	0	0	0	0	0	226.019	0	49.5625	0
mrgprb4	chr7_48198689_48198718	88.7818	475.106	380.987	323.238	241.413	9.32726	0	0	137.408	0	0	0	0	0	0	0	0	0	1.17699	0	462.644	117.228	219.687	89.6822	0.494705	1183.99	104.223	0.513151	96.1845	0	0	0	0	0	0	0	0	0	0	0	0	0	150.679	0	49.5625	47.9021
fat1	chr8_45024087_45024116	44.3909	274.375	385.517	303.606	528.042	0	0	0	0	0	0	0	0	0	0	0	0	0	0.588496	0	234.567	117.228	109.843	29.8941	0	0.257055	0	0	0	0	0	0	0	0	0	0	0	0	0	0	0	0	0	0	99.1249	0
pck1	chr2_173153520_173153549	44.3909	135.781	141.245	127.378	191.086	0	0	0	68.704	0	0	0	0	0	0	0	0	0	0	0	141.157	0	0	0	0	0	104.223	0	0	0	0	0	0	0	0	0	0	0	0	0	0	0	150.679	37.7742	99.1249	23.9511
scn4a	chr11_106337158_106337187	44.3909	51.3974	29.7461	45.8834	14.1545	0	0	0	0	0	0	0	0	0	0	0	0	0	0	0	20.1653	117.228	0	0	0	0	52.1114	0	0	0	0	0	0	0	0	0	0	0	0	0	0	0	0	0	0	0
rergl	chr6_139493426_139493455	44.3909	192.293	327.798	313.422	253.012	0	0	0	0	0	0	0	0	0	0	0	0	0	0	0	372.711	0	0	29.8941	0.494705	0	0	0	0	0	0	0	0	0	0	0	0	0	0	0	0	0	150.679	0	49.5625	23.9511
ryr2	chr13_11759827_11759856	88.7818	139.873	221.815	79.8964	225.096	9.32726	0	0	0	0	0	0	0	0	0	0	0	0	0	0	252.878	351.683	0	89.6822	289.155	0.771164	0	0.256576	0	0	0	0	0	0	0	0	0	0	0	0	0	0	226.019	0	0	47.9021
fabp7	chr10_57785581_57785610	88.7818	199.453	100.664	108.659	51.5067	18.6545	101.981	0	0	0	0	0	0	0	0	0	0	0	0	0	233.408	351.683	0	29.8941	0	0	0	0	0	0	0	0	0	0	0	0	0	0	0	0	0	0	0	0	0	0
thrsp	chr7_97417324_97417353	44.3909	41.1691	77.6157	36.2958	56.8146	0	50.9907	0	0	0	0	0	0	0	0	0	0	0	0	0	55.165	0	0	0	0	0.257055	0	0	0	0	0	0	0	0	0	0	0	0	0	0	0	0	0	37.7742	49.5625	23.9511
slc7a10	chr7_35198655_35198684	44.3909	152.402	264.169	109.8	280.928	0	0	0	0	0	0	0	0	0	0	0	0	0.481508	0	0	231.554	0	0	29.8941	0	0	0	0	0	0	0	0	0	0	0	0	0	0	0	0	0	0	0	37.7742	99.1249	47.9021
atp13a5	chr16_29297370_29297399	88.7818	291.763	296.082	314.564	554.974	0	0	0	206.112	0	0	0	0	0	0	0	0	0.481508	0.588496	0	254.269	0	109.843	0	26.4667	0	0	0.256576	0	0	0	0	0	0	0	0	0	0	0	0	0	0	226.019	37.7742	36527.5	47.9021
ano3	chr2_110783681_110783710	44.3909	160.841	136.517	105.692	389.839	0	0	0	68.704	0	0	0	0	0	0	0	0	0	0	0	203.508	0	109.843	0	0	0	0	0	0	0	0	0	0	0	0	0	0	0	0	0	0	0	75.3397	151.097	49.5625	23.9511
ropn1	chr16_34671157_34671186	44.3909	396.86	398.913	296.53	348.555	0	50.9907	0	68.704	0	0	0	0	0	0	0	0	0	0	0	440.856	0	109.843	59.7881	21.767	0	52.1114	0.513151	0	0	0	0	0	0	0	0	0	0	0	0	0	0	75.3397	0	49.5625	71.8532
pcolce2	chr9_95670057_95670086	88.7818	191.781	301.992	100.669	484.988	0	0	0	343.52	0	0	0	0	0	0	0	0	0	0	0	231.09	0	0	29.8941	0	0	0	0.256576	0	0	0	0	0	0	0	0	0	0	0	0	0	0	226.019	75.5484	148.687	71.8532
agmo	chr12_37406015_37406044	44.3909	98.192	109.726	126.693	127.391	0	0	0	68.704	0	0	0	0	0	0	0	0	0.481508	0	0	75.0985	0	0	0	0	20.5644	0	0	0	0	0	0	0	0	0	0	0	0	0	0	0	0	75.3397	0	49.5625	0
adcyap1r1	chr6_55474559_55474588	88.7818	93.845	126.667	99.5281	24.967	0	0	0	0	0	0	0	0	0	0	0	0	0.481508	0	0	156.455	0	0	0	0	0	0	0	0	0	0	0	0	0	0	0	0	0	0	0	0	0	75.3397	37.7742	49.5625	0
1700019d03rik	chr1_52925436_52925465	88.7818	130.411	200.54	180.109	393.574	0	0	0	68.704	0	0	0	0	0	0	0	0	0	0	0	249.401	0	0	0	76.9267	0	0	0	0	0	0	0	0	0	0	0	0	0	0	0	0	0	75.3397	0	49.5625	23.9511
mrgprb5	chr7_48168793_48168822	44.3909	173.882	185.568	69.1675	23.1977	1315.14	50.9907	0	0	0	0	0	0	0	0	0	0	2052.19	1.76549	0	139.767	0	0	29.8941	105.867	0	104.223	0	0	0	0	0	0	0	0	0	0	0	0	0	0	0	150.679	37.7742	49.5625	0
polq	chr16_37061870_37061899	44.3909	114.302	91.6022	34.2413	200.326	0	0	0	0	0	0	0	0	0	0	0	0	0	0	0	104.767	0	0	0	149.896	0	104.223	0	0	0	0	0	0	0	0	0	0	0	0	0	0	0	75.3397	0	99.1249	23.9511
lgr6	chr1_134988109_134988138	44.3909	167.489	55.5523	288.768	198.556	9.32726	0	0	0	0	0	0	0	0	0	0	0	0	0	0	73.2442	0	0	0	0	0	52.1114	0	0	0	0	0	0	0	0	0	0	0	0	0	0	0	226.019	37.7742	99.1249	23.9511
adcy5	chr16_35248825_35248854	44.3909	173.115	230.877	222.112	349.931	0	0	0	0	0	0	0	0	0	0	0	0	0	0.588496	0	305.493	0	219.687	0	0	0	0	0.256576	0	0	0	0	0	0	0	0	0	0	0	0	0	0	75.3397	151.097	49.5625	47.9021
fat1	chr8_45023357_45023386	44.3909	211.215	190.69	84.2336	156.879	0	0	0	137.408	0	0	0	0	0	0	0	0	0	0	0	225.296	0	0	29.8941	0	67.8624	52.1114	0.256576	0	0	0	0	0	0	0	0	0	0	0	0	0	0	0	37.7742	49.5625	47.9021
4932438a13rik	chr3_36988215_36988244	44.3909	147.288	195.221	116.649	39.3181	9.32726	50.9907	0	68.704	0	0	0	0	0	0	0	0	0.481508	0	0	193.541	3985.74	0	837.034	0.247353	0.257055	0	0.256576	144.277	0	0	0	0	0	0	0	0	0	0	0	0	0	0	0	49.5625	23.9511
zfp142	chr1_74573539_74573568	88.7818	186.667	178.083	147.922	21.0352	0	50.9907	0	137.408	0	0	0	0	0	0	0	0	0	0	0	202.349	0	109.843	0	0	0	0	0	0	0	0	0	0	0	0	0	0	0	0	0	0	0	0	37.7742	0	23.9511
clec4g	chr8_3718334_3718363	266.345	162.119	151.291	207.046	98.6883	0	0	0	0	0	0	0	0	0	0	0	0	0	0	0	188.21	0	109.843	0	1035.42	0	208.446	0.513151	0	0	0	0	0	0	0	0	0	0	0	0	0	0	0	113.323	49.5625	0
crebbp	chr16_4084696_4084725	44.3909	185.389	190.493	54.5578	131.519	0	0	0	68.704	0	0	0	0	0	0	0	0	0	0	0	184.038	0	0	29.8941	0	82.5145	0	0	0	0	0	0	0	0	0	0	0	0	0	0	0	0	0	0	49.5625	23.9511
flt4	chr11_49642217_49642246	44.3909	185.133	215.906	177.827	59.7635	9.32726	0	0	68.704	0	0	0	0	0	0	0	0	0	0	0	228.772	117.228	109.843	59.7881	0	0	104.223	0	0	0	0	0	0	0	0	0	0	0	0	0	0	0	0	37.7742	0	95.8043
pi16	chr17_29327425_29327454	88.7818	303.015	340.997	161.619	366.248	0	50.9907	0	0	0	0	0	0	0	0	0	0	0	0.588496	0	244.07	0	0	0	0	0	0	0	0	0	0	0	0	0	0	0	0	0	0	0	0	0	75.3397	75.5484	99.1249	47.9021
spdef	chr17_27718050_27718079	44.3909	215.051	186.159	158.195	184.205	0	0	0	68.704	0	0	0	0	0	0	0	0	0.481508	1.17699	0	173.376	0	0	29.8941	0	0.257055	0	0	0	0	0	0	0	0	0	0	0	0	0	0	0	0	150.679	0	49.5625	0
mrgprb1	chr7_48447694_48447723	44.3909	247.526	265.942	111.855	191.086	9.32726	0	3.4318	0	0	0	0	0	0	0	0	0	0	0	0	208.839	0	109.843	0	0	0	0	0	0	0	0	0	0	0	0	0	0	0	0	0	0	0	75.3397	37.7742	99.1249	0
card11	chr5_140873415_140873444	88.7818	392.512	367	243.798	607.857	18.6545	0	0	68.704	0	0	0	0	0	0	0	0	1.44453	1.76549	0	356.486	0	0	0	0	0.257055	52.1114	0	0	0	0	0	0	0	0	0	0	0	0	0	0	0	75.3397	151.097	49.5625	47.9021
slco1a5	chr6_142250186_142250215	44.3909	352.111	198.176	408.385	331.648	0	0	0	68.704	0	0	0	0	0	0	0	0	0	0	0	294.136	117.228	0	89.6822	230.285	0.257055	0	0	0	0	0	0	0	0	0	0	0	0	0	0	0	0	0	113.323	49.5625	95.8043
acsm5	chr7_119531832_119531861	44.3909	189.224	226.149	68.4826	396.129	0	0	0	0	0	0	0	0	0	0	0	0	0.481508	0	0	386.85	0	0	89.6822	130.355	0.257055	104.223	0	0	0	0	0	0	0	0	0	0	0	0	0	0	0	0	37.7742	148.687	23.9511
oca2	chr7_56327365_56327394	44.3909	131.946	183.795	118.247	26.3431	0	0	0	0	0	0	0	0	0	0	0	0	0.481508	0	0	267.249	234.456	0	0	0	0	156.334	0	0	0	0	0	0	0	0	0	0	0	0	0	0	0	0	113.323	0	0
alx4	chr2_93643009_93643038	44.3909	172.092	135.532	222.34	65.8578	9.32726	0	0	0	0	0	0	0	0	0	0	0	0	0.588496	0	122.383	0	109.843	29.8941	9.64675	0	0	0	0	0	1.12005	145.986	0	0	0	0	0	0	0	0	0	0	150.679	37.7742	99.1249	23.9511
fras1	chr5_96700197_96700226	44.3909	215.818	269.882	166.413	475.552	9.32726	50.9907	0	68.704	0	0	0	0	0	0	0	0	0.481508	0	0	259.6	0	0	0	0.247353	0.514109	104.223	0	0	0	0	0	0	0	0	0	0	0	0	0	0	0	0	75.5484	49.5625	0
clca4b	chr3_144915439_144915468	44.3909	160.585	189.114	21.2296	31.0613	0	0	0	68.704	0	0	0	0	0	0	0	0	0	0	0	104.535	0	0	0	0	0	0	0	0	0	0	0	0	0	0	0	0	0	0	0	0	0	75.3397	37.7742	0	23.9511
cfd	chr10_79891536_79891565	44.3909	348.531	296.476	337.163	1026.99	27.9818	0	0	68.704	0	0	0	0	0	0	0	0	0	0	0	390.559	0	0	0	96.9622	0	104.223	0	0	0	0	0	0	0	0	0	0	0	0	0	0	0	75.3397	75.5484	49.5625	23.9511
alx4	chr2_93668514_93668543	88.7818	206.101	111.499	252.701	136.434	9.32726	0	0	68.704	0	0	0	0	0	0	0	0	0.963017	0	0	181.256	117.228	0	29.8941	0	0	0	0	0	0	0	0	0	0	0	0	0	0	0	0	0	0	0	75.5484	0	0
lrp1b	chr2_40919204_40919233	88.7818	132.968	191.872	178.74	82.3713	0	0	0	0	0	0	0	0	0	0	0	0	0	0	0	333.308	234.456	109.843	89.6822	0	0	52.1114	0	0	0	0	0	0	0	0	0	0	0	0	0	0	0	0	37.7742	0	23.9511
prrt4	chr6_29177181_29177210	44.3909	106.119	289.975	16.8924	69.3964	0	0	0	68.704	0	0	0	0	0	0	0	0	0	0	0	108.012	117.228	109.843	0	34.6294	96.3954	52.1114	0.256576	0	0	0	0	0	0	0	0	0	0	0	0	0	0	150.679	75.5484	0	23.9511
arhgap5	chr12_52542551_52542580	44.3909	224.256	341.391	100.213	98.4917	18.6545	0	0	0	0	0	0	0	0	0	0	0	0	0.588496	0	197.713	351.683	0	0	0	0.257055	0	0.256576	0	0	0	0	0	0	0	0	0	0	0	0	0	0	75.3397	37.7742	0	71.8532
c1qtnf9	chr14_60779294_60779323	44.3909	283.581	214.921	233.982	276.209	18.6545	0	0	137.408	0	0	0	0	0	0	0	0	0	0.588496	0	234.567	0	109.843	29.8941	0	0	0	0	0	0	0	0	0	0	0	0	0	0	0	0	0	0	0	0	49.5625	0
mfap4	chr11_61487220_61487249	44.3909	219.654	173.946	429.386	217.822	0	0	0	0	0	0	0	0	0	0	0	0	0	0	0	168.972	0	0	0	0	0	0	0	0	0	0	0	0	0	0	0	0	0	0	0	0	0	226.019	37.7742	49.5625	95.8043
nrg2	chr18_36196690_36196719	44.3909	378.193	355.968	412.722	403.6	3273.87	10453.1	0	13809.5	0	0	0	0	0	0	0	0	485111	118.876	0	233.408	0	109.843	29.8941	0	0	0	0.256576	0	0	0	0	0	0	0	0	0	0	0	0	0	0	301.359	37.7742	4460.62	71.8532
gys2	chr6_142463342_142463371	88.7818	223.489	196.403	178.968	199.932	9.32726	0	0	0	0	0	0	0	0	0	0	0	0	0	0	265.163	0	109.843	0	46.7497	0.514109	0	0.256576	0	0	0	0	0	0	0	0	0	0	0	0	0	0	0	75.5484	49.5625	71.8532
mrgprb8	chr7_48388906_48388935	88.7818	157.772	115.045	201.795	248.097	0	0	0	0	0	0	0	0	0	0	0	0	0	0	0	124.005	117.228	109.843	29.8941	0	0	156.334	0.256576	144.277	0	0	0	0	0	0	0	0	0	0	0	0	0	150.679	37.7742	0	47.9021
tufm	chr7_126488253_126488282	44.3909	83.1052	165.672	0	57.7976	0	50.9907	0	68.704	0	0	0	0	0	0	0	0	0	0	0	117.052	0	0	0	0	0.257055	0	0	0	0	0	0	0	0	0	0	0	0	0	0	0	0	0	37.7742	0	23.9511
trhde	chr10_114801088_114801117	44.3909	257.754	259.244	117.79	201.112	9.32726	0	0	68.704	0	0	0	0	0	0	0	0	0	0	0	375.029	0	0	29.8941	74.4532	0.514109	156.334	0	0	0	1.12005	0	0	0	0	0	0	0	0	0	0	0	0	0	198.25	71.8532
alb	chr5_90468563_90468592	44.3909	224.256	209.996	178.74	87.4827	9.32726	0	0	0	0	0	0	0	0	0	0	0	0	0	0	172.912	0	0	0	0	0	0	0.256576	0	0	0	0	0	0	0	0	0	0	0	0	0	0	75.3397	37.7742	0	0
n4bp2	chr5_65807116_65807145	88.7818	259.544	125.288	140.389	296.655	18.6545	50.9907	0	68.704	0	0	0	0	0	0	0	0	0	0.588496	0	198.177	0	0	29.8941	0	0.257055	52.1114	0.256576	0	0	0	0	0	0	0	0	0	0	0	0	0	0	75.3397	0	99.1249	23.9511
ptpn13	chr5_103565151_103565180	44.3909	429.079	304.553	457.692	179.487	0	0	0	68.704	0	0	0	0	0	0	0	0	0	0	0	205.13	0	0	0	14.3465	0	52.1114	0.256576	0	0	0	0	0	0	0	0	0	0	0	0	0	0	150.679	151.097	198.25	47.9021
adipoq	chr16_23157172_23157201	44.3909	160.585	175.325	148.607	244.165	9.32726	0	0	0	0	0	0	0	0	0	0	0	0	0	0	252.646	0	0	0	0	0	0	0	0	0	0	0	0	0	0	0	0	0	0	0	0	0	301.359	0	99.1249	23.9511
krt5	chr15_101710761_101710790	88.7818	37.8449	60.2802	34.013	51.1135	0	0	0	0	0	0	0	0	0	0	0	0	0	0	0	72.7807	0	0	0	34.1347	0	52.1114	0	0	0	0	0	0	0	0	0	0	0	0	0	0	0	0	37.7742	99.1249	0
ptchd3	chr11_121832102_121832131	44.3909	133.48	65.796	38.122	125.425	9.32726	0	0	0	0	0	0	0	0	0	0	0	0	0	0	128.409	0	0	0	0	0	104.223	0	0	0	0	0	0	0	0	0	0	0	0	0	0	0	0	37.7742	0	23.9511
sorbs1	chr19_40376822_40376851	88.7818	160.841	132.971	97.2453	302.356	0	0	0	68.704	0	0	0	0	0	0	0	0	0	0	0	239.203	117.228	0	0	0.247353	0.257055	52.1114	0	0	0	0	0	0	0	0	0	0	0	0	0	0	0	75.3397	0	49.5625	47.9021
krt5	chr15_101710267_101710296	44.3909	169.79	269.488	143.357	331.648	0	0	0	0	0	0	0	0	0	0	0	0	0.481508	0	0	184.038	0	219.687	29.8941	0.247353	0	0	0	0	0	0	0	0	0	0	0	0	0	0	0	0	0	75.3397	113.323	99.1249	23.9511
saa3	chr7_46715002_46715031	44.3909	461.554	429.644	272.333	242.789	3395.12	0	0	68.704	0	0	0	0	0	0	0	0	0.481508	0.588496	0	376.42	117.228	0	59.7881	0	0.257055	1511.23	0	0	0	0	0	0	0	0	0	0	0	0	0	0	0	75.3397	75.5484	99.1249	47.9021
lhcgr	chr17_88767284_88767313	88.7818	93.0779	97.7091	111.855	106.749	9.32726	0	0	68.704	0	0	0	0	0	0	0	0	0	0	0	81.1249	0	0	0	0	0	0	0	0	0	0	0	0	0	0	0	0	0	0	0	0	0	75.3397	0	49.5625	0
ephb1	chr9_102001749_102001778	44.3909	576.878	393.003	664.053	128.963	9.32726	101.981	0	0	0	0	0	0	0	0	0	0	0	0	0	432.744	0	0	89.6822	0	0.257055	52.1114	0	0	0	0	0	0	0	0	0	0	0	0	0	0	0	75.3397	75.5484	49.5625	47.9021
nmur1	chr1_86387586_86387615	44.3909	278.978	230.68	236.95	203.864	0	0	0	0	0	0	0	0	0	0	0	0	0	0	0	224.368	0	0	29.8941	0	0.257055	0	206.03	0	0	0	0	0	0	0	0	0	0	0	0	0	0	75.3397	37.7742	49.5625	47.9021
kmt2d	chr15_98859548_98859577	44.3909	98.7035	243.682	10.7289	66.2509	0	0	0	0	0	0	0	0	0	0	0	0	0	0	0	85.2971	117.228	0	0	0	0	0	0.256576	0	0	0	0	0	0	0	0	0	0	0	0	0	0	57710.2	37.7742	148.687	0
sostdc1	chr12_36317182_36317211	88.7818	150.101	141.442	344.696	108.321	0	0	0	0	0	0	0	0	0	0	0	0	0	0	0	62.1185	0	0	0	0	0	0	0	48.0922	0	0	0	0	0	0	0	0	0	0	0	0	0	75.3397	37.7742	49.5625	47.9021
atm	chr9_53510250_53510279	44.3909	114.046	188.917	55.9275	31.4545	0	50.9907	0	68.704	0	0	0	0	0	0	0	0	0	0	0	182.183	0	0	0	0	0	0	0	0	0	0	0	0	0	0	0	0	0	0	0	0	0	0	0	0	23.9511
gata3	chr2_9874786_9874815	133.173	380.494	277.368	193.578	43.2499	9.32726	0	0	274.816	0	0	0	0	0	0	0	0	0	0	0	355.559	4689.11	0	0	101.662	0	625.337	0	2981.72	0	0	0	0	0	0	0	0	0	0	0	0	0	150.679	188.871	99.1249	0
krt5	chr15_101711602_101711631	44.3909	435.983	468.058	741.21	493.245	9.32726	0	0	0	0	0	0	0	0	0	0	0	0.963017	0	0	287.414	117.228	0	17278.8	47.4917	0	3908.36	0	2116.06	0	0	0	0	0	0	0	0	0	0	0	0	0	226.019	37.7742	49.5625	143.706
dnah5	chr15_28448326_28448355	44.3909	144.731	168.43	46.7965	176.342	0	0	0	0	0	0	0	0	0	0	0	0	0.481508	0	0	116.125	234.456	0	0	116.008	0.514109	52.1114	0	0	0	0	0	0	0	0	0	0	0	0	0	0	0	75.3397	37.7742	0	0
kcnh8	chr17_52803513_52803542	44.3909	24.0366	48.2635	16.6641	15.1375	0	0	0	0	0	0	0	0	0	0	0	0	0	0	0	133.277	0	0	0	0	0	0	0	0	0	0	0	0	0	0	0	0	0	0	0	0	0	75.3397	0	0	0
nmur1	chr1_86387462_86387491	44.3909	242.156	246.44	106.605	33.8135	9.32726	0	0	137.408	0	0	0	0	0	0	0	0	0	0	0	488.14	234.456	109.843	29.8941	245.869	0.257055	0	0.513151	0	0	0	0	0	0	0	0	0	0	0	0	0	0	0	0	0	23.9511
abca6	chr11_110250409_110250438	44.3909	231.928	168.43	146.325	20.642	0	50.9907	0	68.704	0	0	0	0	0	0	0	0	0	0	0	172.68	0	0	29.8941	0	0.257055	0	9.74988	0	0	0	0	0	0	0	0	0	0	0	0	0	0	0	0	49.5625	0
fosb	chr7_19307423_19307452	44.3909	117.626	142.427	70.9937	92.594	0	0	0	0	0	0	0	0	0	0	0	0	0.481508	1.17699	0	159.7	117.228	0	29.8941	0	0.257055	2709.79	0.256576	0	0	0	0	0	0	0	0	0	0	0	0	0	0	0	113.323	49.5625	47.9021
cadm3	chr1_173345004_173345033	44.3909	98.7035	80.7676	78.9833	83.3543	0	0	0	0	0	0	0	0	0	0	0	0	0	0	0	179.402	234.456	0	29.8941	0	367.074	52.1114	0	0	0	0	0	0	0	0	0	0	0	0	0	0	0	0	0	0	23.9511
plk1	chr7_122162380_122162409	44.3909	0	211.572	0	44.2328	0	0	0	0	0	0	0	0	0	0	0	0	0	0	0	32.45	0	0	59.7881	0.989411	0	52.1114	965.751	0	0	0	0	0	0	0	0	0	0	0	0	0	0	150.679	0	0	23.9511
oit1	chr14_8357132_8357161	44.3909	203.033	167.445	155.912	247.114	0	0	0	0	0	0	0	0	0	0	0	0	0.481508	0	0	222.051	0	0	0	0	0	0	0.256576	0	0	0	0	0	0	0	0	0	0	0	0	0	0	75.3397	0	0	23.9511
arhgap36	chrX_49497733_49497762	44.3909	206.868	204.283	609.724	43.6431	0	0	0	68.704	0	0	0	0	0	0	0	0	0	0	0	114.038	0	0	0	0.247353	0	0	0	0	0	0	0	0	0	0	0	0	0	0	0	0	0	150.679	37.7742	0	23.9511
map3k1	chr13_111763517_111763546	44.3909	5.36988	17.7295	0	0	0	0	0	0	0	0	0	0	0	0	0	0	0	0	0	39.6353	0	0	0	0	0	0	0	0	0	0	0	0	0	0	0	0	0	0	0	0	0	0	0	0	0
egfr	chr11_16878201_16878230	44.3909	317.59	360.499	89.7123	302.552	9.32726	50.9907	0	0	0	0	0	0	0	0	0	0	0	0.588496	0	274.898	0	0	0	0	0.257055	0	0	0	0	0	0	0	0	0	0	0	0	0	0	0	0	150.679	151.097	49.5625	47.9021
dpp6	chr5_27722666_27722695	44.3909	79.5253	55.3553	220.514	0.19659	0	0	0	0	0	0	0	0	0	0	0	0	0	0	0	74.4032	0	0	29.8941	0	0	0	0	0	0	0	0	0	0	0	0	0	0	0	0	0	0	0	0	49.5625	23.9511
rgn	chrX_20552361_20552390	44.3909	215.562	178.871	199.284	84.5338	0	50.9907	0	0	0	0	0	0	0	0	0	0	0	1.76549	0	212.547	0	0	89.6822	0	0.514109	0	3.59206	0	0	0	0	0	0	0	0	0	0	0	0	0	0	75.3397	0	148.687	0
ackr1	chr1_173332215_173332244	44.3909	107.909	165.081	119.388	115.595	0	0	0	0	0	0	0	0	0	0	0	0	0	0	0	91.7871	0	0	29.8941	0	0	0	0	0	0	0	0	0	0	0	0	0	0	0	0	0	0	0	75.5484	0	47.9021
igf1	chr10_87864862_87864891	88.7818	202.521	117.999	264.571	0.19659	9.32726	0	0	0	0	0	0	0	0	0	0	0	0	0	0	154.369	0	0	0	0	0	0	0	0	0	0	0	0	0	0	0	0	0	0	0	0	0	0	0	99.1249	47.9021
ky	chr9_102539076_102539105	44.3909	46.0275	181.826	65.7433	143.904	9.32726	0	0	0	0	0	0	0	0	0	0	0	0	1.76549	0	163.872	117.228	0	0	0	0	52.1114	0	0	0	0	0	0	0	0	0	0	0	0	0	0	0	0	75.5484	0	0
zfhx3	chr8_108793566_108793595	44.3909	276.677	196.797	334.88	54.8487	0	0	0	0	0	0	0	0	0	0	0	0	0	0.588496	0	291.586	117.228	0	59.7881	0	0	0	0	0	0	0	0	0	0	0	0	0	0	0	0	0	0	75.3397	75.5484	0	0
plac9b	chr14_26170157_26170186	44.3909	309.407	331.541	159.108	135.844	9.32726	0	0	68.704	0	0	0	0	0	0	0	0	0.481508	0	0	340.725	117.228	0	59.7881	338.131	0.257055	0	0.256576	0	0	0	0	0	0	0	0	0	0	0	0	0	0	75.3397	0	49.5625	71.8532
slc6a2	chr8_92972853_92972882	44.3909	516.275	382.563	341.957	403.993	9.32726	0	0	0	0	0	0	0	0	0	0	0	0.481508	0	0	432.744	0	109.843	0	53.6755	0	52.1114	0	0	0	0	0	0	0	0	0	0	0	0	0	0	0	75.3397	113.323	49.5625	47.9021
syn2	chr6_115237309_115237338	44.3909	276.421	317.554	510.88	225.882	0	0	0	68.704	0	0	0	0	0	0	0	0	0	0	0	214.17	117.228	109.843	0	0	0	52.1114	0	0	0	0	0	0	0	0	0	0	0	0	0	0	0	226.019	0	49.5625	23.9511
pfkfb1	chrX_150634606_150634635	44.3909	214.539	201.525	105.92	64.4816	0	0	0	0	0	0	0	0	0	0	0	0	0	0	0	166.19	0	0	29.8941	0	0	0	0	0	0	0	0	0	0	0	0	0	0	0	0	0	0	150.679	0	99.1249	0
obscn	chr11_59132557_59132586	88.7818	306.594	351.831	68.4826	757.069	9.32726	50.9907	0	0	0	0	0	0	0	0	0	0	0.481508	1.76549	0	279.533	0	0	89.6822	0	0.514109	0	0.256576	0	0	0	0	0	0	0	0	0	0	0	0	0	0	150.679	37.7742	198.25	71.8532
pik3c2g	chr6_139882031_139882060	44.3909	151.124	266.139	193.806	568.343	0	0	0	68.704	0	0	0	0	0	0	0	0	0	0	0	286.487	0	0	29.8941	0.247353	0	104.223	0.256576	0	0	0	0	0	0	0	0	0	0	0	0	0	0	226.019	0	49.5625	47.9021
cx3cl1	chr8_94778071_94778100	44.3909	91.7993	79.5856	79.2116	205.24	0	0	0	68.704	0	0	0	0	0	0	0	0	0.481508	0	0	108.012	0	0	59.7881	0.247353	0	0	0	0	0	0	0	0	0	0	0	0	0	0	0	0	0	0	37.7742	99.1249	23.9511
pde1c	chr6_56181758_56181787	44.3909	185.9	156.61	118.703	185.974	9.32726	0	0	0	0	0	0	0	0	0	0	0	0	0	0	176.389	0	109.843	29.8941	0	0	0	0	0	0	0	0	0	0	0	0	0	0	0	0	0	0	75.3397	75.5484	0	71.8532
ces1b	chr8_93068103_93068132	44.3909	181.042	160.747	324.608	74.9009	0	50.9907	0	206.112	0	0	0	0	0	0	0	0	0.481508	1.17699	0	233.408	117.228	0	0	134.065	0.257055	52.1114	0	0	0	0	0	0	0	0	0	0	0	0	0	0	0	150.679	188.871	0	47.9021
gpr17	chr18_31947592_31947621	88.7818	119.672	167.445	278.724	222.147	9.32726	0	0	0	0	0	0	0	0	0	0	0	0	0	0	133.972	0	6590.6	0	0	0	0	0	0	0	0	0	0	0	0	0	0	0	0	0	0	0	75.3397	37.7742	0	0
ryr1	chr7_29068581_29068610	44.3909	163.909	168.43	126.236	109.501	0	0	0	0	0	0	0	0	0	0	0	0	0	1.17699	0	284.864	117.228	109.843	29.8941	0.494705	0.257055	52.1114	0.256576	0	0	0	0	0	0	0	0	0	0	0	0	0	0	75.3397	0	0	0
pld5	chr1_176274758_176274787	44.3909	376.403	313.418	313.879	272.867	9.32726	0	0	0	0	0	0	0	0	0	0	0	0.481508	0.588496	0	283.705	351.683	109.843	29.8941	0	0.257055	0	0	0	0	0	0	0	0	0	0	0	0	0	0	0	0	226.019	75.5484	148.687	95.8043
ces1b	chr8_93076114_93076143	44.3909	57.5344	102.24	34.2413	179.29	0	0	0	0	0	0	0	0	0	0	0	0	0	0	0	120.992	0	0	0	0.247353	49.6115	104.223	0.256576	0	0	0	0	0	0	0	0	0	0	0	0	0	0	75.3397	37.7742	99.1249	23.9511
lonp1	chr17_56626781_56626810	44.3909	181.553	235.999	43.8289	72.5418	0	0	0	274.816	0	0	0	0	0	0	0	0	0	0.588496	0	175.462	0	109.843	59.7881	0	0.257055	0	0	0	0	0	0	0	0	0	0	0	0	0	0	0	0	75.3397	0	0	0
exosc6	chr8_111056387_111056416	44.3909	74.6669	298.643	195.404	18.0863	0	0	0	0	0	0	0	0	0	0	0	0	0	0	0	106.158	117.228	0	29.8941	0.247353	0	104.223	0	0	0	0	0	0	0	0	0	0	0	0	0	0	0	0	0	0	0
cdh1	chr8_106661872_106661901	88.7818	195.617	63.8261	203.85	15.5306	0	0	0	68.704	0	0	0	0	0	0	0	0	0	0.588496	0	140.23	0	109.843	29.8941	255.763	0.257055	0	0.256576	0	0	0	0	0	0	0	0	0	0	0	0	0	0	0	0	49.5625	23.9511
nrg2	chr18_36021929_36021958	44.3909	246.503	213.542	86.7447	119.527	0	0	0	0	0	0	0	0	0	0	0	0	0	0	0	271.189	0	0	59.7881	0.247353	0	156.334	0	0	0	0	0	0	0	0	0	0	0	0	0	0	0	0	0	0	0
ces1b	chr8_93071989_93072018	88.7818	113.023	88.0564	208.187	118.937	0	0	0	68.704	0	0	0	0	0	0	0	0	0.481508	0.588496	0	145.098	0	0	29.8941	0	0	52.1114	0	0	0	0	0	0	0	0	0	0	0	0	0	0	0	75.3397	0	49.5625	23.9511
mrgprb8	chr7_48388806_48388835	44.3909	128.877	56.7343	163.902	124.245	0	0	0	0	0	0	0	0	0	0	0	0	0	0	0	85.0653	117.228	0	0	0	0	52.1114	0	0	0	0	0	0	0	0	0	0	0	0	0	0	0	0	0	0	23.9511
sphkap	chr1_83278694_83278723	44.3909	198.685	184.189	267.539	340.888	0	0	0	68.704	0	0	0	0	0	0	0	0	0	0	0	309.665	0	109.843	89.6822	62.0855	34.7024	156.334	0	0	0	0	0	0	0	0	0	0	0	0	0	0	0	75.3397	113.323	148.687	47.9021
tspan8	chr10_115835338_115835367	44.3909	135.27	84.3135	200.426	23.984	9.32726	0	0	0	0	0	0	0	0	0	0	0	0	0	0	41.2578	0	0	0	0	0	0	0	0	0	0	0	0	0	0	0	0	0	0	0	0	0	0	37.7742	0	23.9511
ccl21c	chr4_41904134_41904163	44.3909	145.242	232.847	86.2881	0.19659	9.32726	0	0	0	0	0	0	0	0	0	0	0	0	0	0	352.314	0	109.843	0	0.247353	0	104.223	0	0	0	0	0	0	0	0	0	0	0	0	0	0	0	0	0	0	0
avpr2	chrX_73892773_73892802	88.7818	241.133	157.398	177.142	215.463	0	0	0	0	0	0	0	0	0	0	0	0	0	0	0	220.66	117.228	0	0	0.742058	0.257055	4012.58	0	0	0	0	0	0	0	0	0	0	0	0	0	0	0	0	37.7742	49.5625	47.9021
akap9	chr5_3962158_3962187	44.3909	198.174	131.986	100.669	26.9329	9.32726	0	0	0	0	0	0	0	0	0	0	0	0	0	0	106.39	117.228	0	0	8.16264	0	52.1114	0	0	0	0	0	0	0	0	0	0	0	0	0	0	0	75.3397	0	0	0
men1	chr19_6336828_6336857	44.3909	266.448	287.414	232.613	215.856	9.32726	0	0	0	0	0	0	0	0	0	0	0	0	0	0	230.395	117.228	0	0	0	0	0	0	0	0	0	0	0	0	0	0	0	0	0	0	0	0	150.679	0	99.1249	47.9021
scn5a	chr9_119536511_119536540	88.7818	202.01	184.189	139.705	151.375	0	0	0	0	0	0	0	0	0	0	0	0	0	0	0	305.03	0	109.843	29.8941	0.247353	0	52.1114	114.433	0	0	0	0	0	0	0	0	0	0	0	0	0	0	75.3397	75.5484	0	47.9021
ryr2	chr13_11692664_11692693	44.3909	117.882	129.228	29.6758	108.125	0	0	0	0	0	0	0	0	0	0	0	0	0.963017	0	0	192.846	117.228	0	29.8941	0	0	0	0	0	0	0	0	0	0	0	0	0	0	0	0	0	0	0	0	0	0
cnn1	chr9_22107784_22107813	88.7818	273.097	225.558	322.553	404.583	0	0	0	68.704	0	0	0	0	0	0	0	0	0.481508	0	0	464.73	0	0	29.8941	0	0	104.223	0.256576	0	0	0	0	0	0	0	0	0	0	0	0	0	0	75.3397	37.7742	198.25	71.8532
rnf186	chr4_138967653_138967682	44.3909	247.014	246.046	377.796	329.485	0	0	0	68.704	0	0	0	0	0	0	0	0	0	0.588496	0	242.448	0	0	29.8941	0	0	52.1114	0	0	0	0	0	0	0	0	0	0	0	0	0	0	0	150.679	75.5484	49.5625	95.8043
has3	chr8_106878758_106878787	44.3909	222.466	268.7	65.7433	368.803	18.6545	0	0	68.704	0	0	0	0	0	0	0	0	0	0	0	403.539	0	0	29.8941	0	0	52.1114	0	0	0	0	0	0	0	0	0	0	0	0	0	0	0	0	75.5484	0	0
foxa1	chr12_57542829_57542858	88.7818	491.472	472.589	246.766	283.09	18.6545	101.981	0	0	0	0	0	0	0	0	0	0	0.481508	0.588496	0	400.062	117.228	0	119.576	47.4917	0.257055	104.223	0	0	0	0	0	0	0	0	0	0	0	0	0	0	0	75.3397	113.323	49.5625	95.8043
pfkfb1	chrX_150611013_150611042	44.3909	168.512	103.422	244.711	649.534	0	0	0	0	0	0	0	0	0	0	0	0	0	0	0	264.004	0	0	6217.97	0.247353	0.257055	52.1114	0	0	0	0	0	0	0	0	0	0	0	0	0	0	0	301.359	37.7742	99.1249	71.8532
gpr17	chr18_31947914_31947943	88.7818	447.234	293.324	474.585	119.92	18.6545	50.9907	0	0	0	0	0	0	0	0	0	0	0.481508	0	0	287.182	351.683	109.843	29.8941	0.247353	0.514109	52.1114	216.037	0	0	0	0	0	0	0	0	0	0	0	0	0	0	150.679	37.7742	49.5625	95.8043
osr1	chr12_9579748_9579777	44.3909	368.987	441.07	524.349	267.756	0	0	0	68.704	0	0	0	0	0	0	0	0	0.481508	0.588496	0	189.832	0	109.843	29.8941	0	0	0	0	0	0	0	0	0	0	0	0	0	0	0	0	0	0	376.698	37.7742	198.25	23.9511
oit1	chr14_8358342_8358371	44.3909	71.8541	103.619	6.84826	128.177	0	0	0	0	0	0	0	0	0	0	0	0	0	0	0	110.562	234.456	0	119.576	850.398	0.257055	156.334	0	0	0	0	0	0	0	0	0	0	0	0	0	0	0	0	0	0	47.9021
clec4g	chr8_3717471_3717500	44.3909	184.877	240.727	110.029	54.2589	0	0	0	68.704	0	0	0	0	0	0	0	0	0	0	0	233.176	0	0	0	0	0.257055	52.1114	0.256576	0	0	0	0	74.3683	0	0	0	0	0	0	0	0	0	0	0	0	0
des	chr1_75362670_75362699	44.3909	208.658	188.523	229.873	108.911	0	0	0	0	0	0	0	0	0	0	0	0	0	0	0	183.806	0	109.843	59.7881	0	0	0	0	0	0	0	0	0	0	0	0	0	0	0	0	0	0	150.679	75.5484	49.5625	71.8532
trpm3	chr19_22733039_22733068	44.3909	141.918	119.575	275.757	277.979	0	0	0	68.704	0	0	0	0	0	0	0	0	0	0.588496	0	138.84	0	109.843	29.8941	0	0	52.1114	0	0	0	0	0	0	0	0	0	0	0	0	0	0	0	0	151.097	99.1249	0
xirp2	chr2_67509102_67509131	88.7818	208.914	127.258	119.845	72.935	18.6545	0	0	68.704	0	0	0	0	0	0	0	0	0	0.588496	0	127.714	0	109.843	29.8941	0	0	0	0	48.0922	0	0	0	0	0	0	0	0	0	0	0	0	0	75.3397	0	0	0
emilin3	chr2_160912025_160912054	44.3909	196.64	244.864	122.812	380.009	0	0	0	68.704	0	0	0	0	0	0	0	0	0	0	0	243.838	117.228	0	59.7881	122.44	0	52.1114	0	0	0	0	0	0	0	0	0	0	0	0	0	0	0	75.3397	75.5484	99.1249	95.8043
apob	chr12_7988880_7988909	44.3909	197.407	128.44	98.1584	154.913	0	0	0	0	0	0	0	0	0	0	0	0	0.481508	0.588496	0	203.508	0	109.843	0	0.247353	0	0	0	0	0	0	0	0	0	0	0	0	0	0	0	0	0	0	75.5484	0	0
pik3c2g	chr6_139847621_139847650	88.7818	435.472	371.728	570.46	973.908	9.32726	0	0	0	0	0	0	0	0	0	0	0	0	0	0	378.274	0	329.53	0	0.247353	0	52.1114	0	0	0	0	0	0	0	0	0	0	0	0	0	0	0	301.359	75.5484	297.375	71.8532
pbrm1	chr14_31074888_31074917	44.3909	76.2011	78.9946	35.1544	29.4885	0	0	0	0	0	0	0	0	0	0	0	0	0	0	0	81.1249	117.228	0	0	0	0	0	0	0	0	0	0	0	0	0	0	0	0	0	0	0	0	0	0	0	0
ptpn13	chr5_103527079_103527108	44.3909	182.064	189.311	54.3296	162.58	0	0	0	0	0	0	0	0	0	0	0	0	0	0	0	179.17	0	0	0	0	0	0	0.256576	0	0	0	0	0	0	0	0	0	0	0	0	0	0	0	0	0	0
npr1	chr3_90465072_90465101	44.3909	241.389	208.42	141.987	232.173	0	50.9907	0	0	0	0	0	0	0	0	0	0	0	0	0	189.369	0	0	0	26.9614	0	0	0	0	0	0	0	0	0	0	0	0	0	0	0	0	0	0	0	99.1249	23.9511
trdn	chr10_33333221_33333250	44.3909	83.1052	53.7794	182.392	45.8055	0	0	0	0	0	0	0	0	0	0	0	0	0	0	0	34.0725	0	0	0	0	0	0	0	0	0	0	0	0	0	0	0	0	0	0	0	0	0	0	0	0	23.9511
id4	chr13_48261873_48261902	88.7818	165.699	135.335	212.524	155.7	9.32726	0	0	0	0	0	0	0	0	0	0	0	0	0	0	262.149	0	219.687	29.8941	0.247353	0.257055	52.1114	0	0	0	0	0	0	0	0	0	0	0	0	0	0	0	75.3397	37.7742	99.1249	0
prrc2b	chr2_32213113_32213142	44.3909	152.658	207.435	156.825	537.281	0	0	0	68.704	0	0	0	0	0	0	0	0	0.481508	0	0	160.396	0	0	0	0	0	52.1114	0	0	0	0	0	0	0	0	0	0	0	0	0	0	0	75.3397	75.5484	0	71.8532
car3	chr3_14864344_14864373	44.3909	133.736	116.62	146.325	23.984	0	50.9907	0	0	0	0	0	0	0	0	0	0	0.481508	0.588496	0	233.408	117.228	0	0	0.247353	0	0	0	0	0	0	0	0	0	0	0	0	0	0	0	0	0	0	37.7742	49.5625	23.9511
csmd1	chr8_16071378_16071407	44.3909	137.827	113.075	73.5047	161.204	0	0	0	0	0	0	0	0	0	0	0	0	0	0	0	212.547	0	109.843	0	0.247353	0	0	0	0	0	0	0	68084.2	0	0	10.3768	0	0	0	10.9187	0	0	75.3397	37.7742	49.5625	0
slc27a6	chr18_58598559_58598588	44.3909	264.658	170.597	173.261	126.997	0	0	0	0	0	0	0	0	0	0	0	0	0	0.588496	0	154.833	234.456	0	59.7881	0.247353	0	52.1114	0	0	0	0	0	0	0	0	0	0	0	0	0	0	0	75.3397	37.7742	0	0
kcnj16	chr11_111024898_111024927	44.3909	207.124	216.693	223.71	405.369	0	0	0	0	0	0	0	0	0	0	0	0	0	0	0	187.514	0	0	0	0	0	0	0	0	0	0	0	0	0	0	0	0	0	0	0	0	0	150.679	0	148.687	47.9021
lmod1	chr1_135364824_135364853	44.3909	166.466	140.26	144.498	147.246	0	0	0	0	0	0	0	0	0	0	0	0	0	0	0	170.826	0	0	0	0	81.4863	52.1114	0	0	0	0	0	0	0	0	0	0	0	0	0	0	0	150.679	37.7742	0	23.9511
tmem132c	chr5_127562904_127562933	44.3909	115.58	125.288	196.089	74.1145	0	50.9907	0	0	0	0	0	0	0	0	0	0	0	0	0	118.442	0	109.843	0	0	0	0	0	0	0	0	0	0	0	0	0	0	0	0	0	0	0	0	37.7742	49.5625	0
ckmt2	chr13_91863221_91863250	44.3909	101.261	155.625	15.9793	148.033	0	0	0	0	0	0	0	0	0	0	0	0	0	1.17699	0	114.27	117.228	0	0	0	0	52.1114	0	0	0	0	0	0	0	0	0	0	0	0	0	0	0	0	37.7742	0	23.9511
nat8l	chr5_33997136_33997165	88.7818	269.772	363.06	223.025	830.397	0	0	0	0	0	0	0	0	0	0	0	0	0.481508	0	0	295.758	234.456	219.687	29.8941	0.247353	0	0	0	0	0	0	0	0	0	0	0	0	0	0	0	0	0	226.019	0	49.5625	23.9511
c4bp	chr1_130636849_130636878	44.3909	127.854	138.093	123.269	115.005	0	0	0	68.704	0	0	0	0	0	0	0	0	0	0	0	136.522	0	0	29.8941	0	0	0	0.256576	0	0	0	0	0	0	0	0	0	0	0	0	0	0	0	37.7742	0	47.9021
c1qtnf7	chr5_43609177_43609206	44.3909	96.9135	146.17	60.9495	41.8737	0	0	0	0	0	0	0	0	0	0	0	0	0	0	0	217.415	0	109.843	29.8941	0	0.257055	0	0.256576	0	0	0	0	0	0	0	0	0	0	0	0	0	0	150.679	0	49.5625	23.9511
lgr6	chr1_134987962_134987991	44.3909	160.073	189.114	27.1648	179.094	0	0	0	137.408	0	0	0	0	0	0	0	0	0	0	0	361.817	234.456	0	119.576	0.247353	0.514109	0	0	0	0	0	0	0	0	0	0	0	0	0	0	0	0	75.3397	0	0	0
myh9	chr15_77783473_77783502	44.3909	81.3153	104.013	69.3957	48.1646	9.32726	0	0	68.704	0	0	0	0	0	0	0	0	0	0	0	23.8739	0	0	0	0	0	0	0	0	0	0	0	0	0	0	0	0	0	0	0	0	0	0	0	0	0
smarca4	chr9_21647383_21647412	88.7818	155.215	272.837	55.9275	455.303	0	50.9907	0	274.816	0	0	0	0	0	0	0	0	0	0	0	311.056	117.228	109.843	0	0	0	1459.12	0.256576	0	0	0	0	0	0	0	0	0	0	0	0	0	0	75.3397	75.5484	49.5625	23.9511
slc2a4	chr11_69943474_69943503	44.3909	238.065	178.674	250.19	322.015	0	0	0	0	0	0	0	0	0	0	0	0	0	0	0	205.826	0	0	29.8941	0	0	0	0	0	0	0	0	0	0	0	0	0	0	0	0	0	0	150.679	113.323	49.5625	0
has3	chr8_106874215_106874244	44.3909	448.768	213.542	2994.06	11.4022	9.32726	50.9907	0	68.704	0	0	0	0	0	0	0	0	0.481508	0.588496	0	247.779	0	0	29.8941	0	0	52.1114	0	0	0	0	0	0	0	0	0	0	0	0	0	0	0	828.736	226.645	346.937	287.413
pld5	chr1_176089967_176089996	44.3909	271.051	267.518	187.186	454.517	0	0	0	274.816	0	0	0	0	0	0	0	0	0	0	0	235.726	0	0	29.8941	0	0	52.1114	0	0	0	0	0	0	0	0	0	0	0	0	0	0	0	0	0	49.5625	0
car4	chr11_84964558_84964587	44.3909	299.946	316.175	275.528	209.762	0	0	0	0	0	0	0	0	0	0	0	0	0	0	0	286.95	117.228	109.843	0	0.494705	0	52.1114	0	0	0	0	0	0	0	0	0	0	0	0	0	0	0	75.3397	151.097	148.687	23.9511
atoh8	chr6_72235064_72235093	44.3909	138.594	172.173	189.469	349.931	0	0	0	0	0	0	0	0	0	0	0	0	0.481508	0	0	150.892	0	109.843	0	0	0	0	0	0	0	0	0	0	0	0	0	0	0	0	0	0	0	75.3397	0	0	23.9511
chst9	chr18_15452729_15452758	44.3909	122.229	159.368	71.9068	80.9952	0	0	0	68.704	0	0	0	0	0	0	0	0	0	0.588496	0	81.3567	0	0	0	0.247353	0	0	0.256576	0	0	0	0	0	0	0	0	0	0	0	0	0	0	75.3397	0	99.1249	47.9021
c6	chr15_4731781_4731810	88.7818	205.845	217.481	160.021	98.0986	0	0	0	137.408	0	0	0	0	0	0	0	0	0	0	0	192.846	0	219.687	29.8941	0	0	0	0	0	0	0	0	37.1841	6035.27	0	0	0	0	0	0	0	0	0	37.7742	49.5625	23.9511
ngfr	chr11_95578043_95578072	88.7818	282.302	269.685	269.593	253.798	0	0	0	68.704	0	0	0	0	0	0	0	0	0.481508	0	0	348.142	117.228	0	119.576	0.247353	0	52.1114	0.256576	0	0	0	0	0	0	0	0	0	0	0	0	0	0	150.679	37.7742	49.5625	71.8532
bmp5	chr9_75776316_75776345	44.3909	101.772	137.502	143.357	53.6692	9.32726	0	0	68.704	0	0	0	0	0	0	0	0	0	0	0	67.4496	0	0	29.8941	0.247353	0.257055	52.1114	111.354	0	0	0	0	37.1841	0	0	0	0	862.839	0	0	0	0	0	0	99.1249	71.8532
plxna4	chr6_32516763_32516792	44.3909	322.96	227.725	153.401	607.857	0	50.9907	0	0	0	0	0	0	0	0	0	0	0.481508	0	0	312.447	234.456	0	29.8941	20.2829	0.771164	156.334	0	0	0	0	0	0	0	0	0	0	0	0	0	0	0	150.679	0	0	23.9511
mab21l1	chr3_55783572_55783601	44.3909	211.982	217.284	61.6344	77.8498	9.32726	0	0	0	0	0	0	0	0	0	0	0	0	0	0	105.926	0	0	59.7881	0	0	0	0	0	0	0	0	0	0	0	0	0	0	0	0	0	0	0	0	49.5625	23.9511
thsd7b	chr1_129921303_129921332	44.3909	111.233	86.2834	46.1116	243.379	9.32726	0	0	0	0	0	0	0	0	0	0	0	0	0	0	259.832	0	0	0	0.247353	0.514109	0	0	0	0	0	0	0	0	0	0	0	0	0	0	0	0	75.3397	37.7742	49.5625	0
tmem213	chr6_38115563_38115592	44.3909	181.042	335.087	358.621	254.191	0	0	0	68.704	0	0	0	0	0	0	0	0	0	0.588496	0	132.813	117.228	0	0	0	0	0	0	0	0	0	0	0	0	0	0	0	0	0	0	0	0	75.3397	75.5484	148.687	23.9511
nrg2	chr18_36196471_36196500	88.7818	275.398	237.181	199.056	347.965	9.32726	0	0	0	0	0	0	0	0	0	0	0	0.481508	0.588496	0	356.486	0	0	59.7881	0	0.257055	52.1114	0	0	0	0	0	0	0	0	0	0	0	0	0	0	0	0	37.7742	99.1249	71.8532
dlk1	chr12_109459783_109459812	44.3909	127.087	233.635	45.6551	51.8998	0	0	0	0	0	0	0	0	0	0	0	0	0	0	0	110.098	0	0	0	0	0	0	0	0	0	0	0	0	0	0	0	0	0	0	0	0	0	0	75.5484	49.5625	0
hoxa2	chr6_52164343_52164372	44.3909	303.782	222.012	57.982	166.119	0	0	0	0	0	15.8156	0	8.20746	9814.52	0	0	72.9928	0.481508	0	0	274.898	0	0	29.8941	0	0	0	0	0	37.6935	1.12005	145.986	0	0	0	5.18838	0	0	109.502	10.9187	14.101	0.506881	75.3397	37.7742	148.687	71.8532
rxrg	chr1_167627409_167627438	44.3909	146.01	172.567	159.108	238.464	0	0	0	0	0	0	0	0	0	0	0	0	0	0.588496	0	256.123	117.228	0	89.6822	364.845	0.514109	156.334	0.769727	0	0	0	0	0	0	0	0	0	0	0	0	0	0	0	75.5484	0	95.8043
pigr	chr1_130841763_130841792	44.3909	211.982	247.031	115.051	98.6883	0	0	0	0	0	0	0	0	0	0	0	0	0	0	0	246.852	0	109.843	29.8941	0	0.257055	52.1114	0	0	0	0	0	0	0	0	0	0	0	0	0	0	0	0	0	0	0
angptl7	chr4_148500180_148500209	44.3909	242.667	206.647	146.781	127.194	9.32726	50.9907	0	68.704	0	0	0	0	0	0	0	0	0.481508	0	0	165.727	0	0	0	0	0	0	0.256576	0	0	0	0	0	0	0	0	0	0	0	0	0	0	0	37.7742	0	23.9511
gm13304	chr4_41904215_41904244	44.3909	177.973	244.667	146.096	304.912	0	0	0	68.704	0	0	0	0	0	0	0	0	0	0.588496	0	234.799	0	109.843	29.8941	0.494705	0.257055	52.1114	0	0	0	0	0	0	0	0	0	0	0	0	0	0	0	75.3397	37.7742	49.5625	0
c4bp	chr1_130648391_130648420	44.3909	278.978	207.435	223.482	300.98	0	0	0	68.704	0	0	0	0	7101.46	6.49467	0	0	0	0	0	209.534	0	109.843	59.7881	81.379	0	104.223	0	0	37.6935	0	0	0	0	0	10.3768	0	0	0	5.45933	28.2019	0.506881	150.679	37.7742	247.812	215.56
9330159f19rik	chr10_29224519_29224548	44.3909	104.073	70.3269	22.5993	84.1407	0	0	0	0	0	0	0	0	0	0	0	0	0	0	0	20.8607	0	0	0	33.1453	0	0	0	0	0	0	0	0	0	0	0	0	0	0	0	0	0	0	0	0	0
kcnb1	chr2_167188379_167188408	44.3909	272.074	198.373	139.476	145.87	9.32726	0	0	68.704	0	0	0	0	0	0	0	0	0	0	0	411.188	234.456	219.687	59.7881	0	0.257055	0	0.513151	0	0	0	0	0	0	0	0	0	0	0	0	0	0	150.679	0	0	0
gfap	chr11_102891152_102891181	44.3909	197.407	142.23	178.055	146.853	0	0	0	68.704	0	0	0	0	0	0	0	0	0	0	0	174.303	0	0	29.8941	0	0	52.1114	0	0	0	0	0	0	0	0	0	0	0	0	0	0	0	150.679	0	0	71.8532
tnnt3	chr7_142512250_142512279	44.3909	209.937	149.912	356.566	86.6963	0	0	0	0	0	0	0	0	0	0	0	0	0	0	0	222.051	0	0	0	0	0	0	0.256576	0	0	0	0	0	0	0	0	0	0	0	0	0	0	75.3397	37.7742	99.1249	23.9511
erbb4	chr1_68254619_68254648	44.3909	243.434	305.538	263.43	766.899	0	0	0	0	0	0	0	0	0	0	0	0	0.481508	0	0	244.766	0	109.843	29.8941	53.1808	0	104.223	0	0	0	0	0	0	0	0	0	0	0	0	0	0	0	226.019	151.097	198.25	47.9021
gria4	chr9_4664801_4664830	44.3909	192.293	162.52	382.818	0	0	0	0	0	0	0	0	0	0	0	0	0	0	0.588496	0	124.932	117.228	0	59.7881	0	0	104.223	0	0	0	97.4444	0	0	0	0	0	0	0	0	0	0	0	0	75.5484	99.1249	23.9511
csmd1	chr8_17027289_17027318	44.3909	301.992	274.019	344.924	304.715	0	0	0	0	0	0	0	0	0	0	0	0	0	0	0	287.878	0	0	29.8941	0.742058	0.257055	52.1114	0	0	0	0	0	0	0	0	0	0	0	0	0	0	0	376.698	75.5484	198.25	47.9021
kdm5c	chrX_152270725_152270754	44.3909	402.997	357.544	507.228	264.807	0	0	0	206.112	0	0	0	0	0	0	0	0	0	0	0	372.016	351.683	0	59.7881	0.247353	0.257055	0	0.256576	0	0	0	0	0	0	0	0	0	0	0	0	0	0	0	0	99.1249	95.8043
plcxd3	chr15_4574844_4574873	44.3909	174.137	67.569	256.125	55.4385	9.32726	0	0	0	0	0	0	0	0	0	0	0	0	0	0	75.3303	0	0	0	31.9085	0	0	0.256576	0	0	0	0	0	0	0	0	17.6688	0	0	0	0	0	0	0	148.687	23.9511
ptprd	chr4_75957121_75957150	44.3909	115.836	79.5856	35.611	404.779	0	0	0	0	0	0	0	0	0	0	0	0	0	0	0	78.3435	0	0	0	0	0	52.1114	0	0	0	0	0	0	0	0	0	0	0	0	0	0	0	75.3397	0	49.5625	23.9511
casq2	chr3_102113098_102113127	44.3909	235.763	258.85	115.279	225.489	0	0	0	68.704	0	0	0	0	0	0	0	0	0	0.588496	0	250.097	0	0	59.7881	0.247353	0	0	0	0	0	0	0	0	0	0	0	0	0	0	0	0	0	75.3397	0	49.5625	47.9021
cpa1	chr6_30640636_30640665	133.173	152.402	383.941	63.6888	49.3442	0	0	0	0	0	0	0	0	0	0	0	0	0	0.588496	0	282.083	117.228	219.687	59.7881	0	0	0	0.256576	0	0	0	0	0	0	0	0	0	0	0	0	0	0	0	0	49.5625	167.657
cyc1	chr15_76344449_76344478	44.3909	80.0367	255.304	170.293	165.922	0	0	0	0	0	0	0	0	0	0	0	0	0	0	0	267.48	117.228	109.843	0	0	0	104.223	0	0	0	0	0	0	0	0	0	0	0	0	0	0	0	226.019	0	99.1249	0
abca9	chr11_110138287_110138316	88.7818	267.215	183.401	152.031	376.274	0	0	0	0	0	0	0	0	0	0	0	0	0	0	0	108.707	0	0	0	0	0	0	0.256576	0	0	0	0	0	0	0	0	0	0	0	0	0	0	75.3397	75.5484	0	95.8043
ptprb	chr10_116338684_116338713	44.3909	245.48	203.495	175.544	350.127	0	0	0	68.704	0	0	0	0	0	0	0	0	0.481508	0	0	193.309	0	0	0	0.247353	0.257055	0	0	0	0	0	0	0	0	0	0	0	0	0	0	0	0	75.3397	0	49.5625	23.9511
kat6b	chr14_21669242_21669271	44.3909	298.667	216.103	104.778	19.8556	0	0	0	68.704	0	0	0	0	0	0	0	0	0	0	0	117.515	0	0	0	0	0	0	0	0	0	0	0	0	0	0	0	0	0	0	0	0	0	75.3397	0	0	23.9511
xirp2	chr2_67510519_67510548	44.3909	164.932	166.854	102.267	53.6692	0	0	0	0	0	0	0	0	0	0	0	0	0	0	0	233.408	117.228	0	0	0	0	0	0	0	0	0	0	0	0	0	0	0	0	0	0	0	0	0	37.7742	0	0
clec3b	chr9_123157019_123157048	44.3909	274.631	226.346	187.186	169.068	0	0	0	0	0	0	0	0	0	0	0	0	0.963017	0	0	425.326	0	0	29.8941	46.997	0.514109	52.1114	0	0	0	0	0	0	0	0	0	0	0	0	0	0	0	0	37.7742	49.5625	23.9511
plxna4	chr6_32310472_32310501	44.3909	202.777	176.113	114.823	237.481	9.32726	0	0	68.704	0	0	0	0	0	0	0	0	1.44453	0	0	244.534	3634.06	0	29.8941	0	0	469.003	0	2404.61	0	0	0	0	0	0	0	0	0	0	0	0	0	527.378	74717.4	49.5625	47.9021
cdh1	chr8_106653823_106653852	88.7818	153.681	137.108	45.8834	70.7725	0	0	0	0	0	0	0	0	0	0	0	0	0	0.588496	0	186.124	0	109.843	29.8941	21.767	0	104.223	60.8084	0	0	0	0	0	0	0	0	0	0	0	0	0	0	75.3397	37.7742	0	23.9511
pck1	chr2_173157101_173157130	44.3909	316.056	144.594	96.3322	483.416	0	0	0	68.704	0	0	0	0	0	0	0	0	0	0	0	144.402	0	0	0	0.247353	0	104.223	0.256576	0	0	0	0	0	0	0	0	0	0	0	0	0	0	75.3397	37.7742	99.1249	47.9021
hba-a1	chr11_32284060_32284089	88.7818	279.489	254.91	244.94	261.269	0	50.9907	0	0	0	0	0	0	0	0	0	0	0.481508	0	0	248.474	0	219.687	29.8941	46.0076	0	0	0	0	0	0	0	0	0	0	0	0	0	0	0	0	0	150.679	0	49.5625	47.9021
ppp1r14a	chr7_29289444_29289473	88.7818	191.781	175.719	116.649	409.891	9.32726	0	0	137.408	0	0	0	0	0	0	0	0	0	0.588496	0	296.454	0	0	29.8941	0	0.257055	0	0	0	0	0	0	0	0	0	0	0	0	0	0	0	0	75.3397	0	49.5625	71.8532
bcor	chrX_12056479_12056508	44.3909	710.87	218.269	6490.56	2004.04	9.32726	50.9907	0	137.408	0	0	0	0	0	0	0	0	0.963017	0.588496	0	285.56	0	0	149.47	0	0	52.1114	0.256576	0	0	0	0	0	0	0	0	0	0	0	0	0	0	1808.15	415.516	1239.06	383.217
fgf10	chr13_118715651_118715680	44.3909	101.261	59.2952	58.6668	405.762	0	0	0	0	0	0	0	0	0	0	0	0	0	0	0	146.257	0	0	29.8941	27.2088	0	0	0	0	0	0	0	0	0	0	0	0	0	0	0	0	0	75.3397	0	49.5625	47.9021
fat4	chr3_38889437_38889466	44.3909	49.096	33.292	50.6771	11.7954	0	0	0	0	0	0	0	0	0	0	0	0	0	0	0	102.913	117.228	0	0	0	0	0	0	0	0	0	0	0	0	0	0	0	0	0	0	0	0	0	0	0	0
herc1	chr9_66439165_66439194	44.3909	175.672	163.899	70.7654	38.7283	0	0	0	0	0	0	0	0	0	0	0	0	0.481508	0	0	165.958	0	0	29.8941	0.247353	0.257055	0	0	0	0	0	0	0	0	0	0	0	0	0	0	0	0	0	37.7742	0	23.9511
apob	chr12_8002167_8002196	44.3909	262.101	171.582	81.4943	116.578	0	0	0	0	0	0	0	0	0	0	0	0	0.481508	0	0	275.129	0	109.843	59.7881	0	0	0	24.6313	0	0	0	0	0	0	0	0	0	0	0	0	0	0	0	0	49.5625	0
muc5b	chr7_141857450_141857479	44.3909	356.458	271.458	229.873	212.907	0	0	0	0	0	0	0	0	0	0	0	0	0	0	0	375.724	117.228	0	29.8941	0	0	0	0	0	0	0	0	0	0	0	0	0	0	0	0	0	0	0	37.7742	99.1249	23.9511
gata3	chr2_9874596_9874625	44.3909	163.653	163.308	90.3971	155.503	0	0	0	0	0	0	0	0	0	0	0	0	0	0	0	188.442	117.228	0	0	0	0.257055	52.1114	0	0	0	0	0	0	0	0	0	0	0	0	0	0	0	150.679	37.7742	0	23.9511
hs3st4	chr7_124396949_124396978	88.7818	283.325	286.823	174.402	206.027	9.32726	0	0	68.704	0	0	0	0	0	0	0	0	0.481508	0	0	231.322	0	0	0	0	0	0	0	0	0	0	0	0	0	0	0	0	0	0	0	0	0	0	113.323	148.687	23.9511
capn11	chr17_45638726_45638755	44.3909	355.946	309.084	547.176	429.943	9.32726	0	0	0	0	0	0	0	0	0	0	0	0	0	0	248.011	117.228	109.843	29.8941	52.9335	0	52.1114	0	0	0	0	0	0	0	0	0	0	0	0	0	0	0	150.679	37.7742	148.687	71.8532
arid2	chr15_96370128_96370157	88.7818	127.343	188.72	51.5903	44.8226	0	0	0	68.704	0	0	0	0	0	0	0	0	0	0	0	210.229	0	0	29.8941	0.247353	0.257055	52.1114	0	0	0	0	0	0	0	0	0	0	0	0	0	0	0	0	37.7742	49.5625	23.9511
dnah8	chr17_30744588_30744617	44.3909	193.827	274.413	225.764	276.013	0	0	0	0	0	0	0	0	0	0	0	0	0	0	0	245.229	0	109.843	119.576	57.8805	0	52.1114	0	0	0	0	0	0	0	0	0	0	0	0	0	0	0	75.3397	37.7742	0	47.9021
trip11	chr12_101912786_101912815	44.3909	473.828	411.718	298.356	656.612	0	0	0	68.704	0	0	0	0	0	0	0	0	1.44453	0	0	295.758	0	0	89.6822	29.6823	0.257055	104.223	0	0	0	0	0	0	0	0	0	0	0	0	0	0	0	301.359	151.097	198.25	0
ush2a	chr1_188654629_188654658	44.3909	277.444	254.122	136.28	215.856	0	0	0	68.704	0	0	0	0	0	0	0	0	0	0	0	314.069	117.228	0	59.7881	0.247353	0	52.1114	0	0	0	0	0	0	0	0	0	0	0	0	0	0	0	75.3397	75.5484	99.1249	47.9021
gpx3	chr11_54907238_54907267	44.3909	173.115	221.027	208.872	242.003	0	0	0	0	0	0	0	0	0	0	0	0	0	0	0	362.281	117.228	0	59.7881	0	0	104.223	0	0	0	0	0	0	0	0	0	0	0	0	0	0	0	150.679	0	297.375	47.9021
oxtr	chr6_112489126_112489155	44.3909	123.251	262.396	168.239	126.408	0	0	0	0	0	0	0	0	0	0	0	0	0	0	0	147.647	0	109.843	0	0	0	0	0	0	0	0	0	0	0	0	0	0	0	0	0	0	0	75.3397	0	49.5625	47.9021
mab21l1	chr3_55783165_55783194	44.3909	285.882	247.228	327.804	319.066	0	0	0	0	0	0	0	0	0	0	0	0	0	0	0	248.938	0	109.843	0	0	0	0	0	0	0	0	0	0	0	0	0	0	0	0	0	0	0	0	75.5484	49.5625	47.9021
nat8l	chr5_33997080_33997109	44.3909	321.937	239.742	204.078	214.873	0	0	0	0	0	0	0	0	0	0	0	0	0.481508	0.588496	0	384.532	117.228	109.843	59.7881	0	0	0	0.256576	0	0	0	0	0	0	0	0	0	0	0	0	0	0	150.679	0	0	0
defb22	chr2_152485997_152486026	44.3909	239.087	338.436	547.176	176.145	9.32726	0	0	68.704	0	0	0	0	0	0	0	0	0	0.588496	0	440.856	117.228	109.843	29.8941	0.247353	0	0	0	0	0	0	0	0	0	0	0	0	0	0	0	0	0	75.3397	151.097	49.5625	23.9511
grm3	chr5_9512231_9512260	44.3909	73.1326	75.2517	111.855	135.844	0	0	0	0	0	0	0	0	0	0	0	0	0	0	0	86.9196	117.228	0	89.6822	0.247353	0	0	0.256576	0	0	0	0	0	0	0	0	0	0	0	0	0	0	0	0	0	47.9021
gabrp	chr11_33563892_33563921	44.3909	59.5801	75.2517	185.816	297.048	9.32726	0	0	0	0	0	0	0	0	0	0	0	0	0	0	58.6417	820.594	0	0	0	0	104.223	13.8551	2981.72	0	0	0	0	0	0	0	0	0	0	0	0	0	75.3397	113.323	0	0
sgcg	chr14_61245848_61245877	44.3909	122.484	123.712	225.993	174.376	0	0	0	0	0	0	0	0	0	0	0	0	0.481508	0	0	196.554	0	109.843	0	0	0.257055	0	0	0	0	0	0	0	0	0	0	0	0	0	0	0	0	150.679	0	49.5625	23.9511
cacna2d1	chr5_16319294_16319323	44.3909	174.649	260.229	241.744	159.435	0	0	0	137.408	0	0	0	0	0	0	0	0	0.481508	0	0	230.858	0	0	29.8941	0	0	0	0	0	0	0	0	0	0	0	0	0	0	0	0	0	0	150.679	0	0	47.9021
tacr1	chr6_82403712_82403741	44.3909	293.042	269.882	272.789	20.0522	0	0	0	0	0	0	0	0	0	0	0	0	0	0	0	374.565	0	109.843	0	0.742058	0.257055	0	0.256576	0	0	0	0	0	0	0	0	0	0	0	0	0	0	0	37.7742	0	71.8532
hsd17b13	chr5_103977179_103977208	44.3909	196.384	182.417	45.8834	155.503	0	0	0	0	0	0	0	0	0	0	0	0	0	0	0	219.501	0	0	29.8941	43.7814	0	52.1114	0.256576	0	0	0	0	0	0	0	0	0	0	0	0	0	41.0574	0	37.7742	49.5625	23.9511
btnl9	chr11_49178788_49178817	44.3909	202.265	223.391	252.929	433.285	0	0	0	68.704	0	0	0	0	0	0	0	0	0	0	0	345.592	0	109.843	29.8941	0.742058	0	52.1114	0	0	0	0	0	0	0	0	0	0	0	0	0	0	0	75.3397	113.323	0	47.9021
mrgpra2b	chr7_47464520_47464549	44.3909	137.571	195.221	151.575	329.092	0	50.9907	0	0	0	0	0	0	0	0	0	0	0	0	0	186.819	0	0	89.6822	0	0	0	0.256576	0	0	0	0	0	0	0	0	0	0	0	0	0	0	75.3397	0	99.1249	0
arid1a	chr4_133720954_133720983	44.3909	203.544	337.057	531.425	238.661	9.32726	0	0	68.704	0	0	0	0	0	0	0	0	0	0	0	341.188	0	109.843	0	0	0	52.1114	0	0	0	0	218.978	37147	0	0	0	0	0	109.502	0	0	0	150.679	151.097	99.1249	47.9021
gmppb	chr9_108049573_108049602	44.3909	43.4704	191.281	0.456551	23.7874	0	0	0	0	0	0	0	0	0	0	0	0	0	0.588496	0	131.422	0	0	0	0.247353	0	0	0	0	0	0	0	0	0	0	0	0	0	0	0	0	0	0	0	0	0
gm13304	chr4_41903705_41903734	44.3909	119.927	183.204	34.2413	100.064	0	0	0	0	0	0	0	0	0	0	0	0	0	0	0	237.812	117.228	0	0	0.247353	66.8342	0	0	0	0	0	0	0	0	0	0	0	0	0	0	0	0	0	0	0	0
igfbp6	chr15_102144745_102144774	44.3909	218.631	279.929	170.065	130.929	9.32726	0	0	68.704	0	0	0	0	0	0	0	0	0	0	0	164.568	117.228	0	0	0.247353	0	52.1114	0	0	0	0	0	0	0	0	0	0	0	0	0	0	0	150.679	0	49.5625	23.9511
pi15	chr1_17602825_17602854	44.3909	125.297	75.4487	32.4151	124.048	18.6545	0	0	0	0	0	0	0	0	0	0	0	344.278	0	0	126.091	0	0	0	0	0	0	0	0	0	0	0	0	0	0	0	0	0	0	0	0	0	75.3397	0	0	0
fosb	chr7_19306551_19306580	44.3909	125.553	144.791	118.247	118.151	0	50.9907	0	0	0	0	0	0	0	0	0	0	0.481508	0	0	145.793	0	0	0	0	0	0	0	0	0	0	0	0	0	0	0	0	0	0	0	0	0	75.3397	0	49.5625	23.9511
olfm4	chr14_80000448_80000477	44.3909	448.513	537.794	361.817	628.696	18.6545	50.9907	0	0	0	0	0	0	0	0	0	0	0.481508	0	0	472.611	0	109.843	59.7881	0.247353	0	52.1114	0.256576	0	0	0	0	0	0	0	0	0	0	0	0	0	0	226.019	37.7742	148.687	23.9511
klb	chr5_65348723_65348752	44.3909	175.672	205.662	61.1778	147.639	9.32726	0	0	68.704	0	0	0	0	0	0	0	0	0	0	0	272.812	820.594	0	89.6822	0.247353	0	0	0	0	0	0	0	0	0	0	0	0	0	0	0	0	0	75.3397	37.7742	0	0
ptx3	chr3_66220166_66220195	44.3909	205.59	184.189	131.943	261.072	9.32726	0	0	137.408	0	0	0	0	0	0	0	0	0	0	0	171.985	0	109.843	29.8941	0.247353	0	0	0	625.199	0	0	0	0	0	0	0	0	0	0	0	0	0	75.3397	0	148.687	23.9511
stag2	chrX_42228313_42228342	44.3909	73.1326	73.8728	68.0261	62.1225	0	0	0	0	0	0	0	0	0	0	0	0	0	0	0	120.528	117.228	0	0	0	0	0	0	0	0	0	0	0	0	0	0	0	0	0	0	0	0	0	0	0	0
cnn1	chr9_22107993_22108022	44.3909	123.507	234.817	228.275	219.198	9.32726	50.9907	0	68.704	0	0	0	0	0	0	0	0	0	0	0	227.613	234.456	0	10462.9	0	0.257055	52.1114	0	0	0	0	0	0	0	0	0	0	0	0	0	0	0	75.3397	37.7742	0	23.9511
oxgr1	chr14_120022199_120022228	88.7818	138.85	126.076	106.376	138.989	9.32726	0	0	0	0	0	0	0	0	0	0	0	0.481508	0	0	197.945	0	0	0	0	0.257055	0	0	0	0	0	0	0	0	0	0	0	0	0	0	0	0	0	0	49.5625	23.9511
dpt	chr1_164796878_164796907	44.3909	317.846	220.042	399.939	209.172	9.32726	0	0	0	0	0	0	0	0	0	0	0	0	1.76549	0	305.03	234.456	0	29.8941	0	0	0	0.256576	0	0	0	0	0	0	0	0	0	0	0	0	0	0	0	37.7742	49.5625	23.9511
fat1	chr8_44951252_44951281	44.3909	208.914	148.14	245.853	38.5317	0	0	0	0	0	0	0	0	0	0	0	0	0.481508	0	0	96.4228	0	109.843	0	0	0	0	0	0	0	0	0	0	0	0	0	0	0	0	0	0	0	0	0	0	47.9021
rxrg	chr1_167631026_167631055	44.3909	334.978	291.157	490.336	244.755	0	0	0	0	0	0	0	0	0	0	0	0	0.481508	0	0	357.645	0	0	59.7881	0	0	3126.68	0.513151	0	0	0	0	0	0	0	0	0	0	0	0	0	0	0	0	49.5625	71.8532
fabp4	chr3_10205948_10205977	44.3909	111.745	100.467	136.509	63.1055	0	0	0	0	0	0	0	0	0	0	0	0	0	0	0	138.84	0	109.843	29.8941	0	0	104.223	0	0	0	0	0	0	0	0	0	0	0	0	0	0	0	150.679	0	0	23.9511
lyve1	chr7_110862772_110862801	88.7818	267.215	214.33	168.696	222.344	0	0	0	68.704	0	0	0	0	0	0	0	0	0	0	0	387.777	351.683	0	89.6822	0.247353	0	0	0	0	0	0	0	0	0	0	0	0	0	0	0	0	0	150.679	75.5484	49.5625	71.8532
npy5r	chr8_66680738_66680767	44.3909	194.85	150.897	199.284	60.5498	0	0	0	0	0	0	0	0	0	0	0	0	0.481508	0	0	240.362	234.456	109.843	0	0	0	0	0	0	0	0	0	0	0	0	0	0	0	0	0	0	0	150.679	37.7742	99.1249	23.9511
slc25a27	chr17_43666932_43666961	44.3909	183.599	209.602	100.441	546.914	0	0	0	0	0	0	0	0	0	0	0	0	0	0	0	253.805	0	109.843	0	0	0	52.1114	20.2695	0	0	0	0	37.1841	0	0	0	0	0	0	1168.3	0	0	150.679	37.7742	99.1249	23.9511
alb	chr5_90468651_90468680	44.3909	144.731	197.782	603.332	125.425	0	50.9907	0	68.704	0	0	0	0	0	0	0	0	0	0	0	303.639	117.228	0	0	67.7746	0	260.557	0	144.277	0	0	0	0	0	0	0	0	0	0	0	0	0	75.3397	0	148.687	119.755
brca2	chr5_150542732_150542761	44.3909	114.046	214.527	9.13102	129.75	0	2753.5	0	0	0	0	0	0	0	0	0	0	0	0	0	194.7	117.228	0	0	0	0	0	0.256576	0	0	0	0	0	0	0	0	0	0	0	0	0	0	0	0	0	71.8532
bbox1	chr2_110292438_110292467	44.3909	105.096	66.978	24.1972	23.0011	0	0	0	0	0	0	0	0	0	0	0	0	0	0	0	109.403	0	0	0	0	0.257055	0	0.256576	0	0	0	0	0	0	0	0	0	0	0	0	0	0	150.679	37.7742	49.5625	47.9021
ntf5	chr7_45415744_45415773	44.3909	283.069	361.09	463.627	402.027	0	0	0	68.704	0	0	0	0	0	0	0	0	0.481508	0	0	196.786	0	0	0	0.247353	0	0	0	0	0	0	0	0	0	0	0	0	0	0	0	0	0	226.019	113.323	0	95.8043
sema3d	chr5_12563222_12563251	44.3909	136.037	169.612	64.8302	97.3122	9.32726	0	0	0	0	0	0	0	0	0	0	0	0	0	0	113.111	0	0	59.7881	0	119.016	0	0	0	0	0	0	0	0	0	0	0	0	0	0	0	0	75.3397	0	0	23.9511
bcorl1	chrX_48370012_48370041	44.3909	168.512	83.1315	118.932	272.081	0	0	0	0	0	0	0	0	0	0	0	0	0.481508	0	0	219.269	117.228	0	0	0.247353	0.257055	0	0	0	0	0	0	0	0	0	0	0	0	0	0	0	0	0	37.7742	49.5625	23.9511
c6	chr15_4781941_4781970	44.3909	55.4887	59.0982	0.228275	11.0091	0	0	0	0	0	0	0	0	0	0	0	0	0	0	0	25.0328	0	0	0	0	0	0	0	0	0	0	0	0	0	0	0	0	0	0	0	0	0	75.3397	0	0	0
chl1	chr6_103649526_103649555	44.3909	440.33	342.376	695.327	82.7645	9.32726	0	0	0	0	0	0	0	0	0	0	0	0	0	0	350.46	0	0	59.7881	0	0	0	0	0	0	0	0	0	0	0	0	0	0	0	0	0	0	75.3397	75.5484	247.812	23.9511
pygm	chr19_6386056_6386085	44.3909	120.439	151.094	129.432	697.699	0	0	0	0	0	0	0	0	0	0	0	0	0	0	0	243.375	0	0	29.8941	0	0	104.223	0	0	0	0	0	0	0	0	0	0	0	0	0	0	0	75.3397	75.5484	49.5625	95.8043
scgb3a1	chr11_49664501_49664530	88.7818	165.699	183.401	195.176	335.383	0	50.9907	0	0	0	0	0	0	0	0	0	0	0	0.588496	0	317.778	234.456	329.53	29.8941	0	0	52.1114	0	0	0	0	0	0	0	0	0	0	0	0	0	0	0	226.019	37.7742	0	0
mrgpra1	chr7_47335552_47335581	44.3909	231.672	134.153	277.811	54.4555	0	0	0	0	0	0	0	0	0	0	0	0	0	0.588496	0	168.508	0	0	0	0	0	0	0	0	0	0	0	0	0	0	0	0	0	0	0	0	0	0	188.871	0	71.8532
car3	chr3_14871577_14871606	44.3909	174.649	255.501	216.405	198.556	0	0	0	137.408	0	0	0	0	0	0	0	0	0	0	0	297.613	0	109.843	59.7881	0	0	0	0.256576	0	0	0	0	0	0	0	0	0	0	0	0	0	0	150.679	37.7742	0	47.9021
cd300lg	chr11_102043133_102043162	44.3909	135.014	228.71	53.6447	33.8135	0	0	0	0	0	0	0	0	0	0	0	0	0	0	0	231.09	0	0	0	0.247353	0	0	0	0	0	0	0	0	0	0	0	0	0	0	0	0	0	0	0	0	0
nts	chr10_102487949_102487978	44.3909	175.416	102.634	34.4696	32.2408	18.6545	0	0	68.704	0	0	0	0	0	0	0	0	0	0.588496	0	104.303	0	0	29.8941	0	0	0	0	0	0	0	0	0	0	0	0	0	0	0	0	0	0	0	0	0	23.9511
hmgcs2	chr3_98296244_98296273	44.3909	205.845	99.482	60.2647	426.208	0	0	0	0	0	0	0	0	0	0	0	0	0	0	0	287.182	0	0	59.7881	0	0	104.223	0.256576	0	0	0	0	0	0	0	0	0	0	0	0	0	0	75.3397	0	148.687	23.9511
rnf186	chr4_138967549_138967578	88.7818	294.832	224.179	312.509	294.885	9.32726	0	0	0	0	19737.9	0	0	0	0	0	0	0	0	0	390.79	117.228	329.53	29.8941	0.247353	0	104.223	0	0	0	0	0	0	0	0	0	0	0	0	0	0	0	0	0	99.1249	71.8532
muc5b	chr7_141844755_141844784	88.7818	125.297	81.9495	117.562	74.7043	0	0	0	0	0	0	0	0	0	0	0	0	0	0	0	167.117	117.228	0	0	0	0.257055	0	0	0	0	0	0	0	0	0	0	0	0	0	0	0	0	75.3397	0	0	0
mmrn1	chr6_60971121_60971150	44.3909	366.942	258.062	283.062	417.558	9.32726	0	0	0	0	0	0	0	0	0	0	0	0.481508	0.588496	0	322.645	0	0	59.7881	40.3185	0	52.1114	0.256576	0	0	0	0	0	0	0	0	0	0	0	0	0	0	75.3397	37.7742	99.1249	95.8043
plcxd3	chr15_4375784_4375813	44.3909	165.699	154.443	82.864	415.199	0	0	0	68.704	0	0	0	8.20746	0	7598.77	0	0	0	0	0	136.058	0	0	0	0	0	0	0	0	0	0	0	0	0	0	0	0	0	0	0	0	0	150.679	75.5484	49.5625	23.9511
abca6	chr11_110196695_110196724	44.3909	138.594	128.44	110.257	112.843	0	0	0	0	0	0	0	0	0	0	0	0	0	0	0	100.131	0	0	29.8941	0	0	0	0	0	0	0	0	0	0	0	0	0	0	0	0	0	0	0	0	49.5625	0
hba-a2	chr11_32296557_32296586	44.3909	359.782	290.172	270.05	399.472	18.6545	0	0	137.408	0	48807	0	0	0	6.49467	46.0895	0	0	0.588496	0	371.552	234.456	0	119.576	0	0.257055	104.223	0	0	0	0	0	0	0	0	0	0	0	0	0	0	0	150.679	37.7742	148.687	47.9021
kcnip2	chr19_45794034_45794063	44.3909	98.192	77.8127	115.964	89.4486	0	0	0	0	0	0	0	0	0	0	0	0	0	0	0	89.0056	0	0	0	0	0	0	0	0	0	0	0	0	0	0	0	0	0	0	0	0	0	0	37.7742	0	0
syne3	chr12_104955682_104955711	44.3909	547.983	438.903	434.408	339.905	37.309	12288.8	0	137.408	0	0	0	0	0	0	0	0	0.963017	0	0	378.506	117.228	0	29.8941	0.494705	0	104.223	0	0	0	0	0	0	0	0	0	0	0	0	0	0	0	226.019	75.5484	247.812	47.9021
pde3b	chr7_114416111_114416140	44.3909	305.572	470.422	279.181	622.602	0	0	0	137.408	0	0	0	0	0	0	0	0	0	0.588496	0	684.231	234.456	0	119.576	0.247353	0	156.334	0	0	0	0	0	0	0	0	0	0	0	0	0	0	0	301.359	151.097	49.5625	23.9511
itih5	chr2_10238655_10238684	44.3909	270.54	214.527	140.846	215.66	0	0	0	68.704	0	0	0	0	0	0	0	0	0.481508	1.17699	0	58.41	0	0	0	0	0.257055	0	0	0	0	0	0	0	51.7309	0	5.18838	0	0	0	5.45933	10223.2	0	226.019	37.7742	0	0
tnc	chr4_64017490_64017519	44.3909	238.832	138.093	318.216	146.46	9.32726	0	0	137.408	0	0	0	0	0	0	0	0	0	0	0	264.004	0	0	29.8941	0	0	156.334	34.8943	0	0	0	0	0	0	0	0	0	0	0	0	0	0	0	37.7742	0	95.8043
inmt	chr6_55171183_55171212	44.3909	143.708	243.879	37.2089	172.999	0	0	0	0	0	0	0	0	0	0	0	0	0	0.588496	0	146.025	0	0	0	0	0	52.1114	0	0	0	0	0	0	0	0	0	0	0	0	0	0	0	226.019	0	0	23.9511
col6a6	chr9_105782194_105782223	44.3909	160.073	178.674	122.812	258.32	0	0	0	0	0	0	0	0	0	0	0	0	0	0	0	182.183	117.228	0	0	0	0	0	0	0	0	0	0	0	0	0	0	0	0	0	0	0	0	150.679	75.5484	0	47.9021
gabre	chrX_72264552_72264581	44.3909	57.5344	20.0934	22.1427	332.041	0	0	0	0	0	0	0	0	0	0	0	0	0	0	0	59.3371	0	0	0	0.247353	0	52.1114	0	0	0	0	0	0	0	0	0	0	0	0	0	0	0	0	37.7742	0	47.9021
mrgprb8	chr7_48388861_48388890	44.3909	35.5435	75.4487	0	0	0	0	0	0	0	0	0	0	0	0	0	0	0	0	0	124.469	0	0	0	0	0	52.1114	0.513151	0	0	0	0	0	0	0	0	0	0	0	0	0	0	75.3397	0	0	0
aoc3	chr11_101335777_101335806	44.3909	238.065	201.131	158.88	139.579	0	0	0	0	0	0	0	0	0	0	0	0	0	0.588496	0	143.012	0	0	0	19.0462	0.257055	52.1114	0	0	0	0	0	0	0	0	0	0	0	0	0	0	0	301.359	37.7742	0	47.9021
palb2	chr7_122128194_122128223	44.3909	54.7216	142.427	11.8703	76.4736	0	0	0	0	0	0	0	0	0	0	0	0	0	0	0	79.7342	0	0	29.8941	0	0.257055	0	0	0	0	0	0	0	0	0	0	0	0	0	0	0	0	0	37.7742	99.1249	23.9511
palb2	chr7_122128908_122128937	44.3909	99.2149	215.512	0	0	9.32726	0	0	0	0	0	0	0	0	0	0	0	0	0	0	68.3767	0	0	0	0	0	0	67.4794	0	0	0	0	0	0	0	0	0	0	0	0	0	0	0	0	49.5625	23.9511
nsg1	chr5_38155620_38155649	44.3909	120.183	141.245	112.083	89.4486	18.6545	50.9907	0	0	0	0	0	0	0	0	0	0	0	0	0	224.137	0	109.843	0	0	0.257055	0	0.256576	0	0	0	0	0	0	0	0	0	0	0	0	0	0	150.679	0	0	23.9511
cma1	chr14_55941760_55941789	44.3909	226.046	245.258	150.434	60.943	18.6545	50.9907	0	68.704	0	0	0	0	0	0	0	0	0	0	0	239.666	117.228	0	89.6822	0.494705	0	0	0	0	0	0	0	0	0	0	0	0	0	0	0	0	0	0	0	0	0
plcg1	chr2_160751140_160751169	44.3909	231.416	134.744	112.996	19.2659	0	0	0	0	0	0	0	0	0	0	0	0	0.481508	0	0	190.296	0	0	59.7881	0	306.666	52.1114	11.2893	0	0	0	0	0	0	0	0	0	0	0	0	0	0	75.3397	0	49.5625	0
cntnap3	chr13_64787835_64787864	44.3909	223.745	170.991	28.0779	109.501	9.32726	0	0	0	0	0	0	0	0	0	0	0	0.481508	0.588496	0	240.825	117.228	109.843	0	0	0	0	0	0	0	0	0	0	0	0	0	0	0	0	0	0	0	150.679	0	0	47.9021
polq	chr16_37040598_37040627	44.3909	115.069	131.592	103.637	219.198	0	0	0	0	0	0	0	0	0	0	0	0	0.481508	0	0	162.482	0	0	0	0	30.0754	0	0	0	0	0	0	0	0	0	0	0	0	0	0	0	0	150.679	0	49.5625	0
marco	chr1_120488553_120488582	88.7818	370.777	341.391	1452.97	175.555	0	0	0	0	0	0	0	0	0	0	0	0	0	0	0	422.545	117.228	0	59.7881	0	0.257055	104.223	0.513151	0	0	0	0	0	0	0	0	0	0	0	0	0	0	678.057	37.7742	99.1249	239.511
adam33	chr2_131053976_131054005	44.3909	250.339	213.936	203.165	194.624	9.32726	0	0	68.704	0	0	0	0	0	0	0	0	0	0	0	412.115	117.228	219.687	29.8941	0.247353	0	104.223	0	0	0	2.2401	291.971	0	0	0	0	0	0	0	0	0	0	226.019	113.323	99.1249	0
plin4	chr17_56104466_56104495	44.3909	97.9363	134.744	68.7109	345.802	0	0	0	0	0	0	0	0	0	0	0	0	0	0	0	140.23	0	109.843	59.7881	0	0	0	0.513151	0	0	0	0	0	0	0	0	0	0	0	0	0	0	150.679	37.7742	49.5625	0
arhgap36	chrX_49495355_49495384	88.7818	259.288	132.971	245.853	69.0032	9.32726	0	0	68.704	0	0	0	0	0	0	0	0	0	0	0	275.593	0	0	0	0.247353	0	0	0.256576	0	0	0	0	0	0	0	0	0	0	0	0	0	0	75.3397	37.7742	0	71.8532
plin1	chr7_79725704_79725733	44.3909	96.4021	134.744	153.858	222.737	0	0	0	0	0	0	0	0	0	0	0	0	0	0	0	168.74	0	109.843	29.8941	173.642	0.257055	0	0.256576	0	0	0	0	0	0	0	0	0	0	0	0	0	0	0	0	99.1249	0
nf1	chr11_79339999_79340028	44.3909	470.248	454.071	122.584	224.31	0	0	0	137.408	0	0	0	4.10373	22235.8	25.9787	184.358	72.9928	0	0.588496	0	432.744	0	0	29.8941	0.494705	0.514109	104.223	0	0	113.081	1.12005	0	74.3683	0	36.2209	15.5651	0	0	438.01	27.2966	42.3029	0	75.3397	37.7742	545.187	215.56
cdk12	chr11_98204242_98204271	44.3909	131.69	168.627	26.2517	174.572	0	0	0	68.704	0	0	0	0	0	0	0	0	0.481508	0	0	200.494	117.228	0	0	0	0	0	0	0	0	0	0	0	0	0	0	0	0	0	0	0	0	0	0	0	0
meox1	chr11_101893717_101893746	88.7818	251.617	246.834	222.112	138.4	0	0	0	137.408	0	0	0	0	0	0	0	0	0	0	0	247.779	0	109.843	29.8941	0	0	52.1114	0	0	0	0	0	0	0	0	0	0	0	0	0	0	0	75.3397	0	99.1249	23.9511
zbtb16	chr9_48657191_48657220	88.7818	15.3425	32.11	0	53.6692	0	0	0	0	0	0	0	0	0	0	0	0	0	0	0	30.8275	117.228	0	29.8941	492.232	0	0	0	0	0	0	0	0	0	0	0	0	0	0	0	0	0	0	37.7742	0	0
meox2	chr12_37108977_37109006	44.3909	202.265	196.206	249.733	203.274	0	50.9907	0	0	0	0	0	0	0	0	0	0	0.481508	0.588496	0	137.912	0	0	29.8941	0	0	104.223	0	0	0	0	0	0	0	0	0	0	0	0	0	0	0	0	113.323	99.1249	71.8532
hba-a2	chr11_32296810_32296839	44.3909	181.042	161.929	139.705	133.485	18.6545	0	0	0	0	0	0	0	0	0	0	0	0	0	0	214.865	0	0	0	0.247353	0.257055	0	0	0	0	0	0	0	0	0	0	0	0	0	0	0	0	75.3397	75.5484	0	0
cryab	chr9_50753441_50753470	44.3909	270.795	170.4	98.8433	114.219	9.32726	0	0	0	0	0	0	0	0	0	0	0	0	0	0	220.66	0	0	0	0.247353	0	0	0.256576	0	0	0	0	0	0	0	0	0	0	0	0	0	0	150.679	0	0	47.9021
cdh20	chr1_104942085_104942114	44.3909	122.74	102.831	48.1661	45.8055	0	0	0	68.704	0	0	0	0	0	0	0	0	0	0	0	172.68	0	0	29.8941	0	0	52.1114	0.256576	0	0	0	0	0	0	0	0	0	0	0	0	0	0	150.679	0	0	0
sstr1	chr12_58212730_58212759	44.3909	370.777	271.458	545.35	432.302	9.32726	0	0	0	0	0	0	0	0	0	0	0	1.44453	0.588496	0	254.964	234.456	109.843	0	1.73147	0.771164	260.557	1028.87	480.922	0	0	0	0	0	0	0	0	0	0	0	0	0	226.019	75.5484	148.687	47.9021
plp1	chrX_136832098_136832127	44.3909	379.471	266.73	1692.66	350.324	0	50.9907	0	68.704	0	0	0	0	0	0	0	0	0.963017	0	0	537.511	117.228	0	0	17.3147	0.514109	208.446	0	96.1845	0	0	0	0	0	0	0	0	0	0	0	0	0	376.698	188.871	446.062	167.657
nat8l	chr5_33997105_33997134	44.3909	267.982	214.133	212.296	145.28	0	0	0	0	0	0	0	0	0	0	0	0	0.481508	0.588496	0	194.004	0	0	59.7881	0	0.257055	0	0	0	0	0	0	0	0	0	0	0	0	0	0	0	0	75.3397	37.7742	99.1249	0
rasgef1c	chr11_49957126_49957155	44.3909	198.685	229.695	140.389	232.37	9.32726	50.9907	0	0	0	0	0	0	0	0	0	0	0.481508	0	0	242.216	0	0	0	69.0114	0	0	0	0	0	0	0	0	0	0	0	0	0	0	0	0	0	150.679	0	99.1249	23.9511
dnah11	chr12_118020347_118020376	44.3909	321.681	129.031	168.696	13.1716	0	0	0	68.704	0	0	0	0	0	0	0	0	0.481508	0	0	137.449	0	0	59.7881	0.247353	0	52.1114	0.256576	0	0	0	0	0	0	0	0	0	0	0	0	0	0	150.679	0	0	0
plac9b	chr14_26170138_26170167	44.3909	83.8724	133.562	185.36	49.1476	0	0	0	0	0	0	0	0	0	0	0	0	0	0	0	114.27	0	0	0	0	0	0	0	0	0	0	0	0	0	0	0	0	0	0	0	0	0	0	0	0	0
1700019d03rik	chr1_52925380_52925409	44.3909	309.919	240.333	575.939	246.721	0	0	0	0	0	0	0	0	0	0	0	0	0.481508	0.588496	0	343.043	0	219.687	29.8941	0	0	52.1114	0	0	0	0	0	0	0	0	0	0	0	0	0	0	0	75.3397	113.323	198.25	71.8532
mia	chr7_27180746_27180775	44.3909	82.3381	69.7359	59.3516	68.8066	0	0	0	0	0	0	0	0	0	0	0	0	0	0.588496	0	78.1117	0	0	29.8941	0	0	0	0	0	0	0	0	0	0	0	0	0	0	0	0	0	0	0	37.7742	0	0
chl1	chr6_103675000_103675029	44.3909	219.398	180.25	167.326	477.125	0	0	0	68.704	0	0	0	0	0	0	0	0	0	0	0	117.052	0	0	0	0	0	52.1114	0.256576	0	0	0	0	0	0	0	0	0	0	0	0	0	0	0	113.323	0	71.8532
sdhb	chr4_140973651_140973680	44.3909	2.81279	25.0182	0	0	0	0	0	0	0	0	0	0	0	0	0	0	0	0	0	34.0725	0	0	0	0	0	0	0	0	0	0	0	0	0	0	0	0	0	0	0	0	0	0	0	0	0
aadac	chr3_60039633_60039662	44.3909	144.475	57.1283	102.952	69.593	9.32726	0	0	0	0	0	0	0	0	0	0	0	0	0	0	82.0521	0	0	0	0	0.257055	52.1114	0	0	0	0	0	0	0	0	0	0	0	0	0	0	0	301.359	0	0	0
klhl31	chr9_77650812_77650841	44.3909	162.375	149.322	57.2971	73.5248	0	0	0	68.704	0	0	0	0	0	0	0	0	0	1.17699	0	148.806	0	109.843	0	39.3291	144.722	0	0	0	0	0	0	0	0	0	0	0	0	0	0	0	0	75.3397	75.5484	0	0
exosc6	chr8_111056412_111056441	44.3909	217.608	411.127	35.611	113.039	0	0	0	0	0	0	0	0	0	0	0	0	0	0	0	210.693	0	109.843	0	0.247353	0.514109	52.1114	0.513151	0	0	0	0	0	0	0	0	0	0	0	0	0	0	75.3397	75.5484	0	0
trrap	chr5_144820314_144820343	44.3909	73.644	230.877	84.2336	44.626	9.32726	0	0	68.704	0	0	0	0	0	0	0	0	0	0.588496	0	68.1449	0	0	0	0	0	0	0	0	0	0	0	0	0	0	0	0	0	0	0	0	0	150.679	37.7742	0	23.9511
timp4	chr6_115251744_115251773	44.3909	234.74	215.906	264.8	129.946	0	0	0	68.704	0	0	0	0	0	0	0	0	0	1.17699	0	294.831	117.228	0	0	0	0.257055	0	0.513151	0	0	0	0	0	0	0	0	0	0	0	0	0	0	226.019	0	0	0
nrg2	chr18_36052796_36052825	44.3909	150.868	98.694	410.439	101.244	0	0	0	0	0	31.6312	0	0	0	0	20141.1	0	0	0.588496	0	189.601	0	0	0	0.247353	0	52.1114	0	0	0	0	0	0	0	0	0	0	0	0	0	0	0	226.019	75.5484	0	47.9021
pten	chr19_32811807_32811836	44.3909	254.43	165.475	1228.35	883.477	0	0	0	137.408	0	0	0	0	0	0	0	0	0	0.588496	0	413.042	0	0	29.8941	0	0.514109	0	0	0	0	0	0	0	0	0	0	0	0	0	0	0	0	75.3397	226.645	247.812	263.462
wif1	chr10_121075273_121075302	44.3909	116.347	194.433	169.837	178.897	3824.17	50.9907	0	68.704	0	0	0	0	0	0	0	0	1.44453	1.17699	0	259.136	3047.92	0	29.8941	177.847	0	0	0	1058.03	0	0	0	0	0	0	0	0	0	0	0	0	0	75.3397	151.097	49.5625	71.8532
hcar2	chr5_123865244_123865273	44.3909	79.5253	45.1116	110.257	208.976	0	0	0	0	0	0	0	0	0	0	0	0	0	0	0	63.2774	0	0	59.7881	0	0	0	0	0	0	0	0	0	0	0	0	0	0	0	0	0	0	0	0	0	0
stac2	chr11_98041339_98041368	44.3909	185.133	191.478	132.628	20.4454	0	0	0	0	0	0	0	0	0	0	0	0	0.481508	0	0	239.898	0	0	29.8941	0.494705	0	52.1114	0	0	0	0	0	0	0	0	0	0	0	0	0	0	0	226.019	0	49.5625	0
col6a6	chr9_105782192_105782221	44.3909	110.977	107.756	205.676	448.226	0	0	0	68.704	0	0	0	0	0	0	0	0	0	0	0	48.2114	0	0	0	0	0	52.1114	0	0	0	0	0	0	0	0	0	0	0	0	0	0	0	0	0	49.5625	47.9021
rnf186	chr4_138967244_138967273	44.3909	271.307	399.504	233.526	736.821	0	0	0	137.408	0	0	0	0	0	0	0	0	0	0	0	348.142	0	0	29.8941	0.247353	0	52.1114	0	0	0	0	0	0	0	0	0	0	0	0	0	0	0	75.3397	75.5484	0	71.8532
cryab	chr9_50754593_50754622	44.3909	220.421	231.665	222.34	110.484	0	0	0	0	0	0	0	0	0	0	0	0	0	0.588496	0	271.653	0	109.843	29.8941	34.1347	0	52.1114	0	0	0	0	0	0	0	0	0	0	0	0	0	0	0	226.019	37.7742	49.5625	23.9511
tpr	chr1_150414498_150414527	44.3909	51.3974	115.439	83.0923	50.3271	0	0	0	0	0	0	0	0	0	0	0	0	0	0	0	39.6353	0	0	0	0	0	0	0	0	0	0	0	0	0	0	0	0	0	0	0	0	0	0	0	0	0
cd36	chr5_17820523_17820552	88.7818	149.845	101.058	85.8316	60.7464	0	50.9907	0	0	0	0	0	0	0	0	0	0	0	0	0	90.3964	117.228	0	0	8.65734	0	52.1114	0	0	0	0	0	0	0	0	0	0	0	0	0	0	0	0	37.7742	49.5625	47.9021
adcy5	chr16_35156225_35156254	44.3909	471.782	478.499	887.535	316.117	9.32726	0	0	0	0	0	0	0	0	0	0	0	0	0	0	98.9724	0	0	29.8941	0.247353	0	1407.01	0	0	0	0	0	0	0	0	0	0	0	0	0	0	0	376.698	226.645	99.1249	167.657
ryr3	chr2_112750851_112750880	88.7818	393.535	317.357	416.146	607.071	27.9818	0	0	68.704	0	0	0	0	0	0	0	0	0	0	0	143.475	234.456	219.687	89.6822	699.019	879.126	260.557	0.769727	0	0	0	0	0	0	0	0	0	0	0	0	0	0	226.019	37.7742	198.25	47.9021
hoxa5	chr6_52202646_52202675	44.3909	76.9682	83.7225	80.8095	263.234	0	0	0	0	0	0	0	0	0	0	0	0	0	0	0	77.8799	0	0	0	0	0	0	0.513151	0	0	0	0	0	0	0	0	0	0	0	0	0	0	0	0	49.5625	23.9511
igf1	chr10_87861290_87861319	44.3909	167.489	147.155	261.832	130.143	0	0	0	0	0	0	0	0	0	0	0	0	0	0	0	174.071	0	0	0	0	0	0	0	0	0	0	0	0	0	0	0	0	0	0	0	0	0	0	0	49.5625	0
pi16	chr17_29327299_29327328	44.3909	102.283	194.433	63.004	396.129	0	0	0	0	0	0	0	0	0	0	0	0	0	0	0	96.6546	0	0	0	0	0	52.1114	0.256576	0	0	0	0	0	0	0	0	0	0	0	0	112.808	0	226.019	0	49.5625	23.9511
ces1b	chr8_93071879_93071908	44.3909	212.749	200.343	579.591	285.842	0	0	0	274.816	0	0	0	0	0	0	0	0	0	0	0	229.004	0	109.843	29.8941	0	0	0	0.256576	0	0	0	0	0	0	0	0	0	0	0	0	0	0	75.3397	0	49.5625	47.9021
hspb6	chr7_30553408_30553437	44.3909	450.303	324.843	684.826	235.122	18.6545	0	0	0	0	0	0	0	0	0	0	0	0	0.588496	0	317.314	0	0	29.8941	0.494705	0	156.334	0	0	0	0	0	0	0	0	0	0	0	0	0	0	0	226.019	151.097	198.25	71.8532
stag2	chrX_42217319_42217348	44.3909	131.178	143.806	84.2336	197.377	9.32726	0	0	137.408	0	0	0	0	0	0	0	0	0	0	0	203.276	0	109.843	0	0	0	52.1114	0	0	0	0	0	0	0	0	0	0	0	0	0	0	0	0	0	0	23.9511
rpl37a	chr1_72711780_72711809	44.3909	10.2283	308.887	30.1324	0.19659	0	0	0	0	0	0	0	0	0	0	0	0	0	0	0	89.701	0	0	29.8941	0	0	0	0	0	0	0	0	0	0	0	0	0	0	0	0	0	0	0	37.7742	49.5625	0
tubb2b	chr13_34128186_34128215	44.3909	170.046	99.876	89.7123	93.577	0	0	0	0	0	0	0	0	0	0	0	0	0	0	0	140.462	0	0	0	0	0	0	0	0	0	0	0	0	0	0	0	0	0	0	0	0	0	0	0	0	0
kcne1	chr16_92348792_92348821	44.3909	232.95	219.648	169.609	177.324	0	50.9907	0	0	0	0	0	0	0	0	0	0	0	0	0	241.984	0	0	59.7881	0.247353	0.514109	104.223	0.256576	0	0	0	0	0	0	0	0	0	0	0	0	0	0	75.3397	37.7742	148.687	27160.5
pi16	chr17_29319225_29319254	44.3909	85.6623	92.3902	49.5358	356.025	0	0	0	0	0	0	0	0	0	0	0	0	0	0	0	175.693	234.456	0	0	0	0.257055	0	0.256576	0	0	0	0	0	0	0	0	0	0	0	0	0	0	150.679	37.7742	148.687	23.9511
tnmd	chrX_133864794_133864823	44.3909	274.119	254.91	321.64	140.562	0	0	0	137.408	0	0	0	0	0	0	0	0	0	0	0	234.335	0	0	29.8941	0	0.514109	0	0	0	0	0	218.978	0	0	0	1530.57	0	0	0	0	0	0	75.3397	113.323	0	95.8043
ccl28	chr13_119650891_119650920	44.3909	124.786	76.8277	133.998	20.2488	0	0	0	0	0	0	0	0	0	0	0	0	0	0	0	204.435	0	0	29.8941	0	0	0	0	0	0	0	0	0	0	0	0	0	0	0	0	0	0	75.3397	0	49.5625	23.9511
ppp1r1a	chr15_103532427_103532456	44.3909	274.887	206.647	450.159	68.2168	0	0	0	0	0	0	0	0	0	0	0	0	0.481508	0	0	235.958	117.228	0	29.8941	0	0	104.223	0	0	0	0	0	0	0	0	0	0	0	0	0	0	0	150.679	37.7742	0	23.9511
bhmt2	chr13_93671424_93671453	44.3909	144.731	119.772	115.507	109.304	0	0	0	0	0	0	0	0	0	0	0	0	0.481508	0	0	98.0453	0	0	29.8941	0	0	0	0	0	0	0	0	0	0	0	0	0	0	0	0	0	0	0	37.7742	49.5625	47.9021
timp4	chr6_115251689_115251718	44.3909	419.106	454.465	277.126	128.963	0	50.9907	0	68.704	0	0	0	0	0	0	0	0	0.481508	0	0	533.107	0	109.843	59.7881	0	0	0	0	0	0	0	0	0	0	0	0	0	0	0	0	0	0	75.3397	37.7742	0	23.9511
marco	chr1_120493621_120493650	44.3909	203.288	223.982	252.244	89.252	0	0	0	0	0	0	0	0	0	0	0	0	0.963017	0	0	251.951	117.228	0	59.7881	0.247353	0.257055	0	0.256576	0	0	0	0	0	0	0	0	0	0	0	0	0	0	75.3397	0	49.5625	23.9511
myoc	chr1_162639359_162639388	44.3909	149.589	127.652	102.496	135.451	0	0	0	0	0	0	0	0	0	0	0	0	0	0	0	129.568	0	0	0	0	0.257055	0	0	0	0	0	0	0	0	0	0	0	0	0	0	0	0	0	37.7742	49.5625	23.9511
folr1	chr7_101859440_101859469	88.7818	496.074	407.581	479.835	458.645	9.32726	0	0	68.704	0	0	0	0	0	0	0	0	0	0	0	318.937	0	0	89.6822	0.247353	0	52.1114	0	0	0	0	0	0	0	0	0	0	0	0	0	0	0	150.679	226.645	247.812	0
igfbp6	chr15_102147878_102147907	44.3909	278.978	160.747	114.823	197.18	27.9818	0	0	0	0	0	0	0	0	0	0	0	0	0.588496	0	124.701	117.228	0	0	0.494705	0	0	0	0	0	0	0	0	0	0	0	0	0	0	0	0	0	0	37.7742	49.5625	45722.6
syne3	chr12_104961432_104961461	44.3909	292.019	261.805	352.001	112.056	0	0	0	0	0	0	0	0	0	0	0	0	0	0	0	178.707	0	0	0	0	0.514109	104.223	0	0	0	0	0	0	0	0	0	0	0	0	0	0	0	0	0	49.5625	47.9021
grin2a	chr16_9657765_9657794	44.3909	131.69	128.637	45.6551	91.4145	0	0	0	68.704	0	0	0	0	0	0	0	0	0	0	0	134.204	117.228	0	0	60.1067	0	52.1114	0	0	0	0	0	0	0	0	0	0	0	0	0	0	0	0	0	0	23.9511
synm	chr7_67759435_67759464	44.3909	333.188	238.954	183.077	10.0261	18.6545	50.9907	0	0	0	0	0	0	0	0	0	0	0.481508	0	0	261.222	0	0	29.8941	0.247353	0	52.1114	0	0	0	0	0	0	0	0	0	0	0	0	0	0	0	0	37.7742	49.5625	47.9021
nsd1	chr13_55238706_55238735	44.3909	98.4478	56.3403	0	131.322	0	0	0	0	0	0	0	0	0	0	0	0	0	0	0	117.747	0	0	0	0	0	0	0	0	0	0	0	0	0	0	0	0	0	0	0	0	0	0	37.7742	0	23.9511
sema3d	chr5_12577695_12577724	44.3909	140.128	160.156	212.753	111.27	0	0	0	0	0	0	0	0	0	0	0	0	0	0	0	218.342	117.228	109.843	0	0.247353	0.257055	0	0	0	0	0	0	0	0	0	0	0	0	0	0	0	0	150.679	113.323	49.5625	0
scgb3a1	chr11_49664398_49664427	44.3909	378.449	313.418	367.067	165.332	9.32726	50.9907	0	68.704	0	0	0	0	0	0	0	0	0	0.588496	0	176.852	0	0	59.7881	0.247353	0.257055	0	0	0	0	0	0	0	0	0	0	0	0	0	0	0	0	150.679	37.7742	49.5625	47.9021
grin2a	chr16_9669708_9669737	44.3909	182.576	126.076	284.888	180.666	0	0	0	68.704	0	0	0	0	0	0	0	0	0	0	0	162.945	0	0	29.8941	13.6044	0	104.223	0	0	0	0	0	0	0	0	0	0	0	0	0	0	0	226.019	75.5484	0	23.9511
gpd1	chr15_99722025_99722054	44.3909	151.635	216.496	87.4295	480.27	0	50.9907	0	206.112	0	0	0	0	0	0	0	0	0	0.588496	0	136.29	0	0	59.7881	0	0	0	0	0	0	0	0	0	0	0	0	0	0	0	0	0	0	226.019	0	49.5625	71.8532
atrx	chrX_105853288_105853317	44.3909	89.2423	111.499	9.81584	0	0	0	0	0	0	0	0	0	0	0	0	0	0	0	0	149.502	0	109.843	29.8941	0	0	0	0	0	0	0	0	0	0	0	0	0	0	0	0	0	0	0	37.7742	0	0
car3	chr3_14870125_14870154	44.3909	402.229	393.003	428.473	403.797	9.32726	0	0	68.704	0	0	0	0	0	0	0	0	0.481508	0	0	333.076	0	109.843	59.7881	0	0.257055	5732.26	0	0	0	0	0	0	0	0	0	0	0	0	0	0	0	376.698	0	49.5625	119.755
1700019d03rik	chr1_52925361_52925390	44.3909	106.375	102.831	12.3269	183.222	0	0	0	0	0	0	0	0	0	0	0	0	1.92603	0	0	129.568	117.228	0	29.8941	0.247353	0.257055	0	193.715	0	0	0	0	0	0	0	0	0	0	0	0	0	0	75.3397	0	49.5625	23.9511
klb	chr5_65378937_65378966	88.7818	176.95	251.167	186.729	261.072	9.32726	0	0	0	0	0	0	0	0	0	0	0	0	0	0	188.442	0	0	0	0	0.257055	52.1114	21.2958	0	0	0	0	0	0	0	0	0	0	0	0	0	0	150.679	113.323	0	0
muc6	chr7_141650038_141650067	44.3909	94.8678	62.4471	15.0662	0	9.32726	0	0	0	0	0	0	0	0	0	0	0	0	0.588496	0	111.257	0	0	29.8941	0.247353	0	52.1114	0	0	0	0	0	0	0	0	0	0	0	0	0	0	0	0	0	0	0
pde4dip	chr3_97767259_97767288	44.3909	267.982	229.892	261.375	334.597	0	50.9907	0	68.704	0	0	0	0	0	0	0	0	0	0	0	425.326	0	0	0	0.247353	0	0	0.256576	0	0	0	0	0	0	0	0	0	0	0	0	0	0	75.3397	151.097	49.5625	95.8043
tnc	chr4_64013090_64013119	44.3909	184.622	235.014	10.0441	433.482	9.32726	0	0	0	0	0	0	0	0	0	0	0	0.481508	1.17699	0	175.462	0	109.843	0	0	0	0	0	0	0	0	0	0	0	0	0	0	0	0	0	0	0	150.679	37.7742	49.5625	0
polq	chr16_37060135_37060164	44.3909	93.3336	89.2383	16.4358	98.4917	0	0	0	0	0	0	0	0	0	0	0	0	0	0	0	110.098	234.456	0	0	0	0	0	0	0	0	0	0	0	0	0	0	0	0	0	0	0	0	0	0	0	0
atp2b3	chrX_73536178_73536207	44.3909	225.535	190.69	16.6641	494.031	9.32726	50.9907	0	0	0	0	0	0	0	0	0	0	0	0	0	236.653	0	0	0	0	0	156.334	0	0	0	0	0	0	0	0	0	0	0	0	0	0	0	150.679	0	49.5625	47.9021
kras	chr6_145234327_145234356	44.3909	159.306	123.909	137.422	94.3634	5447.12	101.981	0	68.704	0	0	0	0	0	0	0	0	0.963017	0.588496	0	196.554	3751.29	0	0	0	0	3387.24	0.256576	1827.5	0	0	0	0	0	0	0	0	0	0	0	0	0	75.3397	37.7742	148.687	23.9511
igsf10	chr3_59328254_59328283	44.3909	282.814	228.71	186.958	348.555	9.32726	0	0	0	0	0	0	0	0	0	0	0	0	0	0	149.733	0	0	0	0	0.514109	0	0	0	0	0	0	0	0	0	0	0	0	0	0	0	0	150.679	0	0	23.9511
mrap	chr16_90747553_90747582	44.3909	173.882	114.257	118.018	303.339	0	0	0	0	0	0	0	0	0	0	0	0	0	0	0	173.607	0	0	29.8941	0	0	52.1114	0	0	0	0	0	0	0	0	0	0	0	0	0	0	0	226.019	37.7742	49.5625	0
spdef	chr17_27720147_27720176	44.3909	97.4249	148.337	166.413	62.1225	0	0	0	0	0	0	0	0	0	0	0	0	0	0	0	192.382	0	109.843	59.7881	0	0.257055	52.1114	0	0	0	0	0	0	0	0	0	0	0	0	0	0	0	75.3397	0	0	23.9511
acacb	chr5_114200335_114200364	44.3909	152.402	192.266	34.2413	79.8157	0	0	0	0	0	0	0	0	0	0	0	0	0	0	0	233.64	117.228	0	29.8941	0	0	52.1114	0	0	0	0	0	0	0	0	0	0	0	0	0	0	0	0	0	0	0
acacb	chr5_114224030_114224059	44.3909	378.96	328.192	494.445	642.457	0	0	0	68.704	0	0	0	0	0	0	0	0	0	0	0	344.433	234.456	0	0	0.247353	0.257055	0	0	0	0	0	0	0	0	0	0	0	0	0	0	0	0	226.019	37.7742	148.687	47.9021
aldh3a1	chr11_61213453_61213482	44.3909	278.211	187.341	298.813	140.169	18.6545	0	0	137.408	0	0	0	0	0	0	0	0	0	0	0	243.838	117.228	0	59.7881	0	0	0	0.513151	0	0	0	0	0	0	0	0	0	0	0	0	0	0	75.3397	37.7742	49.5625	0
gpx3	chr11_54909606_54909635	44.3909	148.311	145.185	99.9846	143.511	0	0	0	68.704	0	0	0	0	0	0	0	0	0	0.588496	0	148.111	117.228	0	29.8941	0	0	0	0	0	0	0	0	0	0	0	0	0	0	0	0	0	0	0	0	99.1249	0
hspb6	chr7_30554318_30554347	44.3909	111.489	87.0714	69.1675	150.588	0	0	0	0	0	0	0	0	0	0	0	0	0.481508	0.588496	0	17.8475	0	0	0	0.247353	0	52.1114	0	0	0	0	0	0	0	0	0	0	0	0	0	0	0	0	0	49.5625	0
flt4	chr11_49634185_49634214	44.3909	275.909	238.363	376.426	311.792	9.32726	0	0	68.704	0	0	0	0	0	0	0	0	0	0.588496	0	131.191	0	0	0	0	0.257055	0	0.256576	0	0	0	0	0	0	0	0	0	0	0	0	0	0	301.359	37.7742	0	0
kcnj16	chr11_111025125_111025154	44.3909	302.503	152.276	348.12	294.099	0	0	0	0	0	0	0	0	0	0	0	0	0	0	0	212.547	0	0	29.8941	0	0.257055	52.1114	0.256576	0	0	0	0	0	0	0	0	0	0	0	0	0	0	0	37.7742	99.1249	119.755
erbb4	chr1_68349349_68349378	44.3909	195.873	203.692	85.375	0.19659	0	0	0	0	0	0	0	0	0	0	0	0	0	0	0	252.183	0	0	0	0	0.257055	52.1114	0	0	0	0	0	0	0	0	0	0	0	0	0	0	0	0	0	0	23.9511
scara5	chr14_65731154_65731183	44.3909	402.997	267.912	435.55	186.957	0	0	0	0	0	0	0	0	0	0	0	0	0.481508	0	0	400.989	0	0	119.576	79.4002	0	0	0.256576	0	0	0	0	0	0	0	0	0	0	0	0	0	0	0	0	99.1249	47.9021
saa4	chr7_46731598_46731627	133.173	248.549	188.72	239.689	286.432	0	101.981	0	0	0	0	0	0	0	0	0	0	0	0	0	332.38	117.228	0	29.8941	37.3503	0	52.1114	0	0	0	0	0	0	0	0	0	0	0	0	0	0	0	0	0	0	23.9511
runx1	chr16_92695561_92695590	133.173	317.59	321.494	120.986	173.982	0	50.9907	0	0	0	0	0	0	0	0	0	0	0	0.588496	0	270.725	117.228	0	0	0	0.257055	52.1114	0.256576	0	0	0	0	0	0	0	0	0	0	0	0	0	0	75.3397	0	49.5625	71.8532
il33	chr19_29949701_29949730	44.3909	318.357	262.987	211.155	156.486	0	50.9907	0	0	0	0	0	0	0	0	0	0	0.481508	0	0	231.786	0	0	29.8941	0	0	0	0	0	0	0	0	0	0	0	0	0	0	0	0	0	0	75.3397	75.5484	99.1249	71.8532
gria1	chr11_57015233_57015262	44.3909	163.398	115.242	160.021	104.783	9.32726	0	0	68.704	0	0	0	0	0	0	0	0	0	0	0	275.361	117.228	109.843	29.8941	0	0	104.223	0	0	0	0	0	0	0	0	0	0	0	0	0	0	0	0	0	0	47.9021
emilin3	chr2_160909658_160909687	44.3909	324.238	314.206	246.537	96.3293	0	0	0	0	0	0	0	0	0	0	0	0	0	0	0	281.156	0	0	29.8941	0	0	52.1114	0.256576	0	0	0	0	0	0	0	0	0	0	0	0	0	0	0	0	0	23.9511
slco1a6	chr6_142102963_142102992	44.3909	119.672	110.908	67.3413	269.722	0	0	0	0	0	0	0	0	0	0	0	0	0	0	0	184.501	117.228	0	29.8941	0	0	0	0.256576	0	0	0	0	0	0	0	0	0	0	0	0	0	0	0	0	99.1249	23.9511
gys2	chr6_142459421_142459450	44.3909	220.932	221.421	182.164	167.495	0	0	0	0	0	0	0	0	0	0	0	0	0	0	0	251.719	0	109.843	29.8941	26.7141	0	52.1114	0	0	0	0	0	0	0	0	0	0	0	0	0	0	0	0	0	99.1249	47.9021
c4bp	chr1_130648135_130648164	44.3909	56.5116	116.424	37.2089	484.005	0	0	0	0	0	0	0	0	0	0	0	0	0	0	0	69.0721	0	0	0	0	0	0	0	0	0	0	0	0	0	0	0	0	0	0	0	0	0	75.3397	151.097	198.25	23.9511
acvr1c	chr2_58296006_58296035	44.3909	78.5025	112.878	218.688	0.393181	0	0	0	0	0	0	0	0	0	0	0	0	0	0	0	149.502	0	109.843	0	95.7255	0	104.223	0.256576	0	0	0	0	0	0	0	0	0	0	0	0	0	0	0	0	0	23.9511
rgs6	chr12_83047556_83047585	88.7818	137.06	196.6	111.855	78.8327	0	0	0	0	0	0	0	0	0	0	0	0	0	0	0	202.117	0	0	29.8941	0	0	0	0	0	0	0	0	0	0	0	0	0	0	0	0	0	0	0	0	49.5625	0
slc22a12	chr19_6540457_6540486	44.3909	168.256	164.096	163.445	333.024	0	0	0	0	0	0	0	0	0	0	0	0	0.481508	0	0	238.739	0	0	0	0	0	0	0	0	0	0	0	0	0	0	0	0	0	0	0	0	0	75.3397	75.5484	49.5625	0
frem1	chr4_82914781_82914810	44.3909	171.58	237.378	141.759	224.113	9.32726	0	0	0	0	0	0	0	0	0	0	0	0	0	0	262.613	234.456	219.687	29.8941	0	0	0	0	0	0	0	0	0	0	0	0	0	0	0	0	0	0	75.3397	113.323	49.5625	47.9021
ncor1	chr11_62373283_62373312	88.7818	138.083	158.58	302.922	295.279	9.32726	0	0	0	0	0	0	0	0	0	0	0	0	0.588496	0	205.826	0	0	119.576	0	0	52.1114	0	0	0	0	0	0	0	0	0	0	0	0	0	0	0	226.019	37.7742	49.5625	71.8532
hba-a2	chr11_32296857_32296886	44.3909	356.202	349.861	272.789	67.2339	0	0	0	0	0	0	0	0	0	0	0	0	0	1.17699	0	240.362	117.228	109.843	0	0.247353	0	0	0	0	0	0	0	0	0	0	0	0	0	0	0	0	0	0	37.7742	49.5625	119.755
ptprz1	chr6_23000241_23000270	44.3909	157.516	162.323	55.2427	97.3122	0	50.9907	0	0	0	0	0	0	0	0	0	0	0.481508	0	0	154.601	117.228	0	0	0	0	52.1114	0	0	0	0	0	0	0	0	0	0	0	0	0	0	0	75.3397	0	49.5625	0
cadm3	chr1_173341676_173341705	44.3909	77.9911	64.4171	48.3944	113.433	0	0	0	0	0	0	0	0	0	0	0	0	0	0	0	47.9796	0	0	0	0.247353	0	0	0	0	0	0	0	0	0	0	0	0	0	0	0	0	0	75.3397	0	0	0
stac2	chr11_98052885_98052914	44.3909	123.763	155.822	163.902	182.043	0	0	0	0	0	0	0	0	0	0	0	0	0	0	0	164.104	234.456	0	0	0	0	0	0	0	0	0	0	0	0	0	0	0	0	0	0	0	0	75.3397	0	198.25	23.9511
ropn1	chr16_34669898_34669927	44.3909	703.71	548.038	552.883	701.827	18.6545	0	0	0	0	0	0	0	0	0	0	0	0.481508	0.588496	0	694.661	234.456	0	119.576	0.247353	0	52.1114	0.513151	0	0	0	0	0	0	0	0	0	0	0	0	0	0	75.3397	75.5484	49.5625	191.609
mrgprb3	chr7_48643375_48643404	88.7818	120.95	135.926	158.423	161.007	27.9818	0	0	0	0	0	0	0	0	0	0	0	0	0	0	338.639	0	0	59.7881	0	0.514109	0	0	0	0	0	0	0	0	0	0	0	0	0	0	0	0	0	37.7742	99.1249	71.8532
ccl21b	chr4_42256124_42256153	44.3909	157.516	257.865	63.004	175.948	0	0	0	0	0	0	0	0	0	0	0	0	0	0	0	104.767	117.228	0	0	0	0	52.1114	0	0	0	0	0	0	0	0	0	0	0	0	0	0	0	226.019	37.7742	0	23.9511
ces1c	chr8_93108530_93108559	88.7818	169.535	174.734	386.014	555.368	0	0	0	0	0	0	0	0	0	0	0	0	0	0	0	263.077	0	109.843	0	0	0	52.1114	0	1587.04	0	0	0	0	0	0	0	0	0	0	0	0	0	75.3397	0	247.812	71.8532
9330159f19rik	chr10_29224635_29224664	44.3909	144.22	72.0998	197.23	69.1998	0	0	0	0	0	0	0	0	0	0	0	0	0	0	0	76.0257	0	0	0	0.247353	0	0	0.256576	0	0	0	0	0	0	0	0	0	0	0	0	0	0	75.3397	0	99.1249	47.9021
arhgap5	chr12_52516641_52516670	44.3909	46.5389	75.6457	53.6447	0.393181	0	0	3.4318	137.408	0	0	0	0	0	0	30188.6	72.9928	0	0.588496	0	119.601	0	0	0	0	0	0	0	0	0	0	0	0	0	0	0	0	0	0	0	0	0	0	0	0	23.9511
hoxa6	chr6_52208440_52208469	44.3909	115.58	117.408	59.5799	247.9	0	0	0	0	0	0	0	0	0	0	0	0	0	0	0	130.032	117.228	109.843	0	0	0	0	0	0	0	0	0	0	0	0	0	0	0	0	0	0	0	150.679	37.7742	49.5625	71.8532
syne1	chr10_5360732_5360761	44.3909	325.261	293.324	201.111	239.054	0	0	0	0	0	0	0	0	0	0	0	0	0.481508	0.588496	0	329.367	117.228	109.843	29.8941	0	0	0	0	0	0	0	0	0	0	0	0	0	0	109.502	4733.24	0	0	75.3397	75.5484	99.1249	47.9021
irx6	chr8_92677428_92677457	44.3909	169.79	175.916	63.9171	105.766	9.32726	152.972	0	0	0	0	0	0	0	0	0	0	830.602	1.17699	0	146.257	1055.05	109.843	0	0	0.257055	885.894	0	432.83	0	0	0	0	0	0	0	0	0	0	0	0	0	75.3397	37.7742	49.5625	23.9511
pcolce2	chr9_95678341_95678370	44.3909	236.019	215.709	270.278	276.996	9.32726	0	3.4318	68.704	0	0	0	0	0	0	0	0	0	0	0	205.13	117.228	219.687	0	8.9047	60.1508	0	0	0	0	0	0	0	0	36.2209	0	0	0	0	0	0	0	75.3397	37.7742	99.1249	0
klhl29	chr12_5093544_5093573	44.3909	62.9043	80.5706	61.1778	0	0	0	0	0	0	0	0	0	0	0	0	0	0	0	0	162.945	0	0	0	0.247353	0	0	0	0	0	0	0	0	0	0	0	0	0	0	0	0	0	75.3397	0	49.5625	0
cav1	chr6_17307925_17307954	44.3909	82.3381	127.061	28.5344	132.305	0	50.9907	0	0	0	0	0	0	0	0	0	0	0	0	0	123.773	0	0	0	0.247353	0	0	0	0	0	0	0	0	0	0	0	0	0	0	0	0	0	0	37.7742	0	0
klk7	chr7_43812981_43813010	44.3909	246.247	285.444	192.436	362.119	9.32726	0	0	274.816	0	1850.43	0	0	0	0	0	0	0	0.588496	0	536.352	117.228	0	0	0.247353	0.514109	0	0	0	0	0	0	0	0	0	0	0	0	0	0	0	0	150.679	37.7742	49.5625	47.9021
grin2a	chr16_9761635_9761664	44.3909	124.53	167.445	182.849	131.126	0	0	0	0	0	0	0	0	0	0	0	0	0	0	0	100.131	0	0	0	0	0	0	0.256576	0	0	0	0	0	0	0	0	0	0	0	0	0	0	0	0	0	0
ppp1r14a	chr7_29291497_29291526	44.3909	275.398	212.754	596.027	207.993	0	0	0	68.704	0	0	0	0	0	0	0	0	0	0.588496	0	184.269	0	0	29.8941	0	0	0	0	0	0	0	0	0	0	0	0	0	0	0	0	0	0	301.359	37.7742	99.1249	0
robo2	chr16_73978490_73978519	44.3909	311.453	240.53	423.223	293.706	9.32726	0	0	0	0	0	0	0	0	0	0	0	0	0	0	231.554	117.228	0	0	0	0	0	0.256576	0	0	0	0	0	0	0	0	0	0	0	0	0	0	226.019	0	148.687	23.9511
ptprc	chr1_138080149_138080178	44.3909	290.485	312.63	403.819	354.846	0	0	0	68.704	0	0	0	0	0	0	0	0	0	0	0	473.074	234.456	109.843	0	0	0	52.1114	0	0	0	0	0	0	0	0	0	0	0	0	0	0	0	150.679	37.7742	49.5625	47.9021
defb22	chr2_152486005_152486034	44.3909	104.329	79.1916	51.5903	80.4054	0	0	0	0	0	0	0	0	0	0	0	0	0.481508	0	0	135.595	0	109.843	29.8941	0	0	0	0	0	0	0	0	0	0	0	0	0	0	0	0	0	0	0	0	49.5625	0
rara	chr11_98970561_98970590	44.3909	112	101.255	50.6771	77.8498	9.32726	50.9907	0	68.704	0	0	0	0	0	0	0	0	0	0	0	99.8996	0	0	0	0	0	0	41.8218	0	0	0	0	0	0	0	0	0	0	0	0	0	0	75.3397	37.7742	49.5625	0
igfbp6	chr15_102144820_102144849	44.3909	316.823	237.575	166.185	201.898	9.32726	0	0	0	0	0	0	0	0	0	0	0	0.481508	0.588496	0	261.454	0	219.687	0	0	0.257055	52.1114	0	0	0	0	0	0	0	0	0	0	0	0	0	0	0	226.019	37.7742	0	95.8043
car4	chr11_84963446_84963475	44.3909	65.7171	82.1465	9.58757	26.5397	0	0	0	0	0	0	0	0	0	0	0	0	0	0	0	63.9728	0	0	0	0	0	0	0	0	0	0	0	0	0	0	0	0	0	0	0	0	0	0	37.7742	0	0
pamr1	chr2_102640724_102640753	44.3909	202.01	172.567	163.673	136.434	0	0	0	137.408	0	0	0	0	0	0	0	0	0.963017	0	0	135.826	117.228	0	0	36.1135	0	104.223	13.3419	48.0922	0	0	0	0	0	0	0	0	0	0	0	0	0	75.3397	0	49.5625	47.9021
adamts5	chr16_85899865_85899894	44.3909	177.973	114.848	134.683	227.848	9.32726	0	0	0	0	0	0	0	0	0	0	0	0	0	1011.25	116.125	0	0	0	0	0	52.1114	0.256576	0	0	0	0	0	0	0	0	0	0	0	0	0	0	75.3397	0	49.5625	47.9021
rhox13	chrX_38121536_38121565	44.3909	186.667	126.076	134.683	65.6612	0	0	0	68.704	0	0	0	0	0	0	0	0	0	0	0	235.262	0	0	0	0	0.257055	52.1114	0	0	0	0	0	0	0	0	0	0	0	0	0	0	0	0	0	0	0
ush2a	chr1_188759825_188759854	44.3909	118.904	73.2818	99.0715	127.391	0	0	0	0	0	0	0	0	0	0	0	0	0	0	0	95.2639	0	0	0	43.2867	0	52.1114	0	0	0	0	0	0	0	0	0	0	0	0	0	0	0	0	0	0	0
itih5	chr2_10238824_10238853	44.3909	165.955	192.857	68.2544	85.3202	9.32726	0	0	68.704	0	0	0	0	0	0	0	0	0	0	0	147.647	0	0	29.8941	197.635	0	52.1114	0.256576	0	0	0	0	0	0	0	0	0	0	0	0	0	0	75.3397	37.7742	99.1249	23.9511
mrpl34	chr8_71465386_71465415	44.3909	59.5801	176.704	170.065	223.72	0	0	0	0	0	0	0	0	0	0	0	0	0	0	0	212.547	0	0	59.7881	0	0	0	0	0	0	0	0	0	0	0	0	0	0	0	0	0	0	0	0	99.1249	23.9511
pdk4	chr6_5491991_5492020	44.3909	180.274	151.685	217.547	69.9862	0	0	0	137.408	0	0	0	0	0	0	0	0	0	0	0	171.985	117.228	0	29.8941	0	0	52.1114	0	0	0	0	0	0	0	0	0	0	0	0	0	0	0	0	37.7742	99.1249	71.8532
tgfbr3	chr5_107118439_107118468	44.3909	265.681	368.773	129.432	158.059	223.854	101.981	0	274.816	0	0	0	0	0	0	0	0	1377.11	2.35398	0	176.157	1875.64	1867.34	29.8941	0	0	1511.23	0	2067.97	0	0	0	0	0	0	0	0	0	0	0	0	0	75.3397	37.7742	0	71.8532
sdhb	chr4_140966593_140966622	44.3909	76.7125	165.672	1.36965	0	0	0	0	137.408	0	0	0	0	0	0	0	0	0	0	0	225.991	117.228	0	0	0.494705	0	0	0	0	0	0	0	0	0	0	0	0	0	0	0	0	0	75.3397	0	0	0
acacb	chr5_114192104_114192133	44.3909	211.982	247.819	281.692	377.847	0	0	0	68.704	0	0	0	0	0	0	0	0	0.481508	0	0	140.694	0	0	59.7881	0	0.257055	0	0	0	0	0	0	0	0	0	0	0	0	0	0	0	0	0	75.5484	49.5625	71.8532
nlgn1	chr3_25436435_25436464	44.3909	120.439	163.111	24.882	30.4715	0	0	0	0	0	0	0	0	0	0	0	0	0.481508	0	0	123.542	117.228	109.843	0	0	0	0	0	0	0	0	0	0	0	0	0	0	0	0	0	0	0	75.3397	0	0	0
rpl37a	chr1_72711709_72711738	44.3909	13.0411	339.224	0.684826	5.70112	0	0	0	0	0	0	0	0	0	0	0	0	0.481508	0	0	35.4632	0	0	0	0	0	0	0	0	0	0	0	0	0	0	0	0	0	0	0	0	0	0	0	0	23.9511
id4	chr13_48261706_48261735	44.3909	431.124	225.755	336.478	206.42	0	50.9907	0	206.112	2912.93	31.6312	0	4.10373	6.25128	12.9893	92.1789	90657	0.481508	0	0	264.236	117.228	0	0	0	0.257055	52.1114	0	0	0	0	0	0	0	0	0	0	0	0	0	0	0	226.019	37.7742	198.25	0
itih5	chr2_10206760_10206789	44.3909	138.594	71.5089	172.12	210.941	0	0	0	0	0	0	0	0	0	0	0	0	0	0	0	132.118	0	219.687	0	16.3253	0	0	13.5985	0	0	0	0	0	0	0	0	0	0	0	0	0	0	150.679	37.7742	0	47.9021
slc2a4	chr11_69946422_69946451	44.3909	181.809	173.946	294.475	212.514	0	50.9907	0	68.704	0	0	0	0	0	0	0	0	0.481508	0.588496	0	188.673	0	0	0	0.247353	0	0	0	0	0	0	0	0	0	0	0	0	0	0	0	0	0	150.679	37.7742	0	47.9021
tet2	chr3_133487482_133487511	44.3909	148.567	124.303	100.213	46.7885	0	0	0	0	0	0	0	0	0	0	0	0	0	0	0	116.356	0	0	29.8941	0	0.257055	0	0	0	0	0	0	0	0	0	0	0	0	0	0	0	0	75.3397	0	49.5625	47.9021
ncor1	chr11_62376733_62376762	44.3909	246.247	252.546	351.316	338.332	0	0	0	0	0	0	0	0	0	0	0	0	0	0	0	214.633	117.228	0	0	0	0	0	11.8025	0	0	0	0	0	0	0	0	0	0	0	0	0	0	75.3397	0	148.687	23.9511
map2k4	chr11_65788144_65788173	44.3909	220.676	214.724	106.148	15.1375	0	0	0	68.704	0	0	0	0	0	0	0	0	0	0	0	117.979	0	0	0	0	0	52.1114	0	0	0	0	0	0	0	0	0	0	0	0	0	0	0	75.3397	0	0	0
mrpl57	chr14_57826615_57826644	44.3909	69.0413	192.266	107.746	0	111.927	356.935	0	893.152	0	0	0	0	0	0	0	0	25359.1	7.06195	0	272.116	117.228	0	0	0	0	0	0.256576	0	0	0	0	0	0	0	0	0	0	0	0	0	0	0	0	346.937	0
c6	chr15_4735174_4735203	44.3909	121.717	134.547	118.247	188.923	0	0	0	0	0	0	0	0	0	0	0	0	0	0	0	179.402	0	0	0	0	0.257055	104.223	0	0	0	0	0	0	0	0	0	0	0	0	0	0	0	75.3397	0	99.1249	0
mlxipl	chr5_135132497_135132526	44.3909	117.114	167.445	149.977	103.013	9.32726	50.9907	0	0	0	0	0	0	0	0	0	0	0	0	0	142.78	0	109.843	29.8941	0	0	0	0.256576	0	0	0	0	0	0	0	0	0	0	0	0	0	0	0	0	99.1249	47.9021
mto1	chr9_78460871_78460900	44.3909	196.64	205.071	33.0999	64.8748	0	0	0	0	0	0	0	0	0	0	0	0	0	0	0	222.978	117.228	0	0	0.494705	0.257055	0	0	0	0	0	0	0	0	0	0	0	0	0	0	0	0	75.3397	0	0	0
trp53	chr11_69588480_69588509	44.3909	5.36988	6.30381	0	0	9.32726	305.944	0	0	2.78572	0	13.981	41.0373	6.25128	12.9893	0	0	0.963017	0	0	28.5096	0	439.373	119.576	0	0.514109	6566.04	0	48.0922	75.387	10.0805	218.978	111.552	0	108.663	5.18838	0	6.98655	876.02	5.45933	28.2019	0.506881	226.019	75.5484	198.25	23.9511
pgm5	chr19_24834843_24834872	44.3909	156.749	172.37	183.305	184.991	18.6545	0	0	0	0	0	0	0	0	0	0	0	0	0	0	183.342	0	0	29.8941	0.247353	0	0	0	0	0	0	0	0	0	0	0	0	0	0	0	0	0	75.3397	75.5484	49.5625	71.8532
ptprc	chr1_138120030_138120059	44.3909	340.348	341.588	160.934	89.0554	9.32726	50.9907	0	0	0	0	0	0	0	0	0	0	0	0.588496	0	220.428	0	0	89.6822	0	0.257055	52.1114	0	0	0	0	0	0	0	0	0	0	0	0	0	0	0	0	0	99.1249	23.9511
rhox13	chrX_38121716_38121745	44.3909	219.142	203.298	156.369	119.527	9.32726	0	0	137.408	0	0	0	0	0	0	0	0	0	0	0	405.625	234.456	0	29.8941	77.9161	0	0	0	0	0	0	0	0	0	0	0	0	0	0	0	0	0	0	37.7742	0	71.8532
pdk4	chr6_5491842_5491871	88.7818	243.946	233.832	216.177	119.92	0	50.9907	0	68.704	0	0	0	0	0	0	0	0	0	0	0	172.448	0	0	0	0	0	52.1114	0	0	0	0	0	0	0	0	0	0	0	0	0	0	0	75.3397	37.7742	0	47.9021
dsg1a	chr18_20340292_20340321	44.3909	114.557	175.916	79.8964	251.832	0	0	0	0	0	0	0	0	0	0	0	0	0	0	0	90.3964	0	0	0	0	0	0	0	0	0	0	0	0	0	0	0	0	0	0	0	0	0	75.3397	75.5484	49.5625	23.9511
stac2	chr11_98041166_98041195	44.3909	229.37	118.59	109.116	154.52	0	0	0	0	0	0	0	0	0	0	0	0	0	0	0	116.588	234.456	109.843	29.8941	0.247353	0	0	0	0	0	0	0	0	0	0	0	0	0	0	0	0	0	150.679	37.7742	0	23.9511
d7ertd443e	chr7_134349107_134349136	44.3909	244.457	171.188	191.523	523.127	0	0	0	68.704	0	0	0	0	0	0	0	0	0	0.588496	0	257.514	6681.98	0	0	0	0.514109	104.223	0.513151	0	0	0	0	0	0	0	0	0	0	0	0	0	0	150.679	75.5484	49.5625	71.8532
synm	chr7_67759432_67759461	44.3909	314.777	375.274	324.836	392.984	9.32726	50.9907	0	137.408	0	0	0	0	0	0	0	0	0	0	0	268.639	351.683	219.687	59.7881	774.709	0.771164	208.446	110.071	0	0	2.2401	72.9928	0	0	0	0	0	0	0	0	0	0	226.019	37.7742	99.1249	71.8532
brca2	chr5_150540807_150540836	44.3909	128.366	200.146	31.9586	233.549	0	0	0	137.408	0	0	0	0	0	0	0	0	0	0	0	136.985	0	109.843	0	14.0991	0.257055	0	0	0	0	0	0	0	0	0	0	0	0	0	0	0	0	75.3397	37.7742	49.5625	0
pgm5	chr19_24820210_24820239	44.3909	108.165	113.666	108.659	22.2147	0	0	0	0	0	0	0	0	0	0	0	0	0	0	0	190.296	0	0	0	0.247353	0	104.223	0	0	0	0	0	0	0	0	0	0	0	0	0	0	0	0	0	0	47.9021
crebbp	chr16_4124732_4124761	44.3909	118.137	127.455	49.5358	22.0181	9.32726	0	0	0	0	0	0	0	0	0	0	0	0	0	0	122.151	117.228	0	0	0	0	52.1114	0.256576	0	0	0	0	0	0	0	0	0	0	0	0	0	0	0	0	49.5625	0
mrpl17	chr7_105809963_105809992	44.3909	280.512	265.351	232.156	352.29	0	5812.94	0	68.704	0	0	0	0	0	0	0	0	0	0	0	407.479	117.228	109.843	0	0	0.257055	104.223	0	0	0	0	0	0	0	0	0	0	0	0	0	0	0	0	113.323	99.1249	47.9021
penk	chr4_4134396_4134425	44.3909	220.421	225.952	142.672	192.659	0	0	0	206.112	0	0	0	0	0	0	0	0	0	0.588496	0	256.818	117.228	0	21404.2	0.247353	0.257055	52.1114	0.256576	0	0	0	0	0	0	0	0	0	0	0	0	0	0	0	0	99.1249	23.9511
ptgfr	chr3_151801801_151801830	44.3909	256.22	170.4	255.668	222.147	0	0	0	0	0	0	0	0	0	0	0	0	0	0	0	190.759	0	0	29.8941	0	0.257055	52.1114	0	0	0	0	0	0	0	0	0	0	0	0	0	0	0	75.3397	0	49.5625	23.9511
fat1	chr8_45036759_45036788	44.3909	163.398	235.014	92.4516	46.3953	0	0	0	0	0	0	0	0	0	0	0	0	0	0.588496	0	112.184	0	0	0	0.247353	0	0	0	0	0	0	0	0	0	0	0	0	0	0	0	0	0	75.3397	37.7742	0	0
cma1	chr14_55942339_55942368	44.3909	297.645	282.687	512.25	243.969	0	0	0	137.408	0	0	0	0	0	0	0	0	0	0	0	356.718	0	0	0	0	0	52.1114	0.256576	0	0	0	0	0	0	0	0	0	0	0	0	0	0	150.679	113.323	0	0
adipoq	chr16_23157123_23157152	44.3909	324.238	193.054	181.707	316.314	0	50.9907	0	137.408	0	0	0	0	0	0	0	0	0	1.17699	0	80.1978	234.456	0	0	0	0	0	0	0	0	0	0	0	0	0	0	0	0	0	0	0	0	0	0	99.1249	71.8532
mamdc2	chr19_23350827_23350856	44.3909	99.982	110.711	64.602	112.843	0	0	0	0	0	0	0	0	0	0	0	0	0.481508	0	0	137.217	117.228	0	29.8941	0	0	52.1114	0.256576	0	0	0	0	0	0	0	0	0	0	0	0	0	0	75.3397	0	0	0
rgn	chrX_20550406_20550435	44.3909	163.142	160.156	87.4295	358.188	0	0	0	0	0	0	0	0	0	0	0	0	0	0	0	185.197	0	0	29.8941	40.8132	0	0	0	0	0	0	0	0	0	0	0	0	0	0	0	0	0	150.679	37.7742	49.5625	23.9511
slco1a6	chr6_142101606_142101635	44.3909	218.886	284.656	150.205	398.882	0	0	0	68.704	0	0	0	0	0	0	0	0	0	0	0	238.971	117.228	0	0	0	0	0	0	0	0	0	0	0	0	0	0	0	0	0	0	0	0	150.679	37.7742	99.1249	23.9511
scap	chr9_110378612_110378641	44.3909	155.726	227.725	54.5578	29.6851	0	0	0	0	0	0	0	0	0	0	0	0	0	0	0	87.3831	0	0	0	0	0	0	0.256576	0	0	0	0	0	0	0	0	0	0	0	0	0	0	0	37.7742	49.5625	47.9021
tenm2	chr11_36039881_36039910	44.3909	232.695	181.826	11.8703	299.014	0	0	0	0	0	0	0	0	0	0	0	0	0.481508	0	0	354.632	0	0	29.8941	0.494705	0.257055	52.1114	0	0	0	0	0	0	0	0	0	0	0	0	0	0	0	0	0	99.1249	0
adcy5	chr16_35156333_35156362	44.3909	176.183	129.425	20.5448	90.4315	0	0	0	0	0	0	0	0	0	0	0	0	0	0	0	126.555	0	0	0	41.0605	0	0	0	0	0	0	0	0	0	0	0	0	0	0	0	0	0	0	0	0	0
dnase1l3	chr14_7974090_7974119	44.3909	190.759	225.361	75.7874	206.813	0	0	0	0	0	0	0	0	0	0	0	0	0	0.588496	0	269.103	117.228	109.843	89.6822	0.247353	0	208.446	0	0	0	0	0	0	0	0	0	0	0	0	0	0	0	0	0	49.5625	71.8532
smarca4	chr9_21672055_21672084	44.3909	115.836	246.834	18.7186	85.3202	0	0	0	0	0	0	0	0	0	0	0	0	0	0	0	77.6482	0	0	29.8941	0	0	0	0.256576	0	0	0	0	0	0	0	0	0	0	0	0	0	0	0	0	0	0
reln	chr5_21987028_21987057	44.3909	240.622	232.256	253.842	506.613	0	0	0	0	0	0	0	0	0	0	0	0	0	0	0	121.687	0	0	29.8941	0	0.257055	0	0	0	0	0	0	0	0	0	0	0	0	0	0	0	0	75.3397	75.5484	0	71.8532
slco1a4	chr6_141834610_141834639	44.3909	244.457	294.309	487.825	545.342	0	50.9907	0	137.408	0	0	0	0	0	0	0	0	0	0	0	274.666	0	219.687	0	0	0	0	0.256576	0	0	0	0	0	0	0	0	0	0	0	0	0	0	150.679	75.5484	148.687	47.9021
usp44	chr10_93845807_93845836	44.3909	239.599	214.527	245.396	145.673	0	0	0	68.704	0	0	0	0	0	0	0	0	0.481508	0	0	295.527	0	0	0	0	0	52.1114	0.513151	0	0	0	0	0	0	0	0	0	0	0	0	0	0	150.679	0	148.687	23.9511
[truncated: 2,311 more rows]

## Sheet: Rank
Gene	M_56	M_59	M_61	M_62	M_64	M_65	M_66	M_68	M_69	M_71	M_74	M_75	M_78	M_79	M_80	M_81	M_82	M_83	M_84	M_85	M_87	M_88	M_89	M_91	M_92	M_93	M_94	M_95	M_97	M_98	M_99	M_100
[truncated: 29 more rows]

[truncated: 1 more sheets: Score]
