# Supplementary material
Source: Research Square preprint supplement (doi:10.21203/rs.3.rs-8902045/v1)
Supplement: Supplementary file 6 [file c030079043f7f9811360dceb.xlsx]

## Sheet: Legend
Sheet	Legend
AF _RNAseq	The DESeq2 results of differential expressed genes in AFDKO MCF7 cells compared with parental control
PT _RNAseq	The DESeq2 results of differential expressed genes in PTDKO MCF7 cells compared with parental control.
AF_Proteome	The DESeq2 results of differential proteins in AFDKO MCF7 cells compared with parental control.
PT_Proteome	The DESeq2 results of differential proteins in PTDKO MCF7 cells compared with parental control.
SMARCA1_RNAseq	The DESeq2 results of differential expressed genes in SMARCA1 KO MCF7 cells compared with parental control
SMARCA1_ATACseq	The DESeq2 results of differential ATACseq peaks in SMARCA1 KO MCF7 cells compared with parental control
AAVS1_CUT&Tag	SMAD2/3 binding peaks in AAVS1 KO MCF7 cells from CUT&Tag results
SMARCA1_CUT&Tag	SMAD2/3 binding peaks in SMARCA1 KO MCF7 cells from CUT&Tag results
AF_ATACseq	The DESeq2 results of differential ATACseq peaks in AFDKO MCF7 cells compared with parental control
PT_ATACseq	The DESeq2 results of differential ATACseq peaks in PTDKO MCF7 cells compared with parental control

## Sheet:  AF_RNAseq
Gene_symbol	log2 fold-change	p-value	Ajusted p-value	Basemean	AFDKO_Rep1	AFDKO_Rep2	AFDKO_Rep3	AAVS1_Rep1	AAVS1_Rep2	AAVS1_Rep3
CXCL12	-2.38128	1.01108e-198	1.66535e-194	657	631	578	762	3189	3627	3449
CRABP2	-1.19824	2.05081e-171	1.68895e-167	5039	5323	4249	5545	10662	11984	12007
MYO5C	1.0137	1.67369e-168	9.18912e-165	22985.7	23289	20332	25336	10533	11645	12025
RDX	1.19024	1.07779e-142	4.43807e-139	12751.3	12728	11325	14201	5074	5570	6163
CA12	-1.08332	5.69878e-127	1.87729e-123	4696.67	4867	4007	5216	9454	9986	10371
DMXL2	1.23001	3.89695e-107	8.02333e-104	7648.33	7668	6614	8663	2804	3429	3571
PCDH10	-2.10937	1.0776e-103	1.61355e-100	414	447	335	460	1732	1738	1869
EMC10	-1.47225	3.03435e-99	4.1649e-96	2403.33	2786	1876	2548	6266	6510	7141
ATOSA	1.03296	5.29984e-97	6.23526e-94	8104.33	8099	7304	8910	3625	4020	4273
OAS3	1.05805	1.2993e-94	1.42672e-91	8172	8320	7064	9132	3518	4238	4026
MUC5B	1.27746	2.84013e-90	2.92374e-87	3928.33	4279	3315	4191	1501	1617	1742
TNNT1	-1.18799	1.26328e-83	1.15597e-80	1811	1829	1643	1961	3762	4161	4499
SLC27A2	1.30982	1.5661e-77	1.35764e-74	4315.33	4890	3578	4478	1590	1715	1916
IFI6	1.42758	4.32721e-69	2.85094e-66	5816.33	6990	4575	5884	1960	2316	2190
CXCL8	2.4446	1.47721e-68	9.35815e-66	866.333	915	743	941	165	157	154
GOLM1	-1.80268	7.28298e-68	4.28421e-65	420	395	368	497	1350	1497	1549
PARP14	1.45151	1.64531e-64	8.46871e-62	2031.67	2104	1846	2145	728	755	749
SOX2	1.07314	6.03323e-61	2.83924e-58	4011.67	4310	3451	4274	1681	2087	1961
NELL2	-1.00501	2.77724e-60	1.20379e-57	1797	1899	1544	1948	3354	3762	3701
IER3	-1.2534	6.46881e-60	2.732e-57	957.667	1003	803	1067	2091	2263	2492
UBE2QL1	-2.18862	2.72278e-58	1.09383e-55	312.667	362	197	379	1310	1387	1526
DPYSL5	-2.95133	3.96648e-58	1.55552e-55	82.6667	69	69	110	567	706	641
L1CAM	-1.26385	5.29063e-58	1.9805e-55	1061.33	1189	894	1101	2449	2538	2648
PMP22	-1.83313	1.49018e-57	5.45439e-55	377.333	447	298	387	1178	1445	1407
MDGA1	4.9728	6.3255e-57	2.26494e-54	379	404	315	418	16	10	10
PEG10	-1.27863	1.03402e-56	3.6237e-54	976	976	928	1024	2157	2484	2504
NPY1R	-1.20395	9.13057e-55	2.89211e-52	1292.67	1225	1110	1543	2741	3047	3136
LGALS1	-1.51476	4.38436e-49	1.16475e-46	509.667	580	397	552	1318	1533	1504
KCNJ3	-1.75973	2.47173e-48	6.4622e-46	305.667	332	233	352	935	1039	1119
CCN5	-3.08942	3.65172e-47	9.39804e-45	52.6667	49	41	68	453	452	429
SHISA2	-1.05779	8.82814e-46	2.20316e-43	1498	1715	1231	1548	2884	3213	3246
TNFAIP3	1.09515	6.11622e-45	1.46e-42	2153.33	2300	1789	2371	960	1011	1045
CLDN9	1.19832	7.30202e-44	1.69397e-41	2796.67	3231	2358	2801	1090	1187	1387
EPAS1	-1.0751	1.09928e-39	2.23534e-37	1067	1160	850	1191	2157	2279	2274
IGF2	1.45839	4.25875e-39	8.45132e-37	1165	1207	1052	1236	355	431	494
SLC1A4	1.04025	1.9309e-38	3.74163e-36	2087	2088	1786	2387	936	1076	1029
EPHA4	-1.01097	5.65964e-38	1.04741e-35	1117.67	1114	946	1293	2086	2373	2286
ITPRIPL2	-1.1747	6.70432e-37	1.21348e-34	762	741	724	821	1620	1825	1736
SLITRK6	-2.52963	1.95877e-35	3.29213e-33	78.3333	73	70	92	376	547	438
OAS1	1.37977	4.77078e-35	7.85795e-33	1199.33	1183	1174	1241	433	472	488
SLC7A11	1.46781	5.38967e-33	8.21974e-31	1134.67	1052	1051	1301	359	390	489
SP110	1.0271	2.09535e-31	3.00109e-29	1532.33	1586	1310	1701	686	801	768
LINC00869	-1.13463	3.15678e-31	4.48235e-29	679.333	766	562	710	1454	1442	1567
PLXNA4	-1.79907	1.02447e-30	1.41799e-28	259.333	332	233	213	872	907	939
LINC00623	-1.1507	8.30824e-30	1.0691e-27	532	547	480	569	1067	1269	1218
PARP9	1.09873	4.60173e-28	5.41394e-26	1640.33	1623	1372	1926	638	769	894
SYT17	-1.35707	5.56119e-28	6.49634e-26	332.333	347	302	348	734	868	967
B4GALNT1	-1.01652	8.54159e-28	9.90764e-26	899.333	1048	706	944	1695	1850	1893
IFIT1	1.71923	4.04467e-27	4.563e-25	643	634	553	742	148	199	242
AKAP5	1.22732	1.22515e-25	1.25338e-23	1135.33	1075	1045	1286	402	492	571
GUCY1A1	-2.01627	2.18854e-25	2.2115e-23	126.667	122	87	171	419	506	603
POTEKP	1.28571	4.07126e-25	4.08888e-23	855.333	859	699	1008	305	355	391
SEMA3D	-1.59839	9.66865e-25	9.42322e-23	175.667	195	150	182	503	519	574
MUC5AC	2.43975	1.07558e-23	9.78782e-22	316	336	226	386	43	57	74
SAMD9	2.02906	2.01958e-23	1.77885e-21	433.667	500	379	422	75	111	136
LINC02732	1.78782	4.2286e-23	3.60877e-21	499	515	458	524	135	118	183
IFIH1	1.11238	1.09496e-22	9.01753e-21	1138.67	1204	993	1219	420	601	567
LIN7A	-1.12186	3.06296e-22	2.47304e-20	482	486	460	500	1002	979	1183
WIPF1	-1.44485	2.04869e-21	1.53382e-19	238	266	227	221	606	610	742
PLEKHS1	-2.72797	1.0366e-20	7.23466e-19	31.3333	26	29	39	186	192	247
NKAIN1	-1.46835	1.48627e-20	1.02859e-18	218.667	194	215	247	565	564	698
CD109	1.02351	1.54579e-20	1.0653e-18	1367.33	1279	1297	1526	695	663	662
PGM5	-1.36686	4.07586e-19	2.59203e-17	241	271	209	243	649	627	582
NUPR1	-2.32146	9.05573e-19	5.71483e-17	59	47	57	73	324	324	232
KCNK2	-1.79246	4.92123e-17	2.598e-15	89.3333	92	66	110	284	293	346
FBN2	-1.91803	1.92988e-16	9.48867e-15	67.6667	69	58	76	238	286	242
BMERB1	-1.23353	2.00706e-16	9.8096e-15	224	232	194	246	524	507	546
CACNA1C	1.43254	2.53275e-16	1.21979e-14	519.667	573	507	479	171	229	183
GABRP	-1.37681	2.78558e-16	1.33376e-14	172.333	179	141	197	447	458	430
OAS2	2.0505	1.02466e-15	4.70116e-14	248.333	212	227	306	47	59	75
CDH13-AS2	-1.08434	1.49432e-15	6.7618e-14	315	349	255	341	599	638	766
LINC01087	1.14936	2.77753e-15	1.20391e-13	543	569	486	574	242	236	257
GALNT14	-1.47261	6.44311e-15	2.66644e-13	181.333	177	210	157	493	532	509
CXADR	-2.14233	1.56836e-14	6.07823e-13	56.3333	39	57	73	197	234	324
ZNF347	1.81434	1.63744e-14	6.33105e-13	260.333	247	223	311	79	62	80
PCDHA1	2.18497	1.76672e-14	6.81492e-13	233.333	241	181	278	52	32	69
MEIS1	1.06143	1.79041e-14	6.89016e-13	609	620	526	681	278	317	279
CAPN8	1.07222	2.24479e-14	8.55877e-13	726.667	762	669	749	355	296	388
GUCY1B1	-1.23629	5.17124e-14	1.897e-12	193.667	196	171	214	372	495	509
RAB6B	-1.05566	7.28481e-14	2.64291e-12	335	383	286	336	623	802	666
LINC01145	-1.10837	1.00538e-13	3.61564e-12	450	554	326	470	789	1175	935
NFIA	-1.56843	2.1129e-13	7.42037e-12	100	89	101	110	264	289	345
ZNF486	-2.60655	2.40461e-13	8.35575e-12	25.6667	18	36	23	130	183	169
PRRG2	-1.35863	2.76508e-13	9.54792e-12	137.667	157	107	149	317	375	364
CDH13	2.4795	4.96101e-13	1.66421e-11	176	198	162	168	17	50	29
ONECUT1	1.02084	5.02856e-13	1.68003e-11	638	621	588	705	277	295	377
USP50	1.31351	6.64777e-13	2.1987e-11	442.667	470	433	425	135	203	204
GASK1B	1.0592	1.05469e-12	3.37972e-11	713	882	596	661	299	372	358
DDX60	1.83848	1.52351e-12	4.79804e-11	236.667	230	168	312	51	76	70
TFPI	-1.26581	1.56679e-12	4.91554e-11	164	156	159	177	371	439	378
SLC1A2	-1.26981	1.63002e-12	5.10421e-11	188.333	226	127	212	411	435	505
SYNPO2	1.03393	1.75887e-12	5.49722e-11	529.667	541	480	568	228	290	261
ANKRD35	1.17627	3.29758e-12	9.9114e-11	516	581	369	598	235	222	219
MIA-RAB4B	-10.5466	4.19641e-12	1.24989e-10	0	0	0	0	452	242	108
PLCXD3	-2.16725	4.53719e-12	1.34169e-10	42	36	57	33	188	203	188
LRFN5	-1.53912	6.20895e-12	1.78167e-10	120.667	149	111	102	340	285	434
TGFB2	-1.13368	6.87358e-12	1.96895e-10	191.333	189	174	211	405	444	411
SLC25A18	1.16053	7.59311e-12	2.16377e-10	469.333	484	431	493	189	254	189
IFITM10	-1.30707	2.4614e-11	6.61366e-10	330.333	408	207	376	813	993	597
GNRHR2	-1.29442	2.58274e-11	6.88354e-10	245.667	283	228	226	536	803	477
SDK2	-1.30376	3.69853e-11	9.68496e-10	147	118	143	180	323	373	399
IER3-AS1	-1.31184	4.18116e-11	1.08968e-09	120.333	113	112	136	280	291	328
COL3A1	-2.25717	4.85801e-11	1.25221e-09	27.6667	32	27	24	133	113	153
CMPK2	1.13255	5.05427e-11	1.30076e-09	374.333	385	311	427	149	177	186
CHST8	-1.5543	5.46212e-11	1.40135e-09	80.3333	84	82	75	197	255	265
SPOCK1	1.24581	7.31289e-11	1.83334e-09	403	404	342	463	158	210	140
OLFM2	-1.01163	8.93658e-11	2.22348e-09	316	358	208	382	588	640	660
EVA1B	-1.28111	1.08481e-10	2.68689e-09	287.667	402	262	199	679	744	687
GJB7	1.47286	1.37178e-10	3.3573e-09	297	247	283	361	86	100	138
TRIM29	1.12799	1.42019e-10	3.45523e-09	400	369	342	489	180	179	188
CACNA2D1	-8.24027	1.733e-10	4.15491e-09	0	0	0	0	59	50	58
SH3TC1	1.58985	2.01997e-10	4.801e-09	276.667	347	186	297	63	101	111
SMARCA1	-1.67941	2.0525e-10	4.85032e-09	63.6667	57	67	67	186	243	188
B4GALNT3	-1.1591	2.5214e-10	5.90753e-09	156.667	146	143	181	315	385	352
VWDE	-2.30685	7.90921e-10	1.72546e-08	22.3333	16	24	27	103	113	118
LINC01515	-1.76304	1.10638e-09	2.36052e-08	48.3333	42	46	57	147	150	198
GHR	-1.03699	1.72702e-09	3.57359e-08	230.333	216	224	251	517	454	446
DDX60L	1.55036	1.94784e-09	3.97065e-08	207.333	179	181	262	56	75	82
SCNN1B	-1.65272	1.99519e-09	4.04713e-08	62.3333	50	61	76	195	224	169
GRIK3	-1.29586	2.30677e-09	4.59985e-08	180	260	116	164	408	489	415
HLF	1.3223	2.8361e-09	5.58106e-08	302.333	253	329	325	101	126	142
RNF145	-1.34227	3.69807e-09	7.12408e-08	126.667	173	78	129	286	314	354
RAB11FIP1P1	1.74871	4.08069e-09	7.79734e-08	164.667	167	138	189	46	36	65
PARP10	1.17053	4.41621e-09	8.38012e-08	407	503	288	430	155	158	227
UPK1A	-1.31244	5.80846e-09	1.08103e-07	119.667	131	78	150	259	349	273
EFNA5	-1.38493	5.93747e-09	1.10135e-07	112.667	80	119	139	276	267	348
LINC01138	-1.04712	8.91182e-09	1.58175e-07	170.667	155	159	198	321	387	353
ATP8B4	1.64081	9.70211e-09	1.70185e-07	195.333	256	150	180	65	48	74
CDH11	-3.60062	1.0688e-08	1.86289e-07	5.66667	10	0	7	62	84	54
RUNDC3B	1.13651	1.43959e-08	2.44953e-07	369	360	381	366	168	137	204
CA11	-1.10972	1.83089e-08	3.04919e-07	172.333	177	140	200	268	449	403
NPIPB12	1.22834	2.24657e-08	3.68558e-07	613.667	667	464	710	354	173	241
RAB6D	1.11611	2.39526e-08	3.90618e-07	278	271	241	322	113	140	132
ASB9	1.11938	2.98862e-08	4.81188e-07	335.333	361	246	399	166	133	158
ASTL	-1.22888	3.97268e-08	6.30385e-07	99.6667	104	86	109	218	264	218
ETV3L	7.49581	4.18388e-08	6.60083e-07	32.6667	35	36	27	0	0	0
KLK11	-2.03766	4.4514e-08	6.98276e-07	24.3333	25	22	26	99	88	113
IL20	-2.58821	5.42655e-08	8.34553e-07	18.6667	7	33	16	95	101	158
HFE	-1.18038	7.36361e-08	1.1036e-06	122.333	116	130	121	219	303	324
DACH1	-1.42175	8.44847e-08	1.24245e-06	73	56	65	98	188	200	197
TSPAN5	-1.1536	1.10734e-07	1.58325e-06	128.333	130	104	151	272	339	240
PKHD1L1	2.06427	1.25963e-07	1.78549e-06	135.333	130	138	138	45	14	38
SLIT2	-1.40456	1.36131e-07	1.91479e-06	84.3333	78	51	124	198	229	232
MROH7-TTC4	5.12429	1.41523e-07	1.98216e-06	44.6667	56	52	26	0	0	4
KCNN4	-1.48541	1.83831e-07	2.54231e-06	61.3333	70	52	62	200	145	166
IFI27	1.30313	1.98061e-07	2.71855e-06	242	263	174	289	109	72	109
BFSP2	-1.21674	2.05627e-07	2.80604e-06	86.6667	87	81	92	193	204	209
PLXNA2	1.10549	2.13833e-07	2.90598e-06	254	276	222	264	120	103	131
ANO7	1.37712	2.40649e-07	3.22254e-06	189.333	176	164	228	84	60	73
DIRAS2	1.95029	2.97411e-07	3.91579e-06	147.333	119	121	202	18	61	36
CERNA1	1.23001	3.19226e-07	4.16968e-06	228.333	245	172	268	72	97	123
MMP16	-1.05287	3.55058e-07	4.59761e-06	150.333	161	149	141	267	286	395
AK4P1	-1.40979	7.17846e-07	8.7195e-06	57	58	47	66	140	133	181
ANKRD33B	1.41164	7.34525e-07	8.9024e-06	150.333	148	150	153	51	66	54
GPR89P	-3.28262	9.38488e-07	1.10571e-05	4.66667	5	4	5	31	39	68
ADGRL2	-1.06783	1.11755e-06	1.29719e-05	116.333	123	85	141	242	241	241
RAET1E-AS1	1.53811	1.38986e-06	1.58206e-05	215.167	285.5	170.5	189.5	107	57.5	53
BOC	-1.31161	1.45103e-06	1.64148e-05	80.6667	57	75	110	165	224	214
ZDBF2	-1.35745	1.62487e-06	1.81691e-05	58.6667	55	53	68	132	139	182
GARIN5A	-1.54223	1.62629e-06	1.81728e-05	47.3333	60	41	41	127	171	116
CEBPA-DT	-1.01234	1.69976e-06	1.89423e-05	121.667	127	113	125	209	278	254
GGT6	-1.63093	1.9525e-06	2.14254e-05	36	44	33	31	112	119	104
NRP2	1.52178	1.96054e-06	2.14851e-05	167	157	136	208	78	54	39
SPRY1	-1.23617	1.97021e-06	2.15623e-05	80	70	75	95	166	228	173
DNAH3	1.37026	2.07416e-06	2.24737e-05	153.667	146	133	182	44	75	60
DLX2	-1.07486	2.13363e-06	2.30446e-05	115	131	116	98	235	254	244
NPAS3	-1.31397	2.29753e-06	2.46051e-05	69	87	47	73	141	165	207
LINC01293	-1.13619	2.39799e-06	2.5548e-05	94	93	98	91	170	222	237
KCNJ8	-1.00381	2.65485e-06	2.81029e-05	141.333	145	95	184	272	271	296
INSYN1	-1.30061	3.46586e-06	3.58807e-05	74	94	54	74	128	196	225
BMP5	-2.42554	4.60456e-06	4.63297e-05	10.3333	9	8	14	58	48	59
SERHL	-1.19332	4.68751e-06	4.70494e-05	104	119	57	136	184	257	263
RNF183	1.89364	5.04324e-06	5.01614e-05	83.6667	80	59	112	17	27	23
A1BG	-1.06051	5.26358e-06	5.21012e-05	95.6667	103	77	107	195	189	212
CTSE	2.53993	5.4867e-06	5.40665e-05	52.6667	60	41	57	8	13	6
VCAN	-3.26011	5.58088e-06	5.48792e-05	4.66667	0	7	7	38	51	48
GBP1	1.50271	5.96587e-06	5.83514e-05	111	119	98	116	32	48	38
RSAD2	1.5945	6.64478e-06	6.44939e-05	106	136	77	105	29	36	40
HNRNPK-AS1	2.42264	7.64767e-06	7.31928e-05	54.6667	53	38	73	12	9	9
ZNF804A	-4.3433	1.10094e-05	0.000101703	1.66667	5	0	0	42	23	34
JAKMIP1	-4.88306	1.31881e-05	0.000119959	1	0	0	3	31	30	25
MAST1	-1.00925	1.81656e-05	0.00016026	110.333	132	105	94	197	216	260
SCIN	-1.81653	2.29144e-05	0.000197914	20	23	19	18	70	73	69
PRKD1	-1.19297	2.35023e-05	0.000202462	100.333	125	47	129	223	237	210
TUBB4A	-1.35034	2.56922e-05	0.000219718	47	58	39	44	104	142	114
APOL1	1.86501	2.71074e-05	0.000230148	65.6667	64	55	78	16	19	19
FXYD4	3.2333	3.48453e-05	0.000287832	39	39	24	54	6	6	0
RASL10B	-1.24904	3.55258e-05	0.000292719	54.6667	56	45	63	125	109	155
DACT3-AS1	-2.8359	3.65029e-05	0.000299721	5.66667	10	3	4	50	31	38
LGI1	1.3307	3.81503e-05	0.000310922	121.667	140	94	131	42	39	64
SLC9A4	2.01856	4.11046e-05	0.000331915	63	69	68	52	18	19	10
CD74	1.06817	6.2426e-05	0.000484324	212.333	188	225	224	112	119	74
RAMP3	-1.06315	7.92093e-05	0.000596278	80.6667	91	74	77	126	172	214
PLEKHF1	-1.27652	8.34169e-05	0.000623676	45.6667	50	35	52	87	121	124
LINC02591	-1.05928	8.50231e-05	0.000634246	72.6667	84	64	70	154	147	153
GNG7	-1.39759	8.57051e-05	0.000638466	55	87	45	33	107	156	177
GRAMD4P8	1.89136	8.88299e-05	0.000659359	77.6667	92	90	51	20	32	12
CNTD1	3.47176	8.98898e-05	0.000665427	446.333	663	53	623	30	44	41
ABCB1	1.82455	9.80904e-05	0.000716791	57.6667	61	52	60	15	17	17
AKR7L	1.48914	0.000106235	0.000769138	103.333	135	64	111	22	46	42
EXOC3L4	1.09732	0.000121979	0.000870127	148	184	127	133	67	61	80
ITGA1	1.48132	0.000122772	0.000874647	85.6667	69	87	101	25	37	31
PSAPL1	1.51634	0.000130451	0.00092535	82.3333	110	63	74	28	28	30
PIANP	-1.79228	0.000132286	0.000937963	19	12	18	27	68	54	75
SLC8A1-AS1	2.18045	0.000141697	0.00099824	57	63	81	27	15	13	11
IGFL1	-1.83133	0.00014912	0.0010434	18	16	21	17	55	92	48
LGALS9	1.7905	0.000171197	0.001179	62.6667	59	60	69	15	12	28
UBQLN1-AS1	1.27727	0.000182989	0.00125219	130	172	92	126	42	41	78
DAPP1	1.57102	0.000211634	0.00142628	85	118	57	80	37	25	22
ATXN1-AS1	1.28915	0.000217911	0.00146558	109.333	118	86	124	30	40	65
LEF1	1.13751	0.000232794	0.00155237	114.667	108	109	127	51	48	58
FAT4	-1.1681	0.000254036	0.00167297	54.6667	41	47	76	107	129	132
LINC01665	2.22018	0.000259385	0.00170212	46.3333	38	63	38	6	17	8
PDE6B	-1.46202	0.00027684	0.00179875	33	40	24	35	51	108	116
LINC00494	1.05117	0.000282569	0.00183236	129.667	133	100	156	53	66	68
SERPINE1	-1.68463	0.000302807	0.00194294	20.6667	19	15	28	60	89	48
ROR2	-1.29137	0.000303587	0.00194719	46.6667	32	50	58	84	108	157
GNAQP1	1.25331	0.000356479	0.00224878	120.333	132	99	130	26	71	56
KLRA1P	1.1776	0.000357869	0.00225582	106.667	116	78	126	36	52	53
MN1	1.32165	0.000420436	0.00260632	81.3333	91	64	89	33	30	34
TCAF2P1	1.28933	0.000439769	0.00271493	90.3333	93	79	99	25	37	50
TEX19	-1.03969	0.00044487	0.00273923	62.6667	70	57	61	114	156	118
PRKG1	-1.0726	0.000470053	0.00287069	67	74	71	56	107	135	190
TRPC6	1.48353	0.000473822	0.00289049	85.3333	118	50	88	22	25	44
GRAMD2A	1.03951	0.000478774	0.0029153	166.667	158	113	229	52	97	93
VWFP1	1.5034	0.000483834	0.00294176	76	93	47	88	29	18	32
HSPD1P11	1.57406	0.000531397	0.00319207	79.3333	90	74	74	10	32	40
PCDHGA7	1.31561	0.000584379	0.00346359	137	67	165	179	63	45	59
SATB1	-2.42554	0.000584715	0.00346433	6	7	4	7	19	44	34
CHI3L2	1.493	0.000641374	0.00375411	65.6667	67	56	74	19	32	19
COL14A1	-1.19972	0.000723402	0.00416177	48.3333	36	65	44	111	121	109
ZNF608	-1.11604	0.000733101	0.00421315	46	48	47	43	94	98	110
LINC02568	-1.65076	0.000734569	0.00422012	24.6667	15	43	16	91	74	77
CDRT4	3.76278	0.000737935	0.00423798	31.6667	6	83	6	0	6	2
PCDHGB6	1.64236	0.000867928	0.0048575	112.333	147	159	31	33	41	39
NPY5R	-1.52712	0.000918405	0.00511914	26	41	14	23	54	102	67
POTEI	1.96208	0.000945721	0.00524477	42.6667	27	41	60	10	8	15
TCAF2C	1.30408	0.000969534	0.00536239	72	75	68	73	26	34	28
TCEA3	-1.43748	0.000972463	0.00537213	23.6667	20	25	26	54	59	82
NDUFC2-KCTD14	1.60807	0.00101341	0.0055621	129.333	194	82	112	62	9	53
CALHM6	1.48005	0.00102519	0.00560806	81.6667	133	44	68	23	27	37
CPT1C	-1.46538	0.00104144	0.00568564	26.6667	37	17	26	89	76	51
AKAP7	1.06158	0.00111122	0.00601079	108.667	107	112	107	56	57	44
MYEOV	-1.13479	0.00137276	0.00721008	42.6667	50	33	45	74	85	123
WDFY4	1.40063	0.00149647	0.00775837	74.6667	96	55	73	40	22	21
LGI2	1.50225	0.00150682	0.00780958	57	72	40	59	16	26	18
RIMBP3C	1.12235	0.00156616	0.00807392	87.3333	105	72	85	40	41	39
CTNNA3	-1.26305	0.00164718	0.00844402	31.3333	24	31	39	78	63	85
CASP4	1.16703	0.00165893	0.00849637	93.3333	73	99	108	28	52	47
KRT89P	1.34847	0.00180125	0.00908125	66	85	50	63	19	26	33
PDE4D	-1.01742	0.00180293	0.00908693	63.3333	90	43	57	142	125	112
GPR173	1.72571	0.00181459	0.00913729	54.3333	56	41	66	11	30	8
IL10RA	-2.2826	0.00181996	0.00914918	6.33333	8	3	8	22	21	49
ZFP37	1.34962	0.00183111	0.00918678	62.6667	52	61	75	25	22	27
SCNN1G	-1.83481	0.00191253	0.00952275	11.6667	12	8	15	31	30	64
TWIST1	-2.41796	0.00192457	0.0095769	7	8	13	0	24	54	42
ACVR2B-AS1	-1.01849	0.0020382	0.0100512	57	61	35	75	113	94	134
POC1B-GALNT4	-1.52106	0.00207251	0.0101808	141.333	153	77	194	517	211	445
GALNT13	1.56981	0.00207902	0.0101945	49.3333	56	31	61	17	14	18
COL4A6	1.14458	0.00213028	0.0104087	110.333	129	131	71	49	62	42
CYP19A1	1.86083	0.00213733	0.0104401	44	63	38	31	18	6	12
IFIT2	1.25291	0.00219234	0.0106645	122.667	98	133	137	22	44	94
TRIM6	1.82538	0.00225736	0.0109227	39	49	37	31	13	13	7
AACSP1	1.86621	0.00227258	0.0109867	38.3333	52	20	43	9	10	12
WAKMAR2	1.65538	0.00263137	0.012433	57.3333	76	56	40	13	9	34
LMNTD2	1.19616	0.00270491	0.0127366	81	90	64	89	21	34	52
NPIPB9	1.65707	0.00274847	0.012938	41.6667	41	29	55	14	12	13
NPIPB8	1.55169	0.00279146	0.0131216	55	40	66	59	10	29	19
LINC01876	1.54979	0.0029904	0.0139177	49.3333	51	39	58	8	21	22
UTP14C	1.51988	0.00299895	0.013946	101	35	61	207	30	29	44
POLN	2.25982	0.00301443	0.0140043	39.3333	12	57	49	4	4	18
PDGFC	-1.14519	0.00305046	0.0141333	34.3333	30	40	33	67	80	85
SSTR2	-1.36422	0.00306406	0.014187	23	29	25	15	59	61	60
C4orf54	2.56256	0.00311637	0.0143861	26	22	35	21	0	6	8
PDE4DIPP6	-1.4777	0.00314686	0.0145106	23	23	19	27	27	97	71
GUCY1A2	-1.1632	0.00328398	0.0149794	40	29	29	62	83	70	113
ZNF222	1.02199	0.00338614	0.0153645	119.667	152	81	126	33	79	65
CPNE7	-2.15924	0.00338942	0.0153751	9.33333	17	0	11	46	32	41
FAM181A-AS1	1.7013	0.00350366	0.0158193	36.6667	45	32	33	10	11	13
ABHD14A-ACY1	1.84998	0.00354337	0.0159679	38.3333	40	44	31	7	6	20
EXOC5P1	-1.95141	0.00355465	0.0160144	10.3333	4	8	19	28	28	64
BIVM-ERCC5	11.279	0.00389068	0.0172965	474.333	0	292	1131	0	0	0
AHRR	-1.61832	0.00411615	0.018147	35.6667	46	7	54	34	93	197
CAMP	1.23871	0.00412307	0.0181677	69.6667	71	41	97	27	24	36
FAM133A	-2.22852	0.00420258	0.0184736	5.33333	4	4	8	24	33	17
LINC00933	-2.17467	0.00421118	0.0185015	5.33333	5	5	6	18	25	30
COL21A1	-1.00905	0.00428814	0.0187646	47.3333	54	40	48	64	98	127
PFN1P6	1.06357	0.00431524	0.0188623	78.6667	83	70	83	27	40	47
H1-5	-1.65516	0.0044566	0.0193782	12.3333	13	8	16	45	39	30
HPS1-AS1	-1.75985	0.00450708	0.0195461	10.6667	13	8	11	44	22	41
HDAC9	-2.26001	0.00459306	0.0198562	8	16	0	8	53	33	22
CRISPLD1	-1.36871	0.00487302	0.0208206	24.3333	32	25	16	71	79	39
DTX1	1.24866	0.00528099	0.0222634	84.3333	94	36	123	44	29	29
KPNA7	1.57566	0.00534245	0.022465	40.3333	38	35	48	9	11	21
MMP14	1.05667	0.00552583	0.0230829	88.3333	69	87	109	28	58	43
NPTN-IT1	1.01756	0.00559446	0.02334	126.333	130	99	150	94	50	38
STEAP4	1.06078	0.00561753	0.0234125	107.333	89	101	132	71	52	29
FAM181A	2.08507	0.00571739	0.0237446	24.3333	21	19	33	6	6	5
PJVK	1.22253	0.00584104	0.0241062	82.6667	88	80	80	13	55	41
SLC30A6-DT	1.0835	0.00601609	0.024748	73.3333	87	74	59	34	32	39
CYP1A1	-1.31558	0.0060492	0.0248532	21.3333	28	12	24	48	58	51
ADAM2	1.23924	0.00644341	0.0262177	69.3333	54	97	57	20	35	37
MARK2P16	-1.04384	0.00648723	0.0263635	35	36	34	35	57	80	82
KLK12	-2.47459	0.00650748	0.0264197	4.33333	8	5	0	13	35	27
BMPER	-1.53976	0.00660531	0.0267444	16	15	7	26	38	62	36
TEX13C	-1.49191	0.00667121	0.026945	14	18	12	12	40	40	38
IGFBP7	-1.02105	0.00671024	0.0270429	48	53	53	38	122	68	104
ZBTB47-AS1	1.16853	0.00671708	0.0270572	67.3333	49	73	80	29	23	39
LIF-AS2	1.03876	0.00696171	0.0278384	78	98	63	73	31	49	34
APOL6	1.85729	0.00703384	0.0280712	33	20	30	49	10	13	4
PILRA	1.81468	0.007148	0.0284383	34	36	38	28	3	17	10
ADAMTS1	-1.15348	0.00717489	0.0285246	29.3333	29	19	40	50	80	64
PRDM1	-2.11602	0.00721299	0.0286485	6	11	3	4	33	26	17
CHGA	-1.81512	0.00746355	0.029466	9.33333	4	15	9	41	26	34
TMC4	-1.10585	0.00768005	0.0301473	33.6667	39	26	36	85	79	50
MEF2C	1.12646	0.00772379	0.0302757	60	54	57	69	24	27	32
LINC01143	1.62261	0.00773785	0.0303164	46	68	25	45	6	12	27
LINC00839	-2.34677	0.00775913	0.0303781	6	8	0	10	42	10	34
LINC01252	1.25835	0.00783898	0.0306543	56	39	47	82	20	23	27
TMEM270	-1.54263	0.00808403	0.0314855	16.6667	30	7	13	33	68	43
TAS1R3	-1.4502	0.0083853	0.0324669	14.6667	20	9	15	37	40	42
LRRC69	1.34447	0.00850987	0.0328335	44.3333	47	44	42	16	14	23
NCF2	-1.15276	0.00882339	0.0338449	26.6667	29	26	25	68	46	64
LNMICC	-2.95326	0.00896357	0.0343027	14	26	6	10	26	264	34
NDUFB8P2	1.53547	0.00965745	0.0364417	37.3333	35	31	46	6	18	15
TM4SF1	-1.08728	0.00968489	0.0365201	33	20	34	45	68	75	68
PGM5P2	2.17662	0.00968875	0.0365232	27.6667	33	21	29	7	11	0
PFN1P4	1.47996	0.0109258	0.0403858	35.3333	30	30	46	10	15	13
FOXP3	1.06871	0.0109465	0.0404238	85	82	54	119	37	23	60
RCN3	-1.07111	0.0111546	0.0410905	29	34	21	32	60	66	55
SLC16A1-AS1	1.32851	0.0114073	0.0418743	42.3333	49	35	43	11	18	22
CSE1L-DT	1.8707	0.0114755	0.0420591	28	27	30	27	9	12	2
CFAP300	1.47092	0.011592	0.0424104	42	35	24	67	17	17	10
ZNF385B	-1.30443	0.011702	0.0427652	20.6667	14	21	27	52	31	71
NEK9	-1.56878	0.0118038	0.0430277	13	8	14	17	20	63	35
FCGRT	-1.2794	0.0119444	0.0434583	19	21	11	25	36	47	54
KLHDC1	1.69968	0.0121832	0.0441711	30	44	29	17	9	11	8
MKX	-1.06025	0.0122871	0.0444989	32.6667	29	20	49	53	72	77
AK4P3	-1.04923	0.0125568	0.0452964	30	28	26	36	69	51	65
CD52	2.62697	0.0126477	0.0455446	23.3333	22	26	22	0	0	12
DIRAS1	-1.54511	0.0129121	0.0463647	127.667	197	143	43	348	419	381
NPIPB10P	1.09008	0.0129297	0.0464077	63.3333	53	65	72	39	22	28
ATG9B	1.4094	0.0131205	0.0469023	40	39	26	55	18	16	10
RNF222	-1.19407	0.0132177	0.0471743	22	19	18	29	59	42	48
AFTPH-DT	1.29571	0.0133378	0.0475308	42.3333	43	34	50	11	19	22
CORO2B	1.02857	0.0134651	0.0478808	65	63	61	71	21	32	44
ITGAM	1.08514	0.0135939	0.0482242	74.3333	57	82	84	23	26	59
PTPRT	1.62998	0.0137384	0.0485798	46	59	40	39	31	6	6
B4GALNT2	-1.28824	0.0138102	0.0487398	18.6667	13	16	27	51	48	36
GCNT7	1.02993	0.0141236	0.0496012	73	65	66	88	19	37	53
LINC01224	-1.88722	0.0143803	0.0503524	10	12	18	0	32	49	37
ALOX12B	1.17643	0.0147366	0.0513706	48	50	37	57	22	24	17
ST6GALNAC1	1.47702	0.0150844	0.0523716	42	16	48	62	12	16	18
S100A12	1.03547	0.0153445	0.0531299	76.6667	101	68	61	53	27	31
NLRC5	1.90329	0.015426	0.0533449	32	29	38	29	0	14	13
HM13-AS1	1.21812	0.0156161	0.0538664	51.6667	69	39	47	17	15	35
DMGDH	1.3164	0.0160517	0.055035	46	74	34	30	21	16	18
LINC01558	1.44046	0.0161341	0.0552484	37.6667	49	18	46	9	16	16
URGCP-MRPS24	-9.37713	0.0164047	0.0560005	0	0	0	0	0	352	26
DEFB4A	2.10969	0.0165393	0.0564013	27.6667	27	20	36	4	15	0
TMEM217	1.43123	0.0166039	0.0565513	47.3333	77	29	36	28	9	14
CLDND2	-1.42605	0.016608	0.0565538	14.3333	22	12	9	42	47	26
ADGRF3	1.39626	0.016641	0.0566545	36	39	38	31	8	19	15
TOX3	-1.06953	0.0166447	0.0566554	47.3333	55	59	28	157	63	79
TMSB15A	-1.21023	0.0170778	0.0577607	20	15	22	23	53	50	36
FGD5	2.10198	0.0172621	0.0582751	23.6667	31	18	22	0	6	11
HDX	-1.04433	0.0176789	0.0594872	33	38	18	43	63	47	91
ACAD11	1.55738	0.0184572	0.0616902	888.667	1389	667	610	406	110	377
ANKRD62P1-PARP4P3	2.02004	0.0193141	0.0639928	26	29	21	28	6	13	0
PHEX	-1.01977	0.0193937	0.0641949	28.6667	32	20	34	42	69	63
HELZ-AS1	1.6123	0.0194565	0.0643375	29.3333	41	14	33	11	6	11
SRRM5	-1.18247	0.0196353	0.0647979	50	39	46	65	59	242	42
LINC00578	2.09735	0.0197012	0.0649518	24.3333	33	15	25	5	0	12
POU4F3	-1.67033	0.0200098	0.0657585	8.33333	13	8	4	19	35	27
EPHA3	-1.17686	0.0200279	0.0657917	28.3333	37	8	40	60	75	50
CBY3	-1.56726	0.0201021	0.0659564	10	14	7	9	28	42	18
LBH	-1.7355	0.0202624	0.0663945	13.3333	23	17	0	59	36	41
BLOC1S5-TXNDC5	9.00815	0.0211538	0.068709	101.333	135	0	169	0	0	0
TNFRSF13C	1.12802	0.021339	0.0692559	55.6667	61	26	80	27	22	25
CACNA1G	-1.34641	0.0222399	0.0716576	14	16	17	9	43	34	31
LONRF3	2.00396	0.0225032	0.0723785	29.6667	27	24	38	17	4	0
PCDH10-DT	-1.06532	0.0225389	0.0724793	23.6667	25	26	20	52	51	47
HOXC-AS3	-1.0668	0.0231221	0.0739646	23	21	20	28	41	45	59
DDX11L2	-1.12722	0.0236984	0.075442	22	22	15	29	59	37	45
PHOSPHO1	-1.58124	0.024438	0.077408	8.66667	5	12	9	31	22	26
SLC26A5	1.59875	0.0245024	0.0774966	27.6667	20	44	19	6	10	13
TRGC1	-1.45902	0.0249986	0.0787288	10.6667	10	6	16	31	25	30
CSMD3	-1.88775	0.025609	0.0802217	7.66667	7	0	16	24	21	36
BRINP2	-1.05877	0.0256446	0.0802875	26.6667	31	32	17	51	45	75
GGT1	-2.21092	0.0261692	0.0816504	6	12	0	6	4	22	57
KLF7-IT1	1.36567	0.0261644	0.0816504	31.3333	37	31	26	11	9	17
SCN5A	-1.00781	0.0270678	0.0838192	27.3333	24	32	26	65	56	45
STING1	-1.0178	0.0280227	0.0862894	26.6667	23	20	37	62	54	43
LUCAT1	1.37801	0.0284975	0.0873919	31.3333	22	25	47	9	15	12
EPM2A-DT	1.09586	0.0287089	0.0878442	49.3333	59	38	51	11	28	31
LINC02814	1.09032	0.030223	0.0916933	54.6667	41	53	70	30	12	35
ANKRD45	1.14078	0.0304599	0.0923156	43	45	26	58	22	20	15
RALGPS2-AS1	1.11583	0.0305461	0.0924705	73	89	66	64	30	61	10
RASSF1-AS1	1.0597	0.0312175	0.09419	51.3333	58	48	48	14	39	22
LINC02804	1.28464	0.0321039	0.0963702	34.3333	44	29	30	18	8	16
DUTP2	1.65921	0.032234	0.0966399	22.6667	14	30	24	7	11	4

## Sheet: PT_RNAseq
Gene_symbol	log2 fold-change	p-value	Ajusted p-value	Basemean	PTDKO_Rep1	PTDKO_Rep2	PTDKO_Rep3	AAVS1_Rep1	AAVS1_Rep2	AAVS1_Rep3
NELL2	-2.89221	2.51567e-268	4.35589e-264	1897.27	314	592	399	3354	3762	3701
RND1	2.14563	6.02562e-200	5.21668e-196	3986.42	4609	8137	5995	1584	1448	1713
ELF3	1.2386	8.36802e-190	4.82974e-186	13172.4	13020	23488	16938	7781	8571	9027
GFRA1	-1.19722	1.17358e-174	5.08013e-171	19164.9	8029	15097	10624	26139	29787	30494
AGR2	-1.39417	2.14849e-157	7.44021e-154	7254.08	2788	5200	3598	10799	11483	11683
TMEM64	-1.24774	2.24883e-152	6.48976e-149	24948.9	9873	18786	14208	35818	37766	39940
ACKR3	-1.6242	3.83521e-150	9.48666e-147	5146.2	1830	3250	2198	8189	8256	8644
ADCY1	-1.54109	8.64552e-146	1.87121e-142	4116.71	1450	2579	2038	5971	6843	7029
ASCL1	-2.44943	6.99964e-130	1.34665e-126	1120.19	261	407	323	1952	2052	2110
ELOVL2	-1.7818	1.98304e-129	3.43363e-126	2287.87	693	1275	1009	3588	3907	3968
PEG10	-2.12685	3.30213e-127	5.19785e-124	1355.56	346	662	457	2157	2484	2504
PCDH10	-3.15514	6.55217e-126	9.45424e-123	920.496	166	215	145	1732	1738	1869
RAB31	-1.38137	4.11604e-118	5.48225e-115	4724.74	1823	3184	2534	6512	7711	7905
PKP3	-2.53485	6.81016e-116	8.4227e-113	1090.74	233	372	313	2031	1908	2056
NR4A1	1.20722	3.06946e-115	3.54318e-112	39317.2	40669	64592	51243	24191	24684	27986
SFXN2	-1.35217	5.67718e-112	6.14377e-109	3396.85	1332	2432	1763	4842	5284	5677
BAMBI	1.08086	3.4779e-108	3.54234e-105	14434.2	13841	25927	17115	9295	10187	10496
ADAMTS19	-1.80187	2.36651e-107	2.27645e-104	2220.84	623	1299	965	3473	3631	4073
CLEC3A	2.08769	1.97802e-103	1.8026e-100	1150.8	1249	2396	1763	453	494	470
SCUBE2	-1.20218	2.45746e-102	2.12755e-99	6625.39	2745	5177	3714	9681	10016	10129
EHF	1.99786	1.80262e-94	1.4863e-91	1672.61	1678	3568	2590	602	787	787
EPAS1	1.31793	2.84358e-90	2.23802e-87	3628.99	3666	6202	4988	2157	2279	2274
CALML5	1.58826	2.14446e-87	1.54714e-84	6018.35	6735	12454	7051	3104	3207	3397
CXCL12	-1.44326	1.52474e-86	1.05604e-83	2171.53	827	1453	1084	3189	3627	3449
MALAT1	1.35073	1.07257e-84	7.1429e-82	9279.48	9617	15688	12803	4709	5650	6627
JUNB	1.07833	8.43414e-84	5.40878e-81	25001	25505	43060	28949	16534	16781	18631
GABRP	1.98647	5.05045e-81	3.12316e-78	1026.32	1111	2149	1504	447	458	430
GABBR2	2.19928	1.06347e-80	6.34967e-78	1100.73	1218	2249	1760	326	500	454
L1CAM	1.13491	2.69452e-80	1.55519e-77	3776.69	3725	6451	4756	2449	2538	2648
NECAB1	-1.77701	6.53662e-77	3.65102e-74	1372.79	461	712	595	2106	2203	2569
CLSTN2	-1.83288	8.0217e-76	4.34049e-73	1179.79	356	656	483	1978	1867	2102
SERPINA3	-1.0998	1.11926e-69	5.38335e-67	4978.87	2208	4101	2866	7246	7140	7527
PRSS22	1.30968	1.18749e-69	5.55713e-67	2341.32	2377	4233	3017	1411	1516	1418
S100P	1.25842	7.93743e-69	3.52402e-66	2972.77	2892	5546	3751	1609	1972	2109
PADI2	1.52203	6.83224e-68	2.95751e-65	1526.66	1582	2898	2072	720	944	894
PLEKHS1	2.31722	5.9279e-64	2.33276e-61	576.493	633	1212	940	186	192	247
ABCA12	-1.29348	7.61448e-63	2.80521e-60	2114.96	793	1574	1195	2918	3313	3506
H19	-1.53413	4.37868e-62	1.57952e-59	2032.69	689	1519	865	3003	3348	3436
AGR3	-3.6255	4.14615e-61	1.46511e-58	270.799	28	43	45	489	594	537
PLAU	2.82596	7.69034e-61	2.66317e-58	407.449	478	860	719	122	102	100
PKP1	-1.13425	2.46448e-58	8.0514e-56	2433.2	1131	1889	1353	3290	3801	3724
COL12A1	-1.29132	7.456e-56	2.39075e-53	2367.2	921	1636	1395	3189	3948	3753
CRABP1	-1.12112	8.17316e-56	2.57306e-53	3598.49	1759	2786	1934	4960	5237	5747
BCAS1	1.08832	8.54974e-55	2.59717e-52	2651.68	2491	4480	3435	1725	1757	2006
NEAT1	1.04544	2.28831e-52	6.83139e-50	11937.7	11556	18322	15946	7147	8509	9645
KIAA1217	1.05385	7.91607e-52	2.32317e-49	2880.46	2640	4754	3817	1825	2145	2093
PGR	-1.20533	7.35028e-50	2.0864e-47	1696.1	761	1215	957	2276	2667	2717
THSD4	-1.10485	8.47682e-50	2.36736e-47	2499.46	1048	1990	1556	3558	3622	3846
CALCR	-1.69589	2.46276e-48	6.56042e-46	953.435	277	599	439	1454	1458	1812
NPY1R	-1.29732	3.07624e-48	8.07047e-46	1941.26	810	1239	1143	2741	3047	3136
TIMP3	-1.56604	8.87616e-48	2.29389e-45	872.141	309	515	438	1281	1483	1454
MAB21L4	1.25454	1.7108e-46	4.29311e-44	1537.85	1642	2619	1929	958	969	1004
PSCA	1.77289	1.02584e-45	2.467e-43	897.426	1089	1831	1076	376	440	502
COL4A5	-1.57189	3.79072e-43	8.00443e-41	919.413	302	539	490	1388	1562	1498
MTSS1	-1.18734	4.37711e-38	8.06273e-36	1191.45	540	916	635	1708	1797	1843
MMD	1.32157	7.72546e-38	1.37904e-35	1384.39	1261	2571	1936	688	941	944
PAPSS2	-1.14001	3.05792e-36	5.14058e-34	1238.46	534	986	716	1793	1855	1853
TMTC1	-2.49089	1.81392e-34	2.85528e-32	243.935	59	81	69	432	459	444
LINC01522	-1.45935	7.8925e-34	1.20937e-31	654.403	231	464	321	1002	1011	1090
CP	2.25616	9.41209e-34	1.42956e-31	374.022	435	742	599	93	179	150
EYA2	1.10316	3.03475e-33	4.37889e-31	1429.46	1490	2314	1754	882	953	1105
RASSF8	-1.23907	4.67448e-33	6.63431e-31	1580.68	567	1227	957	2047	2384	2786
FAR2	1.26079	1.87519e-32	2.51697e-30	1142.44	979	2158	1595	662	729	790
SLIT1	1.06122	2.34042e-32	3.11725e-30	1217.14	1204	2061	1467	819	854	874
TRIP6	-1.64481	1.14523e-31	1.49095e-29	661.616	272	369	265	895	1111	1248
STC1	-1.28527	5.50549e-31	6.8581e-29	1059.6	449	673	628	1573	1671	1602
NPHP3	1.48642	1.48266e-30	1.82072e-28	896.549	879	1636	1305	562	432	523
RPL36A-HNRNPH2	4.97155	6.14923e-30	7.19418e-28	692.99	789	1810	1357	19	65	57
SLC31A2	1.47225	9.87633e-29	1.10328e-26	1077.58	1286	2139	1134	544	601	706
ALDH1A3	1.24346	7.41531e-28	7.97492e-26	828.215	909	1377	1025	485	513	593
HCK	-1.6074	7.97565e-28	8.52459e-26	410.589	137	252	197	629	651	720
LIF	1.12236	1.22092e-27	1.27351e-25	1234.25	1244	1884	1672	822	802	883
LINC01016	-2.3205	1.40309e-27	1.42909e-25	220.315	48	94	71	412	397	373
KRT13	-3.62036	2.24784e-27	2.23686e-25	121.952	14	31	9	211	242	280
PCP4	-1.78957	3.35477e-27	3.30045e-25	335.841	102	200	136	505	541	644
AOX1	1.4698	1.09408e-25	9.61627e-24	539.148	508	1091	726	303	334	287
PHYH	1.03348	1.38029e-25	1.19499e-23	1352.89	1176	2518	1643	824	964	1097
SNRPA1-DT	-1.29452	2.59272e-25	2.16874e-23	656.889	257	476	367	853	1135	1040
VTCN1	2.17173	4.11169e-25	3.39019e-23	238.644	286	474	359	84	118	78
SGCG	-2.15067	5.75412e-25	4.67759e-23	211.352	55	97	72	337	356	425
MGP	-1.06945	6.95479e-25	5.61047e-23	948.658	425	815	539	1271	1332	1561
IER5L	1.27808	2.37641e-24	1.86188e-22	18531.2	20483	35019	20141	11052	11404	12532
EPHA7	-1.92799	3.54377e-24	2.72713e-22	250.227	66	136	101	415	425	441
PCDH7	-1.4895	2.72519e-23	1.97434e-21	452.814	172	269	237	729	723	698
LINC00052	-1.91678	3.06244e-23	2.20025e-21	293.505	76	177	109	426	465	620
GNAI1	-2.01787	3.08741e-23	2.20903e-21	288.933	106	110	101	476	502	515
NKAIN1	-1.5891	8.67711e-23	5.96207e-21	375.533	117	240	188	565	564	698
NPHP3-ACAD11	-11.5649	1.80132e-22	1.21835e-20	580.391	0	0	1	1008	1443	1320
DBNDD2	-1.0903	3.19655e-22	2.09653e-20	993.683	496	824	506	1329	1402	1648
FOXC1	-1.09044	3.77954e-22	2.45104e-20	727.931	351	558	421	1008	1103	1088
FGD3	1.46817	4.85895e-22	3.13928e-20	512.528	621	887	622	240	335	307
SYTL5	-1.1175	6.92015e-22	4.3891e-20	1222.83	440	1006	817	1568	1954	1911
ZNF503	1.27282	1.673e-21	1.03089e-19	621.17	661	1124	742	413	357	401
RNF150	-1.04682	1.79445e-21	1.09791e-19	764.12	353	637	450	1011	1205	1116
DHRS3	1.45289	2.11875e-21	1.29176e-19	426.397	479	781	530	196	270	275
TYRP1	-2.97798	2.33912e-21	1.42112e-19	133.365	21	50	18	222	322	223
PCDHA10	-1.53104	1.3027e-20	7.72472e-19	537.15	232	272	265	909	836	817
ZNF702P	-5.46719	1.64118e-20	9.66566e-19	71.6929	5	4	0	149	138	165
RTEL1-TNFRSF6B	1.13684	4.75312e-20	2.71618e-18	1300.81	1391	1916	1724	931	746	940
SP110	-1.38663	1.00839e-19	5.6874e-18	480.999	176	400	210	686	801	768
TNS1	1.08707	1.0309e-19	5.79549e-18	625.703	620	1040	781	394	470	431
PLCXD3	-3.55932	1.7567e-19	9.59535e-18	97.2175	13	28	4	188	203	188
DCLK1	-1.23387	4.59474e-19	2.3678e-17	727.457	262	503	488	1085	1046	1166
NTN4	1.26844	5.63549e-19	2.86995e-17	517.727	483	992	664	336	288	357
PARM1	-1.48894	6.95086e-19	3.48853e-17	333.809	132	199	168	532	534	519
SAMD4A	1.13301	2.10399e-18	1.01761e-16	607.368	588	1013	796	399	452	376
ZNF248	1.0238	2.74323e-18	1.31576e-16	740.388	698	1283	893	430	545	612
RAMP3	-3.12599	5.07859e-18	2.40262e-16	87.3684	11	22	19	126	172	214
FAM153CP	1.35877	1.29377e-17	5.81862e-16	525.232	563	855	729	225	375	360
KRT17	-2.50103	1.53936e-17	6.88735e-16	129.761	19	44	50	236	243	233
ZNF98	-4.27056	1.681e-17	7.4632e-16	66.0755	0	14	6	122	143	144
SLC27A6	-1.55447	2.57195e-17	1.12174e-15	295.116	86	197	156	432	453	544
ECEL1	-4.04612	2.43655e-16	9.7886e-15	73.1823	0	18	8	153	112	183
CPNE4	2.18244	1.20217e-15	4.42885e-14	119.528	140	245	179	50	43	46
KRT4	1.52147	3.01072e-15	1.06607e-13	234.54	251	456	300	110	149	134
MAMDC4	1.06605	4.48251e-15	1.55229e-13	539.993	547	916	636	322	360	451
DLGAP4-AS1	2.39162	5.53635e-15	1.9058e-13	132.986	124	310	228	49	59	29
RNF207	1.15186	1.03398e-14	3.44959e-13	397.432	401	681	493	251	245	302
DOCK11	1.09075	2.02115e-14	6.61554e-13	431.592	438	713	530	277	281	334
ADAMTS9	-1.58341	2.72359e-14	8.83125e-13	263.799	92	127	153	413	449	413
CDH18	-1.53627	3.22147e-14	1.0368e-12	219.893	85	155	87	323	353	383
PCDH19	-1.46229	3.98468e-14	1.26364e-12	318.656	133	165	177	414	589	512
ZNF22	-1.08071	4.49354e-14	1.41981e-12	470.969	202	421	262	581	729	769
TMEM26	-1.90278	6.45245e-14	2.00582e-12	143.86	35	87	57	239	259	236
RPS6KA6	-4.21988	7.83738e-14	2.42329e-12	48.3413	3	4	7	67	108	125
ADAMTS19-AS1	-1.26928	8.18266e-14	2.51657e-12	304.202	135	213	162	404	458	532
PGM1	1.0787	1.43799e-13	4.29901e-12	521.207	540	961	547	304	388	395
DPY19L2P1	-2.35359	2.26117e-13	6.61355e-12	93.0438	17	40	32	169	152	182
MT-TI	1.36482	2.9018e-13	8.37412e-12	249.039	236	473	337	124	154	175
ZNF716	-6.03254	3.11259e-13	8.93772e-12	48.567	4	0	0	84	99	127
ZNF551	-1.62443	4.45551e-13	1.26471e-11	434.872	173	347	108	728	722	665
ARHGAP36	-2.6154	9.72313e-13	2.67657e-11	93.5539	17	18	38	154	187	179
JSRP1	1.00434	1.40572e-12	3.81505e-11	1351.51	1586	2300	1232	873	1100	934
NIBAN1	-1.91573	2.8415e-12	7.40005e-11	136.396	33	93	45	240	214	243
SHC4	-1.26986	2.84206e-12	7.40005e-11	269.793	100	190	167	380	409	446
CPHL1P	1.83416	3.77685e-12	9.60296e-11	133.242	129	287	196	69	64	55
WFDC21P	1.27692	4.72033e-12	1.18797e-10	272.138	267	442	393	139	194	183
ZNF264	-2.33985	6.35531e-12	1.56979e-10	94.4486	19	27	42	147	182	182
RIPPLY3	-1.03809	6.50135e-12	1.60357e-10	450.622	187	398	278	655	698	602
NTSR1	-1.03104	8.08505e-12	1.97173e-10	395.718	173	353	233	509	559	657
PTPRB	1.45381	9.46751e-12	2.28633e-10	250.277	206	426	432	139	142	152
ATG9B	2.88406	1.03806e-11	2.49293e-10	57.6267	79	115	93	18	16	10
GHR	-1.23501	1.44199e-11	3.39239e-10	314.668	149	215	168	517	454	446
HCAR2	1.7369	1.74829e-11	4.07424e-10	127.475	130	276	170	56	65	70
DACH1	-1.98394	2.82059e-11	6.39248e-10	113.573	29	44	57	188	200	197
TMED2-DT	1.78884	2.88436e-11	6.52846e-10	1241.93	1780	2089	1470	662	515	614
ZNF347	-8.4464	3.185e-11	7.13432e-10	34.3232	0	0	0	79	62	80
ADAMTS13	1.08822	3.57501e-11	7.94625e-10	371.14	378	580	477	276	239	248
UGT3A2	1.25098	3.70986e-11	8.21434e-10	274.181	225	551	369	158	169	200
ELOVL2-AS1	-2.05796	4.36353e-11	9.57599e-10	97.7825	22	61	30	158	165	189
PLEKHA4	-1.12016	4.60824e-11	1.00241e-09	298.624	140	228	171	440	418	461
FAXC	1.18886	4.73357e-11	1.02324e-09	301.873	302	535	374	162	246	189
AMER2	-8.43309	4.8609e-11	1.04555e-09	33.9575	0	0	0	47	70	106
TRGC1	2.33445	5.99826e-11	1.28222e-09	80.3435	80	221	104	31	25	30
TESC	-1.58811	7.36574e-11	1.55155e-09	178.627	53	97	106	296	304	263
TNFSF15	2.80435	9.68088e-11	2.01957e-09	64.2051	80	157	91	14	29	9
PCDH17	1.97485	1.05612e-10	2.19266e-09	97.967	125	176	140	34	40	55
PCDHA13	-2.0173	1.48784e-10	3.03082e-09	189.094	59	87	67	157	508	331
PADI1	2.84351	1.52495e-10	3.10277e-09	53.4109	66	124	82	15	19	8
SEMA3D	-1.11743	1.61716e-10	3.27499e-09	360.524	142	249	261	503	519	574
NMB	-1.05135	1.76863e-10	3.55677e-09	342.497	161	305	182	483	463	548
SCIN	-5.47109	3.38429e-10	6.53277e-09	33.8135	4	0	0	70	73	69
IL20RA	1.19034	3.60465e-10	6.92724e-09	227.953	234	390	285	148	152	148
ZNF827	1.16079	4.12671e-10	7.84346e-09	296.958	299	467	402	185	236	171
ANKRD18B	-1.83921	5.62349e-10	1.04363e-08	158.629	78	66	44	274	243	279
RAMP1	-1.30967	5.80186e-10	1.07558e-08	207.287	73	165	112	260	367	334
UPK3A	2.61283	5.96945e-10	1.10076e-08	62.7375	90	126	88	28	14	14
CACNA2D1	-8.04224	6.03702e-10	1.10967e-08	25.9374	0	0	0	59	50	58
IGF2BP2	-1.06156	6.96521e-10	1.27487e-08	482.376	244	283	341	653	713	740
PDK4	1.17584	7.82188e-10	1.42414e-08	252.884	232	467	324	139	157	209
ZNF888	-1.11574	8.13837e-10	1.47402e-08	292.472	108	273	167	385	449	466
GCAWKR	1.04969	1.00544e-09	1.79847e-08	363.748	332	669	432	235	214	320
HDX	-5.55567	1.25882e-09	2.22414e-08	31.5051	0	4	0	63	47	91
PHF2P2	-1.55015	1.5655e-09	2.71882e-08	146.289	46	83	85	207	217	284
GASK1B	-1.23844	1.90421e-09	3.26127e-08	225.887	80	158	151	299	372	358
FAM13A-AS1	1.41002	2.30648e-09	3.90769e-08	171.984	159	284	275	100	88	116
ZNF415	-5.44226	2.93515e-09	4.89615e-08	29.1481	0	4	0	54	53	79
VGLL1	1.6378	3.1086e-09	5.15076e-08	109.36	104	219	161	57	56	59
PTGER3	-1.09077	3.15421e-09	5.20641e-08	321.822	129	281	193	362	475	593
ACHE	1.41028	3.33674e-09	5.49198e-08	231.122	253	408	300	88	124	202
CCDC85A	-1.23274	5.46699e-09	8.68449e-08	197.089	75	159	110	248	300	352
IDI2-AS1	1.08023	7.24331e-09	1.135e-07	392.12	372	574	566	244	217	356
LINC02005	-5.37418	8.89168e-09	1.37219e-07	27.7008	0	4	0	41	54	83
ENO3	1.21998	1.26405e-08	1.90986e-07	441.739	468	1011	357	243	268	352
SORCS2	-1.50323	1.46002e-08	2.18876e-07	132.125	35	96	73	201	212	220
GLRA3	-4.28923	1.5381e-08	2.29984e-07	31.7642	0	10	0	62	61	74
SOX18	1.24133	1.65837e-08	2.46689e-07	180.614	199	291	229	111	128	107
ABCA4	1.34343	2.06001e-08	3.0075e-07	187.478	168	345	271	116	83	144
TEX13C	-7.54024	2.084e-08	3.03998e-07	18.314	0	0	0	40	40	38
RASSF8-AS1	-1.02767	2.35161e-08	3.40168e-07	255.015	107	211	169	327	407	375
ZNF229	-1.05969	2.8102e-08	3.99824e-07	295.991	116	214	222	404	408	483
AMH	1.19323	2.83881e-08	4.03233e-07	335.295	420	628	282	193	219	249
ZNF506	1.16027	2.94348e-08	4.17414e-07	218.324	176	422	294	145	130	162
SDK2	-1.07929	3.23403e-08	4.56004e-07	249.479	138	175	137	323	373	399
ZNF93	-1.08162	3.60635e-08	5.02685e-07	223.759	95	177	143	285	371	329
KLK11	-2.19046	3.71676e-08	5.16499e-07	56.5723	14	27	18	99	88	113
CCN5	-1.04948	5.39547e-08	7.28158e-07	307.538	176	248	144	453	452	429
OTX1	1.06057	6.83963e-08	9.08889e-07	232.463	230	424	258	131	168	191
MUC20-OT1	1.0155	8.89981e-08	1.14233e-06	357.035	370	465	498	222	227	317
ITGA6	-1.02447	1.01625e-07	1.28723e-06	257.528	102	255	147	349	362	409
OLFML3	-1.44367	1.42364e-07	1.76362e-06	122.165	54	80	53	209	188	176
JAM2	1.66112	2.34528e-07	2.79288e-06	86.0532	91	165	122	31	45	59
WLS	-1.48763	2.39006e-07	2.83646e-06	104.052	32	72	56	158	152	187
GPR89P	-4.92414	2.55131e-07	3.00925e-06	21.7093	0	1	3	31	39	68
KRT23	-1.68059	2.72843e-07	3.19856e-06	102.422	36	52	50	180	113	210
ITGA2B	1.09337	2.81805e-07	3.29026e-06	208.109	236	326	237	143	127	158
RAET1E-AS1	1.76083	2.93764e-07	3.41606e-06	150.548	96.5	324	279	107	57.5	53
CACNB4	2.27763	2.95963e-07	3.43933e-06	51.3541	75	72	85	13	20	24
TMC5	1.40129	3.25768e-07	3.75794e-06	132.733	148	206	188	94	73	66
MT-TQ	1.27887	3.99584e-07	4.52208e-06	128.626	128	245	157	67	84	93
C10orf55	2.65909	5.183e-07	5.75649e-06	32.7575	40	63	58	8	11	10
TTC3P1	-1.15078	5.89089e-07	6.49273e-06	178.667	69	129	122	225	252	324
FOXN4	3.38191	5.97075e-07	6.5682e-06	30.9226	44	68	49	0	5	13
LINC02506	-1.21697	6.17269e-07	6.77314e-06	148.584	55	135	75	210	217	247
LYNX1	-6.11247	6.28833e-07	6.8913e-06	57.8409	4	0	0	132	108	126
PROCR	-1.01115	6.41903e-07	7.01676e-06	244.33	132	192	136	364	378	307
GPR132	1.05193	6.666e-07	7.26838e-06	265.887	229	427	380	150	158	256
INSYN1	1.05287	7.27804e-07	7.8762e-06	258.678	280	463	261	128	196	225
LERFS	2.52982	1.18174e-06	1.22088e-05	43.4872	61	54	86	7	13	22
SELENOP	1.05123	1.39804e-06	1.42343e-05	178.599	153	292	252	118	133	125
OXTR	-1.80711	1.8333e-06	1.81703e-05	64.4802	22	44	18	104	118	102
SELL	1.31113	2.17099e-06	2.12737e-05	138.025	103	258	220	76	72	110
MARK2P16	-2.39261	2.38104e-06	2.30709e-05	39.9152	4	17	17	57	80	82
MUC5AC	-2.63286	2.60541e-06	2.49517e-05	30.9129	5	11	9	43	57	74
VWDE	-1.98156	2.688e-06	2.56858e-05	64.7828	15	18	40	103	113	118
SCART1	1.348	2.98151e-06	2.81609e-05	101.741	103	181	137	45	68	74
ACTL8	1.06642	3.17316e-06	2.96931e-05	154.213	145	248	206	101	116	105
COL6A3	-1.96064	3.29635e-06	3.07193e-05	48.3094	14	25	18	72	96	81
PRUNE2	-2.14548	3.31478e-06	3.08578e-05	60.0333	29	19	11	74	119	125
ALDH1A3-AS1	1.1347	3.33201e-06	3.10014e-05	169.233	170	277	218	117	83	142
SH3TC2	1.05394	3.40142e-06	3.15625e-05	176.179	142	343	220	114	113	145
AMTN	1.02836	3.44918e-06	3.19543e-05	172.794	162	295	213	132	111	123
NCF2	1.41331	3.49355e-06	3.2348e-05	101.658	122	163	130	68	46	64
MIR3147HG	-3.78771	3.51424e-06	3.24875e-05	27.1723	8	0	1	50	39	74
EPM2A-DT	2.54155	4.35199e-06	3.94734e-05	72.647	129	207	23	11	28	31
SMARCA1	-1.18727	5.47926e-06	4.87584e-05	137.007	51	126	71	186	243	188
CRISPLD1	-3.04345	5.98966e-06	5.26719e-05	32.8964	0	17	6	71	79	39
NECTIN3	-1.43747	6.05045e-06	5.31255e-05	124.46	73	71	40	212	182	188
HCAR3	1.26582	6.1197e-06	5.37064e-05	120.565	136	218	134	53	82	96
HS3ST5	1.19428	6.19431e-06	5.43061e-05	156.138	184	214	204	111	112	81
TMEM117	-1.15747	6.39063e-06	5.58575e-05	138.544	73	106	65	177	238	204
SMPD3	1.58136	7.02934e-06	6.10091e-05	81.324	102	147	96	53	47	30
BNC1	-6.70879	7.82834e-06	6.73028e-05	10.2715	0	0	0	12	15	41
AMPH	-1.07311	8.59138e-06	7.34616e-05	139.191	57	116	88	180	218	214
PID1	1.12721	8.84553e-06	7.55229e-05	135.353	128	225	181	103	85	85
ASTL	-1.0249	8.94382e-06	7.62493e-05	161.803	84	128	92	218	264	218
VCAN	-3.18725	8.95393e-06	7.62979e-05	23.2954	0	7	7	38	51	48
MMP9	1.03354	9.07574e-06	7.72218e-05	160.605	170	267	179	118	117	104
SLC47A1	-1.66278	9.12369e-06	7.75917e-05	64.7796	29	34	24	107	115	94
ZNF699	-1.36789	9.3809e-06	7.95837e-05	86.3459	31	57	51	121	144	138
KL	-6.60908	9.82017e-06	8.30661e-05	9.60315	0	0	0	22	13	27
WNT3A	1.30391	9.83213e-06	8.3086e-05	112.083	103	221	144	87	57	63
EFS	1.31055	1.06728e-05	8.95346e-05	93.6341	100	152	127	62	53	58
AXIN2	1.00258	1.09527e-05	9.16162e-05	207.718	210	296	275	174	122	147
ARHGEF38	1.06483	1.17526e-05	9.74603e-05	167.666	148	235	262	96	126	130
UBQLN1-AS1	1.4356	1.24891e-05	0.00010278	91.2913	86	190	117	42	41	78
CDH5	3.68564	1.30005e-05	0.000106634	19.0392	39	34	22	0	5	4
RASL11B	-1.22619	1.3865e-05	0.000113028	130.585	56	89	78	242	169	173
ZNF492	-3.03227	1.44202e-05	0.000117278	147.899	5	69	31	227	331	300
IFI27	-1.90713	1.50078e-05	0.000121544	56.9877	17	43	12	109	72	109
CCDC103	1.26467	1.56667e-05	0.000126113	125.508	96	289	152	90	65	83
KIF7	-1.06552	1.58374e-05	0.000127251	151.332	68	142	77	216	190	257
LIMS4	2.05813	1.63529e-05	0.000130967	44.6288	53	64	83	13	28	15
HAR1B	1.79016	1.73216e-05	0.000138278	49.4915	53	97	72	19	32	21
PKD1L2	1.37013	1.86975e-05	0.000147965	120.785	121	217	165	36	76	110
TATDN2P3	-2.30659	2.04775e-05	0.000160656	34.2754	6	21	8	42	78	67
BRINP3	-6.43626	2.18987e-05	0.000170443	8.51882	0	0	0	18	18	19
IGF2BP1	-1.16587	2.2613e-05	0.000175659	120.744	63	71	73	155	192	193
LINC02015	1.59723	2.357e-05	0.000181788	76.1046	89	145	94	26	65	32
LIX1L-AS1	1.28463	2.46679e-05	0.000189497	129.16	83	325	159	71	82	92
TMEM238	1.14314	2.76742e-05	0.000210443	1051.75	1145	2218	883	670	660	791
GNA15	-3.6883	3.11567e-05	0.000234255	20.8313	0	10	0	46	48	31
ZNF655	-6.4086	3.19424e-05	0.000239016	8.3693	0	0	0	25	16	12
AFF2	1.24466	3.27726e-05	0.0002447	93.5828	103	136	130	57	62	60
ZNF99	-6.4142	3.42797e-05	0.000254525	8.37845	0	0	0	9	29	17
ZG16	1.87173	3.59376e-05	0.00026615	48.8451	42	111	76	11	30	28
KHDRBS3	1.15265	3.79544e-05	0.000279532	120.592	123	205	149	88	58	95
CXCL8	-1.14121	3.96929e-05	0.000291345	107.493	47	78	67	165	157	154
FILIP1L	-1.27192	4.51895e-05	0.000327113	105.589	27	80	76	148	154	183
MDGA2	-1.6031	4.61856e-05	0.000333627	65.7816	12	43	42	96	102	124
PCDHA4	-1.91742	4.71434e-05	0.000339727	54.2415	16	35	16	74	53	154
CDH26	-1.41059	4.88042e-05	0.000350786	85.7489	48	56	27	118	130	155
GRAMD2A	1.14064	5.29421e-05	0.000376775	118.862	124	188	153	52	97	93
ANKRD1	1.44405	6.13712e-05	0.000429351	71.1327	81	131	86	31	58	35
HEY1	1.05391	6.34643e-05	0.000442029	142.478	137	254	167	69	96	138
PCDH10-DT	-2.34799	6.42651e-05	0.000446529	27.9004	5	8	13	52	51	47
SERTAD3-AS1	1.54049	6.85149e-05	0.000471329	56.5548	70	92	74	31	35	27
BMP5	-2.90031	7.62492e-05	0.000519377	29.2994	11	0	6	58	48	59
NPC1L1	1.02008	8.36219e-05	0.000563829	124.551	108	233	149	85	100	81
FLT3	-1.3546	8.54384e-05	0.000574957	78.1702	22	73	38	104	137	125
KRT16	-1.02259	0.000100186	0.000662615	134.393	64	135	62	173	215	196
GJB7	1.01882	0.000101815	0.000671335	150.68	166	275	140	86	100	138
CYP4F23P	1.68147	0.000105798	0.000694425	44.3736	42	86	69	25	19	24
ADAMTSL3	-1.2025	0.000118051	0.000766998	119.523	45	94	72	196	222	116
PLLP	1.28748	0.00013384	0.00085831	1128.96	670	2496	1724	716	745	653
ATP2C2-AS1	1.20743	0.000135837	0.000870798	157.869	153	282	203	49	167	97
FGF11	-1.52248	0.000137901	0.00088272	87.0702	25	71	39	60	172	196
LINC00664	-2.3054	0.00013836	0.000885329	24.2264	5	12	7	38	44	49
C17orf107	-1.48028	0.000140913	0.000900333	69.7334	13	58	41	85	123	128
HTR7	-2.66192	0.000143995	0.000917997	29.4696	6	19	0	40	53	74
TPO	1.35804	0.000144746	0.000922446	141.644	124	244	223	29	123	111
SYNDIG1	-1.14949	0.000154078	0.000971896	105.13	30	89	75	153	164	152
PLXNA2	-1.28671	0.000160309	0.00100607	77.3915	29	46	53	120	103	131
NIPSNAP3B	1.21576	0.000186673	0.00115231	125.033	147	181	159	84	44	115
ZFP37	-4.18362	0.000203179	0.00124357	11.9966	0	4	0	25	22	27
ZNF578	-3.47598	0.000204146	0.00124904	13.9047	0	4	3	28	19	36
ZNF300	3.65251	0.000212495	0.00129509	16.624	24	23	37	0	8	0
LINC00865	-1.59944	0.000220166	0.0013348	55.1747	14	47	22	113	67	86
COLQ	-1.37305	0.000236243	0.00141934	59.6071	21	40	35	73	102	105
PAX5	-1.02009	0.000247162	0.00147167	111.622	47	106	64	160	139	185
B4GALNT2	-2.35513	0.000267001	0.00157678	25.3641	9	4	9	51	48	36
LINC00578	2.85934	0.000275998	0.00162438	21.4351	19	51	42	5	0	12
MAGI2	1.12624	0.00028328	0.00166271	93.0499	105	172	90	50	66	74
DUS4L-BCAP29	-1.28101	0.000285915	0.0016776	886.142	340	586	555	737	1817	1570
CST2	1.53667	0.000302088	0.00176	51.5989	55	88	76	19	43	24
UGT1A7	-5.77313	0.000313359	0.00181708	10.6234	0	1	0	31	34	1
SLC35G2	1.62662	0.000314082	0.00182067	64.1719	76	173	42	26	49	27
NCR3LG1	-1.01132	0.0003208	0.00185464	136.456	69	86	98	177	249	162
CLCA2	-2.41003	0.00033929	0.00194853	20.6317	7	6	5	32	43	37
ENPP3	1.62342	0.000342423	0.00196522	47.127	44	92	72	14	22	40
CYP4F26P	-1.73038	0.000356052	0.00203332	38.7652	17	14	18	56	72	64
HMGCLL1	-1.16471	0.00038258	0.00216766	104.472	34	61	89	143	179	145
MTND5P11	1.24287	0.000387448	0.00219166	70.0713	56	142	95	34	47	55
LRP1B	-1.05092	0.000388826	0.00219563	111.032	39	80	90	133	175	179
GGT6	-1.20094	0.000398002	0.00224257	74.3643	25	67	42	112	119	104
SAMD9	-1.24788	0.000405088	0.00228026	69.9856	29	53	38	75	111	136
MDK	1.11288	0.000420559	0.00235206	102.329	129	172	93	57	64	89
PRRX2	-2.44617	0.000426201	0.002379	23.6994	11	4	4	40	54	34
KIT	-1.01264	0.000450607	0.00250073	151.458	99	125	58	177	204	277
MRPS31P4	-2.357	0.00045704	0.00252935	22.5133	3	6	12	31	38	54
ANG	1.08155	0.00047706	0.00262648	109.604	130	191	102	76	92	58
AKAP12	-1.65686	0.000510928	0.00279606	38.8203	13	19	21	51	82	58
EOLA1-DT	1.81209	0.000512405	0.00280148	46.2141	60	65	73	17	40	9
ANKRD20A19P	-2.61158	0.000546185	0.00295907	25.1907	11	8	0	61	37	39
TCN2	-1.71416	0.000555022	0.0029985	35.7406	13	26	10	49	68	61
CALHM6	1.6435	0.000582827	0.00312532	54.7133	29	176	62	23	27	37
ZNF682	-1.05393	0.000602861	0.00322476	110.051	45	91	72	168	109	203
COPS8-DT	-1.02493	0.000604454	0.00323228	101.874	56	65	66	121	173	148
LINC02253	-1.58064	0.000628703	0.00334234	53.1858	8	49	26	95	96	66
GABBR1	1.22033	0.000688774	0.0036096	71.2685	79	116	88	28	50	62
GDNF	1.3061	0.000691479	0.00362158	57.4937	59	103	74	27	31	50
LIF-AS2	1.30938	0.000706504	0.00368912	61.4249	77	83	81	31	49	34
KLK12	-3.8296	0.000738055	0.00383306	12.3632	4	0	0	13	35	27
IGFBP6	-1.02908	0.000760975	0.00393557	97.1697	40	103	48	128	131	165
MAPK13	-1.03829	0.00079143	0.00406998	85.609	40	72	50	107	148	118
PCAT19	-1.38971	0.000791757	0.00407045	49.3725	20	41	19	77	70	84
C12orf60	-1.52476	0.000809952	0.00415535	41.2345	20	21	18	55	68	75
ADAD2	-3.4994	0.000867083	0.00440667	13.2842	0	0	6	25	22	32
SERPING1	1.26998	0.000874246	0.00443657	67.5712	93	89	78	33	54	41
FABP5P7	-1.12039	0.000883923	0.00447518	79.0826	33	62	49	133	121	93
BZW1-AS1	3.13878	0.000889294	0.00450106	25.7227	8	156	3	6	7	4
CHSY3	1.55216	0.000895052	0.00452359	41.5525	47	59	67	14	24	31
LPAR5	-1.27252	0.000915031	0.00460765	69.9507	33	64	23	122	108	87
TPTE2P2	-1.24485	0.000974612	0.00487025	77.6082	36	33	57	129	121	99
BPIFB1	1.26876	0.00102739	0.00510305	63.3357	54	117	91	44	25	51
MAOB	-1.37949	0.00114096	0.00559175	50.4107	23	22	32	71	77	87
LINC02910	-3.0521	0.00115533	0.00565302	13.2852	4	4	0	25	32	19
HNRNPK-AS1	2.04128	0.00115907	0.0056638	23.9832	25	30	52	12	9	9
ACAD11	1.81343	0.00119642	0.00581256	631.368	698	1235	901	406	110	377
DACT3-AS1	-2.39127	0.00120948	0.00586122	22.0307	0	12	10	50	31	38
FAM83E	-1.28402	0.00122916	0.00593995	78.7108	52	32	37	137	97	122
PROSER2-AS1	1.14273	0.00127676	0.00612897	68.2116	59	129	88	31	56	52
ADIRF	-1.52615	0.00129337	0.00619837	417.276	248	150	162	752	610	623
LINC00648	-2.17101	0.00130338	0.00623596	22.0156	8	12	3	42	26	48
RIN1	-1.16229	0.00136706	0.0065083	78.0269	43	62	32	144	93	107
CCDC92B	1.22911	0.00136925	0.00651514	57.6536	59	119	59	41	34	36
DOK6	-4.00063	0.00139156	0.00660677	10.2218	3	0	0	10	18	35
RGS22	-2.65475	0.00139795	0.00663163	23.4768	3	18	0	66	20	43
CDRT4	3.17265	0.00142322	0.00672991	12.1256	15	38	13	0	6	2
ZNF610	-1.79525	0.00144082	0.00680518	37.4911	4	20	26	38	62	92
FABP6	1.13427	0.00147624	0.00694782	62.5636	65	105	76	34	50	43
IL11RA	1.48283	0.0014859	0.00698571	47.2779	47	86	68	27	40	13
C15orf62	1.21025	0.00150132	0.00705056	59.1208	66	96	72	31	32	53
CDH13	2.54285	0.00150682	0.00707253	100.115	175	280	39	17	50	29
PDXDC2P	2.02702	0.00151944	0.00711825	21.2247	20	41	38	10	6	11
ZNF222	-1.63043	0.00152648	0.0071446	35.802	15	18	16	33	79	65
LINC01213	1.02154	0.00153121	0.00715986	89.1884	82	171	98	44	85	63
COL4A6	-1.71992	0.00154339	0.00721093	31.0063	14	19	8	49	62	42
CT62	-1.04858	0.0015715	0.0073245	82.1342	44	63	45	82	143	136
WDR72	-1.50836	0.0016376	0.00759376	39.3081	16	32	12	67	67	53
NECAB2	-1.01118	0.00164548	0.00762417	77.0829	34	73	43	103	111	120
PSG9	-1.80958	0.00167901	0.00776705	31.0636	6	10	23	43	56	58
COL28A1	1.20842	0.00174121	0.00801199	64.3053	67	117	75	40	26	60
CCL2	-1.73213	0.0018834	0.0085841	29.1543	8	25	8	41	56	49
TMEM132D-AS1	1.64439	0.0018851	0.0085896	31.8956	38	75	29	17	13	20
RPP21	-1.31598	0.00191398	0.00870058	84.2521	64	34	27	97	128	165
ARHGEF6	1.03761	0.00192548	0.00874139	92.7653	120	113	106	69	53	73
NBPF6	-1.20269	0.00195843	0.00887703	56.3596	21	46	33	60	95	102
EXOC5P1	-2.59305	0.00196651	0.00890667	21.4011	4	0	12	28	28	64
WNT11	2.31597	0.00201937	0.00911745	23.2895	33	51	27	0	11	15
SMAD9	-1.0241	0.00202506	0.00913596	87.2762	45	85	38	90	147	145
ADORA2A	2.75189	0.0020569	0.00925791	26.1001	60	62	2	6	2	14
HOXC-AS3	-1.71073	0.00210886	0.00945249	29.1199	7	13	19	41	45	59
HOXA10	-1.5259	0.002135	0.00955727	44.4523	10	35	24	76	38	100
RAB11FIP1P1	1.14956	0.00239504	0.0105549	73.0039	61	95	129	46	36	65
AGXT	1.20096	0.00250976	0.0109683	48.9889	49	87	61	31	30	35
STKLD1	1.3108	0.00259233	0.0112865	49.5496	49	73	78	22	24	47
TPPP3	-1.72233	0.00261373	0.0113568	29.1625	4	20	17	51	39	55
SLC2A14	-2.3435	0.00275845	0.0118966	18.7669	0	14	6	36	28	38
DCLK2	2.00984	0.00276411	0.0119056	23.4875	37	42	25	12	3	15
DSC1	-1.6709	0.00277563	0.0119404	27.3635	10	14	13	53	41	39
EPHA3	-1.37461	0.00279393	0.0120042	39.8438	17	25	21	60	75	50
NPY5R	-1.3646	0.00283321	0.0121428	47.3601	12	46	23	54	102	67
KRT6A	-3.49783	0.00284585	0.0121819	13.2999	0	0	6	23	5	52
NNAT	1.51814	0.00286009	0.0122368	37.6343	38	62	59	30	11	21
HSD17B14	-2.8483	0.00294638	0.0125533	11.7034	0	6	3	20	28	19
ZBED5-AS1	1.02309	0.00311916	0.0131986	185.49	162	356	215	68	247	85
SDR16C5	-1.26477	0.00321923	0.0135689	46.4306	14	39	28	69	82	61
GHRLOS	-1.11758	0.00328308	0.0138044	56.9182	23	40	40	69	95	89
LINC01176	1.05464	0.00337817	0.0141492	73.9332	77	113	93	30	70	57
KCNJ12	1.38569	0.00342156	0.0142964	45.6461	53	66	65	33	13	35
ZNF285	-2.39129	0.00353641	0.0147124	18.984	10	6	0	35	32	35
CST1	3.29001	0.0035819	0.0148766	14.2084	26	7	32	8	0	0
CEMIP	-1.02203	0.00365177	0.0151197	73.3732	22	75	49	101	113	105
SNX22	3.04345	0.00376598	0.0155109	940.822	2774	991	289	337	153	151
IBSP	-1.45053	0.00380961	0.0156691	35.2997	16	24	14	47	76	44
MYOZ1	1.22194	0.00389841	0.0159501	46.8502	57	82	47	27	27	37
ROR2	-1.14405	0.00396271	0.0161712	77.203	27	95	27	84	108	157
ALDH1A2	2.93611	0.0040132	0.016348	10.5123	19	16	15	0	4	4
IGFBP7	-1.09006	0.0041386	0.0167704	67.6464	36	49	37	122	68	104
PRPF31-AS1	1.47278	0.00418179	0.0169098	32.1687	30	58	49	17	25	13
FER1L6	3.43777	0.00425686	0.0171652	9.65441	19	19	10	5	0	0
MIR3648-1	1.45156	0.00433902	0.0174559	34.5791	45	59	38	26	14	19
TM4SF18	1.27697	0.00437352	0.0175742	41.019	33	85	55	21	32	25
APOL6	1.94375	0.00440772	0.0176707	20.5259	28	28	33	10	13	4
PRDX1P1	-3.68034	0.00444542	0.0177971	8.40648	3	0	0	15	13	22
CTSZ	1.35871	0.00466063	0.0185217	9291.37	12245	11837	12287	4839	3115	9058
MORC2-AS1	1.8403	0.00475036	0.0188006	30.7498	11	62	73	8	25	11
LINC01970	1.1955	0.00481022	0.0189941	48.856	63	86	43	28	33	35
SEPTIN5	-1.30703	0.00484446	0.0190988	778.46	413	273	500	833	1474	1311
PPP1R12A-AS2	1.1783	0.00505309	0.0197655	53.3802	66	106	41	31	34	41
ANXA1	-1.2518	0.00517417	0.0201508	49.2952	15	56	19	65	92	69
HTR2C	-3.56158	0.0053801	0.0208363	56.3532	15	7	0	62	112	168
IL2RB	-1.36666	0.0054871	0.021179	38.3542	11	41	14	61	62	56
UBE2FP1	-1.24583	0.0056143	0.021593	46.1201	10	38	34	62	78	71
CDH8	2.06236	0.00565249	0.0217109	15.2718	14	27	30	7	6	6
RPRML	1.72411	0.00566378	0.0217446	22.004	27	52	20	11	12	10
AVPR2	2.75723	0.00575739	0.0220747	10.5812	16	18	17	0	5	4
KRT18P7	3.0323	0.00586518	0.0224234	10.1631	16	7	24	4	0	3
LMNTD2	1.19114	0.00586788	0.0224288	53.6826	70	88	51	21	34	52
WFDC2	-1.00553	0.00587944	0.022468	80.9264	55	39	50	97	121	131
PHLDA1-AS1	1.66639	0.00595631	0.0226966	45.7581	103	37	31	33	21	15
NIHCOLE	-1.12297	0.00597801	0.0227693	55.406	33	37	27	63	72	112
CYB5D1	-1.09481	0.00606255	0.0230355	707.688	351	585	361	590	1613	952
NDUFB8P2	1.68073	0.00609068	0.0231323	25.1248	35	32	37	6	18	15
ZNF547	-2.63444	0.00610276	0.0231683	10.125	2	3	3	19	23	14
LINC00511	-1.0725	0.00625197	0.023636	62.6375	34	63	21	85	86	104
VWFP1	-2.46628	0.00630258	0.0237806	14.5806	7	5	0	29	18	32
HSH2D	1.02008	0.00631644	0.0238084	116.316	133	161	139	111	97	35
HOXD8	-1.04153	0.00642462	0.0241568	57.2136	32	49	26	82	87	79
ZNF488	-1.16328	0.00660965	0.0247184	54.6419	28	46	23	109	66	65
MIR3189	2.30123	0.00661687	0.02474	12.0736	15	23	19	6	3	4
OPRD1	-1.13015	0.00678585	0.0252503	52.7428	31	39	23	57	102	76
CDKN2A	1.03121	0.0068173	0.0253417	66.178	74	116	64	54	53	32
C16orf86	1.52678	0.00683888	0.0253946	31.2254	38	50	42	18	7	27
LIMS3	2.13617	0.00703479	0.0260562	26.5342	16	9	92	7	15	10
LINC01359	-2.41995	0.00714734	0.0263879	13.542	0	6	7	33	19	21
STAMBPL1	1.29625	0.00718274	0.0264954	40.2598	24	103	51	23	24	29
CCDC152	1.08652	0.00719423	0.0265208	63.9241	56	130	72	24	41	70
PDE6B	-1.18663	0.00719838	0.0265304	59.9414	13	63	37	51	108	116
LGI1	-1.47002	0.00723518	0.0266479	30.5074	15	12	17	42	39	64
HERC5	-1.09138	0.00728351	0.0267815	59.3086	19	64	32	107	76	76
PHOSPHO1	-2.84628	0.00744042	0.0272025	14.2195	8	0	0	31	22	26
PCDHGA7	-1.26984	0.00750802	0.0273918	36.7173	14	30	19	63	45	59
CXCL1	-2.68418	0.00752596	0.0274456	15.8616	0	15	0	41	25	22
ZNF849P	-2.32136	0.00753212	0.0274623	13.1834	4	8	1	25	16	30
ACOT6	1.51141	0.00756797	0.0275698	28.303	37	58	25	20	11	16
CTSO	-1.08364	0.00761143	0.0277049	49.6334	22	49	23	65	74	80
FCGR2B	-2.75813	0.00771244	0.0280136	11.0198	0	6	3	30	23	8
PAPLN-AS1	-3.00651	0.00784285	0.0284217	11.5771	6	0	0	20	16	30
AZGP1	1.18909	0.00798337	0.0288464	56.0186	54	97	74	16	33	64
SERPINF2	-1.5813	0.00830605	0.0298752	23.6629	9	10	14	30	44	41
PIK3CD-AS2	-1.19574	0.00836278	0.0300356	44.9842	15	43	24	41	82	83
TOB2P1	-1.07395	0.00845872	0.0303047	60.8365	31	65	20	72	83	114
SCARNA9	-1.84541	0.00854444	0.0305486	18.7114	7	9	7	21	23	52
SPDYE3	1.13686	0.00863342	0.0308105	90.227	106	56	164	39	67	78
RPL5P23	-2.63519	0.00878772	0.0312763	9.87182	2	4	2	8	30	18
RNF185-AS1	-1.14262	0.00911128	0.032249	57.001	18	44	42	118	73	58
SATB1	-1.87688	0.00956453	0.0336263	18.7271	4	17	4	19	44	34
ZNF284	-1.67458	0.0096565	0.0339015	21.7588	10	16	4	33	40	34
SV2B	-1.11857	0.00982515	0.0344099	46.2304	27	34	21	49	76	81
SNHG26	-1.05205	0.00984299	0.0344514	56.0974	15	46	47	73	84	89
FYB2	-2.65519	0.00991101	0.0346196	9.78903	0	3	5	17	16	22
PWWP3B	-1.03907	0.00993533	0.0346851	57.6636	23	53	35	107	62	79
LINC02908	1.08237	0.00999831	0.0348612	46.1684	35	96	57	32	30	34
LCTL	1.67004	0.0100173	0.0349121	19.5705	19	32	34	12	9	9
CYP2C8	-1.49735	0.0101407	0.0352654	24.7554	12	13	11	37	32	49
VSIR	1.23402	0.0101777	0.0353656	37.535	30	62	61	20	19	34
GAL3ST2	-2.56554	0.0107504	0.0369553	13.0029	7	0	2	20	35	16
IFI30	-2.50398	0.0108948	0.037389	321.518	6	179	127	679	525	548
FMNL1-AS1	1.2081	0.011002	0.0376704	41.3004	44	48	67	22	21	38
TACR2	-1.44238	0.0110084	0.037685	30.6454	17	15	13	44	29	72
LINC00534	-1.4572	0.0110894	0.0378649	41.3403	7	20	37	57	34	107
ZNF404	-2.78424	0.0114867	0.0390138	9.14851	0	3	4	7	26	20
SRRM5	-1.3115	0.0116819	0.0395991	73.7498	25	63	38	59	242	42
KRT89P	1.24284	0.0118802	0.0401691	40.1141	22	71	75	19	26	33
PROKR1	-2.75222	0.0119443	0.0403464	12.1979	0	11	0	10	30	31
TUSC8	-1.66453	0.0120214	0.0405674	20.7291	4	20	7	31	29	43
GSTM2	1.94752	0.0126759	0.0424862	14.3841	13	22	30	7	8	4
LINC02449	1.0826	0.0128078	0.0428288	49.7022	47	78	68	44	20	38
RASSF4	1.36495	0.0128928	0.0430631	28.4601	38	34	39	18	15	18
NBEAP6	-2.8471	0.0129607	0.043223	9.53211	0	3	4	35	10	7
CREG2	-1.03298	0.0131771	0.0438351	52.2143	14	50	39	78	72	77
DPF3	-1.12329	0.0132077	0.0439198	52.0121	28	24	37	96	52	79
HOXB2	2.33526	0.0133683	0.0443772	15.4883	17	52	11	12	0	4
TRGV9	2.46627	0.0138446	0.0456782	10.781	11	33	12	0	7	4
CNTFR	-1.54209	0.0138891	0.0458076	22.6265	7	16	11	19	46	46
SLFN11	-2.35703	0.0139958	0.0460979	10.3412	4	2	3	20	23	12
RTL9	-3.16176	0.0140323	0.0461891	8.36883	4	0	0	17	8	23
NEURL3	2.08549	0.0140602	0.0462572	19.2987	16	59	22	15	8	0
LINC00942	1.71551	0.0143639	0.0471132	17.8327	22	34	22	6	15	6
NOD2	-1.57919	0.0146133	0.0477899	30.0097	20	14	6	41	24	81
SSTR2	-1.11974	0.014623	0.0478091	40.8849	21	21	29	59	61	60
IRAIN	-1.1307	0.014669	0.0479304	43.503	12	45	26	58	50	87
INHBA	-1.60015	0.0147186	0.0480763	24.1573	17	8	6	33	36	48
TCEA3	-1.24169	0.0148311	0.04838	42.7365	15	15	40	54	59	82
KIF26A-DT	1.03117	0.0152873	0.049523	51.5573	63	65	62	24	49	37
LOX	2.23607	0.0159426	0.0513573	13.5913	18	36	12	8	7	0
SNAI2	-1.13317	0.0163945	0.052627	40.2937	27	25	17	54	68	56
PSMD10P1	1.79396	0.0166188	0.0531993	15.9435	21	26	22	6	13	4
LINC01441	1.05663	0.0167365	0.0535068	55.0675	52	86	75	19	33	66
GRAMD1B	1.76431	0.0171716	0.0547158	17.1037	26	14	29	7	10	8
CRYM	1.54901	0.0180464	0.0570101	18.8548	17	32	32	11	8	12
CLIP1-AS1	2.67556	0.0180621	0.057039	11.2807	19	18	16	0	10	0
FTH1P3	1.90369	0.0187015	0.0586054	12.4884	17	25	14	5	7	5
GSTM5	2.84428	0.0187036	0.0586054	10.9429	22	28	4	0	0	9
LGI4	2.99398	0.0189594	0.0592568	8.0627	17	13	8	0	0	6
FEZF1-AS1	1.36104	0.0191116	0.0596678	30.9819	41	37	43	10	13	34
PILRA	1.67568	0.0191828	0.0598253	19.0995	23	43	19	3	17	10
UTP14C	1.20274	0.0193946	0.0603446	52.6758	76	29	83	30	29	44
OCLNP1	1.32746	0.0194806	0.0605795	29.5836	43	45	28	21	10	23
MIR302CHG	1.55048	0.0195249	0.0606845	20.4366	18	43	29	17	10	6
SEC31B	1.10723	0.0198974	0.0615772	43.9224	54	69	45	30	16	44
GTF2I-AS1	2.05869	0.0205952	0.0632616	14.0431	17	10	33	10	5	2
AHRR	1.47669	0.0215137	0.0655828	183.738	148	351	297	34	93	197
ITGB7	1.32019	0.0217607	0.0661492	34.9178	25	87	41	36	17	10
SLC7A5P2	2.3855	0.023347	0.070134	9.70115	22	6	12	2	6	2
PM20D1	2.50702	0.0234544	0.0704011	8.31361	8	24	11	4	0	4

## Sheet: AF_Proteome
Gene_symbol	log2 fold-change	p-value	AFDKO_Rep1	AFDKO_Rep2	AFDKO_Rep3	AAVS1_Rep1	AAVS1_Rep2	AAVS1_Rep3	Protein
MNS1	-7.83971	0.0024296	247.604	247.604	247.604	44231.3	53516.2	72416.1	Beta-soluble NSF attachment protein
MOB3A	-6.49054	0.00329979	247.604	247.604	247.604	15242.8	25811.9	25737.6	Calcium/calmodulin dependent serine protein kinase
SLC46A3	-6.2315	4.98819e-06	247.604	247.604	247.604	18883.2	17534.8	19396.5	Cytochrome P450 4F11
ATP10D	-6.19818	0.0130729	247.604	247.604	247.604	26526.7	14984	13029.3	Syndecan binding protein
LCA5	-5.54333	4.91519e-05	247.604	247.604	247.604	12679.5	11361	10600.1	G2 and S phase-expressed protein 1
MGP	-5.47448	1.19066e-07	247.604	247.604	247.604	11264.1	10873.4	10888.7	Putative transmembrane protein INAFM2
TGIF2	-5.46025	0.00218717	247.604	247.604	247.604	10618.1	8419.08	13665	DIS3-like exonuclease 1
ZNF526	-5.21085	4.46449e-05	247.604	247.604	247.604	8502.68	10072.6	8935.45	cDNA FLJ75780, highly similar to Homo sapiens SGT1, suppressor of G2 allele of SKP1 (SUGT1), mRNA
TMEM219	-5.14081	0.0414795	247.604	247.604	247.604	7955.23	4208.35	14043.4	Keratin, type I cytoskeletal 13
SGCB	-4.90457	0.0142067	247.604	247.604	247.604	10278.8	7653.78	4315.92	LINE-1 retrotransposable element ORF1 protein
RPN2	-4.89824	0.0224394	247.604	247.604	247.604	9724.2	8965.96	3460.95	Bromodomain containing 8 (Fragment)
INAFM2	-4.64559	0.0279468	247.604	247.604	247.604	7152.95	8660.31	2779.39	Anterior gradient protein 3
MMUT	-4.19299	0.000589456	715.654	247.604	247.604	6180.31	8567.16	7399.32	Neuroblastoma breakpoint family member 10
GAMT	-4.07122	0.00954235	247.604	247.604	1156.17	5661.75	11745	10352.4	Protein NDRG4
SELENBP1	-3.76278	0.000764947	3467.66	247.604	247.604	19455.3	19292.1	15044.7	Zinc finger FYVE domain-containing protein 9
AP1S2	-3.35783	0.00750825	247.604	247.604	1090.33	4925.83	7231.19	4097.86	Poly(A) binding protein cytoplasmic 1 (Fragment)
KLHDC2	-3.22106	0.0319346	1572.71	247.604	247.604	4365.51	5074.02	9843.14	Keratin, type I cytoskeletal 15
RAMP3	-3.13638	0.007752	247.604	6372.75	2182.43	31857.7	17609.2	27937	Protein WWC3
IRS4	-3.1361	0.0184115	5106.59	247.604	247.604	10149	17168.7	21930.4	Transmembrane glycoprotein NMB
ZNF696	-3.07289	0.0343818	247.604	1424.61	247.604	3310.55	8182.89	4660.96	ER lumen protein-retaining receptor 3
MRPL4	-3.03361	0.0093981	2288.47	9353.87	247.604	43281.4	26754.3	27325.5	Tyrosine-protein kinase HCK
CTSF	-2.58049	0.0144687	247.604	10001.7	247.604	25241.8	15995.3	21549.4	Mannose-6-phosphate isomerase
ITPR1	-2.57476	0.027989	247.604	5923.85	247.604	16512	7980.98	13749.9	Catenin delta-2
TIMP3	-2.57434	0.0177404	247.604	7796.05	247.604	11997.9	16868.5	20516.3	Transforming acidic coiled-coil-containing protein 1
TESC	-2.3783	0.0115143	5375.56	247.604	247.604	9797.08	9138.75	11587.6	Schlafen family member 5
GRIN2C	-2.33225	0.0270238	247.604	247.604	8594.22	19760.7	13385.7	12626.9	E3 ISG15--protein ligase HERC5
SYCP2L	-2.29421	0.0197331	247.604	247.604	22810.6	34098.3	36461.3	43752.2	Protein PALS2
TAGLN	-2.27621	0.00218614	247.604	12028.8	9340.19	37997.8	32089.2	34624.5	Spire type actin nucleation factor 1
LRCH1	-1.99111	0.0411341	247.604	9710.9	247.604	11003.1	15257.6	14313	Apolipoprotein E
TMEM14C	-1.97761	0.0494513	1965.44	1135.59	2989.03	5061.64	11996.5	6927.04	Matrix Gla protein
COMMD2	-1.97739	0.0455548	247.604	15048	247.604	19718.4	24079	17408.7	Zinc finger protein 526
BUD31	-1.97567	0.0466471	4086.57	12979.2	6556.82	41900.7	34836.6	16173.3	Plakophilin-3
DNAH12	-1.96909	0.0440445	247.604	247.604	70159.8	99226.9	85032.9	92369.7	Retinoblastoma-like protein 2
WHAMM	-1.83843	0.0142349	247.604	9560.4	5607.56	18793.5	15249.7	21085.9	Ras GTPase-activating-like protein IQGAP2
HPDL	-1.83175	0.00112689	19854.3	16429.8	12396.4	52183	54467.3	66637.5	Villin-1
ZBTB46	-1.80836	0.0471539	1055.58	700.264	903.006	4652.15	2421.69	2238.63	Lysosomal proton-coupled steroid conjugate and bile acid symporter SLC46A3
CACNA1H	-1.72757	0.000363261	1541.58	1286.53	2305.3	5610.23	5997.58	5392.53	DDB1- and CUL4-associated factor 10
HERC5	-1.70428	0.00110151	3994.46	6902.21	6028.78	20676.1	18103.7	16374.4	RNA-binding protein Nova-1
SEC24C	-1.69626	0.0117542	247.604	29735.3	35853.9	67140.9	74336.7	71872.3	Roundabout homolog 1
CCNL2	-1.68101	0.0439553	5386.66	4443.88	247.604	7496.52	14414.5	10404.7	Doublecortin domain-containing protein 2
RHBDD1	-1.67749	0.0369374	8246.57	247.604	12017.9	18766.4	28726.5	18119.6	Ribonucleoside-diphosphate reductase subunit M2
ATG4D	-1.56627	0.0226367	247.604	5746.13	5217.2	11986.2	12206.3	9007.25	Keratin 13
ANKRD26	-1.55357	0.0089557	247.604	753.543	1020.02	2278.99	1888.8	1765.19	Solute carrier family 35 member E2B
NME4	-1.52196	0.0070901	7623.45	10124.5	6417.43	24695.9	26938.3	17764.4	Transmembrane protein 231
CAB39L	-1.49914	0.000578279	23443.5	20209.6	20789	68295.6	56001.5	57864	Large ribosomal subunit protein eL43
DST	-1.39917	0.0300153	5140.95	5252.81	247.604	10228.5	9674.56	8163.55	Alpha-mannosidase 2x
HCK	-1.32752	0.00406315	58532	38685.8	26050.2	101557	96236.4	111573	Zinc finger protein 93
VIL1	-1.32596	0.0130913	9084.17	10702.5	9104	19215.4	22631.2	30582	Nuclear factor interleukin-3-regulated protein
CRABP1	-1.31878	6.16182e-06	982577	983003	1.08136e+06	2.49669e+06	2.49939e+06	2.60465e+06	cDNA FLJ34977 fis, clone NTONG2005822, highly similar to Homo sapiens RAB11 family interacting protein 1 (class I) (RAB11FIP1), transcript variant 1, mRNA
SELENOF	-1.30228	0.0417547	7392.41	6123.79	7026.92	15954.1	23146.6	11562.5	Monofunctional C1-tetrahydrofolate synthase, mitochondrial
GADD45B	-1.28614	0.0479569	8042.32	247.604	5533.61	10544.2	10936.8	12231.1	Plastin-3
VHL	-1.28521	0.0175984	2996.84	5731.8	6638.97	10048.5	15335.3	12069.9	Homeobox protein TGIF2
GOLM1	-1.23921	0.0120076	52847.7	28001.5	26443.9	97415.3	72761	83109.6	Multiple epidermal growth factor-like domains protein 9
AKR1C3	-1.19448	0.00254423	150650	198522	162272	338556	440028	391921	Diphosphoinositol polyphosphate phosphohydrolase 1
ABCA12	-1.13707	0.00949697	11541.8	16384.7	12275.4	35649.8	26615.5	26152.2	Rho GTPase-activating protein 29
KRT17	-1.13503	2.42716e-05	244581	253445	226911	522954	517853	551319	Myosin phosphatase Rho interacting protein
DDX60	-1.12444	0.0389243	3388.52	1496.38	4212.02	5309.3	6268.97	8254.56	Large ribosomal subunit protein bL27m
C6orf141	-1.08876	0.0231695	4405.12	4349	5909.63	12924.7	10366.2	7897.58	Adipogenesis regulatory factor
GDF15	-1.01203	0.00264307	37894.3	32332.7	39342	77549.6	63449.2	79974	Lysophospholipase D GDPD3
VPS25	-1.00129	0.00177737	17341.5	17672.6	13709.4	28941.1	33978.1	34615.2	Proline-rich protein PRCC
DGKA	-0.979665	0.00831403	40200.6	22329.3	30236.4	54550.9	66149.8	62235	Rab11 family-interacting protein 4
MAOA	-0.977324	0.00472641	35429.4	31097.8	37293.3	60758.6	79132	64512.1	ETS translocation variant 3
DHPS	-0.964089	0.0143395	26842.5	24306.2	22901.3	39467.2	58470.3	46521.6	Enhancer of polycomb homolog 2
AKR1C2	-0.956487	0.0315335	28310.1	23151.9	14715.5	32864.3	46586.9	48971.4	LRP chaperone MESD
FABP6	-0.94984	0.0415235	14640.7	7915.35	6653.56	21993.1	18668.8	15761	BAG family molecular chaperone regulator 3
BCKDK	-0.941608	0.00791753	90403	89084.7	99425.2	144825	200097	190777	Thioredoxin domain-containing protein 16
ZMYM1	-0.928046	0.0401255	9774.11	4015.62	5118.09	12704.1	12684.8	10586.9	Prostaglandin E synthase
BAG2	-0.924609	0.0030941	34681.1	29846.3	40683.7	68723	71828.5	59157.1	Large ribosomal subunit protein uL4m
CD276	-0.916539	0.021939	178764	143787	155492	324441	227396	350508	Protein CEBPZOS
MUC5B	-0.915225	3.74923e-05	232264	212349	217747	421921	426254	400945	Cysteine protease ATG4D
DTD2	-0.911913	0.0386113	26684.5	24204	31802.4	47427.4	41328	66830.7	Galactose mutarotase
ARHGDIB	-0.890184	0.0184673	11323.6	13922.5	20385.5	25723.2	32244.7	26606.3	Ubiquitin-like protein ATG12
GFRA1	-0.886703	0.000420652	36896	46547.2	40309.7	78994.9	76382.6	73434.8	Ethylmalonyl-CoA decarboxylase
ECHDC1	-0.876727	0.0175027	34546.2	46588.6	45037	63968.8	92154.7	75553.7	Transgelin
TRAF3IP2	-0.876692	0.000826449	11132.1	13873.9	12638.6	21351.5	23976.2	23793.9	Heat shock protein beta-8
CDKN1A	-0.871588	5.55729e-05	79036.4	88343.6	79559.9	154913	149784	147123	Sterol O-acyltransferase 1
CA8	-0.867871	0.0210381	42948.3	27657.6	48650.6	63522.6	69430.8	84685.9	Protein-tyrosine kinase 6
NFIL3	-0.853918	0.00322418	16815.1	12153.2	18327.5	28552.2	29823.8	27106.6	Guanidinoacetate N-methyltransferase
KDELR3	-0.851021	0.000460773	49927.1	44664.4	41529.6	84523.5	84057.5	76950.9	Teneurin-3
BDH2	-0.841257	0.033593	30003.5	30747.1	38757.2	61430.1	71773.5	45075.5	Membrane-associated guanylate kinase, WW and PDZ domain-containing protein 1
DEK	-0.837219	0.0164429	183118	116995	113760	271413	218675	249338	Four and a half LIM domains protein 1
MYB	-0.836438	0.00850792	37905.5	23931	27386.3	57307.3	53058.5	48953.7	Forkhead box protein P1
AXIN1	-0.831618	0.0479071	16414.9	9106.48	9053.26	16573.2	23445.1	21513.5	Ras-related protein Rab-37
DDAH2	-0.830945	0.0460537	189343	273160	246507	305954	505766	449503	Neuronal cell adhesion molecule
ZNF98	-0.823899	0.029529	15226.2	10176.9	10255	24234.8	22062.9	16823.7	Methanethiol oxidase (Fragment)
GALNT4	-0.823758	0.00387674	21750.3	33177.3	31119.3	52412.5	48725.9	51165.5	Adiponectin receptor protein 2
PTPN9	-0.813788	0.0011224	34157.9	32475.6	36688	62557.1	54869.8	64193.9	Phospholipid-transporting ATPase VD
P4HA1	-0.813673	0.0135808	24753.1	43288	43989.9	69528.5	65953.6	61432.5	Integrin beta-5
AGR3	-0.806765	0.000982603	300601	282005	282868	537426	519216	457318	Transmembrane emp24 domain-containing protein 3
PPP2R2A	-0.804896	0.00608007	342325	387840	338578	527300	675177	664638	Nucleoside diphosphate kinase, mitochondrial
KRT16	-0.79204	0.000442087	71104.6	86452	76049.2	139753	129826	134914	Vacuolar-sorting protein SNF8
SULF2	-0.791658	0.00179834	81997.2	82805.4	76126.8	128261	134925	153879	Glycerol-3-phosphate acyltransferase 3
DBN1	-0.787246	0.00017489	357640	352123	330887	572249	593858	629823	E3 ubiquitin-protein ligase RNF26
STK19	-0.778187	0.0421113	11214.7	7738.56	15425.2	19615.6	22565.7	16776.9	Peroxisomal 2,4-dienoyl-CoA reductase [(3E)-enoyl-CoA-producing]
CMTM3	-0.776807	0.000466787	13600.1	12137.8	14338.5	22939.9	21758.1	23966.2	cDNA, FLJ96597
CDKN2AIPNL	-0.776712	0.00575106	17671.4	14274.9	12760.5	28125.8	24794	23672.8	Protein adenylyltransferase FICD
DEF6	-0.774595	0.0126645	21970	20352.6	17622.2	33532.6	39761.7	29253.9	Uncharacterized protein C1orf226
DAP	-0.771756	0.0289045	47933.6	57356.5	48081.2	71069.4	106612	84176.6	Cysteine and glycine-rich protein 2
TBC1D22B	-0.771434	0.0114913	13308	17912	16062.5	26952.4	23180.4	30576.8	Ankyrin repeat domain-containing protein 54
SUGT1	-0.7703	0.0226675	24859.8	43912.4	43792	57191.3	70022.9	64778	Four and a half LIM domains 1 (Fragment)
NTHL1	-0.768512	0.00206317	21353.7	23256.4	18188.2	32816.3	37569.7	36591.6	Gelsolin
NOVA1	-0.767655	0.0130522	29338.6	19089.3	24223.7	45147.1	36097.5	42444.9	Apolipoprotein B-100
SOAT1	-0.760931	0.0221386	6019.41	5202.62	7611.7	9573.84	9765.27	12576.2	Nucleotide triphosphate diphosphatase NUDT15
SEMA4B	-0.753331	0.0100124	34797.6	45428.4	27682.6	60855	63043	58001.3	Monocarboxylate transporter 7
AK4	-0.746613	0.0402078	70953.2	63225.4	59649.8	105327	134474	85413.4	Collectin-12
SNF8	-0.745068	0.0173274	56366.3	63308.4	64847	121333	102242	85692.8	Neuropeptide Y receptor type 1
CYB5R4	-0.742895	0.0317573	7952.33	7596.24	12665.8	15667.2	17639.4	13911	Methylmalonyl-CoA mutase, mitochondrial
PAK1	-0.742209	0.00108691	61200	59164.7	60475.3	96445.3	110375	95677	Elongation of very long chain fatty acids protein 2
ZFYVE9	-0.73415	0.0147201	18840.9	18324.8	19923.6	25586.6	34797.5	34579.3	Aldo-keto reductase family 1 member C3
GBP1	-0.733372	0.0280019	14202	10553.5	11263.6	19123.7	23905.1	16853.7	Phospholipase ABHD3
DHRS2	-0.73072	0.000878234	95143.6	107268	114570	165593	184222	176206	Beta-sarcoglycan
BID	-0.721221	0.0438169	86060.6	110235	122613	132994	198115	194635	Inositol-3-phosphate synthase 1
RPL22L1	-0.720597	0.0477986	11790.7	7288.14	6815.99	12142.2	14263.6	16265.3	Cellular retinoic acid-binding protein 1
MRPL28	-0.719671	0.014491	15132.2	18971.7	21665.1	26240.6	33351.5	32248.6	Collagen alpha-1(XII) chain
AGR2	-0.707364	0.0404132	429642	439155	422243	534860	847615	725559	Neuropilin-1
SMARCA1	-0.681394	0.0420739	23724.4	14120.2	25727.9	29814.6	38299.1	33836.7	Disabled homolog 2
DCAF10	0.703967	0.0183387	17042	16215.5	13339.1	11516.5	9296.13	7792.21	Syntaxin-binding protein 1
LMO7	0.705396	0.00125633	84532.1	87134.7	88631.1	60973.7	47969.5	50690.8	Dolichyl-diphosphooligosaccharide--protein glycosyltransferase subunit 1 (Fragment)
ANKRD54	0.70978	0.0037283	75364.2	70305.3	82232.1	43164.8	53295.8	42881.4	Ankyrin repeat domain-containing protein 26
ACSL1	0.716035	0.00157146	102504	109468	117817	71762	60194.6	68808.3	Ankyrin repeat and MYND domain-containing protein 2
GEMIN8	0.716662	0.0372171	24889.9	20979.3	16418.5	10649.5	13895	13357.8	DNA-directed RNA polymerase III subunit RPC8
KLF4	0.718797	0.0266541	39829.9	48470	51253.3	29563.5	34575.7	20653.9	Thrombospondin-1
PGM5	0.719597	0.00846414	99010.8	79611.4	102925	54783.6	54194.8	61995.7	Ragulator complex protein LAMTOR5
L1RE1	0.721979	0.00292042	566927	666875	670107	363372	421424	369478	ATP synthase subunit e, mitochondrial
CNKSR1	0.725811	0.0335318	33561.4	33850.3	24005.7	14535.9	19803.1	20937.1	Keratin, type I cytoskeletal 16
E2F8	0.729429	0.0401225	16849.6	22225.9	14769.6	9761.2	10213.1	12501.9	Haloacid dehalogenase-like hydrolase domain-containing 5
RBL2	0.731234	7.24381e-05	28154	27549	28415.2	17812.2	15739.6	17120	CD276 antigen
NUP214	0.732385	0.0109743	92254.6	117415	120789	58636	70099.3	70170.8	Serine/threonine-protein kinase DCLK1
CLIC3	0.733013	8.96896e-05	835650	845267	903800	519600	522481	513003	Raftlin
YAP1	0.737281	0.00834957	82610.4	105716	98672.2	64646.8	56447.7	51066.8	Cysteine desulfurase
RAB11FIP4	0.738928	0.00542464	15170.6	16921.4	14545.1	8092.51	11044.5	8807.23	Syntabulin
RRM2	0.739426	0.000472119	285554	315530	296081	166154	191687	179540	DEK proto-oncogene (Fragment)
CEP55	0.740195	0.0292796	101090	68892.6	89091.3	44660.9	50287.5	60148.6	Rho-related BTB domain-containing protein 3
IFT52	0.74875	0.00792579	64812.8	61704.8	79334.2	38822	39833	43851.3	Tyrosine-protein kinase Lyn
SYTL2	0.749106	0.000634022	175661	181237	200940	112984	108701	110212	Zinc finger BED domain-containing protein 5
HCFC1	0.749689	0.0210238	53976.8	70473.7	78648.9	38009.2	43420	39360.4	Rho guanine nucleotide exchange factor 38
VAV3	0.755894	0.00071997	43086.9	46455.7	48142.7	25029.7	26888.7	29616	Zinc finger protein 496
COBL	0.756876	0.00926802	84696.7	84860.6	70118	44015.9	40880.5	56937.8	PCNA-associated factor
USP43	0.758149	0.00680995	22861.6	26736	22595.5	11521.8	15208.6	15954.1	Taperin
TMEM231	0.764695	0.00619724	31675.5	30677.4	37032	21688.4	16220.8	20586.5	Sodium-dependent phosphate transporter 1
CSRP2	0.766465	0.000845855	75795.1	76710.7	67147.7	40394.8	45183.2	43546.7	Large ribosomal subunit protein bL28m
ZNF185	0.768843	0.00780925	31166	32608.3	40016.5	18524.4	20779.1	21610.1	Retinol-binding protein 1
KAT5	0.768849	0.0237464	39012.6	37121.2	26338.7	20226	20708.9	19204.7	Brain acid soluble protein 1
LYN	0.771761	0.0055117	92852.3	73016.2	87548.9	53533.2	45006.5	49887.4	Intraflagellar transport protein 52 homolog
CAPS	0.777275	0.000267928	497449	473405	452312	257482	283148	289742	S100P-binding protein
ATRIP	0.780084	0.0445641	11136.6	14289.3	18052.1	9643.47	8132.43	7542.77	ATP-binding cassette sub-family D member 1
GDPD3	0.786878	0.0101629	148236	135518	179689	99605.5	87578.2	81426.6	Apolipoprotein L2
RNF26	0.787969	0.0206379	14776.3	11160	14206.8	9783.99	6577.53	6887.67	Angiomotin-like protein 1
NR3C1	0.79056	0.0136315	20286.4	23258.8	24876.9	16809	10715.7	12031.5	BAG family molecular chaperone regulator 2
ANO8	0.791447	0.0420127	8313.34	10212.8	6801.69	5319.67	3509.82	5804.05	Calcyphosin
SPINT1	0.791498	0.00102111	16487.6	17049.2	18216.1	10276.1	8662.35	10961.4	procollagen-proline 4-dioxygenase (Fragment)
KRT13	0.793109	0.000238727	2.96488e+07	2.87115e+07	3.19536e+07	1.69131e+07	1.80399e+07	1.7167e+07	Divergent protein kinase domain 1B
AGFG2	0.80015	0.000147377	60933.1	59178.8	65340.1	36059.7	35620.3	34823.1	Protein phosphatase 1 regulatory subunit 15B
LSM14B	0.80053	0.0283008	102689	160063	139099	82140.4	75408.5	73169.5	Dehydrogenase/reductase SDR family member 2, mitochondrial
ETV3	0.801693	0.00840588	19946.4	25422.1	25624.5	13122.1	15386.1	12218.8	Killer cell lectin-like receptor subfamily G member 2
HSPB8	0.802684	0.0143829	197840	157594	156871	117107	78138.1	98449.8	Coiled-coil domain-containing protein 120
ISYNA1	0.806618	0.000137477	438239	397388	421945	243947	243320	231713	Carbonic anhydrase-related protein
SLC4A10	0.815329	0.0216348	22920.7	24495.1	19271.2	16789.4	11271.8	9835.59	Cell division cycle 7-related protein kinase
RFTN1	0.830102	0.0215055	53021.1	36822.8	44220.7	23856.2	21483.2	30070.6	Extracellular sulfatase Sulf-2
LGALS8	0.831101	0.0409396	30842	45801.2	44190	29675.3	18174.5	20070.6	Drebrin
NBPF10	0.840663	0.0152018	49685.6	65032.6	66703.9	27000.6	39744.2	34558.9	GTP-binding protein Di-Ras2
SLC35E2B	0.845639	0.00482855	27987.9	25675	29554.3	13177.3	13999.4	19130.7	Guanine nucleotide-binding protein G(i) subunit alpha-1
SET	0.846753	0.00541367	303325	275947	324917	181272	193127	128361	Karyopherin alpha 3 variant (Fragment)
APOL2	0.849992	0.00421083	19416	24281.7	22119.7	11788.4	10860.5	13865.7	Phosphoglucomutase-like protein 5
PSMB9	0.85152	0.00350149	31096.5	35703.8	28169.1	17144.9	16675.1	18812.1	SOSS complex subunit C
ESPN	0.856402	0.00265533	38356.3	45613.6	37622.4	22460.8	24028.3	20669.8	Krueppel-like factor 3
NECAB1	0.85807	0.00100242	33321.2	34761.5	37946.5	19670.8	17279.7	21544.7	Glucocorticoid receptor
SP4	0.8654	0.0411032	6586.5	6792.08	6230.29	4249.96	4851.97	1661.27	Breast carcinoma-amplified sequence 1
MXRA7	0.868906	0.0332303	18196.8	15625.1	13166.4	11814.1	6170.61	7744.3	Zinc finger CCCH-type with G patch domain-containing protein
STEEP1	0.86952	0.0446594	26303.5	23408.4	15862.5	11551.4	9713.15	14626.2	Cyclin-dependent kinase inhibitor 1
TEAD1	0.875029	0.0278804	13324.1	18625.3	13586.4	10299.5	6528.7	7999.89	N-terminal EF-hand calcium-binding protein 1
SH3RF1	0.875585	0.0272812	18744.4	17249.2	15701.5	10220.9	12599.6	5354.92	4-hydroxyphenylpyruvate dioxygenase-like protein
PTGES	0.890238	0.000306007	95431.6	88914.9	86957.1	46933	53693.4	45748.7	Tectonic-2
TACC1	0.898626	0.00209144	56866.9	67422	69925.5	36461.8	31989.5	35724.8	Ras-related protein Rab-3B
TRIM2	0.902023	0.00390021	15537.8	14444.7	14452.3	9138.05	8889.86	5750.73	Large ribosomal subunit protein mL49
KRT13	0.902318	0.00148436	208496	251870	244491	118141	133050	125926	Laminin subunit beta-1
CDK14	0.91003	0.0140226	17004.7	22004.3	23849.5	8949.6	12880.1	11622	ADP-dependent glucokinase
C1orf226	0.911116	0.00324113	79988.4	83345.7	72624.1	42065.6	33200.3	50210.4	Protein cordon-bleu
BCAS1	0.946153	0.000181114	502260	522349	464994	269363	254848	248915	Stonin-1
TPRN	0.950589	0.00634402	59361.3	71404.5	79572	35117.5	41412.2	32303.5	Zinc finger protein 250
SYBU	0.956358	0.00812977	15468.8	19172.9	14362.3	8994.18	6998.24	9262.16	Endogenous retrovirus group K member 113 Pol protein
KRT15	0.966741	0.000550116	223497	200498	193891	96871.9	111714	107562	NIPA-like protein 3
NUMBL	0.983551	0.00174268	47493.7	43819.3	43006.5	27821.5	20898.5	19209.8	Golgi membrane protein 1
PABPC1	0.983885	0.00599983	199393	262013	217216	133823	105238	104062	E3 ubiquitin-protein ligase makorin-1
TPPP3	0.989526	0.0387558	29042.6	38203.7	28080.9	8342.26	17383.1	22285.5	Amphiphysin
SOX13	0.990376	0.0180718	14789.8	10828.9	10024.4	6330.6	6432.19	5178.05	Endonuclease III-like protein 1
ARHGAP29	0.991582	0.00410386	24993.3	23430.5	29996.5	11251.1	13886.2	14302.3	Transcriptional activator Myb
HMGCR	1.01272	0.00196587	26659.3	24027.9	28703.6	15001.4	10712.7	13632.9	TBC1 domain family member 22B
INIP	1.01564	0.00917057	19434.3	16658.7	15055.3	7058.79	7203.32	11036.3	Amine oxidase [flavin-containing] A
CENPT	1.03283	0.0450273	16750.1	13931.5	8820.51	5900.53	6851.5	6554.65	Lebercilin
FHL1	1.05661	0.00138246	219846	227135	210071	106288	81429.2	128168	Cytosolic carboxypeptidase 1
RAB3B	1.05895	0.0111932	26455.6	27885.4	32318.8	19078.5	9170.46	13346.1	Polypeptide N-acetylgalactosaminyltransferase 4
PTK6	1.06202	0.00179206	30107.1	35570.2	37380.3	14744.4	18353.8	16262.3	Zinc finger protein 236
CRB3	1.06387	0.0379182	46249.5	54325.5	68145.8	36020.8	31938.3	12748.3	Catenin (Cadherin-associated protein), delta 1, isoform CRA_c
BAG3	1.06633	0.000243065	233429	259995	261644	127544	109729	123296	Synaptonemal complex protein 2-like
DCDC2	1.06768	7.92593e-05	360343	355920	383428	190435	164674	169536	Sodium-driven chloride bicarbonate exchanger
ABHD3	1.09368	0.000926234	24606.6	26312.2	25520.3	9150.35	14086.9	12579.5	Cyclin-dependent kinase 14
DOCK11	1.09666	0.00127485	54692.2	47103.5	44630.2	24115.9	20664.7	23687.9	Differentially expressed in FDCP 6 homolog
MAP7D3	1.11056	0.000387873	14384.2	16577.9	14539.2	7463.05	6804.13	6805.05	Clathrin interactor 1 isoform 2 (Fragment)
ADIRF	1.12405	0.00132299	33645.9	37970.3	38230.5	20640.3	14039.5	15718.3	Protein S100-A8
CLINT1	1.1257	0.0180745	41746.9	64152.9	66786.4	27756.2	27825.9	23556.8	Transcription factor Gibbin
CTNND2	1.13996	0.00092489	102505	121111	120503	48586	48146.4	59419.1	WASP homolog-associated protein with actin, membranes and microtubules
APOC3	1.14017	0.0464921	19069	11315.6	13650.9	5631.06	4496.57	9851.58	Keratin, type I cytoskeletal 17
ACACB	1.15229	0.00615574	53547.8	37858.5	46020.6	17892.8	20904	23033	Apoptosis-associated speck-like protein containing a CARD
LAMTOR5	1.17119	0.00535258	115808	138415	103391	58523	40243.4	60034.2	Transcriptional coactivator YAP1
ZNF444	1.17134	0.0279827	24087.9	16791.8	13978.7	7890.65	8295.38	8171.67	Plexin-D1
MTFR1	1.17923	0.00730472	27702.4	29965.4	37266.9	17967	11971.5	11983.4	Serine/threonine-protein phosphatase 2A 55 kDa regulatory subunit B alpha isoform
HPSE	1.18107	0.0405827	28817	31024.4	17587.5	6481.29	14272	13394.7	Arf-GAP domain and FG repeat-containing protein 2
RHOBTB3	1.19627	0.000795972	80761.7	92731.3	77892.2	33285.7	35031.6	41388.2	Deoxyhypusine synthase
GPNMB	1.19882	0.00199258	57886.5	47478.7	46459.3	24826.2	19359.4	21953.7	Calcineurin B homologous protein 3
MKRN1	1.20559	0.00705964	13347.3	16433.6	19023.2	7321.17	5606.44	8233.47	Acetyl-CoA carboxylase 2
PKP3	1.23768	1.9087e-05	235205	247357	236726	100264	109948	94805.4	Dolichyl-diphosphooligosaccharide--protein glycosyltransferase subunit 2
ADIPOR2	1.25282	0.00885079	50016.1	38600.9	36259.4	20069	20379.9	11952.6	Histone acetyltransferase KAT2B
GPAT3	1.27342	0.0118246	10683.1	16993.6	14693.7	6288.32	5029.68	6209.7	Proteasome subunit beta type-9
RBP1	1.28716	0.00579956	69385.5	69133.8	53794.5	21072.1	35854	21875.9	AP-1 complex subunit sigma-2
PPP1R15B	1.29371	0.0209197	21213.1	13894	19921.7	9211.76	9516.96	3717.57	Numb-like protein
LRATD1	1.30662	0.00645779	36649.6	27887.9	32141.7	18375.1	10138.6	10570.4	Ubiquitin carboxyl-terminal hydrolase 43
DIRAS2	1.31362	0.00247918	17600.5	14592.7	14926.4	7014.03	4333.6	7609.05	Ribonuclease H2 subunit B
LAD1	1.31754	0.00498856	29009.3	25691.9	36630.1	12136.2	11690.1	12817.5	Diacylglycerol kinase alpha
FHL1	1.32145	0.00234634	384038	450281	349770	188033	126490	159270	Nucleoporin 214
SNTB1	1.37267	0.0235558	26743.8	18842.8	34651.7	10452.6	9144.85	11388.6	Dedicator of cytokinesis protein 11
ROBO1	1.37366	0.00353942	95784.4	90843.5	84925.3	25244.6	27738.6	51812.5	Caspase recruitment domain-containing protein 9
PRDM6	1.3745	0.0382821	16231.1	18636.2	19939.1	8833.65	247.604	12056.9	Voltage-dependent T-type calcium channel subunit alpha-1H
MAPK13	1.38987	0.0313942	34910.2	34523	33587.8	21456.9	247.604	17608.3	Metalloproteinase inhibitor 1
CTNND1	1.39819	0.000414624	67603.5	59027.9	70405.7	28020.9	22864.6	23871.4	von Hippel-Lindau disease tumor suppressor
IGFBP5	1.40477	0.0382652	57984.4	61879.1	46461.4	247.604	30920.1	31649.5	MAP7 domain-containing protein 3
KLRG2	1.42103	0.00548403	56351.8	40095.8	51805.4	23146.1	19234.1	12984.3	[3-methyl-2-oxobutanoate dehydrogenase [lipoamide]] kinase, mitochondrial
ERBB4	1.48567	0.0439511	13354.8	18395.7	12025.5	8936.2	247.604	6447.88	Chloride intracellular channel protein 3
TMEM229B	1.50156	0.042376	13900.3	11631.8	17768.6	9247.44	247.604	5797.56	SH3 domain and tetratricopeptide repeat-containing protein 1
ABHD6	1.54306	0.0287356	13342.2	10919.8	15536.2	7773.92	247.604	5635.51	Dihydropyrimidine dehydrogenase [NADP(+)]
DIPK1B	1.57846	0.019684	3057.63	4151.92	3387.77	247.604	1206.34	2094.46	3-hydroxy-3-methylglutaryl-coenzyme A reductase
CEBPA	1.60432	0.024068	12357.4	9323.36	12813.1	247.604	6692.8	4404.29	Serine peptidase inhibitor, Kunitz type 1 (Fragment)
ZNF746	1.60865	0.0364283	10944.2	6536.07	6430.49	4219.11	2460.56	1160.79	CKLF-like MARVEL transmembrane domain-containing protein 3
E4F1	1.63235	0.0272356	8206.76	6567.1	5072.46	247.604	2792.72	3361.34	Tyrosine-protein phosphatase non-receptor type 9
STON1	1.69201	0.0202747	21474.7	18762.2	26734.1	9018.86	11460.8	247.604	Calcium/calmodulin-dependent protein kinase type II subunit delta
CALCR	1.69506	0.00596748	59209.6	56217.2	38795.9	14145.9	13649.3	19835.1	Mitochondrial fission regulator 1
NPY1R	1.7461	0.00218321	29027.9	25004	32803.4	8887.66	5344.47	11654	Keratin, type II cytoskeletal 80
HEATR1	1.74834	0.0299743	10336	8855.48	14480.6	247.604	6094.58	3680.13	Synaptotagmin like 2
TENM3	1.75715	0.017109	22082.6	16210.1	21213.7	247.604	6637.4	10718.9	AF4/FMR2 family member 3
PLEKHA2	1.77641	0.0369901	5019.41	7321.58	4167.81	247.604	3157.57	1413.89	GDNF family receptor alpha-1
CASK	1.77772	0.00918778	7804.17	6451.18	8228.26	247.604	3501.66	2807.95	Mitochondrial Rho GTPase 2
ZNF250	1.93835	0.00675759	9708.78	9538.71	10658	247.604	2501.2	5053.97	Protein LRATD1
NDRG4	1.98209	0.00414863	16185	19480.5	24789.5	4122.69	5497.12	5682.76	Protein lin-54 homolog
GALM	2.01834	0.000364294	225053	183367	202728	38644.6	61411.4	50800.5	Transcription factor SOX-13
MPRIP	2.08125	0.0226056	8493.95	9559.38	9080.09	247.604	247.604	5916.68	Long-chain-fatty-acid--CoA ligase 1
ZDHHC23	2.08773	0.0322107	46012.2	39353	37770	247.604	28472.5	247.604	Calcium-binding protein 39-like
BPNT1	2.09147	0.0416972	10108.7	9596.26	5855.85	247.604	247.604	5502.44	SPRY domain-containing protein 7
ADGB	2.26659	0.0242821	28647.5	39075.5	39751.8	247.604	21840.2	247.604	Actin, gamma-enteric smooth muscle
LAMB1	2.33311	0.0122943	17156.8	17049.9	16053.4	247.604	247.604	9479.24	MOB kinase activator 3A
NIPAL3	2.40852	0.0162883	6198.77	11918	11258.5	247.604	3100.69	2184.48	Meiosis-specific nuclear structural protein 1
ZBED5	2.41901	0.0150419	11282.7	13797.9	9406.41	247.604	247.604	5953.33	Espin
ZNF496	2.50667	0.0149428	3848.79	5469.69	3164.74	247.604	247.604	1701.36	Growth/differentiation factor 15
GPSM2	2.51661	0.0296255	3475.25	6829.33	4041.09	247.604	247.604	2011.75	Guanine nucleotide exchange factor VAV3
AMOTL1	2.55247	0.00173727	2303.94	3030.56	2772.84	247.604	886.796	247.604	Sickle tail protein homolog
CARD9	2.72055	0.00893392	18588.3	13339.9	23910.2	4508.65	3715.39	247.604	Ladinin-1
SDCBP	2.76697	0.00321591	13630.2	15488.5	14350.2	247.604	5890.94	247.604	Glucosylceramide transporter ABCA12
DPYD	3.32181	0.00083443	18306.7	20383.9	17262.6	247.604	247.604	5100.58	Cathepsin F
AMPH	3.57818	0.000333573	34304.9	31778	34132.3	247.604	7895.44	247.604	Insulin receptor substrate 4
GNAI1	3.60607	0.0082704	24995	37913.3	46802.2	247.604	8514.56	247.604	SET translocation (Myeloid leukemia-associated), isoform CRA_b
APOE	3.8688	0.000181937	19503.3	20911	18077.8	247.604	247.604	3508.58	MICAL-like protein 2
DAB2	4.34365	0.000271211	4700.37	5816.06	4565.14	247.604	247.604	247.604	Solute carrier family 11 member 2 (Fragment)
AMZ1	4.41138	0.0236522	4396.17	8030.57	3379.76	247.604	247.604	247.604	LIM domain only protein 7
ARHGEF38	4.66331	0.00179023	4981.94	7782.88	6057.51	247.604	247.604	247.604	SEC24 homolog C, COPII coat complex component (Fragment)
SH3TC1	4.90138	0.000121982	6497.44	7547.87	8153.99	247.604	247.604	247.604	Host cell factor C1
FICD	5.26395	0.00775224	11924.1	10788.9	5829.09	247.604	247.604	247.604	Calcitonin receptor
COLEC12	5.38348	0.000308862	9149.08	12019.1	9839.36	247.604	247.604	247.604	Rho GDP-dissociation inhibitor 2
PEG10	5.68445	0.0269152	15989.9	5434.21	16776.4	247.604	247.604	247.604	Serine/threonine-protein kinase PAK 1
AFF3	5.8793	0.0021652	11961.3	13168.3	18594.8	247.604	247.604	247.604	Mitotic interactor and substrate of PLK1
HERVK_113	6.14866	0.00552333	13494	23834.6	15371.3	247.604	247.604	247.604	Zinc finger protein 185 with LIM domain
SPIRE1	6.20588	0.0110781	11575.1	25517.7	17739.3	247.604	247.604	247.604	Tripartite motif-containing protein 2
CCDC120	6.58889	0.00276259	21765.6	18924.2	30814.6	247.604	247.604	247.604	Semaphorin-4B
RAB37	7.36347	6.58333e-06	38416.2	40947.7	42957.8	247.604	247.604	247.604	Uncharacterized protein C6orf141

## Sheet: PT_Proteome
Gene_symbol	log2 fold-change	p-value	PTDKO_Rep1	PTDKO_Rep2	PTDKO_Rep3	AAVS1_Rep1	AAVS1_Rep2	AAVS1_Rep3	Protein
CRYGC	-9.48978	0.000792302	247.604	247.604	247.604	143105	210257	180693	Gamma-crystallin C
ZIC2	-6.57811	0.000458854	247.604	247.604	247.604	20718.3	28012.9	22240.6	Zinc finger protein ZIC 2
UBA2	-5.79418	0.00417024	247.604	247.604	247.604	11470.3	18325.8	11423.2	Ubiquitin like modifier activating enzyme 2
TGIF2	-5.46025	0.00218717	247.604	247.604	247.604	10618.1	8419.08	13665	Homeobox protein TGIF2
MYOC	-5.21553	0.0226941	247.604	247.604	247.604	14048	5831.47	7720.52	Myocilin
ZNF526	-5.21085	4.46449e-05	247.604	247.604	247.604	8502.68	10072.6	8935.45	Zinc finger protein 526
NEB	-5.19896	0.00114289	247.604	247.604	247.604	10728.4	7096.9	9459.45	Nebulin
CSPP1	-5.06253	0.000190064	247.604	247.604	247.604	9093.87	8642.24	7086.8	Centrosome and spindle pole-associated protein 1
ATXN7L2	-4.66124	0.00865636	247.604	247.604	247.604	5508.67	4572.51	8714.15	Ataxin-7-like protein 2
USP31	-4.06253	0.0156815	247.604	247.604	247.604	4751.15	5413.26	2247.04	Ubiquitin carboxyl-terminal hydrolase 31
MMUT	-4.01095	0.000655153	878.502	247.604	247.604	6180.31	8567.16	7399.32	Methylmalonyl-CoA mutase, mitochondrial
KIAA1586	-3.7773	0.0332725	247.604	247.604	247.604	1874.58	5246.03	3064.37	E3 SUMO-protein ligase KIAA1586
TESC	-3.23353	0.00120797	247.604	2750.01	247.604	9797.08	9138.75	11587.6	Calcineurin B homologous protein 3
HSPA14	-2.78638	0.00154282	247.604	701.495	247.604	2752.04	3213.14	2290.81	Heat shock 70kDa protein 14 isoform 1 variant 4
MAFG	-2.70361	0.0154839	3817.57	247.604	247.604	7712.57	7910.36	12471.7	Transcription factor MafG
TRIM8	-2.64324	0.007998	5584.2	247.604	247.604	14076.8	10195.6	13707.7	E3 ubiquitin-protein ligase TRIM8
PTRH1	-2.62696	0.0106029	247.604	9047.89	247.604	15408.9	22404.4	21136.6	Peptidyl-tRNA hydrolase
PRKD3	-2.5691	0.0404546	4901.38	247.604	247.604	11760.7	14420.5	5844.32	Serine/threonine-protein kinase D3
TRAF3IP2	-2.5012	0.00120163	4269.19	247.604	7692.1	21351.5	23976.2	23793.9	E3 ubiquitin ligase TRAF3IP2
GRIN2C	-2.33764	0.0267396	247.604	8560.33	247.604	19760.7	13385.7	12626.9	Glutamate receptor ionotropic, NMDA 2C
RAMP3	-2.2881	0.0150472	247.604	9391.11	6209.38	31857.7	17609.2	27937	Receptor activity-modifying protein 3
USP6NL	-2.27922	0.0377118	14810.7	247.604	247.604	17547.6	32147	24602.5	USP6 N-terminal-like protein
ITPR1	-2.25205	0.0449271	7532.97	247.604	247.604	16512	7980.98	13749.9	Inositol 1,4,5-trisphosphate receptor type 1
CDCA7	-2.24821	0.00475743	2297.06	801.771	10001.3	21563.2	20684.6	19990.3	Cell division cycle-associated protein 7
PPP2R5B	-2.20992	0.0455222	5821.94	247.604	247.604	13378.4	6933.28	8914.62	Serine/threonine-protein phosphatase 2A 56 kDa regulatory subunit beta isoform
MVB12B	-2.08092	0.00153236	1515.67	247.604	1691.64	4992.49	4548.9	5075.6	Multivesicular body subunit 12B
CHN1	-1.98854	0.0360599	247.604	5826.02	247.604	9807.59	7154.03	8123.24	N-chimaerin
TP53	-1.94907	0.0294047	5332.8	3964.22	247.604	13023.3	8012.36	15818.5	Cellular tumor antigen p53
KRT23	-1.94771	0.00608072	1800.04	2186.98	247.604	4869.57	5073.74	6392.28	Keratin, type I cytoskeletal 23
CACNA1H	-1.91902	0.00326542	1899.45	2348.42	247.604	5610.23	5997.58	5392.53	Voltage-dependent T-type calcium channel subunit alpha-1H
XPA	-1.91685	0.0417375	247.604	247.604	4477.81	7473.74	5203.61	6100.58	DNA repair protein complementing XP-A cells
PROSER1	-1.83799	0.0174998	10768.5	247.604	4056.68	19428.3	15502.3	18956.4	Proline and serine-rich protein 1
HERC5	-1.79677	0.00966828	7984.12	7642.7	247.604	20676.1	18103.7	16374.4	E3 ISG15--protein ligase HERC5
ZNF174	-1.73613	0.011463	5101.07	4048.34	247.604	11457.7	8992.76	10854.8	Zinc finger protein 174
GPER1	-1.73537	0.0373846	2829.73	247.604	3609.7	9693.64	7562.62	5009.24	G-protein coupled estrogen receptor 1
MFHAS1	-1.66645	0.0423337	4125.09	16877.5	247.604	19901.6	25021.2	22532.2	Malignant fibrous histiocytoma-amplified sequence 1
SRA1	-1.63582	0.00865265	4297.76	3608.86	5670.3	17172.1	14381.8	10638.2	Steroid receptor RNA activator 1, isoform CRA_a
HPDL	-1.59788	0.00103143	19909.3	19468.7	17869.6	52183	54467.3	66637.5	4-hydroxyphenylpyruvate dioxygenase-like protein
RASSF7	-1.56395	0.0497543	247.604	4592.67	8518.31	17211.9	11351.1	10933.4	Ras association domain-containing protein 7
MRPL43	-1.51437	0.029314	10255	247.604	8897.28	22004.7	16106.1	17309.7	MRPL43 protein (Fragment)
MSI1	-1.38575	0.00943385	4574.41	15432.4	11966.2	24694.9	27934	30919	RNA-binding protein Musashi homolog 1
NFYA	-1.37893	0.0466019	5344.24	247.604	2750.18	7373.55	8072.38	6249.58	Nuclear transcription factor Y subunit alpha
SOCS2	-1.358	0.0135328	2917.26	5299.1	6926.36	12284.7	10789.7	15740.9	Suppressor of cytokine signaling 2
RBP7	-1.28562	0.00068118	16842.4	16519.5	12577.1	34510.1	40852.8	36630.2	Retinoid-binding protein 7
E2F3	-1.21892	0.0428928	3720.53	6049.18	6276.4	11515.3	16789.4	9046.24	Transcription factor E2F3
MYD88	-1.21536	0.0284544	5168.84	4231.51	6552.1	16297.6	10701.9	10042	Myeloid differentiation primary response protein MyD88
NME4	-1.20389	0.0330811	10328.2	4659.48	15138.5	24695.9	26938.3	17764.4	Nucleoside diphosphate kinase, mitochondrial
BDH2	-1.1856	0.0153915	31371.4	24064.6	22943	61430.1	71773.5	45075.5	Dehydrogenase/reductase SDR family member 6
CAB39L	-1.18331	0.00115508	24482.4	29499.8	26230.4	68295.6	56001.5	57864	Calcium-binding protein 39-like
ZFYVE9	-1.15022	0.00461453	14363.2	13936.4	14486.7	25586.6	34797.5	34579.3	Zinc finger FYVE domain-containing protein 9
MSX2	-1.08228	0.00321916	12211.6	17784.4	15891.2	35596.5	28286.2	33277.7	Homeobox protein MSX-2
DNAJC19	-1.08154	0.00222972	10841.2	11556.7	13374.5	21765.2	26509.5	27430	Mitochondrial import inner membrane translocase subunit TIM14
HDDC3	-1.05674	0.0103603	15111.1	12352.4	16689.4	28830.6	36921.7	26095.6	Guanosine-3',5'-bis(diphosphate) 3'-pyrophosphohydrolase MESH1
ACBD7	-1.05061	0.00522308	17308.4	18524.9	24376.5	42426.6	46671.5	35621.2	Acyl-CoA-binding domain-containing protein 7
HCK	-1.04528	0.00129613	46860.7	59464.6	43578.3	101557	96236.4	111573	Tyrosine-protein kinase HCK
COX8A	-1.03469	0.0399305	13472.5	19423.2	12971.8	26442.6	41174	26350.8	Cytochrome c oxidase subunit 8A, mitochondrial
DBN1	-1.02348	6.71365e-05	285605	293126	304740	572249	593858	629823	Drebrin
PCM1	-1.01784	0.00526845	6903.55	6514.91	6743.65	15830	11530	13465.9	Pericentriolar material 1
CAV1	-1.01402	0.00977046	50021.3	32266.4	42847.2	70001.1	95911.6	86800.1	Caveolin-1
PAK1	-1.00865	0.000547244	46931.6	51441.7	51971.3	96445.3	110375	95677	Serine/threonine-protein kinase PAK 1
ZNF770	-1.00265	0.0307016	5076.87	9229.17	3783.09	12434.4	13343	10467.3	Zinc finger protein 770
CDKN2AIPNL	-0.998166	0.0037927	13977.7	14817.3	9550	28125.8	24794	23672.8	CDKN2AIP N-terminal-like protein
DGKA	-0.984929	0.00135576	34152.9	29143.9	29131.7	54550.9	66149.8	62235	Diacylglycerol kinase alpha
ORC6	-0.979111	0.000271944	17349.3	14223.9	13411.4	29293.2	29610.7	29772	Origin recognition complex subunit 6
SMARCA1	-0.973238	0.00623467	18491.3	13397.8	20040.5	29814.6	38299.1	33836.7	Probable global transcription activator SNF2L1
RPA3	-0.968121	0.00572246	18664.6	13632.8	24702.7	35831.1	36424.3	39253.4	Replication protein A 14 kDa subunit
RPS29	-0.967794	0.0274336	9946.2	14752.8	22943.9	29703.3	35669.6	27809.3	Small ribosomal subunit protein uS14
CLSTN1	-0.957888	0.0203027	37141.3	23214.1	21902.7	43435.3	57633.3	58715	Calsyntenin-1
HMGA1	-0.954072	0.0109031	18298.9	13813.9	25057	40809.3	36996.2	32951.6	High mobility group AT-hook 1
RPL38	-0.94761	0.0311764	547007	275523	461194	645619	880540	949729	Large ribosomal subunit protein eL38
MCM10	-0.939991	0.0354328	16348.1	16713.2	11467.4	36164.7	26698.7	22565.6	Protein MCM10 homolog
DDAH2	-0.931484	0.0294404	203273	221091	236919	305954	505766	449503	N(G),N(G)-dimethylarginine dimethylaminohydrolase 2
WAC	-0.930612	0.00752002	8700.67	7228.16	8941.55	16584.7	17748.1	13072.3	WW domain containing adaptor with coiled-coil
STAT6	-0.912723	0.00849518	33683.7	43448.9	33343.2	63010.8	81046.8	63923.7	Signal transducer and activator of transcription 6
USF2	-0.889296	0.0110293	10035.2	12541.7	6834.45	17533.5	17065	19879.3	Upstream transcription factor 2, c-fos interacting (Fragment)
P4HA1	-0.888872	0.00436383	43219.5	35943	27178.4	69528.5	65953.6	61432.5	procollagen-proline 4-dioxygenase (Fragment)
CLASRP	-0.887333	0.0182636	21198.1	23395.2	37345.9	53812	53783.5	43971.8	CLK4 associating serine/arginine rich protein
ATP5ME	-0.884184	0.00163061	167697	187759	233237	372020	341755	372788	ATP synthase subunit e, mitochondrial
LSM1	-0.8759	0.0071303	10138.6	15243.3	16101.4	23110.4	27659.2	25358.4	U6 snRNA-associated Sm-like protein LSm1
RCN1	-0.865625	0.000107044	152985	141082	155630	259723	279375	280308	Reticulocalbin-1
MRFAP1	-0.858556	0.0271814	28035.1	24679.5	31392.7	58031.8	38045.2	56428.3	MORF4 family-associated protein 1
TMC4	-0.858121	0.0159597	18024.9	12113.5	21388.5	34296.5	26954.5	32150.6	Transmembrane channel-like protein 4
PLIN2	-0.857409	0.0466512	18802.8	18366.2	21081.8	45620.9	32825	27091.9	Perilipin-2
LLPH	-0.853786	0.0161455	136778	137383	124083	291673	204637	223411	Protein LLP homolog
HACD1	-0.849312	0.0399374	6499.83	5248.07	4713.24	9779.4	7572.5	12305.2	Very-long-chain (3R)-3-hydroxyacyl-CoA dehydratase 1
ZNF738	-0.846535	0.00791328	10985.6	15497.7	13747	25296.7	26343.3	20701.2	Zinc finger protein 738
ATG16L1	-0.82817	0.0335827	48857.6	42421.4	31527.5	55813.1	84133.1	78088.3	ATG16 autophagy related 16-like 1 (S. cerevisiae) (Fragment)
AK4	-0.823072	0.038726	53641.3	56570.1	73612	105327	134474	85413.4	Adenylate kinase 4, mitochondrial
KYNU	-0.817486	0.000297967	380388	389234	420798	655130	713261	729526	Kynureninase
TMEM40	-0.81721	0.0410531	5917.34	3609.11	3637.01	7442.26	9282.55	6469.14	Transmembrane protein 40
CNN2	-0.81654	0.000271742	228176	244738	238894	439463	422997	391157	Calponin-2
ASB6	-0.81505	0.0281845	24352.8	31298.7	35049.8	58969.4	59533.2	41073.5	Ankyrin repeat and SOCS box protein 6
NFIL3	-0.814212	0.000580525	17835.3	14514.9	16265.4	28552.2	29823.8	27106.6	Nuclear factor interleukin-3-regulated protein
KRT16	-0.810362	0.00147918	67212	73236.2	90209.6	139753	129826	134914	Keratin, type I cytoskeletal 16
GDAP1	-0.807548	0.015672	39670	62425.8	63864.3	92233	109954	88281.9	Ganglioside-induced differentiation-associated protein 1
VPS37B	-0.803244	0.0215265	12588	8085.98	8799.71	19959.4	16161.5	15311.4	Vacuolar protein sorting-associated protein 37B
AKR1C3	-0.787982	0.00684863	214348	211818	251736	338556	440028	391921	Aldo-keto reductase family 1 member C3
DCTN3	-0.787964	0.0045669	85680.3	86758.9	116580	157545	179729	161757	Dynactin subunit 3
KBTBD11	-0.78595	0.0459804	6932.54	7374.49	9153.83	16144.4	14408.2	9899.25	Kelch repeat and BTB domain-containing protein 11
PTBP2	-0.783149	0.00637819	25532.4	23701.2	22747.9	46749.6	35655.2	41467.1	Polypyrimidine tract-binding protein 2
RBFOX2	-0.782768	0.0198518	21724.2	18176.6	17043.6	34649.3	26106.9	37212.6	RNA binding protein fox-1 homolog 2
DECR2	-0.782324	3.33394e-05	211087	216291	216297	382341	357076	367638	Peroxisomal 2,4-dienoyl-CoA reductase [(3E)-enoyl-CoA-producing]
PALM	-0.780606	0.0246745	21555.8	28695	33452.9	41666.9	56755	45368.9	Paralemmin-1
MYO6	-0.770559	0.00151203	229232	273377	223150	396861	443567	397666	Myosin VI (Fragment)
PM20D2	-0.765548	0.00129305	35574.1	34118.7	35181.6	53927.2	64290.5	60070.3	Xaa-Arg dipeptidase
NOVA1	-0.759921	0.00531842	22546.9	23192.1	27303.2	45147.1	36097.5	42444.9	RNA-binding protein Nova-1
C6orf47	-0.756619	0.0386364	20192.5	18481	15000.5	25012.9	28122.8	37548.1	G4 protein
MRM2	-0.74696	0.0250408	10639	10875.1	16456.3	19562.8	24352	19809.1	rRNA methyltransferase 2, mitochondrial
GULP1	-0.740856	0.0330995	27797.6	35613.6	34044.6	65747.6	53481.9	43635.5	PTB domain-containing engulfment adapter protein 1
MACROH2A1	-0.737903	0.00241402	91750.2	88568.2	74377.9	154043	133057	137670	Histone H2A
PHIP	-0.733205	0.0105007	18516	16330.8	24482	35076.8	29892.7	33654.4	Pleckstrin homology domain interacting protein
ZNF691	-0.73122	0.0400423	4619.84	4032.16	2660.68	7444.5	5595.9	5739.13	Zinc finger protein 691
NR1H2	-0.725986	0.000874955	14268.2	12467	14023.8	24074.5	21354.7	21987.6	Oxysterols receptor LXR-beta
GADD45B	-0.723572	0.0109163	8286.99	6770.91	5358.04	10544.2	10936.8	12231.1	Growth arrest and DNA damage-inducible protein GADD45 beta
GFRA1	-0.717428	0.00270459	49522.3	38030.5	51606.5	78994.9	76382.6	73434.8	GDNF family receptor alpha-1
S100A9	-0.717135	0.0374174	11351.7	8416.94	7674.38	11932.1	16820.1	16361.7	Protein S100-A9
MED7	-0.716754	0.038093	21703.3	41118	38793.4	51617.1	52337.6	63046.9	Mediator of RNA polymerase II transcription subunit 7
CCDC115	-0.713261	0.0133117	20836.7	14305.7	23465.7	31846.3	34078.6	30163.4	Coiled-coil domain-containing protein 115
FBXW4	-0.702478	0.0216241	4253.99	2432.95	3240.91	5371.49	5757.57	5026.5	F-box and WD repeat domain containing 4
CPD	0.708942	1.11419e-05	606283	589192	580698	357285	359274	370049	Carboxypeptidase D
ITGB5	0.71316	0.0070069	202695	195576	166141	98543.2	129900	115839	Integrin beta-5
BASP1	0.718117	5.10271e-06	2.20413e+06	2.23085e+06	2.24417e+06	1.32889e+06	1.33032e+06	1.40099e+06	Brain acid soluble protein 1
PLXNA3	0.726722	0.00618353	22553.5	24770.4	23527	16880.3	14718.8	11214.4	Plexin-A3
ICE2	0.727841	0.0495535	6447.7	5247.51	8277.09	4620.54	3415.73	4023.14	Little elongation complex subunit 2
S100A14	0.729254	0.0020528	46431.9	55528.9	51269.5	30033.8	32962.9	29434.3	Protein S100-A14
RHOBTB3	0.73042	0.00204843	64531.8	60965.4	56517.5	33285.7	35031.6	41388.2	Rho-related BTB domain-containing protein 3
CLU	0.732569	0.0017352	256991	234369	274860	149202	167463	144470	Clusterin
DOLK	0.743375	0.0195976	62162.4	47766.3	50006.8	27851.7	38869.9	28814.2	Dolichol kinase
CALCOCO1	0.745114	0.0274635	41271.5	43206	42313.6	34359	24124	17163.2	Calcium-binding and coiled-coil domain-containing protein 1
MUC5B	0.74905	0.000118373	670747	730762	697869	421921	426254	400945	Mucin-5B
SLC1A4	0.75013	0.00114331	76259	71737.9	77868.3	48986.9	38532.6	46768.6	Neutral amino acid transporter A
PKP3	0.756733	0.00022492	173165	165452	176759	100264	109948	94805.4	Plakophilin-3
CSRP2	0.757055	0.00293046	81447.6	68970.8	67807	40394.8	45183.2	43546.7	Cysteine and glycine-rich protein 2
FHL1	0.77378	0.0375105	333503	244938	231626	188033	126490	159270	Four and a half LIM domains protein 1
AP4S1	0.780833	0.00411019	100308	113514	101365	52683.1	57756.2	73009	AP-4 complex subunit sigma-1
SLC2A6	0.78209	0.0426965	21418.5	24238	15463.5	14315.2	9765.5	11462	Solute carrier family 2, facilitated glucose transporter member 6
PMEPA1	0.784992	0.0174121	11706.4	14688	10518.3	7975.28	7036.94	6410.21	Protein TMEPAI
USP33	0.790164	0.0016474	17710.1	15495.2	18701.3	9686.4	10337.5	9992.58	Ubiquitin carboxyl-terminal hydrolase 33
IL13RA1	0.792	0.0188496	55715.5	69644.3	48960.4	35912.9	29420.7	35343.7	Interleukin-13 receptor subunit alpha-1
ARL13B	0.79438	0.0400635	17275.9	23597.5	16882.3	11785	7994	13522.4	ADP-ribosylation factor-like protein 13B
FLVCR1	0.798016	0.0219726	29972.2	23235.3	21218.5	13358.8	16601.1	12845.5	Heme transporter FLVCR1
BCAS1	0.799168	8.1763e-06	446203	453227	445885	269363	254848	248915	Breast carcinoma-amplified sequence 1
BNC2	0.81323	0.00869806	56030	66663.1	60960	30303.3	43974.1	30240.7	Zinc finger protein basonuclin-2
FGGY	0.820767	0.0240047	23453.1	31787.9	25055.9	11905.4	14585	18969	FGGY carbohydrate kinase domain-containing protein
ST6GALNAC2	0.821889	0.0134283	30612.8	40635.4	35264.1	15647.7	22514.2	22092.1	Alpha-N-acetylgalactosaminide alpha-2,6-sialyltransferase 2
VASN	0.836493	0.0210977	39414.3	47098.3	36557.3	17061.6	21926.4	29931.6	Vasorin
SLC38A7	0.836965	0.000894558	27605	31502.3	26947.9	16023.2	15916.5	16235.7	Sodium-coupled neutral amino acid transporter 7
B4GALT1	0.837498	0.00176151	52875.1	63603.2	57308.6	35047.1	32209.8	29996.6	Beta-1,4-galactosyltransferase 1
MEGF9	0.839934	0.00610974	61832.6	53235.8	49524.9	29478	26562.8	35912.4	Multiple epidermal growth factor-like domains protein 9
ZBTB17	0.848923	0.0243121	16003.4	12259.1	18589.4	7315.07	8982.42	9714.63	Zinc finger and BTB domain-containing protein 17
APOL2	0.855495	0.00258942	20074.3	21866	24128.7	11788.4	10860.5	13865.7	Apolipoprotein L2
IFITM1	0.85641	0.00155344	664552	656202	708764	317364	440568	363022	Interferon-induced transmembrane protein 1
TMEM132A	0.860271	0.000377585	109591	102131	105615	57313	52377.3	65114.4	Transmembrane protein 132A
QSOX1	0.862692	0.00174571	266681	231659	283164	136730	151195	141844	Sulfhydryl oxidase 1
IFIH1	0.862875	0.00141385	98122.6	95966.7	82904.5	48890.3	48052.1	55364.3	Interferon-induced helicase C domain-containing protein 1
PTPN21	0.87322	0.0221152	27888.9	24561.8	36679	17757.8	16093.4	14807	Tyrosine-protein phosphatase non-receptor type 21
RASSF8	0.876933	0.0231709	11026.3	8889.11	7505.7	5663.32	3886.91	5381.24	Ras association domain-containing protein 8
TCIRG1	0.877831	0.000279917	15455.5	15974.8	14630	7488.36	8729.17	8847.79	V-type proton ATPase 116 kDa subunit a 3
CDK14	0.886024	0.00303647	21809.9	21192	18819.3	8949.6	12880.1	11622	Cyclin-dependent kinase 14
SLC35E2B	0.89244	0.0207213	26788.2	34600.2	24572.6	13177.3	13999.4	19130.7	Solute carrier family 35 member E2B
FHL1	0.89311	0.0129098	174235	227428	184991	106288	81429.2	128168	Four and a half LIM domains 1 (Fragment)
CORO1A	0.902393	0.000607793	660198	580857	611310	295669	339200	356143	Coronin-1A
SOX13	0.916511	0.0192748	12863	8619.24	12381.9	6330.6	6432.19	5178.05	Transcription factor SOX-13
FAT1	0.918337	0.0400184	25784.6	19462.8	15970.4	8777.93	13542.2	10071.4	Protocadherin Fat 1
GPC6	0.92535	0.0100171	110925	89240.4	97172.3	39457.9	66920.6	50185.3	Glypican-6
GMCL1	0.932143	0.0016043	10367.7	11414.3	10714.9	5787.73	6663.31	4579.88	Germ cell-less protein-like 1
SCD	0.935192	0.00736908	252444	286527	257195	135601	179847	100925	Stearoyl-CoA desaturase
TMEM59	0.936475	0.00388558	219396	181056	170189	104387	96024.2	97753.2	Transmembrane protein 59
SLFN5	0.943406	0.000325322	171923	174632	192814	95580.9	98472.3	86420.1	Schlafen family member 5
HPSE	0.958257	0.0472675	16373.2	25386.7	24588.4	6481.29	14272	13394.7	Heparanase
LRP10	0.96118	0.00203138	108130	93406	89333.8	55702.8	49461.5	44236.9	Low-density lipoprotein receptor-related protein 10
CFB	0.985812	0.000747403	39142.3	38860.7	33113.9	18620.4	19078.2	18409	Complement factor B
APOB	0.99916	0.00390983	778454	670186	851439	456139	343792	350779	Apolipoprotein B-100
SLC4A7	1.02455	0.0495249	47006.6	34603.6	25345.2	20966.8	15880.5	15728.1	Anion exchange protein (Fragment)
PRODH	1.04455	0.034496	22200.7	28654.7	23423.1	5942.02	18176.1	11891.9	Proline dehydrogenase 1, mitochondrial
CFAP36	1.06439	0.00606156	8700.91	7780.83	9037.06	3423.98	3220.57	5557.91	Cilia- and flagella-associated protein 36
SLC20A1	1.06691	0.0331991	36767.3	33011.7	20830.4	15999.5	15092.7	12159.3	Sodium-dependent phosphate transporter 1
LAMTOR5	1.06746	0.00152227	104565	118357	109883	58523	40243.4	60034.2	Ragulator complex protein LAMTOR5
SPINT1	1.07242	0.00238941	19547.9	19460.6	23869.5	10276.1	8662.35	10961.4	Serine peptidase inhibitor, Kunitz type 1 (Fragment)
ATP6V1B1	1.0804	0.00187643	37699.7	39797.9	42257.8	14949	17982.6	23700.4	V-type proton ATPase subunit B, kidney isoform
GPNMB	1.08129	0.0140958	42364.7	57926.5	39654.5	24826.2	19359.4	21953.7	Transmembrane glycoprotein NMB
HMGCR	1.09357	0.0242967	32576	19971	31420.3	15001.4	10712.7	13632.9	3-hydroxy-3-methylglutaryl-coenzyme A reductase
NAP1L1	1.11404	0.0429884	339932	201316	371037	108340	135595	177538	Nucleosome assembly protein 1-like 1
LHX4	1.15349	0.00876772	7841.1	6443.35	9318.43	3335	4240.89	3034.49	LIM/homeobox protein Lhx4
FAM234B	1.19558	0.000334205	82403.8	84217.4	94851.4	39388.5	34419.2	40353.9	Protein FAM234B
ZNF563	1.22579	0.0309447	12204.5	13425.4	19456.7	9153.13	5483.63	4640.6	Zinc finger protein 563
LDLR	1.27245	5.53841e-05	48569.4	44623.8	47597	21265.4	18055.6	18959.9	Low-density lipoprotein receptor
RELT	1.27895	0.0363229	14775.9	11736.3	14782.5	963.974	8903.11	7150.26	Tumor necrosis factor receptor superfamily member 19L
LETMD1	1.2874	0.0460509	20923.3	23645.5	24405.2	247.604	15119	12891.2	LETM1 domain-containing protein 1
SLC16A6	1.2933	0.000312279	50399.5	46046.7	46143.3	23285	17573.9	17319.8	Monocarboxylate transporter 7
ANKHD1-EIF4EBP3	1.29883	0.0441245	14644.7	11332.2	8121.65	3971.95	7242.46	2645.18	ANKHD1-EIF4EBP3 readthrough (Fragment)
PADI2	1.30846	0.0290514	101974	110695	60526.5	42356.2	26574	41373.1	Protein-arginine deiminase type-2
LRP8	1.32324	0.0471827	15800.9	18462.3	21383.5	247.604	11195.4	10795.4	Low-density lipoprotein receptor-related protein 8
CDH1	1.33221	0.000818019	89112	98188.2	89499.3	44698.1	38763.3	26472.4	E-cadherin (Fragment)
LRATD1	1.33995	0.00549546	37949.3	30878.4	30111	18375.1	10138.6	10570.4	Protein LRATD1
PSMB9	1.35778	0.000626233	43087.4	50368.3	41434.8	17144.9	16675.1	18812.1	Proteasome subunit beta type-9
SLC1A1	1.35913	0.0358175	15042.8	14847.7	12476.8	247.604	8620.6	7647.38	Excitatory amino acid transporter 3
KLRG2	1.36148	0.00799583	38329.4	55992.5	47935.9	23146.1	19234.1	12984.3	Killer cell lectin-like receptor subfamily G member 2
ARSG	1.3918	0.00970351	22678.9	19491.9	15526.3	4895.16	10103	6989.59	Arylsulfatase G
AP1S3	1.45108	0.0460056	14786.1	9233.5	13996.9	7338.36	6318.52	247.604	AP-1 complex subunit sigma-3
TSHR	1.51385	0.0291885	29126.5	38645.7	37345.5	247.604	15941.5	20620.5	Thyrotropin receptor
IGFBP5	1.55193	0.0310626	52856.6	56394.8	74933.5	247.604	30920.1	31649.5	Insulin-like growth factor-binding protein 5
FGFR4	1.60833	0.000196923	77432.1	68457.8	79599	24696.5	21497.8	27761.1	Fibroblast growth factor receptor 4
APOC3	1.70908	0.00877212	20802.7	26877	17642.8	5631.06	4496.57	9851.58	Apolipoprotein C-III
USP12	1.77466	0.0437196	7164.5	10583.3	14003.9	247.604	5973.18	3059.07	Ubiquitin carboxyl-terminal hydrolase 12
BPNT1	1.81556	0.0465524	7398.14	6549.81	7163.61	247.604	247.604	5502.44	3'(2'), 5'-bisphosphate nucleotidase 1
DYNC1I2	1.88704	0.00748952	35002.8	45394.9	31844.8	6071.41	6951.33	17323.2	Dynein cytoplasmic 1 intermediate chain 2 (Fragment)
C4BPA	1.91394	0.0407029	32215.5	46030.9	21926.3	14271.4	247.604	12063.5	C4b-binding protein alpha chain
LAMB1	1.92666	0.0436077	13323.4	10902.1	13694.7	247.604	247.604	9479.24	Laminin subunit beta-1
TFDP2	1.99738	0.0450267	16958.6	15048.1	21577.2	247.604	12925.1	247.604	Transcription factor Dp-2
PLCL1	2.0403	0.0494326	2412.63	3267.46	4932.86	247.604	2084.93	247.604	Inactive phospholipase C-like protein 1
SFTPD	2.09375	0.0317062	10091	11560.3	14234.2	247.604	7911.71	247.604	Pulmonary surfactant-associated protein D
RCSD1	2.11046	0.0390938	73210.8	84409.8	106492	247.604	60666.3	247.604	CapZ-interacting protein
SLX4IP	2.22443	0.0204154	5261.27	3713.94	3315.05	247.604	247.604	2134.71	Protein SLX4IP
DPYD	2.29964	0.0210716	8762.83	11351.9	7435.38	247.604	247.604	5100.58	Dihydropyrimidine dehydrogenase [NADP(+)]
HPN	2.42106	0.0396253	6966.88	2934.33	6266.01	247.604	2523.53	247.604	Serine protease hepsin
PCDHGC3	2.43728	0.0184008	14320.5	8895.27	12787.1	6152.06	247.604	247.604	Protocadherin gamma-C3
PCSK7	2.48264	0.00783731	4902.02	3774.28	5518.01	247.604	2044.39	247.604	Proprotein convertase subtilisin/kexin type 7
SLC4A4	2.48956	0.0105534	8336.36	10432.5	11686	247.604	247.604	4927.59	Electrogenic sodium bicarbonate cotransporter 1
SDCBP	2.71749	0.0377433	20519.4	12399.6	9084.49	247.604	5890.94	247.604	Syndecan binding protein
DLG1	2.75761	0.00952811	2239.06	1595.1	1189.29	247.604	247.604	247.604	Discs large MAGUK scaffold protein 1
TET3	3.13665	0.0191428	6454.93	6780.32	3003.09	1351.15	247.604	247.604	Methylcytosine dioxygenase TET3
FRY	3.18441	0.0125912	10579	10738.6	5564.05	247.604	247.604	2461.8	Protein furry homolog
GNAI1	3.19719	0.00126335	29810.9	25455.6	27368.1	247.604	8514.56	247.604	Guanine nucleotide-binding protein G(i) subunit alpha-1
SUSD6	3.25954	0.00905047	15338.9	9869.56	18110.5	247.604	247.604	4028.11	Sushi domain-containing protein 6
AMPH	3.31829	0.00107019	29080.3	29730.9	24884	247.604	7895.44	247.604	Amphiphysin
SH3TC1	4.10314	0.021946	2055.4	5427.27	5283.05	247.604	247.604	247.604	SH3 domain and tetratricopeptide repeat-containing protein 1
APOE	4.16719	0.00153487	21698.2	20810.9	29422.4	247.604	247.604	3508.58	Apolipoprotein E
COLEC12	4.23899	0.00464509	6212.97	4078.14	3735.13	247.604	247.604	247.604	Collectin-12
HMGCS2	4.6289	0.00631183	4798.21	8353.45	5227.05	247.604	247.604	247.604	Hydroxymethylglutaryl-CoA synthase, mitochondrial
PEG10	5.41069	0.00098705	8320.43	12401	10876.5	247.604	247.604	247.604	Retrotransposon-derived protein PEG10
RAB37	6.36952	0.00415537	27139.3	15709.8	18568.9	247.604	247.604	247.604	Ras-related protein Rab-37
CREBRF	6.69521	2.93891e-05	25075.9	23932.3	27964.7	247.604	247.604	247.604	CREB3 regulatory factor
PDGFRA	6.96249	6.55643e-05	32084	33162.3	27393	247.604	247.604	247.604	Platelet-derived growth factor receptor alpha

## Sheet: SMARCA1_RNAseq
Gene_symbol	log2 fold-change	p-value	Ajusted p-value	Basemean	SMARCA1_Rep1	SMARCA1_Rep2	SMARCA1_Rep3	AAVS1_Rep1	AAVS1_Rep2	AAVS1_Rep3
FOSB	3.52707	0	0	7232.66	14049	12794	13901	1257	1159	1010
SIK1	3.42978	0	0	3147.1	5991	5560	6080	501	615	472
NR4A1	2.6414	0	0	23213.4	41830	39578	40931	6252	6322	6441
ID3	2.36432	0	0	3745.82	6170	6148	6880	1198	1255	1162
DUSP1	2.30055	0	0	5344.94	8781	8465	9979	1792	1819	1740
BHLHE40	2.04414	0	0	7548.02	12586	11534	13095	2847	2819	3065
FOS	2.04096	0	0	26744.8	43819	41690	46210	10059	10929	10048
IER5	1.84558	0	0	6796.8	10634	10305	11616	2927	2931	2917
HES1	1.63739	0	0	10798.6	17093	15147	17868	5258	5409	4924
HMCN1	2.36003	1.51702e-294	1.46904e-291	2587.08	4419	4182	4655	824	796	880
SHH	2.01358	8.22263e-268	7.07786e-265	2705.83	4383	4172	4726	1116	1059	1011
NRARP	1.7127	4.29233e-267	3.50028e-264	4544.44	7286	6662	7377	2056	2311	1943
NELL2	-2.89221	2.51567e-268	4.35589e-264	1897.27	314	592	399	3354	3762	3701
SAT1	2.73322	3.43453e-261	2.41885e-258	1515.8	2667	2567	2831	350	419	407
ATF3	2.95891	2.66594e-227	1.72108e-224	1481.51	2727	2418	2906	298	327	376
RHOV	2.36765	3.3908e-227	2.10148e-224	1582.38	2847	2529	2741	521	548	456
CXCL12	1.55993	1.40218e-209	7.75906e-207	2184.09	3374	3111	3505	1066	1151	1066
TUFT1	1.67084	8.37766e-209	4.47598e-206	3459.58	5396	4870	5882	1557	1790	1564
NR4A2	2.67116	3.64652e-188	1.82255e-185	2297.63	4401	3928	3809	551	695	606
KLF10	1.72814	6.44162e-187	3.11895e-184	6218.34	10546	8605	10157	2683	2859	3008
MAFK	1.81826	5.9155e-183	2.69573e-180	5543.87	9422	8555	8423	2379	2426	2458
TIPARP	1.61973	1.06249e-181	4.70349e-179	1968.07	3137	2707	3266	947	994	927
SOX9	3.34732	2.62808e-175	1.10053e-172	636.181	1218	1059	1277	113	124	101
ID1	1.85826	2.9251e-175	1.19267e-172	4902.6	7496	7317	8736	1991	2078	2215
GFRA1	-1.19722	1.17358e-174	5.08013e-171	19164.9	8029	15097	10624	26139	29787	30494
MDK	2.61298	2.11269e-172	8.18349e-170	1567.83	2682	2506	3077	488	434	385
LINC01522	2.31427	1.17018e-159	4.12064e-157	1782.88	3003	2837	3252	578	541	649
KLF6	1.66175	4.3638e-158	1.5025e-155	3882.47	6271	5287	6554	1831	2039	1670
AGR2	-1.39417	2.14849e-157	7.44021e-154	7254.08	2788	5200	3598	10799	11483	11683
TMEM64	-1.24774	2.24883e-152	6.48976e-149	24948.9	9873	18786	14208	35818	37766	39940
ACKR3	-1.6242	3.83521e-150	9.48666e-147	5146.2	1830	3250	2198	8189	8256	8644
ADCY1	-1.54109	8.64552e-146	1.87121e-142	4116.71	1450	2579	2038	5971	6843	7029
GEM	3.77257	3.09996e-138	1.00064e-135	755.218	1483	1344	1482	131	82	92
ASCL1	-2.44943	6.99964e-130	1.34665e-126	1120.19	261	407	323	1952	2052	2110
ELOVL2	-1.7818	1.98304e-129	3.43363e-126	2287.87	693	1275	1009	3588	3907	3968
PEG10	-2.12685	3.30213e-127	5.19785e-124	1355.56	346	662	457	2157	2484	2504
PCDH10	-3.15514	6.55217e-126	9.45424e-123	920.496	166	215	145	1732	1738	1869
BTG2	2.03104	1.51446e-121	4.04569e-119	1951.06	3242	2946	3420	780	864	636
RAB31	-1.38137	4.11604e-118	5.48225e-115	4724.74	1823	3184	2534	6512	7711	7905
PKP3	-2.53485	6.81016e-116	8.4227e-113	1090.74	233	372	313	2031	1908	2056
SFXN2	-1.35217	5.67718e-112	6.14377e-109	3396.85	1332	2432	1763	4842	5284	5677
ADAMTS19	-1.80187	2.36651e-107	2.27645e-104	2220.84	623	1299	965	3473	3631	4073
SCUBE2	-1.20218	2.45746e-102	2.12755e-99	6625.39	2745	5177	3714	9681	10016	10129
RAMP3	2.39546	1.43686e-98	2.96837e-96	1280.39	2026	2083	2481	443	356	412
RND1	2.79284	7.14591e-97	1.35023e-94	563.711	1023	975	1014	137	124	160
MXD1	1.57069	1.15712e-94	2.10922e-92	1183.31	1908	1716	1793	569	606	593
BCAS1	1.72401	1.261e-93	2.22021e-91	1754.09	2889	2589	2764	708	840	870
PER1	1.93423	1.27218e-91	2.16606e-89	1696.37	2931	2772	2501	675	716	696
SLC39A6	-0.959098	7.72335e-90	5.81434e-87	59660	26828	51106	39549	77128	86444	91589
CXCL12	-1.44326	1.52474e-86	1.05604e-83	2171.53	827	1453	1084	3189	3627	3449
ERBB4	1.61852	3.10948e-84	4.72337e-82	941.325	1479	1390	1475	463	446	462
NECAB1	-1.77701	6.53662e-77	3.65102e-74	1372.79	461	712	595	2106	2203	2569
CLSTN2	-1.83288	8.0217e-76	4.34049e-73	1179.79	356	656	483	1978	1867	2102
THBS1	-0.935892	5.07794e-75	2.66438e-72	14564.9	7002	11881	9797	19126	20848	21915
CA12	-0.979798	6.65356e-74	3.38842e-71	6951.05	3282	5660	4499	9454	9986	10371
BMF	1.69175	2.93506e-70	3.60919e-68	713.088	1198	984	1159	320	361	320
SERPINA3	-1.0998	1.11926e-69	5.38335e-67	4978.87	2208	4101	2866	7246	7140	7527
MAP3K8	2.49094	1.51394e-68	1.76368e-66	384.732	676	606	721	98	127	120
CYP24A1	3.61083	5.69117e-68	6.58052e-66	436.974	918	799	751	45	67	84
ABHD2	-0.881687	1.73168e-65	7.31317e-63	9394.76	4723	7925	6303	12374	13531	13456
AMIGO2	-0.961459	1.6987e-64	7.00311e-62	4637.06	2205	3887	2972	6121	6523	7186
PLK2	-0.818992	3.80275e-64	1.53127e-61	10579.2	5261	9477	7344	13697	14561	15411
ELP2	-0.821961	4.34612e-63	1.63594e-60	9806.47	4840	9204	6519	12092	14224	14266
ABCA12	-1.29348	7.61448e-63	2.80521e-60	2114.96	793	1574	1195	2918	3313	3506
H19	-1.53413	4.37868e-62	1.57952e-59	2032.69	689	1519	865	3003	3348	3436
S100A6	1.98695	2.78611e-61	2.84e-59	565.985	949	833	990	250	236	191
AGR3	-3.6255	4.14615e-61	1.46511e-58	270.799	28	43	45	489	594	537
WDR90	1.74964	8.15506e-59	7.99712e-57	1097.3	1733	1798	1625	471	496	524
PKP1	-1.13425	2.46448e-58	8.0514e-56	2433.2	1131	1889	1353	3290	3801	3724
PIM1	1.55193	9.99939e-58	9.50494e-56	1444.11	2297	1879	2442	753	811	619
COL12A1	-1.29132	7.456e-56	2.39075e-53	2367.2	921	1636	1395	3189	3948	3753
CRABP1	-1.12112	8.17316e-56	2.57306e-53	3598.49	1759	2786	1934	4960	5237	5747
COL1A1	2.20373	4.2176e-55	3.7556e-53	822.954	1543	1227	1377	228	354	291
SULF2	-0.629357	2.07929e-55	6.42909e-53	70112.3	39725	67320	51002	86565	93395	95354
MRC2	1.60364	1.85263e-54	1.64027e-52	871.474	1409	1232	1377	451	472	359
YPEL2	1.55269	4.19486e-53	3.63102e-51	1413.95	2097	2107	2245	672	847	619
SLC24A3	-0.99873	1.59089e-50	4.59106e-48	2502.78	1151	2141	1541	3372	3584	3837
GABRP	2.50417	8.49696e-50	6.78618e-48	323.02	531	507	647	86	93	108
PGR	-1.20533	7.35028e-50	2.0864e-47	1696.1	761	1215	957	2276	2667	2717
THSD4	-1.10485	8.47682e-50	2.36736e-47	2499.46	1048	1990	1556	3558	3622	3846
ANXA1	3.06633	1.887e-48	1.41928e-46	286.599	594	484	489	75	49	57
CALCR	-1.69589	2.46276e-48	6.56042e-46	953.435	277	599	439	1454	1458	1812
NPY1R	-1.29732	3.07624e-48	8.07047e-46	1941.26	810	1239	1143	2741	3047	3136
SMIM22	2.27149	3.20418e-47	2.28781e-45	319.292	609	494	517	106	110	109
TIMP3	-1.56604	8.87616e-48	2.29389e-45	872.141	309	515	438	1281	1483	1454
PAPSS2	1.63055	4.1043e-47	2.87747e-45	1053.2	1790	1527	1555	435	589	504
LNCAROD	2.04372	1.22343e-46	8.42482e-45	485.255	736	796	855	159	200	203
ITM2B	-0.821713	4.96408e-47	1.26402e-44	8522.62	4385	7770	5606	11677	11608	11828
TMEM164	-0.724488	2.83719e-46	7.018e-44	5934.44	3153	5537	4197	7429	8169	8314
PGM2L1	2.35527	1.17659e-45	7.85781e-44	413.907	722	701	692	164	121	116
MYOF	-0.855329	1.25265e-44	2.89195e-42	11378	5337	9805	8236	14784	16373	16229
IREB2	-0.735515	2.2507e-44	4.93302e-42	6242.34	3189	5838	4506	7719	8645	8882
NCL	-0.674591	5.63463e-44	1.21955e-41	39830.5	20929	37837	29767	46369	54443	58001
JARID2	-0.864617	8.2714e-44	1.76814e-41	4383.33	2241	3679	2974	5517	6493	6302
SLFN5	1.70732	3.8897e-43	2.48012e-41	428.761	721	621	668	208	192	196
TCIRG1	1.70267	3.99475e-43	2.53667e-41	536.325	936	716	868	250	277	222
PMAIP1	2.26419	8.4572e-43	5.3484e-41	363.254	644	618	573	107	124	140
CD44	2.01626	1.10043e-42	6.93092e-41	1352.05	2198	2074	2369	533	678	386
MIR23AHG	1.51344	1.1901e-42	7.43526e-41	1159.85	1833	1566	1871	656	651	481
COL4A5	-1.57189	3.79072e-43	8.00443e-41	919.413	302	539	490	1388	1562	1498
S1PR2	2.13158	2.52253e-42	1.55713e-40	416.194	735	589	758	143	136	179
TSPYL2	1.64598	9.85687e-42	5.96572e-40	904.809	1475	1391	1321	434	386	477
ESR1	-0.650359	4.56201e-41	9.40371e-39	10823.4	5819	10382	8082	12863	14968	14983
TRPS1	-0.81525	5.46853e-41	1.11397e-38	7420.59	3593	6508	5405	9214	10329	11112
MT-ND3	-0.559531	4.41606e-40	8.78898e-38	77826.4	44229	77633	59298	88250	103288	109077
OLFML3	1.90733	2.79875e-39	1.56548e-37	404.193	709	529	726	180	170	155
PODXL	-0.614291	3.10106e-38	5.83641e-36	11002.1	6068	10610	8338	13391	14658	14994
MTSS1	-1.18734	4.37711e-38	8.06273e-36	1191.45	540	916	635	1708	1797	1843
ISOC1	-0.653313	6.13467e-38	1.11812e-35	8096.72	4402	8277	5582	9985	10900	11133
SPOCK1	2.09163	4.50168e-37	2.36437e-35	261.006	438	424	430	102	94	98
NEAT1	1.53452	4.54344e-37	2.37824e-35	37997.7	64969	56906	50568	18857	19822	19173
LRRFIP1	-0.746117	1.50789e-37	2.63728e-35	4120.73	2103	3850	2941	5000	5772	5954
RB1	-0.964257	2.47738e-37	4.24712e-35	2679.43	1152	2354	1785	3537	3804	4132
FARSB	-0.852086	1.89379e-36	3.2148e-34	3815.81	1742	3515	2664	4923	5427	5543
ENTREP1	3.1475	8.10271e-36	3.97289e-34	639.683	1127	1230	1147	74	125	185
ISG20	1.60572	1.04478e-35	5.09053e-34	670.083	1059	953	1078	268	342	373
PAPSS2	-1.14001	3.05792e-36	5.14058e-34	1238.46	534	986	716	1793	1855	1853
HDLBP	-0.49336	4.49718e-36	7.48737e-34	42031.8	24583	44221	32013	47934	55836	55352
CLCF1	1.55501	2.58583e-35	1.22898e-33	514.965	775	757	819	268	292	217
IGF1R	-0.60182	1.30334e-35	2.14928e-33	12929.8	7570	12334	9480	15242	17418	17799
SULF1	1.89117	5.25527e-35	2.47493e-33	844.578	1352	1163	1575	365	437	266
PARP10	2.50056	7.84127e-35	3.67047e-33	227.765	381	347	461	79	67	57
FHL1	1.70762	1.42745e-34	6.58242e-33	542.393	776	829	936	224	301	231
PALM3	1.56545	2.17753e-34	9.95242e-33	380.8	573	558	611	193	206	172
KLHL24	1.59042	3.67002e-34	1.66755e-32	671.113	1222	854	1020	330	363	301
CAPN5	1.98796	5.0423e-34	2.28437e-32	436.32	716	711	701	153	157	210
TMTC1	-2.49089	1.81392e-34	2.85528e-32	243.935	59	81	69	432	459	444
STC2	-0.670241	7.35676e-34	1.13734e-31	4389.62	2416	4176	3153	5398	5824	6219
LINC01522	-1.45935	7.8925e-34	1.20937e-31	654.403	231	464	321	1002	1011	1090
IRS1	-0.568514	1.29402e-33	1.94834e-31	11434.3	6551	11404	8551	14023	15077	15028
TRIP12	-0.578412	2.49948e-33	3.66768e-31	11054.5	6226	10862	8427	12722	14972	15202
CPE	2.35895	9.31683e-33	4.02103e-31	575.365	979	934	1034	212	125	217
NRCAM	-0.658047	2.99412e-33	4.35656e-31	8658.74	4653	8033	6609	10719	11520	12037
RASSF8	-1.23907	4.67448e-33	6.63431e-31	1580.68	567	1227	957	2047	2384	2786
FREM2	-0.722622	5.02668e-33	7.07618e-31	6518.94	3353	5922	4882	8118	8600	9556
DGKA	1.65329	1.78234e-32	7.62863e-31	389.521	663	535	615	161	205	192
SCD	-0.464215	8.80073e-33	1.2094e-30	66939.8	39603	69707	52739	76555	87756	86860
GPR132	2.27194	4.2491e-32	1.78901e-30	314.519	621	447	533	85	133	103
IGFBP4	-0.653806	1.82847e-32	2.47343e-30	9344.54	5412	9140	6318	10911	13074	13033
HSH2D	3.04056	8.50805e-32	3.50595e-30	234.421	415	453	405	51	34	65
ZDHHC22	1.72954	9.05657e-32	3.71223e-30	337.704	528	462	604	153	174	138
TRIP6	-1.64481	1.14523e-31	1.49095e-29	661.616	272	369	265	895	1111	1248
FAM43A	1.55674	4.6504e-31	1.85227e-29	573.656	847	787	993	246	291	326
S100A14	-0.698003	1.5634e-31	2.02017e-29	5538.44	2812	5713	3811	6892	7542	7740
COX6C	-0.556058	3.22833e-31	4.11018e-29	25170	13546	27056	18812	29396	32951	34679
FANCI	-0.699318	4.17853e-31	5.24284e-29	8749.32	4330	8399	6623	10379	12313	12401
STC1	-1.28527	5.50549e-31	6.8581e-29	1059.6	449	673	628	1573	1671	1602
ETS2	1.71096	2.49069e-30	9.67187e-29	1727	2840	2559	2696	998	618	773
TFF3	-0.770859	1.57343e-30	1.91859e-28	6217.63	3406	6133	3761	7991	8569	8784
UNC119B	-0.740375	1.88681e-30	2.28463e-28	4001.14	1993	3964	2771	4721	5700	5816
CAPN9	2.16648	1.13494e-28	4.1279e-27	333.437	647	456	574	141	130	90
COL6A1	1.715	1.39419e-28	5.01198e-27	394.104	552	594	704	168	213	166
ARMT1	-0.663931	5.04208e-29	5.7817e-27	9643.43	4774	9657	7312	11759	12796	13724
RCN2	-0.637497	6.24603e-29	7.06863e-27	4203.5	2295	4116	3081	4931	5824	5821
HDGFL3	-0.628575	2.27168e-28	2.4895e-26	5389.76	2910	5491	3877	6536	6884	7773
ZNF778	-0.805731	2.34394e-28	2.55254e-26	3566.03	1884	2953	2556	4337	5219	5135
DDIT3	1.61961	9.82578e-28	3.3313e-26	376.664	582	600	551	175	178	195
HCK	-1.6074	7.97565e-28	8.52459e-26	410.589	137	252	197	629	651	720
PRKDC	-0.503548	9.11372e-28	9.6222e-26	23137.5	13418	23129	18444	26282	30497	31104
SEPTIN2	-0.483002	9.29139e-28	9.75032e-26	21403.3	12071	22512	17091	24612	27614	28550
MYO15B	1.53788	3.38064e-27	1.10974e-25	1274.25	2024	1947	1814	520	638	776
LINC01016	-2.3205	1.40309e-27	1.42909e-25	220.315	48	94	71	412	397	373
CALR	-0.44116	1.57521e-27	1.59501e-25	34510.6	20875	37640	26088	40011	43655	44881
KRT13	-3.62036	2.24784e-27	2.23686e-25	121.952	14	31	9	211	242	280
PCP4	-1.78957	3.35477e-27	3.30045e-25	335.841	102	200	136	505	541	644
ZC3H13	-0.635546	6.11895e-27	5.98586e-25	4438.47	2388	4353	3301	5286	5758	6452
NR4A3	12.5447	3.25793e-26	1.03652e-24	555.912	1045	1138	1214	0	0	0
H2BC5	-0.796182	1.16017e-26	1.09772e-24	1945.58	989	1866	1270	2401	2803	2794
HMGB1	-0.46575	2.07737e-26	1.94431e-24	45226.6	25520	49684	35280	51135	57961	60831
RET	-0.627074	2.71237e-26	2.49812e-24	6692.1	3958	6284	4775	8421	8858	8952
EPHA6	2.52721	9.05429e-26	2.82268e-24	162.77	313	220	322	46	53	44
H4C15	-0.757118	3.13929e-26	2.87603e-24	2268.66	1128	2185	1585	2796	3245	3190
NR2F2	-0.438426	3.81805e-26	3.46124e-24	18738.9	11380	19645	14740	21087	23738	25002
FOSL1	2.72657	1.28491e-25	3.95794e-24	161.01	310	282	262	42	33	50
BTBD1	-0.591047	5.79037e-26	5.22189e-24	4371.39	2422	4367	3279	5357	5780	5848
CUL3	-0.569205	6.74518e-26	6.05144e-24	5732.27	3108	6021	4284	6748	7491	7941
KPNA3	-0.67239	7.59365e-26	6.77753e-24	3773.96	1927	3710	2806	4447	5275	5309
LINC01291	2.17913	2.22103e-25	6.7875e-24	374.559	750	611	512	160	134	108
MIER3	12.3046	2.53948e-25	7.74541e-24	470.537	954	872	1060	0	0	0
ANP32E	-0.739655	9.27166e-26	8.23276e-24	3558.05	1773	3221	2692	4313	4854	5254
HMGB1P6	-0.635786	9.58527e-26	8.4678e-24	6085.39	3119	6189	4561	7024	8232	8761
SMIM5	1.85729	3.19922e-25	9.71935e-24	530.28	776	854	909	288	190	201
SEC11A	-0.57939	1.14478e-25	1.00111e-23	7402.32	4022	7889	5370	8467	10073	10209
NEO1	-0.620082	1.27919e-25	1.11302e-23	5382.15	2923	5088	4185	6501	7265	7329
BAG3	-0.497801	1.47908e-25	1.27414e-23	12537.7	7458	13422	9164	14927	16177	16349
SUSD4	-0.821716	1.57905e-25	1.35353e-23	1839.76	953	1726	1166	2261	2730	2620
DSP	-0.534842	2.13174e-25	1.7918e-23	27158.3	15287	26374	22029	31679	35908	36419
SNRPA1-DT	-1.29452	2.59272e-25	2.16874e-23	656.889	257	476	367	853	1135	1040
MUC5AC	12.1971	7.36953e-25	2.19584e-23	436.689	875	792	1014	0	0	0
RPL21	-0.540085	4.40849e-25	3.61767e-23	33392.1	18411	36652	24328	37245	45065	46007
NDUFA10	-0.500709	4.57728e-25	3.73847e-23	6696.17	3926	7062	5029	7716	8702	8984
SGCG	-2.15067	5.75412e-25	4.67759e-23	211.352	55	97	72	337	356	425
MGP	-1.06945	6.95479e-25	5.61047e-23	948.658	425	815	539	1271	1332	1561
PSMA4	-0.582726	1.10302e-24	8.80131e-23	12600	6461	13291	9706	14856	16805	17267
JPH3	1.5235	3.09855e-24	9.00729e-23	285.746	463	382	456	151	157	130
TRIB2	2.2041	3.7927e-24	1.08621e-22	182.678	297	321	297	60	62	71
NT5E	2.18445	4.352e-24	1.23725e-22	317.014	589	438	571	80	117	142
DUSP4	-0.688839	1.85813e-24	1.47585e-22	4163.88	2314	3747	3051	5139	5318	6175
ARMC9	-0.731626	2.04106e-24	1.61374e-22	2022.23	1065	1920	1404	2592	2751	2815
H2AC6	-0.762423	2.15927e-24	1.69944e-22	2390.11	1142	2375	1663	3019	3321	3395
SUCLA2	-0.903832	2.79592e-24	2.18069e-22	1662.93	740	1620	1043	2120	2404	2502
EPHA7	-1.92799	3.54377e-24	2.72713e-22	250.227	66	136	101	415	425	441
IDI2-AS1	1.77618	1.00124e-23	2.78513e-22	607.043	1036	977	853	218	353	246
MLEC	-0.50138	3.87896e-24	2.97187e-22	14259.3	8008	14543	11521	16573	18759	18744
MICAL1	1.75285	1.2185e-23	3.37737e-22	857.337	1559	1426	1038	396	439	331
PRC1	-0.484869	4.50912e-24	3.42436e-22	8764.78	5106	9241	6755	10301	11503	11253
ITGB6	2.32816	1.44553e-23	3.98523e-22	563.9	1106	565	1251	206	189	161
ALG11	-0.843143	1.08263e-23	8.08003e-22	1701.44	874	1555	1087	2028	2373	2691
MAP3K20	-0.760971	1.10301e-23	8.19682e-22	3570.19	1767	3106	2742	4442	4817	5279
SLC25A15	-0.554209	1.1398e-23	8.43403e-22	4866.26	2740	4932	3707	5760	6576	6392
GIGYF2	-0.566394	1.15189e-23	8.48722e-22	5389.92	3155	5255	4047	6133	7284	7430
ACSL3	-0.585544	1.16062e-23	8.51528e-22	6941.92	3639	6997	5464	8430	9150	9366
LINC01293	1.63524	4.89064e-23	1.30199e-21	543.99	942	834	736	210	302	275
PCDH7	-1.4895	2.72519e-23	1.97434e-21	452.814	172	269	237	729	723	698
LINC00052	-1.91678	3.06244e-23	2.20025e-21	293.505	76	177	109	426	465	620
GNAI1	-2.01787	3.08741e-23	2.20903e-21	288.933	106	110	101	476	502	515
MED4	-0.875304	5.62715e-23	3.96073e-21	2279.41	967	2175	1583	2930	3147	3483
RPL21P16	-0.527949	6.1746e-23	4.31102e-21	5354.28	2966	5662	4096	6281	6949	7239
IFI27	3.17511	1.81079e-22	4.67607e-21	221.1	331	271	634	47	48	36
H4C14	-0.733011	6.88075e-23	4.74662e-21	2216.06	1088	2187	1574	2822	3031	3098
NKAIN1	-1.5891	8.67711e-23	5.96207e-21	375.533	117	240	188	565	564	698
RNF32-AS1	1.68742	2.36599e-22	6.06932e-21	328.188	436	516	579	143	176	143
EFHD1	-0.615788	1.39578e-22	9.4776e-21	4763.87	2846	4671	3267	5620	6612	6425
NPHP3-ACAD11	-11.5649	1.80132e-22	1.21835e-20	580.391	0	0	1	1008	1443	1320
CKAP2	-0.770527	2.01924e-22	1.35516e-20	3570.21	1701	3140	2771	4460	4860	5254
CYP26B1	1.67205	6.2637e-22	1.56532e-20	435.446	802	595	635	180	192	244
NOP56	-0.519197	2.569e-22	1.71086e-20	6968.77	4064	7496	5033	8310	9133	9100
LAMB3	1.96112	7.32726e-22	1.82522e-20	331.319	571	515	526	130	102	168
DSCAM-AS1	-0.42882	2.78132e-22	1.84516e-20	26680.2	16287	27507	21455	29547	33965	35675
DBNDD2	-1.0903	3.19655e-22	2.09653e-20	993.683	496	824	506	1329	1402	1648
FOXC1	-1.09044	3.77954e-22	2.45104e-20	727.931	351	558	421	1008	1103	1088
INHBA	11.4031	1.05766e-21	2.61361e-20	251.965	465	515	560	0	0	0
C1orf226	-0.827795	4.94755e-22	3.18464e-20	2002.91	1131	1695	1277	2702	2743	2819
NUP210	-0.495236	5.62032e-22	3.59099e-20	12774.9	7697	12573	10054	15285	16473	16534
MORF4L1	-0.532775	6.42992e-22	4.09317e-20	15447	8112	16706	12062	17969	20398	20776
SYTL5	-1.1175	6.92015e-22	4.3891e-20	1222.83	440	1006	817	1568	1954	1911
FRAS1	11.2926	2.42555e-21	5.83769e-20	233.306	466	426	540	0	0	0
RAF1	-0.502588	9.31042e-22	5.88357e-20	12482.6	7149	13061	9648	15196	15042	17064
AGAP1	-0.524147	1.06035e-21	6.65217e-20	4206.98	2427	4301	3220	4889	5472	5704
EIF4E2	-0.573775	1.33149e-21	8.32299e-20	5187.81	2974	5324	3743	5750	6964	7425
FKBP4	-0.379072	1.72741e-21	1.06064e-19	47487.2	29535	53049	36689	53200	59531	61018
RNF150	-1.04682	1.79445e-21	1.09791e-19	764.12	353	637	450	1011	1205	1116
HOXA10	2.48359	4.92617e-21	1.16885e-19	147.107	232	244	288	45	35	52
KLF2	2.36424	5.62686e-21	1.32698e-19	263.159	398	466	481	114	83	57
TYRP1	-2.97798	2.33912e-21	1.42112e-19	133.365	21	50	18	222	322	223
H1-2	-0.787843	2.35429e-21	1.42534e-19	1796.51	946	1759	1118	2152	2534	2693
HYCC2	11.2897	7.72995e-21	1.80373e-19	232.938	560	502	355	0	0	0
CEACAM5	2.35493	1.07093e-20	2.48399e-19	421.854	956	710	485	114	160	136
SLC22A15	1.74987	1.11646e-20	2.58573e-19	290.975	451	454	466	127	167	103
BMP5	2.0595	1.44095e-20	3.32234e-19	190.326	315	316	306	64	66	88
LINC02732	2.86513	1.46125e-20	3.36412e-19	292.54	574	466	538	101	76	33
DCDC2	-0.590152	5.6544e-21	3.38775e-19	3168.75	1713	3264	2360	3886	4148	4280
NELL2	2.2231	1.99895e-20	4.55467e-19	224.975	401	281	462	94	64	77
VPS35	-0.498047	1.20031e-20	7.14203e-19	7353.74	4107	7765	5797	8443	9859	9571
PCDHA10	-1.53104	1.3027e-20	7.72472e-19	537.15	232	272	265	909	836	817
IQGAP1	-0.513095	1.31889e-20	7.79404e-19	13874.2	7933	13503	11353	15775	18395	18673
ZNF702P	-5.46719	1.64118e-20	9.66566e-19	71.6929	5	4	0	149	138	165
EAF1	-0.528809	4.88137e-20	2.78029e-18	4748.97	2636	4818	3774	5651	6112	6383
PLD1	10.8171	1.64908e-19	3.56358e-18	167.845	319	333	375	0	0	0
SP110	-1.38663	1.00839e-19	5.6874e-18	480.999	176	400	210	686	801	768
NOMO2	-0.429467	1.54112e-19	8.5254e-18	11004.5	6590	11895	8603	12866	14174	13778
ID4	-0.934405	1.58844e-19	8.75916e-18	880.772	424	777	549	1179	1322	1236
PTMA	-0.386587	1.63058e-19	8.96299e-18	102059	61571	113259	81166	111729	134068	128695
PLCXD3	-3.55932	1.7567e-19	9.59535e-18	97.2175	13	28	4	188	203	188
ELF1	-0.494617	1.78201e-19	9.70297e-18	8849.5	5172	8673	7205	10297	11402	11792
RNF6	-0.620747	1.9433e-19	1.04498e-17	2660.21	1423	2591	2038	3211	3443	3782
RPL7	-0.382678	2.22218e-19	1.19124e-17	35003.1	20867	39930	27491	39826	43699	44619
PARD6B	-0.439418	2.24413e-19	1.19929e-17	10003.2	5991	10656	7844	11023	12557	13747
CACNA1C	10.6637	5.99349e-19	1.25321e-17	150.906	335	286	303	0	0	0
MIR29B2CHG	10.6615	6.24014e-19	1.29952e-17	150.69	323	300	298	0	0	0
DEK	-0.453089	2.58928e-19	1.37526e-17	7526.77	4295	8057	6050	8542	9616	10011
CGGBP1	-0.566191	2.69946e-19	1.42939e-17	4461.23	2372	4492	3551	5179	5984	6087
ZNF146	-0.650346	2.79593e-19	1.47148e-17	3624.81	1778	3695	2764	4265	4869	5224
SEMA5A	10.6634	8.11637e-19	1.67005e-17	150.906	341	307	273	0	0	0
TMED10	-0.377185	3.35602e-19	1.75029e-17	18878.7	11281	21234	15109	21136	23780	24123
MAFF	2.27355	9.09312e-19	1.86855e-17	497.223	837	775	913	151	106	245
ZNF320	-0.924098	4.43999e-19	2.30175e-17	966.673	486	761	655	1261	1425	1406
DCLK1	-1.23387	4.59474e-19	2.3678e-17	727.457	262	503	488	1085	1046	1166
EFEMP1	-0.854528	5.00918e-19	2.57371e-17	999.668	490	887	678	1270	1466	1430
SOCS1	1.62146	1.30333e-18	2.65359e-17	228.291	330	312	416	109	106	117
HEXA	-0.487727	5.42204e-19	2.7694e-17	11094.7	6451	12132	8217	13489	14474	13857
VHL	-0.412056	5.93475e-19	3.0135e-17	11122.6	6678	12358	8608	12395	13868	14876
MAP3K1	-0.643559	6.25747e-19	3.15884e-17	3885.71	2122	3485	3063	4741	5011	5579
C6orf141	-0.831417	6.39532e-19	3.21904e-17	1913.17	1028	1505	1365	2590	2545	2768
PLCXD3	10.5652	1.65309e-18	3.32205e-17	140.899	329	240	297	0	0	0
STXBP4	10.5979	1.73949e-18	3.48663e-17	144.159	362	256	266	0	0	0
PARM1	-1.48894	6.95086e-19	3.48853e-17	333.809	132	199	168	532	534	519
GTF3A	-0.449853	7.34778e-19	3.67707e-17	10616.5	6176	11753	8128	12021	14117	13539
CA2	-0.753382	8.21893e-19	4.10118e-17	1500.21	774	1448	1015	1925	1935	2233
MAGED4B	2.09078	2.40284e-18	4.77303e-17	204.304	313	288	417	88	87	56
CDV3	-0.476916	1.14971e-18	5.67156e-17	23901.7	12893	26256	19168	26905	31530	31670
NOX5	10.4795	2.95934e-18	5.83359e-17	132.833	276	265	271	0	0	0
CDH18	1.89747	3.25672e-18	6.39539e-17	241.917	342	343	487	105	85	113
CCN5	1.51126	3.5735e-18	6.99089e-17	609.683	844	804	1126	378	257	302
NPR1	10.4501	3.72842e-18	7.26643e-17	130.128	261	250	286	0	0	0
TSPAN3	-0.582438	1.92378e-18	9.35681e-17	2511.54	1425	2584	1805	3039	3354	3346
SHFL	1.51431	4.95709e-18	9.60064e-17	259.483	454	350	374	123	133	143
SLC25A30	-0.785036	2.01188e-18	9.75788e-17	1957.59	891	1795	1492	2513	2693	2809
RUBCNL	10.7935	5.1058e-18	9.87632e-17	165.122	500	326	180	0	0	0
SLC7A2	-0.498621	2.4808e-18	1.1932e-16	21732.3	12011	21566	18307	25265	27938	29163
TMOD2	10.51	6.75584e-18	1.2987e-16	135.607	221	237	377	0	0	0
PARP4	-0.57374	3.46454e-18	1.65714e-16	2972.82	1606	2971	2329	3531	3968	4010
RTL5	10.3841	8.83231e-18	1.68948e-16	124.303	226	238	298	0	0	0
BRWD3	10.3615	9.80913e-18	1.86711e-16	122.388	226	243	280	0	0	0
RAMP3	-3.12599	5.07859e-18	2.40262e-16	87.3684	11	22	19	126	172	214
DUSP5	-0.688548	5.57739e-18	2.62425e-16	1707.22	948	1586	1216	2190	2220	2395
AEN	-0.528457	5.86736e-18	2.75321e-16	3262.26	1884	3422	2416	3901	4111	4452
NCAM2	-0.604012	6.10151e-18	2.85534e-16	2332.02	1282	2339	1728	2717	3034	3367
TPM1	-0.503054	7.52163e-18	3.50099e-16	4225.8	2429	4282	3357	4828	5417	5804
CCDC117	-0.485477	8.16843e-18	3.77164e-16	3985.05	2358	4105	3095	4544	5110	5400
HSPA5	-0.385931	9.77827e-18	4.47912e-16	27036	15754	30428	21925	31099	33756	34177
ANK3	-0.586349	9.87339e-18	4.51076e-16	3000.78	1600	3063	2295	3710	3772	4167
OASL	10.3124	2.74984e-17	5.08499e-16	118.223	255	173	303	0	0	0
DKK1	-0.406085	1.18713e-17	5.38091e-16	16166.9	9431	18432	12615	18198	20059	21409
ARL3	-0.601076	1.50656e-17	6.75807e-16	2522.64	1376	2683	1775	2989	3447	3410
KRT17	-2.50103	1.53936e-17	6.88735e-16	129.761	19	44	50	236	243	233
ZNF98	-4.27056	1.681e-17	7.4632e-16	66.0755	0	14	6	122	143	144
MRPL44	-0.645358	1.69552e-17	7.50843e-16	1810.51	981	1797	1305	2193	2530	2423
DOCK1	-0.656811	1.96145e-17	8.66391e-16	2372.92	1249	2195	1853	2799	3166	3445
KCNK6	-0.490154	2.03858e-17	8.98167e-16	4135.72	2493	4230	3158	4701	5260	5686
SLC27A6	-1.55447	2.57195e-17	1.12174e-15	295.116	86	197	156	432	453	544
GPER1	-0.860623	3.17617e-17	1.37488e-15	1378.85	789	1202	800	1858	1971	1907
LRP4	10.1119	8.3894e-17	1.48385e-15	102.954	197	211	221	0	0	0
SIN3A	-0.485655	4.6784e-17	2.01009e-15	5987.65	3498	5967	4855	6709	7927	7993
ELOVL5	-0.604902	4.91394e-17	2.10606e-15	2328.48	1293	2216	1796	2806	3171	3108
ATG16L1	-0.570133	4.96181e-17	2.12132e-15	2617.05	1411	2727	1979	3103	3358	3668
KRT17	1.65753	1.48576e-16	2.58946e-15	208.924	292	298	383	108	91	99
TRIM25	-0.443622	6.09257e-17	2.59834e-15	11448.7	6810	11873	9230	12605	15477	14657
ARNT2	-0.62767	6.49421e-17	2.75606e-15	1933.81	1075	1829	1459	2286	2565	2752
PPP1R7	-0.517712	8.79221e-17	3.7131e-15	4445.99	2491	4802	3333	5142	6103	5699
CD59	-0.478757	8.87801e-17	3.74021e-15	6096.47	3386	6642	4788	6867	8164	7964
CRYBG3	10.0194	2.19371e-16	3.76404e-15	96.5581	220	191	179	0	0	0
CSNK2A1	-0.425505	8.98907e-17	3.77781e-15	7050.31	4113	7601	5693	7957	9175	9028
COL6A3	9.98185	2.53514e-16	4.31642e-15	94.0533	187	174	216	0	0	0
EEF1A1	-0.335492	1.14981e-16	4.76541e-15	485950	296380	561808	389215	524964	611333	619819
SUGT1	-0.724813	1.15041e-16	4.76541e-15	1380.13	710	1384	933	1647	1868	2063
SEMA3C	-0.456098	1.23071e-16	5.06713e-15	10116.1	5662	10574	8435	11788	12652	13416
SIGLEC15	9.96871	3.01989e-16	5.11928e-15	93.2232	177	188	205	0	0	0
POMP	-0.43296	1.5437e-16	6.25976e-15	7339.71	4229	8272	5678	8270	9393	9647
PLXNA2	9.93384	3.89898e-16	6.58787e-15	90.9752	204	165	189	0	0	0
UBE2V2	-0.533529	1.74907e-16	7.07596e-15	2864.94	1577	2985	2222	3426	3681	3856
MAOA	10.0787	4.6683e-16	7.81109e-15	100.617	264	206	143	0	0	0
IQCN	1.55854	5.58313e-16	9.28166e-15	592.802	959	890	854	340	211	336
ECEL1	-4.04612	2.43655e-16	9.7886e-15	73.1823	0	18	8	153	112	183
UQCRB	-0.48783	2.81821e-16	1.12957e-14	10791.7	5767	12185	8368	12484	13580	14735
TENM3	-0.634073	2.84199e-16	1.13647e-14	1599.33	867	1575	1178	1951	2111	2232
ITGB5	-0.432878	2.89067e-16	1.15327e-14	7011.74	4432	7444	5260	8027	8927	9103
PDIA3	-0.373115	2.92876e-16	1.16578e-14	11696.5	7224	12944	9257	13419	14687	14562
INTS6	-0.740571	3.56514e-16	1.39661e-14	1959.37	905	1873	1498	2337	2657	2960
MGAT5	-0.427567	3.92442e-16	1.53044e-14	5878.33	3608	6220	4594	6461	7587	7798
SLIT2	9.90691	1.01933e-15	1.66073e-14	89.3502	175	211	156	0	0	0
HMGN2	-0.348105	4.56178e-16	1.77101e-14	41174.2	25180	46744	33023	43950	52468	53043
GHDC	9.89381	1.22096e-15	1.97882e-14	88.5423	178	209	150	0	0	0
MESD	-0.53734	5.27623e-16	2.0438e-14	3906.14	2104	3935	3177	4481	5152	5352
ZFAND6	-0.512831	5.42276e-16	2.09522e-14	3033.99	1791	3202	2227	3546	4037	3958
COCH	-0.703982	5.43317e-16	2.09522e-14	1354.96	684	1324	984	1622	1830	1992
GTF2F2	-0.67584	6.49529e-16	2.4937e-14	1657.84	888	1586	1207	2042	2084	2476
PLXND1	-0.414913	6.79167e-16	2.59026e-14	11251	7179	11799	8646	13219	14053	14265
GATA3	-0.312343	7.82456e-16	2.97763e-14	47108.7	30217	52002	38627	51531	56743	60673
LINC02984	9.80806	1.9425e-15	3.106e-14	83.4278	159	191	157	0	0	0
FAM227A	9.76601	2.05395e-15	3.28081e-14	81.0177	162	172	160	0	0	0
ODC1	-0.422496	8.7007e-16	3.28936e-14	5978.72	3498	6522	4775	6640	7775	7765
EVL	-0.405514	9.34574e-16	3.52552e-14	13738.3	8542	15184	10397	15432	16588	18684
UBE2F	-0.755155	1.02442e-15	3.83937e-14	1245.89	602	1270	842	1514	1717	1844
RAP2C	-0.42672	1.18255e-15	4.39397e-14	6443.95	3723	6961	5233	7121	8338	8485
ATP8A1	9.71272	2.89533e-15	4.56361e-14	78.0572	154	151	173	0	0	0
SAMD9	9.944	2.97758e-15	4.68372e-14	91.6661	225	216	114	0	0	0
TPT1	-0.339361	1.28208e-15	4.71322e-14	184540	110626	212199	150478	197673	232608	237685
BLM	-0.657344	1.3369e-15	4.89395e-14	1379.89	758	1316	1007	1684	1869	1910
STOX2	9.70438	3.16415e-15	4.96209e-14	77.6096	170	149	156	0	0	0
ZFHX2	9.77291	3.32243e-15	5.19453e-14	81.4041	193	170	133	0	0	0
PRICKLE1	9.69274	3.90777e-15	6.07292e-14	76.9999	164	158	148	0	0	0
RFC3	-0.561853	2.01854e-15	7.28148e-14	4219.39	2160	4636	3196	4890	5448	5971
ITGB8	9.71077	4.79169e-15	7.37996e-14	77.9759	133	173	169	0	0	0
CAPN12	9.79958	5.39255e-15	8.28069e-14	82.8508	210	103	201	0	0	0
TP53INP2	1.64299	5.38966e-15	8.28069e-14	356.441	549	577	520	178	218	119
CRABP2	-0.433549	2.46121e-15	8.80827e-14	9321.69	5827	10303	6769	10662	11984	12007
RPL36A	-0.384282	2.49767e-15	8.89859e-14	36524.1	21139	40866	30046	39307	45682	49121
SLC30A1	-0.596885	2.53732e-15	9.02131e-14	2374.76	1405	2308	1703	2960	2929	3349
PRG4	9.63032	6.21126e-15	9.49086e-14	73.7292	147	146	158	0	0	0
TNFAIP3	9.87449	7.31136e-15	1.11498e-13	87.273	262	97	183	0	0	0
AHNAK2	-0.951841	3.18323e-15	1.12485e-13	704.065	356	534	473	949	1035	1012
AREG	-0.363242	3.32513e-15	1.17022e-13	10019.4	6038	11125	8189	11442	12211	12806
NRIP1	-0.558968	3.31904e-15	1.17022e-13	11183.6	5723	10989	9471	12881	14431	15868
KAT6B	-0.595119	3.33367e-15	1.17084e-13	2762.27	1470	2643	2226	3373	3509	3870
MIRLET7IHG	9.60395	7.7961e-15	1.18541e-13	72.3798	156	132	156	0	0	0
TNFRSF19	9.59711	8.31741e-15	1.26096e-13	72.0365	153	131	158	0	0	0
HSP90AB1	-0.300296	3.60826e-15	1.26472e-13	98702.1	60743	114000	81702	107349	121743	123508
ZMPSTE24	-0.503201	3.68504e-15	1.28902e-13	4127.18	2263	4243	3372	4892	5377	5382
KIT	9.59316	8.93973e-15	1.34739e-13	71.8372	147	130	164	0	0	0
GRIK2	9.72694	1.22772e-14	1.82731e-13	78.8118	233	121	131	0	0	0
MAVS	-0.388469	5.55557e-15	1.90863e-13	16162.5	10417	16834	12771	17728	20831	20779
TFPI	1.55443	1.30659e-14	1.9391e-13	217.523	363	310	320	102	96	129
ARL8B	-0.435643	5.76065e-15	1.97126e-13	6581.9	3741	7188	5312	7370	8153	9002
MID1	9.64186	1.61749e-14	2.3744e-13	74.2983	207	118	132	0	0	0
CILP2	9.5472	1.68482e-14	2.46735e-13	69.6088	126	146	153	0	0	0
ARIH1	-0.451535	7.31136e-15	2.47742e-13	4344.01	2512	4625	3474	4791	5669	5805
ARHGAP42	9.51876	1.7182e-14	2.51386e-13	68.2363	140	130	148	0	0	0
EIF4A1	-0.312548	8.22005e-15	2.76907e-13	70910.8	44579	81954	56612	78100	88385	87674
CALM2	-0.358074	8.42933e-15	2.83406e-13	34798.8	20239	40186	28438	38850	43129	44543
NUDT15	-0.745988	9.15951e-15	3.06764e-13	1886.88	834	1901	1409	2270	2732	2663
PFDN5	-0.486617	9.82094e-15	3.28281e-13	9885.39	5577	9645	8412	11200	12800	13367
ADAMTS7	9.53712	2.31373e-14	3.36926e-13	69.0841	136	112	178	0	0	0
SSR1	-0.40755	1.17759e-14	3.92116e-13	6688.38	4077	7268	5246	7445	8824	8416
CSPG4	9.52038	3.30173e-14	4.73676e-13	68.345	119	161	135	0	0	0
COPS8	-0.623782	1.53907e-14	5.08569e-13	2197.48	1115	2202	1709	2494	3096	3056
COL3A1	9.44163	3.68119e-14	5.27138e-13	64.6755	134	117	146	0	0	0
GPRASP1	9.52098	4.72279e-14	6.7133e-13	68.3049	137	97	189	0	0	0
TPPP3	4.52183	5.31204e-14	7.53707e-13	115.974	249	237	191	12	17	0
HMGCLL1	2.07851	5.34534e-14	7.57737e-13	243.273	437	393	372	95	129	54
E2F6	-0.492224	2.3279e-14	7.6052e-13	3699.75	2010	4002	2937	4241	4718	5053
EBPL	-0.552149	2.33873e-14	7.62619e-13	2576.35	1460	2737	1861	3232	3188	3475
DOCK3	9.40322	5.39155e-14	7.6359e-13	62.9931	132	126	127	0	0	0
SLC16A14	-0.847724	2.40366e-14	7.82318e-13	718.598	349	658	480	960	983	1043
C11orf96	9.40617	5.60517e-14	7.93119e-13	63.1194	141	123	122	0	0	0
ADAMTS9	-1.58341	2.72359e-14	8.83125e-13	263.799	92	127	153	413	449	413
CDH18	-1.53627	3.22147e-14	1.0368e-12	219.893	85	155	87	323	353	383
DDAH1	-0.638082	3.45613e-14	1.1077e-12	1470.52	820	1397	1088	1681	2008	2116
GRB10	-0.8627	3.75656e-14	1.19568e-12	732.284	371	700	438	969	1034	1052
L3MBTL3	9.35957	8.82776e-14	1.23001e-12	61.1211	119	128	126	0	0	0
PCDH19	-1.46229	3.98468e-14	1.26364e-12	318.656	133	165	177	414	589	512
MEST	-0.423418	4.4771e-14	1.4172e-12	6673.43	3877	7389	5280	7174	8768	8855
ZNF22	-1.08071	4.49354e-14	1.41981e-12	470.969	202	421	262	581	729	769
ENO1	-0.34163	4.63627e-14	1.46224e-12	113273	71987	130663	86495	125194	142586	141953
SLC4A10	-0.949238	5.13736e-14	1.61148e-12	653.148	308	557	422	757	954	1088
PRKG1	9.37002	1.33501e-13	1.837e-12	61.5692	144	130	101	0	0	0
WDR72	9.34428	1.35191e-13	1.85696e-12	60.4673	103	122	145	0	0	0
RPRD1A	-0.417206	6.10415e-14	1.90782e-12	4679.97	2748	4977	3843	5325	5929	6064
SNAI2	9.30371	1.39948e-13	1.9189e-12	58.7874	131	111	118	0	0	0
RHBDD1	-0.70289	6.21049e-14	1.93408e-12	1106.43	603	1026	790	1367	1433	1636
NAIP	9.30921	1.45892e-13	1.99334e-12	59.0261	116	125	119	0	0	0
TMEM26	-1.90278	6.45245e-14	2.00582e-12	143.86	35	87	57	239	259	236
RGS2	9.31625	1.53303e-13	2.08908e-12	59.2827	118	100	147	0	0	0
CYP2U1	9.351	1.58039e-13	2.14794e-12	60.7278	158	95	121	0	0	0
RPS6KA6	-4.21988	7.83738e-14	2.42329e-12	48.3413	3	4	7	67	108	125
PTDSS1	-0.366701	8.08412e-14	2.49092e-12	8411.84	5114	9418	6732	9603	10626	10402
PRICKLE2-AS1	-0.641121	8.08489e-14	2.49092e-12	2353.31	1160	2367.5	1830.5	2611	3244	3462.5
ADAMTS19-AS1	-1.26928	8.18266e-14	2.51657e-12	304.202	135	213	162	404	458	532
H2AC11	-0.858105	8.22158e-14	2.52405e-12	711.822	361	678	430	948	979	1039
NEK9	9.87794	1.93127e-13	2.59749e-12	87.4812	262	48	240	0	0	0
CD276	-0.407026	8.66403e-14	2.64581e-12	7319.71	4665	7895	5526	8563	8955	9451
SDCBP	-0.51891	8.98744e-14	2.73975e-12	2366.13	1327	2401	1884	2810	3071	3133
SMIM10L2A	9.28783	2.09997e-13	2.81949e-12	58.1345	143	100	114	0	0	0
PLXNA4	-0.865221	9.27239e-14	2.82164e-12	651.871	331	558	437	872	907	939
UFM1	-0.51402	9.56797e-14	2.90648e-12	3370.93	1798	3661	2639	4050	4424	4347
KPNB1	-0.336866	9.83022e-14	2.98092e-12	23049.9	13813	25816	19356	24691	28774	29913
KIAA0319	9.25473	2.51735e-13	3.34797e-12	56.8246	133	106	109	0	0	0
SHCBP1	-0.688901	1.12673e-13	3.41072e-12	1801.47	889	1944	1223	2039	2573	2611
ABCA3	-0.458389	1.26372e-13	3.81207e-12	4757.51	2998	4923	3562	5686	5776	6331
PLEKHG1	9.37258	3.14491e-13	4.15761e-12	61.7016	107	165	100	0	0	0
JAK1	-0.380398	1.41327e-13	4.23371e-12	13232	7772	14396	11083	14687	17268	16480
MYO6	-0.401413	1.44004e-13	4.29901e-12	8821.53	5060	9492	7449	9779	11113	11632
CDH1	-0.30528	1.53223e-13	4.56636e-12	56850.6	35562	62267	48526	63608	69296	70276
DIO2	9.22871	3.67202e-13	4.83796e-12	55.7886	124	88	132	0	0	0
HIP1	-0.414524	1.73174e-13	5.11692e-12	4425.92	2617	4782	3567	4862	5634	5893
SCAND2P	-0.673211	1.74569e-13	5.14933e-12	2498.62	1412	2700	1501	2910	3428	3622
H3C10	-0.819118	1.75669e-13	5.17298e-12	895.59	443	886	561	1244	1190	1255
KIF9-AS1	9.2967	4.60078e-13	6.00544e-12	58.4807	165	83	113	0	0	0
ORC6	-0.718234	2.1457e-13	6.28642e-12	1120.67	592	990	845	1443	1529	1529
DPY19L2P1	-2.35359	2.26117e-13	6.61355e-12	93.0438	17	40	32	169	152	182
HSPA8	-0.304758	2.4998e-13	7.26241e-12	97841.2	59540	114062	80682	104917	122184	123108
SLC7A1	-0.345556	2.53039e-13	7.33898e-12	12525.5	7754	13373	10576	13982	15632	15731
EEF1A1P5	-0.325912	2.55648e-13	7.40225e-12	29228.7	17896	34267	23230	31582	36172	37572
RADIL	9.20832	5.93831e-13	7.66735e-12	55.0167	144	92	102	0	0	0
ZNF716	-6.03254	3.11259e-13	8.93772e-12	48.567	4	0	0	84	99	127
MAST4	-0.601205	3.65687e-13	1.04314e-11	1515.52	882	1428	1134	1800	2060	2048
SGK1	-0.948753	3.79603e-13	1.08106e-11	530.424	243	471	337	750	734	772
ADRB1	1.62881	9.42346e-13	1.1958e-11	263.88	425	371	426	162	91	128
ZNF551	-1.62443	4.45551e-13	1.26471e-11	434.872	173	347	108	728	722	665
PLEKHG6	2.17218	1.08652e-12	1.36755e-11	218.002	343	387	357	118	55	61
HIGD1A	-0.425443	5.17462e-13	1.46403e-11	4093.66	2342	4504	3297	4635	5111	5452
ZXDA	9.13474	1.21848e-12	1.5262e-11	52.2666	106	79	138	0	0	0
PTPRG	-0.504941	5.85431e-13	1.64825e-11	2220.23	1275	2353	1684	2583	2774	3078
SKA3	-0.483717	6.88601e-13	1.92309e-11	2509.06	1413	2706	1953	2872	3194	3412
JAZF1	9.0573	1.60572e-12	2.00153e-11	49.5616	112	97	94	0	0	0
CARNS1	9.09855	1.71624e-12	2.13414e-11	50.988	134	87	92	0	0	0
GSN-AS1	9.04393	2.04937e-12	2.52408e-11	49.1153	97	108	94	0	0	0
MAFB	-0.704816	9.23414e-13	2.55822e-11	986.77	570	906	669	1220	1371	1362
AKR1C2	-0.439629	9.30769e-13	2.57448e-11	2970.5	1779	3185	2313	3401	3842	3820
ARHGAP36	-2.6154	9.72313e-13	2.67657e-11	93.5539	17	18	38	154	187	179
LIMCH1	9.18452	2.23819e-12	2.73922e-11	54.1619	93	149	84	0	0	0
SLC2A12	9.00443	2.45167e-12	2.98869e-11	47.7701	94	89	110	0	0	0
CHSY1	-0.59481	1.21376e-12	3.30964e-11	1643.82	921	1595	1250	1982	2031	2389
H4C9	-0.557515	1.27501e-12	3.46576e-11	1768.44	1051	1819	1252	2012	2402	2408
ZNF674	9.0226	3.12004e-12	3.77082e-11	48.3812	121	91	84	0	0	0
CEP112	9.01348	3.17177e-12	3.82737e-11	48.0606	120	76	100	0	0	0
ANKRD36C	8.98185	3.40105e-12	4.09766e-11	47.0231	111	80	98	0	0	0
RSL1D1	-0.373933	1.53047e-12	4.14064e-11	11202.7	6475	12382	9445	12130	14087	14772
DGCR5	8.98574	3.50973e-12	4.21875e-11	47.1663	84	99	105	0	0	0
RAB30	-0.57278	1.59687e-12	4.30683e-11	2703.64	1395	2673	2227	3040	3720	3726
HMG20A	-0.602885	1.72709e-12	4.62919e-11	1785.37	938	1751	1410	2013	2527	2442
MC4R	8.9666	3.88507e-12	4.65547e-11	46.5281	109	79	98	0	0	0
ZDHHC11B	9.004	4.0331e-12	4.81795e-11	47.7804	86	113	91	0	0	0
FAM171A1	8.92952	4.75441e-12	5.64049e-11	45.3546	94	85	99	0	0	0
OTUD6B	-0.599103	2.16651e-12	5.72718e-11	1615.35	825	1628	1278	1950	2134	2215
HNRNPA3	-0.313769	2.28464e-12	6.02108e-11	26826.4	16185	30578	22581	28605	33644	34079
ARL6	8.95441	5.20988e-12	6.14908e-11	46.1515	79	96	107	0	0	0
UGT2B15	8.98368	5.36779e-12	6.31979e-11	47.1111	79	112	95	0	0	0
CDC25B	-0.313081	2.4803e-12	6.52681e-11	12418.9	8004	13975	9931	13667	15401	15452
EGR4	8.96943	5.78582e-12	6.78105e-11	46.6091	93	71	124	0	0	0
TFF1	-0.333199	2.63577e-12	6.9149e-11	111419	71300	130043	84213	123872	137426	140617
FAM83B	-0.445328	2.7596e-12	7.21789e-11	5929.22	3229	6490	4903	6650	7379	8130
SHC4	-1.26986	2.84206e-12	7.40005e-11	269.793	100	190	167	380	409	446
NIBAN1	-1.91573	2.8415e-12	7.40005e-11	136.396	33	93	45	240	214	243
VPS36	-0.618783	2.85922e-12	7.43353e-11	1518.11	831	1443	1169	1681	2092	2195
THUMPD3	-0.43901	2.93223e-12	7.61192e-11	4674.66	2657	5197	3690	5065	5904	6490
DIAPH3	-0.715055	2.97985e-12	7.72398e-11	1127.23	529	1114	849	1330	1542	1675
NPTN	-0.447592	2.98882e-12	7.73564e-11	3852.43	2140	4364	3012	4367	4954	5078
FNDC3A	-0.674057	3.16533e-12	8.1559e-11	1859.36	921	1691	1518	2256	2360	2790
CBX6	-0.370655	3.58979e-12	9.15422e-11	6441.55	4148	7025	4972	7275	8094	8122
SELENOP	8.89851	8.12413e-12	9.34486e-11	44.3999	79	94	98	0	0	0
MUC5B	-0.706035	3.74025e-12	9.52388e-11	1212.8	717	1014	874	1501	1617	1742
OXTR	1.76664	9.04902e-12	1.03702e-10	194.162	378	268	274	107	92	63
EPHX1	-0.507659	4.11507e-12	1.04323e-10	2793.71	1749	2926	1953	3338	3485	3781
MCM4	-0.307673	4.52828e-12	1.1463e-10	16166.6	10078	18178	13463	17246	20460	20218
DPY19L2P1	9.11889	1.08347e-11	1.22714e-10	51.684	125	48	150	0	0	0
ZMAT2	-0.414969	4.98621e-12	1.25125e-10	5904.5	3575	6084	4868	6285	7654	7947
GCA	-0.577474	5.33685e-12	1.3373e-10	1419.97	804	1475	1019	1612	1922	1979
EMC3	-0.377669	5.89077e-12	1.46339e-10	5083.76	3113	5717	3968	5859	6351	6362
FAT1	-0.502757	6.0121e-12	1.48926e-10	3191.97	1900	3065	2578	3814	4268	4005
ANKRD24	8.85467	1.35987e-11	1.52459e-10	43.0777	88	96	78	0	0	0
ZNF264	-2.33985	6.35531e-12	1.56979e-10	94.4486	19	27	42	147	182	182
RIPPLY3	-1.03809	6.50135e-12	1.60357e-10	450.622	187	398	278	655	698	602
FARP2	-0.422459	6.65466e-12	1.6344e-10	3114.22	1868	3283	2513	3589	3960	3985
DNAAF1	1.57094	2.63866e-11	2.88317e-10	407.311	695	641	521	133	232	244
KCND1	8.8375	2.64105e-11	2.88375e-10	42.5731	91	101	66	0	0	0
MARK1	8.73919	3.11262e-11	3.37487e-10	39.7546	85	79	79	0	0	0
PLAT	8.7528	3.34244e-11	3.60891e-10	40.1172	78	68	101	0	0	0
HEYL	8.7577	4.68527e-11	4.99956e-10	40.2681	103	78	65	0	0	0
ZNF365	8.822	5.40712e-11	5.71083e-10	42.0983	55	85	118	0	0	0
PPP1R18	8.68029	5.61982e-11	5.9113e-10	38.1663	76	79	78	0	0	0
IGSF1	2.35795	5.83189e-11	6.12605e-10	1116.22	2281	1187	2325	302	289	485
NCALD	8.59776	1.27862e-10	1.2881e-09	36.0362	84	65	72	0	0	0
LINC03048	8.75226	1.35953e-10	1.36517e-09	40.1285	100	94	49	0	0	0
ZNF284	8.61644	1.39355e-10	1.39842e-09	36.5207	65	84	73	0	0	0
DTX1	8.7332	1.41078e-10	1.41479e-09	39.589	49	85	108	0	0	0
MME	8.71481	1.61676e-10	1.61094e-09	39.0797	119	63	58	0	0	0
ATP6V1FNB	8.59284	1.92314e-10	1.90154e-09	35.9231	86	74	59	0	0	0
FAHD2B	8.56693	2.01497e-10	1.986e-09	35.2774	61	70	85	0	0	0
CCDC68	8.5604	2.20628e-10	2.16492e-09	35.1182	60	70	85	0	0	0
DLL4	8.55284	2.38973e-10	2.33311e-09	34.9259	65	60	90	0	0	0
CRISP3	8.58108	2.39203e-10	2.33389e-09	35.6254	93	66	59	0	0	0
CGA	8.49446	3.23611e-10	3.12596e-09	33.5523	68	68	69	0	0	0
CYP2W1	8.49887	3.52075e-10	3.38823e-09	33.6443	66	58	83	0	0	0
HGFAC	8.69965	3.88509e-10	3.72037e-09	38.6914	101	92	41	0	0	0
ERVE-1	8.49627	4.04931e-10	3.86838e-09	33.5809	66	55	86	0	0	0
TATDN2P3	8.57363	4.4863e-10	4.26118e-09	35.4408	102	63	52	0	0	0
NDRG4	1.7086	4.48834e-10	4.26118e-09	154.546	286	208	232	67	56	91
BBS12	8.46432	5.56213e-10	5.22935e-09	32.864	58	74	68	0	0	0
TMC8	8.44191	5.68568e-10	5.33902e-09	32.3496	60	64	74	0	0	0
ALDH1A3-AS1	8.47721	6.49511e-10	6.04416e-09	33.1567	81	69	52	0	0	0
PTHLH	8.4277	7.36155e-10	6.81768e-09	32.0252	60	56	81	0	0	0
HERC6	9.46134	7.38285e-10	6.83141e-09	65.5525	294	12	107	0	0	0
AMPD3	8.40566	7.93158e-10	7.3063e-09	31.5396	66	54	74	0	0	0
ARX	8.3943	8.20196e-10	7.53296e-09	31.2959	67	57	68	0	0	0
SLC6A16	8.39388	8.45827e-10	7.75e-09	31.2862	70	56	66	0	0	0
VWA5B2	8.38856	9.23834e-10	8.41993e-09	31.1735	59	60	72	0	0	0
WNT10B	8.37132	1.19508e-09	1.0778e-08	30.8087	69	63	56	0	0	0
CASP9	1.74264	1.19491e-09	1.0778e-08	230.336	350	334	403	74	85	154
SPIN2A	8.40296	1.20692e-09	1.08721e-08	31.5	56	76	59	0	0	0
CD36	8.35116	2.14299e-09	1.88871e-08	30.3698	50	53	84	0	0	0
PPARG	2.09936	2.21618e-09	1.94657e-08	217.035	368	283	434	37	118	90
SHC2	1.89388	2.44269e-09	2.13584e-08	122.514	200	203	186	44	74	37
ADAM2	8.51818	2.64827e-09	2.31038e-08	34.1042	33	71	105	0	0	0
LINC-PINT	8.62194	3.12704e-09	2.70975e-08	36.676	36	126	56	0	0	0
DMP1	8.41359	3.26654e-09	2.82589e-08	31.7387	41	90	60	0	0	0
KTN1-AS1	8.26174	3.70793e-09	3.18639e-08	28.557	49	63	62	0	0	0
LINC02015	8.20737	5.11005e-09	4.31943e-08	27.4974	60	55	53	0	0	0
DUSP15	8.26882	5.80727e-09	4.8901e-08	28.6895	41	56	79	0	0	0
HSPA6	8.17636	7.08268e-09	5.89995e-08	26.9087	50	51	64	0	0	0
FOXD3	8.27661	7.48627e-09	6.20943e-08	28.8569	37	72	66	0	0	0
CLGN	8.16458	8.63683e-09	7.09539e-08	26.6874	66	45	53	0	0	0
OLA1P3	8.22622	1.04879e-08	8.55261e-08	27.8474	83	38	51	0	0	0
LYPLAL1	1.9301	1.09551e-08	8.9148e-08	292.354	439	462	516	61	201	102
ANKRD37	8.23358	1.17842e-08	9.55938e-08	28.0012	81	53	37	0	0	0
BDH2	1.67881	1.18503e-08	9.60711e-08	127.517	219	168	210	80	55	45
PDE6B-AS1	8.12687	1.87012e-08	1.48061e-07	25.9914	50	37	74	0	0	0
HMOX1	1.62037	2.21303e-08	1.74054e-07	231.816	358	377	331	105	166	69
NR4A1AS	1.70311	2.36297e-08	1.85283e-07	493.772	1285	510	535	251	241	197
TBC1D3P1-DHX40P1	8.25381	3.77842e-08	2.88388e-07	28.3837	105	30	41	0	0	0
C8orf88	1.50018	4.01214e-08	3.05625e-07	112.853	167	181	160	50	66	59
DEPP1	7.9919	4.3229e-08	3.27846e-07	23.6739	48	38	60	0	0	0
TCAF2P1	7.97436	4.67896e-08	3.54503e-07	23.3961	42	48	53	0	0	0
MIPOL1	8.48884	5.52585e-08	4.15216e-07	33.3969	93	12	106	0	0	0
LINC01341	7.9938	6.14472e-08	4.59712e-07	23.7004	53	31	63	0	0	0
BPIFB1	7.97531	6.73975e-08	5.02046e-07	23.3993	50	32	63	0	0	0
CYP1B1-AS1	1.95185	9.55266e-08	6.95858e-07	101.974	228	108	165	42	35	47
ANKRD1	7.8859	1.02561e-07	7.44994e-07	22.0012	41	41	53	0	0	0
TCIM	7.87476	1.42722e-07	1.02435e-06	21.8378	52	46	35	0	0	0
FERMT3	7.84022	1.46852e-07	1.05242e-06	21.3141	46	37	48	0	0	0
NCF2	7.83026	1.89601e-07	1.34018e-06	21.168	54	36	40	0	0	0
LINGO3	7.82328	2.04843e-07	1.44135e-06	21.0748	39	49	40	0	0	0
HSPD1P11	7.9401	2.43095e-07	1.69054e-06	22.8501	23	55	61	0	0	0
LINC02175	7.94415	2.45829e-07	1.70725e-06	22.9053	78	33	30	0	0	0
CEACAM19	8.0331	2.75576e-07	1.89347e-06	24.3533	87	19	46	0	0	0
MEF2B	7.86233	3.41096e-07	2.2978e-06	21.6602	39	62	29	0	0	0
XKR6	7.77436	4.24039e-07	2.81856e-06	20.364	58	34	33	0	0	0
TRIM29	1.5303	4.60114e-07	3.04268e-06	223.957	354	367	291	168	93	80
ZNF404	7.77288	5.97437e-07	3.87148e-06	20.3539	26	54	43	0	0	0
CREG2	2.79657	7.34228e-07	4.70476e-06	77.819	205	49	172	24	16	18
LINC01220	7.80101	9.07761e-07	5.7431e-06	20.7355	70	20	39	0	0	0
MFAP2	1.9204	2.87304e-06	1.67981e-05	147.242	219	184	316	102	42	38
LINC02997	1.81101	4.26345e-06	2.43217e-05	148.387	251	182	279	41	46	107
TNFRSF10C	1.99846	4.9722e-06	2.80143e-05	70.8519	101	134	109	40	24	20
AHI1	1.78754	5.66972e-06	3.16793e-05	298.649	534	449	433	238	96	63
TPK1	1.939	6.41614e-06	3.55295e-05	89.3088	140	106	192	49	42	19
C15orf48	1.71929	9.28415e-06	5.0139e-05	65.8861	119	75	118	32	28	31
MAP2	3.18402	1.04586e-05	5.60517e-05	382.257	728	657	724	31	162	36
GPR87	1.63729	1.09527e-05	5.86591e-05	186.71	155	349	354	119	78	72
RNU6-813P	1.50458	1.28999e-05	6.81455e-05	71.7584	122	99	104	32	40	39
ZNF461	2.42399	1.8837e-05	9.69638e-05	88.759	184	126	150	12	57	15
F8	1.62113	2.19064e-05	0.000111651	65.2104	91	84	128	33	33	29

## Sheet: SMARCA1_ATACseq
Seqnames	Start	End	Width	log2 fold-change	p value	SMARCA1_mean	AAVS1_mean
chr14	104740640	104742305	1666	2.12701	0.000279469	2.05975	0.471543
chr16	88073844	88074642	799	5.56717	0.000446878	0.936252	0.0197473
chr10	133218970	133220611	1642	3.57653	0.00055677	0.749001	0.0627828
chr16	68373584	68374904	1321	2.78637	0.000657155	1.68525	0.244278
chr9	133582960	133584092	1133	2.4163	0.000718275	4.49401	0.84189
chr1	202618127	202618947	821	3.08508	0.000825312	1.68525	0.198593
chr20	51670458	51671852	1395	2.35401	0.000950719	2.62151	0.512769
chr1	106803727	106804347	621	3.02056	0.000965505	2.62151	0.323051
chr6	44276408	44277555	1148	3.10756	0.000966879	2.43425	0.282421
chr14	70233447	70235112	1666	2.96608	0.00100534	3.74501	0.479264
chr14	72605042	72605840	799	5.54926	0.00112248	2.05975	0.0439866
chr14	24084416	24085002	587	5.3649	0.00117134	2.247	0.0545266
chrX	142207295	142208551	1257	5.44567	0.00118688	2.43425	0.0558543
chr1	109667849	109669642	1794	2.09317	0.00121881	4.86851	1.14101
chr14	74347371	74348240	870	4.68827	0.00122936	5.61751	0.217888
chr1	24714771	24715724	954	5.33556	0.00125096	7.86452	0.194764
chr9	120375859	120377051	1193	3.88548	0.00126056	2.05975	0.13937
chr8	88242492	88243334	843	5.44639	0.00126513	1.8725	0.0429434
chr7	97016225	97017961	1737	2.99723	0.00142251	0.936252	0.117257
chr14	100560905	100561448	544	5.25313	0.0015619	0.749001	0.0196396
chr22	31125763	31126521	759	5.27893	0.00157227	1.8725	0.0482289
chr12	125311953	125313365	1413	5.37437	0.00159632	15.537	0.374558
chr3	11750791	11752479	1689	2.52868	0.00164531	1.31075	0.22715
chr7	102200855	102202222	1368	2.30887	0.00165015	1.31075	0.264534
chr9	138045974	138047206	1233	2.32056	0.00165393	4590.62	918.993
chr17	58583023	58583311	289	2.22426	0.00192714	2.247	0.480878
chr12	3116861	3118122	1262	4.83476	0.00202019	0.749001	0.0262468
chr7	158739988	158740595	608	2.33849	0.00208148	1.498	0.296181
chr12	108209182	108210431	1250	4.9915	0.00213003	3.17844	0.0999134
chr3	184677111	184678887	1777	2.2204	0.00215567	2.80876	0.602708
chr22	29753473	29754795	1323	3.71751	0.00220269	0.18725	0.0142345
chr14	101044348	101045221	874	4.39349	0.00225921	1.30113	0.0619083
chr5	181052586	181054135	1550	2.42993	0.00228079	0.369688	0.0686044
chr6	3317830	3319565	1736	2.39506	0.00229131	0.556938	0.105882
chr3	63531214	63532717	1504	2.36923	0.00243569	0.744188	0.144036
chr6	38508824	38509448	625	5.06515	0.00246501	1.498	0.0447456
chr22	24525228	24525866	639	-2.28131	0.00256469	0.556938	2.70738
chr16	23219328	23220118	791	5.16124	0.0025659	5.21894	0.145846
chr17	76306997	76308976	1980	3.52781	0.00261245	0.556938	0.0482871
chr1	156881393	156881704	312	5.32256	0.00262885	1.8725	0.0467921
chr2	26730011	26731445	1435	2.16047	0.00263163	1.1235	0.251308
chr11	78022191	78023824	1634	2.58832	0.00277441	10.8028	1.79627
chr11	61560469	61561799	1331	2.45644	0.00289287	2.78469	0.507357
chr1	53112459	53112860	402	4.7759	0.0030293	25.1248	0.917093
chr20	61697420	61698223	804	2.98838	0.00304014	3.52406	0.444069
chr7	98953637	98954270	634	4.96068	0.0030847	1.11869	0.035925
chr1	24090397	24091611	1215	4.9476	0.00314135	1.86288	0.0603682
chr10	70326258	70326616	359	4.92944	0.00317193	17.3132	0.568157
chr20	56673700	56674161	462	4.33413	0.0032659	2.98157	0.147823
chr20	63194996	63195722	727	5.29281	0.00327356	0.369688	0.00943065
chr10	127736277	127738046	1770	2.31136	0.00329339	3.15919	0.636483
chr16	288249	289400	1152	2.29375	0.00337086	0.931439	0.189962
chr20	57502936	57503585	650	2.75438	0.00338083	2.04531	0.303117
chr19	51643143	51644128	986	4.99331	0.0033852	1.67563	0.0526066
chr10	118304573	118304903	331	5.06126	0.0034517	1.30113	0.0389698
chr12	92746064	92746567	504	4.75129	0.00345312	0.18725	0.00695252
chr15	53202507	53203298	792	4.95198	0.00350459	1.10906	0.0358313
chr12	132500959	132501685	727	2.34483	0.00350801	2.59744	0.511307
chr1	219435834	219436285	452	5.22312	0.00351452	3.37051	0.0902359
chr5	32087164	32088467	1304	3.03898	0.00359102	7.8212	0.951586
chr19	13274850	13276652	1803	2.96743	0.00359253	17.1211	2.18901
chr15	75225931	75226649	719	5.02702	0.003671	1.86769	0.0572822
chr5	155693818	155694880	1063	5.44429	0.00372026	29.1625	0.669776
chr8	118837823	118838219	397	4.78713	0.00372564	1.11388	0.0403428
chr9	134813706	134814456	751	3.25628	0.0037483	0.749001	0.0783873
chr12	127484978	127486627	1650	2.65563	0.00376884	3.34163	0.530314
chr14	77270079	77271039	961	2.71743	0.00379331	0.18725	0.0284705
chr10	133060423	133061165	743	4.99324	0.00383081	1.30113	0.040851
chr9	127390515	127391254	740	4.82626	0.00386456	4.65719	0.164163
chr2	135796377	135797127	751	5.06743	0.00391036	5.58382	0.166527
chr10	71396053	71396866	814	4.88178	0.0039631	0	0
chr6	76337858	76338538	681	5.09517	0.00397213	2.03569	0.0595543
chr2	240711270	240712603	1334	2.7347	0.00401341	0.374501	0.0562635
chr9	136203754	136204464	711	3.47852	0.00401607	2.97194	0.266626
chr14	104706170	104706521	352	4.82868	0.00402246	2.7895	0.098163
chr7	128928805	128929775	971	2.74401	0.0040966	0.744188	0.111084
chr12	84361555	84363128	1574	2.60959	0.00414486	13.5778	2.22466
chr12	76518299	76519574	1276	4.22954	0.00419188	3.52888	0.188113
chr20	1819829	1821013	1185	4.84688	0.00421508	35.3706	1.2291
chr4	70521635	70522234	600	-1.98227	0.00424072	3.70169	14.6259
chr21	44886693	44887767	1075	2.12941	0.00435784	2.96231	0.67704
chr1	156434301	156435335	1035	4.26893	0.00436803	2.59263	0.134482
chr4	8109344	8110623	1280	3.42473	0.00447897	0.374501	0.0348744
chr19	4456689	4457238	550	4.72302	0.0045079	0.744188	0.0281782
chr2	237411757	237412518	762	4.98844	0.00453083	2.23738	0.0704804
chr10	132860522	132861323	802	3.17935	0.00462028	33.6805	3.71792
chr22	28678878	28680234	1357	2.20404	0.00465109	5.38694	1.16912
chr17	17436503	17437304	802	5.22387	0.00470345	1.30594	0.0349447
chr20	36341986	36343102	1117	3.42481	0.00470485	0.561751	0.0523086
chr1	204596744	204597401	658	5.29604	0.00470648	1.67081	0.0425267
chr2	60024765	60025401	637	5.34391	0.00470694	1.30113	0.0320364
chr2	85760765	85761275	511	5.16952	0.00471727	0.936252	0.0260143
chr2	175107862	175108590	729	5.24467	0.00472033	1.67563	0.0441952
chr11	2761181	2762158	978	5.16961	0.00475488	1.86288	0.051758
chr8	124879757	124880874	1118	4.22004	0.0048158	2.0405	0.109491
chr9	132589569	132590898	1330	2.36887	0.00487289	4.46032	0.863508
chr9	133054075	133054782	708	4.58226	0.00488801	3.52406	0.147112
chr1	203464575	203465307	733	4.38093	0.00494027	8.4022	0.403275
chr5	180154069	180155451	1383	2.30518	0.00496862	1.29631	0.262289
chr5	66646580	66647211	632	-2.12718	0.0049954	4.4555	19.4644
chr20	32608924	32609699	776	4.26102	0.00506338	1.1235	0.0585973
chr20	13838050	13839837	1788	2.6154	0.00507933	1.11869	0.182556
chr3	184761270	184761912	643	5.09494	0.00512478	1.48356	0.0434086
chr17	75898367	75899229	863	4.17126	0.00512928	3.15919	0.175349
chr21	44417820	44418666	847	4.19729	0.00513279	1.86288	0.101549
chr9	93670225	93671167	943	2.74959	0.00514094	1.30113	0.193468
chr15	65210889	65212568	1680	2.14121	0.00515236	6.16482	1.3975
chr3	11017985	11018930	946	2.16206	0.00516823	7.99401	1.78616
chr2	177282855	177283486	632	-5.20752	0.00517674	6.89938	254.936
chr14	77913166	77914077	912	4.11603	0.0051779	2.41982	0.139551
chr17	76708858	76710099	1242	2.70026	0.00520148	2.415	0.371585
chr6	45791634	45792169	536	4.55312	0.00521403	1.85325	0.0789419
chr3	48653422	48654315	894	4.68804	0.00530588	0.739375	0.0286829
chr6	42732745	42734449	1705	2.5906	0.00532182	3.34163	0.554767
chr3	128079497	128079917	421	5.07295	0.00533001	22.1336	0.65757
chr17	6413855	6414327	473	5.02041	0.00535356	0.926625	0.0285503
chr8	86828403	86829237	835	4.09222	0.00544265	2.41982	0.141874
chr20	63071563	63072063	501	3.02879	0.00546163	1.11869	0.137073
chr7	951738	952060	323	5.449	0.00552206	0.556938	0.0127495
chr2	27026988	27028042	1055	2.82208	0.00557927	7.45632	1.05437
chr4	13541758	13542244	487	4.14651	0.0056385	3.17363	0.179198
chr19	49894819	49895514	696	4.19501	0.00566024	5.97276	0.3261
chr10	8389006	8389944	939	-4.84927	0.00567524	22.3642	644.655
chr10	43123849	43124687	839	4.17267	0.00569563	4.09063	0.226825
chr20	3224166	3225203	1038	2.91398	0.0057688	12.0991	1.6053
chr19	1761654	1763074	1421	4.17297	0.0058226	5.76626	0.319671
chr20	59006175	59006544	370	2.30777	0.00585179	6.68807	1.35081
chr2	47353547	47354453	907	4.00724	0.00590459	4.27307	0.265731
chr22	20258327	20259748	1422	2.17166	0.00591901	0.561751	0.124683
chr20	607385	608248	864	4.68614	0.00592196	2.96713	0.115257
chr5	96324706	96325277	572	4.55108	0.0059474	1.29631	0.0552966
chr22	24516186	24517169	984	4.76289	0.00595884	6.86569	0.252878
chr8	139600000	139600486	487	-4.914	0.00598585	3.72094	112.18
chr20	63101629	63102189	561	-2.47463	0.00600286	0.931439	5.17717
chr2	240399538	240400208	671	4.89209	0.00602144	12.4832	0.420399
chr17	66974475	66975164	690	3.39632	0.0060265	7.42263	0.704961
chr10	103589371	103590204	834	4.28506	0.00603631	2.7895	0.143085
chr6	5703529	5704369	841	-5.26141	0.00612031	14.8693	570.341
chr17	76474554	76475081	528	4.96834	0.00613087	5.94869	0.190022
chr14	95299237	95299714	478	5.14996	0.00613621	1.29631	0.0365105
chr17	27558731	27559556	826	-2.17449	0.00614029	3.5385	15.9737
chr17	81135141	81135775	635	4.06798	0.00614681	1.47875	0.0881677
chr22	39090393	39091068	676	4.66484	0.0061511	0.926625	0.0365297
chr3	188817208	188818164	957	-2.38919	0.00622546	0.18725	0.980936
chr15	69714116	69714653	538	4.42192	0.0062642	26.7619	1.24849
chr1	197922188	197923645	1458	2.93145	0.0062987	1.67081	0.219014
chr20	55939720	55940323	604	4.31719	0.00636381	0.926625	0.0464836
chr1	150951090	150951586	497	5.03512	0.0063766	0.374501	0.0114217
chr8	88412607	88413145	539	5.32587	0.00638601	8.16682	0.203613
chr7	158012008	158013529	1522	2.49124	0.00639909	2.22775	0.396213
chr1	2061264	2062155	892	2.51121	0.0064397	2.97675	0.522147
chr1	41373766	41375068	1303	3.99579	0.00647616	1.29631	0.0812565
chr2	106174202	106175070	869	4.27547	0.00649939	4.08582	0.210977
chr15	66783393	66785642	2250	2.19928	0.00656773	4.82038	1.04962
chr19	4093655	4094781	1127	2.86483	0.00666314	0	0
chr14	99821296	99822292	997	4.42423	0.00668503	0	0
chr1	203058813	203060089	1277	2.18574	0.00669554	0.556938	0.122415
chr9	135239026	135239765	740	3.73274	0.00670683	0.931439	0.0700627
chr11	126415237	126416406	1170	4.64721	0.00671436	2.98157	0.118986
chr14	64846816	64847323	508	5.29933	0.00672032	0.18725	0.00475515
chr7	156237023	156237959	937	4.12079	0.00672321	2.23738	0.128605
chr12	64631153	64631915	763	2.9008	0.00672631	0.561751	0.0752169
chr17	1271928	1272744	817	4.01061	0.0067335	0.744188	0.0461708
chr8	123509717	123510820	1104	2.48733	0.00674095	1.48838	0.265432
chr15	100140685	100142268	1584	2.93516	0.00674922	7.81638	1.02196
chr7	134470836	134471672	837	3.17502	0.00679885	4.64757	0.514574
chr15	57619793	57620508	716	-3.39943	0.00680332	13.0257	137.446
chr1	94375460	94376046	587	4.6121	0.00680624	1.67081	0.0683201
chr10	98300791	98302130	1340	2.99728	0.00685172	1.68044	0.210452
chr1	207027186	207027555	370	3.71768	0.00685254	0.561751	0.0426983
chr15	70043643	70044915	1273	3.43226	0.00692407	1.1235	0.104078
chr17	55577667	55578069	403	4.72346	0.00694039	2.96713	0.112314
chr1	208177646	208178775	1130	-4.04072	0.00696749	2.98157	49.0709
chr19	1378559	1379746	1188	4.62742	0.0069883	2.41982	0.0979017
chr2	118275765	118276445	681	5.07329	0.00706478	1.68525	0.0500555
chr8	124553019	124553603	585	3.33041	0.00708881	27.2278	2.70682
chr9	135263506	135263830	325	4.95457	0.00709298	2.60707	0.0840773
chr9	131111310	131112104	795	3.83616	0.00716315	0.744188	0.0521055
chr7	1225223	1225808	586	4.8447	0.00717024	1.11869	0.0389322
chr10	6221385	6221886	502	4.06937	0.00721305	1.68525	0.100383
chr13	95271093	95271932	840	-4.23042	0.0072572	0.926625	17.3936
chr17	50830278	50831259	982	2.92553	0.00732113	1.11869	0.147244
chr20	51680432	51680974	543	2.48061	0.00732563	2.59744	0.465379
chr1	172909426	172910349	924	3.63317	0.00741676	1.11869	0.0901604
chr1	3880458	3881376	919	-4.73946	0.00743043	1.666	44.5036
chr15	99988852	99989738	887	3.38997	0.00745074	3.35607	0.320145
chr20	42114849	42115530	682	3.18863	0.00747674	11.326	1.24223
chr9	129058188	129058553	366	4.62942	0.00749019	14.8982	0.60192
chr16	1619799	1620889	1091	2.95001	0.00753049	5.40138	0.69898
chr9	121644763	121645652	890	3.07223	0.00753129	2.41982	0.287707
chr6	54053847	54054473	627	4.22525	0.00753203	1.85806	0.0993422
chr5	180194433	180195637	1205	3.3502	0.00755253	0.744188	0.0729746
chr20	19816992	19817489	498	4.36515	0.0075754	1.11869	0.0542837
chr4	154164981	154165824	844	4.20975	0.007611	1.85325	0.100155
chr3	27166881	27167502	622	-4.38385	0.00762065	1.30113	27.1637
chr5	140251365	140251997	633	4.22657	0.00763845	0.18725	0.0100022
chr10	5557891	5558972	1082	2.27804	0.00764829	0.749001	0.154427
chr11	64219761	64221249	1489	2.09856	0.00765912	2.98157	0.696169
chr9	135328495	135329164	670	4.72355	0.00769532	4.46032	0.168825
chr5	80960518	80961368	851	4.51108	0.00771748	1.47875	0.0648522
chr2	68769357	68770405	1049	-4.97933	0.00771893	0.931439	29.3821
chr7	123049507	123050226	720	-4.96282	0.0077327	2.04531	63.7847
chr6	33869595	33870841	1247	2.37858	0.00773397	0.561751	0.108024
chr6	118860863	118862927	2065	2.0915	0.00775064	0.556938	0.130678
chr5	181024560	181025124	565	5.03669	0.00775715	0.556938	0.0169673
chr6	1630722	1631249	528	4.4289	0.00776276	5.38694	0.250098
chr1	8047676	8048156	481	-4.74282	0.00778221	2.23738	59.906
chrX	105328730	105329269	540	-2.35508	0.00778968	2.04531	10.4643
chr14	95439255	95439763	509	3.56339	0.00782974	1.29631	0.109653
chr16	88844423	88844787	365	-2.79856	0.00785642	2.60225	18.105
chr1	65173027	65173674	648	4.42934	0.00788304	0.739375	0.0343164
chr11	73498311	73499121	811	3.5371	0.00788369	1.86769	0.160891
chr8	97272285	97273152	868	4.88692	0.00788519	1.1235	0.0379722
chr8	142945306	142946204	899	2.59524	0.00792628	0.936252	0.154935
chr17	73362232	73363047	816	4.68178	0.0079372	0.374501	0.0145913
chr13	50678470	50678964	495	4.21043	0.00794221	1.31075	0.0708034
chr2	233967438	233968633	1196	3.05367	0.00796682	0.556938	0.0670748
chr2	30266120	30266972	853	4.20628	0.00802444	1.48356	0.0803695
chr16	26034114	26034956	843	4.72358	0.00803368	0.374501	0.0141747
chr9	133519551	133520233	683	2.66248	0.00804666	1.29631	0.20475
chr16	87692025	87692731	707	2.19138	0.00808075	14.1492	3.09785
chr11	117547224	117547751	528	4.95388	0.00808615	9.87614	0.318654
chr21	44846491	44847038	548	3.23324	0.00810429	1.67563	0.178187
chr19	18430607	18431526	920	3.79278	0.00810969	44.7143	3.22631
chr12	53282191	53282823	633	4.17747	0.0081164	0.749001	0.0413941
chr2	241724180	241725359	1180	2.46133	0.00814004	0.749001	0.136003
chr19	17218983	17220075	1093	4.72359	0.00814303	0.936252	0.0354365
chr4	7675824	7676342	519	4.80233	0.00814418	1.49319	0.0535141
chr3	13886466	13887190	725	4.50911	0.00817605	1.1235	0.0493397
chr1	166936069	166937370	1302	2.75072	0.00818505	1.30113	0.193317
chr2	27021238	27022037	800	2.6079	0.00823703	3.164	0.519015
chr9	134255867	134256633	767	3.46182	0.00828267	3.73538	0.339019
chr9	124355202	124356033	832	2.78061	0.00829618	1.86288	0.271105
chr5	178246061	178246830	770	3.93169	0.00835119	58.2243	3.81546
chr20	40927808	40928634	827	2.12391	0.00835265	5.76626	1.32292
chr4	53927234	53928131	898	5.25363	0.00836804	23.4443	0.614522
chr3	138396360	138397712	1353	2.17247	0.00837516	0.749001	0.166152
chr9	99256392	99256892	501	4.88726	0.00838141	7.62432	0.257626
chr17	76505045	76505871	827	4.8442	0.00840877	1.10906	0.0386107
chr7	122672971	122674357	1387	2.65873	0.00840995	1.30594	0.206808
chr13	27201409	27202054	646	4.47322	0.00842897	0.749001	0.0337218
chr8	143448359	143448942	584	4.54664	0.00844312	8.39257	0.359104
chr9	127082797	127083550	754	3.59388	0.00845924	0.739375	0.0612347
chr2	131039998	131040922	925	3.28407	0.00845974	0	0
chr22	27115766	27116189	424	-4.38227	0.00846631	0.926625	19.324
chr6	12208228	12208832	605	4.68092	0.00848272	0	0
chr9	135301570	135302617	1048	2.55321	0.00848362	0.556938	0.0948883
chr17	7702139	7702740	602	4.67924	0.00848487	0.936252	0.0365427
chr20	63312323	63312795	473	2.9613	0.00853203	0.749001	0.0961705
chr2	70905554	70906540	987	3.44001	0.00855746	0.749001	0.0690138
chr17	78235992	78236918	927	3.78347	0.0086057	1.67563	0.121685
chr7	1768787	1769983	1197	2.71918	0.00863555	0.556938	0.0845767
chr8	141590690	141591978	1289	2.18674	0.00865301	24.4191	5.36358
chr8	47610105	47610846	742	3.62912	0.00866186	1.666	0.134648
chr17	80999875	81000278	404	4.88745	0.00867136	2.0405	0.0689397
chr22	39382271	39384714	2444	2.24572	0.0087023	5.21413	1.09939
chrX	71555084	71555658	575	-2.55867	0.00873176	1.30113	7.66578
chr3	64815207	64815495	289	2.43843	0.00875782	2.23256	0.411873
chr20	37251549	37252828	1280	2.77273	0.00879773	0.18725	0.0273999
chr16	81551251	81552239	989	2.32421	0.00880218	0	0
chr11	76796050	76796747	698	3.3676	0.00881407	1.1235	0.108849
chr1	22729840	22730456	617	4.8705	0.00882522	3.34163	0.114233
chr5	179586315	179586848	534	4.81397	0.00883687	12.2671	0.436104
chr14	75295137	75295426	290	-2.24109	0.00889285	19.3537	91.4953
chr3	128268971	128269667	697	4.97585	0.00894793	27.9095	0.886895
chr5	10138724	10139769	1046	3.85452	0.00900101	1.11869	0.0773361
chr1	204009918	204010516	599	5.14737	0.00902005	1.48356	0.0418593
chr3	22372511	22373424	914	3.36053	0.00902819	1.11388	0.108446
chr2	9386528	9387681	1154	3.02939	0.00909246	2.60225	0.318723
chr3	48645737	48646955	1219	3.31647	0.00909492	0.374501	0.0375922
chr16	88519611	88521163	1553	2.7411	0.00909564	1.85806	0.277912
chr10	69935530	69935969	440	4.8877	0.00910806	0.931439	0.0314637
chr16	4783478	4784321	844	2.91895	0.00917523	6.16482	0.815135
chr7	67605239	67606679	1441	3.86863	0.00920729	2.04531	0.140018
chr13	27381040	27381492	453	4.6347	0.00923056	2.40538	0.0968279
chr7	1963034	1964007	974	2.66762	0.00923134	4.27788	0.673276
chr11	73333548	73333865	318	4.67987	0.00923273	0.936252	0.0365269
chr19	19107681	19108298	618	-4.15056	0.00923309	0	0
chr9	107425138	107426179	1042	2.76602	0.00923384	0.556938	0.0818748
chr2	120992753	120993335	583	-4.63157	0.00923965	2.41019	59.7439
chr6	42131528	42131946	419	4.18925	0.00927377	2.415	0.132381
chr1	160377718	160378236	519	5.21543	0.0092873	7.61469	0.204951
chr1	203628275	203628949	675	2.09321	0.00937249	1.85806	0.435454
chr1	240092770	240093644	875	3.89744	0.00941071	0.556938	0.0373732
chr5	113059582	113060009	428	4.99559	0.0094369	0.374501	0.0117389
chr16	25616245	25617024	780	4.9956	0.0094651	1.48838	0.0466539
chr12	108634403	108635654	1252	3.59369	0.00947935	2.97194	0.246167
chr1	22879889	22880971	1083	2.72297	0.00949922	1.11388	0.16871
chr22	21977731	21979929	2199	2.23516	0.0095224	0.18725	0.0397715
chr21	25881811	25882141	331	-4.79751	0.00955269	1.84844	51.4041
chr2	1930842	1931577	736	4.84382	0.00956006	0.931439	0.0324353
chr14	22846396	22847370	975	2.55718	0.00963309	0.739375	0.125625
chr16	2773319	2773674	356	3.79828	0.00973086	2.9575	0.212583
chr1	11674225	11675013	789	4.6363	0.00974919	2.77506	0.111585
chr3	133564306	133565248	943	4.1209	0.00976766	3.52888	0.202825
chr5	173429217	173430242	1026	4.39304	0.00977284	1.30113	0.0619274
chr10	79266584	79267077	494	2.97638	0.00981292	1.84844	0.234868
chr2	119076387	119077592	1206	2.64376	0.00984379	1.85806	0.29731
chr9	137013988	137014323	336	4.54504	0.00985395	0.18725	0.008021
chr8	135273859	135274405	547	4.81616	0.00987109	1.47875	0.052491
chr17	66990822	66991644	823	2.9062	0.00988881	14.1444	1.88682
chr20	57800260	57800687	428	3.00094	0.00989952	1.49319	0.186527
chr17	82043127	82044180	1054	3.15135	0.00992743	2.42463	0.272894
chr15	80840781	80841134	354	5.66113	0.00997656	2.415	0.0477251
chr6	33641154	33641930	777	3.84489	0.010019	2.59744	0.180766
chr17	81150257	81151075	819	4.39293	0.0100223	2.59263	0.123406
chr3	63269716	63270313	598	3.8554	0.0100431	0.561751	0.0388108
chr21	43954864	43955477	614	4.35476	0.0100476	0.749001	0.0366075
chr8	128050555	128050937	383	4.58966	0.0100795	3.16882	0.131605
chr9	91988177	91988753	577	5.23399	0.0100831	1.86288	0.0494991
chr15	77644426	77645598	1173	2.29485	0.010089	3.15438	0.642828
chr2	235018101	235018766	666	4.84367	0.0101217	1.30594	0.0454815
chr5	178196457	178197404	948	-2.59974	0.0101398	0.931439	5.64616
chr8	98973917	98974732	816	2.75382	0.0101436	0.374501	0.0555227
chrX	70068073	70068875	803	4.84364	0.0102023	0.931439	0.0324393
chr10	119412203	119412562	360	4.88829	0.0102382	29.806	1.00643
chr1	22464632	22465704	1073	4.68602	0.010315	0.369688	0.0143616
chr16	89132328	89134204	1877	2.15136	0.0103204	0.556938	0.125367
chr3	24318665	24319161	497	4.21395	0.0103283	4.26344	0.229739
chr10	70254326	70255507	1182	3.98516	0.0103348	0.556938	0.0351686
chr20	57429041	57429411	371	2.29648	0.0103685	0.369688	0.0752533
chr15	75785687	75786953	1267	2.16955	0.0103701	0	0
chr7	155973453	155974515	1063	2.20101	0.0104079	4.65719	1.01287
chr3	15030039	15030553	515	4.88839	0.0104621	1.67081	0.0564126
chr14	76507674	76509172	1499	2.66169	0.0104683	2.96713	0.468908
chr8	94960438	94961329	892	4.49511	0.0104799	7.79713	0.345758
chr15	66821141	66821611	471	5.52118	0.0104825	2.22775	0.0485094
chr2	70518524	70519201	678	4.4363	0.0105022	2.77988	0.128401
chr10	34029143	34029877	735	4.88841	0.0105116	17.8653	0.603187
chr16	30001294	30001998	705	2.5647	0.0105391	30.8285	5.21075
chr4	80454046	80454878	833	-4.27019	0.0105606	0.931439	17.9725
chr9	137505421	137506031	611	3.78936	0.0105619	5.94869	0.43024
chr11	33689135	33689829	695	3.7185	0.0106547	9.10788	0.691892
chr3	5345366	5346708	1343	3.77168	0.0106684	0.749001	0.0548395
chr2	119294236	119294631	396	4.6782	0.0106766	6.13113	0.239476
chr10	71087632	71088498	867	4.54429	0.0106786	2.97194	0.127372
chr10	126252319	126253579	1261	3.61702	0.01068	10.8028	0.880448
chr8	21691421	21693156	1736	-4.49795	0.010697	1.49319	33.739
chr14	65861749	65862335	587	4.84352	0.0107094	3.73057	0.129936
chr10	91598630	91598984	355	4.184	0.0107125	1.11869	0.0615461
chr20	58187171	58187996	826	2.19313	0.0107475	5.2045	1.1381
chrX	74119054	74119727	674	-3.82429	0.0107516	0	0
chr11	68318443	68319107	665	4.72378	0.0107543	3.34644	0.126643
chr5	131825407	131825826	420	4.54414	0.0108514	0.374501	0.016052
chr19	35843455	35844616	1162	2.77251	0.0108536	2.22294	0.325325
chr1	207088470	207089201	732	2.52175	0.0108729	1.11388	0.19396
chr16	88836692	88837707	1016	2.24593	0.0108978	6.14557	1.29559
chr17	4899272	4900136	865	2.39228	0.010919	6.32801	1.20537
chr1	17189961	17190315	355	-4.12363	0.0109195	0.744188	12.9723
chr10	132350878	132351339	462	4.86575	0.0109357	1.49319	0.0512127
chr20	58010257	58010594	338	2.87055	0.010948	3.52888	0.48252
chr7	132175976	132176703	728	3.81126	0.0109484	5.94869	0.423759
chr17	67002435	67002739	305	5.06591	0.0109766	1.86288	0.0556152
chr22	22697828	22698684	857	5.17662	0.0110034	2.79432	0.0772605
chr1	11187055	11187921	867	4.72379	0.011006	0.369688	0.0139904
chr6	160238828	160239415	588	-4.2343	0.0110227	0.739375	13.916
chr7	20228475	20229173	699	-4.70459	0.0110684	12.2863	320.366
chr11	16811176	16811934	759	4.15137	0.0110725	6.31357	0.355294
chr14	74412584	74413362	779	3.15842	0.0110761	3.15438	0.353292
chr16	81440967	81441492	526	3.02383	0.0110864	3.91782	0.481706
chr4	7728923	7729587	665	3.34362	0.0111491	1.85325	0.182559
chr20	59586629	59587592	964	2.16859	0.011155	5.2045	1.15763
chr5	2906889	2908432	1544	2.74271	0.0111621	1.67081	0.249627
chr2	218329744	218330846	1103	2.79794	0.0111776	0.744188	0.107008
chr21	42094213	42094482	270	4.63284	0.0112063	1.29631	0.0522498
chr7	33602658	33603657	1000	3.40139	0.0112384	0.749001	0.0708863
chr3	8839848	8840235	388	4.59043	0.0112488	1.11869	0.0464356
chr3	134320641	134321116	476	-4.23447	0.011275	1.11869	21.0577
chr1	176997738	176998239	502	5.03921	0.0112773	4.63794	0.141049
chr20	48265750	48266057	308	3.52124	0.0112802	0.556938	0.0485073
chr11	64891682	64892135	454	4.43777	0.0112907	7.43707	0.343164
chr12	102010192	102011470	1279	3.54119	0.0113458	5.19969	0.446655
chr20	41145567	41146015	449	2.71384	0.0113474	3.54332	0.540084
chr10	132677370	132678072	703	4.59049	0.0113494	0.369688	0.0153447
chr1	27355943	27357206	1264	2.81911	0.0113748	12.0943	1.71373
chr12	115866877	115867490	614	-2.40985	0.0113848	5.57901	29.6478
chr19	4354504	4355579	1076	3.26486	0.0113861	2.78469	0.289705
chr20	42030454	42031120	667	4.59052	0.0114102	2.98638	0.123954
chr4	147550628	147551008	381	4.35075	0.0114137	26.3778	1.2928
chr7	101620986	101621555	570	2.92442	0.0114293	0.926625	0.122058
chr5	142615	143557	943	2.76592	0.0114584	3.15919	0.464462
chr17	65742551	65743278	728	3.69258	0.0114681	1.67563	0.129598
chr17	82057700	82058939	1240	2.46242	0.0115197	38.1168	6.91599
chr17	57279693	57280751	1059	2.36103	0.0115281	2.0405	0.397188
chr11	64531946	64532993	1048	3.1454	0.0115373	2.21813	0.250685
chr8	98940186	98940688	503	2.73633	0.0115559	1.30113	0.195255
chr10	119281947	119282933	987	3.80308	0.0115887	3.52888	0.252812
chr20	33843588	33844567	980	2.43888	0.0116016	1.85806	0.342676
chr6	6008351	6009518	1168	2.59008	0.0116447	1.30594	0.216886
chr4	7637676	7638824	1149	2.32606	0.0116983	10.0297	2.0002
chr17	57571186	57571554	369	5.03943	0.0117024	2.59263	0.0788351
chr16	88113262	88114726	1465	2.48531	0.0117262	1.8725	0.334404
chr2	239735792	239736858	1067	2.10755	0.0117439	1.8725	0.434498
chr14	51396232	51396898	667	-4.00748	0.0117486	1.31075	21.081
chr1	204294093	204294798	706	2.24713	0.0118163	0	0
chr9	127855757	127856531	775	2.41828	0.0118269	0.18725	0.0350306
chr12	10031791	10032220	430	4.59079	0.0118713	0.749001	0.0310827
chr3	195237997	195239119	1123	3.80562	0.0118949	1.1235	0.0803467
chr1	228072953	228073595	643	3.26596	0.0118984	1.498	0.155726
chr9	123526889	123527662	774	3.57431	0.0118993	1.498	0.125759
chr3	122909841	122910498	658	4.49791	0.0119544	0.18725	0.00828735
chr10	114151478	114151853	376	4.1804	0.0119566	0.18725	0.0103276
chr7	100575792	100576307	516	3.80392	0.011964	0.374501	0.0268139
chr17	76833787	76834496	710	4.75281	0.0119683	8.05177	0.298644
chr2	10983580	10984732	1153	2.84668	0.0119815	0.18725	0.0260307
chr22	44669581	44670499	919	4.34928	0.0119976	0.18725	0.00918671
chr17	67505461	67506163	703	4.99595	0.0120162	2.43425	0.0762844
chr3	128401069	128402137	1069	2.46057	0.0120304	0.561751	0.102056
chr11	70474643	70475422	780	3.15493	0.0120371	1.31075	0.147161
chr16	1224287	1224867	581	2.54233	0.0120617	0.561751	0.0964333
chr2	3102374	3103389	1016	3.28254	0.0120653	1.498	0.153946
chr1	34576200	34576777	578	4.84322	0.0120724	0.749001	0.0260933
chr9	73176288	73176963	676	-2.46565	0.0120792	0.374501	2.06864
chr11	130383321	130384201	881	3.99248	0.0120809	0.374501	0.0235287
chr1	24955088	24956312	1225	2.28999	0.0120825	0.18725	0.0382883
chr6	43894246	43894906	661	4.72385	0.0120827	0.936252	0.0354301
chr3	62912244	62912707	464	3.41073	0.0120891	1.498	0.140858
chr9	81121924	81123157	1234	2.28456	0.0120933	0.749001	0.153731
chr9	130527765	130528708	944	2.3918	0.0121238	14.231	2.71165
chr16	86115779	86116857	1079	2.3213	0.0121487	17.976	3.59676
chr20	31945095	31946603	1509	2.17691	0.0121544	5.43026	1.2009
chr17	44909690	44910010	321	4.25759	0.0121644	0.18725	0.00978952
chr16	50610846	50612373	1528	2.26566	0.0121737	0.18725	0.0389397
chr9	112670418	112670916	499	4.43919	0.012174	0.18725	0.00863163
chr7	45182376	45183286	911	3.13342	0.012187	0.561751	0.0640162
chr3	46845213	46846613	1401	3.54328	0.012204	0.374501	0.0321233
chr8	11753638	11754307	670	5.03971	0.0122606	1.1235	0.0341563
chr17	50447811	50448257	447	-2.01725	0.012311	1.1235	4.54807
chr16	2289374	2290027	654	4.39212	0.0123509	12.1713	0.579664
chr1	112017079	112017507	429	2.43272	0.0123546	0.936252	0.173409
chr9	93305653	93306317	665	3.13245	0.0124217	0.18725	0.0213531
chr7	128167828	128168505	678	2.64548	0.0124548	0.561751	0.0897791
chr3	64311694	64312004	311	2.55268	0.0124634	0.561751	0.095744
chr12	119008709	119009509	801	4.82028	0.0124916	3.18326	0.112674
chr9	137720535	137721525	991	2.2104	0.0124948	0.374501	0.0809198
chr2	103121927	103123030	1104	5.03982	0.0125059	0.18725	0.00569228
chr17	4955669	4957010	1342	2.6687	0.0125694	1.1235	0.176692
chr9	134602073	134603295	1223	2.39327	0.0126013	0.18725	0.0356432
chr20	33006588	33007258	671	4.49656	0.0126063	0	0
chr2	187630178	187630894	717	4.54399	0.0126545	1.31075	0.056188
chr6	11795958	11796920	963	4.39201	0.0127242	0.936252	0.0445928
chr16	66930243	66930524	282	3.57111	0.0127467	1.498	0.126038
chr3	64408365	64408715	351	2.84139	0.0127694	1.1235	0.156758
chr1	94020897	94021535	639	-2.02703	0.0127889	2.62151	10.6844
chr15	53257497	53258073	577	3.7738	0.0128058	2.247	0.164277
chr7	139912476	139913625	1150	3.89843	0.0128098	2.05975	0.138125
chr12	113807944	113809242	1299	2.23377	0.0128691	1.31075	0.278669
chrX	106932334	106932869	536	4.31008	0.0128873	2.99601	0.151035
chr8	127762951	127764288	1338	2.39675	0.0129016	0.561751	0.106672
chr9	129702556	129703505	950	2.21283	0.0129064	1.498	0.323135
chr2	43060316	43061010	695	4.39197	0.012914	0.936252	0.0445943
chr14	30430128	30430768	641	4.88933	0.0129186	4.49401	0.151635
chr5	72599545	72600085	541	4.49158	0.0129513	7.86452	0.3496
chr1	157106124	157106926	803	3.14241	0.0129979	1.31075	0.148444
chr2	101630222	101631112	891	2.54637	0.0130029	2.247	0.384654
chr12	129540152	129541086	935	4.17783	0.0130207	1.1235	0.0620759
chr14	102770416	102771179	764	3.63865	0.0130245	2.05975	0.165376
chr20	1812651	1813444	794	3.63865	0.013053	0.374501	0.0300684
chr17	80118928	80119780	853	3.89095	0.0130878	0.18725	0.012622
chr14	51843127	51844142	1016	3.90359	0.0131316	0.369688	0.0247022
chr1	166637911	166638677	767	3.79858	0.0131407	0.931439	0.0669374
chr2	46844872	46845490	619	4.88941	0.0131642	1.666	0.0562105
chr16	79348275	79349185	911	4.16643	0.0131642	1.11869	0.0623003
chr15	50336064	50336646	583	3.76623	0.0131809	1.48838	0.109387
chr3	136240935	136241867	933	3.7722	0.0131839	1.67081	0.122287
chr7	105487824	105488338	515	-2.50004	0.0132042	0.374501	2.11856
chr9	135810783	135811549	767	3.80645	0.0132056	0.561751	0.0401504
chr17	83135109	83135854	746	2.30656	0.0132138	0	0
chr3	131795184	131795816	633	-4.05908	0.0133516	1.68044	28.0109
chr19	51115375	51115988	614	3.84047	0.0133554	0.369688	0.025807
chr13	113489827	113490303	477	2.79345	0.0133707	2.79432	0.403054
chr1	201267584	201268249	666	2.42623	0.0134241	1.67081	0.310857
chr15	51961100	51962072	973	2.44245	0.0134282	0.931439	0.171357
chr7	138633298	138634257	960	4.10789	0.0134393	1.85325	0.107482
chr19	13430877	13431709	833	3.7969	0.013447	2.415	0.173754
chr6	138517575	138517993	419	-2.08978	0.013484	2.04531	8.70655
chr9	109996402	109997519	1118	3.60627	0.0134974	2.22775	0.182924
chr17	34146335	34147010	676	-3.83467	0.0135256	3.164	45.1427
chr14	28829849	28830431	583	4.87053	0.0136058	0.561751	0.0192029
chr15	41477055	41477599	545	4.39179	0.0136422	1.29631	0.0617519
chr15	95971911	95972620	710	4.72392	0.013674	3.15438	0.119363
chr2	10276564	10277045	482	3.71508	0.0136925	2.23738	0.170368
chr10	71759362	71759932	571	4.17636	0.0137021	0.561751	0.0310695
chr10	97465692	97467131	1440	2.13719	0.0137069	0.561751	0.127698
chr2	25250552	25251191	640	-4.3763	0.0137113	0.561751	11.6665
chr9	133671204	133672071	868	2.55268	0.0137324	2.60707	0.444344
chr11	69056089	69056390	302	5.12735	0.0137342	1.67081	0.0478016
chr11	120565553	120566589	1037	3.4162	0.0137706	2.05013	0.192045
chr1	202986432	202987168	737	4.54213	0.0137986	3.34163	0.14343
chr7	44272515	44273020	506	4.49373	0.0138152	1.67563	0.0743755
chr2	241627350	241628636	1287	2.39661	0.0138349	1.30113	0.247098
chr2	9740679	9741064	386	4.34534	0.0138421	1.85325	0.0911712
chr6	123056734	123057720	987	-2.47588	0.0138889	5.55975	30.9293
chr6	4378204	4378856	653	4.99614	0.0139019	3.34644	0.104857
chr5	178941088	178942444	1357	2.48889	0.0139257	1.29631	0.230929
chr5	135824079	135824754	676	4.34517	0.013931	1.67081	0.0822057
chr7	122299624	122300854	1231	2.3857	0.0139908	3.91782	0.749683
chr4	5722288	5722747	460	-4.3537	0.0140026	2.23256	45.6454
chr11	46876224	46877191	968	2.52311	0.0140313	1.11869	0.194616
chr1	203197175	203198214	1040	2.3621	0.0140868	1.48356	0.288565
chr17	68686405	68687370	966	2.36594	0.0141036	2.41019	0.467553
chr7	47531934	47532390	457	-4.5372	0.0141123	0.744188	17.2789
chr3	130473422	130474146	725	4.72393	0.0141445	0.556938	0.0210747
chr8	42196230	42196711	482	4.13951	0.0141504	0.749001	0.0424978
chr3	128534072	128534834	763	4.9364	0.0141718	0.561751	0.0183459
chr11	69158903	69159719	817	2.96451	0.0142008	2.22775	0.285405
chr19	55452113	55452663	551	3.14949	0.0142589	0.18725	0.0211024
chr20	62717388	62717934	547	4.77226	0.0142659	0.18725	0.0068522
chr12	49478695	49479743	1049	2.0947	0.0142698	0.369688	0.0865502
chr13	20967151	20967994	844	4.64315	0.0142928	0.744188	0.029782
chr6	106396443	106396925	483	-2.17518	0.0143168	1.48838	6.72212
chr14	77265032	77265666	635	3.33768	0.0143184	3.164	0.312965
chr10	132931208	132932451	1244	2.77677	0.0143264	3.70169	0.540142
chr15	74408186	74409286	1101	2.36416	0.0143503	1.11388	0.216348
chr15	77799164	77800010	847	3.96111	0.0143896	0.369688	0.0237368
chr7	132079065	132079967	903	2.89475	0.0144019	1.86288	0.250483
chr9	126155732	126157219	1488	2.12866	0.0144123	0.926625	0.211892
chr10	71003910	71005613	1704	2.44406	0.0144589	4.46513	0.820537
chr21	45571988	45573276	1289	2.15604	0.0144814	0.931439	0.208989
chr7	400212	401453	1242	2.62756	0.0144844	4.82038	0.780021
chr9	65458804	65459740	937	3.96	0.0145259	0.561751	0.0360966
chr1	16965913	16966593	681	3.93345	0.0145469	1.67563	0.109671
chr16	27761859	27762858	1000	2.14819	0.0145974	1.666	0.375841
chr13	45500523	45501226	704	4.03686	0.0146044	0.744188	0.0453384
chr8	141623159	141623861	703	3.84367	0.0146204	1.10906	0.0772498
chr6	166981369	166981663	295	-4.73455	0.0146331	1.86769	49.7218
chr17	58210838	58211261	424	2.26919	0.0146601	2.04531	0.424294
chr9	91187743	91188283	541	4.77329	0.0146779	5.20932	0.190492
chr20	60820827	60821328	502	4.72396	0.0146979	0.374501	0.014171
chr2	46072587	46073411	825	4.6959	0.0147486	4.65238	0.179501
chr5	170146453	170147689	1237	2.23288	0.014767	0.926625	0.197124
chr3	127460680	127461453	774	3.35926	0.0147776	0.926625	0.0902954
chr11	75406348	75406714	367	4.39151	0.0148604	7.413	0.353197
chr22	18154878	18155391	514	4.98338	0.0148856	1.86288	0.0588894
chr9	84893093	84893581	489	4.77341	0.0148869	0.374501	0.0136935
chr9	105128681	105129026	346	5.17845	0.0148936	0.374501	0.0103415
chr20	51483487	51483751	265	4.49611	0.0149051	1.666	0.0738264
chr3	125431443	125432481	1039	3.65162	0.014985	2.40538	0.191397
chr5	96880356	96880760	405	-3.9391	0.0150024	0.374501	5.74434
chr17	82390441	82391252	812	3.29799	0.0150221	2.79432	0.284107
chr7	1662802	1663622	821	2.16497	0.0150247	2.97675	0.663775
chr2	19878880	19879580	701	5.10328	0.0150269	0.556938	0.0162019
chr15	90918995	90920516	1522	2.15783	0.0150712	1.47875	0.331377
chr2	104842402	104843839	1438	3.15082	0.0150881	0.744188	0.0837897
chr3	197356869	197357293	425	4.54145	0.0151237	0.556938	0.0239163
chr8	57005341	57006102	762	4.04459	0.0151662	2.59263	0.157107
chr8	144881568	144882795	1228	2.42151	0.0151819	0.556938	0.103958
chr12	57538041	57539069	1029	4.34297	0.0151958	2.42463	0.119476
chr5	115360327	115360703	377	-4.71724	0.0152374	0.561751	14.7766
chr2	206467177	206468213	1037	4.49692	0.0153159	0.556938	0.024666
chr11	47448322	47449110	789	3.11845	0.0153277	2.22294	0.255965
chr9	105750983	105751964	982	3.71191	0.015328	2.96713	0.226433
chr5	178990387	178990813	427	4.39141	0.0153557	0	0
chr15	95734511	95735414	904	3.55132	0.0153592	1.11388	0.0950133
chr3	126405988	126407163	1176	2.09512	0.0153671	0.744188	0.174177
chr17	8911066	8912467	1402	2.77352	0.0153685	1.11869	0.163605
chr6	1701868	1702437	570	-4.05595	0.0153943	2.97675	49.5115
chr3	133514806	133516497	1692	2.24678	0.0154021	1.85806	0.391482
chr17	18203129	18203840	712	2.51632	0.0154092	1.10906	0.193851
chr3	150184563	150185019	457	-4.37511	0.0154115	0.556938	11.557
chr5	14123986	14124870	885	3.83935	0.01542	1.30594	0.0912356
chr17	50354128	50355467	1340	-1.97905	0.0154611	1.30594	5.14845
chr13	29519856	29520703	848	3.85981	0.0154757	0.18725	0.0128975
chr5	31913115	31913764	650	4.09264	0.0155292	1.48356	0.086956
chr5	171836721	171837376	656	4.39137	0.0155438	4.26825	0.203383
chr15	70033961	70035382	1422	2.50054	0.0155738	0.931439	0.164595
chr1	12759215	12759681	467	5.27082	0.0155889	0.556938	0.0144255
chr13	112973366	112973877	512	4.77379	0.0155969	2.03569	0.0744146
chr11	68934218	68934776	559	-4.59985	0.0156046	0.744188	18.0458
chr16	86443232	86443525	294	4.44331	0.0156205	1.30113	0.0598067
chr10	133116559	133118150	1592	2.49601	0.0156669	0	0
chr11	64143747	64144335	589	3.77632	0.0156835	1.30594	0.0953097
chr8	125057761	125058785	1025	2.92681	0.0157172	0.744188	0.0978643
chr3	49609461	49610105	645	4.87335	0.0157314	1.85325	0.0632281
chr2	148530382	148531961	1580	2.1738	0.0157331	1.85806	0.411795
chr5	75567568	75568359	792	3.49337	0.0157669	0.374501	0.0332539
chr4	73917113	73917823	711	3.97346	0.0157805	1.11388	0.0709098
chr10	65759928	65760786	859	-5.08878	0.0157876	3.34644	113.883
chr12	129956932	129957768	837	3.90692	0.0157893	0.556938	0.0371284
chr9	126234379	126235427	1049	2.25242	0.0158503	0.744188	0.156184
chr6	16392445	16393083	639	4.89013	0.0158506	1.85806	0.0626591
chr21	46480115	46481367	1253	3.53458	0.0158685	2.77988	0.239889
chr1	47645768	47646592	825	4.11067	0.0158805	0.931439	0.0539162
chr14	104843124	104844268	1145	2.16714	0.0158932	1.11869	0.249078
chr14	98537169	98538065	897	-4.66071	0.0158942	0.749001	18.9451
chr21	41159060	41159600	541	5.08535	0.015904	14.7158	0.43345
chr1	39824590	39826102	1513	2.37876	0.0159091	1.48838	0.286177
chr3	13337360	13338597	1238	2.25539	0.0159102	0.739375	0.154855
chr13	20980212	20981040	829	3.84656	0.0159263	1.49319	0.103797
chr21	39633842	39634442	601	3.36247	0.0159493	1.11388	0.108301
chr3	13811217	13812636	1420	2.1822	0.0160195	0.926625	0.204173
chr12	31735953	31736759	807	4.00567	0.0160228	2.59744	0.161703
chr2	177197823	177198655	833	-2.71926	0.01605	2.79913	18.4332
chr15	75696833	75697677	845	2.12883	0.0160676	1.67081	0.382022
chr20	45781326	45781908	583	2.15099	0.0161084	5.19006	1.16859
chr1	4326474	4326910	437	4.87388	0.0161953	1.11869	0.0381528
chr11	1406537	1407090	554	4.17194	0.0162068	1.49319	0.0828391
chr5	58410497	58410839	343	4.59258	0.0162185	1.30113	0.053928
chr7	588046	589286	1241	2.13227	0.0162389	0.369688	0.0843255
chr2	168724531	168725307	777	3.88364	0.0162414	1.29631	0.0878248
chr5	73706861	73707495	635	4.17184	0.0162744	2.23256	0.123867
chr11	69083986	69084334	349	4.49871	0.0162956	1.30113	0.0575537
chr2	235267121	235268237	1117	4.29459	0.0163104	2.23738	0.114009
chr21	42735155	42735611	457	4.77414	0.016319	1.86288	0.0680807
chr8	61029791	61030603	813	-4.67589	0.0163499	0.556938	14.2361
chr3	186842100	186842773	674	-2.29677	0.0163542	0.931439	4.57668
chr3	142931266	142931852	587	-2.08123	0.0163596	2.59263	10.9712
chr15	84921996	84923004	1009	2.52334	0.0164332	2.415	0.420066
chr7	98359493	98360252	760	4.67405	0.016448	2.0405	0.0799299
chr11	67516055	67517055	1001	2.19363	0.0164607	2.41982	0.528974
chr17	79631226	79632120	895	3.67156	0.0164784	4.27307	0.335344
chr20	5863154	5863628	475	-3.92689	0.0164956	19.7763	300.787
chr21	46557579	46558402	824	2.3933	0.0165202	0.931439	0.177297
chr17	44352364	44352588	225	-5.14286	0.0165253	1.29631	45.7998
chr3	11545214	11545947	734	2.81237	0.0165321	2.59744	0.369774
chr14	94873254	94874756	1503	2.30232	0.0165389	0.561751	0.113888
chr9	124604122	124604863	742	4.62453	0.0165579	2.22294	0.0901169
chr8	18386893	18387925	1033	4.17136	0.0165979	0.744188	0.0413026
chr6	17278672	17279217	546	3.97238	0.0166024	0	0
chr9	132513389	132514543	1155	2.20031	0.0166154	1.67081	0.363554
chr2	61658763	61659815	1053	2.09704	0.0166331	3.35607	0.784439
chr8	52401985	52402903	919	4.32659	0.0166344	1.85325	0.0923638
chr20	35815172	35815550	379	4.05047	0.016642	0.926625	0.0559232
chr16	82383312	82384528	1217	2.25139	0.0166534	0.744188	0.156296
chr5	162625695	162626573	879	4.27039	0.0166802	2.60225	0.134844
chr20	53463366	53464364	999	2.17195	0.0166873	2.415	0.535913
chr3	52074452	52074955	504	3.90791	0.0166901	1.666	0.110988
chr21	39021146	39021638	493	3.12733	0.0167196	0.749001	0.0857159
chr2	156321565	156322489	925	-2.0399	0.016723	1.11388	4.58044
chr4	26288322	26288913	592	-4.16634	0.0167386	2.42944	43.6215
chrUn_KI270752v1	20440	20800	361	-2.78389	0.0167401	2.97675	20.501
chr3	9928206	9928537	332	3.66165	0.0167427	2.59263	0.204867
chr12	121441177	121441508	332	4.27053	0.0167463	2.22294	0.115178
chr12	71575626	71576509	884	4.34063	0.0167567	6.52007	0.321804
chr9	136318034	136318961	928	2.44124	0.0167579	5.00763	0.922033
chr17	1486830	1487196	367	2.6278	0.0168111	0.926625	0.149919
chr7	150664509	150665373	865	3.83933	0.0168216	1.48356	0.103646
chr9	127149173	127149743	571	3.33609	0.0168344	1.30113	0.128841
chr6	8351551	8352444	894	4.87457	0.0168358	2.0405	0.0695575
chr5	172509393	172510488	1096	3.06718	0.016881	0.556938	0.0664497
chr10	46298957	46300648	1692	2.10797	0.0168824	1.68044	0.389818
chr10	103444180	103445041	862	-4.2157	0.0169144	1.86288	34.6128
chr10	72067927	72068524	598	3.87341	0.0169172	0.744188	0.0507774
chr5	162621581	162622688	1108	3.3132	0.0169411	1.84844	0.185965
chr3	138449195	138450247	1053	3.22036	0.016967	0.556938	0.059756
chr2	225100877	225101349	473	-4.40445	0.0170032	2.415	51.1433
chr3	123351456	123352335	880	2.94534	0.0171209	20.2611	2.63043
chr21	44750026	44750675	650	2.41874	0.0172424	10.2603	1.91887
chr6	50343820	50344760	941	3.92868	0.0172453	1.84844	0.121382
chr12	3698176	3698706	531	4.05375	0.0172485	1.48838	0.0896218
chr15	77771703	77772321	619	2.88909	0.0172709	0.931439	0.125734
chr8	125294733	125295239	507	5.08602	0.0172843	0.744188	0.0219098
chr9	113519656	113520629	974	2.25305	0.017293	32.1488	6.74419
chr3	197339707	197340648	942	2.52705	0.0172944	1.30113	0.225736
chr8	101827873	101828529	657	3.80583	0.0173238	1.84844	0.132171
chr7	132291089	132292007	919	3.44685	0.0173319	13.7506	1.26101
chr10	130511757	130512461	705	4.39106	0.017333	8.91101	0.424702
chr14	68692838	68693580	743	3.97972	0.0173353	1.11388	0.0706029
chr2	29070533	29071078	546	4.27175	0.017367	2.03569	0.105387
chr7	137970601	137971149	549	3.12912	0.0173693	2.23256	0.255179
chr9	135755057	135755608	552	2.76969	0.017409	3.34163	0.490003
chr6	42998363	42999226	864	3.72157	0.0174097	1.30113	0.0986313
chr1	106810603	106811219	617	2.41929	0.0174238	2.96713	0.554698
chr14	67611842	67612865	1024	2.65659	0.0174379	6.8705	1.08962
chr14	70778086	70778948	863	3.87374	0.0174793	1.49319	0.10186
chr11	70536119	70536854	736	3.1908	0.0175076	12.0943	1.32451
chr9	104841480	104842156	677	4.2913	0.0175222	13.9668	0.713322
chr20	1890126	1891193	1068	4.44495	0.0175252	14.1588	0.650076
chr2	201697361	201697807	447	-4.78159	0.0175421	0.931439	25.6187
chr22	20205994	20206520	527	-2.58387	0.0175689	3.71613	22.2799
chr8	98090904	98091782	879	3.70843	0.0176215	4.83482	0.369855
chr1	151247274	151248175	902	3.22211	0.017636	0	0
chr16	87209502	87210196	695	4.77474	0.0176626	2.415	0.088222
chr7	148772284	148773042	759	3.28314	0.0176691	0.739375	0.0759526
chr7	75824159	75825242	1084	3.78382	0.0177059	1.48838	0.108061
chr20	13846530	13847263	734	3.44949	0.0177125	2.80394	0.256666
chr20	44900029	44901119	1091	2.67548	0.0177138	0.749001	0.117242
chr1	29455003	29455499	497	-3.90379	0.0177151	0.931439	13.9416
chr22	50482753	50483565	813	3.25297	0.0177326	1.30113	0.136482
chr4	2273550	2274635	1086	2.11774	0.0178157	2.22775	0.513292
chr1	26121892	26122355	464	-3.46396	0.017822	4.27307	47.1516
chr21	46397515	46397828	314	4.50116	0.0178358	0.369688	0.0163249
chr7	126690671	126692042	1372	2.72339	0.017851	8.92063	1.35075
chr20	63043688	63044386	699	4.64652	0.0178693	1.11869	0.0446651
chr9	127690983	127692134	1152	2.29281	0.0178896	7.63395	1.55791
chr10	124260710	124261228	519	4.87564	0.0178987	3.54332	0.120697
chr1	157215479	157216572	1094	2.7534	0.0179107	1.84844	0.274126
chr7	87474812	87475872	1061	2.63594	0.0179748	0.18725	0.030125
chr7	128831901	128832488	588	2.97604	0.0179969	13.7651	1.74945
chr5	180356180	180357289	1110	2.24207	0.0180077	13.0064	2.74934
chr18	79735289	79735930	642	4.44532	0.0180159	0.18725	0.00859502
chrUn_KI270752v1	6	352	347	-2.3357	0.0180355	1.67081	8.43417
chr12	59268073	59268802	730	4.33897	0.0180374	23.6605	1.16913
chr3	5400683	5401430	748	2.62911	0.0180455	1.85806	0.300345
chr18	13394844	13395471	628	-2.90256	0.018064	33.6569	251.671
chr20	48418083	48418308	226	3.04401	0.0180711	1.30594	0.158338
chr2	74289995	74290318	324	4.44537	0.0180789	5.21413	0.239327
chr1	31658775	31659398	624	4.16929	0.0181247	1.48838	0.0827238
chr16	1130034	1130561	528	3.60852	0.0181367	0.739375	0.0606168
chr2	29779973	29781716	1744	3.19332	0.0181423	0.931439	0.101829
chr9	136218097	136219037	941	2.25133	0.0181808	2.415	0.507225
chr2	127373581	127374168	588	4.39093	0.0182068	7.4467	0.354945
chr12	62883073	62883507	435	4.39093	0.0182253	2.415	0.115111
chr14	100522603	100523141	539	3.22375	0.0182725	3.54813	0.379798
chrX	40514363	40514881	519	-2.39015	0.0182732	2.7895	14.6229
chr1	7505370	7506443	1074	3.10231	0.0182887	0.369688	0.0430473
chr3	139266468	139267617	1150	3.16423	0.0183033	2.22775	0.248507
chr2	9150374	9151519	1146	2.61465	0.0183072	4.27788	0.698456
chr11	1443931	1444342	412	4.48818	0.0183354	1.67081	0.0744475
chr21	38980339	38981502	1164	2.34663	0.0183432	3.53369	0.694742
chr20	60377266	60377727	462	4.54013	0.0183689	0.18725	0.00804835
chr17	29079369	29080012	644	-4.41688	0.01837	0.374501	7.99953
chr15	73966343	73967103	761	2.65694	0.018372	0.18725	0.0296895
chr11	70507264	70507526	263	5.46037	0.0183948	0.744188	0.0169024
chr16	86213556	86214416	861	2.52651	0.0184289	4.26825	0.740792
chr14	92414713	92415436	724	4.5401	0.0184512	0.556938	0.0239387
chr11	2208743	2209565	823	2.2088	0.0184824	2.59744	0.561862
chr2	8864543	8865606	1064	4.77508	0.0184905	0.926625	0.0338425
chr12	124624263	124625369	1107	2.70728	0.0185075	0.18725	0.0286715
chr13	100836673	100837102	430	-4.3734	0.0185097	1.30113	26.9677
chr15	63089311	63089745	435	4.08365	0.0185131	1.48838	0.0877834
chr1	22587252	22588056	805	2.93206	0.0185429	7.81157	1.02353
chr7	141266394	141267644	1251	3.63657	0.0185524	5.21413	0.419242
chr4	25857412	25857750	339	-4.63657	0.0185602	0.739375	18.3913
chr3	184908285	184908901	617	4.90416	0.0185746	0.744188	0.0248534
chr9	131251416	131252563	1148	2.30854	0.0185756	2.7895	0.563101
chr1	205651947	205652521	575	4.77511	0.0185779	4.10026	0.149748
chr9	114229967	114230658	692	2.78986	0.018594	0	0
chr6	170063645	170064310	666	3.95659	0.0186634	27.6837	1.78309
chr17	80193197	80194047	851	2.56852	0.0186773	0.931439	0.15702
chr14	104387416	104387923	508	2.69828	0.018692	3.35125	0.51635
chr9	79521204	79521639	436	5.30597	0.0187292	0.369688	0.00934498
chr11	65808949	65809349	401	4.80836	0.0187375	0.931439	0.0332424
chr5	53246087	53246567	481	3.96999	0.0187411	0.556938	0.0355404
chr11	46724179	46724571	393	4.55996	0.0187432	0.556938	0.0236114
chr1	193376780	193377142	363	4.33814	0.0187457	1.10906	0.0548334
chr20	24459783	24460417	635	3.77869	0.0187639	4.64275	0.338281
chr8	141529736	141530391	656	3.1994	0.0187652	0.18725	0.0203848
chr11	13182820	13183599	780	4.44586	0.0187728	0.749001	0.0343673
chr7	129188052	129188766	715	3.52437	0.0187777	0.926625	0.080531
chr19	3525925	3526336	412	4.06756	0.0187896	0.744188	0.0443839
chr10	46240755	46241607	853	4.59332	0.0188242	16.958	0.702502
chr9	113398196	113398491	296	3.96989	0.0188319	0.374501	0.0238999
chr3	14330113	14330927	815	3.01541	0.0188343	0.374501	0.0463153
chr12	109760025	109760327	303	4.77521	0.0188369	0.556938	0.0203388
chr20	51842298	51842763	466	2.12803	0.0188674	0	0
chr3	110198824	110199647	824	3.71239	0.0188778	1.49319	0.113913
chr3	93761685	93763013	1329	2.17233	0.0188878	0.744188	0.1651
chr4	1803043	1803512	470	4.12253	0.0188939	1.48838	0.085449
chr7	157508261	157508995	735	3.55772	0.0188943	1.11388	0.0945922
chr11	68661330	68661967	638	3.08594	0.0188965	0.369688	0.0435385
chr11	75282659	75283267	609	4.48757	0.018906	1.67081	0.074479
chr3	45123825	45124184	360	-3.79113	0.0189111	0.926625	12.8277
chr4	2045229	2045966	738	-2.89538	0.0189202	0	0
chr16	48091728	48092812	1085	4.39083	0.0189284	64.7684	3.08739
chr2	239864314	239865342	1029	2.79462	0.0189364	4.64757	0.669826
chr3	184386527	184387117	591	3.606	0.018948	10.0393	0.824501
chr6	39852256	39853106	851	4.16829	0.0189626	1.67081	0.0929284
chr1	21877954	21878502	549	3.75975	0.0189644	2.23738	0.165174
chr6	40677307	40678196	890	4.59335	0.0189645	0.739375	0.0306287
chr17	62927251	62927959	709	2.60017	0.0189695	0.931439	0.153612
chr15	93045363	93045786	424	4.50275	0.0189824	0.556938	0.0245665
chr2	33654306	33655239	934	3.94625	0.0190051	1.10906	0.0719478
chr6	151036251	151036913	663	3.33033	0.0190111	1.11388	0.110741
chr3	140655753	140656675	923	4.27471	0.0190673	1.48356	0.0766463
chr8	48592642	48593042	401	4.67285	0.0190885	3.72575	0.146065
chr6	40268189	40268795	607	3.94637	0.0191053	0.936252	0.0607318
chr2	99399035	99399439	405	3.19543	0.0191182	0.749001	0.0817638
chr20	33074083	33074603	521	4.67283	0.0191358	2.04531	0.080186
chr1	228256229	228257338	1110	3.09591	0.0191406	1.11388	0.130279
chr7	157054482	157055438	957	2.7922	0.0191611	0.926625	0.133773
chr20	22770313	22770776	464	4.16805	0.0191727	0.931439	0.0518141
chr1	21775849	21776402	554	-3.16398	0.0191835	2.79432	25.0454
chr3	71954509	71955288	780	4.82632	0.0191929	0.18725	0.00660016
chr2	168501876	168503186	1311	3.70907	0.0192331	1.48838	0.113807
chr11	70552662	70553316	655	3.19567	0.0192362	0.369688	0.04035
chr14	50335055	50335926	872	-2.51145	0.0192443	0.931439	5.311
chr3	123296864	123297435	572	4.12162	0.0192609	1.86288	0.107017
chr2	181876451	181877449	999	-1.90224	0.0192641	0.744188	2.78173
chr8	142381605	142382334	730	2.52168	0.019274	0.926625	0.161362
chr5	135063426	135063850	425	4.62175	0.0192783	0.374501	0.0152114
chr19	18089701	18090259	559	4.44621	0.019286	2.0405	0.093604
chr15	50805455	50806067	613	4.62172	0.0193131	1.11869	0.0454395
chr2	104863385	104864284	900	2.82051	0.0193152	0.369688	0.0523331
chr3	99877982	99878342	361	-3.99615	0.0193184	0.931439	14.8633
chr8	107588589	107589525	937	3.32261	0.0193278	2.03569	0.203473
chr8	96407986	96409096	1111	-2.11986	0.0193416	2.96231	12.8758
chr9	97773081	97774111	1031	2.81097	0.0193462	0.556938	0.0793633
chr12	71092379	71093309	931	3.6732	0.0193831	0	0
chr7	1423814	1424412	599	2.82075	0.0193946	0.18725	0.0265029
chr8	107427059	107428065	1007	2.47865	0.0194294	0.561751	0.100785
chr9	133182072	133182741	670	3.49562	0.0194307	0.556938	0.0493764
chr2	42967939	42969046	1108	2.41133	0.0194493	1.67563	0.314989
chr7	74281010	74281278	269	4.01249	0.0195067	0.931439	0.0577129
chr6	56983385	56984241	857	3.63356	0.01951	0.931439	0.0750487
chr7	149776370	149776697	328	2.40394	0.0195163	1.11388	0.210464
chr19	19748742	19749071	330	4.56134	0.0195237	1.10906	0.0469737
chr13	39770948	39771625	678	4.90375	0.0195241	1.68044	0.0561369
chr7	100936974	100937573	600	4.64776	0.0195799	1.48838	0.0593743
chr19	21482406	21483447	1042	2.43032	0.0196187	1.11388	0.206651
chr1	6510087	6510810	724	2.87302	0.0196188	4.28269	0.584592
chr20	61089626	61090431	806	2.5073	0.0196475	2.97194	0.522718
chr9	114484896	114485317	422	-2.74303	0.0196673	1.67081	11.1857
chr1	204046177	204047219	1043	3.30453	0.0196675	1.49319	0.151131
chr2	26862902	26863488	587	4.67261	0.0196793	0.936252	0.036711
chr19	55544495	55545087	593	3.5956	0.0197385	1.85806	0.153701
chr1	37638231	37639050	820	4.21946	0.0197617	0.749001	0.0402066
chr6	22892237	22892885	649	4.21947	0.0197637	2.23256	0.119844
chr11	46374600	46375543	944	2.10334	0.0197671	1.30113	0.302797
chr1	201667803	201668791	989	2.4815	0.0197744	0.369688	0.0661956
chr1	27359997	27361085	1089	3.52484	0.0198464	0.556938	0.0483866
chr9	134530464	134530899	436	4.67254	0.0198636	1.11388	0.0436778
chr1	149944634	149945521	888	2.56985	0.019897	2.41982	0.40755
chr1	54813907	54814450	544	4.59357	0.0199103	0.744188	0.0308233
chr2	131073860	131074907	1048	2.31235	0.0199202	1.29631	0.260989
chr13	23383772	23384525	754	4.3907	0.0199246	0.561751	0.02678
chr5	1171351	1171730	380	2.43228	0.0199259	0.556938	0.103185
chr11	71197599	71198251	653	3.09924	0.0199364	0.556938	0.0649895
chr1	17852427	17853551	1125	3.68717	0.0199935	2.03569	0.158038
chr1	153420084	153420796	713	4.59362	0.0200849	0.556938	0.023067
chr7	127938379	127938957	579	3.59642	0.0200875	0.561751	0.0464424
chr3	61795774	61796249	476	3.18974	0.020119	0	0
chr16	28058964	28059848	885	2.11906	0.0201308	0	0
chr10	76352295	76352668	374	-4.01055	0.0201897	1.1235	18.1079
chr10	31063795	31064394	600	4.82695	0.0202104	0.926625	0.0326473
chr22	32122943	32123334	392	4.98695	0.0202278	0.931439	0.029372
chr15	74174621	74174918	298	4.6724	0.0202479	0.18725	0.00734329
chr13	30445435	30446428	994	2.17449	0.02028	1.29631	0.28716
chr7	76067601	76068046	446	2.77452	0.0202954	0.561751	0.0820978
chr19	32239847	32240518	672	4.50439	0.0203015	1.30113	0.0573277
chr7	157580338	157581161	824	2.78752	0.0203151	0.744188	0.107785
chr5	179286357	179287396	1040	2.32429	0.0203761	0.18725	0.0373888
chr4	116001235	116001674	440	-2.67788	0.0203836	0.744188	4.76218
chr3	147410477	147411036	560	4.27667	0.0203844	0.374501	0.0193217
chr9	130544307	130544631	325	4.48612	0.0203971	0.369688	0.016496
chr6	5143636	5143979	344	3.0374	0.0204254	0.556938	0.0678357
chr5	135420337	135421069	733	-4.55649	0.0204396	0.744188	17.5114
chr15	100048550	100049193	644	4.59371	0.0205177	3.913	0.162056
chr13	98775941	98776671	731	-2.67529	0.0205645	1.48838	9.50727
chr1	2053475	2053746	272	4.39062	0.0205655	0.18725	0.00892718
chr9	114957509	114958305	797	3.85464	0.0205659	0.936252	0.0647186
chr9	136134044	136134585	542	2.31415	0.020578	0.18725	0.0376526
chr5	169706564	169707673	1110	2.21077	0.0206139	0.374501	0.0808991
chr1	15758610	15759728	1119	2.1935	0.0206476	1.67081	0.365274
chr1	22540959	22541750	792	3.62622	0.0206791	0.739375	0.0598774
chr3	12944852	12945443	592	2.16439	0.0206806	0.744188	0.166011
chr17	58047511	58047995	485	3.71357	0.0207151	0.374501	0.0285468
chr19	45451420	45451723	304	2.15252	0.0207271	1.85806	0.417916
chr14	64768964	64769688	725	2.12836	0.0207566	0.926625	0.211936
chr12	123398652	123399739	1088	2.64965	0.0207959	0	0
chr1	110105288	110105564	277	4.67219	0.0208041	1.67563	0.0657214
chr7	156827987	156828370	384	-5.07614	0.0208226	0.18725	6.31674
chr15	70585077	70585687	611	2.6396	0.020852	1.30594	0.209568
chr5	139839244	139840178	935	2.99071	0.020861	1.30113	0.163691
chr16	89933111	89933642	532	3.59848	0.0208678	0.926625	0.0764986
chr17	47927599	47928172	574	3.80439	0.0208715	1.30113	0.0931286
chr16	89772920	89773496	577	3.87565	0.0209453	0.374501	0.0255133
chr12	65505408	65506391	984	3.3284	0.0209502	0.18725	0.0186412
chr1	44841599	44842216	618	4.67214	0.0209523	0.369688	0.0145004
chr1	229111012	229111739	728	4.01465	0.0209652	0.374501	0.0231698
chr16	84419370	84419922	553	3.78022	0.0209783	0.369688	0.0269076
chr6	37369713	37370431	719	4.40088	0.0209808	0.374501	0.0177278
chr1	101004069	101004486	418	-2.01107	0.0209876	0.744188	2.99968
chr11	70016773	70017373	601	3.76403	0.0209917	0.744188	0.0547767
chr7	65989424	65990096	673	4.84207	0.0210103	2.05494	0.0716459
chr13	98751820	98752747	928	-4.07742	0.0210147	1.30594	22.047
chr3	183951429	183952069	641	4.27755	0.0210296	2.22775	0.114867
chr12	130459469	130459997	529	4.21985	0.0210374	1.30113	0.0698262
chr7	2036290	2037642	1353	2.22821	0.0210448	0.18725	0.0399637
chr2	31382601	31383080	480	4.27759	0.0210573	1.30113	0.0670867
chr5	73824355	73824909	555	4.62021	0.0210913	0.556938	0.0226457
chr2	120641311	120641685	375	4.82746	0.0211066	0.744188	0.0262103
chr15	77724477	77725408	932	2.73842	0.0211135	0.556938	0.0834566
chr17	57630440	57630919	480	3.18343	0.021121	0	0
chr8	56441612	56442003	392	-5.30468	0.0211789	0.561751	22.203
chr1	5991320	5991780	461	-3.71614	0.0211794	0.18725	2.4609
chr14	75163808	75164580	773	-4.52811	0.0211829	1.48356	34.2296
chr3	13523521	13523979	459	3.96428	0.0211902	1.48356	0.0950471
chr17	78855080	78855427	348	4.59386	0.0211943	0.744188	0.0308173
chr12	133234363	133234900	538	4.79255	0.0212002	0.931439	0.0336088
chr9	130650368	130651436	1069	2.4239	0.0212073	3.164	0.589616
chr5	14334416	14335034	619	5.03447	0.0212142	0.374501	0.0114268
chr3	39269696	39270207	512	4.72412	0.0212212	0	0
chr10	6157279	6158098	820	3.39709	0.0212397	0.561751	0.0533234
chr14	32004336	32004679	344	3.96774	0.0212601	1.11388	0.0711915
chr19	46685384	46685994	611	4.74277	0.0212745	0.369688	0.0138076
chr12	113802036	113802641	606	4.44744	0.0213167	0.926625	0.042471
chr10	70936791	70938118	1328	2.41496	0.0213303	0.739375	0.13864
chr14	34678872	34680227	1356	2.77049	0.0213423	0.369688	0.0541793
chr15	77601627	77602362	736	3.74382	0.0213496	1.10906	0.0827852
chr10	72044293	72044984	692	3.20504	0.0213748	0.744188	0.080699
chr22	45605248	45605758	511	-3.78206	0.0214045	2.61669	35.9969
chr13	20221404	20222020	617	4.39052	0.0214567	0.556938	0.026554
chr1	240092022	240092316	295	4.44754	0.0215097	4.65238	0.213222
chr19	16951647	16952331	685	4.43225	0.0215552	2.97675	0.13788
chr3	21718148	21718582	435	3.77135	0.0215696	2.59744	0.19022
chr12	67102560	67103620	1061	4.44757	0.0215721	0.749001	0.0343265
chr9	133050596	133050945	350	4.12517	0.0215841	2.59744	0.148849
chr8	109416503	109416838	336	5.08766	0.0215882	2.97675	0.0875398
chr17	49945989	49946414	426	4.11564	0.0215979	1.1235	0.0648101
chr4	143828993	143829685	693	3.96747	0.0216023	2.98157	0.190597
chr10	119378603	119379605	1003	3.17586	0.0216077	1.85806	0.205605
chr2	238435102	238436203	1102	4.16553	0.021613	0	0
chr1	177891223	177892153	931	3.56166	0.0216586	3.5385	0.299677
chr11	83035210	83035628	419	4.77617	0.0216754	8.56057	0.312416
chr8	143251989	143252926	938	2.22846	0.0216905	8.36851	1.78573
chr2	98669767	98670303	537	4.79237	0.021707	2.22775	0.0803932
chr14	22422227	22423090	864	3.59992	0.0217159	1.11388	0.0918654
chr2	127623889	127624178	290	4.59396	0.021728	1.67563	0.0693836
chr16	72016399	72016775	377	4.84201	0.0217376	0.374501	0.0130576
chr17	29215687	29216054	368	4.70412	0.0217901	0.561751	0.0215507
chr11	2147547	2148540	994	3.14049	0.0218125	0.931439	0.105627
chr7	1985384	1986651	1268	2.35115	0.0218183	1.67563	0.328405
chr19	58338246	58338774	529	4.56785	0.0218268	1.1235	0.0473712
chr8	118644294	118645323	1030	4.33992	0.0218303	6.12632	0.30252
chr22	38297984	38299211	1228	2.29721	0.0218342	3.71131	0.75509
chr21	46007248	46008026	779	2.59947	0.0218404	0.556938	0.0918945
chr17	68370030	68370903	874	2.8325	0.0219116	0.18725	0.0262878
chr1	156877465	156878115	651	2.8025	0.0219747	0.739375	0.105981
chr21	46596145	46596987	843	2.27795	0.0219788	2.97194	0.612786
chr20	42095378	42095980	603	4.22011	0.0219912	1.49319	0.0801191
chr15	79016139	79017327	1189	2.28591	0.0219932	0.556938	0.114203
chr1	20108908	20109875	968	2.47946	0.0220022	0.556938	0.099865
chr5	82352302	82352725	424	4.44781	0.022007	0.744188	0.0341004
chr11	80142013	80142647	635	4.67179	0.0220129	1.48838	0.0583936
chrX	154140512	154141328	817	3.56422	0.022017	1.10906	0.0937604
chr17	57379952	57381040	1089	2.38799	0.0220355	0.369688	0.0706284
chr6	33876538	33877156	619	4.37993	0.0220687	0.18725	0.0089936
chr12	52527439	52528054	616	-3.16043	0.0221594	1.30113	11.6333
chr11	61329933	61330234	302	4.43132	0.0221726	0.18725	0.00867886
chr9	34398355	34399164	810	3.60428	0.0221925	1.85325	0.152383
chr15	52748707	52749364	658	3.52587	0.0222056	0.374501	0.0325131
chr9	133662087	133662549	463	4.16499	0.0222131	0.926625	0.0516556
chr11	130772522	130773056	535	3.70588	0.0222139	0.556938	0.0426802
chr7	424074	424539	466	3.04205	0.0222182	0.739375	0.0897672
chr16	89988650	89989347	698	3.56341	0.022224	0.18725	0.015839
chr22	26714546	26715402	857	4.77633	0.0222297	0.369688	0.0134901
chr11	128709364	128709885	522	3.70576	0.0222466	0.931439	0.0713852
chr1	208207373	208208195	823	2.62152	0.0222729	0.561751	0.0912824
chrX	47629855	47630773	919	-3.84977	0.0222767	3.52406	50.8088
chr20	57584333	57584563	231	3.17041	0.0222877	0.739375	0.0821253
chr12	30885388	30885943	556	3.67734	0.0223174	5.20932	0.407184
chr11	126483865	126484618	754	4.07337	0.0223559	0	0
chrX	153578896	153579218	323	4.39042	0.022356	0.374501	0.0178568
chr19	50507281	50507764	484	4.16483	0.0223921	1.67081	0.0931513
chr17	9939162	9939904	743	3.64007	0.0223922	2.60225	0.208727
chr6	18277155	18277777	623	3.1101	0.0223969	0.18725	0.0216864
chr16	1162593	1163304	712	2.11583	0.0224485	1.30113	0.300185
chr20	45843345	45844069	725	2.54567	0.0224491	0.18725	0.0320701
chr11	3668875	3669561	687	3.75553	0.0224886	0.744188	0.0551006
chr5	137310176	137310767	592	3.96681	0.0224967	0.561751	0.0359265
chr5	155082451	155082965	515	-4.23055	0.0225031	3.35125	62.9115
chr3	66729593	66730250	658	-1.89064	0.022507	1.1235	4.16595
chr11	76707453	76707930	478	4.03625	0.022517	0.18725	0.0114127
chr6	150258357	150259125	769	4.72415	0.0226004	0.926625	0.0350585
chr6	167269802	167271631	1830	2.55654	0.0226049	0	0
chr20	41102033	41102683	651	3.92928	0.0226455	0.926625	0.0608237
chr1	156551420	156552329	910	2.70237	0.0226633	1.11388	0.171136
chr3	193981285	193982666	1382	2.31283	0.0227111	1.1235	0.226122
chr3	31150964	31152426	1463	3.14512	0.0227413	0.369688	0.0417889
chr10	17213690	17214302	613	-1.91251	0.0227464	1.11869	4.21145
chr8	99232632	99233536	905	3.60406	0.0227604	0.369688	0.0304022
chr8	119515812	119516490	679	3.83675	0.0227891	1.11869	0.0782948
chr12	3323139	3324488	1350	2.9054	0.0227953	0.561751	0.0749777
chr6	34083695	34084744	1050	2.58526	0.0227988	0	0
chr22	19519521	19520107	587	4.39038	0.0228075	0.556938	0.0265565
chr13	32373585	32374321	737	3.71648	0.0228094	0.561751	0.0427338
chr4	7107331	7107932	602	3.43287	0.0228123	1.11869	0.103589
chr2	236691871	236692345	475	-2.41832	0.0228171	0.556938	2.9771
chr9	36168635	36169458	824	3.7165	0.0228261	1.48356	0.112857
chr20	41348384	41348755	372	2.46503	0.0228459	1.31075	0.237395
chr12	50627393	50628274	882	3.18164	0.022856	0.369688	0.0407442
chr21	32245185	32246230	1046	-2.12698	0.0228634	1.1235	4.90748
chr4	7513340	7514509	1170	2.4325	0.0228784	1.67563	0.3104
chr4	183636453	183636881	429	-2.18474	0.022892	2.23738	10.1721
chr7	159105678	159106261	584	2.89424	0.0229071	2.40538	0.323541
chr20	59340220	59340626	407	2.52157	0.0229075	2.415	0.420581
chr12	50517292	50518807	1516	2.1167	0.0229157	0.374501	0.08635
chr20	62203787	62204087	301	2.78426	0.0229177	0.739375	0.10733
chr5	115461537	115462129	593	3.78594	0.022925	0.369688	0.0268011
chr14	67450961	67451677	717	3.70626	0.0229347	1.11388	0.0853378
chr5	152404435	152404817	383	4.64974	0.0229555	1.11388	0.0443737
chr5	19852082	19852611	530	-2.15456	0.0229722	0	0
chr6	36060042	36060640	599	4.33399	0.0230261	1.29631	0.0642758
chr11	76328653	76329539	887	2.39237	0.0230372	0.374501	0.0713308
chr14	90844919	90845606	688	3.78251	0.0230392	1.67563	0.121767
chr6	39855599	39856893	1295	2.09438	0.0230466	2.59744	0.60824
chr2	70677082	70678324	1243	3.21929	0.0230513	0.374501	0.0402115
chr7	149712940	149713707	768	2.54772	0.0230618	1.11388	0.190501
chr8	105726572	105727549	978	3.14707	0.0230634	0.561751	0.0634133
chr8	30254563	30255365	803	3.25022	0.0230698	0.18725	0.0196793
chr5	168759498	168760208	711	-4.44706	0.0230714	0.744188	16.2323
chr1	17095868	17096560	693	4.37775	0.0230748	1.30594	0.0628189
chr1	171658702	171659271	570	4.67145	0.023094	1.30113	0.0510591
chr5	79069722	79070524	803	4.27977	0.0231112	10.0441	0.517099
chr9	136169047	136169724	678	2.53089	0.0231473	2.05013	0.354738
chr20	61427540	61427917	378	4.2204	0.0231483	0.556938	0.0298772
chr8	143298307	143298734	428	3.67482	0.0231655	1.67563	0.131204
chr3	13808863	13809641	779	3.00094	0.0231683	0.18725	0.0233911
chr7	51249750	51250321	572	4.33387	0.0231763	0.374501	0.0185707
chr7	155516348	155516879	532	3.8768	0.0231927	0.374501	0.025493
chr3	8218936	8219400	465	-2.23873	0.0232062	5.01725	23.6805
chr7	76275881	76276464	584	4.70526	0.0232113	0.561751	0.0215337
chr12	49414561	49415146	586	4.72416	0.0232317	0.369688	0.0139869
chr16	17935189	17936856	1668	3.11175	0.0232337	0.374501	0.0433233
chr12	124411424	124412083	660	2.28583	0.0232338	0.556938	0.11421
chr9	87966714	87967754	1041	3.01315	0.0232419	1.29631	0.160569
chr6	44863867	44864773	907	4.8419	0.0232514	0.374501	0.0130586
chr10	127940257	127940720	464	4.39033	0.0232529	0	0
chr19	43712997	43713576	580	4.67139	0.0232735	0.561751	0.0220452
chr2	43269795	43270056	262	4.11202	0.0232745	0	0
chr2	141020837	141021489	653	4.01753	0.02329	1.48356	0.0916029
chr8	85447540	85448247	708	3.5296	0.0233087	0.931439	0.0806564
chr5	71891819	71892365	547	-2.06902	0.023328	0	0
chr8	116574839	116575257	419	3.78981	0.0233366	0.744188	0.0538067
chr6	141667603	141668382	780	4.44848	0.0233486	0.556938	0.0255083
chr6	18242227	18242761	535	3.92212	0.0233781	0.374501	0.0247045
chr10	116768762	116769513	752	3.21163	0.0234051	1.11869	0.120757
chr9	117214342	117214941	600	4.39032	0.0234216	1.11869	0.0533448
chr2	126850923	126851811	889	3.52641	0.023424	0.374501	0.0325011
chr6	4299514	4300105	592	3.30861	0.0234268	0.744188	0.0751089
chr16	71396565	71397240	676	4.07634	0.0234422	0.18725	0.0111
chr2	8657026	8657700	675	3.61384	0.0234462	0.926625	0.0756887
chr15	90202812	90203559	748	3.60381	0.0234777	0.374501	0.0308034
chr1	202327697	202328736	1040	2.6288	0.0234845	1.1235	0.181646
chr12	132392375	132392798	424	4.7413	0.0235035	3.35607	0.125475
chr10	97789258	97790390	1133	3.39896	0.0235218	0.556938	0.0527979
chr10	84221759	84222763	1005	2.18229	0.0235308	0.374501	0.082512
chr1	179005907	179006257	351	5.26415	0.0235592	1.10906	0.0288595
chr5	74213786	74214731	946	-1.9001	0.0235844	1.67563	6.25409
chr10	129332406	129332952	547	-4.406	0.0235877	0.374501	7.93947
chr18	23666451	23667711	1261	2.14945	0.0236393	0.561751	0.126618
chr2	1819016	1819675	660	3.2594	0.0236532	0.926625	0.0967672
chr14	67454739	67455205	467	3.80372	0.0236653	0.926625	0.0663546
chr10	69241598	69242276	679	2.97663	0.0236708	1.85325	0.23544
chr8	124709728	124710583	856	2.22679	0.0236873	0.374501	0.0800056
chr18	10561470	10562672	1203	3.04578	0.0237215	2.415	0.292447
chr1	43929471	43930046	576	2.22858	0.0237231	2.23738	0.477388
chr12	129017370	129018348	979	4.26902	0.0237454	0.561751	0.0291368
chr16	85332671	85333359	689	2.28331	0.0237614	0.931439	0.191342
chr1	39922185	39922524	340	4.39028	0.0237704	0.931439	0.0444168
chr7	149232659	149233272	614	3.17855	0.02378	0.374501	0.0413631
chr12	125589469	125590277	809	4.50793	0.0237875	1.30113	0.0571869
chr1	12676813	12677484	672	4.82881	0.0237984	2.0405	0.0717991
chr8	142821393	142821778	386	3.68704	0.0237985	2.23738	0.173712
chr15	100330818	100331179	362	4.82882	0.023806	0.369688	0.0130081
chr20	19815540	19815938	399	3.75177	0.0238357	0.369688	0.0274434
chr21	38955504	38956161	658	3.56433	0.0238398	0.369688	0.0312511
chr7	100164111	100164549	439	4.28091	0.0238797	0.18725	0.00963254
chr17	5765879	5766439	561	4.59436	0.0238965	1.85325	0.0767174
chr12	11812305	11813128	824	4.3333	0.0238973	0.18725	0.009289
chr17	74807008	74807884	877	3.1454	0.0239067	0	0
chr4	179663271	179664684	1414	3.96584	0.0239179	0.744188	0.0476262
chr7	139438924	139439926	1003	2.49612	0.0239444	0	0
chr21	33879730	33881204	1475	2.41401	0.0239507	1.11388	0.209
chr2	1816331	1816755	425	4.48322	0.0239665	0.18725	0.00837217
chr17	80443470	80444435	966	2.62788	0.0239682	0.744188	0.120396
chr7	2903555	2903894	340	-4.40684	0.0239784	0.18725	3.97204
chr3	11147382	11147815	434	4.1106	0.023984	1.29631	0.0750404
chr6	40671092	40671710	619	3.02981	0.0239894	0.561751	0.0687829
chr12	111166435	111167484	1050	2.93781	0.0239958	0.926625	0.12093
chr14	96599434	96600091	658	2.60777	0.0240212	1.30113	0.213452
chr8	127714729	127715616	888	2.39072	0.0240238	3.89857	0.743406
chr17	59667618	59668213	596	3.35561	0.0240486	0.556938	0.0544085
chr2	108928930	108929899	970	2.27182	0.0240632	5.77107	1.19501
chr21	45536468	45537023	556	2.68488	0.0240692	0.744188	0.115732
chr17	51088445	51088987	543	4.89152	0.024089	1.85325	0.0624365
chr16	17246223	17247099	877	3.64554	0.0240914	2.04531	0.163434
chr9	109356015	109356676	662	3.17957	0.0241563	2.41019	0.266015
chr2	3046317	3047443	1127	2.94803	0.0241689	3.53369	0.457914
chr7	64888918	64889708	791	3.47453	0.0241732	12.6849	1.14116
chr20	46628096	46629047	952	3.58151	0.0241873	0.18725	0.0156416
chr8	103138202	103138761	560	2.94798	0.0241897	2.415	0.312959
chr15	101410923	101412004	1082	2.65871	0.0242004	1.29631	0.205286
chr17	20987861	20988958	1098	2.58989	0.0242065	0.556938	0.0925065
chr6	51453758	51454218	461	-2.09556	0.0242226	0.936252	4.00146
chr14	100295779	100296391	613	2.75716	0.0242283	0.18725	0.0276971
chr5	6150811	6152252	1442	2.24938	0.024231	6.13113	1.28947
chr2	237218036	237218585	550	4.50833	0.0242387	0.18725	0.00822773
chr9	134564631	134565317	687	3.20669	0.0242489	0.556938	0.0603248
chr9	104525822	104526693	872	4.65038	0.0242494	0.18725	0.00745621
chr1	3443421	3445180	1760	2.32787	0.0242576	0.556938	0.11093
chr11	78391463	78391915	453	4.67111	0.0242676	2.415	0.0947926
chr14	65110310	65110981	672	4.22066	0.0242805	1.48838	0.0798302
chr5	150244156	150244542	387	-4.756	0.0242886	0.744188	20.1086
chr1	17637740	17638300	561	4.48299	0.0242914	18.4271	0.824028
chr5	72600350	72600638	289	-3.87899	0.0242916	1.30113	19.1431
chr7	4208567	4209718	1152	2.29416	0.0243531	0	0
chr12	130611777	130612866	1090	3.08085	0.0243532	0.556938	0.0658233
chr20	7806854	7807453	600	4.48291	0.0244189	1.68044	0.0751509
chr3	158709561	158710104	544	3.72186	0.0244462	2.23256	0.169205
chr17	81129988	81130291	304	4.10968	0.0244633	1.67563	0.0970598
chr10	133183672	133184361	690	3.52687	0.0244748	0.369688	0.0320732
chr2	118951550	118952834	1285	3.51748	0.0245271	2.42463	0.211728
chr8	99857604	99858213	610	3.1097	0.0245389	0.739375	0.0856549
chr12	98856735	98857284	550	4.28159	0.0245512	2.41019	0.123926
chr7	132163354	132164121	768	3.45697	0.0245569	2.79432	0.254462
chr12	51890070	51890907	838	2.0912	0.0245805	2.99601	0.703119
chr1	222914661	222915694	1034	3.96542	0.0245902	0.931439	0.0596272
chr9	91769526	91770044	519	4.39021	0.0246041	1.11388	0.0531194
chr3	123870012	123870552	541	3.28054	0.0246282	0.926625	0.0953594
chr9	124491057	124491521	465	4.07929	0.0246368	0.18725	0.0110773
chr3	125436447	125437150	704	3.78252	0.0246436	0.561751	0.0408218
chr20	25038346	25039189	844	2.31182	0.0246707	8.17163	1.64582
chr15	39627854	39628410	557	-2.1381	0.0247031	0.744188	3.27577
chr6	88780696	88781149	454	-2.42341	0.0247097	1.29631	6.95389
chr10	11448199	11448692	494	-4.96639	0.0247186	3.89857	121.881
chr4	111153834	111154605	772	4.22076	0.0247196	0.374501	0.0200853
chr3	127556445	127557336	892	2.2162	0.0247554	0.926625	0.199417
chr9	132949567	132949903	337	4.2818	0.0247612	4.27307	0.21968
chrX	113260937	113261922	986	4.16289	0.024809	1.30594	0.0729068
chr6	3351889	3352391	503	4.34517	0.0248345	0.749001	0.0368517
chr6	3617720	3618797	1078	3.3666	0.0248355	1.30113	0.126146
chr9	95519762	95520734	973	3.52334	0.0248386	5.94869	0.517356
chr10	102898884	102899666	783	-4.45528	0.0248499	2.03569	44.6563
chr16	86210481	86210749	269	4.94074	0.024861	0.926625	0.0301713
chr3	11735745	11735972	228	4.39019	0.0248801	5.21894	0.248889
chr8	97497885	97498698	814	3.78267	0.0248915	1.85806	0.13501
chr3	50470018	50470807	790	3.46599	0.0248973	0.556938	0.050401
chr5	31798788	31799970	1183	2.14126	0.0249035	0	0
chr1	108897970	108898503	534	-2.47005	0.0249605	2.05013	11.359
chr5	37821997	37822551	555	4.28199	0.0249624	2.97675	0.153015
chr5	66538540	66538830	291	4.22081	0.0249686	0.18725	0.0100423
chr6	82930944	82932152	1209	3.26799	0.0249697	1.86288	0.193385
chr3	134312497	134312710	214	-3.94609	0.0250069	3.35607	51.7275
chr7	43197414	43197787	374	5.13331	0.0250101	1.11869	0.0318734
chr17	19980050	19980489	440	4.34546	0.0250236	1.666	0.0819524
chr12	53069961	53070409	449	3.1907	0.0250367	0.556938	0.0609972
chr7	151134729	151135219	491	3.09158	0.0250423	6.32801	0.742348
chr10	76548799	76549470	672	4.53832	0.0250444	2.59744	0.111783
chr22	48820918	48821907	990	4.53832	0.0250537	0.926625	0.0398781
chr1	205074047	205074848	802	2.31741	0.0250678	0	0
chr9	130948107	130948723	617	2.41408	0.0250789	0.561751	0.105398
chr16	11514073	11515041	969	2.11747	0.0250818	0.744188	0.171499
chr20	22407690	22408133	444	4.44926	0.0251094	0.561751	0.0257147
chr3	124271109	124271806	698	4.70663	0.0251292	0.926625	0.0354867
chr8	109601032	109601783	752	2.29813	0.0251449	1.48838	0.302627
chr8	77147395	77147778	384	-3.85789	0.0251633	0.744188	10.79
chr21	39026712	39027513	802	3.15674	0.0251673	1.67081	0.18735
chr2	28521807	28522543	737	3.60621	0.0252052	1.30113	0.106842
chr15	72266212	72267203	992	4.33233	0.0252083	4.83963	0.240243
chr6	38509834	38510532	699	2.79234	0.0252103	1.30594	0.188515
chr8	97759753	97760447	695	3.05262	0.0252294	1.30113	0.156816
chr3	171874189	171874733	545	3.69619	0.0252446	1.85806	0.143349
chr9	38487492	38488774	1283	3.84047	0.0252986	0.739375	0.0516142
chr1	204434186	204434727	542	4.44934	0.0252997	0.561751	0.0257134
chr1	27000607	27001103	497	4.22089	0.0253201	1.67081	0.0896014
chr8	104655014	104655922	909	2.2396	0.0253714	0.744188	0.157578
chr4	151418028	151418912	885	2.68138	0.0254063	2.77988	0.433359
chr16	79406294	79407087	794	3.04651	0.0254134	0.744188	0.0900725
chr2	240766799	240767386	588	2.11378	0.0254202	1.48838	0.343876
chr11	69745434	69746512	1079	2.11918	0.0254605	0.18725	0.0431007
chr20	3229402	3230097	696	3.45592	0.0254735	0.18725	0.0170642
chr12	133184709	133185879	1171	2.89825	0.0254774	1.67081	0.224114
chr14	69054022	69054284	263	5.03674	0.0254907	0.18725	0.00570442
chr9	94191647	94192864	1218	2.79108	0.0255195	1.48838	0.215037
chr9	130651532	130652304	773	2.87842	0.0255471	0.18725	0.0254642
chr12	12881465	12881892	428	3.75834	0.0255779	2.24219	0.165691
chr1	18988846	18989697	852	2.41335	0.0255807	1.11388	0.209096
chr2	96968431	96968763	333	4.44946	0.0255863	3.52888	0.161516
chr6	42916251	42916652	402	4.28259	0.0255948	2.42463	0.124582
chr1	17866219	17866879	661	3.91687	0.0255949	0.931439	0.0616679
chr14	71267004	71267449	446	3.91687	0.0255967	1.10906	0.0734279
chr8	79612369	79613548	1180	2.47516	0.0256068	2.79913	0.503414
chr12	34334323	34334757	435	3.45576	0.025621	1.85806	0.169345
chr19	2756905	2757855	951	4.0199	0.0256212	0.374501	0.0230857
chr16	67754460	67754811	352	4.67074	0.0256335	1.30113	0.0510844
chr11	78879079	78880075	997	2.29963	0.025638	0.556938	0.113123
chr11	103611606	103612140	535	-2.05549	0.0256546	1.29631	5.38856
chr6	125045890	125046563	674	-1.97037	0.0256696	5.75182	22.5396
chr5	53302932	53303538	607	3.80815	0.0256703	3.913	0.279347
chr12	110355043	110355396	354	-2.46683	0.0257111	1.30594	7.21959
chr14	105217824	105218703	880	2.27075	0.0257327	0.749001	0.15521
chr5	150229349	150229923	575	3.52742	0.025759	0.556938	0.0483
chr10	10792418	10793029	612	-3.7692	0.0257962	0.926625	12.6342
chr1	234659545	234659872	328	3.72199	0.0258037	2.0405	0.154634
chr6	53010093	53011293	1201	3.35333	0.0258147	0.744188	0.0728163
chr19	55311597	55311962	366	4.48197	0.0258203	1.86769	0.083579
chr12	29086453	29087401	949	4.16217	0.0258263	0.744188	0.0415667
chr5	178537724	178538382	659	3.86132	0.0258455	0.18725	0.012884
chr6	154301182	154301827	646	4.61698	0.0258464	2.78469	0.113482
chr2	118851622	118852233	612	4.27557	0.0258643	5.39657	0.27864
chr9	78319972	78321328	1357	2.18933	0.02589	2.05013	0.449498
chr17	2909062	2909511	450	3.68019	0.0259093	6.32319	0.493275
chr11	9001768	9002148	381	3.69426	0.0259337	2.97675	0.229964
chr18	35692855	35693357	503	-3.58823	0.0259472	3.90819	47.0046
chr15	80486759	80487738	980	2.85364	0.0259505	0.369688	0.0511452
chr12	79357337	79358328	992	4.48188	0.0259565	3.5385	0.158358
chr6	3516171	3516472	302	3.96462	0.0259628	38.7026	2.47897
chr10	100614976	100615679	704	4.44962	0.0259649	1.67081	0.0764645
chr5	16700878	16701753	876	3.08706	0.0259849	2.23256	0.262728
chr19	30168233	30168824	592	3.25487	0.0260038	0.369688	0.0387277
chrX	45517462	45517776	315	-3.94336	0.0260127	2.04531	31.4651
chr1	91099729	91100440	712	-3.6925	0.0260273	2.04531	26.4431
chr14	53670563	53671127	565	2.68375	0.0260453	0	0
chr14	76080256	76080954	699	4.48182	0.0260571	0.739375	0.0330904
chr14	76509183	76509747	565	3.21955	0.0260692	0.556938	0.0597894
chr21	41107297	41108110	814	2.71667	0.0260791	0.561751	0.0854567
chr15	80502111	80503095	985	2.25538	0.0260799	0.561751	0.117654
chr10	85950641	85951253	613	4.28306	0.0261145	5.38213	0.276455
chr4	122702945	122703548	604	2.91281	0.0261178	0.18725	0.0248645
chr17	40190408	40190886	479	3.60769	0.0261513	0.936252	0.0768016
chr15	52100740	52101343	604	-2.10256	0.0262039	3.89857	16.7432
chr2	129905101	129906392	1292	2.23735	0.026217	1.30113	0.275936
chr9	133761610	133762193	584	4.53808	0.0262289	0.739375	0.0318249
chr19	38463091	38463716	626	4.28318	0.0262508	2.59263	0.13316
chr10	11730463	11731162	700	4.48169	0.0262619	2.24219	0.100357
chr21	44757455	44757923	469	3.18512	0.0262962	2.61669	0.287697
chr5	893746	894307	562	2.49756	0.0262981	28.2599	5.00416
chr15	52247444	52247789	346	-4.08431	0.0263142	0.561751	9.52894
chr11	11580573	11581608	1036	4.16182	0.0263334	0.369688	0.0206538
chr1	3686394	3686660	267	4.22109	0.0263414	0.744188	0.0399034
chr1	204872954	204874090	1137	2.62789	0.0263464	4.64757	0.751887
chr20	56184521	56185184	664	2.09705	0.0263526	1.11388	0.260353
chr11	83103960	83104525	566	-3.33945	0.0263776	1.10906	11.2262
chr7	1592018	1592966	949	2.36384	0.0264059	0.374501	0.0727554
chr2	52433810	52434900	1091	2.62441	0.026412	6.1215	0.99273
chr16	46932522	46933385	864	4.28333	0.0264175	0	0
chr6	10475189	10476904	1716	2.16094	0.0264716	0.369688	0.0826663
chr14	24166618	24167665	1048	2.34542	0.0264778	1.29631	0.255076
chr16	80153247	80154225	979	3.02413	0.0265135	1.48838	0.182961
chr1	204977432	204978215	784	2.29141	0.0265202	0.744188	0.15202
chr5	107490266	107490926	661	4.65141	0.0265934	2.97194	0.118257
chr1	21278927	21279219	293	4.70758	0.026611	1.30113	0.0497961
chr10	28784059	28784976	918	3.9554	0.0266422	0.374501	0.0241412
chrX	153380768	153381948	1181	2.44097	0.0266586	0.561751	0.103452
chr17	76867216	76867756	541	3.28955	0.026708	0.749001	0.0766002
chr11	77779813	77780289	477	-3.80301	0.0267094	0.749001	10.4545
chr10	124509451	124510630	1180	2.56771	0.0267159	0	0
chr19	15094873	15095405	533	4.39003	0.0267369	1.30113	0.0620566
chr10	97903483	97903904	422	4.67046	0.0267408	2.59744	0.101999
chr7	74262594	74263368	775	-3.72574	0.0267709	2.60225	34.4277
chr21	43906672	43907195	524	4.33122	0.0268458	1.30113	0.0646385
chr19	7840978	7841961	984	3.89347	0.0268662	1.86288	0.125353
chrX	151694111	151694934	824	3.96413	0.0268693	0.931439	0.0596804
chr10	89793676	89794011	336	3.42321	0.0268975	1.1235	0.104733
chr14	72443198	72444009	812	3.81596	0.026902	0.556938	0.0395448
chr9	132984407	132985091	685	3.44003	0.0269296	5.94869	0.548111
chr2	202156940	202157459	520	-4.64248	0.026933	4.08582	102.048
chr12	124701040	124701726	687	2.35444	0.0269963	0.744188	0.145521
chr5	181109778	181110494	717	4.27401	0.027009	23.5931	1.21949
chr19	18431745	18432135	391	3.6414	0.0270134	50.0286	4.00912
chr11	71888206	71888676	471	4.77753	0.0270197	2.42463	0.0884025
chr12	52769821	52770175	355	4.85248	0.027041	2.05494	0.0711308
chr2	47310744	47311192	449	4.16136	0.0270462	43.4556	2.42858
chr2	233164211	233165126	916	3.31238	0.0270508	0	0
chr11	62005426	62006244	819	4.6163	0.0270625	1.11388	0.0454143
chr19	38342694	38343769	1076	2.21784	0.0270711	0.931439	0.200225
chr14	100844870	100845565	696	2.61911	0.0270856	2.59744	0.422779
chr17	28436435	28436988	554	4.21918	0.0271023	0.369688	0.0198489
chr2	196645995	196646448	454	4.90127	0.0271068	1.11388	0.0372743
chr15	99964147	99965093	947	2.98006	0.0271113	3.34644	0.424128
chr8	98023940	98024877	938	2.86813	0.0271164	0.561751	0.0769399
chr17	28034201	28034752	552	3.91367	0.0271174	16.3818	1.087
chr17	11390862	11391723	862	4.42511	0.0271184	7.81157	0.363619
chr9	114993452	114994045	594	4.65163	0.0271331	2.41019	0.0958897
chr1	159889658	159890328	671	2.63898	0.027146	2.60225	0.41777
chr7	100726979	100727881	903	2.96755	0.0271831	0.926625	0.118463
chr5	133371808	133372787	980	3.85577	0.0271928	4.62831	0.319685
chr10	114159411	114160049	639	4.45008	0.0271971	19.1761	0.877306
chr11	120540026	120540543	518	3.72212	0.0272111	2.23256	0.169175
chr20	50046401	50046743	343	3.76729	0.0272247	1.30594	0.0959082
chr3	127443509	127444329	821	2.63101	0.027244	20.1171	3.24753
chr1	107011705	107012463	759	2.62553	0.0272539	0.926625	0.150156
chr15	51866749	51867137	389	4.22126	0.0272641	2.41019	0.129219
chr17	4439358	4440483	1126	2.10945	0.0272703	0.561751	0.130178
chr14	102786762	102787224	463	4.08489	0.0272899	1.11869	0.0659225
chr1	1380502	1381777	1276	2.20061	0.0272951	0.926625	0.201584
chr17	60995882	60996623	742	2.94103	0.0273003	3.5385	0.460767
chr9	34625638	34626222	585	3.39235	0.0273042	0.561751	0.0534991
chr6	40505628	40506302	675	4.08492	0.0273061	1.68044	0.0990238
chr19	48739385	48739811	427	4.08493	0.0273115	1.11388	0.0656372
chr6	37965606	37966501	896	2.6388	0.0273199	2.22775	0.357691
chr7	46383558	46384042	485	4.02139	0.0273264	0.374501	0.0230618
chr8	122876336	122877025	690	2.66441	0.0273598	3.54332	0.558911
chr20	49798217	49798810	594	3.64151	0.0273935	1.30113	0.10426
chr8	103271089	103272230	1142	2.30232	0.0274001	1.68044	0.340687
chr16	12380335	12381444	1110	3.48321	0.0274185	0.744188	0.0665475
chr5	1166538	1166922	385	4.22129	0.0274467	0.556938	0.0298588
chr1	34197494	34198132	639	4.51084	0.027477	0.744188	0.0326427
chr17	28509153	28510383	1231	2.27567	0.0274781	1.67081	0.345051
chr7	45581063	45581817	755	2.5907	0.0274827	1.85325	0.307648
chr16	763423	763812	390	-2.91556	0.0274912	1.48356	11.1938
chr19	14170519	14171039	521	4.16107	0.0275004	1.48356	0.0829274
chr21	43718064	43718549	486	2.38513	0.0275179	0.744188	0.142458
chr15	75766963	75768274	1312	2.52138	0.0275216	1.85806	0.323631
chr5	173310216	173310777	562	3.31887	0.0275222	1.84844	0.185236
chr16	84078887	84079472	586	3.73582	0.0275372	0.556938	0.0418035
chr2	194983115	194984463	1349	2.62579	0.0275379	0.739375	0.119791
chr6	27574955	27575395	441	4.51089	0.0275429	28.9896	1.27154
chr6	109852217	109852918	702	4.79063	0.0275624	11.3597	0.410433
chr17	79217750	79218462	713	2.8949	0.0275642	2.60225	0.349862
chr6	26125300	26125656	357	-4.0856	0.0275767	2.04531	34.7255
chr12	60564636	60565235	600	4.28432	0.0275911	3.71131	0.190467
chr16	70762916	70763663	748	3.53735	0.0275972	2.0405	0.175747
chr8	95681437	95682174	738	4.22132	0.0276033	5.58382	0.299356
chr1	110270051	110270546	496	4.53781	0.0276286	3.91782	0.168666
chr10	69930971	69931536	566	4.51096	0.0276531	1.31075	0.0574893
chr19	4590501	4591363	863	3.64159	0.0276603	7.25463	0.581284
chr3	140273656	140274295	640	3.68145	0.0276735	3.15919	0.246234
chr2	172978247	172978764	518	-4.37023	0.027685	39.0578	807.751
chr3	13214549	13215073	525	3.0212	0.027747	5.39175	0.664139
chr3	134749489	134750823	1335	-2.17946	0.0277668	1.11869	5.0675
chr11	78216255	78217136	882	-3.46233	0.0277864	0.18725	2.0639
chr6	52672478	52672776	299	-3.76433	0.0277913	12.8385	174.457
chr1	54249799	54250348	550	2.64499	0.027808	20.5157	3.27994
chr10	6136215	6137202	988	2.43151	0.0278127	2.247	0.416531
chr10	101107342	101108562	1221	3.22777	0.0278525	3.17363	0.338766
chr1	43872253	43872708	456	4.33058	0.0278726	9.11751	0.453149
chr15	73357464	73357995	532	4.48074	0.0278747	3.72575	0.16687
chr12	54405614	54406143	530	3.68159	0.0278798	4.83482	0.376799
chr8	61886658	61887971	1314	2.38373	0.0278961	1.47875	0.283348
chr21	44354888	44355385	498	3.45352	0.0278963	3.5385	0.323002
chr17	5123833	5124622	790	2.2089	0.0279029	1.11388	0.240931
chr12	3018986	3020138	1153	2.27169	0.0279178	0.926625	0.191893
chr7	151718740	151719348	609	3.52835	0.0279486	6.88013	0.596289
chr14	60485319	60486130	812	3.05558	0.0279579	11.1436	1.34031
chr8	142974233	142974982	750	2.93937	0.0280111	17.4812	2.27895
chr4	3773155	3774083	929	2.34655	0.028031	6.71695	1.32066
chr16	88330230	88330849	620	2.9828	0.0280315	15.0662	1.90586
chr7	123282232	123282801	570	-3.89158	0.0280504	8.72857	129.546
chr1	19759728	19760159	432	-3.76372	0.0280589	1.48838	20.2164
chr17	21003968	21004534	567	4.33047	0.0280593	1.67563	0.0832867
chr6	35511975	35513228	1254	2.4087	0.0280622	1.47875	0.278486
chr1	106993373	106993785	413	4.2214	0.0280749	2.04531	0.109646
chr5	175637786	175638508	723	4.56134	0.0280903	2.41019	0.102083
chr20	60231586	60232684	1099	2.14965	0.0280939	1.30113	0.29323
chr6	41407204	41408294	1091	2.44353	0.0281363	2.41019	0.443071
chr18	12295959	12296677	719	2.79798	0.0281954	1.85325	0.266477
chr1	206766280	206766846	567	3.05269	0.0282157	5.03169	0.606404
chr9	114286918	114287535	618	2.09718	0.0282193	1.11388	0.260329
chr4	8334708	8335532	825	3.70664	0.028231	0.744188	0.0569997
chr12	76216749	76217396	648	4.5612	0.028256	0.18725	0.00793169
chr21	38719160	38719667	508	4.28486	0.0282748	1.11869	0.0573903
chr7	40644732	40646065	1334	2.24251	0.0282797	9.12232	1.92772
chr6	39792102	39792775	674	-2.78828	0.0282829	1.30113	8.98826
chr20	37436883	37437522	640	3.60269	0.0282962	0.561751	0.0462408
chr6	449632	450645	1014	3.36569	0.0282998	0.556938	0.0540297
chr14	77829412	77829945	534	3.8639	0.028345	1.85806	0.127617
chr7	92259961	92260720	760	2.18075	0.028346	1.48356	0.327216
chr17	48995883	48996266	384	3.7641	0.0283462	3.5385	0.260444
chr19	28898553	28899523	971	3.60268	0.0283671	2.59744	0.213811
chr8	135706180	135706610	431	4.42381	0.0283685	25.8545	1.20459
chr5	110054384	110054771	388	-4.31412	0.0283949	3.16882	63.0343
chr2	159637894	159638437	544	3.91119	0.0284009	1.67081	0.111056
chr1	34059711	34060189	479	4.76434	0.0284023	2.05013	0.075435
chr9	113873952	113874816	865	2.42902	0.0284232	3.51925	0.653494
chr1	23470410	23471332	923	3.13369	0.0284463	20.6452	2.35225
chr19	43546823	43547547	725	3.87065	0.0284669	48.1705	3.29306
chr10	12637110	12637704	595	4.3899	0.0284746	2.23256	0.106491
chr16	19129935	19131104	1170	2.44964	0.0285042	14.5093	2.65602
chr17	74834012	74834540	529	4.33018	0.0285467	0.556938	0.027688
chr2	239715244	239716160	917	3.61113	0.0285609	0.18725	0.0153237
chr11	124896581	124897300	720	3.25818	0.0285755	1.11388	0.11642
chr1	37243835	37244706	872	3.68207	0.0285769	3.34163	0.260343
chr10	100779057	100779822	766	-4.08656	0.0285814	1.85806	31.5673
chr10	100685602	100686692	1091	3.47845	0.0285982	0	0
chr5	178657239	178658115	877	3.12271	0.0286028	0	0
chr5	134029154	134029618	465	3.19921	0.0286207	0.18725	0.0203875
chr3	147384943	147385763	821	4.1604	0.0286278	0.926625	0.0518203
chr10	124352877	124353557	681	3.44251	0.0286289	0.926625	0.0852325
chr21	42174870	42176454	1585	2.18514	0.0286365	0.744188	0.16364
chr15	48096430	48097034	605	3.72306	0.0286432	0	0
chr16	19922384	19923244	861	4.94165	0.0286751	0.369688	0.0120296
chr12	128784013	128784631	619	4.45062	0.028725	1.11869	0.0511609
chr1	203934057	203934491	435	2.78379	0.0287415	2.23256	0.324191
chr6	11227173	11227605	433	3.5646	0.0287467	0.369688	0.0312452
chr21	45614998	45615593	596	3.53991	0.0287523	0.561751	0.0482976
chr5	141215353	141216634	1282	3.29204	0.0287536	1.67563	0.17107
chr10	78746287	78747277	991	3.12933	0.0287556	0.374501	0.0427986
chr22	23127104	23127667	564	3.65447	0.0287926	0	0
chr16	86621273	86622027	755	2.27701	0.0287966	0.744188	0.153544
chr22	50570212	50570949	738	3.54863	0.0288038	0.374501	0.0320043
chr2	119181365	119181690	326	4.5376	0.0288073	0.18725	0.00806247
chr17	27366825	27367195	371	4.83079	0.0288093	1.30594	0.0458893
chr9	130377552	130378294	743	2.88266	0.0288311	2.0405	0.276674
chr7	75032008	75032597	590	3.44279	0.0288324	0	0
chr2	135836455	135836865	411	4.07752	0.0288671	3.15919	0.18712
chr11	74941899	74942779	881	4.10241	0.0288702	85.0055	4.94879
chr9	125984578	125984991	414	3.87946	0.0288777	0.926625	0.062961
chr16	79258518	79259642	1125	2.09079	0.0289366	0.926625	0.217527
chr17	17336964	17337602	639	4.99691	0.0289836	1.29631	0.0405968
chr6	149041267	149041969	703	3.48013	0.0289944	1.30113	0.116599
chr1	169864517	169864939	423	5.0031	0.0290025	0.18725	0.00583901
chr11	77332141	77332699	559	4.28541	0.0290039	1.30113	0.066724
chr20	60452438	60453406	969	2.36226	0.0290401	0.374501	0.072835
chr13	23811286	23811938	653	-3.0385	0.029059	0.18725	1.53851
chr12	125355160	125356769	1610	2.4784	0.0290855	1.48356	0.266215
chr2	240789451	240789772	322	3.65504	0.0291421	0.926625	0.0735577
chr3	126299769	126301010	1242	2.10692	0.0291938	1.85806	0.431336
chr2	119404326	119404759	434	4.45079	0.0292185	0.556938	0.0254675
chr9	34992419	34992701	283	3.72227	0.0292235	0.374501	0.0283752
chr4	84814429	84814781	353	-3.33715	0.0292252	0.369688	3.73608
chr16	35523975	35524372	398	-2.32477	0.0292678	1.85806	9.30865
chr13	21756059	21756644	586	3.11272	0.0292679	1.11388	0.12877
chr19	4660347	4660999	653	-1.95208	0.0293261	0.18725	0.724531
chr9	112590534	112591329	796	3.87967	0.0293752	1.48356	0.100788
chr2	226630379	226631154	776	4.51209	0.0293847	0.374501	0.0164126
chr20	55031312	55032031	720	3.18035	0.0293911	0.369688	0.0407807
chr2	121197350	121197990	641	2.18774	0.0293949	0.556938	0.122245
chr9	137717412	137718341	930	3.44607	0.0294148	0.556938	0.0511016
chr3	100775468	100776039	572	4.51212	0.029426	0.744188	0.0326137
chr20	397810	398380	571	4.27103	0.0294439	0.926625	0.0479951
chr13	51001039	51001811	773	4.28574	0.029459	1.48838	0.0763091
chr13	50410916	50411765	850	3.18406	0.0294692	2.0405	0.224511
chr20	62397010	62397590	581	2.3009	0.0294836	1.30113	0.264047
chr19	49433388	49433999	612	4.51215	0.0294842	1.11869	0.0490248
chr10	95229408	95230358	951	2.17434	0.0295061	6.51526	1.44342
chr22	45867123	45867785	663	3.96285	0.0295519	20.8325	1.336
chr2	237884774	237885805	1032	2.33959	0.02958	2.23256	0.441079
chr5	8685807	8686465	659	-4.23988	0.0295861	0.556938	10.523
chr20	59459499	59460225	727	2.21638	0.0295959	1.30113	0.279977
chr21	35178840	35179339	500	3.96282	0.0296067	2.0405	0.13086
chr18	5000289	5001197	909	4.66982	0.0296286	1.48356	0.0582842
chr3	11499125	11499526	402	3.7223	0.029645	0	0
chr16	89911417	89911715	299	3.1709	0.0296903	2.22294	0.246826
chr15	77771044	77771392	349	4.27074	0.0296908	0.744188	0.0385533
chr22	44362793	44363939	1147	3.03828	0.0296979	3.89857	0.474562
chr3	53495226	53495965	740	3.354	0.0297086	1.11388	0.108939
chr12	34338414	34339598	1185	3.0246	0.0297306	0	0
chr20	41308213	41308791	579	3.08488	0.0297342	1.30113	0.153348
chr2	28193774	28194196	423	4.45095	0.02974	3.52888	0.161349
chr17	67774886	67775222	337	4.89212	0.0297419	0.18725	0.00630592
chr7	22718005	22718827	823	-3.54057	0.0297439	3.72575	43.3544
chr11	94512287	94512751	465	3.77043	0.0297616	1.11388	0.081625
chr4	70709577	70710172	596	-1.93208	0.0297684	0.749001	2.85823
chr1	192531014	192531484	471	-2.22412	0.0297824	0	0
chr20	41841597	41842160	564	2.92674	0.029814	3.15438	0.414836
chr3	62112694	62113062	369	3.12405	0.0298451	1.11869	0.128315
chr8	79610269	79610863	595	4.59521	0.0298824	1.67563	0.0693238
chr8	48679435	48679857	423	-3.95618	0.0299189	3.33681	51.7917
chr5	178995033	178995436	404	3.50417	0.0299397	0.926625	0.0816667
chr14	67736733	67737376	644	4.45102	0.0299507	1.10906	0.0507068
chr16	87685478	87685793	316	3.61294	0.0299561	1.67081	0.136561
chr17	59555110	59555576	467	3.58814	0.0299703	0.18725	0.0155699
chr8	107587974	107588494	521	2.60874	0.0299831	0.369688	0.0606073
chr6	151597103	151597491	389	4.99076	0.0300082	2.23738	0.0703671
chr10	132650734	132651206	473	-4.27595	0.0300325	1.29631	25.1131
chr12	107744627	107745252	626	3.96263	0.0300359	2.24219	0.143814
chr16	84840047	84840317	271	-3.75939	0.0300452	0.556938	7.54218
chr13	47288434	47289146	713	4.08967	0.0300559	0.374501	0.0219958
chr10	32332092	32332724	633	-3.36686	0.0300658	0.936252	9.65867
chr16	66925041	66925829	789	2.24683	0.0301328	1.30594	0.275144
chr15	52275180	52275748	569	2.88567	0.0301379	0.369688	0.0500222
chr3	146334176	146334603	428	-4.43746	0.0301412	0.744188	16.1247
chr1	3919167	3919701	535	4.32929	0.0301437	1.48356	0.0738004
chr10	3185187	3185978	792	3.53521	0.0301679	1.86769	0.161102
chr17	77655131	77656636	1506	2.31835	0.0301693	0.556938	0.111664
chr1	37065811	37066669	859	3.4446	0.0301875	0.369688	0.0339553
chr11	75166716	75167705	990	2.41766	0.0302132	0.926625	0.173426
chr14	34530046	34530435	390	4.84148	0.030216	0.744188	0.0259569
chr7	99013229	99014269	1041	-2.07733	0.0302365	1.29631	5.47078
chr9	123420449	123420901	453	2.93479	0.0302495	0.739375	0.0966951
chrX	57918752	57919529	778	-2.55513	0.0302549	0.744188	4.37375
chr19	11148892	11149617	726	3.68318	0.0302689	2.22775	0.173429
chr6	155171084	155171570	487	3.65387	0.0302721	1.11388	0.0884939
chr15	34794604	34795736	1133	2.98917	0.0302737	1.29631	0.16326
chr14	56702385	56703019	635	4.15948	0.0302778	4.10026	0.229447
chr20	20930475	20931522	1048	3.01955	0.0303026	0.374501	0.0461826
chr12	6883695	6884494	800	3.90777	0.0303369	8.18126	0.545086
chr5	135999332	135999737	406	3.77181	0.030341	5.56938	0.407737
chr4	153215991	153216669	679	4.77819	0.0303667	0.18725	0.00682409
chr17	81198216	81198701	486	4.15942	0.0303801	0.556938	0.031167
chr2	237359693	237360929	1237	2.17242	0.0304057	1.86288	0.413257
chr1	3606195	3606776	582	4.22178	0.0304212	14.5574	0.780192
chr6	154140375	154141108	734	3.23113	0.0304293	0.369688	0.0393702
chr8	124415371	124415972	602	3.74585	0.0304319	0.18725	0.0139576
chr17	50615277	50615733	457	2.82891	0.0304397	0.18725	0.0263534
chr9	129721978	129722334	357	2.54888	0.0304413	1.498	0.255991
chr1	24108512	24109381	870	2.24543	0.0304603	1.30113	0.274396
chr5	177098216	177098576	361	2.91919	0.0304685	0.374501	0.0495097
chr6	138465008	138465403	396	-3.22712	0.0304696	0	0
chr19	31782062	31782707	646	4.22179	0.0304705	2.42463	0.129945
chr9	134636045	134636514	470	2.4349	0.0304853	0.18725	0.0346293
chr9	134918033	134919305	1273	2.13398	0.0305365	0.749001	0.170644
chr5	132476336	132476788	453	-4.11821	0.0305439	0.931439	16.1756
chr1	2873057	2874007	951	3.57095	0.0305499	1.11388	0.0937291
chr9	135110557	135111176	620	3.00871	0.0305696	3.15438	0.391923
chr5	116304847	116305229	383	-4.36954	0.0305767	7.45632	154.13
chr2	102113311	102113657	347	3.90728	0.0306344	0.739375	0.0492785
chr15	88311581	88312264	684	4.42162	0.0306588	4.46513	0.20835
chr11	17695508	17696670	1163	2.30468	0.0306623	1.67081	0.338181
chr17	27417671	27418749	1079	2.09739	0.030666	1.67081	0.390436
chr7	2056466	2056989	524	2.16332	0.0306831	0	0
chr11	62992855	62993768	914	2.87011	0.0306842	1.11388	0.152351
chr6	157969135	157969414	280	-4.08055	0.0306992	0.561751	9.50413
chr15	74402714	74403344	631	2.42968	0.0307056	0.374501	0.0695098
chr19	18745556	18746321	766	3.32964	0.0307073	5.96313	0.593136
chr16	87695496	87696159	664	2.4431	0.0307138	0.374501	0.0688663
chr11	64642145	64642667	523	3.5295	0.0307299	1.10906	0.096044
chr8	124282350	124282832	483	4.5742	0.030733	1.67563	0.0703407
chr4	31461405	31462013	609	-3.75799	0.0307346	2.59263	35.0758
chr3	20503281	20503819	539	4.09072	0.030742	6.7362	0.395352
chr16	22306632	22307597	966	2.44263	0.0307542	1.666	0.306458
chr16	3729724	3730521	798	2.34371	0.0307681	0.931439	0.183496
chr16	86149932	86150915	984	3.25108	0.0307716	2.97194	0.312153
chr14	98746102	98746972	871	3.4752	0.0307795	1.67081	0.150241
chr4	168978796	168980707	1912	2.21692	0.0307871	1.67081	0.359392
chr19	16293415	16294422	1008	3.08758	0.0307992	6.50082	0.764738
chr17	76903730	76904420	691	-4.08848	0.0308	1.49319	25.4022
chr19	30304524	30305685	1162	2.87049	0.0308013	3.89375	0.532433
chr16	88989084	88989454	371	2.81709	0.030802	7.4852	1.06212
chr8	144330222	144330537	316	2.24427	0.0308046	46.8935	9.89736
chr19	2443989	2445687	1699	2.72773	0.0308057	7.25463	1.09518
chr5	177332840	177333335	496	-2.81953	0.030855	1.11388	7.86323
chr2	120819815	120820275	461	3.55394	0.0308639	1.68044	0.14308
chr20	22749658	22750347	690	4.26945	0.0308676	0.931439	0.0482973
chr8	48930314	48930706	393	3.96228	0.0308916	4.10026	0.263055
chr1	111541716	111542564	849	3.19314	0.0309041	0.744188	0.0813678
chr2	200238080	200238626	547	4.38975	0.0309086	4.28269	0.204301
chr11	6397651	6397924	274	3.44552	0.0309131	2.247	0.206253
chr5	15884962	15885527	566	4.32888	0.0309362	1.85325	0.0922173
chr3	138382912	138383351	440	4.28677	0.030939	0.926625	0.0474742
chr18	3787218	3787965	748	4.02402	0.0309429	0.931439	0.0572536
chr9	98299184	98299765	582	3.74616	0.030956	1.11869	0.0833689
chr17	5422544	5422876	333	3.77322	0.0309647	2.42944	0.177686
chr13	20142248	20143095	848	2.73658	0.0309673	2.79432	0.419259
chr2	198685256	198685702	447	4.22186	0.0309864	2.41982	0.129681
chr19	57012754	57013639	886	3.55345	0.0309937	0.739375	0.0629751
chr3	64696545	64697001	457	2.30575	0.030998	0.926625	0.187415
chr7	159097631	159098761	1131	2.29355	0.0310054	0.556938	0.1136
chr5	169197166	169197712	547	2.70316	0.0310242	0	0
chr10	119680657	119681027	371	3.26102	0.0310244	1.86769	0.194823
chr15	50021641	50021911	271	4.45135	0.0310246	0.936252	0.042796
chr1	49982127	49982981	855	3.61425	0.0310246	0.744188	0.0607696
chr17	59782885	59783249	365	-2.24586	0.0310499	0.561751	2.6645
chr20	20762183	20762739	557	-3.89947	0.0310536	1.48356	22.1393
chr1	64718666	64719340	675	4.59534	0.0310552	0.18725	0.00774616
chr17	42098157	42099304	1148	3.3653	0.0310711	5.2045	0.505039
chr1	15952709	15953116	408	3.05512	0.0310877	1.48356	0.178494
chr12	132049261	132050168	908	2.61374	0.0310888	0.739375	0.120796
chr9	604296	604872	577	4.65305	0.0311386	2.60225	0.103429
chr3	102148733	102149528	796	2.90732	0.0311391	1.11869	0.149114
chr1	26573891	26574338	448	4.22188	0.0311479	11.5421	0.618548
chr19	6005421	6005998	578	3.59779	0.03115	1.30113	0.107467
chr9	87285182	87285883	702	3.74602	0.0311512	0.369688	0.027553
chr12	56599594	56600027	434	4.51315	0.0311524	0	0
chr14	23575263	23575981	719	2.8518	0.0311524	10.9996	1.52371
chr1	167586989	167587677	689	4.15902	0.0311638	1.67563	0.0937968
chr1	109832424	109833176	753	2.83097	0.0311735	1.48838	0.209173
chr15	85768162	85768499	338	4.82109	0.0311741	1.11869	0.0395746
chr14	92562537	92563244	708	3.88044	0.0311771	1.11869	0.0759592
chr22	20248601	20249592	992	2.34352	0.031184	1.29631	0.255412
chr11	64133104	64133489	386	4.2691	0.0311903	6.51526	0.337912
chr17	82382698	82383214	517	3.44586	0.0311906	2.22775	0.204437
chr6	46875986	46876623	638	-2.08104	0.0312147	1.85325	7.84132
chr17	48009259	48010096	838	2.31873	0.0312338	0.561751	0.1126
chr10	17062567	17063511	945	-2.18311	0.0312353	0.374501	1.70073
chr1	222331340	222331992	653	3.65002	0.0312431	0.931439	0.0741975
chr15	94599327	94600348	1022	4.6695	0.0312629	1.30594	0.0513174
chr10	7043672	7044411	740	-4.24011	0.0312861	1.86769	35.2943
chr5	5139249	5140296	1048	2.87203	0.0312894	2.22294	0.303641
chr22	32752165	32753575	1411	2.16541	0.0312898	0	0
chr6	2684871	2685765	895	2.54253	0.0312923	1.11869	0.192013
chr3	141075156	141075856	701	3.70641	0.0312976	1.48356	0.113649
chr3	13613719	13614033	315	4.28701	0.031317	2.60707	0.133547
chr11	47820581	47820992	412	5.18196	0.0313397	1.48356	0.0408677
chr6	53365941	53366509	569	4.45145	0.0313443	0.374501	0.0171173
chr5	112995867	112996389	523	-3.5567	0.0313496	2.59744	30.5647
chr19	12874039	12874552	514	2.50775	0.0313728	4.46994	0.785946
chr10	124616183	124616595	413	3.57165	0.0313835	0.739375	0.0621858
chr7	573531	574226	696	3.29587	0.0313897	0.556938	0.056709
chr10	79168642	79168982	341	4.53719	0.0314171	0.744188	0.0320518
chr6	165181911	165182407	497	3.83777	0.0314229	1.48356	0.103758
chr8	82370914	82372286	1373	2.09055	0.0314291	1.11388	0.261528
chr2	95308077	95309019	943	2.09746	0.031437	2.22775	0.520555
chr5	10332947	10333919	973	2.1303	0.0314634	4.83963	1.10542
chr12	92970861	92971885	1025	2.63418	0.0314638	9.3192	1.50111
chr3	13610394	13611247	854	2.41909	0.0314806	2.78469	0.520666
chr21	41466088	41466875	788	-2.91034	0.031497	1.30594	9.81798
chr2	10221948	10222894	947	2.46544	0.0315024	0.749001	0.135617
chr2	20666382	20667335	954	2.12404	0.0315049	0.931439	0.213675
chr5	168519776	168520668	893	3.47314	0.0315355	1.48838	0.134028
chr7	157525390	157526171	782	3.9058	0.0315488	2.0405	0.136136
chr2	71944297	71944859	563	4.28717	0.0315587	5.01725	0.25698
chr2	240323929	240324428	500	4.57484	0.0315707	0.744188	0.0312262
chr10	30806356	30807120	765	4.15882	0.0315712	0.931439	0.0521466
chr15	79253555	79254167	613	4.15881	0.0315801	3.34644	0.187351
chr10	83791535	83792160	626	4.09196	0.0315879	2.415	0.141616
chr6	116324783	116325599	817	3.82657	0.0316047	2.03569	0.143483
chr19	49073595	49074276	682	2.227	0.0316119	1.47875	0.315865
chr1	147586892	147587628	737	2.31442	0.0316148	0.374501	0.0752911
chr6	137051793	137052369	577	3.72243	0.0316158	2.0405	0.154588
chr17	7005586	7006874	1289	2.57962	0.0316457	1.29631	0.216853
chr22	48520081	48520638	558	4.28722	0.0316467	2.415	0.12369
chr18	7004504	7005102	599	4.38971	0.0316515	1.48838	0.0710034
chr14	90598065	90598426	362	4.53715	0.0316648	3.52406	0.151784
chr9	89390959	89392209	1251	2.51941	0.0316661	24.899	4.34274
chr12	129570769	129571316	548	-3.53769	0.0316706	0.926625	10.7611
chr3	137815289	137816116	828	3.44645	0.0316794	0.18725	0.0171766
chr6	41197726	41198634	909	2.72169	0.0316873	1.29631	0.196516
chr10	124049258	124049949	692	3.22067	0.0317487	0.744188	0.0798298
chr14	103095266	103095593	328	3.36523	0.031755	0.744188	0.0722182
chr9	77899820	77900291	472	3.77495	0.031768	0.931439	0.0680426
chr11	45400629	45401289	661	4.02455	0.0317722	0.744188	0.045727
chr14	96615044	96616400	1357	2.14328	0.0317864	0	0
chr22	26740909	26741704	796	4.3897	0.031808	0	0
chr20	63036170	63036660	491	2.44559	0.0318104	9.65519	1.77241
chr10	74643662	74643933	272	-4.36928	0.0318119	3.36088	69.4605
chr17	50470543	50471001	459	-3.93006	0.0318156	73.6217	1122.21
chr10	123342258	123343452	1195	2.23702	0.0318326	0.18725	0.0397204
chr7	4134238	4134750	513	-4.24018	0.0318407	1.11869	21.1412
chr20	41795719	41796747	1029	2.18826	0.0318515	0.556938	0.122201
chr17	66362178	66362936	759	2.45164	0.0318565	0.369688	0.0675799
chr9	135176772	135177279	508	4.36325	0.0318749	0.369688	0.0179625
chr17	77896932	77897422	491	4.51355	0.0318775	0	0
chr1	35434185	35434786	602	4.59543	0.0318845	2.59744	0.107444
chr4	20313280	20314004	725	-4.36926	0.031933	0.931439	19.25
chr3	8792326	8793818	1493	2.17054	0.0319653	4.64757	1.03235
chr4	5191825	5192579	755	3.65932	0.0319708	0.374501	0.0296407
chr9	69383320	69383885	566	4.26828	0.0319898	0.18725	0.00971722
chr12	12035986	12036618	633	-2.89545	0.0320081	4.10507	30.5448
chr19	4521396	4521910	515	-3.75547	0.0320268	0.561751	7.58668
chr6	43304355	43304816	462	3.40479	0.0320351	0.556938	0.052585
chr16	28258211	28258807	597	2.27333	0.0320393	1.11869	0.231403
chr18	79915457	79916872	1416	3.10089	0.0320427	0	0
chr14	32756198	32757468	1271	2.40508	0.0320461	0.18725	0.0353527
chr15	87645469	87646392	924	3.56195	0.0320675	5.95351	0.504103
chr7	39453624	39454118	495	2.23732	0.0320878	0.18725	0.0397119
chr17	80789322	80789861	540	3.7757	0.0321286	20.8132	1.51964
chr16	66926654	66927501	848	-1.89459	0.0321598	0.374501	1.39246
chr12	132634436	132635673	1238	2.19401	0.0321693	3.15438	0.689367
chr7	27243027	27243830	804	3.44705	0.0321832	0	0
chr1	204465439	204466197	759	2.57139	0.0322373	5.04613	0.848973
chr1	181221577	181222297	721	2.99445	0.0322529	3.72094	0.46691
chr6	88563878	88564517	640	-4.13623	0.0322921	0.739375	13.0015
chr12	107439924	107440459	536	-5.28597	0.0323119	3.73538	145.737
chr14	57189090	57189608	519	3.64298	0.0323177	14.1251	1.1307
chr8	143629442	143630502	1061	2.62372	0.0323429	1.11388	0.180725
chr1	18720952	18721753	802	3.44725	0.0323512	0.739375	0.0677859
chr9	124353835	124354266	432	3.72644	0.0323611	6.33282	0.478439
chr2	219230250	219230509	260	-1.9332	0.0323838	5.22857	19.9679
chr2	155190393	155190855	463	-2.65246	0.0323853	0.744188	4.67901
chr4	76051466	76051800	335	-3.62981	0.0323873	1.10906	13.7289
chrX	38260177	38260586	410	-4.20807	0.0323957	3.913	72.3212
chr10	12180988	12182195	1208	2.22744	0.0324143	1.48838	0.317824
chr1	12601909	12602439	531	2.56163	0.0324158	1.30113	0.22039
chr4	153318742	153319152	411	-2.31279	0.0324164	1.49319	7.41881
chr9	93807355	93807923	569	2.30211	0.0324219	2.59744	0.526674
chr11	125069856	125070347	492	-3.49607	0.0324283	0.369688	4.17115
chr12	113371341	113372161	821	2.29812	0.0324439	1.48838	0.302629
chr14	76123195	76123748	554	4.45176	0.0324458	0.744188	0.0340072
chr5	1734960	1735760	801	2.19405	0.0324522	1.48838	0.325267
chr6	40152080	40152900	821	4.77854	0.0324535	0.561751	0.0204672
chr11	34585934	34586930	997	3.43693	0.03246	0.18725	0.0172904
chr7	94087228	94088131	904	-2.48396	0.0324703	2.59263	14.504
chr5	74595191	74595531	341	3.96165	0.0324988	0.374501	0.0240369
chrX	153719337	153719612	276	4.77856	0.0325226	5.95351	0.216912
chr12	67499103	67499629	527	4.89236	0.0325314	0.561751	0.0189146
chr22	19919226	19920398	1173	2.9227	0.0325321	0.926625	0.122204
chr3	134442126	134442677	552	4.2878	0.0325643	8.5702	0.438768
chr5	2548695	2549677	983	2.62363	0.0325823	1.11869	0.181518
chr6	53697409	53698022	614	4.3546	0.0326261	9.30476	0.454821
chr8	139395398	139396163	766	3.90414	0.0326284	3.16882	0.211657
chr21	15749008	15749687	680	-3.78669	0.0326521	10.7979	149.022
chr22	38419049	38419702	654	3.7267	0.0326697	0.18725	0.014144
chr10	31146845	31147211	367	3.77678	0.0326707	1.30594	0.0952791
chr7	139785536	139786092	557	4.51397	0.0326708	1.67081	0.0731286
chr14	54182476	54183036	561	3.72249	0.0327082	0	0
chr9	136701032	136701931	900	2.70547	0.0327166	1.30113	0.199477
chr11	1348552	1349189	638	4.09733	0.0327242	2.41019	0.14081
chr15	72289540	72290469	930	2.3111	0.0327242	2.59744	0.523402
chr1	67759774	67760787	1014	-2.21599	0.0327272	0.926625	4.30512
chr19	40904806	40905191	386	-4.24029	0.0327397	0.18725	3.53896
chr10	110866054	110866435	382	-3.13259	0.0327552	0.749001	6.5688
chr11	36439036	36439835	800	4.09729	0.0327614	10.6059	0.619642
chr9	129315146	129315557	412	3.96155	0.0327671	1.11388	0.0714978
chr15	91717835	91718711	877	3.71798	0.0327671	3.35607	0.25504
chr10	131615328	131615867	540	4.28792	0.0327777	1.11388	0.0570221
chr3	127991419	127991924	506	4.83201	0.0327862	0.561751	0.0197226
chr11	84740348	84740944	597	2.2967	0.032802	0.374501	0.0762213
chr12	128146408	128147301	894	4.22212	0.0328425	1.48356	0.0794918
chr19	33463502	33464377	876	4.22212	0.0328546	0	0
chr1	40532854	40533200	347	-2.87155	0.0328574	1.48356	10.8575
chr7	2901837	2902692	856	2.87685	0.0328627	0	0
chr1	229559515	229559806	292	4.02521	0.0328835	1.1235	0.0690023
chr12	57481296	57481728	433	4.66919	0.0329062	0.18725	0.00735962
chr17	17347170	17347902	733	2.58253	0.032911	1.49319	0.249284
chr19	41714972	41716006	1035	3.0346	0.0329175	4.4555	0.543742
chr16	24436418	24437261	844	3.70636	0.0329196	0.374501	0.0286898
chr8	80402399	80403206	808	2.14212	0.0329203	6.50563	1.47383
chr2	71880286	71880615	330	4.48846	0.0329225	0.744188	0.033153
chr5	176851396	176851924	529	3.52621	0.0329823	1.10906	0.0962633
chr15	92069357	92070194	838	-2.59156	0.0330014	2.04531	12.3281
chr2	179244917	179245756	840	-4.58642	0.0330066	0.561751	13.4957
chr12	113491916	113493103	1188	2.77383	0.0330236	1.48838	0.217623
chr17	3904753	3905332	580	3.54595	0.0330236	1.68044	0.143875
chr5	68965846	68966596	751	4.78944	0.0330408	0.369688	0.0133681
chrX	153806979	153807704	726	2.67355	0.0330686	1.30113	0.20394
chr3	187220889	187221386	498	4.45194	0.0331147	2.415	0.110345
chr2	43055497	43055885	389	4.59556	0.0331186	1.85325	0.0766535
chrX	13685121	13685429	309	4.09685	0.0331326	1.48356	0.0867027
chr4	155005494	155006154	661	-3.90418	0.0331619	0.18725	2.80348
chr1	115495649	115496027	379	-3.34797	0.0331795	0.374501	3.81322
chr10	78741221	78741920	700	4.09677	0.0331992	0.18725	0.0109439
chr20	58593006	58593289	284	2.99689	0.0332033	0.18725	0.0234569
chr17	4817448	4817941	494	4.32777	0.0332076	1.68044	0.0836822
chr11	75525102	75525395	294	4.02541	0.033229	0.374501	0.0229976
chr17	81000769	81001124	356	4.85007	0.0332631	4.84926	0.168135
chr16	89449718	89450147	430	-2.81558	0.0332898	0.561751	3.95473
chr3	101007586	101009001	1416	-3.62658	0.0332912	1.11388	13.7577
chr9	12853094	12853503	410	4.02547	0.0333307	0.369688	0.0227011
chr5	38466836	38467326	491	3.9031	0.033343	2.05494	0.137357
chr15	100880377	100881016	640	2.9285	0.0333842	0.931439	0.122345
chr5	170784434	170785152	719	2.82558	0.0333969	0.931439	0.131392
chr2	94973916	94974832	917	-4.24036	0.0334337	0.749001	14.1566
chr22	25113230	25113705	476	3.26354	0.033445	12.6753	1.31988
chr11	32056116	32056849	734	3.90285	0.0335203	8.04695	0.537969
chr6	40755122	40755917	796	3.4495	0.033526	0	0
chr6	40277212	40277944	733	4.57625	0.0335403	0.18725	0.00784936
chr8	104782134	104782594	461	4.28838	0.0335504	1.85325	0.0948428
chr9	111121133	111121981	849	4.59561	0.0335559	0.18725	0.00774473
chr16	89230986	89231897	912	2.59181	0.0335643	2.23256	0.370333
chr2	47051642	47052791	1150	2.10242	0.0335776	3.16882	0.737912
chr19	13866279	13866653	375	4.15786	0.0335909	0.369688	0.0207106
chr7	151212797	151213995	1199	2.53446	0.0335961	0	0
chr3	12303458	12303967	510	3.77856	0.033598	0.931439	0.0678727
chr12	122940590	122941133	544	3.60223	0.033601	0.556938	0.0458594
chr6	39273853	39274403	551	3.72748	0.033613	0.369688	0.0279094
chr2	2547454	2548223	770	3.1045	0.0336185	7.07219	0.822253
chr5	149466088	149466876	789	2.10187	0.0336311	1.48838	0.346727
chr14	28659172	28659915	744	4.45208	0.0336357	0.374501	0.0171098
chr6	50984077	50984378	302	-4.95327	0.0336573	0.744188	23.055
chr5	146731820	146732501	682	3.09397	0.0336577	0.936252	0.109652
chr16	10954960	10955469	510	3.66162	0.0336637	1.85325	0.146446
chr17	58207617	58208280	664	2.35166	0.033688	0.18725	0.0366863
chr12	64520848	64522230	1383	2.92466	0.0337078	2.23256	0.294032
chr19	1401465	1401820	356	-4.2404	0.0337702	0.561751	10.6177
chr21	42404570	42404996	427	4.65384	0.0337819	0.374501	0.0148768
chr22	49715459	49715877	419	4.02573	0.0337954	2.24219	0.13766
chr3	126819107	126819803	697	4.22224	0.0337959	2.23256	0.119614
chr7	6557219	6557962	744	2.28409	0.0338191	0	0
chr2	229850630	229851226	597	3.0018	0.0338336	2.415	0.301499
chr4	107734121	107734600	480	-4.09076	0.0338372	5.21413	88.8433
chr5	151519926	151520630	705	-1.93394	0.0338411	3.15438	12.0527
chr5	80466601	80467839	1239	3.39974	0.0338593	0.374501	0.0354838
chr2	225582520	225583168	649	4.45214	0.0338755	0.18725	0.00855452
chr5	131579714	131580604	891	2.9485	0.0338779	0.739375	0.0957807
chr9	126903456	126904076	621	4.09503	0.0338812	6.50082	0.380401
chr2	162795358	162795669	312	-4.17794	0.0339086	0.374501	6.77855
chr14	92652001	92652684	684	2.58703	0.0339087	13.0305	2.16865
chr1	40830522	40830954	433	4.22226	0.0339093	1.11869	0.0599355
chr15	90064755	90065092	338	4.51461	0.0339224	0.931439	0.0407495
chr8	140251634	140252106	473	4.51461	0.0339227	8.37813	0.366534
chr7	132672399	132672892	494	3.92071	0.0339331	5.96313	0.393751
chr11	82945320	82946384	1065	2.8288	0.0339772	0.749001	0.105421
chr5	115394083	115394640	558	4.15768	0.0339943	0	0
chr6	39777363	39777990	628	3.30741	0.0340073	1.68044	0.169744
chr20	63121968	63122748	781	2.26709	0.034011	2.7895	0.579516
chr10	5912340	5912816	477	4.38957	0.0340235	6.50563	0.310382
chr13	21730075	21731290	1216	2.28963	0.034071	0.18725	0.038298
chr16	71403726	71404760	1035	2.98312	0.034079	1.85806	0.234991
chr22	23213255	23213649	395	4.72429	0.0340872	0	0
chr20	46583263	46583689	427	4.61307	0.0341204	1.48838	0.0608191
chr12	122130055	122130611	557	2.55542	0.034126	1.10906	0.188668
chr6	706822	707379	558	-3.90616	0.0341343	0.739375	11.085
chrX	119476667	119477456	790	4.90668	0.0341353	1.30113	0.0433771
chr5	133801437	133802220	784	2.46157	0.0341447	7.06257	1.28221
chr19	33939808	33940410	603	4.15761	0.0341642	2.05494	0.115142
chr17	82863998	82864265	268	3.77964	0.0341956	4.28751	0.31219
chr7	149431617	149432217	601	3.3061	0.0342203	1.29631	0.131062
chr7	506328	506821	494	2.61034	0.0342216	3.15438	0.516563
chr2	476055	476661	607	4.38956	0.0342378	2.7895	0.133088
chr20	47075351	47075713	363	4.53679	0.034241	21.5622	0.928932
chr22	32680269	32680752	484	-1.95734	0.0342489	2.61188	10.1431
chr9	120171327	120172787	1461	2.68258	0.0342705	1.68044	0.261749
chr16	79962995	79964181	1187	3.33558	0.0342842	0.374501	0.0370974
chr15	53898439	53899048	610	4.51479	0.0342861	10.8124	0.472972
chr5	140155857	140156141	285	4.15756	0.0342863	1.67081	0.0936222
chr7	5136152	5136613	462	3.25753	0.0343105	0	0
chrX	44896064	44896539	476	3.67598	0.0343572	4.08582	0.319668
chr19	10736625	10737485	861	2.89068	0.0343717	13.3858	1.80494
chr17	80872350	80873248	899	2.4805	0.0343843	4.30195	0.770831
chr19	2334325	2334722	398	4.09565	0.03439	2.61188	0.15277
chr9	88829446	88830272	827	2.15865	0.034424	0.739375	0.165595
chr14	99698614	99699834	1221	2.11003	0.0344333	0	0
chr3	96754662	96755091	430	4.57685	0.0344455	0.18725	0.0078461
chr19	3115299	3115978	680	3.68569	0.0344679	1.11388	0.0865632
chr19	48606417	48607178	762	2.82759	0.0344756	3.88894	0.547825
chr2	62621590	62622001	412	4.66892	0.0344891	0.931439	0.0366159
chr21	43021873	43022557	685	3.03907	0.0344997	0.369688	0.0449761
chr10	30399211	30399972	762	3.65007	0.0345166	0.931439	0.0741951
chr20	49726114	49726708	595	4.66892	0.0345168	1.11388	0.0437878
chr19	38924977	38925759	783	2.96236	0.0345173	0.374501	0.04805
chr21	42557347	42557728	382	4.4523	0.0345398	0.556938	0.0254407
chr9	136098544	136098907	364	3.52236	0.0345398	15.6087	1.35841
chr8	23325711	23326480	770	3.49492	0.0345402	0.18725	0.0166091
chr10	98444536	98445870	1335	2.51895	0.0345521	0	0
chr2	240734784	240735486	703	2.23592	0.0345565	1.48838	0.315962
chr1	40825762	40826536	775	3.22644	0.0345634	0.18725	0.0200063
chr2	135682806	135683646	841	3.96008	0.0345764	1.29631	0.0832929
chr11	1232358	1233099	742	3.78032	0.0345782	4.64757	0.338249
chr11	14422293	14422844	552	-3.14855	0.0345861	1.498	13.2837
chr12	69066585	69067341	757	-2.09986	0.0345879	1.68044	7.2035
chr19	8655431	8656363	933	2.88191	0.034601	1.48838	0.201916
chr8	85979115	85980010	896	2.4925	0.0346148	0.926625	0.164659
chr20	55248435	55249317	883	2.46162	0.0346286	0.369688	0.067114
chr16	3203735	3204469	735	-4.54098	0.0346355	0.744188	17.3243
chr14	88176898	88177552	655	4.38954	0.0346439	4.64275	0.22151
chr15	40918261	40919114	854	3.3524	0.0346515	0.744188	0.0728634
chr20	53542658	53543224	567	4.38954	0.034659	0.556938	0.026572
chr16	23888191	23889226	1036	2.21846	0.0346925	2.98157	0.640652
chr7	158252352	158253061	710	2.88219	0.0346989	2.40538	0.326254
chr1	22564482	22565236	755	2.50912	0.034752	1.49319	0.262298
chr22	25351854	25352469	616	4.32708	0.034769	0.556938	0.0277476
chr12	29112512	29113225	714	4.51503	0.0348008	0	0
chr6	36686311	36686709	399	2.96295	0.0348015	5.37732	0.68965
chr8	101689334	101689914	581	2.58422	0.0348238	0	0
chr11	64885525	64885933	409	-3.75045	0.0348326	0	0
chr17	4137615	4138329	715	4.09493	0.0348343	2.97194	0.173918
chr6	15429736	15430066	331	3.72261	0.0348457	2.415	0.182936
chr17	58951617	58951970	354	3.02708	0.0348597	0.556938	0.0683226
chr9	133707629	133708216	588	3.48916	0.0348607	2.7895	0.24842
chr19	45297564	45298417	854	2.19989	0.0348655	2.60707	0.567437
chr11	6402581	6403146	566	3.67511	0.0348667	0.744188	0.0582593
chr9	100722792	100723808	1017	3.16151	0.0348725	5.02688	0.561809
chr15	85706881	85707298	418	-3.90762	0.0348783	3.90819	58.6526
chr9	35956749	35958263	1515	2.13263	0.0348789	2.7895	0.636122
chr19	45358918	45359583	666	3.40646	0.0349108	31.2126	2.94363
chr19	784529	784964	436	4.5151	0.0349298	2.42463	0.106039
chr10	133554637	133556025	1389	2.22419	0.0349403	17.1741	3.67557
chr19	51468084	51468954	871	2.54603	0.0349482	4.26825	0.730833
chr15	74639784	74640269	486	4.59574	0.0349927	0.18725	0.00774402
chr1	159836397	159837023	627	4.26541	0.0350176	0	0
chr4	85743249	85743636	388	-3.9079	0.0350291	3.54813	53.2591
chr5	178383036	178383332	297	3.7286	0.0350352	0.561751	0.0423763
chr2	217911222	217911723	502	3.66614	0.0350443	3.35607	0.26437
chr5	132831215	132831525	311	4.2224	0.0350757	1.48838	0.0797341
chr1	217320212	217320563	352	4.38952	0.0350918	1.85806	0.0886512
chr16	72864910	72865974	1065	2.66773	0.0350961	6.89457	1.08502
chr16	3249358	3249945	588	3.18473	0.0351068	0.926625	0.101907
chr9	108704316	108704974	659	4.2224	0.035154	0.561751	0.0300936
chr20	49241987	49242344	358	4.45246	0.0351753	0.374501	0.0171052
chrX	40845320	40846045	726	3.67456	0.0351957	1.10906	0.0868567
chr1	26118682	26119141	460	-4.05824	0.0351998	0	0
chr9	126014058	126014785	728	3.45762	0.0352106	0.744188	0.0677387
chr10	71148782	71149225	444	4.59577	0.035224	7.80194	0.322655
chr16	81160422	81161025	604	3.74703	0.0352273	4.27307	0.318252
chr7	106681757	106682155	399	3.78143	0.0352287	0.561751	0.0408526
chr11	134436082	134437200	1119	3.28543	0.0352509	0.931439	0.0955303
chr11	87463535	87463962	428	2.65867	0.035253	2.04531	0.323907
chr5	179535508	179535983	476	3.67879	0.0352601	1.29631	0.101224
chr12	106066394	106067554	1161	2.4345	0.0352811	0.561751	0.103917
chr19	17965766	17966522	757	2.78758	0.0353018	0.18725	0.0271192
chr16	1480947	1481574	628	3.24039	0.0353193	5.02207	0.531407
chr1	27403088	27403720	633	4.26515	0.0353201	0.931439	0.0484414
chr2	72005569	72007038	1470	2.30497	0.0353679	1.67081	0.338113
chr11	71267817	71268046	230	4.55604	0.0353718	1.30113	0.0553116
chr11	77877426	77878817	1392	3.26305	0.0354012	0.931439	0.0970236
chr8	140105593	140106043	451	3.66381	0.0354024	0.374501	0.0295486
chr10	10967140	10967878	739	-3.5408	0.03542	1.29631	15.0867
chr17	82743401	82744296	896	2.39777	0.0354227	2.23256	0.423645
chr2	182105693	182106771	1079	3.45065	0.0354623	6.72657	0.61524
chr1	204313208	204313647	440	3.61912	0.0355074	3.17363	0.258281
chr3	123688037	123688804	768	2.14304	0.03551	0.931439	0.210879
chr11	69001421	69002118	698	3.40962	0.035523	9.48238	0.89232
chr1	210360820	210361167	348	-4.24059	0.0355474	10.9659	207.295
chr6	10633055	10633658	604	2.53176	0.0355619	0.744188	0.128691
chr11	75841022	75841538	517	2.38486	0.0355632	4.64757	0.889837
chr10	114312475	114313283	809	3.00271	0.0355722	4.46994	0.557694
chr9	130354290	130354820	531	2.58682	0.0355732	2.41982	0.402785
chr6	110678638	110679156	519	4.63876	0.035587	0.374501	0.015033
chr9	131865926	131866345	420	4.22245	0.0356055	1.48356	0.0794732
chr19	46408559	46408956	398	-4.09194	0.0356085	9.87132	168.334
chr2	219482355	219483179	825	2.73338	0.0356114	0.931439	0.140064
chr12	51915904	51916327	424	3.45271	0.0356198	2.7895	0.254776
chr5	142855186	142855920	735	-4.28816	0.0356233	2.04531	39.96
chr3	65979768	65980072	305	-4.12102	0.0356328	1.30594	22.7234
chr2	85790588	85791009	422	4.28952	0.0356501	11.1773	0.571558
chr2	231320657	231321917	1261	-1.97109	0.0356551	2.60707	10.2213
chr12	64875135	64875733	599	4.38949	0.0356898	0.926625	0.0442115
chr10	130742211	130742734	524	4.26483	0.035691	1.86288	0.0969043
chr12	88217587	88218898	1312	-2.86761	0.035746	1.666	12.1594
chr3	126544323	126545124	802	2.16232	0.0357741	1.85806	0.415084
chr6	44642884	44643301	418	3.72265	0.0357816	1.67081	0.12656
chr10	123619993	123620987	995	3.73959	0.0358	2.40538	0.180075
chr7	27468188	27468957	770	4.28961	0.0358108	3.34163	0.170867
chr20	53090038	53090616	579	3.9605	0.0358207	0.739375	0.0474937
chr3	69535263	69535951	689	3.54369	0.0358259	0.18725	0.016057
chr3	64754860	64755150	291	2.12325	0.0358285	0.556938	0.127833
chr4	105414822	105415877	1056	2.36264	0.0358339	3.72575	0.724415
chr5	54753107	54753573	467	3.85261	0.0358362	4.10026	0.283831
chr3	140650988	140652156	1169	2.25156	0.0358401	0.374501	0.0786437
chr10	123661773	123662127	355	4.8926	0.0358518	1.10906	0.0373368
chr3	50171846	50172413	568	4.02682	0.035869	1.68044	0.103093
chr1	53509865	53510496	632	4.22249	0.0358791	0.374501	0.0200612
chr7	135923698	135924054	357	-3.9095	0.0358931	0	0
chr3	2875597	2876283	687	4.49213	0.0358985	1.29631	0.0576028
chr12	50031276	50031932	657	3.57511	0.0359073	0.374501	0.0314222
chr2	134139996	134140757	762	-3.92256	0.0359184	1.31075	19.8759
chr4	84482105	84483080	976	3.45112	0.0359203	0.926625	0.0847254
chr13	32592291	32592840	550	4.53657	0.0359495	1.86288	0.0802675
chr9	98324142	98325150	1009	2.1699	0.0359504	3.15919	0.702052
chr5	143350934	143351381	448	3.93184	0.0359727	6.88494	0.451127
chr3	14165114	14165621	508	3.45119	0.0359905	2.78469	0.254604
chr5	10275787	10276748	962	2.09954	0.0359916	0.556938	0.129951
chr2	9655466	9655828	363	3.67323	0.0360145	0.18725	0.0146781
chr22	37898703	37899086	384	-4.42462	0.036017	2.78469	59.8026
chr1	156388529	156388891	363	3.56113	0.0360311	2.04531	0.173282
chr22	45521186	45521650	465	2.62163	0.0360449	1.48356	0.241055
chr10	128481213	128482174	962	4.3576	0.03607	1.30594	0.0637022
chr5	16791001	16791396	396	-4.20201	0.0360753	0.926625	17.0543
chr4	3239020	3239550	531	4.28975	0.0360849	1.48838	0.0760975
chr5	168814618	168815222	605	3.4153	0.0360871	6.32801	0.593141
chr14	95178603	95178967	365	4.38947	0.0360956	0.369688	0.017639
chr2	73227472	73227905	434	3.48913	0.0361045	0.369688	0.0329233
chr6	6157858	6158470	613	4.17107	0.0361276	0.926625	0.0514383
chr16	11178558	11178920	363	3.9604	0.0361281	0.749001	0.0481153
chr12	54958062	54958441	380	-2.34129	0.0361348	0.931439	4.72013
chr17	68234995	68235301	307	3.72267	0.0361476	1.666	0.126194
chr22	47091880	47092374	495	4.4527	0.0361746	35.1593	1.60563
chr17	79275284	79275972	689	3.56107	0.0361817	0.744188	0.0630512
chr10	133458439	133458898	460	4.09774	0.0361927	0.936252	0.0546827
chr7	50648509	50649005	497	4.51568	0.0362079	1.67081	0.0730421
chr20	24736964	24737537	574	3.96037	0.0362254	1.29631	0.083276
chr1	107161385	107161705	321	2.65377	0.0362338	0.739375	0.11749
chr20	40862716	40863044	329	3.85786	0.0362401	0.18725	0.0129149
chr20	31844170	31844850	681	2.55732	0.0362682	1.48356	0.252045
chr1	156632220	156632932	713	2.09442	0.0362846	0.18725	0.043847
chr5	140221438	140221938	501	3.89908	0.0363334	2.59744	0.174103
chr9	124447560	124448468	909	2.19324	0.036386	1.30113	0.284504
chr11	118198176	118198614	439	-2.04837	0.036396	0.556938	2.30371
chr12	124545175	124545841	667	2.71575	0.0364138	0.749001	0.114014
chr21	44967537	44968028	492	2.89513	0.0364205	1.86288	0.250416
chr13	24058675	24059375	701	4.72431	0.0364428	0.926625	0.0350545
chr20	3681563	3682457	895	2.10982	0.0364453	6.50563	1.5072
chr16	6020610	6021381	772	2.78829	0.03645	2.23256	0.323181
chr14	101503565	101504451	887	2.16122	0.0364585	0.556938	0.124513
chr13	38666452	38666902	451	4.15665	0.0364963	6.51044	0.365036
chr5	96775615	96776134	520	-4.48963	0.0364998	0.744188	16.7185
chr5	58827877	58828509	633	4.38945	0.0365177	0.936252	0.0446722
chr1	89608996	89610619	1624	2.48539	0.0365287	1.30113	0.23235
chr4	188633566	188634099	534	-4.60781	0.0365369	0.18725	4.56575
chr11	65219499	65220184	686	2.20301	0.036537	0.744188	0.161626
chr19	33672678	33673218	541	4.09814	0.0365571	0.926625	0.0541054
chr15	68479916	68481095	1180	2.58844	0.0365846	1.67081	0.277799
chr17	66434204	66434945	742	2.78165	0.0365897	8.00845	1.16463
chr17	2035554	2036301	748	2.72672	0.0365984	1.67563	0.253135
chr5	154603914	154604673	760	2.28993	0.0366042	1.67081	0.341658
chr20	24327177	24327864	688	-4.54221	0.0366131	0.739375	17.2268
chr8	140694515	140695045	531	3.66528	0.0366451	0.374501	0.0295183
chr14	23377789	23378396	608	2.60475	0.0366479	0.931439	0.153125
chr2	160516759	160517322	564	3.89867	0.0366571	1.30113	0.0872375
chr12	14937734	14938394	661	-2.18125	0.0366665	1.29631	5.87938
chr9	109779223	109780398	1176	2.34066	0.0366717	0.374501	0.0739339
chr16	82987624	82988199	576	4.6546	0.0366725	0	0
chr7	2883110	2883540	431	3.07318	0.036707	5.95351	0.707381
chr6	39046414	39046970	557	4.02723	0.0367167	3.73057	0.228801
chr17	56619332	56620221	890	2.14831	0.0367206	13.2033	2.97836
chr7	102289705	102290106	402	-1.96798	0.0367219	0.561751	2.19768
chr1	1386864	1387929	1066	2.44017	0.0367416	2.04531	0.376873
chr2	60655022	60655742	721	4.45283	0.0367421	0.744188	0.0339819
chr10	119427410	119428563	1154	3.36506	0.036759	6.31357	0.612761
chr3	127717429	127718574	1146	2.62204	0.0367681	0.749001	0.121666
chr15	77669180	77669595	416	4.15654	0.0367705	0.749001	0.0419991
chr15	50845800	50846566	767	3.66569	0.0367761	2.60707	0.205432
chr7	899717	900295	579	2.2909	0.0367848	3.5385	0.723088
chr20	54887781	54888136	356	2.63221	0.0367928	8.20051	1.32272
chr2	239526310	239526918	609	4.45284	0.0367937	0.374501	0.0171007
chr20	59390790	59391381	592	2.27209	0.0368155	1.30594	0.270368
chr9	74925693	74926649	957	4.65464	0.0368171	0.926625	0.0367891
chr6	37591075	37591554	480	4.22259	0.036828	0.18725	0.0100299
chr16	11985537	11986193	657	3.53189	0.0368693	5.41101	0.467813
chr16	68061821	68062565	745	4.09281	0.0368838	1.67563	0.0982017
chr11	47406892	47407147	256	-3.29701	0.0369075	0.739375	7.26712
chr16	55693777	55694573	797	4.59592	0.0369077	0.739375	0.0305743
chr2	64867423	64867835	413	4.29017	0.0369216	0.556938	0.0284667
chr10	21225297	21226837	1541	2.1945	0.036965	0	0
chr1	183072275	183073010	736	-4.09278	0.03697	0.561751	9.58502
chr7	141217830	141218872	1043	2.26844	0.03698	15.6183	3.24165
chr5	171527164	171527807	644	2.92167	0.0369831	64.173	8.46917
chr18	2480448	2481042	595	-2.18005	0.0370459	50.845	230.413
chr17	77817963	77818293	331	4.0274	0.0370677	0.18725	0.011483
chr9	131107190	131107609	420	2.69265	0.0370845	1.29631	0.200513
chr2	149606426	149606759	334	-4.49089	0.037124	2.23256	50.1991
chr9	128285364	128286001	638	2.21928	0.0371446	0	0
chr2	227462702	227462940	239	3.21007	0.0371791	2.97675	0.321674
chr6	33798801	33799284	484	3.89802	0.0371805	0.374501	0.0251206
chr22	21017027	21017689	663	4.22263	0.0371868	2.0405	0.109295
chr17	67572909	67573865	957	2.27258	0.0371925	0.926625	0.191774
chr6	137271603	137271929	327	-4.54255	0.0372138	8.00845	186.635
chr8	81291079	81291504	426	3.45242	0.0372399	74.9709	6.84874
chr6	150659234	150659640	407	-4.31866	0.0372797	20.7891	414.843
chr12	109185911	109186716	806	3.73028	0.037291	0.374501	0.0282179
chr14	59704485	59704928	444	4.89269	0.0372959	0.374501	0.0126068
chr6	42193606	42193873	268	3.74754	0.0373035	0	0
chr17	57649481	57650092	612	2.32441	0.0373178	0.744188	0.148582
chr11	124900488	124900901	414	-3.14559	0.0373276	0.18725	1.65706
chr20	33710389	33710977	589	3.96003	0.0373401	1.30113	0.0836047
chr7	41522520	41523069	550	-4.60889	0.0373473	2.60225	63.4985
chr20	56886069	56886506	438	3.32477	0.0373539	0.744188	0.0742722
chr5	148739034	148739995	962	3.26713	0.0373543	0.931439	0.0967496
chr6	33608463	33609040	578	3.35829	0.0373585	1.1235	0.109554
chr20	23252180	23252622	443	4.15631	0.0373625	0.556938	0.0312343
chr5	99351703	99353388	1686	2.31477	0.037371	0.18725	0.0376362
chr12	56811013	56811692	680	3.42297	0.0373739	3.14956	0.293653
chr17	50526838	50527623	786	3.36507	0.0373805	0.18725	0.0181734
chr21	40471126	40471821	696	2.18826	0.0373814	1.498	0.328685
chr2	64402745	64403413	669	2.7605	0.0374047	1.1235	0.165799
[truncated: 1,000 more rows]

## Sheet: AAVS1_CUT&Tag
Seqnames	Start	End	Width	Basemean	AAVS1_Rep1	AAVS1_Rep2
chr5	178077404	178083054	5651	577.41	577.313	577.506
chr14	105031389	105034867	3479	291.252	288.974	293.529
chr21	43342370	43345535	3166	371.373	356.296	386.451
chr15	66700360	66704053	3694	179.576	159.412	199.739
chr20	44764835	44767308	2474	130.497	126.387	134.607
chr3	170356296	170359463	3168	190.612	196.248	184.976
chr20	54126378	54129100	2723	338.451	341.688	335.214
chr20	57706342	57712835	6494	306.203	299.771	312.635
chr19	45403431	45407397	3967	209.659	217.842	201.476
chr3	196342245	196344668	2424	151.293	138.454	164.133
chr17	59755037	59757246	2210	120.944	126.387	115.501
chr18	3593027	3596453	3427	112.376	125.751	99.001
chr17	75513534	75518234	4701	135.325	130.832	139.817
chr15	84914154	84915811	1658	116.615	116.86	116.37
chr19	4373795	4377003	3209	127.69	125.116	130.265
chr1	201306733	201310457	3725	127.191	130.197	124.185
chr6	43058851	43060956	2106	84.2693	82.564	85.9746
chr9	136170511	136172443	1933	75.8508	78.7534	72.9481
chr17	43360317	43361645	1329	58.9425	59.7002	58.1848
chr20	44369974	44371421	1448	84.0036	86.3747	81.6324
chr17	74124342	74126579	2238	48.4501	48.2682	48.6321
chr8	127667753	127671087	3335	141.429	154.331	128.528
chr7	74580069	74582869	2801	84.3535	84.4694	84.2377
chr18	48950838	48953238	2401	62.332	57.7948	66.8691
chr5_KI270791v1_alt	185455	188084	2630	64.14	69.2268	59.0532
chr19	55653310	55656163	2854	181.753	175.925	187.581
chr19	45455275	45456660	1386	88.7993	93.3609	84.2377
chr17	62804067	62805852	1786	64.9242	67.3215	62.527
chr5	1325947	1328851	2905	77.0367	79.3885	74.685
chr20	57747092	57749676	2585	87.4967	93.3609	81.6324
chr3	64209529	64212224	2696	235.569	237.53	233.608
chr5	75336197	75338033	1837	87.244	87.6449	86.843
chr7	135291578	135292866	1289	47.8475	44.4576	51.2374
chr12	119478264	119480320	2057	44.9571	41.282	48.6321
chr1	144101297	144105100	3804	45.2616	51.4438	39.0794
chr14	75253740	75256374	2635	148.059	153.696	142.423
chr8	124856226	124858095	1870	124.482	121.306	127.659
chr1	147170771	147174517	3747	103.699	99.712	107.685
chr10	74176078	74177794	1717	59.8758	54.6193	65.1323
chr9	133872691	133878066	5376	179.802	184.181	175.423
chr9	126660725	126663383	2659	149.194	149.885	148.502
chr19	35005435	35007796	2362	134.145	146.71	121.58
chr1	146051071	146052779	1709	81.5798	80.6587	82.5009
chr20	47690521	47698092	7572	68.3979	67.3215	69.4744
chr6	36616375	36618131	1757	86.0773	93.996	78.1587
chr19	51688834	51691419	2586	75.6111	63.5108	87.7114
chr7	158703694	158705803	2110	101.158	94.6311	107.685
chr12	131859827	131862600	2774	122.57	143.534	101.606
chr14	103847459	103849769	2311	116.381	118.13	114.633
chr2	64906655	64908305	1651	69.2339	69.8619	68.606
chr11	69479316	69481709	2394	61.8653	60.3353	63.3954
chr22	40498323	40500060	1738	50.7379	47.6331	53.8427
chr16	9047108	9048695	1588	61.7162	63.5108	59.9217
chr1	206894777	206896819	2043	61.0811	62.2406	59.9217
chr14	105039360	105044576	5217	72.105	66.0512	78.1587
chr1	120849685	120851805	2121	64.2697	59.065	69.4744
chr20	41027383	41029858	2476	141.209	146.075	136.344
chr15	40869515	40874731	5217	106.958	107.968	105.948
chr1	212485434	212487182	1749	58.3916	60.3353	56.448
chr5	139642476	139644802	2327	82.6167	84.4694	80.764
chr21	44871788	44875994	4207	81.2492	89.5502	72.9481
chr16	88760009	88767480	7472	282.127	272.461	291.793
chr11	67378805	67380270	1466	41.5027	48.2682	34.7372
chr8	100745336	100749205	3870	100.847	110.509	91.1852
chr15	74872452	74874372	1921	50.0249	60.9704	39.0794
chr15	92635795	92640234	4440	68.534	73.6725	63.3954
chr14	81533083	81534685	1603	62.5198	68.5917	56.448
chr9	127933681	127939770	6090	103.666	102.252	105.08
chr20	53788831	53796771	7941	170.697	174.655	166.739
chr1	143212414	143221884	9471	227.87	236.895	218.844
chr7	102490253	102491522	1270	112.804	109.239	116.37
chr1	145286854	145288526	1673	49.2537	53.3491	45.1584
chr15	39629474	39630696	1223	39.4483	47.6331	31.2635
chr8	102599807	102602331	2525	69.2015	72.4023	66.0007
chr11	66718240	66720954	2715	58.9555	50.1735	67.7375
chr13	30107942	30109662	1721	42.7729	50.8086	34.7372
chr19	18271030	18275947	4918	104.561	83.1992	125.922
chr16	85470115	85473203	3089	94.9301	97.8066	92.0536
chr5	146181966	146183367	1402	52.8117	55.2544	50.3689
chr8	143871462	143875641	4180	109.791	90.1853	129.396
chr9	125143019	125144584	1566	71.055	71.7672	70.3428
chr20	48297895	48300269	2375	57.0696	53.3491	60.7901
chr3	39139855	39142298	2444	50.2519	43.1873	57.3164
chr15	98889371	98891941	2571	53.4468	56.5246	50.3689
chr20	50623334	50626859	3526	135.39	125.751	145.028
chr17	7280176	7282166	1991	74.1463	76.213	72.0797
chr5	386118	387738	1621	89.0132	85.1045	92.922
chr5	134003886	134005977	2092	58.9749	57.1597	60.7901
chr1	23593153	23594659	1507	36.6552	36.8363	36.4741
chr11	69891145	69892403	1259	39.7465	41.282	38.2109
chr5	67214031	67217149	3119	91.9555	92.7258	91.1852
chr12	52146731	52150381	3651	175.188	171.479	178.897
chr8	102647340	102648906	1567	61.6838	66.0512	57.3164
chr16	2427891	2430878	2988	73.8418	66.0512	81.6324
chr9	22106763	22108359	1597	60.4785	58.4299	62.527
chr14	105090030	105092292	2263	64.6521	54.6193	74.685
chr20	51446185	51448447	2263	105.189	110.509	99.8695
chr20	54096205	54104932	8728	165.434	170.209	160.66
chr20	47659308	47682997	23690	435.487	444.576	426.399
chr16	2022624	2023939	1316	34.0305	29.8501	38.2109
chr19	45885221	45887585	2365	52.7923	48.2682	57.3164
chr1	144558778	144561445	2668	98.5854	92.0907	105.08
chr8	66665771	66668010	2240	83.0833	81.9289	84.2377
chr7	92527214	92529434	2221	67.8471	67.9566	67.7375
chr1_KI270765v1_alt	57260	58477	1218	49.1695	51.4438	46.8952
chr21	40335118	40341767	6650	105.001	99.712	110.291
chr4	168693930	168695936	2007	26.6488	29.8501	23.4476
chr12	46370932	46374530	3599	77.9052	79.3885	76.4218
chr16	90076942	90078371	1430	56.9723	60.9704	52.9742
chr12	56115962	56119767	3806	112.001	104.158	119.843
chr12	52199454	52205156	5703	138.649	134.008	143.291
chr1	161452091	161455080	2990	51.2563	49.5384	52.9742
chr3	108619208	108621185	1978	33.5639	32.3905	34.7372
chr15	89087660	89088911	1252	96.2003	100.347	92.0536
chr20	63625623	63627925	2303	47.8475	44.4576	51.2374
chr20	54148400	54150336	1937	223.729	238.166	209.292
chr2	20071021	20072914	1894	115.28	119.4	111.159
chr19	13832105	13837159	5055	100.29	94.6311	105.948
chr7	25861770	25862984	1215	117.535	121.306	113.764
chr20	10673333	10675803	2471	68.6637	63.5108	73.8166
chr9	127544547	127547225	2679	126.29	132.738	119.843
chr14	49585166	49587675	2510	72.1568	70.497	73.8166
chr6	73519997	73522517	2521	146.426	162.588	130.265
chr17	49414258	49415688	1431	53.1941	50.8086	55.5795
chr16	678599	681640	3042	101.975	90.1853	113.764
chr14	21455279	21457121	1843	67.9443	60.3353	75.5534
chr12	92145512	92147056	1545	74.2112	71.1321	77.2903
chr20	54114319	54118111	3793	46.5773	41.9171	51.2374
chr7	36152245	36153946	1702	88.4106	81.2938	95.5273
chr13	40536321	40538131	1811	75.8701	85.7396	66.0007
chr1	1079149	1081584	2436	140.652	130.197	151.107
chr9	129485281	129491541	6261	203.308	205.14	201.476
chr22	30287880	30291383	3504	63.518	58.4299	68.606
chr1	113145987	113147416	1430	20.8486	16.5128	25.1845
chr1	125178807	125184065	5259	424.444	433.779	415.11
chr17	59859549	59861386	1838	118.118	118.13	118.106
chr12	106773778	106775083	1306	44.7562	40.0118	49.5005
chr16	326397	328357	1961	194.183	188.627	199.739
chr8	91069269	91070816	1548	100.607	95.2662	105.948
chr20	41618084	41619657	1574	66.7971	73.6725	59.9217
chr9	128419957	128422491	2535	43.4017	35.5661	51.2374
chr1	180166425	180169424	3000	95.3968	95.2662	95.5273
chr15	71251353	71253152	1800	30.291	33.6607	26.9213
chr20	60077420	60079307	1888	49.338	55.2544	43.4215
chr2	27420755	27422640	1886	33.3823	38.1065	28.6582
chr16	75304467	75306735	2269	26.6488	29.8501	23.4476
chr7	99503990	99505551	1562	61.8005	65.4161	58.1848
chr8	37144395	37146265	1871	41.9694	45.7278	38.2109
chr11	66370059	66372941	2883	108.378	107.333	109.422
chr2	162343624	162344813	1190	78.2358	70.497	85.9746
chr17	60007727	60010570	2844	99.0907	103.523	94.6589
chr10	8052893	8056539	3647	125.967	115.59	136.344
chr1	148150308	148152559	2252	45.7737	36.8363	54.7111
chr5	181259917	181262864	2948	58.3074	58.4299	58.1848
chr1	43649433	43650890	1458	93.6405	88.28	99.001
chr14	77616435	77617330	896	117.295	106.063	128.528
chr14	105045518	105052769	7252	85.1571	89.5502	80.764
chr20	54129753	54135489	5737	143.97	159.412	128.528
chr3	4985050	4987756	2707	194.138	200.694	187.581
chr1	154936068	154938304	2237	76.7516	76.213	77.2903
chr2	73232376	73235781	3406	89.4993	89.5502	89.4483
chr2	127700157	127702745	2589	84.872	86.3747	83.3693
chr6	27145507	27147775	2269	58.6574	56.5246	60.7901
chr16	9090317	9092513	2197	109.019	125.116	92.922
chr1	44799520	44801108	1589	52.559	49.5384	55.5795
chr12	6942702	6947580	4879	139.148	128.927	149.37
chr9	83706446	83709174	2729	57.4065	60.9704	53.8427
chr1	201597463	201598626	1164	50.4528	44.4576	56.448
chr7	2522074	2524780	2707	108.274	98.4417	118.106
chr21	43331736	43334575	2840	165.091	146.075	184.107
chr6	6686717	6687811	1095	98.0863	97.1715	99.001
chr7	102589399	102591007	1609	108.345	109.874	106.817
chr2	96815112	96818036	2925	74.399	81.9289	66.8691
chr9	94921420	94924125	2706	38.8262	36.8363	40.8162
chr20	44692774	44693816	1043	53.5634	55.8895	51.2374
chr16	58644425	58645873	1449	24.5944	29.215	19.9739
chr3	112560746	112563026	2281	97.8336	91.4556	104.212
chr17	49763807	49764917	1111	78.1579	85.1045	71.2113
chr11	6234223	6235680	1458	59.9082	52.0789	67.7375
chr17	60106676	60108875	2200	73.9454	74.9427	72.9481
chr17	41520053	41523094	3042	60.8802	60.9704	60.7901
chr17	8434928	8437097	2170	58.1713	52.0789	64.2638
chr9	133880370	133882713	2344	64.8724	62.8757	66.8691
chr5	58449799	58453351	3553	25.6638	30.4852	20.8423
chr9	114586835	114589047	2213	95.7661	100.347	91.1852
chr1	150696736	150698324	1589	74.8657	79.3885	70.3428
chr1	148528006	148530290	2285	69.8884	78.1183	61.6585
chr20	48823107	48829206	6100	90.9186	88.9151	92.922
chr14	20612728	20614943	2216	92.9924	96.5364	89.4483
chr1	20613385	20614435	1051	45.9421	40.6469	51.2374
chr11	20035264	20037494	2231	55.0476	50.1735	59.9217
chr6	26232259	26235861	3603	61.4635	57.7948	65.1323
chr9	33289290	33291624	2335	93.0248	93.996	92.0536
chr7	39948944	39951074	2131	97.989	104.793	91.1852
chr11	65887508	65889410	1903	56.0845	53.9842	58.1848
chr2	74863680	74868836	5157	68.7673	72.4023	65.1323
chr1	109262440	109264304	1865	55.5142	47.6331	63.3954
chr8	127733365	127740552	7188	228.939	238.166	219.713
chr16	88782257	88786066	3810	71.1262	83.1992	59.0532
chr8	109333388	109335304	1917	104.45	100.347	108.554
chr9	96416805	96419882	3078	128.41	128.292	128.528
chr11	66996590	66998318	1729	74.7814	77.4832	72.0797
chr17	7349664	7352697	3034	79.6938	83.8343	75.5534
chr12	124938720	124941278	2559	85.4553	83.1992	87.7114
chr9	129177586	129180343	2758	82.7851	88.28	77.2903
chr16	31116725	31118846	2122	78.4885	76.213	80.764
chr8	25458282	25459638	1357	91.7546	91.4556	92.0536
chr16	30406595	30408397	1803	70.3033	71.1321	69.4744
chr16	72092183	72094541	2359	66.7259	62.2406	71.2113
chr20	46688727	46690267	1541	102.163	100.982	103.343
chr19	13838421	13842358	3938	92.8563	90.1853	95.5273
chr17	75523916	75527753	3838	165.331	161.317	169.344
chr9	128844623	128847666	3044	85.6368	77.4832	93.7904
chr9	95090883	95094971	4089	63.4531	63.5108	63.3954
chr1	155132961	155136888	3928	114.373	105.428	123.317
chr19	55384212	55387605	3394	81.9167	88.28	75.5534
chr15	98850606	98856477	5872	120.672	113.684	127.659
chr16	89971611	89973607	1997	45.4755	43.1873	47.7637
chrX	149538943	149541684	2742	116.031	120.035	112.027
chr7	77797546	77799913	2368	90.6398	102.252	79.0271
chr1	9112022	9113886	1865	44.2895	42.5522	46.0268
chr6	85677729	85680026	2298	58.8583	57.7948	59.9217
chr5	179609739	179614027	4289	37.2385	33.6607	40.8162
chr2	70257000	70258963	1964	54.7301	49.5384	59.9217
chr22	42613872	42616234	2363	60.9969	60.3353	61.6585
chr17	7328789	7330970	2182	70.0051	77.4832	62.527
chr20	48863903	48865587	1685	33.4666	40.0118	26.9213
chr14	52551367	52554251	2885	101.612	101.617	101.606
chr13	51452452	51454502	2051	61.4117	53.3491	69.4744
chr11	62726565	62729231	2667	110.665	106.698	114.633
chr17	75783049	75787362	4314	107.244	111.144	103.343
chr5	131633548	131636615	3068	71.7419	77.4832	66.0007
chr10	38010137	38011858	1722	56.4214	61.6055	51.2374
chr5	41903529	41904639	1111	58.3592	62.8757	53.8427
chr2	74653607	74654898	1292	59.8951	61.6055	58.1848
chr17	58638729	58641573	2845	46.0264	42.5522	49.5005
chr14	35807968	35809416	1449	45.2746	41.9171	48.6321
chr15	90157892	90158921	1030	106.608	109.874	103.343
chr11	20030509	20033311	2803	37.7439	45.0927	30.3951
chr9	137293248	137300035	6788	109.661	100.347	118.975
chr12	113220569	113222406	1838	121.274	117.495	125.054
chr15	90159922	90161743	1822	45.4755	43.1873	47.7637
chr1	228457066	228459704	2639	51.4766	57.7948	45.1584
chr2	237557753	237560121	2369	74.0103	69.8619	78.1587
chr1	234599359	234602434	3076	55.7863	60.3353	51.2374
chr9	120867884	120869828	1945	110.413	100.982	119.843
chr19	13845827	13848642	2816	91.787	88.9151	94.6589
chr20	57325968	57328354	2387	69.6681	69.8619	69.4744
chr10	103916482	103919026	2545	66.1232	58.4299	73.8166
chr2	30145966	30147399	1434	111.398	100.347	122.449
chr16	30525666	30528671	3006	96.9003	96.5364	97.2642
chr12	52969103	52973887	4785	172.699	170.844	174.554
chr21	8229872	8247459	17588	373.622	384.24	363.004
chr5	176645760	176647931	2172	67.9637	67.3215	68.606
chr1	19595768	19598195	2428	86.8615	92.0907	81.6324
chr8	144767108	144768948	1841	80.1799	88.28	72.0797
chr5	151771119	151772828	1710	111.352	112.414	110.291
chr20	50165038	50166935	1898	80.478	81.9289	79.0271
chr20	62121045	62122609	1565	124.268	129.562	118.975
chr17	27332364	27333899	1536	52.5783	56.5246	48.6321
chr10	3783754	3786187	2434	90.8343	87.0098	94.6589
chr6	170025058	170027120	2063	54.6976	52.0789	57.3164
chr1	112704319	112706258	1940	55.4688	59.7002	51.2374
chr12	53451745	53453094	1350	53.6801	55.2544	52.1058
chr11	3421832	3423918	2087	105.591	113.049	98.1326
chr17	43288852	43290923	2072	55.3327	53.3491	57.3164
chr9	35070665	35073674	3010	68.3979	67.3215	69.4744
chr22	28798825	28801198	2374	101.806	86.3747	117.238
chr9	79570978	79573134	2157	84.8202	81.9289	87.7114
chr1	143239302	143240631	1330	23.1039	18.4181	27.7898
chr20	18057484	18059442	1959	52.8247	45.7278	59.9217
chrX	47649809	47651674	1866	70.9059	74.9427	66.8691
chr11	64841583	64845560	3978	80.6271	78.7534	82.5009
chr19	50205028	50206367	1340	67.7304	68.5917	66.8691
chr16	88924609	88929775	5167	173.289	184.181	162.396
chr18	11980515	11982176	1662	95.4486	99.712	91.1852
chr9	137168029	137170949	2921	65.3066	62.8757	67.7375
chr16	67403883	67405780	1898	65.1057	61.6055	68.606
chr7	151038495	151040460	1966	53.7837	64.1459	43.4215
chr2	214808753	214810995	2243	110.847	100.982	120.712
chr10	28302245	28304010	1766	65.2548	58.4299	72.0797
chr14	105299448	105302140	2693	132.233	126.387	138.08
chr21	39182351	39184585	2235	96.4337	99.0769	93.7904
chr1	155123501	155130632	7132	181.954	177.195	186.712
chr2	11572844	11578457	5614	58.5083	59.7002	57.3164
chr19	49928263	49930434	2172	64.6715	61.6055	67.7375
chr2	156331434	156335941	4508	106.071	100.982	111.159
chr8	26448150	26452296	4147	98.2872	98.4417	98.1326
chr2	11539022	11547529	8508	166.115	159.412	172.818
chr4	37685004	37687427	2424	83.9193	84.4694	83.3693
chr9	65674681	65676986	2306	60.0312	67.9566	52.1058
chr1	149926708	149929031	2324	44.3089	49.5384	39.0794
chr21	44428279	44429105	827	77.8858	72.4023	83.3693
chr19	45450152	45452057	1906	56.4993	46.998	66.0007
chr20	47326015	47332082	6068	122.681	126.387	118.975
chr11	65013196	65015103	1908	42.1509	40.0118	44.2899
chr16	586446	591673	5228	142.693	140.359	145.028
chr14	54509193	54510692	1500	65.1251	68.5917	61.6585
chr17	43277554	43278951	1398	87.9115	86.3747	89.4483
chr1	41860931	41863451	2521	34.5683	38.7416	30.3951
chr1	44729776	44731702	1927	41.3667	41.9171	40.8162
chr1	228139285	228141473	2189	84.2693	82.564	85.9746
chr1	228636670	228638837	2168	38.0096	41.282	34.7372
chr5	80254308	80257978	3671	63.2328	55.2544	71.2113
chr5	180809426	180812634	3209	73.5955	76.8481	70.3428
chr13	49443398	49445116	1719	82.1631	77.4832	86.843
chr8	86513694	86515674	1981	69.0848	73.0374	65.1323
chrX	115731441	115733695	2255	111.553	113.684	109.422
chr13	110711843	110713860	2018	63.3882	68.5917	58.1848
chr5	178112932	178115230	2299	65.1057	61.6055	68.606
chr16	84998777	85001684	2908	54.8855	62.8757	46.8952
chr15	92903757	92905863	2107	95.2152	100.982	89.4483
chr13	51583817	51585389	1573	100.406	93.996	106.817
chr19	49117845	49120540	2696	57.0696	53.3491	60.7901
chr17	50857902	50862360	4459	52.4941	54.6193	50.3689
chr17	62716472	62719516	3045	67.2962	68.5917	66.0007
chr9	137226144	137227981	1838	85.3711	81.2938	89.4483
chrUn_GL000220v1	133101	135873	2773	108.948	113.684	104.212
chr1	151510025	151515280	5256	146.251	142.264	150.238
chr1	115712493	115715775	3283	146.873	153.061	140.686
chr1	181132978	181136588	3611	80.6402	69.2268	92.0536
chr21	42973444	42975067	1624	138.87	142.264	135.475
chr12	131949167	131951406	2240	85.9219	80.6587	91.1852
chr6	27888922	27893905	4984	83.1351	86.3747	79.8956
chr1	143728250	143730338	2089	83.7702	87.6449	79.8956
chr9	129480563	129485101	4539	111.119	113.684	108.554
chr1	23554203	23560591	6389	143.75	151.156	136.344
chr11	62705099	62707156	2058	54.2958	49.5384	59.0532
chr2	11581090	11587453	6364	84.7166	73.0374	96.3957
chr20	50660293	50663911	3619	65.6435	70.497	60.7901
chr19	40570048	40571403	1356	90.1862	95.2662	85.1061
chr16	2204916	2206837	1922	34.0499	36.8363	31.2635
chr2	16817060	16818655	1596	17.1416	17.783	16.5002
chr12	71754279	71756554	2276	43.972	41.9171	46.0268
chr9	113136597	113138544	1948	56.9529	53.9842	59.9217
chr7	1531109	1537910	6802	246.91	241.976	251.845
chr2	65129350	65131333	1984	83.6666	78.7534	88.5799
chr3	120742016	120743467	1452	49.3834	43.1873	55.5795
chr10	102713247	102716019	2773	105.474	113.684	97.2642
chr17	50177267	50179377	2111	67.5295	67.3215	67.7375
chr6	89080331	89083424	3094	73.4594	70.497	76.4218
chr5	43312452	43314276	1825	65.7602	69.8619	61.6585
chr5	173328185	173330977	2793	105.753	100.347	111.159
chr6	73512249	73516304	4056	53.0968	58.4299	47.7637
chrX	154377901	154379944	2044	138.721	145.44	132.001
chr3	63862087	63865751	3665	91.7352	84.4694	99.001
chr9	33233086	33235526	2441	39.578	37.4714	41.6846
chr17	43299548	43300987	1440	90.5816	81.2938	99.8695
chr16	30650029	30652216	2188	64.8206	58.4299	71.2113
chr1	58575564	58578156	2593	60.31	54.6193	66.0007
chr1	153956883	153960263	3381	66.9786	67.9566	66.0007
chr9	131544984	131547954	2971	79.0587	82.564	75.5534
chr20	54266865	54269735	2871	109.466	115.59	103.343
chr6	89828555	89830503	1949	57.8407	60.9704	54.7111
chr2	28390535	28394050	3516	113.154	107.333	118.975
chr16	592665	594784	2120	46.4606	42.5522	50.3689
chr14	34872975	34875798	2824	53.3301	57.1597	49.5005
chr20	63681274	63683412	2139	79.7069	74.3076	85.1061
chr17	62477036	62480252	3217	83.5824	76.8481	90.3167
chr9	35813546	35816005	2460	82.377	69.2268	95.5273
chr12	104285953	104287720	1768	40.4464	37.4714	43.4215
chr6	27806473	27809285	2813	88.093	80.6587	95.5273
chr9	127566978	127570700	3723	61.3469	58.4299	64.2638
chr12	76763301	76765471	2171	62.0856	68.5917	55.5795
chr5	56428813	56429907	1095	51.4897	48.2682	54.7111
chr7	72827392	72830572	3181	124.521	135.278	113.764
chr16	81005862	81009019	3158	107.062	116.86	97.2642
chr19	45576486	45578882	2397	55.7021	58.4299	52.9742
chr7	2353606	2355046	1441	35.4174	31.7554	39.0794
chr5	139146203	139149621	3419	63.5373	65.4161	61.6585
chr2	128304249	128308499	4251	103.245	92.7258	113.764
chr12	133129680	133131027	1348	39.8307	43.1873	36.4741
chr1	156766492	156768903	2412	62.8374	69.2268	56.448
chr11	64239883	64242884	3002	175.052	165.128	184.976
chr19	16462446	16465185	2740	89.5317	87.0098	92.0536
chr8	127741496	127744417	2922	69.0655	66.0512	72.0797
chr20	41339414	41341968	2555	101.631	108.603	94.6589
chr17	64144857	64148350	3494	102.999	103.523	102.475
chr11	65381353	65383640	2288	62.8698	66.6863	59.0532
chr8	60650983	60654515	3533	66.2787	71.7672	60.7901
chr2	200888447	200890444	1998	50.9582	55.8895	46.0268
chr11_KI270832v1_alt	35766	37231	1466	63.9197	60.9704	66.8691
chr1	203088793	203090211	1419	51.2888	46.998	55.5795
chr14	24365208	24367934	2727	58.2231	56.5246	59.9217
chr4	1008565	1011702	3138	62.9347	61.6055	64.2638
chr17	61553969	61555972	2004	39.714	43.8225	35.6056
chr16	2459037	2460753	1717	42.4036	45.7278	39.0794
chr16	3009031	3010790	1760	54.4643	53.3491	55.5795
chr1	145857697	145860452	2756	93.0635	107.968	78.1587
chr20	62936124	62940014	3891	87.5291	90.8205	84.2377
chr14	49861580	49863701	2122	94.1135	102.252	85.9746
chr1	228629476	228633692	4217	71.2235	75.5779	66.8691
chr16	74984262	74986037	1776	59.0591	59.065	59.0532
chr11	9459316	9462490	3175	53.9652	58.4299	49.5005
chr14	35824785	35827454	2670	101.612	101.617	101.606
chr5	138330995	138332502	1508	43.2851	36.2012	50.3689
chr17	3753934	3755758	1825	141.909	142.264	141.554
chr1	228611653	228614247	2595	36.1043	37.4714	34.7372
chr15	63047050	63050013	2964	70.3163	61.6055	79.0271
chr5	178152506	178154518	2013	134.171	127.657	140.686
chr10	63628780	63631291	2512	72.3577	71.7672	72.9481
chr16	85890994	85892439	1446	29.6235	34.9309	24.316
chr16	1941102	1943845	2744	42.5009	38.1065	46.8952
chr12	105860069	105862039	1971	70.4199	70.497	70.3428
chr4	3954229	3956557	2329	148.15	129.562	166.739
chr9	133512706	133514105	1400	21.9698	22.2288	21.7108
chr16	69725239	69727435	2197	77.97	74.3076	81.6324
chr13	46552591	46555240	2650	63.168	60.3353	66.0007
chr6	27864636	27868882	4247	75.3647	74.3076	76.4218
chr14	68306369	68307997	1629	52.3257	50.8086	53.8427
chr19	38836768	38840698	3931	88.08	90.1853	85.9746
chr5	160118726	160120845	2120	103.796	92.0907	115.501
chr16	87944779	87946462	1684	123.031	124.481	121.58
chr11	72812626	72815478	2853	83.3491	78.1183	88.5799
chr14	73026397	73028148	1752	46.1106	44.4576	47.7637
chr7	73826826	73834149	7324	223.93	196.883	250.976
chr12	89708013	89710644	2632	104.165	97.1715	111.159
chr17	81328074	81330855	2782	79.3569	76.213	82.5009
chr10	110917962	110919989	2028	86.3818	104.158	68.606
chr7	143835753	143837757	2005	130.684	137.183	124.185
chr20	57350941	57352321	1381	63.7189	59.7002	67.7375
chr2	197498559	197501293	2735	77.5034	76.8481	78.1587
chr10	70145132	70147477	2346	55.067	57.1597	52.9742
chr10	6295725	6298821	3097	68.2295	63.5108	72.9481
chr1	108456145	108458148	2004	39.0789	42.5522	35.6056
chr8	125068726	125071188	2463	41.386	48.9033	33.8688
chr17	75808000	75810892	2893	49.9213	52.0789	47.7637
chr2	61763616	61765097	1482	86.6089	86.3747	86.843
chr3	139389043	139390731	1689	51.6063	47.6331	55.5795
chr9	132240639	132241808	1170	75.8832	76.213	75.5534
chr20	51741356	51746056	4701	104.671	108.603	100.738
chr19	45505733	45510238	4506	73.5437	72.4023	74.685
chr1	169104895	169107901	3007	71.1717	71.1321	71.2113
chr6	109381160	109383934	2775	84.386	81.9289	86.843
chr1	62435711	62437697	1987	69.8366	73.6725	66.0007
chr16	29862293	29863863	1571	44.6589	47.6331	41.6846
chr9	127978689	127982174	3486	98.3714	100.347	96.3957
chr19	36113862	36116471	2610	111.767	105.428	118.106
chr21	43710899	43713359	2461	76.3692	80.6587	72.0797
chr11	67239158	67241856	2699	83.1027	88.9151	77.2903
chr1	58782884	58786134	3251	104.373	114.955	93.7904
chr19	14494795	14498066	3272	72.1892	67.9566	76.4218
chr9	122264304	122266285	1982	50.7055	50.1735	51.2374
chr1	15834025	15836744	2720	75.0278	66.6863	83.3693
chr3	185585455	185587492	2038	73.0446	77.4832	68.606
chr17	62778056	62783318	5263	172.42	184.181	160.66
chr4	6695492	6697416	1925	33.6287	27.3096	39.9478
chr4	39538624	39541193	2570	44.594	52.714	36.4741
chr22_KI270733v1_random	23733	25238	1506	78.0606	92.7258	63.3954
chr9	136948991	136951533	2543	61.7487	60.9704	62.527
chr2	113437331	113438780	1450	49.8501	40.6469	59.0532
chr3	195906968	195910571	3604	58.7092	60.9704	56.448
chr11	70232725	70234487	1763	94.8977	100.347	89.4483
chr14	20468755	20470908	2154	56.6029	55.8895	57.3164
chr17	26880787	26886002	5216	122.778	118.765	126.791
chr14	61279712	61282083	2372	82.1825	84.4694	79.8956
chr1	156212625	156213833	1209	38.5799	47.6331	29.5266
chr9	89603127	89608252	5126	126.167	116.86	135.475
chr20	49286272	49290414	4143	64.1206	62.2406	66.0007
chr17	4141781	4144521	2741	59.96	56.5246	63.3954
chr5	96661591	96663926	2336	53.4144	59.065	47.7637
chr17	7577763	7580560	2798	37.3033	28.5799	46.0268
chr7	81478090	81479420	1331	53.894	46.998	60.7901
chr12	52279622	52281809	2188	85.7728	83.8343	87.7114
chr4	173333794	173335823	2030	76.2656	71.7672	80.764
chr19	506399	508160	1762	35.1516	35.5661	34.7372
chr7	105531166	105533207	2042	53.531	58.4299	48.6321
chr16	67935028	67937435	2408	57.2511	47.6331	66.8691
chr13	44916967	44919163	2197	75.5981	73.0374	78.1587
chr7	148882705	148885096	2392	46.6291	46.3629	46.8952
chr1	44818918	44820800	1883	33.499	37.4714	29.5266
chr9	706489	709022	2534	36.3894	40.6469	32.1319
chr1	200668451	200670593	2143	92.973	89.5502	96.3957
chr5	77166957	77170048	3092	38.8911	31.7554	46.0268
chr21	8461130	8472093	10964	239.146	246.422	231.871
chr20	63519174	63521900	2727	129.978	124.481	135.475
chr10	46047576	46048943	1368	30.0059	30.4852	29.5266
chr14	104815209	104816914	1706	43.9395	44.4576	43.4215
chr10	73887205	73889340	2136	31.4576	27.3096	35.6056
chr11	75813990	75816501	2512	105.805	104.793	106.817
chr14	52729671	52731235	1565	85.3904	88.28	82.5009
chr6	26030961	26034514	3554	70.0506	65.4161	74.685
chr21	38138789	38141282	2494	68.8839	71.7672	66.0007
chr3	161338680	161340980	2301	45.1773	49.5384	40.8162
chr21	15208657	15211136	2480	69.0006	71.1321	66.8691
chr1	9823698	9826406	2709	74.9112	67.3215	82.5009
chr12	45989448	45992632	3185	84.6193	80.6587	88.5799
chr6	26213414	26218675	5262	120.438	114.955	125.922
chr12	120078076	120080708	2633	73.7121	76.213	71.2113
chr1	143252606	143256225	3620	88.7151	91.4556	85.9746
chr16	30813836	30815305	1470	43.3238	50.1735	36.4741
chr14	20342601	20344430	1830	112.59	117.495	107.685
chr10	102742501	102745525	3025	57.7241	61.6055	53.8427
chr1	171780406	171782727	2322	93.595	100.347	86.843
chr3	121748707	121750617	1911	59.2925	57.7948	60.7901
chr20	323487	327028	3542	71.5541	66.6863	76.4218
chr7	101161821	101164942	3122	53.4337	66.0512	40.8162
chr1	1072176	1075295	3120	231.953	214.667	249.239
chr20	19274116	19276868	2753	23.7909	24.1341	23.4476
chr9	71910437	71912327	1891	61.0163	67.3215	54.7111
chr19	35114204	35119153	4950	77.0692	76.8481	77.2903
chr12	49296392	49298627	2236	33.4148	35.5661	31.2635
chr8	122779777	122784461	4685	104.548	92.7258	116.37
chr20	47926241	47928733	2493	61.5996	64.1459	59.0532
chr1	117059089	117061129	2041	133.517	119.4	147.633
chr7	158523587	158525078	1492	31.2243	28.5799	33.8688
chr20	41135986	41139613	3628	129.933	136.548	123.317
chr20	53765762	53779104	13343	254.603	268.651	240.555
chr17	75403867	75406950	3084	96.8679	99.0769	94.6589
chr6	11231632	11233541	1910	60.2969	64.1459	56.448
chr19	16099938	16104759	4822	92.7009	76.8481	108.554
chr4	1579244	1581389	2146	152.978	134.008	171.949
chr19	12944699	12947028	2330	43.9913	48.9033	39.0794
chr1	36148564	36151611	3048	46.6809	50.8086	42.5531
chr11	65662238	65664301	2064	43.272	45.7278	40.8162
chr17	75978659	75980330	1672	69.5321	63.5108	75.5534
chr19	56119706	56122026	2321	77.4516	72.4023	82.5009
chr7	7639198	7641678	2481	78.0218	78.7534	77.2903
chr9	128067000	128070644	3645	164.799	168.939	160.66
chr14	49597437	49599763	2327	56.3372	59.7002	52.9742
chr5	75510531	75512354	1824	45.6764	44.4576	46.8952
chr3	64029664	64031627	1964	36.3894	40.6469	32.1319
chr7	2687149	2690529	3381	48.4501	48.2682	48.6321
chr20	20051578	20053281	1704	52.7923	48.2682	57.3164
chrX	48801289	48802775	1487	67.8277	60.9704	74.685
chr19	49362558	49364294	1737	90.0177	91.4556	88.5799
chr5	173312807	173317588	4782	103.465	100.982	105.948
chr16	87852736	87856134	3399	49.4546	54.6193	44.2899
chr17	83051156	83052520	1365	164.365	168.939	159.791
chr21	42008621	42011651	3031	86.6413	83.8343	89.4483
chr2	48313581	48316227	2647	73.0964	81.9289	64.2638
chr1	148262653	148264436	1784	50.0055	53.9842	46.0268
chr1	143192681	143194383	1703	37.9578	36.8363	39.0794
chr20	46814463	46815459	997	46.48	49.5384	43.4215
chr19	18291010	18294183	3174	64.0364	60.3353	67.7375
chr9	122939914	122941956	2043	89.1105	77.4832	100.738
chr6	54874269	54875610	1342	26.9664	30.4852	23.4476
chr16	29264757	29265986	1230	53.9134	53.9842	53.8427
chr22_KI270733v1_random	156999	160782	3784	89.4344	94.6311	84.2377
chr20	47491981	47495899	3919	112.823	116.225	109.422
chr22_KI270733v1_random	151636	153743	2108	67.6331	76.213	59.0532
chr14	69766516	69768392	1877	74.0621	74.3076	73.8166
chr2	121529902	121532303	2402	82.4545	97.1715	67.7375
chr14	75258411	75261029	2619	236.554	236.895	236.213
chr1	146368689	146371098	2410	55.3327	53.3491	57.3164
chr17	60166830	60168216	1387	31.6585	28.5799	34.7372
chr19	48636787	48638374	1588	90.4844	88.9151	92.0536
chr19	43532445	43535002	2558	98.7083	107.968	89.4483
chr1	17232925	17234683	1759	39.1114	40.0118	38.2109
chr20	54197104	54202204	5101	114.878	116.86	112.896
chr14	45133990	45134913	924	60.5951	57.7948	63.3954
chr1	181087030	181093488	6459	197.851	173.384	222.318
chr11	74169662	74172057	2396	90.0501	88.9151	91.1852
chr19	42421266	42422891	1626	36.1367	34.9309	37.3425
chr1	201480009	201481855	1847	87.9633	90.8205	85.1061
chr12	56078300	56081648	3349	64.9373	57.7948	72.0797
chr17	7250500	7253631	3132	99.3241	102.252	96.3957
chr3	43620840	43622762	1923	59.2082	55.8895	62.527
chr19	35247066	35249676	2611	71.1068	76.213	66.0007
chr9	128274110	128276852	2743	102.163	100.982	103.343
chr20	47976715	47980016	3302	73.7121	76.213	71.2113
chr15	74614150	74617147	2998	69.4673	68.5917	70.3428
chr16	22296228	22299257	3030	97.1012	97.8066	96.3957
chr8	28888809	28891693	2885	55.2354	60.9704	49.5005
chr19	50024084	50026525	2442	102.629	98.4417	106.817
chr10	16816948	16818270	1323	81.2622	80.0236	82.5009
chr9	137551088	137553302	2215	65.0927	71.1321	59.0532
chr12	50110197	50113725	3529	140.224	146.71	133.738
chr17	75204726	75206321	1596	51.023	50.8086	51.2374
chr1	149810533	149814238	3706	148.908	146.71	151.107
chr16	89719756	89723295	3540	103.478	91.4556	115.501
chr12	56103636	56105330	1695	111.735	107.968	115.501
chr9	33160752	33164575	3824	100.711	104.158	97.2642
chr15	52286461	52289088	2628	95.3125	93.3609	97.2642
chr20	62793493	62796934	3442	153.568	147.345	159.791
chr7	4744194	4746642	2449	76.4665	73.0374	79.8956
chr19	45467075	45471181	4107	115.999	122.576	109.422
chr10	102244960	102247298	2339	56.3178	52.714	59.9217
chr17	7833141	7837921	4781	171.228	167.033	175.423
chr6	63571307	63575360	4054	114.859	109.874	119.843
chr12	14769533	14771593	2061	46.6615	43.8225	49.5005
chr16	74997995	75001292	3298	46.2791	48.2682	44.2899
chr9	124770778	124772704	1927	47.4133	44.4576	50.3689
chr8	102653405	102657105	3701	362.955	352.485	373.425
chr20	47797429	47803077	5649	213.483	215.937	211.029
chr2	71067648	71069502	1855	46.4088	38.1065	54.7111
chr2	238288637	238290761	2125	66.1232	58.4299	73.8166
chr16	30074113	30077093	2981	51.5608	59.7002	43.4215
chr5	141923084	141924601	1518	63.7189	59.7002	67.7375
chr14	21307414	21309902	2489	60.5303	62.8757	58.1848
chr11	65539241	65542064	2824	85.0923	94.6311	75.5534
chr17	28334998	28337085	2088	60.1091	53.3491	66.8691
chr20	41391497	41394219	2723	34.6008	36.2012	33.0003
chr13	97432694	97434365	1672	67.0435	62.8757	71.2113
chr19	49765502	49767655	2154	136.251	151.791	120.712
chr19	49442461	49443974	1514	58.5407	57.1597	59.9217
chr3	136860527	136862978	2452	70.219	69.2268	71.2113
chr9	108472620	108474360	1741	33.2463	31.7554	34.7372
chr8	80083226	80085584	2359	104.379	88.9151	119.843
chr14	44961016	44963649	2634	75.948	71.1321	80.764
chr7	66653799	66655641	1843	61.2627	56.5246	66.0007
chr20	31592711	31594976	2266	104.483	97.8066	111.159
chr1	3899988	3901843	1856	52.2608	55.8895	48.6321
chr17	68289386	68293266	3881	140.341	146.075	134.607
chr7	87875268	87877376	2109	64.7882	60.9704	68.606
chr6	26249037	26252541	3505	58.0741	59.7002	56.448
chr3	155853197	155855664	2468	83.3036	90.1853	76.4218
chr16	2536724	2538309	1586	55.0994	54.6193	55.5795
chr15	97959768	97961763	1996	69.3506	69.2268	69.4744
chr14	20671477	20672900	1424	27.1803	22.2288	32.1319
chr1	114580137	114582540	2404	92.273	93.3609	91.1852
chr12	121626033	121628836	2804	58.1389	54.6193	61.6585
chr10	87341961	87343364	1404	71.6577	75.5779	67.7375
chr3	150545340	150548150	2811	80.3614	82.564	78.1587
chr18	3260865	3263591	2727	60.3618	59.065	61.6585
chr5	57171855	57175342	3488	70.0506	65.4161	74.685
chr2	55047862	55052245	4384	100.011	107.968	92.0536
chr1	201169903	201171655	1753	115.494	111.144	119.843
chr16	75249952	75252803	2852	49.6037	51.4438	47.7637
chr2	11497203	11499834	2632	57.6398	59.7002	55.5795
chr7	98251263	98253130	1868	54.1661	59.7002	48.6321
chr21	15199007	15201185	2179	71.7937	81.9289	61.6585
chr6	27836159	27840586	4428	66.7971	73.6725	59.9217
chr1	173867273	173869283	2011	140.257	144.17	136.344
chrX	49268524	49270212	1689	66.1751	62.8757	69.4744
chr17	79834660	79838907	4248	86.0904	84.4694	87.7114
chr20	58650545	58653484	2940	61.4829	64.781	58.1848
chr20	3794935	3798180	3246	83.4139	73.0374	93.7904
chr20	34875210	34877109	1900	76.6025	79.3885	73.8166
chr5	134224872	134228096	3225	88.1966	89.5502	86.843
chr11	59753771	59756424	2654	36.9209	33.0256	40.8162
chr2	218395324	218400846	5523	92.0397	94.6311	89.4483
chr16	71894001	71896341	2341	68.6831	70.497	66.8691
chrUn_KI270744v1	106127	113965	7839	99.7907	99.712	99.8695
chr10	28531697	28533412	1716	39.1762	34.9309	43.4215
chr5	146446654	146448495	1842	61.5996	64.1459	59.0532
chr20	48051085	48053575	2491	59.5258	56.5246	62.527
chr6	27813672	27815847	2176	53.4598	46.998	59.9217
chr1	183470706	183473406	2701	68.5988	68.5917	68.606
chr7	1542915	1549318	6404	80.8086	73.0374	88.5799
chr19	45442725	45444628	1904	83.2518	85.7396	80.764
chr10	132535797	132537940	2144	122.525	113.049	132.001
chr14	20454008	20456808	2801	83.4657	77.4832	89.4483
chr20	50677641	50678934	1294	40.5631	36.8363	44.2899
chr1	143231116	143233680	2565	63.6216	67.3215	59.9217
chr14	103561219	103563681	2463	51.6581	52.0789	51.2374
chr2	64750667	64752072	1406	109.816	113.684	105.948
chr1	150970914	150975142	4229	57.1732	62.2406	52.1058
chr11	64778223	64780244	2022	146.724	156.237	137.212
chr20	62922662	62927279	4618	68.3331	72.4023	64.2638
chr19	39405981	39407995	2015	79.7393	71.7672	87.7114
chr17	60369737	60373745	4009	41.9369	48.2682	35.6056
chr9	128025492	128028044	2553	57.4065	60.9704	53.8427
chr17	67716726	67719332	2607	90.6204	95.2662	85.9746
chr5	178211026	178215578	4553	55.7669	53.3491	58.1848
chr2	23924891	23928409	3519	52.4617	57.1597	47.7637
chr14	31206676	31208795	2120	53.1423	46.3629	59.9217
chr1	181021568	181023615	2048	58.2362	46.998	69.4744
chr19	14136018	14138100	2083	112.973	113.049	112.896
chr15	89333961	89336046	2086	71.7226	70.497	72.9481
chr9	100097688	100100424	2737	80.2447	83.1992	77.2903
chr10	99619643	99622201	2559	107.412	114.955	99.8695
chr16	87950237	87953133	2897	111.651	106.063	117.238
chr1	146034325	146040062	5738	160.256	167.669	152.844
chr12	131871659	131873173	1515	93.5757	93.3609	93.7904
chr1	20785928	20788235	2308	46.2984	55.2544	37.3425
chr1	149830636	149834076	3441	126.602	116.86	136.344
chr1	143202038	143202901	864	37.3421	42.5522	32.1319
chr1	28647685	28649642	1958	76.7516	76.213	77.2903
chr22_KI270733v1_random	154704	156277	1574	19.8829	24.1341	15.6317
chr11	67463053	67465766	2714	54.2634	52.0789	56.448
chr3	193870019	193871495	1477	21.3347	20.9586	21.7108
chr9	132353358	132355874	2517	88.4948	83.1992	93.7904
chr17	51165229	51167806	2578	67.7822	73.0374	62.527
chr16	3281977	3284585	2609	80.0763	79.3885	80.764
chr11	71451574	71454300	2727	64.9566	64.781	65.1323
chr12	56127236	56130143	2908	105.436	99.712	111.159
chr17	61253468	61256130	2663	38.0745	36.2012	39.9478
chr19	10332517	10335492	2976	78.4561	78.7534	78.1587
chr1	185156123	185158476	2354	71.8586	76.8481	66.8691
chr1	149859232	149862279	3048	119.317	109.239	129.396
chr9	134354383	134360231	5849	91.5861	87.6449	95.5273
chr9	92668209	92671908	3700	67.8277	60.9704	74.685
chr1	202925708	202927877	2170	67.5682	81.2938	53.8427
chr20	53687885	53693426	5542	129.427	125.116	133.738
chr3	132721352	132723466	2115	81.0613	78.7534	83.3693
chr20	31721309	31724378	3070	59.26	60.3353	58.1848
chr14	37589987	37593357	3371	70.8541	70.497	71.2113
chr1	114715779	114717570	1792	70.1866	71.7672	68.606
chr2	100290236	100293441	3206	87.6782	87.6449	87.7114
chr20	50740610	50752599	11990	553.898	539.842	567.953
chr2	11587705	11589791	2087	42.5851	40.0118	45.1584
chr8	144371983	144374760	2778	60.7118	57.1597	64.2638
chr5	91380011	91382226	2216	74.963	71.7672	78.1587
chr20	62426136	62428210	2075	53.881	56.5246	51.2374
chr20	3819669	3821598	1930	72.4743	71.1321	73.8166
chr7	6080284	6082163	1880	78.1061	80.6587	75.5534
chr1	146226055	146229841	3787	56.8881	59.065	54.7111
chr11	66266494	66270101	3608	81.4113	76.8481	85.9746
chr12	26937554	26939408	1855	53.1941	50.8086	55.5795
chr17	64773606	64775154	1549	83.5175	81.9289	85.1061
chr2	237500905	237503710	2806	78.2227	80.0236	76.4218
chr1	147242036	147244223	2188	59.0916	56.5246	61.6585
chr9	137084897	137087687	2791	119.239	123.846	114.633
chr16	10578415	10581137	2723	68.7285	58.4299	79.0271
chr20	19129342	19131014	1673	46.0264	42.5522	49.5005
chr9	137310077	137313423	3347	148.993	148.615	149.37
chr16	29381466	29383272	1807	43.8229	45.0927	42.5531
chr2	202374419	202378125	3707	95.6625	91.4556	99.8695
chr5	136053021	136055123	2103	36.7718	36.2012	37.3425
chr9	137253806	137256201	2396	29.2866	27.3096	31.2635
chr2	237481693	237484688	2996	71.541	76.213	66.8691
chr9	91795623	91798739	3117	38.4245	34.2958	42.5531
chr12	124378692	124382511	3820	46.6939	41.282	52.1058
chr12	56645057	56646686	1630	57.6592	66.6863	48.6321
chr9	120841930	120843872	1943	76.3174	76.213	76.4218
chr19	15377595	15380713	3119	74.7296	73.0374	76.4218
chr19	46859754	46861141	1388	88.7281	81.9289	95.5273
chr20	54782258	54783670	1413	34.4517	39.3767	29.5266
chr14	20679907	20685594	5688	141.365	159.412	123.317
chr5	33439103	33442162	3060	50.9063	51.4438	50.3689
chr2	27355805	27357609	1805	64.3864	58.4299	70.3428
chr20	54062114	54064376	2263	45.5273	47.6331	43.4215
chr9	127714948	127716735	1788	50.8415	56.5246	45.1584
chr1	144411748	144414784	3037	132.434	127.657	137.212
chr13	26221155	26223001	1847	42.9351	38.1065	47.7637
chr1	143261847	143263201	1355	36.0719	40.0118	32.1319
chr6	4489063	4490933	1871	33.4796	30.4852	36.4741
chr12	49740377	49742751	2375	129.46	122.576	136.344
chr15	84979601	84983073	3473	85.3062	86.3747	84.2377
chr7	138459603	138461508	1906	90.588	97.8066	83.3693
chr17	61448094	61452107	4014	153.568	147.345	159.791
chr19	17225531	17227110	1580	38.9105	38.7416	39.0794
chr19	11373587	11375923	2337	81.8973	81.2938	82.5009
chr11	58577739	58580354	2616	62.0987	59.065	65.1323
chr2	26344553	26348117	3565	78.7736	79.3885	78.1587
chr1	155000662	155002596	1935	92.0203	87.6449	96.3957
chr22	21467262	21469380	2119	79.9078	75.5779	84.2377
chr7	1457627	1460064	2438	158.759	140.359	177.16
chr16	87387854	87389011	1158	49.487	52.0789	46.8952
chr1	174998572	175000952	2381	113.426	120.035	106.817
chr12	79546100	79548622	2523	68.8646	64.781	72.9481
chr11	64284165	64287204	3040	56.1881	62.8757	49.5005
chr22	18527593	18530061	2469	109.311	102.252	116.37
chr17	18260039	18262179	2141	42.8054	48.2682	37.3425
chr9	108477323	108479775	2453	45.3588	43.8225	46.8952
chr16	28823101	28825169	2069	73.427	73.0374	73.8166
chr13	27448790	27451760	2971	55.0346	59.7002	50.3689
chr11	506063	507631	1569	45.2746	41.9171	48.6321
chr4	15001046	15003862	2817	56.9854	51.4438	62.527
chr11	123060939	123063461	2523	68.3461	62.8757	73.8166
chr20	50956855	50960449	3595	51.3406	51.4438	51.2374
chr9	126721580	126723284	1705	44.6589	47.6331	41.6846
chr1	44673436	44675316	1881	75.9999	75.5779	76.4218
chr10	104120628	104122583	1956	63.0707	67.9566	58.1848
chr21	42375149	42378274	3126	88.2939	81.9289	94.6589
chr1	155687344	155689926	2583	53.0774	51.4438	54.7111
chr19	46372640	46375097	2458	85.9931	92.0907	79.8956
chr8	143368165	143370805	2641	63.1549	69.8619	56.448
chr9	127244608	127246138	1531	55.3845	57.7948	52.9742
chr20	50688948	50691902	2955	46.1948	46.3629	46.0268
chr13	44576514	44578376	1863	63.9846	55.8895	72.0797
chr1	151987943	151991654	3712	80.342	75.5779	85.1061
chr15	98895819	98897979	2161	69.4479	61.6055	77.2903
chr2	237589854	237592126	2273	73.3946	75.5779	71.2113
chr17	4832322	4834087	1766	47.2317	50.1735	44.2899
chr7	112449222	112451600	2379	126.206	130.832	121.58
chr14	75660486	75661836	1351	118.319	119.4	117.238
chr8	103414167	103416765	2599	123.4	129.562	117.238
chr11	13667540	13669770	2231	75.2287	67.9566	82.5009
chr20	62236933	62238653	1721	134.307	134.008	134.607
chr20	48811437	48813533	2097	18.0943	19.6883	16.5002
chr21	8107189	8108424	1236	38.8132	46.3629	31.2635
chr16	4957402	4958737	1336	87.5809	95.2662	79.8956
chr1	181116592	181120495	3904	184.475	175.29	193.66
chr17	48022922	48027068	4147	96.5827	95.9013	97.2642
chr1	150566282	150570034	3753	127.574	125.751	129.396
chr20	51160100	51161946	1847	33.3305	33.6607	33.0003
chr17	17970432	17973513	3082	92.8433	99.712	85.9746
chr8	8227318	8229374	2057	98.8187	90.8205	106.817
chr1	52365165	52367117	1953	67.2119	66.6863	67.7375
chr16	2161678	2164026	2349	44.2571	45.0927	43.4215
chr16	67804745	67807738	2994	88.0475	92.7258	83.3693
chr2	195656236	195658803	2568	87.0106	88.9151	85.1061
chr17	4947277	4950689	3413	67.9637	67.3215	68.606
chr6	27131135	27135009	3875	121.747	131.467	112.027
chr17	69325845	69328099	2255	115.494	111.144	119.843
chr9	124860981	124862804	1824	70.8217	73.0374	68.606
chr16	2751424	2754736	3313	70.7699	68.5917	72.9481
chr3	23944965	23946932	1968	81.5149	85.7396	77.2903
chr1	30717854	30720145	2292	129.259	121.306	137.212
chr16	1825304	1828567	3264	56.3372	59.7002	52.9742
chr5	131796327	131797852	1526	55.7021	58.4299	52.9742
chr18	3622850	3625386	2537	55.0994	54.6193	55.5795
chr8	22693396	22696488	3093	75.8314	71.7672	79.8956
chr16	85491435	85493330	1896	44.4386	39.3767	49.5005
chr7	29562474	29565298	2825	53.9977	55.8895	52.1058
chr22	28791726	28794527	2802	74.963	71.7672	78.1587
chr7	103073441	103076567	3127	117.574	135.278	99.8695
chr12	119988223	119989705	1483	86.1616	95.9013	76.4218
chr9	112716753	112718864	2112	61.0487	64.781	57.3164
chr1	144545777	144547427	1651	52.4941	54.6193	50.3689
chr14	63542041	63544034	1994	50.5046	48.9033	52.1058
chr14	67358736	67361403	2668	71.2622	89.5502	52.9742
chr17	28749596	28752794	3199	40.8807	37.4714	44.2899
chr2	159285373	159287614	2242	67.9119	62.8757	72.9481
chr1	54051965	54054299	2335	55.8967	43.1873	68.606
chr16	89699530	89702997	3468	214.28	204.505	224.055
chr5	90408677	90410799	2123	59.6294	65.4161	53.8427
chr17	28742664	28748030	5367	184.948	189.262	180.633
chr12	52068546	52071214	2669	57.6074	62.2406	52.9742
chr2	3221134	3223826	2693	54.717	59.065	50.3689
chr6	12323503	12325446	1944	80.2123	85.7396	74.685
chr17	3635299	3637140	1842	62.0987	59.065	65.1323
chrX	47231882	47233858	1977	55.916	50.1735	61.6585
chr5	177300437	177302961	2525	40.8158	42.5522	39.0794
chr11	76443858	76446321	2464	103.582	100.347	106.817
chr3	14401821	14404095	2275	64.7039	59.065	70.3428
chr1	228623309	228627369	4061	53.881	56.5246	51.2374
chr5	16893961	16895449	1489	41.2824	40.0118	42.5531
chr11	72793268	72794324	1057	29.5393	33.0256	26.0529
chr1	155062575	155065457	2883	43.3369	40.6469	46.0268
chr5	151252180	151253707	1528	75.0472	73.6725	76.4218
chr21	46634217	46636750	2534	93.2257	95.2662	91.1852
chr12	50167025	50168033	1009	70.6145	55.2544	85.9746
chr1	114508775	114513292	4518	198.363	201.329	195.397
chr1	150362477	150366468	3992	155.039	151.156	158.923
chr2	20112995	20115664	2670	84.9887	85.7396	84.2377
chr19	10834936	10836663	1728	121.009	121.306	120.712
chr17	8185354	8188332	2979	73.6279	74.3076	72.9481
chr2	101410223	101411471	1249	49.6879	53.3491	46.0268
chr14	65411258	65413808	2551	72.2541	62.8757	81.6324
chr1	151908229	151910621	2393	65.4427	69.2268	61.6585
chr4	17576696	17578462	1767	47.6984	47.6331	47.7637
chr1	156337521	156339428	1908	89.8168	90.1853	89.4483
chr2	134917185	134919595	2411	66.9786	67.9566	66.0007
chr15	91430139	91432606	2468	46.7457	45.7278	47.7637
chr17	40098993	40101793	2801	62.2802	53.3491	71.2113
chr5	72955129	72957562	2434	50.1352	43.8225	56.448
chr21	38909786	38911220	1435	43.5377	41.9171	45.1584
chr17	8188876	8190777	1902	43.1035	41.9171	44.2899
chr6	52994895	52996182	1288	51.7748	51.4438	52.1058
chr16	29815591	29817561	1971	74.0621	74.3076	73.8166
chr5	143594626	143596880	2255	51.5415	52.714	50.3689
chr5	134737325	134739718	2394	47.6853	57.1597	38.2109
chr17	7572041	7574572	2532	84.3472	67.9566	100.738
chr6	26054135	26057155	3021	64.0688	57.7948	70.3428
chr19	49127639	49128756	1118	49.0204	54.6193	43.4215
chr7	6103799	6105045	1247	72.7077	69.8619	75.5534
chr20	63088201	63090185	1985	54.0107	46.3629	61.6585
chr9	128126832	128128799	1968	45.7282	48.9033	42.5531
chr12	122526542	122528128	1587	52.8441	52.714	52.9742
chr21	41677810	41683014	5205	140.056	142.899	137.212
chr16	78099244	78100801	1558	58.8583	57.7948	59.9217
chr17	61405875	61408781	2907	84.2238	94.6311	73.8166
chr17	28723894	28730613	6720	181.384	170.844	191.923
chr20	53914127	53918321	4195	118.397	104.793	132.001
chr9	128683074	128685466	2393	37.7569	35.5661	39.9478
chr3	50298795	50300431	1637	91.3528	88.9151	93.7904
chr14	37593970	37596720	2751	271.401	262.3	280.503
chr22	49959732	49961567	1836	55.903	59.7002	52.1058
chr12	120233775	120236262	2488	51.7423	53.9842	49.5005
chr6	109093979	109096392	2414	73.7445	73.6725	73.8166
chr7	26182573	26186125	3553	35.7349	32.3905	39.0794
chr20	47641454	47645102	3649	48.2168	49.5384	46.8952
chr14	65226358	65228152	1795	62.4162	59.7002	65.1323
chr1	148333564	148335823	2260	57.1863	52.714	61.6585
chr16	67183154	67184830	1677	69.0524	75.5779	62.527
chr18	9473962	9476128	2167	77.6525	73.6725	81.6324
chr14	39174272	39176110	1839	59.6425	55.8895	63.3954
chr20	63979599	63982045	2447	45.3913	41.282	49.5005
chr11	67352824	67354388	1565	94.8589	86.3747	103.343
chr20	56787258	56789457	2200	43.7386	43.1873	44.2899
chr1	121183975	121185317	1343	144.1	149.25	138.949
chr3	15600252	15602791	2540	109.045	106.063	112.027
chr17	41785548	41787582	2035	117.114	111.779	122.449
chr8	127809097	127812094	2998	53.4468	56.5246	50.3689
chr19	47514609	47516064	1456	101.21	99.0769	103.343
chr11	61487970	61490589	2620	67.7628	66.0512	69.4744
chr17	62964416	62967892	3477	114.009	116.86	111.159
chr11	86243814	86245900	2087	56.3696	57.1597	55.5795
chr13	45417368	45419104	1737	60.7311	64.1459	57.3164
chr11	61965535	61969030	3496	51.6581	52.0789	51.2374
chr17	51258876	51262409	3534	114.664	125.116	104.212
chr4	82899776	82901641	1866	70.7375	71.1321	70.3428
chr20	31718700	31720489	1790	40.3622	35.5661	45.1584
chr8	629074	631541	2468	37.4394	34.9309	39.9478
chr2	725791	727514	1724	13.6679	17.783	9.55273
chr9	126914114	126915869	1756	63.2198	64.781	61.6585
chr20	25622942	25625178	2237	78.5079	83.1992	73.8166
chr19	41363623	41364879	1257	49.5388	56.5246	42.5531
chr3	105365450	105370243	4794	72.4419	73.6725	71.2113
chr2	37083619	37084916	1298	41.6194	47.6331	35.6056
chr16	85745308	85747448	2141	44.944	50.8086	39.0794
chr9	113400650	113402043	1394	59.6618	62.8757	56.448
chr20	57690703	57699474	8772	254.227	247.057	261.397
chr9	99818697	99823050	4354	185.013	184.181	185.844
chr1	149938723	149940262	1540	54.9309	50.8086	59.0532
chr20	59030990	59033368	2379	127.839	121.941	133.738
chr7	101216200	101218824	2625	42.9544	45.0927	40.8162
chr6	26222784	26224722	1939	32.2612	32.3905	32.1319
chr2	61853247	61855663	2417	46.7133	48.2682	45.1584
chr17	68511088	68514242	3155	116.433	122.576	110.291
chr7	1554842	1557000	2159	121.177	125.116	117.238
chr7	7181726	7183384	1659	65.8575	62.2406	69.4744
chr6	27176517	27178831	2315	37.1088	43.8225	30.3951
chr11	66956535	66959672	3138	120.225	123.211	117.238
chr19	18202659	18205368	2710	92.9212	85.1045	100.738
chr20	51734356	51737647	3292	49.6361	48.9033	50.3689
chr19	10567972	10569681	1710	60.6469	62.2406	59.0532
chr1	248873019	248874673	1655	46.13	51.4438	40.8162
chr7	158536544	158537977	1434	32.0085	26.6745	37.3425
chr21	8412998	8415606	2609	57.9056	55.8895	59.9217
chr1	159780471	159781579	1109	51.3018	37.4714	65.1323
chr3	105868067	105870426	2360	61.0293	57.7948	64.2638
chr17	61508215	61513445	5231	44.9764	48.2682	41.6846
chr9	121267123	121269734	2612	48.8519	50.8086	46.8952
chr8	124450059	124451991	1933	48.1002	50.1735	46.0268
chr20	50789426	50791754	2329	210.307	209.586	211.029
chr16	20900197	20902249	2053	117.114	111.779	122.449
chr9	41188087	41190025	1939	60.8284	56.5246	65.1323
chr20	63740167	63742181	2015	64.1531	59.7002	68.606
chr13	110714126	110716702	2577	84.4508	76.8481	92.0536
chr20	47431348	47439851	8504	338.464	374.714	302.214
chr16	72848608	72849584	977	36.1885	39.3767	33.0003
chr12	56687075	56690445	3371	83.1676	83.8343	82.5009
chr14	102316376	102318838	2463	41.8009	41.9171	41.6846
chr14	61523985	61527635	3651	94.3081	87.0098	101.606
chr16	89192070	89193766	1697	80.7956	82.564	79.0271
chr9	128688089	128689729	1641	70.4717	74.9427	66.0007
chr1	155082590	155086840	4251	121.624	115.59	127.659
chr9	98056029	98057718	1690	72.0725	68.5917	75.5534
chr11	64304047	64306790	2744	92.2275	105.428	79.0271
chr20	47722147	47726954	4808	88.3975	90.8205	85.9746
chr9	129173201	129177203	4003	74.8787	69.8619	79.8956
chr1	45490383	45491933	1551	53.181	60.3353	46.0268
chr16	4845997	4849076	3080	72.5586	73.0374	72.0797
chr8	89900521	89902780	2260	113.141	116.86	109.422
chr2	175167399	175169109	1711	100.776	99.0769	102.475
chr11	60913248	60915619	2372	40.0771	32.3905	47.7637
chr7	75738299	75739938	1640	71.1329	57.1597	85.1061
chr17	57897816	57903919	6104	95.9801	92.0907	99.8695
chr16	87789280	87791464	2185	16.2214	13.3373	19.1055
chr22	35298898	35300924	2027	34.0499	36.8363	31.2635
chr17	60134193	60144149	9957	230.585	219.747	241.424
chr19	40424632	40426701	2070	85.3386	83.8343	86.843
chr4	138909744	138913665	3922	99.6416	102.888	96.3957
chr20	48011889	48014097	2209	67.7498	75.5779	59.9217
chr2	241313615	241317411	3797	99.3565	99.712	99.001
chr7	75091861	75094116	2256	59.4285	64.1459	54.7111
chr2	148644059	148646496	2438	71.2365	66.0512	76.4218
chr12	49069466	49070386	921	44.2053	40.6469	47.7637
chr16	85749367	85754143	4777	96.8485	92.0907	101.606
chr20	53824102	53830809	6708	113.556	109.874	117.238
chr6	26203531	26206722	3192	64.84	65.4161	64.2638
chr2	197452428	197454290	1863	104.923	114.319	95.5273
chr17	4965979	4968283	2305	117.632	113.684	121.58
chr2_KI270770v1_alt	10867	16430	5564	171.28	171.479	171.081
chr19	12736458	12738495	2038	62.8049	71.7672	53.8427
chr6	136287465	136291012	3548	99.2398	100.347	98.1326
chr11	65496409	65499702	3294	95.4292	92.7258	98.1326
chr16	89832617	89834833	2217	92.4545	87.6449	97.2642
chr8	66711104	66715317	4214	100.925	95.9013	105.948
chr16	4623362	4626021	2660	56.5705	58.4299	54.7111
chr9	97982221	97985460	3240	72.6234	67.9566	77.2903
chr11	694887	696698	1812	91.8712	90.8205	92.922
chr20	54455447	54457654	2208	41.8333	39.3767	44.2899
chr17	67376349	67380015	3667	89.9853	93.996	85.9746
chr13	98483185	98485768	2584	81.8649	83.8343	79.8956
chr21	43516321	43519020	2700	42.1509	40.0118	44.2899
chr5	56908306	56910974	2669	104.003	109.874	98.1326
chr19	1081213	1083478	2266	80.5623	83.8343	77.2903
chr1	150268000	150269631	1632	47.0633	46.3629	47.7637
chr4	169619252	169621290	2039	62.2153	58.4299	66.0007
chr2	11154535	11156427	1893	73.8806	80.0236	67.7375
chr14	95532949	95536517	3569	104.651	101.617	107.685
chr3	133572805	133574172	1368	116.848	115.59	118.106
chr6	110873753	110877030	3278	60.7636	61.6055	59.9217
chr20	53937236	53941921	4686	123.361	115.59	131.133
chr7	1454628	1456388	1761	75.462	66.6863	84.2377
chr12	49366369	49367962	1594	56.8363	54.6193	59.0532
chr9	35656865	35659234	2370	54.8337	58.4299	51.2374
chr19	12788433	12790979	2547	87.5615	88.28	86.843
chr8	127851094	127853333	2240	43.4535	40.0118	46.8952
chr16	3155995	3159431	3437	91.7221	93.996	89.4483
chr14	24441480	24443372	1893	92.4027	83.1992	101.606
chr4	40055714	40058660	2947	67.711	61.6055	73.8166
chr20	45339997	45345285	5289	109.143	98.4417	119.843
chr6	42928605	42930794	2190	49.0528	52.0789	46.0268
chr20	59933236	59934632	1397	55.08	47.6331	62.527
chr11	118915010	118925199	10190	302.127	295.96	308.293
chr17	60352027	60359798	7772	131.987	137.183	126.791
chr17	59618081	59621476	3396	154.592	160.682	148.502
chr16	13919401	13920627	1227	54.6328	57.1597	52.1058
chr12	103928988	103931790	2803	66.4602	66.0512	66.8691
chr20	48484729	48487004	2276	51.2563	49.5384	52.9742
chr16	2147582	2150731	3150	50.8739	53.9842	47.7637
chr2	128026191	128029043	2853	108.093	104.158	112.027
chr2	63587693	63589543	1851	60.9451	55.8895	66.0007
chr6	136249002	136251932	2931	59.0073	54.6193	63.3954
chr14	49766713	49769825	3113	49.2213	55.8895	42.5531
chr17	63444546	63448610	4065	138.021	149.25	126.791
chr6	15088884	15091299	2416	50.3037	47.6331	52.9742
chr19	18258991	18264561	5571	51.1721	47.6331	54.7111
chr19	45090873	45093888	3016	45.5079	40.6469	50.3689
chr1	150066802	150068524	1723	54.3476	53.9842	54.7111
chr12	56314944	56316843	1900	75.099	78.1183	72.0797
chr7	102687934	102689457	1524	102.61	91.4556	113.764
chr17	7213418	7215744	2327	71.1717	71.1321	71.2113
chr10	72330648	72332731	2084	125.053	127.657	122.449
chr2	70140519	70144109	3591	145.35	144.805	145.896
chr12	122498885	122501801	2917	53.395	52.0789	54.7111
chr11	18393862	18396618	2757	63.4855	60.9704	66.0007
chr16	77190141	77191811	1671	91.1843	85.1045	97.2642
chr7	33061747	33063783	2037	90.9573	102.888	79.0271
chr9	70410638	70414827	4190	69.2015	72.4023	66.0007
chr19	48468609	48470265	1657	130.334	139.089	121.58
chr11	65261145	65263267	2123	38.2429	40.0118	36.4741
chr9	114551588	114552815	1228	56.0521	56.5246	55.5795
chr19	45667353	45669880	2528	45.8967	52.714	39.0794
chr20	18506696	18508863	2168	78.806	76.8481	80.764
chr16	85552947	85560075	7129	107.807	100.982	114.633
chr14	95055814	95057203	1390	43.8422	52.0789	35.6056
chr17	47648937	47650565	1629	149.602	126.387	172.818
chr1	15798893	15801090	2198	42.7211	46.3629	39.0794
chr9	94817739	94819878	2140	35.3849	34.2958	36.4741
chr16	29789123	29792820	3698	58.5083	59.7002	57.3164
chr11	207145	209160	2016	47.2642	47.6331	46.8952
chr12	116389733	116391692	1960	45.9291	50.1735	41.6846
chr16	34592401	34593699	1299	19.5136	19.0532	19.9739
chr12	82685545	82688785	3241	82.85	83.1992	82.5009
chr8	51898433	51900095	1663	56.1687	55.8895	56.448
chr20	47794213	47796278	2066	62.0338	64.1459	59.9217
chr15	50423959	50425870	1912	67.9507	76.8481	59.0532
chr6	26025417	26028088	2672	46.7133	48.2682	45.1584
chr11	67316849	67318762	1914	44.1535	36.2012	52.1058
chr7	138889694	138892072	2379	43.1878	43.8225	42.5531
chr8	101491315	101495460	4146	163.529	166.398	160.66
chr3	47380077	47382049	1973	49.4546	54.6193	44.2899
chr4	48015835	48017786	1952	39.1956	41.9171	36.4741
chr2	218567159	218569781	2623	86.4598	89.5502	83.3693
chr16	85421032	85423980	2949	40.2131	38.7416	41.6846
chr12	93568896	93572568	3673	51.023	50.8086	51.2374
chr5	178203616	178205769	2154	60.6469	62.2406	59.0532
chr20	50734622	50738628	4007	82.7333	83.8343	81.6324
chr9	127801626	127804846	3221	53.6283	50.8086	56.448
chr2	27211044	27213526	2483	58.4565	55.2544	61.6585
chr2	207710434	207713104	2671	87.5939	85.7396	89.4483
chr5	179793888	179797192	3305	58.6574	56.5246	60.7901
chr12	132908043	132909534	1492	55.5012	57.1597	53.8427
chr1	201460161	201464395	4235	71.4699	64.781	78.1587
chr21	42878145	42880122	1978	54.6652	54.6193	54.7111
chr7	100889009	100891003	1995	78.5079	83.1992	73.8166
chr20	17567922	17571464	3543	121.009	121.306	120.712
chr7	151056026	151061421	5396	119.79	123.211	116.37
chr12	31072870	31075748	2879	48.6835	46.998	50.3689
chr22	40651385	40652739	1355	34.9183	36.8363	33.0003
chr1	156113949	156116954	3006	63.2328	55.2544	71.2113
chr7	537842	540658	2817	65.9611	71.1321	60.7901
chr1	202860418	202863136	2719	83.4203	89.5502	77.2903
chr19	50657158	50659561	2404	110.815	103.523	118.106
chr14	73784226	73787912	3687	84.1851	80.6587	87.7114
chr2	61537937	61539409	1473	68.7479	65.4161	72.0797
chr8	126570327	126572567	2241	42.6693	41.9171	43.4215
chr20	25496690	25497992	1303	57.3353	49.5384	65.1323
chr18	105742	113087	7346	242.776	259.759	225.792
chr1	153944646	153947659	3014	43.1684	36.8363	49.5005
chr8	66521212	66524543	3332	90.465	81.9289	99.001
chr7	74889722	74891195	1474	73.2585	69.2268	77.2903
chr6	2763798	2766452	2655	63.6022	60.3353	66.8691
chr19	38387011	38388741	1731	60.7636	61.6055	59.9217
chr1	145917795	145920377	2583	65.5917	66.0512	65.1323
chr9	35115573	35117338	1766	60.5951	57.7948	63.3954
chr20	47471493	47474694	3202	27.4006	30.4852	24.316
chr19	12550261	12552413	2153	61.0811	62.2406	59.9217
chr6	26121931	26125224	3294	80.6596	76.213	85.1061
chr20	49218659	49220275	1617	50.5239	55.8895	45.1584
chr19	39390030	39392362	2333	79.4736	75.5779	83.3693
chr7	233780	236620	2841	50.7248	57.1597	44.2899
chr17	7241347	7243587	2241	45.0089	45.7278	44.2899
chr16	22205366	22207782	2417	44.6589	47.6331	41.6846
chr9	135907423	135908795	1373	92.2924	100.347	84.2377
chr19	24053853	24055194	1342	20.9004	20.9586	20.8423
chr16	2266796	2270275	3480	65.19	63.5108	66.8691
chr1	150515062	150517046	1985	65.4427	69.2268	61.6585
chr2	26032022	26035183	3162	130.451	138.454	122.449
chr10	119079295	119081985	2691	53.4598	46.998	59.9217
chr1	169484379	169486656	2278	72.9928	73.0374	72.9481
chr4	112230764	112232934	2171	64.4188	55.8895	72.9481
chr1	108197518	108201478	3961	135.357	128.292	142.423
chr14	23693907	23696535	2629	31.9112	34.2958	29.5266
chr2	66389147	66392100	2954	46.4282	45.0927	47.7637
chr10	133277748	133279845	2098	84.7553	87.0098	82.5009
chr2	237485914	237491035	5122	121.404	107.333	135.475
chr14	61694487	61696609	2123	84.2499	75.5779	92.922
chr14	68818875	68820581	1707	63.2067	74.3076	52.1058
chr7	152462971	152465388	2418	154.022	154.331	153.712
chr16	30198734	30201486	2753	71.755	67.9566	75.5534
chr1	202105169	202109117	3949	146.536	145.44	147.633
chr19	38297115	38300039	2925	55.3003	55.8895	54.7111
chr12	54324325	54325786	1462	55.7863	60.3353	51.2374
chr8	144290445	144293087	2643	82.9342	85.1045	80.764
chr7	108525403	108526874	1472	137.917	140.359	135.475
chr20	57772066	57773416	1351	74.7814	77.4832	72.0797
chr11	14890795	14892661	1867	53.894	46.998	60.7901
chr16	75110514	75112710	2197	38.0745	36.2012	39.9478
chr2	63840357	63842641	2285	49.0335	45.0927	52.9742
chr21	8452452	8455672	3221	51.9432	55.2544	48.6321
chrX	154396909	154399837	2929	73.5437	72.4023	74.685
chr1	173475859	173478864	3006	71.4699	64.781	78.1587
chr14	49891807	49893930	2124	55.3327	53.3491	57.3164
chr12	71662293	71665246	2954	64.4058	65.4161	63.3954
chr20	47737782	47744413	6632	88.7669	95.9013	81.6324
chr12	56220507	56222925	2419	123.614	121.306	125.922
chr16	18799938	18802445	2508	127.703	115.59	139.817
chr15	84600132	84601698	1567	55.3652	50.8086	59.9217
chr2	99335535	99337936	2402	65.8251	64.781	66.8691
chr14	49632484	49635851	3368	65.6048	56.5246	74.685
chr5	179559056	179560445	1390	60.1933	55.2544	65.1323
chr5	74639203	74642261	3059	45.5079	40.6469	50.3689
chr21	37563061	37566409	3349	73.3621	78.1183	68.606
chr1	202045482	202048386	2905	111.002	114.319	107.685
chr2	207528914	207530423	1510	85.2544	81.9289	88.5799
chr3	10115147	10116544	1398	44.8922	46.3629	43.4215
chr17	47970340	47971759	1420	89.7456	78.7534	100.738
chr12	121838889	121840537	1649	65.6954	74.9427	56.448
chr1	154972220	154976869	4650	157.93	154.331	161.528
chr22	28816842	28820309	3468	91.437	90.8205	92.0536
chr11	66438003	66439574	1572	31.6261	31.1203	32.1319
chr13	52454868	52456186	1319	42.7017	39.3767	46.0268
chr2	235542023	235545311	3289	31.6779	35.5661	27.7898
chr2	27049810	27052730	2921	81.4956	78.7534	84.2377
chr9	131372200	131374740	2541	87.4773	86.3747	88.5799
chr11	62770776	62772491	1716	54.4319	55.8895	52.9742
chr7	102363104	102365162	2059	57.7241	61.6055	53.8427
chr1	143265329	143267639	2311	12.5468	12.0671	13.0265
chr7	73768713	73771286	2574	89.4475	85.1045	93.7904
chr17	47956248	47958735	2488	47.9186	55.8895	39.9478
chr16	30893199	30895749	2551	47.5493	50.8086	44.2899
chr14	59187847	59190973	3127	105.384	95.2662	115.501
chr5	109688078	109691795	3718	62.3189	67.3215	57.3164
chr9	128770559	128773119	2561	36.8561	38.1065	35.6056
chr1	117120165	117123011	2847	122.383	132.738	112.027
chr9	128298201	128299636	1436	36.9403	40.0118	33.8688
chr1	207320740	207322467	1728	134.56	139.724	129.396
chr12	12871615	12873712	2098	67.1277	64.781	69.4744
chr11	61698977	61701311	2335	45.0413	43.1873	46.8952
chr1	109089133	109092057	2925	49.6037	51.4438	47.7637
chr1	153921314	153924712	3399	110.348	106.063	114.633
chr17	58082877	58085629	2753	57.1214	57.7948	56.448
chr5	172769946	172773009	3064	103.167	107.333	99.001
chr10	29104416	29106966	2551	28.8199	29.8501	27.7898
chr16	46398193	46401669	3477	119.959	127.022	112.896
chr17	62670559	62673090	2532	68.6637	63.5108	73.8166
chr8	86507806	86509459	1654	90.9834	83.8343	98.1326
chr8	101125062	101127790	2729	59.5776	60.9704	58.1848
chr16	2672554	2674179	1626	59.6294	65.4161	53.8427
chr2	42360496	42362466	1971	70.3357	68.5917	72.0797
chr3	134357264	134360079	2816	47.6466	43.1873	52.1058
chr8	142675524	142678633	3110	41.9824	36.2012	47.7637
chr11	66637273	66640370	3098	94.0941	95.2662	92.922
chr9	87725075	87727377	2303	59.8433	57.1597	62.527
chr16	69310616	69312240	1625	65.1057	61.6055	68.606
chr11	67053429	67057955	4527	94.9432	88.28	101.606
chr9	127770703	127772167	1465	86.3237	83.1992	89.4483
chr5	140663623	140665698	2076	44.5553	38.7416	50.3689
chr17	74872308	74873906	1599	72.3252	74.3076	70.3428
chr8	143951357	143954491	3135	105.52	101.617	109.422
chr17_GL383566v1_alt	76554	80128	3575	165.059	148.615	181.502
chr19	49676189	49678912	2724	141.345	152.426	130.265
chr21	6123010	6126595	3586	63.5698	62.8757	64.2638
chr2	28436263	28438236	1974	29.5005	19.0532	39.9478
chr9	94165574	94167459	1886	140.859	147.98	133.738
chr7	866719	868498	1780	118.637	120.035	117.238
chr8	102805391	102809559	4169	264.454	262.3	266.608
chr7	149027499	149029813	2315	107.127	111.779	102.475
chr14	35120812	35123714	2903	98.6759	110.509	86.843
chr16	46394169	46395712	1544	44.7431	49.5384	39.9478
chr19	7828988	7830317	1330	52.831	62.2406	43.4215
chr9	133029740	133031773	2034	63.9004	53.9842	73.8166
chr7	108568585	108571183	2599	82.364	78.7534	85.9746
chr14	69998897	70000080	1184	28.7033	30.4852	26.9213
chr16	85523197	85526323	3127	36.3376	36.2012	36.4741
chr7	157287970	157290729	2760	90.3808	80.0236	100.738
chr19	1103492	1104980	1489	68.9164	69.2268	68.606
chr2	178449982	178452033	2052	60.0118	60.9704	59.0532
chr2	47174585	47177436	2852	58.8907	55.2544	62.527
chr3	186569791	186571133	1343	65.3909	64.781	66.0007
chr2	88690327	88692614	2288	67.0759	60.3353	73.8166
chr8	144412692	144413958	1267	57.089	60.3353	53.8427
chr15	50685171	50687522	2352	66.3759	64.1459	68.606
chr20	57209614	57218513	8900	87.9827	97.8066	78.1587
chr3	149657195	149659470	2276	77.6201	76.213	79.0271
chr2	170927897	170931026	3130	82.3185	90.8205	73.8166
chr8	133296325	133298427	2103	81.9298	78.7534	85.1061
chr16	72008304	72009398	1095	71.8068	72.4023	71.2113
chr12	123971397	123973616	2220	61.1978	61.6055	60.7901
chr1	193058083	193060696	2614	65.5269	71.1321	59.9217
chr19	38263729	38266508	2780	98.1381	101.617	94.6589
chr1	179080902	179083422	2521	61.7811	58.4299	65.1323
chr16	87382637	87385274	2638	83.2	81.2938	85.1061
chr1	179591176	179592762	1587	56.3372	59.7002	52.9742
chr3	12989401	12991289	1889	38.5605	40.6469	36.4741
chr12	88141293	88143147	1855	55.3521	60.3353	50.3689
chr3	129485018	129487453	2436	54.2958	49.5384	59.0532
chr10	100373081	100374618	1538	57.1732	62.2406	52.1058
chr1	116371521	116377303	5783	147.489	147.345	147.633
chr3	9749013	9750967	1955	87.7106	85.1045	90.3167
chr20	63706889	63709445	2557	39.0789	42.5522	35.6056
chr17	62702417	62705183	2767	78.6569	80.0236	77.2903
chr9	131743535	131745833	2299	43.0387	46.998	39.0794
chr9	127734014	127736237	2224	46.3309	52.714	39.9478
chr16	1378421	1380709	2289	41.4315	36.8363	46.0268
chr17	28040700	28042016	1317	60.2776	57.1597	63.3954
chr4	1345715	1348201	2487	77.8534	74.9427	80.764
chr14	77319949	77322096	2148	143.445	140.994	145.896
chr2	219596615	219598931	2317	41.1009	45.7278	36.4741
chr17	82022184	82024171	1988	104.47	107.333	101.606
chr2	219175963	219178878	2916	68.5146	66.6863	70.3428
chr1	45685470	45688992	3523	79.3957	90.1853	68.606
chr9	129080078	129081990	1913	107.762	113.049	102.475
chr17	7855218	7859700	4483	83.3491	78.1183	88.5799
chr15	100601051	100603462	2412	91.9037	88.28	95.5273
chr17	61456616	61471431	14816	199.465	200.059	198.87
chr15	90387522	90389456	1935	92.0397	94.6311	89.4483
chr12	56359825	56361096	1272	75.1769	63.5108	86.843
chr1	27725098	27726994	1897	61.1784	54.6193	67.7375
chr11	86067805	86070019	2215	61.2302	59.065	63.3954
chr13	45333005	45336387	3383	44.9571	41.282	48.6321
chr9	130692942	130694396	1455	33.635	43.8225	23.4476
chr16	81076167	81078560	2394	63.1355	62.8757	63.3954
chr11	119084389	119085926	1538	47.1475	48.2682	46.0268
chr6	43628435	43631046	2612	93.9256	91.4556	96.3957
chr14	64386765	64389520	2756	97.6196	99.712	95.5273
chr20	47313791	47316585	2795	46.1494	58.4299	33.8688
chr2	25976539	25978399	1861	22.9549	21.5937	24.316
chr8	122785442	122786897	1456	32.7797	34.2958	31.2635
chr2	127387006	127389183	2178	81.3983	86.3747	76.4218
chr12	123363374	123366074	2701	58.2556	53.9842	62.527
chr4	1711671	1714025	2355	60.8802	60.9704	60.7901
chr1	149557913	149559608	1696	67.7498	75.5779	59.9217
chr1	180228300	180232497	4198	48.5992	45.0927	52.1058
chr2	240585406	240587454	2049	39.092	33.0256	45.1584
chrX	15673938	15676225	2288	61.1136	59.7002	62.527
chr9	83920256	83922045	1790	54.8143	51.4438	58.1848
chr15	90264575	90266725	2151	38.5605	40.6469	36.4741
chr1	36384547	36387546	3000	110.853	117.495	104.212
chr19	16110796	16113090	2295	102.266	109.874	94.6589
chr2	100562258	100563814	1557	95.5328	101.617	89.4483
chr17	81859419	81862149	2731	116.693	102.252	131.133
chr7	26199484	26203035	3552	147.606	146.71	148.502
chr2	86104662	86106869	2208	46.3309	52.714	39.9478
chr20	13638147	13639542	1396	63.1162	55.8895	70.3428
chr12	64451651	64453326	1676	48.3335	48.9033	47.7637
chr12	62602133	62605197	3065	61.3663	65.4161	57.3164
chr11	119093245	119096195	2951	75.2805	72.4023	78.1587
chr20	53667708	53682257	14550	258.103	249.597	266.608
chr17	64128905	64131526	2622	107.574	102.252	112.896
chr20	50753584	50755985	2402	43.6026	36.8363	50.3689
chr16	70064360	70067463	3104	65.8575	62.2406	69.4744
chr5	181216224	181219153	2930	63.1031	65.4161	60.7901
chr11	62543412	62547327	3916	63.1355	62.8757	63.3954
chr3	196316926	196318791	1866	58.774	55.8895	61.6585
chr1	151789507	151792035	2529	125.798	111.779	139.817
chr17	56832765	56835454	2690	114.405	102.888	125.922
chr17	62806546	62808943	2398	68.2164	73.0374	63.3954
chr17	59897005	59901050	4046	53.2783	52.714	53.8427
chr7	100538364	100539801	1438	110.134	114.319	105.948
chr5	132495266	132498421	3156	63.8355	59.065	68.606
chr14	35045532	35047631	2100	94.5801	99.712	89.4483
chr2	108448508	108450070	1563	57.4844	46.3629	68.606
chr14	39266473	39268164	1692	49.1177	46.998	51.2374
chr1	202014740	202020117	5378	135.655	121.941	149.37
chr15	63472690	63475212	2523	34.8665	32.3905	37.3425
chr20	5118737	5120431	1695	49.1046	56.5246	41.6846
chr17	63740452	63743430	2979	138.539	151.156	125.922
chr19	15418327	15419712	1386	49.837	50.1735	49.5005
chr8	94822172	94824707	2536	72.941	68.5917	77.2903
chr13	36998294	37001426	3133	51.4572	50.8086	52.1058
chr19	43667863	43669594	1732	112.351	102.252	122.449
chr17	14300440	14303016	2577	67.698	71.1321	64.2638
chr16	1572448	1574884	2437	25.3268	22.8639	27.7898
chr17	50949279	50951335	2057	60.3294	61.6055	59.0532
chr20	48678654	48684474	5821	48.7353	51.4438	46.0268
chr7	87218872	87221588	2717	58.5407	57.1597	59.9217
chr14	66506897	66509461	2565	59.1952	65.4161	52.9742
chr1	202887473	202890280	2808	83.1482	76.8481	89.4483
chr5	173887489	173889025	1537	56.2205	60.3353	52.1058
chr5	32312119	32314199	2081	80.2641	90.1853	70.3428
chr6	3063306	3064941	1636	51.6257	54.6193	48.6321
chr19	11344056	11347344	3289	87.73	92.0907	83.3693
chr11	77034836	77037045	2210	30.8095	35.5661	26.0529
chr17	61574268	61576286	2019	39.6298	41.9171	37.3425
chr9	113409454	113411713	2260	58.0353	45.7278	70.3428
chr16	67158878	67161332	2455	48.2817	44.4576	52.1058
chr19	42242473	42243740	1268	115.461	113.684	117.238
chr11	62600721	62602425	1705	63.4855	60.9704	66.0007
chr2	30871180	30873293	2114	33.2463	31.7554	34.7372
chr16	85305506	85307310	1805	43.3693	38.1065	48.6321
chr6	87154637	87156819	2183	48.3141	41.9171	54.7111
chr17	28719208	28720898	1691	55.5012	57.1597	53.8427
chr6	44245316	44248344	3029	57.9898	57.7948	58.1848
chr13	30616687	30618925	2239	65.5917	66.0512	65.1323
chr3	189937126	189938482	1357	50.187	48.2682	52.1058
chr12	109572456	109575340	2885	67.2183	83.1992	51.2374
chr2	113603372	113604613	1242	55.4818	50.1735	60.7901
chr1	204072748	204075861	3114	52.9283	54.6193	51.2374
chr12	51046906	51048714	1809	43.4729	46.998	39.9478
chr3	150762730	150764276	1547	77.0822	67.3215	86.843
chr17	41687241	41690038	2798	100.854	84.4694	117.238
chr14	103853611	103856739	3129	51.4442	60.3353	42.5531
chrX	123858104	123860943	2840	58.0547	52.714	63.3954
chr17	60118843	60124135	5293	96.0706	110.509	81.6324
chr20	21125042	21127014	1973	59.9276	59.065	60.7901
chr19_GL949752v1_alt	164217	166904	2688	65.1575	66.0512	64.2638
chr1	21251326	21252920	1595	57.0372	55.8895	58.1848
chr11	69638044	69641865	3822	71.7744	74.9427	68.606
chr15	82044489	82047961	3473	101.774	88.9151	114.633
chr8	108442628	108444488	1861	83.9648	72.4023	95.5273
chr7	87151564	87153859	2296	72.591	70.497	74.685
chr17	43245332	43247299	1968	113.776	118.13	109.422
chr19	39030884	39032608	1725	72.1761	77.4832	66.8691
chr1	6204632	6207222	2591	45.2422	44.4576	46.0268
chr1	154219428	154222055	2628	70.0506	65.4161	74.685
chr15	90232977	90235040	2064	86.4404	82.564	90.3167
chr9	33228466	33231094	2629	54.7819	53.9842	55.5795
chr6	85592668	85594868	2201	77.5228	83.8343	71.2113
chr3	38136700	38138063	1364	67.0435	62.8757	71.2113
chr20	49980504	49983184	2681	60.096	62.8757	57.3164
chr21	45402653	45405100	2448	40.9779	29.8501	52.1058
chr2	189540405	189542998	2594	42.5202	45.0927	39.9478
chr16	46385637	46392430	6794	152.006	167.669	136.344
chr8	134831997	134833576	1580	75.8314	71.7672	79.8956
chr15	75367343	75369868	2526	64.0364	60.3353	67.7375
chr3	108588539	108590330	1792	57.8732	58.4299	57.3164
chr2	38073588	38077896	4309	127.036	116.86	137.212
chr7	144354536	144356527	1992	74.0103	69.8619	78.1587
chr10	5545905	5549467	3563	48.1132	40.6469	55.5795
chr15	72472989	72475544	2556	70.1672	64.781	75.5534
chr13	31160758	31163086	2329	56.8556	61.6055	52.1058
chr5	136057682	136059567	1886	44.8404	41.9171	47.7637
chr2	42809624	42811461	1838	56.1232	67.9566	44.2899
chr16	21952092	21954214	2123	53.7643	57.1597	50.3689
chr17	62790115	62792587	2473	87.6457	90.1853	85.1061
chr19	41859356	41861155	1800	62.0144	57.1597	66.8691
chr6	43012918	43014586	1669	47.1475	48.2682	46.0268
chr11	63937752	63939970	2219	62.5198	68.5917	56.448
chr19	34998871	35002231	3361	109.7	114.319	105.08
chr12	52870170	52875145	4976	130.73	125.116	136.344
chr7	100427668	100431024	3357	204.974	193.708	216.239
chr12	6960523	6964128	3606	75.5526	85.1045	66.0007
chr20	17681980	17683154	1175	64.4188	55.8895	72.9481
chr1	108746196	108748021	1826	83.2387	95.2662	71.2113
chr17	22522191	22523521	1331	29.4032	26.6745	32.1319
chr20	53709040	53716186	7147	131.287	140.994	121.58
chr16	2881549	2884260	2712	122.363	125.751	118.975
chr1	173823357	173825413	2057	57.0241	65.4161	48.6321
chr16	57734794	57737259	2466	45.3588	43.8225	46.8952
chr16	4767955	4770153	2199	32.8963	33.6607	32.1319
chr20	62898780	62901680	2901	54.0301	53.3491	54.7111
chr17	41792235	41794248	2014	33.849	35.5661	32.1319
chr6	3117863	3119443	1581	54.9309	50.8086	59.0532
chr1	235073070	235076237	3168	83.9193	84.4694	83.3693
chr17	61926306	61928921	2616	76.2007	76.8481	75.5534
chr16	29810464	29813509	3046	78.3718	76.8481	79.8956
chr16	52654	55193	2540	64.7751	70.497	59.0532
chr9	128723288	128725885	2598	118.086	120.671	115.501
chr7	44998626	45001191	2566	99.3696	90.1853	108.554
chr16	4733384	4735503	2120	61.8653	60.3353	63.3954
chr20	57107716	57117763	10048	160.736	155.601	165.87
chr4	127880379	127882070	1692	60.9645	62.8757	59.0532
chr14	77096585	77099445	2861	88.4493	95.2662	81.6324
chr7	21426319	21428936	2618	131.346	119.4	143.291
chr11	65850332	65853962	3631	48.165	45.0927	51.2374
chr15	84929565	84930662	1098	62.4162	59.7002	65.1323
chr8	143941432	143945006	3575	235.641	206.41	264.871
chr2	173963025	173966400	3376	93.7378	80.6587	106.817
chr1	47312826	47315166	2341	61.0811	62.2406	59.9217
chr8	98825001	98826852	1852	90.8019	89.5502	92.0536
chr20	52190598	52192699	2102	24.1733	19.6883	28.6582
chr9	136798830	136801689	2860	105.371	104.793	105.948
chr14	65254683	65256651	1969	34.8665	32.3905	37.3425
chr9	63816633	63818520	1888	49.3186	48.2682	50.3689
chr20	25194934	25197301	2368	47.8799	41.9171	53.8427
chr20	57271957	57278936	6980	159.686	161.317	158.054
chr20	47422189	47425602	3414	29.6041	27.9448	31.2635
chr5	180860493	180862009	1517	53.4274	49.5384	57.3164
chr19	40443855	40445375	1521	62.0987	59.065	65.1323
chr12	65168485	65171131	2647	67.0759	60.3353	73.8166
chr20	47383376	47385515	2140	95.2477	98.4417	92.0536
chr7	151226952	151228014	1063	42.5202	45.0927	39.9478
chr1	151057453	151060737	3285	40.4789	34.9309	46.0268
chr1	235327663	235329871	2209	71.3726	72.4023	70.3428
chr5	98927817	98930378	2562	73.1288	79.3885	66.8691
chr1	153607261	153610978	3718	80.1605	81.2938	79.0271
chr7	143379784	143381654	1871	46.7651	52.714	40.8162
chr17	60023468	60035608	12141	260.565	269.286	251.845
chrX	3814352	3816075	1724	59.4609	61.6055	57.3164
chr13	29848363	29851212	2850	40.9325	41.9171	39.9478
chr1	111987955	111992774	4820	95.7661	100.347	91.1852
chr9	107281884	107284619	2736	104.722	113.049	96.3957
chr9	130935942	130937477	1536	35.9034	36.2012	35.6056
chr16	29261209	29263865	2657	49.487	52.0789	46.8952
chr1	202810142	202813368	3227	89.1493	91.4556	86.843
chr19	1250863	1254174	3312	61.496	55.2544	67.7375
chr20	45993057	45994321	1265	42.7017	39.3767	46.0268
chr18	12946999	12948940	1942	84.3535	84.4694	84.2377
chr19	13149846	13157346	7501	245.115	221.018	269.213
chr7	131106018	131108686	2669	39.7465	41.282	38.2109
chr9	125199203	125201377	2175	77.9894	81.2938	74.685
chr14	73457349	73459286	1938	57.7696	49.5384	66.0007
chr6	149863008	149864785	1778	49.6361	48.9033	50.3689
chr8	144463725	144468297	4573	105.889	106.698	105.08
chr1	109424914	109427444	2531	112.273	116.86	107.685
chr16	30747225	30749032	1808	80.828	80.0236	81.6324
chr22	20916704	20918663	1960	54.2634	52.0789	56.448
chr2	70122952	70125393	2442	44.6071	43.1873	46.0268
chr17	81505393	81510190	4798	70.6663	59.7002	81.6324
chr11	62786217	62788459	2243	59.0073	54.6193	63.3954
chr7	129224270	129226728	2459	85.7598	93.3609	78.1587
chr9	104093312	104095154	1843	37.9254	39.3767	36.4741
chr8	128176419	128177699	1281	44.9571	41.282	48.6321
chr1	114779801	114781407	1607	79.3245	78.7534	79.8956
chr21	37266083	37269189	3107	154.443	163.858	145.028
chr9	135498900	135501727	2828	49.351	45.7278	52.9742
chr20	53897344	53900192	2849	56.253	57.7948	54.7111
chr6	125152984	125155492	2509	42.1378	49.5384	34.7372
chr16	89507364	89509464	2101	44.2571	45.0927	43.4215
chr5	181243144	181244696	1553	37.3227	35.5661	39.0794
chr16	2127432	2129297	1866	39.8307	43.1873	36.4741
chr14	100237793	100239596	1804	75.6692	84.4694	66.8691
chr19	14517294	14519162	1869	95.0274	90.1853	99.8695
chr12	52188952	52193061	4110	118.053	123.211	112.896
chr3	61996166	61998948	2783	29.2217	32.3905	26.0529
chr3	63644398	63646230	1833	42.9351	38.1065	47.7637
chr17	2395665	2397425	1761	64.3409	70.497	58.1848
chr12	2811535	2814040	2506	57.925	62.8757	52.9742
chr19	53979623	53981807	2185	65.3909	64.781	66.0007
chr20	53650430	53659710	9281	189.757	186.722	192.791
chr5	141848453	141850509	2057	46.3633	50.1735	42.5531
chr16	30334314	30336267	1954	67.8471	67.9566	67.7375
chr5	137752996	137755573	2578	63.5504	55.8895	71.2113
chr16	30697400	30700479	3080	119.103	117.495	120.712
chr17	51119210	51123047	3838	122.875	111.144	134.607
chr11	47765671	47768867	3197	100.173	95.2662	105.08
chr12	12890176	12892146	1971	151.98	144.17	159.791
chr14	74491829	74494404	2576	139.298	125.751	152.844
chr3	153159844	153163488	3645	114.392	112.414	116.37
chr2	74528766	74531885	3120	61.846	53.3491	70.3428
chr16	31179069	31182120	3052	61.4117	53.3491	69.4744
chr5	126775673	126778989	3317	85.0535	80.6587	89.4483
chr7	131625359	131629011	3653	48.7028	53.9842	43.4215
chr16	54928432	54931119	2688	95.0274	90.1853	99.8695
chr15	65295454	65297182	1729	57.7371	52.0789	63.3954
chr7	127651270	127653065	1796	61.9171	64.781	59.0532
chr8	95268043	95270750	2708	98.4038	97.8066	99.001
chr2	88626715	88628747	2033	128.76	126.387	131.133
chr11	65354157	65355919	1763	44.6395	40.6469	48.6321
chr3	61633872	61635346	1475	26.2471	27.3096	25.1845
chr11	62830739	62833015	2277	91.5861	87.6449	95.5273
chr8	94241550	94242853	1304	34.7498	33.0256	36.4741
chr1	202033946	202036178	2233	72.241	72.4023	72.0797
chr15	76312001	76314610	2610	33.8166	38.1065	29.5266
chr5	138177784	138179434	1651	39.4613	38.1065	40.8162
chr3	136194905	136197364	2460	87.2246	80.6587	93.7904
chr7	73821616	73824264	2649	111.884	104.793	118.975
chr20	49935398	49937965	2568	53.7643	57.1597	50.3689
chr12	53491826	53493687	1862	34.2963	26.0394	42.5531
chr17	61217408	61222011	4604	72.5586	73.0374	72.0797
chr4	98928098	98930392	2295	52.0081	50.1735	53.8427
chr12	112012222	112014829	2608	95.6301	93.996	97.2642
chr16	28950402	28951566	1165	55.2485	51.4438	59.0532
chr20	13994612	13996701	2090	81.2622	80.0236	82.5009
chr1	117267845	117269889	2045	44.9764	48.2682	41.6846
chr16	3003614	3004302	689	74.3797	74.9427	73.8166
chr12	53675254	53676777	1524	55.1318	52.0789	58.1848
chr2	177210887	177214345	3459	83.2973	73.6725	92.922
chr12	52032317	52034179	1863	81.8973	81.2938	82.5009
chr14	58243888	58246307	2420	49.1889	58.4299	39.9478
chr16	1963512	1966269	2758	54.9179	60.3353	49.5005
chr19	11379620	11383793	4174	95.8634	92.7258	99.001
chr11	66854921	66857146	2226	58.5083	59.7002	57.3164
chr15	90934037	90936489	2453	70.4523	67.9566	72.9481
chr16	29898933	29901030	2098	65.0733	64.1459	66.0007
chr1	109250806	109257810	7005	74.3409	60.9704	87.7114
chr21	38906415	38908104	1690	76.5507	74.9427	78.1587
chr8	140510272	140513117	2846	134.644	141.629	127.659
chr12	107764213	107766379	2167	26.4155	31.1203	21.7108
chr12	108730391	108732782	2392	120.924	119.4	122.449
chr16	4612346	4617271	4926	157.761	150.521	165.002
chr17	57084164	57087652	3489	101.307	91.4556	111.159
chr12	57086108	57091152	5045	217.818	199.424	236.213
chr2	158722810	158726811	4002	78.6051	75.5779	81.6324
chr16	70379989	70382525	2537	74.5805	76.213	72.9481
chr3	196287143	196288618	1476	56.6029	55.8895	57.3164
chr2	25877113	25879690	2578	72.4225	66.6863	78.1587
chr19	12680653	12682320	1668	54.6976	52.0789	57.3164
chr2	43225395	43229019	3625	70.6726	76.213	65.1323
chr2	8573019	8575185	2167	55.0994	54.6193	55.5795
chr20	57778865	57780181	1317	40.2131	38.7416	41.6846
chr2	87074898	87077538	2641	59.8627	64.1459	55.5795
chr3	160754275	160756799	2525	54.2634	52.0789	56.448
chr8	119873134	119875247	2114	56.6223	62.8757	50.3689
chr3	183635111	183637240	2130	65.0084	69.2268	60.7901
chr1	24744730	24745986	1257	59.0267	61.6055	56.448
chr16	31032538	31034563	2026	46.3115	45.7278	46.8952
chr20	31572269	31574633	2365	152.771	158.777	146.765
chr2	70247856	70249690	1835	64.9242	67.3215	62.527
chr17	60011417	60020425	9009	78.6894	77.4832	79.8956
chr20	53717580	53721400	3821	29.0532	28.5799	29.5266
chr3	50604747	50606696	1950	36.7588	45.7278	27.7898
chr3	197296945	197299846	2902	65.8381	55.2544	76.4218
chr17	64973759	64976899	3141	178.059	167.669	188.449
chr5	134903902	134906154	2253	61.3793	55.8895	66.8691
chr1	207052344	207053845	1502	92.3897	92.7258	92.0536
chr9	89317142	89320033	2892	81.4956	78.7534	84.2377
chr17	7403534	7405473	1940	105.053	104.158	105.948
chr3	14651013	14652774	1762	52.9608	52.0789	53.8427
chr21	40382082	40383698	1617	82.5518	89.5502	75.5534
chr12	49322545	49323663	1119	43.5571	48.9033	38.2109
chr16	31457587	31460842	3256	140.756	139.089	142.423
chr16	11333132	11334623	1492	55.3003	55.8895	54.7111
chr1	153965883	153969435	3553	80.6271	78.7534	82.5009
chr1	186373933	186376508	2576	122.713	123.846	121.58
chr8	100719621	100723232	3612	197.482	210.856	184.107
chr1	201739506	201742946	3441	80.8474	87.0098	74.685
chr10	102501307	102504357	3051	104.923	114.319	95.5273
chr2	38094923	38097178	2256	62.831	52.714	72.9481
chr17	21042559	21044287	1729	89.2659	90.8205	87.7114
chr17	8117363	8121191	3829	82.3964	76.213	88.5799
chr7	66994258	66995812	1555	57.5038	53.3491	61.6585
chr10	102132214	102134369	2156	55.7021	58.4299	52.9742
chr7	44580931	44583605	2675	72.8243	69.2268	76.4218
chr7	44038550	44040800	2251	86.5764	88.9151	84.2377
chr7	6348047	6349687	1641	65.9548	54.6193	77.2903
chr11	64316763	64319091	2329	75.9999	75.5779	76.4218
chr20	47566185	47569270	3086	45.8124	50.8086	40.8162
chr20	50188920	50192627	3708	97.0363	102.888	91.1852
chr20	48830712	48833147	2436	21.8855	20.3235	23.4476
chr16	30377146	30379523	2378	108.643	103.523	113.764
chr1	183635149	183636467	1319	63.0189	63.5108	62.527
chr12	6469806	6471704	1899	59.5776	60.9704	58.1848
chr15	67124203	67128653	4451	132.123	143.534	120.712
chrX	47217104	47219336	2233	114.308	110.509	118.106
chr16	19066951	19069292	2342	58.0223	55.2544	60.7901
chr11	68762465	68764581	2117	55.2679	58.4299	52.1058
chr14	104863246	104866946	3701	62.2995	60.3353	64.2638
chr15	90931237	90933030	1794	45.644	46.998	44.2899
chr15	43775298	43778046	2749	38.1263	40.6469	35.6056
chr3	197626093	197628659	2567	43.5377	41.9171	45.1584
chr15	72685249	72687567	2319	63.0513	60.9704	65.1323
chr3	129160361	129162795	2435	28.3533	32.3905	24.316
chr5	96933862	96936585	2724	71.7226	70.497	72.9481
chr20	33992125	33994735	2611	131.935	132.738	131.133
chr19	54136042	54137857	1816	62.5135	52.0789	72.9481
chr7	101880941	101884246	3306	79.8429	80.6587	79.0271
chr22	38704679	38706179	1501	59.8758	54.6193	65.1323
chr6	154732533	154735295	2763	71.6059	71.1321	72.0797
chr16	70938	73019	2082	43.3693	38.1065	48.6321
chr10	97497548	97499861	2314	106.122	105.428	106.817
chr5	173451968	173455883	3916	53.6995	62.2406	45.1584
chr1	116569121	116572113	2993	83.6797	69.2268	98.1326
chr2	24792446	24794446	2001	47.815	46.998	48.6321
chr2	174247631	174249288	1658	52.4941	54.6193	50.3689
chr9	86353543	86355146	1604	55.7151	48.9033	62.527
chr20	31677880	31680571	2692	35.4692	36.2012	34.7372
chr2	231463268	231465768	2501	82.7464	74.3076	91.1852
chr12	131882069	131884570	2502	43.5702	39.3767	47.7637
chr9	137239661	137241619	1959	123.16	114.319	132.001
chr12	57844310	57847772	3463	94.295	96.5364	92.0536
chr16	718905	722003	3099	58.4565	55.2544	61.6585
chr3	186108392	186110191	1800	70.1024	69.8619	70.3428
chr17	60160955	60164128	3174	28.7033	30.4852	26.9213
chr11	73982202	73984045	1844	103.699	99.712	107.685
chr16	67173080	67174843	1764	49.4677	45.0927	53.8427
chr22	37196464	37200313	3850	87.3606	87.0098	87.7114
chr9	136692917	136696466	3550	70.7568	78.1183	63.3954
chr19	40749318	40752029	2712	119.79	123.211	116.37
chr8	144136247	144138620	2374	73.4788	77.4832	69.4744
chr7	45110676	45112456	1781	35.7867	36.8363	34.7372
chr5	139340489	139343472	2984	55.9354	57.1597	54.7111
chr16	67845410	67848637	3228	71.0226	74.3076	67.7375
chr20	50509399	50511165	1767	106.861	115.59	98.1326
chr9	35603615	35605301	1687	60.0442	58.4299	61.6585
chr1	150559856	150564441	4586	169.42	155.601	183.239
chr12	79934040	79936143	2104	44.1211	38.7416	49.5005
chr15	82942093	82943859	1767	58.3074	58.4299	58.1848
chr6	139373562	139376222	2661	40.7185	50.1735	31.2635
chr7	123747160	123749882	2723	50.8739	53.9842	47.7637
chr19	10870325	10871593	1269	100.711	104.158	97.2642
chr17	19376873	19379014	2142	107.756	96.5364	118.975
chr17	50903756	50906159	2404	54.5485	55.2544	53.8427
chr8	123180994	123183179	2186	49.6037	51.4438	47.7637
chr14	100304236	100308862	4627	66.6935	64.781	68.606
chr1	218479667	218481797	2131	50.2906	57.1597	43.4215
chr19	43753715	43755933	2219	62.1505	63.5108	60.7901
chr3	50264096	50265757	1662	106.557	105.428	107.685
chr10	42636950	42639062	2113	45.8449	48.2682	43.4215
chr10	133307294	133310785	3492	86.0773	93.996	78.1587
chr9	88386945	88389695	2751	54.4837	60.3353	48.6321
chr1	151836126	151838100	1975	66.6417	60.3353	72.9481
chr17	48816635	48818007	1373	73.1288	79.3885	66.8691
chr7	135557277	135559202	1926	20.868	23.499	18.237
chr7	73521861	73523300	1440	52.4747	47.6331	57.3164
chr9	98254915	98257103	2189	82.7851	88.28	77.2903
chr1	234724138	234726218	2081	36.2534	34.2958	38.2109
chr17	7219511	7221131	1621	49.2668	43.8225	54.7111
chr9	95874248	95877181	2934	50.9906	53.3491	48.6321
chr17	8630291	8631737	1447	62.8374	69.2268	56.448
chr9	128021845	128022881	1037	47.8344	53.9842	41.6846
chr11	63838066	63840929	2864	73.2261	71.7672	74.685
chr7	74788336	74790090	1755	83.4333	80.0236	86.843
chr19	49866487	49868155	1669	62.682	55.8895	69.4744
chr11	75325206	75326843	1638	23.1558	22.8639	23.4476
chr20	48759829	48763276	3448	10.7257	10.1617	11.2896
chr19	45000883	45002751	1869	90.4326	84.4694	96.3957
chr20	63954452	63958534	4083	132.57	134.008	131.133
chr20	53724537	53727607	3071	37.5236	36.8363	38.2109
chr22	24553604	24556489	2886	64.0558	67.3215	60.7901
chr20	53578392	53581358	2967	85.9544	78.1183	93.7904
chr17	47895209	47897724	2516	127.924	123.846	132.001
chr5	109408918	109411048	2131	87.4967	93.3609	81.6324
chr19	48492458	48493871	1414	181.753	175.925	187.581
chr19	54189389	54191264	1876	139.304	142.264	136.344
chr5	95959963	95962376	2414	61.2496	66.0512	56.448
chr20	47983303	47986098	2796	78.7542	72.4023	85.1061
chr11	65569374	65570726	1353	52.0923	52.0789	52.1058
chr16	739829	741822	1994	32.9806	35.5661	30.3951
chr19	16659388	16661148	1761	59.3961	66.6863	52.1058
chr16	4692066	4694937	2872	85.1053	85.1045	85.1061
chr2	98868242	98870577	2336	68.897	62.2406	75.5534
chr16	31093726	31095298	1573	44.1922	50.1735	38.2109
chr1	169892884	169895787	2904	47.5169	53.3491	41.6846
chr2	131491337	131494354	3018	61.5153	62.2406	60.7901
chr4	139175829	139179216	3388	94.2432	92.0907	96.3957
chr17	40319281	40324012	4732	78.4885	76.213	80.764
chr2	20222187	20226573	4387	62.3126	50.8086	73.8166
chr17	59112518	59116297	3780	35.7025	34.9309	36.4741
chr12	53498989	53502488	3500	161.306	161.953	160.66
chr11	66677082	66679091	2010	79.8754	78.1183	81.6324
chr8	144507631	144510272	2642	57.2187	50.1735	64.2638
chr12	55926326	55928670	2345	38.8456	43.8225	33.8688
chr12	8025941	8027599	1659	45.5791	52.0789	39.0794
chr4	56434436	56437875	3440	94.645	94.6311	94.6589
chr20	19756417	19760459	4043	76.5183	77.4832	75.5534
chr8	142726100	142729979	3880	82.2149	81.9289	82.5009
chr3	49410645	49413288	2644	59.8627	64.1459	55.5795
chr3	156824809	156827725	2917	66.6093	62.8757	70.3428
chr7	93231152	93233174	2023	60.0118	60.9704	59.0532
chr11	118620760	118624232	3473	51.9432	55.2544	48.6321
chr16	3123584	3125390	1807	78.0736	83.1992	72.9481
chr17	61357905	61365580	7676	96.2652	95.2662	97.2642
chr6	75283962	75285450	1489	58.4758	62.2406	54.7111
chr8	102809958	102811505	1548	87.2246	80.6587	93.7904
chr12	56632095	56637674	5580	111.624	125.116	98.1326
chr12	57751198	57753092	1895	74.613	73.6725	75.5534
chr14	37197369	37198853	1485	44.6589	47.6331	41.6846
chr3	5186704	5189516	2813	128.41	128.292	128.528
chr2	70292745	70294566	1822	55.4494	52.714	58.1848
chr5	176534861	176538621	3761	100.724	94.6311	106.817
chr5	181221218	181224302	3085	143.743	134.643	152.844
chr12	105214211	105216032	1822	30.291	33.6607	26.9213
chr5	150758074	150759518	1445	58.9943	64.1459	53.8427
chr7	63925034	63927304	2271	47.1993	52.714	41.6846
chr17	74756650	74762306	5657	134.022	130.832	137.212
chr8	96261183	96263388	2206	44.1922	50.1735	38.2109
chr3	49092842	49095212	2371	55.08	47.6331	62.527
chr12	56157111	56160082	2972	67.5426	57.7948	77.2903
chr1	205748558	205750801	2244	133.659	142.264	125.054
chr19	38898511	38900856	2346	56.3566	66.6863	46.0268
chr1	161460414	161463296	2883	53.9459	51.4438	56.448
chr5	119267802	119269610	1809	58.5213	50.1735	66.8691
chrUn_GL000220v1	119590	127268	7679	140.574	144.805	136.344
chr20	51456135	51457582	1448	104.833	95.9013	113.764
chr5	177310518	177313723	3206	76.9525	77.4832	76.4218
chr1	146190845	146192599	1755	32.2288	34.9309	29.5266
chr12	39442097	39444366	2270	64.0688	57.7948	70.3428
chr9	133458680	133462526	3847	145.785	144.805	146.765
chr17	3667464	3669259	1796	62.5329	59.065	66.0007
chr19	49875182	49878985	3804	160.12	161.317	158.923
chr2	32356069	32358037	1969	43.2202	41.282	45.1584
chr20	50756287	50759667	3381	37.5105	46.3629	28.6582
chr11	45846823	45849047	2225	76.784	73.6725	79.8956
chr12	120227613	120232618	5006	100.128	107.333	92.922
chr1	23366428	23370079	3652	58.411	67.3215	49.5005
chr10	75209617	75211789	2173	42.6563	51.4438	33.8688
chr20	54109339	54111075	1737	35.521	40.6469	30.3951
chr1	176206387	176208336	1950	61.4442	50.8086	72.0797
chr10	102917343	102919477	2135	65.1057	61.6055	68.606
chr1	179881409	179883947	2539	76.6543	83.8343	69.4744
chr19	45583636	45585671	2036	111.249	103.523	118.975
chr14	68976866	68980825	3960	78.7542	72.4023	85.1061
chr1	202007502	202011198	3697	71.1523	64.1459	78.1587
chr7	32889843	32893264	3422	81.9685	92.7258	71.2113
chr20	53869206	53872383	3178	98.3065	105.428	91.1852
chr21	45914571	45916904	2334	22.8058	24.7692	20.8423
chr16	74666187	74668225	2039	41.5158	38.7416	44.2899
chr19	36053469	36056419	2951	117.587	125.751	109.422
chr12	53179640	53182704	3065	51.5739	50.1735	52.9742
chr3	63937182	63938645	1464	37.8411	37.4714	38.2109
chr9	136995448	136997835	2388	46.48	49.5384	43.4215
chr3	156673685	156676986	3302	101.897	104.793	99.001
chr12	69738072	69740038	1967	64.2373	61.6055	66.8691
chr3	129439254	129441076	1823	89.3308	85.7396	92.922
chr3	64488766	64493034	4269	83.4721	93.996	72.9481
chr14	24231422	24233682	2261	46.979	44.4576	49.5005
chr20	44746720	44748380	1661	26.0786	23.499	28.6582
chr20	36772915	36774903	1989	39.578	37.4714	41.6846
chr17	75031818	75036144	4327	81.2492	89.5502	72.9481
chr17	49787748	49789893	2146	83.7378	90.1853	77.2903
chr8	144102549	144105931	3383	90.4519	91.4556	89.4483
chr1	146938071	146940147	2077	58.3074	58.4299	58.1848
chr10	35126438	35128455	2018	66.0066	59.065	72.9481
chr5	179857601	179859420	1820	52.073	45.0927	59.0532
chr16	46688138	46691025	2888	88.5984	92.0907	85.1061
chr19	48713136	48714983	1848	99.5056	96.5364	102.475
chr7	6503077	6505216	2140	96.1616	86.3747	105.948
chr14	34980859	34983970	3112	82.6167	84.4694	80.764
chr3	12661938	12664938	3001	76.9849	74.9427	79.0271
chr12	95216713	95219066	2354	67.6007	78.7534	56.448
chr6	43173857	43175558	1702	56.0714	63.5108	48.6321
chr2	112583580	112585606	2027	52.0599	54.6193	49.5005
chr4	83012148	83014414	2267	50.3555	52.0789	48.6321
chr17	60150763	60153240	2478	20.7838	21.5937	19.9739
chr15	82261570	82263675	2106	47.2317	50.1735	44.2899
chr22	21641027	21642578	1552	37.4718	32.3905	42.5531
chr9	136840449	136843685	3237	65.3454	76.8481	53.8427
chr1	32393605	32395356	1752	60.7248	47.6331	73.8166
chr19	35642935	35645722	2788	65.5724	59.065	72.0797
chr16	88452174	88453485	1312	80.8798	84.4694	77.2903
chr12	53440711	53442622	1912	73.913	77.4832	70.3428
chr9	136544486	136547781	3296	53.6152	60.3353	46.8952
chr6	136549262	136551296	2035	55.4688	59.7002	51.2374
chr4	48340643	48342380	1738	74.7621	70.497	79.0271
chr15	92808057	92810257	2201	58.6898	53.9842	63.3954
chr7	142812477	142814816	2340	22.6049	23.499	21.7108
chr9	129332831	129335216	2386	80.6402	69.2268	92.0536
chr1	204493385	204495473	2089	52.1054	42.5522	61.6585
chr20	54088913	54091623	2711	32.663	34.9309	30.3951
chr16	29593894	29596234	2341	115.662	114.955	116.37
chr17_KI270861v1_alt	146162	147659	1498	44.6782	54.6193	34.7372
chr14	24429397	24432524	3128	44.2247	47.6331	40.8162
chr9	93201045	93203232	2188	60.3424	52.0789	68.606
chr1	150235356	150236784	1429	51.9108	57.7948	46.0268
chr14	101947543	101949353	1811	80.6078	71.7672	89.4483
chr6	152982674	152985528	2855	80.5429	76.8481	84.2377
chr13	24159499	24162051	2553	67.7498	75.5779	59.9217
chr10	5465359	5467262	1904	41.7685	44.4576	39.0794
chr11	73779170	73780555	1386	55.8187	57.7948	53.8427
chr13	27619647	27623042	3396	124.567	123.211	125.922
chr16	8796436	8798830	2395	43.2071	50.8086	35.6056
chr5	177453765	177456852	3088	88.1187	104.158	72.0797
chr1	113388190	113392534	4345	96.4337	99.0769	93.7904
chr9	122904196	122906038	1843	69.6357	72.4023	66.8691
chr7	120950093	120951821	1729	45.3913	41.282	49.5005
chr7	44747841	44748897	1057	44.2053	40.6469	47.7637
chr6	26310825	26313732	2908	32.0279	33.6607	30.3951
chr16	67244217	67248022	3806	85.7535	76.8481	94.6589
chr16	29458993	29461276	2284	69.0655	66.0512	72.0797
chr16	30947677	30951005	3329	78.2552	77.4832	79.0271
chr1	155308102	155310308	2207	57.8214	53.9842	61.6585
chr19	38683002	38684866	1865	59.0916	56.5246	61.6585
chr19	38302269	38305705	3437	71.2104	85.1045	57.3164
chr16	1342575	1344136	1562	74.4445	69.8619	79.0271
chr20	47351108	47353245	2138	56.2205	60.3353	52.1058
chr7	5422760	5430946	8187	121.728	124.481	118.975
chr3	194002274	194004731	2458	87.3476	96.5364	78.1587
chr16	27363367	27366006	2640	56.1039	60.9704	51.2374
chr9	4791933	4793850	1918	74.3927	65.4161	83.3693
chr17	49676974	49678756	1783	65.1057	61.6055	68.606
chr2	219497577	219499466	1890	73.9779	72.4023	75.5534
chr8	133569766	133573130	3365	75.2481	74.9427	75.5534
chr3	64205807	64208789	2983	24.5944	29.215	19.9739
chr1	998298	1001539	3242	90.2447	73.6725	106.817
chr10	68330179	68332994	2816	49.2343	46.3629	52.1058
chr8	106657065	106659346	2282	53.9134	53.9842	53.8427
chr19	38335009	38337715	2707	90.6334	85.7396	95.5273
chrX	16785732	16787228	1497	68.2295	63.5108	72.9481
chr20	43456846	43458555	1710	49.215	39.3767	59.0532
chr19	36214019	36215534	1516	55.7539	62.8757	48.6321
chr2	133504045	133505739	1695	29.7402	34.2958	25.1845
chr17	75548725	75550616	1892	177.411	175.925	178.897
chr3	64329844	64334035	4192	94.3792	98.4417	90.3167
chr1	117604362	117607700	3339	95.9476	94.6311	97.2642
chr17	63840388	63843628	3241	131.903	135.278	128.528
chr1	144418007	144420109	2103	56.875	68.5917	45.1584
chr13	19862193	19865758	3566	145.668	145.44	145.896
chr7	80918484	80920543	2060	65.0539	57.1597	72.9481
chr14	101759706	101761808	2103	142.11	143.534	140.686
chr1	151193643	151200517	6875	195.252	189.897	200.607
chr2	9422232	9424427	2196	41.3018	46.998	35.6056
chr11	59615401	59617010	1610	54.6976	52.0789	57.3164
chr12	57764980	57767469	2490	34.4841	36.8363	32.1319
chr17	7685440	7689353	3914	57.4908	62.8757	52.1058
chr6	16761074	16763744	2671	70.7505	61.6055	79.8956
chr3	15291989	15293832	1844	43.7711	40.6469	46.8952
chr11	119101059	119103330	2272	57.925	62.8757	52.9742
chr20	57717262	57719388	2127	131.099	130.197	132.001
chr3	128878114	128880338	2225	36.8561	38.1065	35.6056
chr3	115146963	115148417	1455	66.5575	58.4299	74.685
chr20	35741057	35743117	2061	78.3524	69.8619	86.843
chr16	30760557	30762855	2299	71.8716	67.3215	76.4218
chr14	96390898	96392898	2001	83.5175	81.9289	85.1061
chr12	113245238	113247319	2082	41.9824	36.2012	47.7637
chr20	31738604	31739847	1244	48.2168	49.5384	46.8952
chr17	76670652	76673331	2680	45.2616	51.4438	39.0794
chr6	37818382	37819914	1533	44.3219	40.0118	48.6321
chrX	41332271	41335013	2743	55.7539	62.8757	48.6321
chr16	75432416	75435926	3511	75.935	80.6587	71.2113
chr6	106324278	106326111	1834	62.9216	71.1321	54.7111
chr1	228620798	228622986	2189	31.477	34.2958	28.6582
chr11	67505312	67509159	3848	152.265	147.345	157.186
chr3	14123808	14127161	3354	95.831	95.2662	96.3957
chr21	8457580	8460069	2490	57.3547	56.5246	58.1848
chr20	3766645	3769447	2803	91.4046	93.3609	89.4483
chr8	123272892	123275862	2971	123.497	121.941	125.054
chrX	154546308	154547902	1595	66.7129	71.7672	61.6585
chr2	177263352	177265539	2188	45.294	48.9033	41.6846
chr16	27549496	27551073	1578	57.4389	58.4299	56.448
chr19	39340946	39342610	1665	71.1717	71.1321	71.2113
chr12	6850941	6853614	2674	104.742	120.035	89.4483
chr3	64341996	64346534	4539	96.0319	96.5364	95.5273
chr1	147668648	147671199	2552	56.1881	62.8757	49.5005
chr9	77176797	77179314	2518	56.6029	55.8895	57.3164
chr17	58595304	58597312	2009	37.07	29.8501	44.2899
chr20	53901778	53908979	7202	141.028	151.791	130.265
chr14	90442978	90445426	2449	109.298	111.779	106.817
chr1	45582868	45585462	2595	66.5768	65.4161	67.7375
chr3	129505945	129508234	2290	56.3696	57.1597	55.5795
chr19	47647706	47649799	2094	105.001	99.712	110.291
chr5	138541736	138544381	2646	94.2238	85.1045	103.343
chr5	140400062	140404162	4101	155.026	160.682	149.37
chr13	110914069	110915971	1903	67.4777	62.8757	72.0797
chr3	149812122	149814392	2271	56.253	57.7948	54.7111
chr2	61016111	61019034	2924	49.5195	49.5384	49.5005
chr7	77536351	77538477	2127	71.055	71.7672	70.3428
chr7	73736727	73739820	3094	94.8589	86.3747	103.343
chr1	145607406	145609058	1653	61.5153	62.2406	60.7901
chr12	48955966	48958628	2663	43.3562	47.6331	39.0794
chr17	68035073	68036605	1533	71.405	69.8619	72.9481
chr19	14528693	14530281	1589	76.3629	64.1459	88.5799
chr1	172532073	172534087	2015	136.783	144.17	129.396
chr19	50214197	50216184	1988	57.5556	57.7948	57.3164
chr3	9791977	9794884	2908	59.8433	57.1597	62.527
chr19	10652653	10654799	2147	71.1199	66.6863	75.5534
chr2	108533432	108534607	1176	52.7792	57.7948	47.7637
chr1	10032298	10033946	1649	45.8773	45.7278	46.0268
chr20	42190283	42193664	3382	65.9093	66.6863	65.1323
chr4	39637107	39639965	2859	48.6704	56.5246	40.8162
chr17	48046949	48049596	2648	162.479	172.114	152.844
chr7	2553772	2556381	2610	59.6812	69.8619	49.5005
chr14	23285184	23287293	2110	104.768	100.982	108.554
chr8	102410229	102413646	3418	92.8563	90.1853	95.5273
chr17	61478065	61484736	6672	64.0688	57.7948	70.3428
chr4	190177213	190180148	2936	74.963	71.7672	78.1587
chr3	39149438	39154187	4750	104.081	95.2662	112.896
chr2	71226631	71227983	1353	65.5724	59.065	72.0797
chr9	113274321	113276490	2170	49.7528	48.2682	51.2374
chr9	134408513	134415167	6655	66.525	60.9704	72.0797
chr16	84115986	84117972	1987	57.2899	61.6055	52.9742
chr12	53219826	53222423	2598	69.0137	61.6055	76.4218
chr20	3846077	3848330	2254	45.3458	53.3491	37.3425
chr7	151519228	151521472	2245	87.1467	95.2662	79.0271
chr7	1557936	1560193	2258	52.909	47.6331	58.1848
chr10	43395279	43397972	2694	58.5083	59.7002	57.3164
chr1	111975572	111979226	3655	51.723	46.998	56.448
chr19	18151089	18154696	3608	76.421	85.1045	67.7375
chr17	17445060	17447447	2388	66.4408	59.065	73.8166
chr7	105520590	105523216	2627	83.6666	78.7534	88.5799
chr16	29610140	29614036	3897	47.3678	56.5246	38.2109
chr20	53682374	53687225	4852	66.4277	68.5917	64.2638
chr14	73759678	73761049	1372	59.9731	46.998	72.9481
chr18	21599988	21601587	1600	58.7092	60.9704	56.448
chr19	12937430	12939611	2182	62.5004	61.6055	63.3954
chr14	54901462	54903740	2279	68.9812	64.1459	73.8166
chr3	64156282	64159148	2867	94.9301	97.8066	92.0536
chr5	132962330	132964424	2095	74.8981	76.8481	72.9481
chr20	53630618	53643880	13263	175.408	179.736	171.081
chr7	159014700	159016714	2015	59.2276	62.8757	55.5795
chr6	108557168	108561845	4678	113.938	105.428	122.449
chr3	15205599	15207499	1901	59.26	60.3353	58.1848
chr2	150484239	150487033	2795	52.5265	52.0789	52.9742
chr3	139934383	139936791	2409	27.5821	24.7692	30.3951
chr16	29468034	29470560	2527	70.8023	66.0512	75.5534
chr19	11088545	11091183	2639	76.0323	73.0374	79.0271
chr6	138467986	138469555	1570	39.0078	31.1203	46.8952
chr16	22232024	22233473	1450	43.0387	46.998	39.0794
chr7	30284014	30285460	1447	92.1888	91.4556	92.922
chr1	203005905	203008187	2283	62.0014	66.6863	57.3164
chr14	31024779	31027705	2927	79.7456	88.28	71.2113
chr17	82457919	82459811	1893	65.8575	62.2406	69.4744
chr20	57172760	57180293	7534	73.8418	66.0512	81.6324
chr9	136790427	136792430	2004	204.572	191.168	217.976
chr21	36319466	36321038	1573	50.0185	44.4576	55.5795
chr3	27482957	27485481	2525	61.9689	69.2268	54.7111
chr15	88637436	88641270	3835	98.4881	99.712	97.2642
chr1	36305319	36307358	2040	55.4494	52.714	58.1848
chrX	41083860	41086955	3096	63.9391	67.9566	59.9217
chr16	1609677	1613809	4133	141.592	141.629	141.554
chr20	20711944	20713759	1816	64.3409	70.497	58.1848
chr8	68852704	68854964	2261	42.4036	45.7278	39.0794
chr20	47179493	47182320	2828	71.755	67.9566	75.5534
chr17	47809964	47811256	1293	47.8668	51.4438	44.2899
chr14	92792445	92795441	2997	95.4292	92.7258	98.1326
chr8	123767485	123769822	2338	89.2466	83.8343	94.6589
chr20	62364727	62367809	3083	74.8981	76.8481	72.9481
chr17	59330211	59334650	4440	79.279	90.8205	67.7375
chr8	128139408	128142714	3307	78.8254	83.8343	73.8166
chr1	174158275	174160653	2379	54.7364	66.0512	43.4215
chr9	128097332	128099376	2045	75.5981	73.0374	78.1587
chr20	45812002	45813605	1604	52.0923	52.0789	52.1058
chr16	75148005	75149848	1844	73.0901	65.4161	80.764
chr7	12686037	12688355	2319	88.7993	93.3609	84.2377
chr20	47537652	47541326	3675	47.5493	50.8086	44.2899
chr19	55460192	55462566	2375	73.3946	75.5779	71.2113
chr1	119139794	119141853	2060	60.2969	64.1459	56.448
chr3	197748833	197751742	2910	51.6257	54.6193	48.6321
chr13	42271043	42272864	1822	55.4494	52.714	58.1848
chr5	181158998	181161630	2633	51.6581	52.0789	51.2374
chr17	44198226	44200647	2422	81.4956	78.7534	84.2377
chr5	178129814	178131905	2092	70.1478	57.7948	82.5009
chr16	85568949	85572245	3297	52.559	49.5384	55.5795
chr2	11529733	11534881	5149	203.23	219.747	186.712
chr11	71447820	71449468	1649	55.0994	54.6193	55.5795
chr7	107742901	107744845	1945	50.0185	44.4576	55.5795
chr14	103332276	103335852	3577	90.6334	85.7396	95.5273
chr20	47765532	47767893	2362	35.884	29.215	42.5531
chr8	109538924	109541067	2144	114.061	121.306	106.817
chr20	47295023	47297868	2846	36.37	33.6607	39.0794
chr1	235066886	235069288	2403	99.1944	112.414	85.9746
chr7	151061871	151063707	1837	45.2746	41.9171	48.6321
chr14	22588466	22590168	1703	77.5682	71.7672	83.3693
chr3	16263979	16265941	1963	58.9101	62.2406	55.5795
chr14	39430835	39433768	2934	92.7397	90.8205	94.6589
chr21	8406167	8411561	5395	80.7114	80.6587	80.764
chr20	47226267	47232119	5853	38.3078	34.9309	41.6846
chr17	78840373	78841893	1521	59.1758	58.4299	59.9217
chr1	114748137	114753798	5662	31.9955	36.2012	27.7898
chr19	47600003	47602079	2077	72.591	70.497	74.685
chr14	99682829	99684813	1985	97.5354	97.8066	97.2642
chr15	33066538	33069533	2996	54.5292	48.2682	60.7901
chr20	53837975	53841262	3288	33.2139	34.2958	32.1319
chr12	121747956	121749860	1905	42.9351	38.1065	47.7637
chr22	19477827	19480585	2759	42.9351	38.1065	47.7637
chr20	53850961	53858790	7830	108.248	117.495	99.001
chr11	62854686	62856956	2271	54.0301	53.3491	54.7111
chr15	82808400	82811453	3054	56.4214	61.6055	51.2374
chr21	8416923	8430486	13564	289.217	295.325	283.108
chr20	50644875	50646646	1772	106.907	103.523	110.291
chr8	124852934	124855745	2812	57.3871	53.9842	60.7901
chr7	129778211	129782005	3795	115.474	104.158	126.791
chr19	9818366	9820457	2092	87.1273	88.28	85.9746
chr7	44795478	44799070	3593	88.0606	83.1992	92.922
chr12	116502641	116504065	1425	23.8751	26.0394	21.7108
chr19	13816961	13818707	1747	63.304	66.6863	59.9217
chr5	90557464	90559477	2014	48.502	52.714	44.2899
chr6	26537259	26539423	2165	46.979	44.4576	49.5005
chr6	43769215	43772749	3535	49.5064	59.065	39.9478
chr12	131895196	131897258	2063	70.4199	70.497	70.3428
chr17	8155157	8157456	2300	102.992	87.0098	118.975
chr17	58956785	58958124	1340	26.6813	27.3096	26.0529
chr1	116900207	116903325	3119	60.66	52.714	68.606
chr5	127029418	127031306	1889	65.4427	69.2268	61.6585
chr11	76787629	76789783	2155	50.7379	47.6331	53.8427
chr1	117589975	117592746	2772	42.3387	50.8086	33.8688
chr19	17469264	17470903	1640	57.9704	50.8086	65.1323
chrUn_GL000220v1	129072	131559	2488	53.9652	58.4299	49.5005
chr7	5528416	5532612	4197	135.027	137.183	132.87
chr12	49129668	49132521	2854	56.1818	46.3629	66.0007
chr9	71767930	71770178	2249	57.4065	60.9704	53.8427
chr14	69356700	69358417	1718	32.8121	31.7554	33.8688
chr1	181104051	181106980	2930	91.923	95.2662	88.5799
chr11	47268504	47271654	3151	67.5619	64.781	70.3428
chr16	2968001	2971517	3517	89.9465	80.0236	99.8695
chr1	151839050	151841336	2287	72.7595	74.3076	71.2113
chr16	21500604	21503258	2655	120.724	118.13	123.317
chr6	43170197	43171786	1590	91.8388	93.3609	90.3167
chr20	47609120	47611348	2229	40.414	40.0118	40.8162
chr16	30417150	30418708	1559	54.244	45.0927	63.3954
chr17	60036728	60038141	1414	85.572	82.564	88.5799
chr3	64684192	64687100	2909	81.7807	81.9289	81.6324
chr16	787330	789083	1754	33.8296	28.5799	39.0794
chr17	7434883	7437729	2847	46.9466	46.998	46.8952
chr3	167733908	167736237	2330	122.11	120.035	124.185
chr1	151070048	151072437	2390	44.7431	49.5384	39.9478
chr3	38164190	38166777	2588	83.4657	77.4832	89.4483
chr22	41446211	41449209	2999	72.6234	67.9566	77.2903
chr3	179562233	179564267	2035	97.0494	93.3609	100.738
chr3	168094583	168097054	2472	74.1463	76.213	72.0797
chr16	72835772	72837450	1679	28.5672	24.1341	33.0003
chr14	32201046	32204617	3572	42.4878	47.6331	37.3425
chr9	83978977	83982394	3418	85.5071	87.6449	83.3693
chr11	69121668	69124690	3023	96.3818	94.6311	98.1326
chr20	46363613	46365029	1417	45.2097	46.998	43.4215
chr14	99271874	99275063	3190	43.7062	45.7278	41.6846
chr2	218269286	218271780	2495	58.0741	59.7002	56.448
chr17	40315775	40318874	3100	68.9164	69.2268	68.606
chr7	137953246	137954858	1613	44.5422	48.2682	40.8162
chr12	120086772	120088017	1246	59.5258	56.5246	62.527
[truncated: 1,291 more rows]

## Sheet: SMARCA1_CUT&Tag
Seqnames	Start	End	Width	Basemean	SMARCA1_Rep1	SMARCA1_Rep2
chr5	178077404	178083054	5651	758.37	651.468	865.271
chr20	44764835	44767308	2474	276.851	196.351	357.351
chr19	18271030	18275947	4918	39.7633	49.4128	30.1138
chr14	105031389	105034867	3479	267.801	243.163	292.439
chr21	43342370	43345535	3166	315.469	278.272	352.666
chr21	6123010	6126595	3586	18.7486	22.1057	15.3915
chr19	13838421	13842358	3938	49.9836	59.8154	40.1518
chr15	66700360	66704053	3694	132.184	113.129	151.238
chr3	196342245	196344668	2424	158.609	136.535	180.683
chr16	88924609	88929775	5167	285.614	283.473	287.754
chr8	127667753	127671087	3335	177.883	145.638	210.128
chrX	47649809	47651674	1866	36.1969	41.6107	30.783
chr7	74580069	74582869	2801	112.633	100.126	125.14
chr21	8229872	8247459	17588	557.35	486.326	628.375
chr3	170356296	170359463	3168	170.761	152.139	189.383
chr16	67403883	67405780	1898	33.0031	31.2081	34.7982
chr2	20071021	20072914	1894	175.418	176.846	173.991
chr20	50623334	50626859	3526	192.913	170.344	215.481
chr7	25861770	25862984	1215	80.5193	76.7198	84.3187
chr16	323403	326043	2641	147.548	137.836	157.261
chr14	105045518	105052769	7252	53.8846	67.6175	40.1518
chrUn_GL000220v1	133101	135873	2773	184.939	166.443	203.436
chr17	74124342	74126579	2238	63.4627	53.3138	73.6116
chr20	44369974	44371421	1448	96.025	68.9178	123.132
chr10	8052893	8056539	3647	87.6711	91.0235	84.3187
chr1	143212414	143221884	9471	331.116	237.961	424.27
chr5_KI270791v1_alt	185455	188084	2630	78.9224	71.5185	86.3263
chr19	13832105	13837159	5055	72.1163	79.3205	64.912
chr15	89087660	89088911	1252	69.5727	70.2181	68.9272
chr19	4373795	4377003	3209	130.75	119.631	141.87
chr10	74176078	74177794	1717	49.0369	55.9144	42.1594
chr10	46047576	46048943	1368	75.8539	75.4195	76.2884
chr21	44428279	44429105	827	47.4781	48.1124	46.8437
chr18	3593027	3596453	3427	101.264	76.7198	125.809
chr8	102647340	102648906	1567	45.3183	58.5151	32.1214
chr17	75513534	75518234	4701	122.576	106.628	138.524
chr21	40335118	40341767	6650	81.0362	87.1225	74.95
chr6	36616375	36618131	1757	106.991	74.1191	139.862
chr5	1325947	1328851	2905	87.9486	94.9245	80.9728
chr9	133512706	133514105	1400	59.189	48.1124	70.2656
chr1	1079149	1081584	2436	187.551	193.75	181.352
chr1	201306733	201310457	3725	124.23	107.928	140.531
chr12	119478264	119480320	2057	55.1168	52.0134	58.2201
chr1	155123501	155130632	7132	257.287	275.671	238.903
chr9	133872691	133878066	5376	199.49	178.146	220.835
chr19	39403161	39404824	1664	27.4291	23.406	31.4522
chr9	127933681	127939770	6090	86.0283	111.829	60.2277
chr1	206894777	206896819	2043	76.9529	68.9178	84.9879
chr16	85470115	85473203	3089	118.131	113.129	123.132
chr16	2427891	2430878	2988	97.4506	85.8222	109.079
chr16	326397	328357	1961	245.622	249.664	241.58
[truncated: 1,048,524+ more rows]

## Sheet: AF_ATACseq
Seqnames	Start	End	Width	log2 fold-change	p value	AFDKO_mean	AAVS1_mean
[truncated: 4,908 more rows]

[truncated: 1 more sheets: PT_ATACseq]
